# Supplementary material for: High-throughput characterization of transcription factors that modulate UVdamage formation and repair at single-nucleotide resolution
Source: Research Square preprint supplement (doi:10.21203/rs.3.rs-8197218/v1), 2025-12-10
Supplement: Supplementary file 1 [file 1843adb2b01647dab2e1f3f8.xlsx]

## Sheet: TOC
Supplementary data for structural analysis from the paper, "High-throughput characterization of transcription factors that modulate UV damage formation and repair at single-nucleotide resolution", Wasserman et al. Included are input sequences for AlphaFold3 (AF3) runs and complete structural measurements for all dipyrimidines in both unbound and TF-bound DNA binding sites.
Table of Contents
#	Dataset	Description
1	AF3_DNA_input	DNA sequences used as input in AF3 runs
2	AF3_protein_input	Protein sequences used as input in AF3 runs
3	TF_bound_DNA_measurements	Complete structural measurements for TF-bound binding site structures predicted with AF3
4	Unbound_DNA_measurements	Complete structural measurements for unbound binding site structures predicted with AF3
Column Name		Content
TF		Name of TF protein
run_name		Name of AF3 run
sequence		Either DNA or protein sequence used as input for AF3 run
UniProt_ID		Unique identifier of UniProt Knowledgebase entry for protein sequence
chain		DNA chain identifier in AF3 run
position		Position relative to the TF binding site motif center
step		Step between adjacent pyrimidines
d22_distance		Distance (Å) between dipyrimidine's C5-C6 bond midpoints
ring_stacking_overlap_area		Area overlap (Å^2) between dipyrimidine base rings (exlcudes exocyclic atoms)
bp_shift		Base pair shift (Å)
pseudorotation_angle		Sugar ring pseudorotation phase angle of the pyrimdine
sugar_pucker		Sugar pucker classification of the pyrimidine
interbase_angle		Dipyrimidine interbase angle
bp_slide		Base pair slide (Å)
d64_distance		Distance (Å) between the 5’ pyrimidine’s C5 and X4 (either O or N) attached to the 3’ pyrimidine’s C4
interbase_dihedral_angle		Dipyrimidine dihedral angle between the C5-C6 bonds
pyrimidine_marker		Pyrimidine (identifier for pseudorotation_angle, sugar_pucker measurements)

## Sheet: 1_AF3_DNA_input
TF	run_name	sequence	sequence_rev_complement
AP1	seq_ap1_cpdseq_1	TGCAGATGAGTCATGAGAAA	TTTCTCATGACTCATCTGCA
AP1	seq_ap1_cpdseq_2	GGAGGGTGAGTCACCAGCCT	AGGCTGGTGACTCACCCTCC
AP1	seq_ap1_cpdseq_3	GTGGGATGAGTCATCACTTA	TAAGTGATGACTCATCCCAC
AP1	seq_ap1_cpdseq_4	GTGGGGTGAGTCATCGCCCT	AGGGCGATGACTCACCCCAC
AP1	seq_ap1_cpdseq_5	GATGGATGAGTCACCATTCT	AGAATGGTGACTCATCCATC
AP1	seq_ap1_cpdseq_6	CGGTGATGAGTCATTTTGGG	CCCAAAATGACTCATCACCG
AP1	seq_ap1_cpdseq_7	ACACTCTGAGTCACCCCCTC	GAGGGGGTGACTCAGAGTGT
AP1	seq_ap1_cpdseq_8	ATCCTCTGAGTCATCCCCTC	GAGGGGATGACTCAGAGGAT
AP1	seq_ap1_cpdseq_9	CTGGAATGACTCATCCCCTA	TAGGGGATGAGTCATTCCAG
AP1	seq_ap1_cpdseq_10	AACAGATGAGTCACTCCCTC	GAGGGAGTGACTCATCTGTT
AP1	seq_ap1_cpdseq_11	AGGAGATGACTCACCTCCTC	GAGGAGGTGAGTCATCTCCT
AP1	seq_ap1_cpdseq_12	CTTGGGTGAGTCACTCACCA	TGGTGAGTGACTCACCCAAG
AP1	seq_ap1_cpdseq_13	TATGGGTGAGTCACAGGTAC	GTACCTGTGACTCACCCATA
AP1	seq_ap1_cpdseq_14	GGAGGGTGAGTCACGCCAAA	TTTGGCGTGACTCACCCTCC
AP1	seq_ap1_cpdseq_15	GTTATCTGACTCATCCCCTG	CAGGGGATGAGTCAGATAAC
AP1	seq_ap1_cpdseq_16	CGGCCGTGACTCACCCCCTT	AAGGGGGTGAGTCACGGCCG
AP1	seq_ap1_cpdseq_17	ATCCCGTGACTCATCCCCTG	CAGGGGATGAGTCACGGGAT
AP1	seq_ap1_cpdseq_18	GCTCTCTGAGTCACTCCCTA	TAGGGAGTGACTCAGAGAGC
AP1	seq_ap1_cpdseq_19	TCATTCTGAGTCATTCCCTG	CAGGGAATGACTCAGAATGA
AP1	seq_ap1_cpdseq_20	AGGAAATGACTCACTCCCTG	CAGGGAGTGAGTCATTTCCT
AP1	seq_ap1_cpdseq_21	TGGGGATGAGTCATGGCGAC	GTCGCCATGACTCATCCCCA
AP1	seq_ap1_cpdseq_22	TAAGGATGAGTCATTTCCAT	ATGGAAATGACTCATCCTTA
AP1	seq_ap1_cpdseq_23	GAAGGCTGAGTCACCAGACC	GGTCTGGTGACTCAGCCTTC
AP1	seq_ap1_cpdseq_24	TCTGGATGAGTCACTCCCTG	CAGGGAGTGACTCATCCAGA
AP1	seq_ap1_cpdseq_25	ACTGGATGACTCACCTCCCC	GGGGAGGTGAGTCATCCAGT
AP1	seq_ap1_cpdseq_26	GCAGGCTGAGTCACTCCCTG	CAGGGAGTGACTCAGCCTGC
AP1	seq_ap1_cpdseq_27	CAGGGATGACTCATGTCTGC	GCAGACATGAGTCATCCCTG
AP1	seq_ap1_cpdseq_28	TTGGGCTGAGTCATCCCAGG	CCTGGGATGACTCAGCCCAA
AP1	seq_ap1_cpdseq_29	AAGGGGTGAGTCATTCCCTT	AAGGGAATGACTCACCCCTT
AP1	seq_ap1_cpdseq_30	GCGGGGTGAGTCATGATTGT	ACAATCATGACTCACCCCGC
AP1	seq_ap1_cpdseq_31	TGTGGGTGAGTCATACGGTC	GACCGTATGACTCACCCACA
AP1	seq_ap1_cpdseq_32	ACCGGATGACTCACTTCCTT	AAGGAAGTGAGTCATCCGGT
AP1	seq_ap1_cpdseq_33	AATGGATGACTCATTTCCTT	AAGGAAATGAGTCATCCATT
ETS	seq_ets_cpdseq_1	CTTCCGGCGGAAGGGAAAGC	GCTTTCCCTTCCGCCGGAAG
ETS	seq_ets_cpdseq_2	CCGGAAGCGGAAGGGAACCC	GGGTTCCCTTCCGCTTCCGG
ETS	seq_ets_cpdseq_3	ACCAGGGCGGAAGGACATCC	GGATGTCCTTCCGCCCTGGT
ETS	seq_ets_cpdseq_4	GCCCAGTCGGAAGGACATCC	GGATGTCCTTCCGACTGGGC
ETS	seq_ets_cpdseq_5	GCGGAAGCGGAAGGCGGGTA	TACCCGCCTTCCGCTTCCGC
ETS	seq_ets_cpdseq_6	GAGAACCCGGAAGGGGAGGC	GCCTCCCCTTCCGGGTTCTC
ETS	seq_ets_cpdseq_7	TTTCCGCCGGAAGGCGCCCG	CGGGCGCCTTCCGGCGGAAA
ETS	seq_ets_cpdseq_8	CGGGCGCCGGAAGGGGGCGC	GCGCCCCCTTCCGGCGCCCG
ETS	seq_ets_cpdseq_9	GCGGAAACGGAAGGGGTGGG	CCCACCCCTTCCGTTTCCGC
ETS	seq_ets_cpdseq_10	CTGTCCAGGGAAGGGCTTCC	GGAAGCCCTTCCCTGGACAG
ETS	seq_ets_cpdseq_11	GCGGAAGCGGAAGGTTGAAT	ATTCAACCTTCCGCTTCCGC
ETS	seq_ets_cpdseq_12	GAGGAGCCGGAAGGACACCC	GGGTGTCCTTCCGGCTCCTC
ETS	seq_ets_cpdseq_13	GGGAACGCGGAAGGGGCTGG	CCAGCCCCTTCCGCGTTCCC
ETS	seq_ets_cpdseq_14	GAGGGACCGGAAGGGCTGGA	TCCAGCCCTTCCGGTCCCTC
ETS	seq_ets_cpdseq_15	CTTCCGGTGGAAGGGAGCTG	CAGCTCCCTTCCACCGGAAG
ETS	seq_ets_cpdseq_16	CCGGAACTGGAAGGAGTGTA	TACACTCCTTCCAGTTCCGG
ETS	seq_ets_cpdseq_17	ATGAACCCGGAAGGCGGAGC	GCTCCGCCTTCCGGGTTCAT
ETS	seq_ets_cpdseq_18	GAGGAAGCGGAAGGAGCAGG	CCTGCTCCTTCCGCTTCCTC
ETS	seq_ets_cpdseq_19	CTTCCTCCGGAAGGGGCGCT	AGCGCCCCTTCCGGAGGAAG
ETS	seq_ets_cpdseq_20	GAGAAGGAGGAAGGACTTCC	GGAAGTCCTTCCTCCTTCTC
ETS	seq_ets_cpdseq_21	CTTCCGGCGGAAGAAGAAGC	GCTTCTTCTTCCGCCGGAAG
ETS	seq_ets_cpdseq_22	CCGGAAGCGGAAGAAGGGGA	TCCCCTTCTTCCGCTTCCGG
ETS	seq_ets_cpdseq_23	GCGGAAGCGGAAGAGCAGGT	ACCTGCTCTTCCGCTTCCGC
ETS	seq_ets_cpdseq_24	CCGGAAGCGGAAGACTGCCG	CGGCAGTCTTCCGCTTCCGG
ETS	seq_ets_cpdseq_25	CAGGCGCCGGAAGAGGGCTG	CAGCCCTCTTCCGGCGCCTG
ETS	seq_ets_cpdseq_26	CAGGACCCGGAAGAGCGTCC	GGACGCTCTTCCGGGTCCTG
ETS	seq_ets_cpdseq_27	CCGGGACCGGAAGAGGGAGC	GCTCCCTCTTCCGGTCCCGG
ETS	seq_ets_cpdseq_28	GAGGACGCGGAAGAGGAGCT	AGCTCCTCTTCCGCGTCCTC
ETS	seq_ets_cpdseq_29	TGGAACCAGGAAGAGGATGG	CCATCCTCTTCCTGGTTCCA
ETS	seq_ets_cpdseq_30	AAGGCGGCGGAAGAGGAGGT	ACCTCCTCTTCCGCCGCCTT
ETS	seq_ets_cpdseq_31	GTCCAACCGGAAGAATGTCC	GGACATTCTTCCGGTTGGAC
ETS	seq_ets_cpdseq_32	CCGGAAACGGAAGACGACGG	CCGTCGTCTTCCGTTTCCGG
ETS	seq_ets_cpdseq_33	CGGGCGCCGGAAGACGCGCC	GGCGCGTCTTCCGGCGCCCG
ETS	seq_ets_cpdseq_34	AGGAAGCAGGAAGAGGCCAG	CTGGCCTCTTCCTGCTTCCT
ETS	seq_ets_cpdseq_35	GCAAACCCGGAAGACGTGTT	AACACGTCTTCCGGGTTTGC
ETS	seq_ets_cpdseq_36	GGCGATCCGGAAGAGGGCGC	GCGCCCTCTTCCGGATCGCC
ETS	seq_ets_cpdseq_37	TCCAACCCGGAAGAACAGCC	GGCTGTTCTTCCGGGTTGGA
ETS	seq_ets_cpdseq_38	TGGAACCAGGAAGACGCCAG	CTGGCGTCTTCCTGGTTCCA
ETS	seq_ets_cpdseq_39	AGGGGGACGGAAGAGGAAGG	CCTTCCTCTTCCGTCCCCCT
ETS	seq_ets_cpdseq_40	CAGGAACAGGAAGAGCCCGG	CCGGGCTCTTCCTGTTCCTG
ETS	seq_ets_cpdseq_41	CTTCCGCCGGAAGTCAGCCC	GGGCTGACTTCCGGCGGAAG
ETS	seq_ets_cpdseq_42	CTTCCGGCGGAAGTGTGCGA	TCGCACACTTCCGCCGGAAG
ETS	seq_ets_cpdseq_43	GAGCTGCCGGAAGTACATCC	GGATGTACTTCCGGCAGCTC
ETS	seq_ets_cpdseq_44	CCGGAAGCGGAAGTGCCAGC	GCTGGCACTTCCGCTTCCGG
ETS	seq_ets_cpdseq_45	GTTCCGCCGGAAGTGGCCCC	GGGGCCACTTCCGGCGGAAC
ETS	seq_ets_cpdseq_46	CTTCCGCCGGAAGCGGGGCG	CGCCCCGCTTCCGGCGGAAG
ETS	seq_ets_cpdseq_47	CCGGAACCGGAAGTGGTTGT	ACAACCACTTCCGGTTCCGG
ETS	seq_ets_cpdseq_48	CTTCCGGCGGAAGCGGCCTC	GAGGCCGCTTCCGCCGGAAG
ETS	seq_ets_cpdseq_49	CCGGAAGCGGAAGCGCGCTT	AAGCGCGCTTCCGCTTCCGG
ETS	seq_ets_cpdseq_50	CTTCCGGCGGAAGTTACCGC	GCGGTAACTTCCGCCGGAAG
ETS	seq_ets_cpdseq_51	CCGGAACCGGAAGCGATCGC	GCGATCGCTTCCGGTTCCGG
ETS	seq_ets_cpdseq_52	CCGGAAGCGGAAGTAGATTC	GAATCTACTTCCGCTTCCGG
ETS	seq_ets_cpdseq_53	CTTCCGGCGGAACTGCGGGT	ACCCGCAGTTCCGCCGGAAG
ETS	seq_ets_cpdseq_54	CTTCCGGCGGAAGCTGGGAT	ATCCCAGCTTCCGCCGGAAG
ETS	seq_ets_cpdseq_55	CTTCCGCCGGAAGCTCGGTT	AACCGAGCTTCCGGCGGAAG
ETS	seq_ets_cpdseq_56	CCGGAAGCGGAAGTCCAGGA	TCCTGGACTTCCGCTTCCGG
ETS	seq_ets_cpdseq_57	CCGGAACCGGAAGTCCGCTG	CAGCGGACTTCCGGTTCCGG
ETS	seq_ets_cpdseq_58	CTTCCGCCGGAAATGCTCCA	TGGAGCATTTCCGGCGGAAG
ETS	seq_ets_cpdseq_59	CCGGAAGCGGAAGCCCCGCC	GGCGGGGCTTCCGCTTCCGG
ETS	seq_ets_cpdseq_60	CCGGAACCGGAAGCCTCGAG	CTCGAGGCTTCCGGTTCCGG
NFY	seq_nfy_cpdseq_1	GTCCCAGCCAATCAGAGGCC	GGCCTCTGATTGGCTGGGAC
NFY	seq_nfy_cpdseq_2	CGGCCGGCCAATCAGAGACG	CGTCTCTGATTGGCCGGCCG
NFY	seq_nfy_cpdseq_3	AACCGGACCAATCAGCGGCC	GGCCGCTGATTGGTCCGGTT
NFY	seq_nfy_cpdseq_4	TCCCCAACCAATCAGAGGCA	TGCCTCTGATTGGTTGGGGA
NFY	seq_nfy_cpdseq_5	CTACCAGCCAATGAGAGCAC	GTGCTCTCATTGGCTGGTAG
NFY	seq_nfy_cpdseq_6	CTGCTGGCCAATCACAGAGC	GCTCTGTGATTGGCCAGCAG
NFY	seq_nfy_cpdseq_7	ATCTCAGCCAATCGGAGCTA	TAGCTCCGATTGGCTGAGAT
NFY	seq_nfy_cpdseq_8	CGTCCGGCCAATCGGAGGGC	GCCCTCCGATTGGCCGGACG
NFY	seq_nfy_cpdseq_9	GCCCAGGCCAATCAAAGGAA	TTCCTTTGATTGGCCTGGGC
NFY	seq_nfy_cpdseq_10	AAACCGGCCAATGAGAGGAG	CTCCTCTCATTGGCCGGTTT
NFY	seq_nfy_cpdseq_11	GGGCAGACCAATCACAGGCC	GGCCTGTGATTGGTCTGCCC
NFY	seq_nfy_cpdseq_12	CTGCCAGCCAATCACAGCCA	TGGCTGTGATTGGCTGGCAG
NFY	seq_nfy_cpdseq_13	AGCCCAGCCAATCAAAGCTA	TAGCTTTGATTGGCTGGGCT
NFY	seq_nfy_cpdseq_14	ACTTCGACCAATCAAAGGGC	GCCCTTTGATTGGTCGAAGT
NFY	seq_nfy_cpdseq_15	GGCCCCGCCAATCAGCGCGC	GCGCGCTGATTGGCGGGGCC
NFY	seq_nfy_cpdseq_16	ACACGGACCAATCGGCGGCG	CGCCGCCGATTGGTCCGTGT
NFY	seq_nfy_cpdseq_17	CCCACAGCCAATGGGAGCCT	AGGCTCCCATTGGCTGTGGG
NFY	seq_nfy_cpdseq_18	AAACGGACCAATGAGTGATC	GATCACTCATTGGTCCGTTT
NFY	seq_nfy_cpdseq_19	GAATGCACCAATCAGAGCGC	GCGCTCTGATTGGTGCATTC
NFY	seq_nfy_cpdseq_20	ATCTCGGCCAATGGGAGGCG	CGCCTCCCATTGGCCGAGAT
NFY	seq_nfy_cpdseq_21	CCCACAGCCAATGGGAGCCT	AGGCTCCCATTGGCTGTGGG
NFY	seq_nfy_cpdseq_22	ATCTCGGCCAATGGGAGGCG	CGCCTCCCATTGGCCGAGAT
NFY	seq_nfy_cpdseq_23	GCACGGACCAATGGGCTCGT	ACGAGCCCATTGGTCCGTGC
NFY	seq_nfy_cpdseq_24	GCCGCAACCAATGGGAGGCC	GGCCTCCCATTGGTTGCGGC
NFY	seq_nfy_cpdseq_25	GCAACAGCCAATGGCAGTGG	CCACTGCCATTGGCTGTTGC
NFY	seq_nfy_cpdseq_26	AGCGCGGCCAATGGCAGCGG	CCGCTGCCATTGGCCGCGCT
NFY	seq_nfy_cpdseq_27	TCGCCAGCCAATGGAAGCGG	CCGCTTCCATTGGCTGGCGA
NFY	seq_nfy_cpdseq_28	CCCCCGGCCAATGGAAACTC	GAGTTTCCATTGGCCGGGGG
NFY	seq_nfy_cpdseq_29	GCGCCCGCCAATGGGAACGC	GCGTTCCCATTGGCGGGCGC
NFY	seq_nfy_cpdseq_30	AAATCCACCAATGGGCACAC	GTGTGCCCATTGGTGGATTT
NFY	seq_nfy_cpdseq_31	ACCTCGTCCAATGGGAGGCT	AGCCTCCCATTGGACGAGGT
NFY	seq_nfy_cpdseq_32	TCGCCATCCAATGGGAACCT	AGGTTCCCATTGGATGGCGA
NFY	seq_nfy_cpdseq_33	CCGACACCCAATGGGAGTGA	TCACTCCCATTGGGTGTCGG
NFY	seq_nfy_cpdseq_34	CCAGCGACCAATGGCAGCGG	CCGCTGCCATTGGTCGCTGG
NFY	seq_nfy_cpdseq_35	GCACCGCCCAATGGGAGGTG	CACCTCCCATTGGGCGGTGC
NFY	seq_nfy_cpdseq_36	CTCTCAACCAATGGAAGACA	TGTCTTCCATTGGTTGAGAG
NFY	seq_nfy_cpdseq_37	TCTCCAGTCAATGGGAGGGA	TCCCTCCCATTGACTGGAGA
NFY	seq_nfy_cpdseq_38	TATCCTGCCAATGGGAGTAT	ATACTCCCATTGGCAGGATA
NFY	seq_nfy_cpdseq_39	GGACTGACCAATGGAAGCAG	CTGCTTCCATTGGTCAGTCC
NFY	seq_nfy_cpdseq_40	GCGCCCGCCAATGGCAGGGC	GCCCTGCCATTGGCGGGCGC
NFY	seq_nfy_cpdseq_41	CTACCAGCCAATGAGAGCAC	GTGCTCTCATTGGCTGGTAG
NFY	seq_nfy_cpdseq_42	AAACCGGCCAATGAGAGGAG	CTCCTCTCATTGGCCGGTTT
NFY	seq_nfy_cpdseq_43	AAACGGACCAATGAGTGATC	GATCACTCATTGGTCCGTTT
NFY	seq_nfy_cpdseq_44	CCTCCAACCAATGAGAGGGG	CCCCTCTCATTGGTTGGAGG
NFY	seq_nfy_cpdseq_45	CCTCCCGCCAATGAGAGCTG	CAGCTCTCATTGGCGGGAGG
NFY	seq_nfy_cpdseq_46	CTCCCAGCCAATGACAGGCC	GGCCTGTCATTGGCTGGGAG
NFY	seq_nfy_cpdseq_47	ACACCAGCCAATGAAAGCAG	CTGCTTTCATTGGCTGGTGT
NFY	seq_nfy_cpdseq_48	GAGCCGGCCAATGACAGGCA	TGCCTGTCATTGGCCGGCTC
NFY	seq_nfy_cpdseq_49	AACTGCACCAATGAGGGTAA	TTACCCTCATTGGTGCAGTT
NFY	seq_nfy_cpdseq_50	TTTCCATCCAATGAGAGAAA	TTTCTCTCATTGGATGGAAA
NFY	seq_nfy_cpdseq_51	GTTCTGGCCAATGAAAGATA	TATCTTTCATTGGCCAGAAC
NFY	seq_nfy_cpdseq_52	CCTCCCGCCAATGAACGGGT	ACCCGTTCATTGGCGGGAGG
NFY	seq_nfy_cpdseq_53	CGGCCGTCCAATGAGAAGGC	GCCTTCTCATTGGACGGCCG
NFY	seq_nfy_cpdseq_54	CTGGTGACCAATGACAGGCA	TGCCTGTCATTGGTCACCAG
NFY	seq_nfy_cpdseq_55	TGGTCAACCAATGACAGGTT	AACCTGTCATTGGTTGACCA
NFY	seq_nfy_cpdseq_56	GGGCCCGCCAATGACAGCAT	ATGCTGTCATTGGCGGGCCC
NFY	seq_nfy_cpdseq_57	TTCTCACCCAATGAGAGGGT	ACCCTCTCATTGGGTGAGAA
NFY	seq_nfy_cpdseq_58	ATTAGGACCAATGAAAGCAA	TTGCTTTCATTGGTCCTAAT
NFY	seq_nfy_cpdseq_59	ACGGCGCCCAATGAGCGGCC	GGCCGCTCATTGGGCGCCGT
NFY	seq_nfy_cpdseq_60	GAAGCTGCCAATGAGAGAGC	GCTCTCTCATTGGCAGCTTC
TBP	seq_tata_cpdseq_1	ACGCGCTATAAAAGGCGCGG	CCGCGCCTTTTATAGCGCGT
TBP	seq_tata_cpdseq_2	GAACTGTATAAAAGCGCCGG	CCGGCGCTTTTATACAGTTC
TBP	seq_tata_cpdseq_3	AGCAGCTATAAAAAGCGGCG	CGCCGCTTTTTATAGCTGCT
TBP	seq_tata_cpdseq_4	AGTCAGTATAAAAGGGGGGA	TCCCCCCTTTTATACTGACT
TBP	seq_tata_cpdseq_5	CGCTGCTATAAATAGGGCGG	CCGCCCTATTTATAGCAGCG
TBP	seq_tata_cpdseq_6	GCGGGGTATAAAGGGGGCGG	CCGCCCCCTTTATACCCCGC
TBP	seq_tata_cpdseq_7	TGTGCCTATAAAAACCCGGA	TCCGGGTTTTTATAGGCACA
TBP	seq_tata_cpdseq_8	AAAGTCTATAAAAGCCAGCC	GGCTGGCTTTTATAGACTTT
TBP	seq_tata_cpdseq_9	GCGCGCTATAAAGGGCCGGC	GCCGGCCCTTTATAGCGCGC
TBP	seq_tata_cpdseq_10	GGCGGGTATAAATGGAGCGG	CCGCTCCATTTATACCCGCC
TBP	seq_tata_cpdseq_11	TCCTTGTATAAAGGCCGCGC	GCGCGGCCTTTATACAAGGA
TBP	seq_tata_cpdseq_12	GCAGAGTATAAAACCCGCGC	GCGCGGGTTTTATACTCTGC
TBP	seq_tata_cpdseq_13	TCTCCATATAAAAGCGGCGC	GCGCCGCTTTTATATGGAGA
TBP	seq_tata_cpdseq_14	TTGCTGTATAAATGCGGTGG	CCACCGCATTTATACAGCAA
TBP	seq_tata_cpdseq_15	TGATCCTATAAATACCCAGG	CCTGGGTATTTATAGGATCA
TBP	seq_tata_cpdseq_16	GGGAAGTATAAAAAGAGCCC	GGGCTCTTTTTATACTTCCC
TBP	seq_tata_cpdseq_17	GTTCAATATAAAAAGCCGGC	GCCGGCTTTTTATATTGAAC
TBP	seq_tata_cpdseq_18	CTCGTATATAAAAGGGCCCC	GGGGCCCTTTTATATACGAG
TBP	seq_tata_cpdseq_19	GCCAGGTATAAATAGGCTGG	CCAGCCTATTTATACCTGGC
TBP	seq_tata_cpdseq_20	CTGCTGTTTAAAAGGCCGGG	CCCGGCCTTTTAAACAGCAG
LEF1	seq_tcf_lef_cpdseq_1	GGAAAAAGATCAAAGGTTTT	AAAACCTTTGATCTTTTTCC
LEF1	seq_tcf_lef_cpdseq_2	AAAGAAACATCAAAGGAAAG	CTTTCCTTTGATGTTTCTTT
LEF1	seq_tcf_lef_cpdseq_3	GGGACCACATCAAAGGAGTA	TACTCCTTTGATGTGGTCCC
LEF1	seq_tcf_lef_cpdseq_4	CACCAGAGATCAAAGAGATG	CATCTCTTTGATCTCTGGTG
LEF1	seq_tcf_lef_cpdseq_5	TGACAAAGATGAAAGGGAAA	TTTCCCTTTCATCTTTGTCA
LEF1	seq_tcf_lef_cpdseq_6	TAAAAGACATCAAAGGAATG	CATTCCTTTGATGTCTTTTA
LEF1	seq_tcf_lef_cpdseq_7	CTAACCACTTCAAAGGCCTC	GAGGCCTTTGAAGTGGTTAG
LEF1	seq_tcf_lef_cpdseq_8	AGCTCCAGATCAAAGGCAGC	GCTGCCTTTGATCTGGAGCT
LEF1	seq_tcf_lef_cpdseq_9	CTCCAAAGGTCAAAGGCTAG	CTAGCCTTTGACCTTTGGAG
LEF1	seq_tcf_lef_cpdseq_10	CAACAAAGTTCAAAGGACCA	TGGTCCTTTGAACTTTGTTG
LEF1	seq_tcf_lef_cpdseq_11	GAGAAAAGAGCAAAGGGAAA	TTTCCCTTTGCTCTTTTCTC
LEF1	seq_tcf_lef_cpdseq_12	AAACCCACATGAAAGAGAAG	CTTCTCTTTCATGTGGGTTT
LEF1	seq_tcf_lef_cpdseq_13	CAGAAAAGATCAAACGCGCG	CGCGCGTTTGATCTTTTCTG
LEF1	seq_tcf_lef_cpdseq_14	GTGCAAAGACCAAAGGGAGG	CCTCCCTTTGGTCTTTGCAC
LEF1	seq_tcf_lef_cpdseq_15	TCTGGGAGTTCAAAGGAAAA	TTTTCCTTTGAACTCCCAGA
LEF1	seq_tcf_lef_cpdseq_16	GCCACCGGATCAAAGGCGCC	GGCGCCTTTGATCCGGTGGC
LEF1	seq_tcf_lef_cpdseq_17	GTTTGAACTTCAAAGGGCTG	CAGCCCTTTGAAGTTCAAAC
LEF1	seq_tcf_lef_cpdseq_18	CACCGCAGTTCAAAGGCAGG	CCTGCCTTTGAACTGCGGTG
LEF1	seq_tcf_lef_cpdseq_19	GGGCCCACAACAAAGGGCAA	TTGCCCTTTGTTGTGGGCCC
LEF1	seq_tcf_lef_cpdseq_20	TCACCCCCATCAAAGGGGCA	TGCCCCTTTGATGGGGGTGA

## Sheet: 2_AF3_protein_input
TF	protein_chain	UniProt_ID	sequence
AP1	1	P01100	EEKRRIRRERNKMAAAKCRNRRRELTDTLQAETDQLEDEKSALQTEIANLLKEKEKLEFILAAH
AP1	2	P05412	RIKAERKRMRNRIAASKCRKRKLERIARLEEKVKTLKAQNSELASTANMLREQVAQLKQKVMNH
ETS	1	P14921-1	MKAAVDLKPTLTIIKTEKVDLELFPSPDMECADVPLLTPSSKEMMSQALKATFSGFTKEQQRLGIPKDPRQWTETHVRDWVMWAVNEFSLKGVDFQKFCMNGAALCALGKDCFLELAPDFVGDILWEHLEILQKEDVKPYQVNGVNPAYPESRYTSDYFISYGIEHAQCVPPSEFSEPSFITESYQTLHPISSEELLSLKYENDYPSVILRDPLQTDTLQNDYFAIKQEVVTPDNMCMGRTSRGKLGGQDSFESIESYDSCDRLTQSWSSQSSFNSLQRVPSYDSFDSEDYPAALPNHKPKGTFKDYVRDRADLNKDKPVIPAAALAGYTGSGPIQLWQFLLELLTDKSCQSFISWTGDGWEFKLSDPDEVARRWGKRKNKPKMNYEKLSRGLRYYYDK…
NFY	1	P23511-1	MEQYTANSNSSTEQIVVQAGQIQQQQQGGVTAVQLQTEAQVASASGQQVQTLQVVQGQPLMVQVSGGQLITSTGQPIMVQAVPGGQGQTIMQVPVSGTQGLQQIQLVPPGQIQIQGGQAVQVQGQQGQTQQIIIQQPQTAVTAGQTQTQQQIAVQGQQVAQTAEGQTIVYQPVNADGTILQQVTVPVSGMITIPAASLAGAQIVQTGANTNTTSSGQGTVTVTLPVAGNVVNSGGMVMMVPGAGSVPAIQRIPLPGAEMLEEEPLYVNAKQYHRILKRRQARAKLEAEGKIPKERRKYLHESRHRHAMARKRGEGGRFFSPKEKDSPHMQDPNQADEEAMTQIIRVS
NFY	2	P25208	MTMDGDSSTTDASQLGISADYIGGSHYVIQPHDDTEDSMNDHEDTNGSKESFREQDIYLPIANVARIMKNAIPQTGKIAKDAKECVQECVSEFISFITSEASERCHQEKRKTINGEDILFAMSTLGFDSYVEPLKLYLQKFREAMKGEKGIGGAVTATDGLSEELTEEAFTNQLPAGLITTDGQQQNVMVYTTSYQQISGVQQIQFS
NFY	3	Q13952-1	MSTEGGFGGTSSSDAQQSLQSFWPRVMEEIRNLTVKDFRVQELPLARIKKIMKLDEDVKMISAEAPVLFAKAAQIFITELTLRAWIHTEDNKRRTLQRNDIAMAITKFDQFDFLIDIVPRDELKPPKRQEEVRQSVTPAEPVQYYFTLAQQPTAVQVQGQQQGQQTTSSTTTIQPGQIIIAQPQQGQTTPVTMQVGEGQQVQIVQAQPQGQAQQAQSGTGQTMQVMQQIITNTGEIQQIPVQLNAGQLQYIRLAQPVSGTQVVQGQIQTLATNAQQGQRNASQGKPRRCLKETLQITQTEVQQGQQQFSQFTDGQRNSVQQARVSELTGEAEPREVKATGNSTPCTSSLPTTHPPSHRAGASCVCCSQPQQSSTSPPPSDALQWVVVEVSGTPNQLETH…
TBP	1	P20226	SGIVPQLQNIVSTVNLGCKLDLKTIALRARNAEYNPKRFAAVIMRIREPRTTALIFSSGKMVCTGAKSEENSRLAARKYARVVQKLGFPAKFLDFKIQNMVGSCDVKFPIRLEGLVLTHQQFSSYEPELFPGLIYRMIKPRIVLLIFVSGKVVLTGAKVRAEIYEAFENIYPILKGFRK
LEF1	1	Q9UJU2	PHIKKPLNAFMLYMKEMRANVVAECTLKESAINQILGRRWHALSREEQAKYYELARKERQLHMQLYPGWSARDNYGKKKKRKREK

## Sheet: 3_TF_bound_DNA_measurements
TF	run_name	chain	position	step	d22_distance	ring_stacking_overlap_area	bp_shift	pseudorotation_angle	sugar_pucker	interbase_angle	bp_slide	d64_distance	interbase_dihedral_angle	pyrimidine_marker
AP1	seq_1	D	-5.5	C-T	4.30976	0.9	-0.25	153.2	C2'-endo	5	-0.16	not measured	39.431	T
AP1	seq_1	D	-4.5	T-C	4.18555	0.7	-0.02	147.1	C2'-endo	1	-0.18	not measured	35.1656	C
AP1	seq_1	D	-1.5	T-C	4.36121	0.6	0.32	147.1	C2'-endo	8	-0.05	not measured	30.1653	C
AP1	seq_1	D	-0.5	C-T	3.98501	2.1	-0.96	117.7	C1'-exo	6	-0.25	not measured	42.7934	T
AP1	seq_1	C	1.5	T-C	4.42638	0.3	-0.52	108.8	C1'-exo	8	-0.22	not measured	26.8579	T
AP1	seq_1	D	5.5	T-C	4.28953	1.2	-0.39	135.6	C1'-exo	7	0.38	not measured	38.1313	C
AP1	seq_1	D	6.5	C-T	4.37133	0.5	0.25	155.9	C2'-endo	5	-0.11	not measured	37.8788	T
AP1	seq_1	D	7.5	T-C	4.22349	0.7	-0.32	144.6	C2'-endo	3	-0.03	not measured	36.9006	C
AP1	seq_1	D	8.5	T-T	4.22131	1	-0.28	150.4	C2'-endo	4	-0.35	not measured	37.8285	T
AP1	seq_1	D	9.5	T-T	4.64623	0.6	0.02	148.4	C2'-endo	10	0.11	not measured	40.41	T
AP1	seq_10	D	-8.5	T-T	4.21584	0.9	-0.17	152.7	C2'-endo	8	-0.07	not measured	36.8769	T
AP1	seq_10	D	-5.5	C-T	4.17916	1.4	-0.45	157.3	C2'-endo	8	0.05	not measured	40.9396	T
AP1	seq_10	D	-4.5	T-C	4.18603	0.7	-0.04	151.1	C2'-endo	1	-0.16	not measured	35.5629	C
AP1	seq_10	D	-1.5	T-C	4.39787	0.6	0.31	147.9	C2'-endo	8	0.06	not measured	31.5716	C
AP1	seq_10	D	-0.5	C-T	4.01304	2	-0.9	120.6	C1'-exo	6	-0.25	not measured	42.7149	T
AP1	seq_10	C	1.5	T-C	4.46451	0.4	-0.42	104.2	O4'-endo	9	-0.04	not measured	30.1285	T
AP1	seq_10	C	4.5	C-T	4.4494	0.4	-0.04	114.9	C1'-exo	5	-0.43	not measured	36.4024	C
AP1	seq_10	C	5.5	T-C	4.16117	1.1	0.4	155.9	C2'-endo	4	-0.23	not measured	37.54	T
AP1	seq_10	C	6.5	C-C	4.19476	1	0.38	149.3	C2'-endo	7	0.17	not measured	39.6004	C
AP1	seq_10	C	7.5	C-C	4.31994	0.3	-0.26	143.4	C1'-exo	4	-0.1	not measured	35.9431	C
AP1	seq_10	C	8.5	C-T	4.43126	0.5	-0.43	152.8	C2'-endo	5	-0.03	not measured	39.2301	C
AP1	seq_10	C	9.5	T-C	4.28622	1.2	0.5	149.9	C2'-endo	5	0.35	not measured	42.9786	T
AP1	seq_11	D	-8.5	C-T	4.54644	0.1	0.81	152.2	C2'-endo	8	-0.04	not measured	32.378	T
AP1	seq_11	D	-7.5	C-C	4.42796	0.5	-0.13	152.1	C2'-endo	4	0.31	not measured	39.5381	C
AP1	seq_11	D	-6.5	T-C	4.26811	1.1	-0.28	190.4	C3'-exo	6	0	not measured	37.2051	C
AP1	seq_11	D	-5.5	C-T	4.32723	0.8	-0.05	157.4	C2'-endo	7	-0.19	not measured	37.241	T
AP1	seq_11	D	-4.5	T-C	4.26287	0.6	-0.11	137	C1'-exo	3	-0.27	not measured	35.3866	C
AP1	seq_11	D	-1.5	T-C	4.40862	0.5	0.34	145.1	C2'-endo	8	-0.12	not measured	30.0636	C
AP1	seq_11	C	0.5	C-T	3.92774	2.2	0.98	146.5	C2'-endo	6	-0.28	not measured	43.1493	C
AP1	seq_11	C	1.5	T-C	4.38551	0.5	-0.37	118.4	C1'-exo	9	-0.01	not measured	29.548	T
AP1	seq_11	C	4.5	C-C	4.22941	0.1	0.09	135.9	C1'-exo	7	-0.68	not measured	38.3186	C
AP1	seq_11	C	5.5	C-T	4.39271	0.5	-0.16	196	C3'-exo	5	-0.21	not measured	32.944	C
AP1	seq_11	C	6.5	T-C	4.13749	1.3	0.43	157.5	C2'-endo	6	0.03	not measured	36.6943	T
AP1	seq_11	C	7.5	C-C	4.26661	0.4	-0.14	148	C2'-endo	4	-0.14	not measured	38.0175	C
AP1	seq_11	C	8.5	C-T	4.39649	0.5	-0.28	149.2	C2'-endo	5	-0.34	not measured	36.1055	C
AP1	seq_11	C	9.5	T-C	4.22295	1.2	0.63	155.1	C2'-endo	5	0.26	not measured	40.3824	T
AP1	seq_12	C	-8.5	C-T	4.52271	0.5	-0.04	157.5	C2'-endo	5	-0.11	not measured	42.7243	C
AP1	seq_12	C	-7.5	T-T	4.2152	1.3	0.27	149.4	C2'-endo	8	0.07	not measured	40.0268	T
AP1	seq_12	D	-5.5	C-C	4.17282	1.5	-0.67	147.2	C2'-endo	9	0.07	not measured	37.313	C
AP1	seq_12	D	-4.5	C-C	4.24593	0.5	-0.12	149.9	C2'-endo	5	-0.24	not measured	36.4866	C
AP1	seq_12	D	-1.5	T-C	4.41816	0.4	0.44	150.7	C2'-endo	9	0.02	not measured	29.255	C
AP1	seq_12	D	-0.5	C-T	3.94245	2.1	-0.93	112.7	C1'-exo	6	-0.28	not measured	43.3482	T
AP1	seq_12	C	1.5	T-C	4.45782	0.4	-0.42	107.3	O4'-endo	8	-0.07	not measured	30.3111	T
AP1	seq_12	C	4.5	C-T	4.40549	0.4	0	119.7	C1'-exo	4	-0.51	not measured	36.5929	C
AP1	seq_12	C	5.5	T-C	4.13065	1.4	0.47	153.1	C2'-endo	8	0.03	not measured	34.0103	T
AP1	seq_12	C	8.5	C-C	4.30648	1.4	0.45	139.2	C1'-exo	8	0.57	not measured	41.6131	C
AP1	seq_13	D	-5.5	C-C	4.21001	1.3	-0.55	150.9	C2'-endo	8	-0.02	not measured	37.625	C
AP1	seq_13	D	-4.5	C-C	4.24634	0.5	-0.1	148.6	C2'-endo	5	-0.35	not measured	36.0131	C
AP1	seq_13	D	-1.5	T-C	4.39253	0.7	0.35	150.1	C2'-endo	9	0.07	not measured	29.6796	C
AP1	seq_13	D	-0.5	C-T	3.95604	2.2	-0.97	116.7	C1'-exo	6	-0.27	not measured	43.6051	T
AP1	seq_13	C	1.5	T-C	4.40594	0.5	-0.43	111.1	C1'-exo	8	-0.11	not measured	29.6595	T
AP1	seq_13	D	5.5	C-T	4.59576	0.3	0.51	161	C2'-endo	8	0.11	not measured	37.6177	T
AP1	seq_13	D	6.5	C-C	4.10206	0.6	-0.08	96	O4'-endo	5	-0.22	not measured	35.6754	C
AP1	seq_14	D	-8.5	C-C	4.42107	0.8	-0.07	153.1	C2'-endo	9	0.56	not measured	35.9911	C
AP1	seq_14	D	-7.5	T-C	4.20736	0.9	-0.29	136.9	C1'-exo	5	-0.05	not measured	33.5712	C
AP1	seq_14	D	-6.5	C-T	4.36975	0.6	0.3	147.4	C2'-endo	5	-0.25	not measured	33.9502	T
AP1	seq_14	D	-5.5	C-C	4.0956	0.9	-0.54	141.2	C1'-exo	6	-0.35	not measured	36.0678	C
AP1	seq_14	D	-4.5	C-C	4.24282	0.4	-0.08	150.5	C2'-endo	4	-0.47	not measured	36.1997	C
AP1	seq_14	D	-1.5	T-C	4.39061	0.5	0.39	148.1	C2'-endo	8	0.03	not measured	30.2979	C
AP1	seq_14	D	-0.5	C-T	3.94723	2.1	-0.94	116.1	C1'-exo	6	-0.27	not measured	42.7671	T
AP1	seq_14	C	1.5	T-C	4.45066	0.3	-0.43	110.5	C1'-exo	7	-0.18	not measured	29.6794	T
AP1	seq_14	C	6.5	C-C	4.17855	1.3	0.53	143.5	C1'-exo	7	-0.05	not measured	38.3125	C
AP1	seq_14	D	8.5	T-T	4.29569	1.2	-0.39	148	C2'-endo	6	0.17	not measured	41.6075	T
AP1	seq_14	D	9.5	T-T	4.47687	0.8	-0.08	144	C2'-endo	9	0.11	not measured	38.965	T
AP1	seq_15	C	-7.5	T-T	4.12978	1.1	0.18	186.4	C3'-exo	5	-0.14	not measured	35.4278	T
AP1	seq_15	C	-4.5	T-C	4.38042	0.5	0.14	132.7	C1'-exo	2	-0.12	not measured	40.8188	T
AP1	seq_15	C	-3.5	C-T	4.16812	1.2	0.05	157	C2'-endo	6	-0.18	not measured	34.5033	C
AP1	seq_15	D	-1.5	T-C	4.39629	0.4	0.47	148	C2'-endo	10	-0.04	not measured	27.1244	C
AP1	seq_15	C	0.5	C-T	3.95838	2.2	0.99	140.5	C1'-exo	6	-0.21	not measured	44.1834	C
AP1	seq_15	C	1.5	T-C	4.36401	0.6	-0.37	113.5	C1'-exo	9	0	not measured	29.0069	T
AP1	seq_15	C	4.5	T-C	4.19771	0.8	0.16	122.2	C1'-exo	6	-0.08	not measured	33.6443	T
AP1	seq_15	C	5.5	C-C	4.01055	1.6	0.85	125.1	C1'-exo	11	0.03	not measured	37.4455	C
AP1	seq_15	C	6.5	C-C	4.24237	0.8	-0.22	139.9	C1'-exo	5	-0.15	not measured	35.4562	C
AP1	seq_15	C	7.5	C-C	4.20535	0.6	-0.02	152.7	C2'-endo	2	-0.16	not measured	37.0917	C
AP1	seq_15	C	8.5	C-T	4.51358	0.3	-0.37	154.1	C2'-endo	4	0.01	not measured	37.8189	C
AP1	seq_16	D	-7.5	C-C	4.3395	0.6	-0.1	155.9	C2'-endo	6	-0.11	not measured	35.0745	C
AP1	seq_16	C	-5.5	C-C	4.28251	0.5	0	144.5	C2'-endo	4	-0.21	not measured	40.0929	C
AP1	seq_16	D	-1.5	T-C	4.4612	0.3	0.48	144.9	C2'-endo	7	-0.15	not measured	28.6846	C
AP1	seq_16	C	0.5	C-T	3.94024	2.2	0.96	144.6	C2'-endo	6	-0.23	not measured	42.9755	C
AP1	seq_16	C	1.5	T-C	4.38884	0.6	-0.35	114.2	C1'-exo	9	0.05	not measured	29.9529	T
AP1	seq_16	C	4.5	C-C	4.19039	0.4	0.06	124.6	C1'-exo	7	-0.51	not measured	33.24	C
AP1	seq_16	C	5.5	C-C	4.15242	0.9	0.5	146.8	C2'-endo	7	-0.32	not measured	34.2147	C
AP1	seq_16	C	6.5	C-C	4.19419	1	0.08	149.7	C2'-endo	5	-0.21	not measured	37.2875	C
AP1	seq_16	C	7.5	C-C	4.23986	0.6	-0.08	154.9	C2'-endo	2	-0.08	not measured	33.6431	C
AP1	seq_16	C	8.5	C-T	4.81555	0.1	-0.45	185.7	C3'-exo	6	-0.13	not measured	44.0108	C
AP1	seq_16	C	9.5	T-T	4.43474	0.7	0.01	156.9	C2'-endo	7	0.32	not measured	41.7905	T
AP1	seq_17	C	-7.5	T-C	4.16797	1.2	0.52	138.6	C1'-exo	4	0.04	not measured	39.8839	T
AP1	seq_17	C	-6.5	C-C	4.17749	1.2	0.26	151.9	C2'-endo	12	0.3	not measured	38.1984	C
AP1	seq_17	C	-5.5	C-C	4.63909	0	-0.33	187.7	C3'-exo	1	0.7	not measured	43.7539	C
AP1	seq_17	D	-1.5	T-C	4.45332	0.3	0.47	145.6	C2'-endo	8	-0.09	not measured	28.6616	C
AP1	seq_17	C	0.5	C-T	3.9884	2.1	0.95	144.2	C2'-endo	6	-0.22	not measured	43.3516	C
AP1	seq_17	C	1.5	T-C	4.37016	0.6	-0.35	115.1	C1'-exo	9	0	not measured	30.0876	T
AP1	seq_17	C	4.5	T-C	4.20144	0.8	0.19	120.5	C1'-exo	6	-0.09	not measured	34.5954	T
AP1	seq_17	C	5.5	C-C	4.03734	1.6	0.85	134.2	C1'-exo	11	0.1	not measured	38.3616	C
AP1	seq_17	C	6.5	C-C	4.30855	0.6	-0.25	142.4	C1'-exo	4	-0.15	not measured	35.1151	C
AP1	seq_17	C	7.5	C-C	4.18263	0.8	0.09	156.5	C2'-endo	2	-0.09	not measured	37.4726	C
AP1	seq_17	C	8.5	C-T	4.60352	0.2	-0.43	152.2	C2'-endo	5	-0.04	not measured	40.0012	C
AP1	seq_18	C	-7.5	C-T	4.33021	0.6	-0.21	151.7	C2'-endo	5	-0.37	not measured	34.7106	C
AP1	seq_18	C	-6.5	T-C	4.05417	1.1	0.32	154.2	C2'-endo	5	-0.07	not measured	37.065	T
AP1	seq_18	C	-5.5	C-T	4.44599	0.4	-0.37	122.5	C1'-exo	7	-0.08	not measured	38.2984	C
AP1	seq_18	C	-4.5	T-C	4.2539	0.7	0.4	162	C2'-endo	1	-0.15	not measured	42.6615	T
AP1	seq_18	C	-3.5	C-T	4.10229	1.2	0.02	156.6	C2'-endo	7	-0.2	not measured	33.5177	C
AP1	seq_18	D	-1.5	T-C	4.35499	0.7	0.32	148.6	C2'-endo	11	0.19	not measured	29.3279	C
AP1	seq_18	D	-0.5	C-T	3.97631	1.9	-0.93	110.9	C1'-exo	6	-0.3	not measured	43.5023	T
AP1	seq_18	C	1.5	T-C	4.47207	0.4	-0.38	108.3	C1'-exo	8	-0.03	not measured	30.3323	T
AP1	seq_18	C	4.5	C-T	4.38884	0.5	0.01	121.8	C1'-exo	5	-0.53	not measured	36.3219	C
AP1	seq_18	C	5.5	T-C	4.201	0.9	0.34	155.8	C2'-endo	4	-0.28	not measured	36.584	T
AP1	seq_18	C	6.5	C-C	4.12512	1.3	0.39	150.5	C2'-endo	6	-0.01	not measured	36.5932	C
AP1	seq_18	C	7.5	C-C	4.42903	0.3	-0.18	149.2	C2'-endo	1	0.07	not measured	39.026	C
AP1	seq_18	C	8.5	C-T	4.72175	0.1	-0.8	151.7	C2'-endo	6	-0.07	not measured	36.4514	C
AP1	seq_19	C	-8.5	T-C	4.50367	1.2	0.5	157.6	C2'-endo	9	0.5	not measured	40.4465	T
AP1	seq_19	C	-5.5	T-T	4.25448	0.8	0.02	123.5	C1'-exo	5	-0.36	not measured	36.6154	T
AP1	seq_19	C	-4.5	T-C	4.27096	0.5	0.09	141	C1'-exo	2	-0.19	not measured	39.6813	T
AP1	seq_19	C	-3.5	C-T	4.12383	1.3	0.13	155.5	C2'-endo	7	-0.08	not measured	34.5392	C
AP1	seq_19	D	-1.5	T-C	4.37154	0.7	0.37	146.4	C2'-endo	12	0.18	not measured	29.111	C
AP1	seq_19	D	-0.5	C-T	3.97743	2	-0.97	96.7	O4'-endo	5	-0.24	not measured	43.8472	T
AP1	seq_19	C	1.5	T-C	4.43434	0.5	-0.43	98.4	O4'-endo	10	-0.08	not measured	27.3256	T
AP1	seq_19	C	4.5	T-T	4.2061	1	0.16	116.4	C1'-exo	7	-0.37	not measured	35.7152	T
AP1	seq_19	C	5.5	T-C	4.25704	0.8	0.38	142.2	C1'-exo	2	-0.12	not measured	38.1044	T
AP1	seq_19	C	6.5	C-C	4.20769	1.2	0.3	143	C1'-exo	5	0.03	not measured	38.6413	C
AP1	seq_19	C	7.5	C-C	4.32872	0.5	-0.23	137.9	C1'-exo	3	0.1	not measured	35.5279	C
AP1	seq_19	C	8.5	C-T	4.57985	0.4	-0.38	152.9	C2'-endo	6	0.25	not measured	40.9924	C
AP1	seq_2	D	-8.5	C-C	4.46194	0.5	0.17	151.8	C2'-endo	9	0.33	not measured	31.5848	C
AP1	seq_2	D	-7.5	T-C	4.16993	1	-0.42	140	C1'-exo	5	0	not measured	34.8849	C
AP1	seq_2	D	-6.5	C-T	4.3662	0.6	0.28	149.2	C2'-endo	6	-0.26	not measured	33.6049	T
AP1	seq_2	D	-5.5	C-C	4.13241	0.8	-0.43	145.2	C2'-endo	6	-0.4	not measured	35.9117	C
AP1	seq_2	D	-4.5	C-C	4.19656	0.5	-0.18	151.8	C2'-endo	5	-0.45	not measured	37.045	C
AP1	seq_2	D	-1.5	T-C	4.4095	0.5	0.35	149.1	C2'-endo	8	0.06	not measured	30.2495	C
AP1	seq_2	D	-0.5	C-T	3.94124	2.2	-0.94	120.2	C1'-exo	6	-0.27	not measured	42.5231	T
AP1	seq_2	C	1.5	T-C	4.42965	0.4	-0.41	115.5	C1'-exo	8	-0.1	not measured	29.852	T
AP1	seq_2	C	4.5	C-C	4.08384	1.1	0.33	124.2	C1'-exo	8	-0.2	not measured	37.0705	C
AP1	seq_2	D	6.5	C-T	4.14941	1.4	-0.14	172.9	C2'-endo	9	0.06	not measured	37.3334	T
AP1	seq_2	C	8.5	C-C	4.32017	0.7	0.22	147.6	C2'-endo	2	0.23	not measured	41.1938	C
AP1	seq_2	C	9.5	C-T	4.50997	0.1	-0.96	143.4	C1'-exo	9	-0.03	not measured	30.4066	C
AP1	seq_20	D	-8.5	C-T	4.52149	0.3	0.53	153.7	C2'-endo	11	0.08	not measured	33.1656	T
AP1	seq_20	D	-7.5	C-C	4.32819	0.5	-0.02	148	C2'-endo	2	0.23	not measured	38.4072	C
AP1	seq_20	D	-6.5	T-C	4.2191	1	-0.32	139.6	C1'-exo	3	-0.02	not measured	37.4289	C
AP1	seq_20	D	-5.5	T-T	4.35505	0.6	0	142.2	C1'-exo	4	-0.27	not measured	37.6155	T
AP1	seq_20	D	-4.5	T-T	4.31696	0.8	-0.05	147.2	C2'-endo	4	-0.38	not measured	39.2243	T
AP1	seq_20	D	-1.5	T-C	4.44829	0.4	0.4	145	C2'-endo	10	-0.06	not measured	28.4792	C
AP1	seq_20	C	0.5	C-T	3.95361	2.1	0.94	143.2	C1'-exo	5	-0.28	not measured	43.5222	C
AP1	seq_20	C	1.5	T-C	4.42081	0.5	-0.36	108.2	C1'-exo	10	0.06	not measured	30.1059	T
AP1	seq_20	C	4.5	C-T	4.38737	0.6	-0.02	114.7	C1'-exo	5	-0.42	not measured	36.912	C
AP1	seq_20	C	5.5	T-C	4.18924	1	0.33	156.2	C2'-endo	5	-0.11	not measured	37.5436	T
AP1	seq_20	C	6.5	C-C	4.05355	1.4	0.54	148.3	C2'-endo	6	0.06	not measured	38.8983	C
AP1	seq_20	C	7.5	C-C	4.3912	0.2	-0.5	132.4	C1'-exo	2	-0.15	not measured	33.8232	C
AP1	seq_20	C	8.5	C-T	4.45494	0.6	-0.37	159	C2'-endo	9	0.14	not measured	33.3134	C
AP1	seq_21	D	-7.5	C-C	4.45747	0.6	-0.02	150.6	C2'-endo	5	0.22	not measured	36.6449	C
AP1	seq_21	D	-6.5	C-C	4.37252	0.6	0.2	155.9	C2'-endo	3	-0.07	not measured	35.9483	C
AP1	seq_21	D	-5.5	C-C	4.07908	1.4	-0.75	139.6	C1'-exo	9	0.06	not measured	39.0955	C
AP1	seq_21	D	-4.5	T-C	4.23927	0.7	-0.11	136.4	C1'-exo	5	-0.16	not measured	33.1368	C
AP1	seq_21	D	-1.5	T-C	4.36533	0.6	0.37	144.4	C2'-endo	9	-0.07	not measured	28.3027	C
AP1	seq_21	D	-0.5	C-T	3.93642	2.3	-1.09	117.8	C1'-exo	6	-0.24	not measured	44.031	T
AP1	seq_21	C	1.5	T-C	4.44032	0.3	-0.44	117.3	C1'-exo	7	-0.22	not measured	29.1581	T
AP1	seq_21	D	5.5	C-C	4.47047	0.4	-0.01	151.4	C2'-endo	4	0.27	not measured	39.4045	C
AP1	seq_21	D	8.5	T-C	4.33985	0.6	-0.38	158.1	C2'-endo	6	-0.21	not measured	40.9452	C
AP1	seq_22	D	-7.5	T-T	4.39053	0.7	-0.11	152.4	C2'-endo	7	0.11	not measured	39.9184	T
AP1	seq_22	D	-6.5	C-T	4.42353	0.3	0.37	155	C2'-endo	2	-0.43	not measured	35.3928	T
AP1	seq_22	D	-5.5	C-C	4.07837	1.1	-0.5	148.4	C2'-endo	7	-0.12	not measured	39.7196	C
AP1	seq_22	D	-4.5	T-C	4.25729	0.6	-0.11	147.8	C2'-endo	5	-0.19	not measured	35.5979	C
AP1	seq_22	D	-1.5	T-C	4.4071	0.6	0.34	146.4	C2'-endo	8	0	not measured	30.4299	C
AP1	seq_22	D	-0.5	C-T	4.04059	1.8	-0.88	122.8	C1'-exo	6	-0.27	not measured	42.7648	T
AP1	seq_22	C	1.5	T-C	4.3953	0.5	-0.33	120.1	C1'-exo	9	-0.14	not measured	29.6356	T
AP1	seq_22	C	4.5	T-T	4.29374	0.9	0.1	122.7	C1'-exo	5	-0.37	not measured	38.8969	T
AP1	seq_22	C	5.5	T-T	4.36458	0.7	0.04	147.4	C2'-endo	5	-0.23	not measured	39.5989	T
AP1	seq_22	C	6.5	T-C	4.19975	1.1	0.48	147.8	C2'-endo	3	-0.06	not measured	38.6694	T
AP1	seq_22	C	7.5	C-C	4.24428	1.2	0.23	152.9	C2'-endo	13	0.53	not measured	33.9015	C
AP1	seq_23	D	-8.5	T-C	4.21988	1.6	-0.69	159.9	C2'-endo	6	0.39	not measured	41.4218	C
AP1	seq_23	D	-7.5	T-T	4.2473	0.7	0.16	145.3	C2'-endo	4	-0.52	not measured	33.5124	T
AP1	seq_23	D	-6.5	C-T	4.46813	0.3	0.38	150.4	C2'-endo	2	-0.36	not measured	37.5745	T
AP1	seq_23	D	-5.5	C-C	4.11068	1	-0.45	145.9	C2'-endo	5	-0.29	not measured	38.2008	C
AP1	seq_23	C	-3.5	C-T	4.10969	1.5	0.1	152.6	C2'-endo	8	-0.25	not measured	35.4422	C
AP1	seq_23	D	-1.5	T-C	4.27669	0.8	0.26	149	C2'-endo	10	0.11	not measured	28.584	C
AP1	seq_23	D	-0.5	C-T	3.95865	2	-1	109.9	C1'-exo	6	-0.28	not measured	43.4042	T
AP1	seq_23	C	1.5	T-C	4.43303	0.4	-0.43	110.1	C1'-exo	8	-0.08	not measured	29.8577	T
AP1	seq_23	C	4.5	C-C	4.15183	0.9	0.3	116.8	C1'-exo	6	-0.18	not measured	38.5683	C
AP1	seq_23	D	6.5	C-T	4.08718	1.6	-0.48	83.8	O4'-endo	6	0.06	not measured	43.0857	T
AP1	seq_23	D	7.5	T-C	4.24528	0.8	-0.39	150.2	C2'-endo	3	-0.05	not measured	40.0874	C
AP1	seq_23	C	9.5	C-C	4.37081	0.5	-0.17	100.2	O4'-endo	8	-0.13	not measured	30.6933	C
AP1	seq_24	C	-8.5	T-C	4.4555	0.9	0.31	157.4	C2'-endo	5	0.35	not measured	42.5849	T
AP1	seq_24	C	-7.5	C-T	4.25209	1.1	0.44	152.1	C2'-endo	5	0.06	not measured	40.9413	C
AP1	seq_24	D	-5.5	C-C	4.06749	2.1	-0.93	154.7	C2'-endo	11	0.29	not measured	40.2895	C
AP1	seq_24	D	-4.5	T-C	4.20194	0.8	-0.19	143.3	C1'-exo	5	-0.18	not measured	34.8941	C
AP1	seq_24	D	-1.5	T-C	4.42092	0.5	0.38	147.8	C2'-endo	9	-0.01	not measured	29.4631	C
AP1	seq_24	D	-0.5	C-T	4.01219	2	-0.91	115.9	C1'-exo	5	-0.25	not measured	43.7994	T
AP1	seq_24	C	1.5	T-C	4.47945	0.5	-0.38	102.8	O4'-endo	9	-0.04	not measured	30.1286	T
AP1	seq_24	C	4.5	C-T	4.49888	0.3	-0.16	113.8	C1'-exo	6	-0.43	not measured	35.1881	C
AP1	seq_24	C	5.5	T-C	4.22431	1.1	0.42	158	C2'-endo	4	-0.11	not measured	37.9398	T
AP1	seq_24	C	6.5	C-C	4.21201	1.1	0.43	149.1	C2'-endo	5	0.19	not measured	40.239	C
AP1	seq_24	C	7.5	C-C	4.33384	0.5	-0.24	147.7	C2'-endo	1	0.01	not measured	36.7432	C
AP1	seq_24	C	8.5	C-T	4.64854	0.3	-0.46	158.1	C2'-endo	7	0.33	not measured	40.8559	C
AP1	seq_25	C	-7.5	C-T	4.32606	0.8	0.37	150.9	C2'-endo	5	0	not measured	42.0653	C
AP1	seq_25	D	-5.5	C-C	4.1425	1.7	-0.75	156.6	C2'-endo	9	0.3	not measured	41.9695	C
AP1	seq_25	D	-4.5	T-C	4.28487	0.7	-0.18	150.6	C2'-endo	3	-0.14	not measured	37.0107	C
AP1	seq_25	D	-1.5	T-C	4.40894	0.5	0.34	145.5	C2'-endo	8	-0.13	not measured	29.8289	C
AP1	seq_25	C	0.5	C-T	3.9185	2.2	1	148.5	C2'-endo	7	-0.26	not measured	43.0035	C
AP1	seq_25	C	1.5	T-C	4.35311	0.6	-0.3	123.1	C1'-exo	9	0.03	not measured	30.084	T
AP1	seq_25	C	4.5	C-C	4.23193	0.2	0.09	138.7	C1'-exo	6	-0.71	not measured	38.5551	C
AP1	seq_25	C	5.5	C-T	4.48081	0.4	-0.26	196.2	C3'-exo	5	-0.13	not measured	32.8036	C
AP1	seq_25	C	6.5	T-C	4.08115	1.5	0.58	159.6	C2'-endo	6	0.02	not measured	35.3248	T
AP1	seq_25	C	7.5	C-C	4.30813	0.3	-0.3	146.5	C2'-endo	5	-0.14	not measured	33.3888	C
AP1	seq_25	C	8.5	C-C	4.20839	0.9	0.28	149	C2'-endo	6	0.04	not measured	37.8199	C
AP1	seq_25	C	9.5	C-C	4.45574	0.2	-0.35	151.4	C2'-endo	5	-0.01	not measured	35.3014	C
AP1	seq_26	D	-6.5	C-T	4.54117	0.3	0.56	161.9	C2'-endo	6	0.01	not measured	33.7872	T
AP1	seq_26	D	-5.5	C-C	4.16265	1.1	-0.54	155.2	C2'-endo	4	-0.18	not measured	40.5008	C
AP1	seq_26	C	-3.5	C-T	4.16549	1.4	0.04	154.4	C2'-endo	9	-0.17	not measured	34.7723	C
AP1	seq_26	D	-1.5	T-C	4.36755	0.7	0.27	151.2	C2'-endo	11	0.15	not measured	29.9381	C
AP1	seq_26	D	-0.5	C-T	4.00093	1.9	-0.93	108	O4'-endo	5	-0.28	not measured	43.4159	T
AP1	seq_26	C	1.5	T-C	4.4964	0.4	-0.43	99.5	O4'-endo	9	0	not measured	30.1648	T
AP1	seq_26	C	4.5	C-T	4.47079	0.4	-0.14	105.4	O4'-endo	7	-0.46	not measured	34.6237	C
AP1	seq_26	C	5.5	T-C	4.21014	1.1	0.4	157.7	C2'-endo	4	-0.2	not measured	37.5458	T
AP1	seq_26	C	6.5	C-C	4.22329	1	0.38	151.7	C2'-endo	5	0.16	not measured	39.6904	C
AP1	seq_26	C	7.5	C-C	4.33853	0.3	-0.34	146.4	C2'-endo	2	-0.04	not measured	36.6886	C
AP1	seq_26	C	8.5	C-T	4.52342	0.6	-0.31	161.4	C2'-endo	6	0.26	not measured	41.4636	C
AP1	seq_27	D	-7.5	C-T	4.48552	0.5	0.24	169	C2'-endo	6	0.09	not measured	40.8959	T
AP1	seq_27	D	-6.5	C-C	4.30922	0.4	0.4	159.4	C2'-endo	3	0.01	not measured	34.899	C
AP1	seq_27	D	-5.5	C-C	4.14462	1.6	-0.82	140.4	C1'-exo	9	0.17	not measured	40.6035	C
AP1	seq_27	D	-4.5	T-C	4.25527	0.8	-0.13	121.8	C1'-exo	5	-0.16	not measured	35.5475	C
AP1	seq_27	D	-1.5	T-C	4.46239	0.4	0.46	143.7	C1'-exo	9	-0.13	not measured	28.8491	C
AP1	seq_27	C	0.5	C-T	4.00369	2.1	1	142.3	C1'-exo	6	-0.23	not measured	43.7645	C
AP1	seq_27	C	1.5	T-C	4.36363	0.5	-0.4	115.7	C1'-exo	9	-0.03	not measured	30.5462	T
AP1	seq_27	C	6.5	T-C	4.2148	0.9	0.34	150.1	C2'-endo	3	-0.02	not measured	37.4228	T
AP1	seq_27	C	7.5	C-T	4.32791	0.7	-0.17	148.1	C2'-endo	8	0.08	not measured	35.8608	C
AP1	seq_28	C	-8.5	T-T	4.55355	0.7	-0.04	142.1	C1'-exo	10	0.19	not measured	37.4906	T
AP1	seq_28	D	-6.5	C-C	4.38586	0.7	0.25	152	C2'-endo	6	0	not measured	34.8951	C
AP1	seq_28	D	-5.5	C-C	4.15876	1.1	-0.64	144.4	C2'-endo	6	0.03	not measured	39.7144	C
AP1	seq_28	C	-3.5	C-T	4.10697	1.4	0.02	152.4	C2'-endo	8	-0.32	not measured	35.3579	C
AP1	seq_28	D	-1.5	T-C	4.30173	0.9	0.28	144.7	C2'-endo	12	0.04	not measured	27.7828	C
AP1	seq_28	D	-0.5	C-T	3.94537	2.3	-1.08	100.2	O4'-endo	5	-0.25	not measured	44.1489	T
AP1	seq_28	C	1.5	T-C	4.43902	0.4	-0.49	106.5	O4'-endo	8	-0.17	not measured	28.5324	T
AP1	seq_28	C	4.5	T-C	4.33668	0.5	0.01	112.6	C1'-exo	4	-0.16	not measured	34.7594	T
AP1	seq_28	C	5.5	C-C	4.0994	1.5	0.88	135.1	C1'-exo	7	0.09	not measured	40.7987	C
AP1	seq_28	C	6.5	C-C	4.31736	0.8	-0.27	138.8	C1'-exo	7	0.1	not measured	30.6584	C
AP1	seq_28	D	8.5	C-T	4.27638	1	-0.16	133.5	C1'-exo	4	0.11	not measured	37.583	T
AP1	seq_28	D	9.5	C-C	4.59784	0.6	0.07	150.3	C2'-endo	5	0.14	not measured	47.5931	C
AP1	seq_29	D	-8.5	T-T	4.38124	0.7	-0.07	154.9	C2'-endo	8	0.16	not measured	41.4131	T
AP1	seq_29	D	-7.5	C-T	4.81833	0.1	0.41	157.4	C2'-endo	4	-0.24	not measured	42.5001	T
AP1	seq_29	D	-6.5	C-C	4.1664	0.6	0.18	184.4	C3'-exo	1	-0.2	not measured	31.5417	C
AP1	seq_29	D	-5.5	C-C	4.13016	1.3	-0.6	155.8	C2'-endo	8	-0.04	not measured	38.3	C
AP1	seq_29	D	-4.5	C-C	4.21635	0.3	0.03	150.1	C2'-endo	6	-0.47	not measured	34.3939	C
AP1	seq_29	D	-1.5	T-C	4.3996	0.5	0.36	149.5	C2'-endo	8	0.03	not measured	29.9936	C
AP1	seq_29	D	-0.5	C-T	3.9802	2	-0.95	118.1	C1'-exo	6	-0.26	not measured	43.0714	T
AP1	seq_29	C	1.5	T-C	4.39799	0.5	-0.36	113.2	C1'-exo	9	-0.11	not measured	28.6753	T
AP1	seq_29	C	4.5	T-T	4.20574	1.1	0.24	125.7	C1'-exo	6	-0.42	not measured	35.8681	T
AP1	seq_29	C	5.5	T-C	4.25644	0.7	0.36	144.6	C2'-endo	2	-0.28	not measured	37.7787	T
AP1	seq_29	C	6.5	C-C	4.21118	1.2	0.37	151.3	C2'-endo	6	0.05	not measured	37.2988	C
AP1	seq_29	C	7.5	C-C	4.45932	0.3	-0.32	148.4	C2'-endo	4	0.13	not measured	36.111	C
AP1	seq_29	C	8.5	C-T	4.67031	0.1	-0.64	156.2	C2'-endo	4	-0.03	not measured	40.6406	C
AP1	seq_29	C	9.5	T-T	4.42042	0.7	0.02	154.1	C2'-endo	8	0.29	not measured	45.2377	T
AP1	seq_3	D	-6.5	C-C	4.45673	0.4	0.52	152.3	C2'-endo	4	0.05	not measured	33.244	C
AP1	seq_3	D	-5.5	C-C	4.01314	1.9	-0.94	145.2	C2'-endo	11	0.15	not measured	38.0732	C
AP1	seq_3	D	-4.5	T-C	4.17268	0.7	-0.08	137.1	C1'-exo	3	-0.04	not measured	34.7728	C
AP1	seq_3	D	-1.5	T-C	4.33581	0.6	0.32	148.5	C2'-endo	8	-0.06	not measured	30.678	C
AP1	seq_3	D	-0.5	C-T	3.99169	2.1	-0.92	124.2	C1'-exo	6	-0.22	not measured	42.975	T
AP1	seq_3	C	1.5	T-C	4.37574	0.5	-0.36	116.6	C1'-exo	8	-0.15	not measured	28.8595	T
AP1	seq_3	C	4.5	T-C	4.31833	0.4	0.04	135.6	C1'-exo	3	-0.06	not measured	38.5714	T
AP1	seq_3	C	7.5	C-T	4.57316	0.1	-0.42	140.4	C1'-exo	2	-0.59	not measured	37.2468	C
AP1	seq_3	C	8.5	T-T	4.42645	0.3	-0.05	150	C2'-endo	6	-0.16	not measured	38.9188	T
AP1	seq_30	D	-6.5	C-C	4.38456	0.6	0.2	159.3	C2'-endo	5	0.03	not measured	32.7842	C
AP1	seq_30	D	-5.5	C-C	4.16943	1.4	-0.71	157.3	C2'-endo	6	0.07	not measured	40.8189	C
AP1	seq_30	D	-4.5	C-C	4.32345	0.2	0.05	156.8	C2'-endo	4	-0.43	not measured	36.0876	C
AP1	seq_30	D	-1.5	T-C	4.38994	0.5	0.34	151.2	C2'-endo	9	0.04	not measured	30.1197	C
AP1	seq_30	D	-0.5	C-T	3.93636	2.2	-0.97	125.8	C1'-exo	7	-0.27	not measured	42.1072	T
AP1	seq_30	C	1.5	T-C	4.39301	0.4	-0.36	121.8	C1'-exo	8	-0.21	not measured	28.5249	T
AP1	seq_30	D	5.5	T-C	4.26495	0.8	-0.19	147.1	C2'-endo	2	-0.28	not measured	37.2094	C
AP1	seq_30	C	7.5	T-T	4.36898	0.7	-0.04	192.2	C3'-exo	6	0.05	not measured	37.5317	T
AP1	seq_31	D	-5.5	C-C	4.13471	1.2	-0.45	151	C2'-endo	8	-0.12	not measured	35.7102	C
AP1	seq_31	D	-4.5	C-C	4.22351	0.5	-0.13	153.7	C2'-endo	5	-0.37	not measured	37.1067	C
AP1	seq_31	D	-1.5	T-C	4.38123	0.6	0.34	149.4	C2'-endo	8	0.03	not measured	30.8416	C
AP1	seq_31	D	-0.5	C-T	3.93053	2.1	-0.95	116	C1'-exo	6	-0.3	not measured	42.2166	T
AP1	seq_31	C	1.5	T-C	4.41752	0.4	-0.4	114.5	C1'-exo	7	-0.14	not measured	29.8335	T
AP1	seq_31	D	7.5	C-C	4.15506	0.9	-0.13	152.3	C2'-endo	3	-0.23	not measured	34.0478	C
AP1	seq_31	C	9.5	T-C	4.30036	0.8	0.37	149.2	C2'-endo	6	0.28	not measured	39.1618	T
AP1	seq_32	C	-7.5	C-C	4.19626	0.7	0.29	156.1	C2'-endo	6	-0.1	not measured	38.9808	C
AP1	seq_32	D	-5.5	C-C	4.13892	1.6	-0.82	147.9	C2'-endo	9	0.2	not measured	39.3744	C
AP1	seq_32	D	-4.5	T-C	4.33868	0.5	-0.05	153.2	C2'-endo	2	-0.2	not measured	37.2091	C
AP1	seq_32	D	-1.5	T-C	4.41347	0.5	0.29	143.6	C1'-exo	8	-0.12	not measured	29.6825	C
AP1	seq_32	C	0.5	C-T	3.95988	2.2	0.96	145.3	C2'-endo	6	-0.25	not measured	43.0402	C
AP1	seq_32	C	1.5	T-C	4.37518	0.7	-0.25	116.9	C1'-exo	10	0.11	not measured	30.4397	T
AP1	seq_32	C	4.5	C-T	4.42142	0.3	-0.07	125.8	C1'-exo	2	-0.74	not measured	37.9131	C
AP1	seq_32	C	5.5	T-T	4.39828	0.5	-0.13	154.9	C2'-endo	6	-0.32	not measured	35.3007	T
AP1	seq_32	C	6.5	T-C	4.24777	1.2	0.48	148.5	C2'-endo	5	0.14	not measured	39.4639	T
AP1	seq_32	C	7.5	C-C	4.34906	0.5	-0.14	150.2	C2'-endo	3	0.11	not measured	36.6929	C
AP1	seq_32	C	8.5	C-T	4.63278	0.1	-0.58	152.2	C2'-endo	4	-0.23	not measured	39.5321	C
AP1	seq_32	C	9.5	T-T	4.39792	0.9	0.23	156.1	C2'-endo	10	0.34	not measured	42.3846	T
AP1	seq_4	D	-6.5	C-C	4.47182	0.1	0.5	143.6	C1'-exo	4	-0.17	not measured	33.6763	C
AP1	seq_4	D	-5.5	C-C	4.13942	1.4	-0.66	149.7	C2'-endo	8	-0.09	not measured	37.2023	C
AP1	seq_4	D	-4.5	C-C	4.21823	0.3	-0.03	141.8	C1'-exo	5	-0.46	not measured	34.3348	C
AP1	seq_4	D	-1.5	T-C	4.35602	0.5	0.32	150.1	C2'-endo	8	-0.02	not measured	31.2797	C
AP1	seq_4	D	-0.5	C-T	3.96251	2	-0.91	123.3	C1'-exo	6	-0.27	not measured	42.8669	T
AP1	seq_4	C	1.5	T-C	4.42054	0.4	-0.35	118.4	C1'-exo	7	-0.14	not measured	30.271	T
AP1	seq_4	C	4.5	T-C	4.30012	0.6	0	182.6	C3'-exo	2	-0.07	not measured	37.3077	T
AP1	seq_4	C	7.5	C-C	4.43449	0.2	-0.22	139.2	C1'-exo	3	-0.26	not measured	35.6886	C
AP1	seq_4	C	8.5	C-C	4.21532	0.9	0.48	136.6	C1'-exo	3	-0.04	not measured	39.359	C
AP1	seq_4	C	9.5	C-T	4.39654	0.5	-0.68	126.9	C1'-exo	6	-0.08	not measured	30.9914	C
AP1	seq_5	D	-8.5	T-C	4.32262	1	-0.45	148.9	C2'-endo	9	0.34	not measured	39.4602	C
AP1	seq_5	D	-5.5	C-C	4.07717	1.7	-0.68	146	C2'-endo	9	0.18	not measured	40.0406	C
AP1	seq_5	D	-4.5	T-C	4.20799	0.9	-0.22	144.4	C2'-endo	7	-0.07	not measured	35.0249	C
AP1	seq_5	D	-1.5	T-C	4.3543	0.6	0.33	145.5	C2'-endo	8	-0.03	not measured	30.3425	C
AP1	seq_5	D	-0.5	C-T	3.99578	2	-0.9	119.6	C1'-exo	6	-0.27	not measured	42.4948	T
AP1	seq_5	C	1.5	T-C	4.37423	0.5	-0.36	114.2	C1'-exo	9	-0.1	not measured	29.2142	T
AP1	seq_5	C	4.5	C-C	4.20572	0.7	0.19	126.2	C1'-exo	5	-0.29	not measured	36.2884	C
AP1	seq_5	C	7.5	T-T	4.34573	0.7	-0.17	133.3	C1'-exo	5	-0.2	not measured	36.0254	T
AP1	seq_5	C	8.5	T-C	4.24489	0.8	0.3	142.6	C1'-exo	1	0.04	not measured	38.4141	T
AP1	seq_5	C	9.5	C-T	4.42699	0.6	-0.36	147.8	C2'-endo	11	0.24	not measured	31.7723	C
AP1	seq_6	D	-7.5	C-C	4.30983	0.7	-0.13	153.9	C2'-endo	5	-0.1	not measured	36.3432	C
AP1	seq_6	D	-4.5	T-C	4.19031	0.7	-0.14	94.4	O4'-endo	3	-0.17	not measured	38.0807	C
AP1	seq_6	D	-1.5	T-C	4.38513	0.5	0.38	147.6	C2'-endo	10	0	not measured	28.7371	C
AP1	seq_6	D	-0.5	C-T	3.93379	2.4	-1.15	113.3	C1'-exo	6	-0.25	not measured	45.3511	T
AP1	seq_6	C	1.5	T-C	4.40473	0.4	-0.4	111.3	C1'-exo	9	-0.11	not measured	28.4564	T
AP1	seq_6	C	4.5	T-T	4.37427	0.5	-0.11	113.3	C1'-exo	6	-0.35	not measured	38.4098	T
AP1	seq_6	C	5.5	T-T	4.36467	0.5	-0.07	146.5	C2'-endo	4	-0.3	not measured	40.1419	T
AP1	seq_6	C	6.5	T-T	4.2816	0.8	0.09	139.7	C1'-exo	5	-0.1	not measured	39.4668	T
AP1	seq_6	D	8.5	C-C	4.2137	1.2	-0.74	155.1	C2'-endo	8	0.63	not measured	41.1227	C
AP1	seq_6	D	9.5	C-C	4.64843	0.3	0.14	154.6	C2'-endo	10	0.1	not measured	40.6275	C
AP1	seq_7	C	-5.5	C-T	4.46851	0.4	-0.31	80.2	O4'-endo	8	-0.54	not measured	35.3811	C
AP1	seq_7	C	-4.5	T-C	4.31636	0.4	0.19	160.9	C2'-endo	2	-0.27	not measured	41.7308	T
AP1	seq_7	C	-3.5	C-T	4.14714	1.2	0.02	158.3	C2'-endo	7	-0.18	not measured	34.5141	C
AP1	seq_7	D	-1.5	T-C	4.37299	0.7	0.4	147.2	C2'-endo	11	0.21	not measured	29.2007	C
AP1	seq_7	D	-0.5	C-T	4.02507	2	-0.93	107.9	O4'-endo	6	-0.2	not measured	43.8397	T
AP1	seq_7	C	1.5	T-C	4.40173	0.6	-0.34	100.9	O4'-endo	9	-0.01	not measured	30.6658	T
AP1	seq_7	C	4.5	C-C	4.31123	0.3	-0.02	105	O4'-endo	5	-0.46	not measured	33.8315	C
AP1	seq_7	C	5.5	C-C	4.20327	1.1	0.64	147.8	C2'-endo	6	-0.06	not measured	37.775	C
AP1	seq_7	C	6.5	C-C	4.33691	0.5	-0.26	146.4	C2'-endo	3	0.01	not measured	37.2735	C
AP1	seq_7	C	7.5	C-C	4.33905	0.5	-0.05	147.5	C2'-endo	3	0.07	not measured	39.9011	C
AP1	seq_7	C	8.5	C-T	4.43024	0.5	-0.44	149.2	C2'-endo	6	0.09	not measured	38.4399	C
AP1	seq_7	C	9.5	T-C	4.31163	1	0.45	144.9	C2'-endo	4	0.27	not measured	43.2613	T
AP1	seq_8	C	-7.5	T-C	4.14598	1.6	0.67	145.1	C2'-endo	7	0	not measured	38.0316	T
AP1	seq_8	C	-6.5	C-C	3.99279	1	0.16	150.8	C2'-endo	6	-0.14	not measured	39.5961	C
AP1	seq_8	C	-5.5	C-T	4.51036	0.4	-0.35	81.5	O4'-endo	8	-0.15	not measured	34.5097	C
AP1	seq_8	C	-4.5	T-C	4.35883	0.4	0.32	163.1	C2'-endo	2	-0.19	not measured	42.8768	T
AP1	seq_8	C	-3.5	C-T	4.12117	1.3	0.03	161.5	C2'-endo	7	-0.16	not measured	34.3402	C
AP1	seq_8	D	-1.5	T-C	4.32701	0.7	0.31	149.4	C2'-endo	11	0.21	not measured	30.7935	C
AP1	seq_8	D	-0.5	C-T	4.03641	1.8	-0.86	119.5	C1'-exo	6	-0.21	not measured	43.9527	T
AP1	seq_8	C	1.5	T-C	4.3859	0.6	-0.3	113.1	C1'-exo	8	-0.09	not measured	30.2403	T
AP1	seq_8	C	4.5	T-C	4.24815	0.6	0.16	127.9	C1'-exo	4	-0.21	not measured	36.125	T
AP1	seq_8	C	5.5	C-C	4.09647	1.4	0.81	146.1	C2'-endo	9	0.12	not measured	38.3824	C
AP1	seq_8	C	6.5	C-C	4.36785	0.5	-0.33	142.7	C1'-exo	5	0.01	not measured	34.8087	C
AP1	seq_8	C	7.5	C-C	4.26518	0.6	0.05	157.5	C2'-endo	3	0.07	not measured	39.6135	C
AP1	seq_8	C	8.5	C-T	4.54066	0.2	-0.58	151.8	C2'-endo	4	-0.15	not measured	37.2166	C
AP1	seq_8	C	9.5	T-C	4.23253	1.3	0.61	154.4	C2'-endo	3	0.28	not measured	44.6556	T
AP1	seq_9	C	-8.5	C-T	4.82046	0	-0.64	131.5	C1'-exo	8	-0.16	not measured	35.1599	C
AP1	seq_9	D	-6.5	C-C	4.11637	1.4	-0.28	152.8	C2'-endo	9	0.28	not measured	34.8336	C
AP1	seq_9	D	-5.5	T-C	4.13168	1.2	-0.6	143.9	C1'-exo	4	-0.13	not measured	38.3007	C
AP1	seq_9	D	-4.5	T-T	4.24987	1	-0.14	140.3	C1'-exo	7	-0.31	not measured	35.5816	T
AP1	seq_9	D	-1.5	T-C	4.43184	0.3	0.47	145.6	C2'-endo	10	-0.19	not measured	27.5544	C
AP1	seq_9	C	0.5	C-T	4.00809	1.9	0.91	143.2	C1'-exo	5	-0.3	not measured	43.6692	C
AP1	seq_9	C	1.5	T-C	4.40171	0.5	-0.38	112.7	C1'-exo	9	-0.08	not measured	29.6192	T
AP1	seq_9	C	4.5	T-C	4.24787	0.6	0.06	115.6	C1'-exo	6	-0.2	not measured	33.6979	T
AP1	seq_9	C	5.5	C-C	4.04252	1.4	0.79	131.2	C1'-exo	11	0.03	not measured	35.8733	C
AP1	seq_9	C	6.5	C-C	4.29416	0.6	-0.24	142.2	C1'-exo	4	-0.15	not measured	35.3202	C
AP1	seq_9	C	7.5	C-C	4.30408	0.3	0.02	154.1	C2'-endo	1	-0.2	not measured	39.5334	C
AP1	seq_9	C	8.5	C-T	4.5329	0.1	-0.58	150.3	C2'-endo	5	-0.25	not measured	33.6195	C
ETS	seq_1	B	-8.5	C-T	4.59841	0.3	-0.21	20.2	C3'-endo	14	-0.73	not measured	29.4766	C
ETS	seq_1	B	-7.5	T-T	4.38212	0.6	-0.06	151.1	C2'-endo	6	-0.41	not measured	36.3539	T
ETS	seq_1	B	-6.5	T-C	4.19245	0.8	0.26	141.3	C1'-exo	4	-0.1	not measured	39.3088	T
ETS	seq_1	B	-5.5	C-C	4.09779	1.3	0.43	147.5	C2'-endo	7	0.06	not measured	34.9377	C
ETS	seq_1	C	-3.5	C-C	4.44969	0	0.6	145	C2'-endo	6	-0.78	not measured	29.2338	C
ETS	seq_1	C	-0.5	C-C	3.86427	2.2	-1.23	134.2	C1'-exo	10	-0.33	not measured	32.0955	C
ETS	seq_1	C	0.5	T-C	3.93916	1	-0.02	124.8	C1'-exo	9	-0.47	not measured	24.2239	C
ETS	seq_1	C	1.5	T-T	3.82732	1.6	-0.36	113.1	C1'-exo	6	-0.32	not measured	34.6405	T
ETS	seq_1	C	2.5	C-T	4.85099	0	0.58	143.4	C1'-exo	5	-0.65	not measured	39.3664	T
ETS	seq_1	C	3.5	C-C	3.57748	3.1	-1.18	138.2	C1'-exo	1	-0.44	not measured	30.6161	C
ETS	seq_1	C	4.5	C-C	4.16371	1.3	-0.02	144.7	C2'-endo	12	0.36	not measured	31.535	C
ETS	seq_1	C	5.5	T-C	4.22157	0.8	-0.27	149.2	C2'-endo	3	0.08	not measured	39.3815	C
ETS	seq_1	C	6.5	T-T	4.23586	1.1	-0.2	138.8	C1'-exo	4	-0.04	not measured	38.8677	T
ETS	seq_1	C	7.5	T-T	4.29969	0.8	-0.07	137.6	C1'-exo	5	-0.24	not measured	38.9393	T
ETS	seq_1	C	8.5	C-T	4.42077	0.6	0.1	142.4	C1'-exo	5	-0.52	not measured	39.3054	T
ETS	seq_10	B	-8.5	C-T	4.71313	0.2	-0.33	15.4	C3'-endo	13	-0.59	not measured	30.2193	C
ETS	seq_10	B	-5.5	T-C	4.16835	0.9	0.3	132.3	C1'-exo	4	-0.22	not measured	35.9224	T
ETS	seq_10	B	-4.5	C-C	4.1526	0.8	0.19	136.8	C1'-exo	5	-0.26	not measured	36.1482	C
ETS	seq_10	C	-2.5	C-T	4.20709	0.8	-0.25	137.6	C1'-exo	4	-0.7	not measured	36.4546	T
ETS	seq_10	C	-1.5	C-C	4.32242	0.3	0.6	132.2	C1'-exo	10	-0.34	not measured	23.0945	C
ETS	seq_10	C	-0.5	C-C	3.77668	2.1	-1.4	87	O4'-endo	6	-0.44	not measured	36.3589	C
ETS	seq_10	C	0.5	T-C	3.89675	1.2	-0.13	116	C1'-exo	9	-0.52	not measured	23.9006	C
ETS	seq_10	C	1.5	T-T	3.79913	1.8	-0.43	113.3	C1'-exo	7	-0.27	not measured	34.0465	T
ETS	seq_10	C	2.5	C-T	4.83834	0	0.52	144	C2'-endo	5	-0.61	not measured	40.4141	T
ETS	seq_10	C	3.5	C-C	3.55628	3.2	-1.18	135.7	C1'-exo	1	-0.42	not measured	30.9659	C
ETS	seq_10	C	4.5	C-C	4.19394	1.3	-0.18	146.4	C2'-endo	12	0.34	not measured	34.5883	C
ETS	seq_10	B	6.5	C-T	4.46096	0.5	-0.21	109.2	C1'-exo	6	-0.39	not measured	35.581	C
ETS	seq_10	B	7.5	T-T	4.24463	1	0.05	142.7	C1'-exo	5	-0.18	not measured	37.6606	T
ETS	seq_10	B	8.5	T-C	4.27804	0.7	0.13	140.2	C1'-exo	4	0.01	not measured	38.7457	T
ETS	seq_10	B	9.5	C-C	4.38185	1	0.46	143.4	C1'-exo	10	0.69	not measured	40.702	C
ETS	seq_11	C	-6.5	C-C	4.29355	0.6	0.08	145.5	C2'-endo	4	-0.06	not measured	34.1987	C
ETS	seq_11	C	-5.5	T-C	4.20115	1	-0.38	141.9	C1'-exo	3	0.01	not measured	40.074	C
ETS	seq_11	C	-4.5	T-T	4.22901	0.9	-0.07	137.1	C1'-exo	4	-0.35	not measured	37.4654	T
ETS	seq_11	C	-3.5	C-T	4.69471	0	0.72	149.6	C2'-endo	4	-0.72	not measured	32.2925	T
ETS	seq_11	C	-0.5	C-C	3.84071	2.2	-1.26	108.7	C1'-exo	7	-0.35	not measured	34.4004	C
ETS	seq_11	C	0.5	T-C	3.94511	1.1	-0.07	124.4	C1'-exo	9	-0.43	not measured	24.9574	C
ETS	seq_11	C	1.5	T-T	3.85845	1.6	-0.33	114.2	C1'-exo	6	-0.3	not measured	34.2034	T
ETS	seq_11	C	2.5	C-T	4.86035	0	0.51	145.6	C2'-endo	5	-0.66	not measured	39.375	T
ETS	seq_11	C	3.5	C-C	3.64341	2.4	-0.81	140.5	C1'-exo	2	-0.7	not measured	29.58	C
ETS	seq_11	B	5.5	T-T	4.16964	1.2	0.06	146.2	C2'-endo	8	-0.18	not measured	32.4338	T
ETS	seq_11	C	7.5	T-C	4.1284	1.4	-0.41	149	C2'-endo	7	0.05	not measured	35.2078	C
ETS	seq_11	C	8.5	T-T	4.27832	1	-0.23	144.9	C2'-endo	4	-0.21	not measured	40.494	T
ETS	seq_12	C	-8.5	T-C	4.13303	1.4	-0.52	107.7	O4'-endo	6	0.04	not measured	38.4695	C
ETS	seq_12	C	-7.5	C-T	4.42817	0.5	0.3	141.7	C1'-exo	5	-0.26	not measured	35.7108	T
ETS	seq_12	C	-6.5	C-C	4.20295	0.7	-0.15	128.6	C1'-exo	3	-0.17	not measured	37.0891	C
ETS	seq_12	C	-5.5	T-C	4.08865	1.4	-0.52	135.1	C1'-exo	5	0	not measured	38.1769	C
ETS	seq_12	C	-4.5	C-T	4.45539	0.5	0.2	144.2	C2'-endo	6	-0.34	not measured	34.4806	T
ETS	seq_12	B	-2.5	C-C	4.23983	0	-0.38	109.5	C1'-exo	8	-0.86	not measured	27.6486	C
ETS	seq_12	C	-0.5	C-C	3.81485	2.4	-1.35	130.9	C1'-exo	9	-0.31	not measured	33.8217	C
ETS	seq_12	C	0.5	T-C	3.92875	1.2	-0.09	119	C1'-exo	10	-0.43	not measured	24.6768	C
ETS	seq_12	C	1.5	T-T	3.82727	1.7	-0.37	113.3	C1'-exo	7	-0.29	not measured	34.1741	T
ETS	seq_12	C	2.5	C-T	4.84855	0	0.63	143.4	C1'-exo	6	-0.6	not measured	37.8665	T
ETS	seq_12	C	3.5	C-C	3.59704	2.7	-1.01	146.9	C2'-endo	1	-0.42	not measured	32.0131	C
ETS	seq_12	C	4.5	T-C	4.06492	1.7	-0.47	142.7	C1'-exo	11	0.2	not measured	33.43	C
ETS	seq_12	B	8.5	C-C	4.24911	0.5	-0.09	129.3	C1'-exo	5	-0.24	not measured	34.951	C
ETS	seq_12	B	9.5	C-C	4.18568	1.2	0.42	128.1	C1'-exo	6	-0.05	not measured	39.3238	C
ETS	seq_13	C	-8.5	C-C	4.28576	0.9	-0.26	147	C2'-endo	6	0.17	not measured	39.2311	C
ETS	seq_13	C	-7.5	C-C	4.40308	0.4	0.15	140.5	C1'-exo	3	0.18	not measured	38.9298	C
ETS	seq_13	C	-6.5	T-C	4.22437	1.1	-0.46	145.5	C2'-endo	5	0.3	not measured	38.6971	C
ETS	seq_13	C	-5.5	T-T	4.26094	1	-0.11	141.6	C1'-exo	5	-0.18	not measured	37.2633	T
ETS	seq_13	C	-0.5	C-C	3.84556	2	-1.27	93.9	O4'-endo	5	-0.4	not measured	35.6024	C
ETS	seq_13	C	0.5	T-C	3.92819	1.1	-0.05	120.5	C1'-exo	9	-0.47	not measured	24.0254	C
ETS	seq_13	C	1.5	T-T	3.84394	1.7	-0.37	115.1	C1'-exo	7	-0.26	not measured	34.7576	T
ETS	seq_13	C	2.5	C-T	4.85545	0	0.54	145.4	C2'-endo	5	-0.59	not measured	40.3422	T
ETS	seq_13	C	3.5	C-C	3.58737	3.1	-1.14	138.9	C1'-exo	1	-0.4	not measured	31.524	C
ETS	seq_13	C	4.5	C-C	4.15085	1.5	-0.31	146.3	C2'-endo	11	0.39	not measured	36.3113	C
ETS	seq_13	C	5.5	C-C	4.37831	0.5	0.08	150.8	C2'-endo	4	0.02	not measured	39.2792	C
ETS	seq_13	B	7.5	C-T	4.48405	0.5	-0.27	133.4	C1'-exo	5	-0.16	not measured	37.3335	C
ETS	seq_13	C	9.5	C-C	4.49545	0.5	0.08	151.6	C2'-endo	4	0.19	not measured	37.1233	C
ETS	seq_14	C	-8.5	T-C	4.25853	1	-0.33	145.6	C2'-endo	6	0.1	not measured	38.1762	C
ETS	seq_14	C	-7.5	C-T	4.28745	0.7	0.04	139.5	C1'-exo	5	-0.3	not measured	36.0797	T
ETS	seq_14	C	-6.5	C-C	4.2617	0.5	-0.01	137.7	C1'-exo	4	-0.06	not measured	36.3628	C
ETS	seq_14	C	-5.5	C-C	4.14175	0.9	-0.29	140.5	C1'-exo	6	-0.01	not measured	36.5512	C
ETS	seq_14	C	-4.5	T-C	4.17432	0.8	-0.25	140.2	C1'-exo	4	-0.14	not measured	36.8038	C
ETS	seq_14	B	-2.5	C-C	4.15411	0.1	-0.2	106.4	O4'-endo	9	-1.01	not measured	27.107	C
ETS	seq_14	C	-0.5	C-C	3.84415	2.3	-1.27	136.6	C1'-exo	9	-0.31	not measured	32.9318	C
ETS	seq_14	C	0.5	T-C	3.89739	1.1	-0.1	121.1	C1'-exo	10	-0.47	not measured	23.9999	C
ETS	seq_14	C	1.5	T-T	3.83699	1.6	-0.36	117	C1'-exo	7	-0.31	not measured	34.5365	T
ETS	seq_14	C	2.5	C-T	4.8355	0	0.53	145.4	C2'-endo	5	-0.64	not measured	39.4029	T
ETS	seq_14	C	3.5	C-C	3.57236	3.1	-1.15	140.4	C1'-exo	1	-0.48	not measured	31.2086	C
ETS	seq_14	C	4.5	C-C	4.19288	1.4	-0.26	145.9	C2'-endo	12	0.27	not measured	34.5084	C
ETS	seq_14	B	6.5	C-T	4.45777	0.5	-0.32	134.1	C1'-exo	5	-0.31	not measured	35.2016	C
ETS	seq_14	C	8.5	C-C	4.18793	1.2	-0.15	148.6	C2'-endo	8	0	not measured	33.5381	C
ETS	seq_14	C	9.5	T-C	4.24896	1	-0.33	142.6	C1'-exo	3	0.1	not measured	38.1079	C
ETS	seq_15	B	-8.5	C-T	4.58064	0.4	-0.2	24.1	C3'-endo	14	-0.58	not measured	31.0176	C
ETS	seq_15	B	-7.5	T-T	4.34781	0.7	-0.02	151.8	C2'-endo	6	-0.33	not measured	37.2858	T
ETS	seq_15	B	-6.5	T-C	4.17869	0.9	0.31	141.2	C1'-exo	4	0.01	not measured	39.5126	T
ETS	seq_15	B	-5.5	C-C	4.11438	1.3	0.35	147.7	C2'-endo	7	0.14	not measured	35.3766	C
ETS	seq_15	C	-3.5	C-C	4.36437	0.1	0.4	145.7	C2'-endo	7	-0.74	not measured	29.835	C
ETS	seq_15	C	-0.5	C-C	3.82891	1.9	-1.2	91.5	O4'-endo	5	-0.44	not measured	35.412	C
ETS	seq_15	C	0.5	T-C	3.90652	1.2	-0.05	119.2	C1'-exo	10	-0.47	not measured	23.5317	C
ETS	seq_15	C	1.5	T-T	3.77455	1.8	-0.39	111.6	C1'-exo	7	-0.24	not measured	34.5032	T
ETS	seq_15	C	2.5	C-T	4.8823	0	0.59	145.1	C2'-endo	6	-0.55	not measured	40.3895	T
ETS	seq_15	C	3.5	C-C	3.59646	3.2	-1.13	136.8	C1'-exo	2	-0.37	not measured	30.8283	C
ETS	seq_15	C	4.5	C-C	4.09925	1.6	-0.29	144.9	C2'-endo	12	0.39	not measured	34.8236	C
ETS	seq_15	C	5.5	T-C	4.20286	1.1	-0.42	150.7	C2'-endo	3	0.14	not measured	41.924	C
ETS	seq_15	C	6.5	C-T	4.47697	0.4	0.42	146.2	C2'-endo	6	-0.18	not measured	35.1022	T
ETS	seq_15	B	8.5	C-T	4.44667	0.5	-0.27	139.7	C1'-exo	4	-0.3	not measured	38.0301	C
ETS	seq_16	B	-8.5	C-C	4.43451	0.5	-0.02	159.4	C2'-endo	4	-0.17	not measured	36.6159	C
ETS	seq_16	C	-6.5	C-C	4.20311	0.8	-0.04	145.6	C2'-endo	5	-0.14	not measured	33.0251	C
ETS	seq_16	C	-5.5	T-C	4.15744	1.1	-0.37	135.8	C1'-exo	4	0	not measured	35.8962	C
ETS	seq_16	C	-4.5	T-T	4.22201	0.9	-0.08	129.1	C1'-exo	5	-0.33	not measured	34.935	T
ETS	seq_16	B	-2.5	C-T	4.29297	0.1	-0.18	110.4	C1'-exo	6	-0.8	not measured	30.819	C
ETS	seq_16	C	-0.5	C-C	3.87252	2	-1.11	136.1	C1'-exo	9	-0.34	not measured	33.4681	C
ETS	seq_16	C	0.5	T-C	3.90209	1.2	-0.14	118.9	C1'-exo	9	-0.49	not measured	24.6883	C
ETS	seq_16	C	1.5	T-T	3.83717	1.6	-0.33	114.3	C1'-exo	7	-0.3	not measured	33.6512	T
ETS	seq_16	C	2.5	C-T	4.84353	0	0.53	145.1	C2'-endo	6	-0.58	not measured	39.5613	T
ETS	seq_16	C	3.5	C-C	3.58138	2.9	-1.08	144.2	C2'-endo	0	-0.49	not measured	31.3953	C
ETS	seq_16	C	4.5	T-C	4.08729	1.7	-0.41	143.4	C1'-exo	11	0.24	not measured	34.2127	C
ETS	seq_16	C	5.5	C-T	4.33573	0.7	0.08	148.1	C2'-endo	5	-0.34	not measured	36.3621	T
ETS	seq_17	C	-6.5	T-C	4.16265	1.4	-0.63	141.9	C1'-exo	6	0.29	not measured	38.3618	C
ETS	seq_17	C	-5.5	T-T	4.29208	0.7	0.04	140.2	C1'-exo	5	-0.28	not measured	35.5888	T
ETS	seq_17	B	-3.5	C-C	3.87487	0.9	0.43	122.2	C1'-exo	7	-0.86	not measured	32.7454	C
ETS	seq_17	B	-2.5	C-C	4.13563	0	-0.19	115.9	C1'-exo	7	-0.94	not measured	27.7373	C
ETS	seq_17	C	-0.5	C-C	3.82496	2.2	-1.32	114.4	C1'-exo	7	-0.38	not measured	34.6324	C
ETS	seq_17	C	0.5	T-C	3.91164	1.1	-0.09	120.4	C1'-exo	9	-0.5	not measured	24.5226	C
ETS	seq_17	C	1.5	T-T	3.85056	1.6	-0.35	115.9	C1'-exo	7	-0.32	not measured	34.362	T
ETS	seq_17	C	2.5	C-T	4.86787	0	0.59	145	C2'-endo	5	-0.57	not measured	38.911	T
ETS	seq_17	C	3.5	C-C	3.67422	3.1	-1.19	139.2	C1'-exo	2	-0.38	not measured	33.0804	C
ETS	seq_17	C	6.5	C-C	4.22834	0.9	-0.08	145.3	C2'-endo	6	0.04	not measured	34.1274	C
ETS	seq_17	C	7.5	T-C	4.24063	1	-0.36	145.1	C2'-endo	4	0.16	not measured	40.294	C
ETS	seq_17	C	8.5	C-T	4.47566	0.4	0.23	146.8	C2'-endo	4	-0.32	not measured	37.9533	T
ETS	seq_18	C	-8.5	T-C	4.22263	1.1	-0.37	143	C1'-exo	7	0.06	not measured	37.582	C
ETS	seq_18	C	-7.5	C-T	4.39755	0.4	0.3	140.2	C1'-exo	5	-0.36	not measured	34.4794	T
ETS	seq_18	C	-6.5	C-C	4.19622	0.7	-0.14	128.6	C1'-exo	4	-0.15	not measured	34.7838	C
ETS	seq_18	C	-5.5	T-C	3.99867	1.6	-0.6	128.1	C1'-exo	6	-0.05	not measured	35.8816	C
ETS	seq_18	C	-4.5	T-T	4.17761	1	-0.06	133.6	C1'-exo	5	-0.31	not measured	34.9771	T
ETS	seq_18	C	-3.5	C-T	4.65225	0	0.75	148	C2'-endo	5	-0.77	not measured	31.0004	T
ETS	seq_18	C	-0.5	C-C	3.83882	2.4	-1.37	97.4	O4'-endo	7	-0.32	not measured	35.6403	C
ETS	seq_18	C	0.5	T-C	3.92448	1.3	-0.13	118.5	C1'-exo	10	-0.44	not measured	24.896	C
ETS	seq_18	C	1.5	T-T	3.83869	1.7	-0.36	113	C1'-exo	7	-0.29	not measured	33.6335	T
ETS	seq_18	C	2.5	C-T	4.8996	0	0.65	145.3	C2'-endo	6	-0.57	not measured	37.9085	T
ETS	seq_18	C	3.5	C-C	3.61055	2.8	-1.07	143.2	C1'-exo	1	-0.44	not measured	31.4999	C
ETS	seq_18	C	4.5	T-C	4.01154	2.1	-0.65	142.9	C1'-exo	11	0.19	not measured	35.2856	C
ETS	seq_18	C	5.5	C-T	4.41474	0.6	0.2	148.4	C2'-endo	5	-0.26	not measured	37.6797	T
ETS	seq_18	C	8.5	C-T	4.38049	0.5	0.2	139.4	C1'-exo	5	-0.26	not measured	36.5207	T
ETS	seq_18	C	9.5	C-C	4.50807	0.2	0.13	147.1	C2'-endo	3	-0.21	not measured	37.7326	C
ETS	seq_19	B	-8.5	C-T	4.62083	0.3	-0.25	29.1	C3'-endo	13	-0.58	not measured	30.3326	C
ETS	seq_19	B	-7.5	T-T	4.39172	0.7	0.03	151.7	C2'-endo	6	-0.27	not measured	37.7137	T
ETS	seq_19	B	-6.5	T-C	4.17477	1.1	0.5	143	C1'-exo	5	0.11	not measured	39.8511	T
ETS	seq_19	B	-5.5	C-C	4.21617	0.6	0.06	142.6	C1'-exo	4	-0.14	not measured	36.5119	C
ETS	seq_19	B	-4.5	C-T	4.38234	0.4	-0.31	128.9	C1'-exo	6	-0.3	not measured	34.5253	C
ETS	seq_19	B	-3.5	T-C	3.7545	2	0.89	141.2	C1'-exo	5	-0.35	not measured	36.4912	T
ETS	seq_19	B	-2.5	C-C	4.10542	0.1	-0.23	112.8	C1'-exo	9	-0.82	not measured	28.3984	C
ETS	seq_19	C	-0.5	C-C	3.83434	2.3	-1.26	136.7	C1'-exo	10	-0.33	not measured	32.9324	C
ETS	seq_19	C	0.5	T-C	3.91487	1.1	-0.09	121.8	C1'-exo	10	-0.5	not measured	23.868	C
ETS	seq_19	C	1.5	T-T	3.82974	1.7	-0.37	115.5	C1'-exo	7	-0.33	not measured	34.0574	T
ETS	seq_19	C	2.5	C-T	4.85314	0	0.56	144.3	C2'-endo	5	-0.65	not measured	38.9811	T
ETS	seq_19	C	3.5	C-C	3.56817	3	-1.18	135	C1'-exo	0	-0.5	not measured	31.2063	C
ETS	seq_19	C	4.5	C-C	4.10297	1.5	-0.2	144.2	C2'-endo	11	0.2	not measured	33.6071	C
ETS	seq_19	C	5.5	C-C	4.24311	0.8	-0.25	144	C2'-endo	4	-0.04	not measured	38.7526	C
ETS	seq_19	B	9.5	C-T	4.28776	1.2	0.15	137.4	C1'-exo	9	0.03	not measured	38.7124	C
ETS	seq_2	B	-8.5	C-C	4.50312	0.1	-0.2	156.5	C2'-endo	2	-0.33	not measured	37.7599	C
ETS	seq_2	C	-6.5	C-C	4.15562	1.2	-0.3	144.8	C2'-endo	8	0.09	not measured	34.1791	C
ETS	seq_2	C	-5.5	T-C	4.16254	0.9	-0.29	145	C2'-endo	2	-0.15	not measured	38.0391	C
ETS	seq_2	C	-4.5	T-T	4.21314	0.9	-0.09	138.5	C1'-exo	4	-0.38	not measured	37.3261	T
ETS	seq_2	C	-3.5	C-T	4.65422	0	0.69	147.5	C2'-endo	5	-0.73	not measured	30.9471	T
ETS	seq_2	C	-0.5	C-C	3.86597	2.2	-1.24	132.1	C1'-exo	10	-0.3	not measured	32.3191	C
ETS	seq_2	C	0.5	T-C	3.91188	1.1	-0.1	123.5	C1'-exo	9	-0.48	not measured	24.9249	C
ETS	seq_2	C	1.5	T-T	3.85076	1.6	-0.32	114.9	C1'-exo	7	-0.33	not measured	34.1621	T
ETS	seq_2	C	2.5	C-T	4.86044	0	0.6	144.3	C2'-endo	5	-0.68	not measured	39.6031	T
ETS	seq_2	C	3.5	C-C	3.5835	3.1	-1.13	139	C1'-exo	2	-0.46	not measured	29.7274	C
ETS	seq_2	C	4.5	C-C	4.10483	1.5	-0.18	145	C2'-endo	12	0.34	not measured	33.0309	C
ETS	seq_2	C	5.5	T-C	4.17393	1	-0.38	148.9	C2'-endo	4	0.07	not measured	40.0695	C
ETS	seq_2	C	6.5	T-T	4.20529	1.1	-0.16	138.6	C1'-exo	5	-0.1	not measured	38.2658	T
ETS	seq_2	B	8.5	C-C	4.22834	0.5	-0.1	142.6	C1'-exo	6	-0.33	not measured	32.8808	C
ETS	seq_2	B	9.5	C-C	4.34439	1.2	0.38	183.5	C3'-exo	7	0.23	not measured	39.585	C
ETS	seq_20	C	-8.5	T-C	4.33319	1.1	-0.42	146.4	C2'-endo	9	0.55	not measured	40.1232	C
ETS	seq_20	C	-7.5	C-T	4.37495	0.4	0.29	144.2	C2'-endo	4	-0.32	not measured	35.3571	T
ETS	seq_20	C	-6.5	T-C	4.20481	0.8	-0.34	136.3	C1'-exo	2	-0.01	not measured	38.7451	C
ETS	seq_20	C	-5.5	T-T	4.19533	1.1	-0.14	139.9	C1'-exo	5	-0.28	not measured	37.241	T
ETS	seq_20	C	-4.5	C-T	4.49067	0.3	0.27	145.9	C2'-endo	4	-0.51	not measured	36.511	T
ETS	seq_20	C	-3.5	C-C	4.21104	0.2	0.29	129.7	C1'-exo	6	-0.77	not measured	30.6472	C
ETS	seq_20	C	-2.5	T-C	3.92437	1.7	-0.75	129.7	C1'-exo	7	-0.34	not measured	36.194	C
ETS	seq_20	C	-1.5	C-T	4.55363	0.1	0.67	145.7	C2'-endo	10	-0.4	not measured	26.5578	T
ETS	seq_20	C	-0.5	C-C	3.78834	1.8	-1.29	87.4	O4'-endo	5	-0.54	not measured	35.5522	C
ETS	seq_20	C	0.5	T-C	3.8893	1.2	-0.2	116.9	C1'-exo	10	-0.5	not measured	24.4196	C
ETS	seq_20	C	1.5	T-T	3.81005	1.7	-0.39	116.3	C1'-exo	7	-0.29	not measured	33.3991	T
ETS	seq_20	C	2.5	C-T	4.83251	0	0.49	145.6	C2'-endo	6	-0.54	not measured	40.3164	T
ETS	seq_20	C	3.5	C-C	3.58114	2.9	-1.08	141.6	C1'-exo	1	-0.38	not measured	30.5469	C
ETS	seq_20	C	4.5	T-C	4.09232	1.6	-0.32	143.1	C1'-exo	11	0.24	not measured	33.2152	C
ETS	seq_20	B	6.5	C-T	4.4817	0.3	-0.21	108.1	C1'-exo	5	-0.54	not measured	34.9872	C
ETS	seq_20	B	7.5	T-T	4.3508	0.7	-0.16	143.3	C1'-exo	5	-0.21	not measured	36.6947	T
ETS	seq_20	B	8.5	T-C	4.22325	1	0.26	142.9	C1'-exo	5	0.1	not measured	39.0645	T
ETS	seq_20	B	9.5	C-C	4.51335	0.8	0.4	145.3	C2'-endo	10	0.88	not measured	42.6736	C
ETS	seq_21	B	-8.5	C-T	4.58221	0.2	-0.24	80.6	O4'-endo	9	-0.65	not measured	32.4699	C
ETS	seq_21	B	-7.5	T-T	4.2918	0.7	-0.03	147	C2'-endo	5	-0.42	not measured	35.4599	T
ETS	seq_21	B	-6.5	T-C	4.16491	0.8	0.17	136.8	C1'-exo	5	-0.21	not measured	36.6036	T
ETS	seq_21	B	-5.5	C-C	4.05816	1.2	0.42	144	C2'-endo	7	-0.13	not measured	33.8194	C
ETS	seq_21	C	-3.5	C-C	4.41525	0	0.58	140.7	C1'-exo	6	-0.78	not measured	29.0881	C
ETS	seq_21	C	-0.5	C-C	3.87749	2	-1.19	127.7	C1'-exo	8	-0.38	not measured	32.7765	C
ETS	seq_21	C	0.5	T-C	3.93516	1	-0.04	119.6	C1'-exo	9	-0.5	not measured	22.9765	C
ETS	seq_21	C	1.5	T-T	3.8378	1.6	-0.36	112.7	C1'-exo	6	-0.32	not measured	34.0311	T
ETS	seq_21	C	2.5	C-T	4.85899	0	0.51	144.2	C2'-endo	5	-0.63	not measured	39.9357	T
ETS	seq_21	C	3.5	T-C	3.60986	2.9	-0.98	129.4	C1'-exo	2	-0.4	not measured	27.6998	C
ETS	seq_21	C	4.5	T-T	4.04809	1.8	-0.25	143.5	C1'-exo	11	0.09	not measured	33.8796	T
ETS	seq_21	C	5.5	C-T	4.3409	0.6	0.11	146.1	C2'-endo	5	-0.24	not measured	36.9586	T
ETS	seq_21	C	6.5	T-C	4.12839	0.9	-0.3	134.7	C1'-exo	4	-0.12	not measured	36.9759	C
ETS	seq_21	C	7.5	T-T	4.23224	1	-0.04	138.5	C1'-exo	5	-0.19	not measured	37.4679	T
ETS	seq_21	C	8.5	C-T	4.3931	0.5	0.04	142.3	C1'-exo	4	-0.41	not measured	38.6861	T
ETS	seq_22	B	-8.5	C-C	4.47953	0.4	0	157.8	C2'-endo	3	-0.19	not measured	36.456	C
ETS	seq_22	C	-6.5	C-C	4.2407	0.9	-0.14	144.8	C2'-endo	6	0.01	not measured	34.5276	C
ETS	seq_22	C	-5.5	T-C	4.18421	0.9	-0.29	142.2	C1'-exo	3	-0.1	not measured	38.036	C
ETS	seq_22	C	-4.5	T-T	4.21164	1	-0.09	135.9	C1'-exo	4	-0.33	not measured	37.1985	T
ETS	seq_22	C	-3.5	C-T	4.67444	0	0.68	148.2	C2'-endo	4	-0.75	not measured	31.2641	T
ETS	seq_22	C	-0.5	C-C	3.875	2.2	-1.23	123.5	C1'-exo	9	-0.3	not measured	33.5974	C
ETS	seq_22	C	0.5	T-C	3.94315	1.1	-0.08	122	C1'-exo	10	-0.45	not measured	23.5344	C
ETS	seq_22	C	1.5	T-T	3.86249	1.6	-0.36	115.2	C1'-exo	7	-0.26	not measured	34.3759	T
ETS	seq_22	C	2.5	C-T	4.8782	0	0.52	144.9	C2'-endo	5	-0.61	not measured	39.4829	T
ETS	seq_22	C	3.5	T-C	3.67674	2.8	-0.93	135.8	C1'-exo	1	-0.37	not measured	29.049	C
ETS	seq_22	C	4.5	T-T	4.09924	1.7	-0.27	143.2	C1'-exo	10	0.01	not measured	34.3394	T
ETS	seq_22	C	5.5	C-T	4.3589	0.7	-0.03	148.6	C2'-endo	4	-0.22	not measured	39.243	T
ETS	seq_22	C	6.5	C-C	4.21835	0.8	-0.19	135.6	C1'-exo	4	-0.12	not measured	37.7373	C
ETS	seq_22	C	7.5	C-C	4.35946	0.6	-0.11	142.2	C1'-exo	4	0.12	not measured	39.1234	C
ETS	seq_22	C	8.5	C-C	4.2173	0.9	-0.22	141.9	C1'-exo	4	-0.04	not measured	35.9844	C
ETS	seq_22	C	9.5	T-C	4.24667	1.2	-0.44	135.7	C1'-exo	3	0.19	not measured	39.1072	C
ETS	seq_23	C	-6.5	C-C	4.14614	1.2	-0.35	145.4	C2'-endo	6	0.01	not measured	35.1769	C
ETS	seq_23	C	-5.5	T-C	4.11769	1	-0.31	138.9	C1'-exo	4	-0.16	not measured	36.3362	C
ETS	seq_23	C	-4.5	T-T	4.15768	1	-0.13	133.6	C1'-exo	4	-0.34	not measured	35.8553	T
ETS	seq_23	C	-3.5	C-T	4.61438	0.1	0.64	147.9	C2'-endo	5	-0.74	not measured	31.1873	T
ETS	seq_23	C	-0.5	C-C	3.86864	2.2	-1.2	133.6	C1'-exo	10	-0.26	not measured	32.4806	C
ETS	seq_23	C	0.5	T-C	3.92632	1.1	-0.11	122.6	C1'-exo	9	-0.44	not measured	24.4637	C
ETS	seq_23	C	1.5	T-T	3.83791	1.7	-0.38	114.7	C1'-exo	7	-0.22	not measured	34.848	T
ETS	seq_23	C	2.5	C-T	4.81481	0	0.5	144.1	C2'-endo	5	-0.59	not measured	39.3461	T
ETS	seq_23	C	3.5	T-C	3.62913	3.1	-1.06	134.3	C1'-exo	2	-0.27	not measured	29.0333	C
ETS	seq_23	C	4.5	C-T	4.23874	1.1	0	147.3	C2'-endo	9	0	not measured	35.3362	T
ETS	seq_23	C	7.5	C-T	4.3893	0.6	0.13	138.8	C1'-exo	5	-0.17	not measured	35.9714	T
ETS	seq_23	C	8.5	C-C	4.27287	0.6	-0.13	140.5	C1'-exo	2	-0.31	not measured	37.0855	C
ETS	seq_24	B	-8.5	C-C	4.53951	0.2	-0.18	151	C2'-endo	3	-0.33	not measured	36.7286	C
ETS	seq_24	C	-6.5	C-C	4.16983	1.1	-0.26	143.2	C1'-exo	6	0.04	not measured	35.0235	C
ETS	seq_24	C	-5.5	T-C	4.149	1	-0.29	141.1	C1'-exo	3	-0.11	not measured	38.0903	C
ETS	seq_24	C	-4.5	T-T	4.20078	1	-0.08	135.4	C1'-exo	4	-0.34	not measured	37.0365	T
ETS	seq_24	C	-3.5	C-T	4.66042	0	0.71	147.2	C2'-endo	5	-0.76	not measured	30.4054	T
ETS	seq_24	C	-0.5	C-C	3.84425	2.1	-1.26	103.4	O4'-endo	7	-0.35	not measured	34.8375	C
ETS	seq_24	C	0.5	T-C	3.93406	1.1	-0.09	120.6	C1'-exo	9	-0.46	not measured	24.129	C
ETS	seq_24	C	1.5	T-T	3.85547	1.6	-0.31	115.2	C1'-exo	6	-0.31	not measured	34.799	T
ETS	seq_24	C	2.5	C-T	4.85413	0	0.53	145.3	C2'-endo	6	-0.61	not measured	39.2137	T
ETS	seq_24	C	3.5	T-C	3.67713	3	-1.02	129.6	C1'-exo	3	-0.35	not measured	29.5071	C
ETS	seq_24	B	5.5	C-T	4.16056	1.2	0.1	130.5	C1'-exo	8	-0.18	not measured	34.1012	C
ETS	seq_24	B	8.5	C-C	4.2499	0.7	-0.01	142.2	C1'-exo	4	-0.15	not measured	37.094	C
ETS	seq_25	C	-7.5	C-T	4.34319	0.8	0.01	143.1	C1'-exo	4	-0.12	not measured	38.7886	T
ETS	seq_25	C	-6.5	C-C	4.42577	0.4	0	140.6	C1'-exo	2	0.02	not measured	40.4409	C
ETS	seq_25	B	-2.5	C-C	4.20066	0	-0.41	107.5	O4'-endo	8	-0.9	not measured	27.0577	C
ETS	seq_25	C	-0.5	C-C	3.8135	2.3	-1.28	134.3	C1'-exo	9	-0.32	not measured	33.3694	C
ETS	seq_25	C	0.5	T-C	3.90821	1	-0.04	120.1	C1'-exo	10	-0.49	not measured	23.2868	C
ETS	seq_25	C	1.5	T-T	3.82261	1.7	-0.42	114.8	C1'-exo	6	-0.25	not measured	34.8934	T
ETS	seq_25	C	2.5	C-T	4.86322	0	0.51	146	C2'-endo	5	-0.6	not measured	40.0146	T
ETS	seq_25	C	3.5	T-C	3.62882	3.1	-1.04	129.3	C1'-exo	3	-0.27	not measured	28.884	C
ETS	seq_25	C	4.5	C-T	4.14067	1.3	-0.11	146.3	C2'-endo	9	0.07	not measured	36.1299	T
ETS	seq_25	C	5.5	C-C	4.28347	0.8	-0.29	149.7	C2'-endo	4	0.07	not measured	42.1237	C
ETS	seq_25	C	6.5	C-C	4.44364	0.3	0.24	144.3	C2'-endo	2	-0.07	not measured	37.9986	C
ETS	seq_25	B	8.5	C-T	4.45298	0.5	-0.18	135.9	C1'-exo	4	-0.29	not measured	38.0943	C
ETS	seq_26	C	-7.5	C-T	4.32416	0.7	0.11	143	C1'-exo	4	-0.24	not measured	37.2157	T
ETS	seq_26	C	-6.5	C-C	4.26809	0.6	0	140.5	C1'-exo	3	-0.05	not measured	37.4821	C
ETS	seq_26	C	-5.5	T-C	4.18564	1.1	-0.53	140.1	C1'-exo	4	0.02	not measured	39.2089	C
ETS	seq_26	B	-3.5	C-C	3.89758	0.8	0.33	118.7	C1'-exo	6	-1.01	not measured	31.1001	C
ETS	seq_26	B	-2.5	C-C	4.17159	0	-0.24	110.9	C1'-exo	7	-1.02	not measured	27.5874	C
ETS	seq_26	C	-0.5	C-C	3.81499	2.2	-1.31	131.5	C1'-exo	9	-0.34	not measured	33.3238	C
ETS	seq_26	C	0.5	T-C	3.89422	1.1	-0.12	117.2	C1'-exo	10	-0.52	not measured	23.4888	C
ETS	seq_26	C	1.5	T-T	3.81791	1.7	-0.4	114.7	C1'-exo	6	-0.29	not measured	34.3882	T
ETS	seq_26	C	2.5	C-T	4.8674	0	0.56	144.4	C2'-endo	5	-0.6	not measured	39.915	T
ETS	seq_26	C	3.5	T-C	3.60675	3.2	-1.18	133.4	C1'-exo	2	-0.26	not measured	30.5753	C
ETS	seq_26	C	4.5	C-T	4.17888	1.3	-0.11	145.9	C2'-endo	10	0.05	not measured	36.2957	T
ETS	seq_26	B	8.5	T-C	4.34111	0.7	0.29	144.9	C2'-endo	3	0.16	not measured	41.1118	T
ETS	seq_26	B	9.5	C-C	4.29307	0.9	0.26	142	C1'-exo	7	0.17	not measured	39.0559	C
ETS	seq_27	B	-8.5	C-C	4.54296	0.3	-0.03	154.6	C2'-endo	4	-0.26	not measured	37.5712	C
ETS	seq_27	C	-6.5	C-C	4.27425	0.9	-0.21	146.8	C2'-endo	5	0.06	not measured	37.61	C
ETS	seq_27	C	-5.5	C-C	4.27678	0.6	-0.08	145.4	C2'-endo	4	-0.06	not measured	37.3507	C
ETS	seq_27	C	-4.5	T-C	4.21743	0.9	-0.36	138.5	C1'-exo	3	-0.07	not measured	37.1206	C
ETS	seq_27	B	-2.5	C-C	4.1201	0.1	-0.16	105.7	O4'-endo	10	-1.05	not measured	27.0457	C
ETS	seq_27	C	-0.5	C-C	3.86211	2.2	-1.23	136.4	C1'-exo	9	-0.33	not measured	32.4717	C
ETS	seq_27	C	0.5	T-C	3.90189	1.2	-0.14	119.7	C1'-exo	10	-0.46	not measured	23.6774	C
ETS	seq_27	C	1.5	T-T	3.84612	1.6	-0.34	115.8	C1'-exo	7	-0.27	not measured	33.536	T
ETS	seq_27	C	2.5	C-T	4.8207	0	0.41	145.3	C2'-endo	5	-0.62	not measured	40.486	T
ETS	seq_27	C	3.5	T-C	3.62152	3	-0.99	133.2	C1'-exo	2	-0.33	not measured	29.0096	C
ETS	seq_27	C	4.5	C-T	4.15288	1.3	-0.11	146.4	C2'-endo	10	0.07	not measured	36.351	T
ETS	seq_27	C	5.5	C-C	4.27693	0.7	-0.24	148.8	C2'-endo	4	0	not measured	40.6683	C
ETS	seq_27	C	6.5	C-C	4.3183	0.4	0.17	141.6	C1'-exo	3	-0.19	not measured	35.5163	C
ETS	seq_27	C	7.5	T-C	4.14856	1.2	-0.46	140.1	C1'-exo	5	0.09	not measured	38.4552	C
ETS	seq_27	C	8.5	C-T	4.46361	0.5	0.23	144.9	C2'-endo	5	-0.27	not measured	37.4508	T
ETS	seq_28	C	-8.5	T-C	4.17386	1.2	-0.47	143.5	C1'-exo	7	0.07	not measured	37.2831	C
ETS	seq_28	C	-7.5	C-T	4.28893	0.7	0.14	138.7	C1'-exo	4	-0.35	not measured	35.7997	T
ETS	seq_28	C	-6.5	C-C	4.24342	0.6	-0.06	137.1	C1'-exo	4	-0.08	not measured	36.908	C
ETS	seq_28	C	-5.5	T-C	4.17401	1.1	-0.44	137.2	C1'-exo	4	-0.05	not measured	38.5844	C
ETS	seq_28	C	-0.5	C-C	3.81414	2.1	-1.31	88.4	O4'-endo	6	-0.39	not measured	35.7749	C
ETS	seq_28	C	0.5	T-C	3.91488	1.2	-0.08	117.8	C1'-exo	10	-0.44	not measured	23.2818	C
ETS	seq_28	C	1.5	T-T	3.8217	1.7	-0.36	112.9	C1'-exo	6	-0.27	not measured	34.3165	T
ETS	seq_28	C	2.5	C-T	4.85042	0	0.52	144.9	C2'-endo	5	-0.59	not measured	40.181	T
ETS	seq_28	C	3.5	T-C	3.64117	3.1	-1.08	130.1	C1'-exo	3	-0.33	not measured	29.0091	C
ETS	seq_28	C	4.5	C-T	4.13492	1.4	-0.19	145.6	C2'-endo	10	0.07	not measured	36.777	T
ETS	seq_28	C	5.5	C-C	4.28114	0.5	0.08	144.9	C2'-endo	5	-0.03	not measured	36.9711	C
ETS	seq_28	C	6.5	T-C	4.15272	1.4	-0.53	138.9	C1'-exo	5	0.21	not measured	40.2303	C
ETS	seq_28	C	7.5	C-T	4.49583	0.3	0.44	147.1	C2'-endo	5	-0.3	not measured	35.0409	T
ETS	seq_28	B	9.5	C-T	4.34011	0.8	-0.03	136.6	C1'-exo	7	-0.26	not measured	37.788	C
ETS	seq_29	C	-7.5	C-C	4.26517	1.1	-0.3	147.7	C2'-endo	7	0.35	not measured	38.7003	C
ETS	seq_29	C	-6.5	T-C	4.26805	0.8	-0.22	145	C2'-endo	4	0.11	not measured	38.119	C
ETS	seq_29	C	-5.5	T-T	4.3035	0.7	0.05	141	C1'-exo	4	-0.3	not measured	35.353	T
ETS	seq_29	B	-3.5	C-C	3.86591	1.1	0.56	125.3	C1'-exo	7	-0.78	not measured	34.7965	C
ETS	seq_29	C	-1.5	C-T	4.61368	0	0.74	147.3	C2'-endo	9	-0.38	not measured	27.0536	T
ETS	seq_29	C	-0.5	C-C	3.8082	1.9	-1.25	90.9	O4'-endo	5	-0.47	not measured	36.158	C
ETS	seq_29	C	0.5	T-C	3.89797	1.2	-0.17	115.8	C1'-exo	10	-0.52	not measured	23.7971	C
ETS	seq_29	C	1.5	T-T	3.83652	1.6	-0.36	117.4	C1'-exo	7	-0.29	not measured	33.9183	T
ETS	seq_29	C	2.5	C-T	4.86724	0	0.54	147.5	C2'-endo	5	-0.59	not measured	39.6196	T
ETS	seq_29	C	3.5	T-C	3.62755	3.1	-1.15	127.6	C1'-exo	3	-0.29	not measured	29.4194	C
ETS	seq_29	C	4.5	C-T	4.16238	1.3	-0.1	147	C2'-endo	10	0.17	not measured	36.0279	T
ETS	seq_29	C	5.5	C-C	4.29353	0.5	-0.04	148.8	C2'-endo	5	-0.08	not measured	38.0322	C
ETS	seq_29	C	6.5	T-C	4.19813	0.8	-0.15	140.2	C1'-exo	4	-0.16	not measured	35.9826	C
ETS	seq_29	C	9.5	C-C	4.52855	0.5	-0.03	144.7	C2'-endo	3	0.08	not measured	39.0168	C
ETS	seq_3	B	-7.5	C-C	4.23813	1	0.18	123.6	C1'-exo	6	-0.16	not measured	35.4293	C
ETS	seq_3	C	-5.5	C-T	4.39142	0.5	0.33	142.4	C1'-exo	4	-0.32	not measured	34.5871	T
ETS	seq_3	C	-4.5	C-C	4.18596	0.9	-0.4	135	C1'-exo	3	-0.22	not measured	38.9475	C
ETS	seq_3	C	-3.5	C-C	4.41558	0.1	0.57	140.8	C1'-exo	6	-0.75	not measured	28.6041	C
ETS	seq_3	C	-0.5	C-C	3.872	1.9	-1.23	97.3	O4'-endo	5	-0.43	not measured	35.3472	C
ETS	seq_3	C	0.5	T-C	3.9266	1.1	-0.07	118.5	C1'-exo	10	-0.49	not measured	23.7263	C
ETS	seq_3	C	1.5	T-T	3.85007	1.6	-0.33	112.6	C1'-exo	7	-0.33	not measured	33.6802	T
ETS	seq_3	C	2.5	C-T	4.81865	0	0.5	142.1	C1'-exo	6	-0.63	not measured	37.9267	T
ETS	seq_3	C	3.5	C-C	3.56328	2.6	-0.97	137.8	C1'-exo	1	-0.54	not measured	30.6778	C
ETS	seq_3	C	4.5	T-C	4.03484	1.8	-0.53	141.2	C1'-exo	11	0.17	not measured	32.8553	C
ETS	seq_3	B	8.5	T-C	4.3004	0.6	0.04	133.7	C1'-exo	3	-0.07	not measured	37.1882	T
ETS	seq_3	B	9.5	C-C	4.32234	1.4	0.67	139.8	C1'-exo	10	0.67	not measured	41.2825	C
ETS	seq_30	C	-8.5	T-T	4.24222	1.2	-0.23	142.6	C1'-exo	7	-0.08	not measured	37.3841	T
ETS	seq_30	C	-7.5	C-T	4.3984	0.5	0.16	141.3	C1'-exo	3	-0.38	not measured	36.6426	T
ETS	seq_30	C	-6.5	C-C	4.28528	0.6	-0.2	134.7	C1'-exo	3	-0.17	not measured	38.6984	C
ETS	seq_30	C	-3.5	C-C	4.33647	0.1	0.44	123.2	C1'-exo	6	-0.79	not measured	28.7384	C
ETS	seq_30	C	-0.5	C-C	3.85968	2	-1.23	106.7	O4'-endo	7	-0.38	not measured	34.1806	C
ETS	seq_30	C	0.5	T-C	3.93188	1.1	-0.09	118.8	C1'-exo	10	-0.47	not measured	23.8144	C
ETS	seq_30	C	1.5	T-T	3.85835	1.5	-0.29	114.4	C1'-exo	6	-0.3	not measured	33.6871	T
ETS	seq_30	C	2.5	C-T	4.83586	0	0.38	144.5	C2'-endo	5	-0.59	not measured	41.4402	T
ETS	seq_30	C	3.5	T-C	3.64829	2.9	-0.97	131.1	C1'-exo	2	-0.35	not measured	28.9476	C
ETS	seq_30	C	4.5	C-T	4.17694	1.3	-0.16	146.6	C2'-endo	10	0.04	not measured	35.9617	T
ETS	seq_30	C	5.5	C-C	4.26094	0.5	0.07	145	C2'-endo	5	-0.19	not measured	36.2466	C
ETS	seq_30	C	6.5	T-C	4.18957	1.3	-0.6	139.1	C1'-exo	4	0.19	not measured	40.9644	C
ETS	seq_30	C	7.5	C-T	4.50372	0.3	0.38	146.9	C2'-endo	5	-0.29	not measured	34.9199	T
ETS	seq_30	C	8.5	C-C	4.25346	0.5	-0.1	127.1	C1'-exo	3	-0.5	not measured	33.7282	C
ETS	seq_31	B	-7.5	T-C	4.1693	1.1	0.45	141.8	C1'-exo	5	-0.01	not measured	39.372	T
ETS	seq_31	B	-6.5	C-C	4.22052	1	0.21	140.3	C1'-exo	7	0.02	not measured	35.6492	C
ETS	seq_31	C	-4.5	T-T	4.25252	0.8	-0.05	143.4	C1'-exo	5	-0.28	not measured	35.9262	T
ETS	seq_31	B	-2.5	C-C	4.1299	0.1	-0.23	104.3	O4'-endo	10	-1.02	not measured	26.7538	C
ETS	seq_31	C	-0.5	C-C	3.84493	2.2	-1.24	134.5	C1'-exo	9	-0.32	not measured	33.0009	C
ETS	seq_31	C	0.5	T-C	3.89697	1.1	-0.1	117.8	C1'-exo	10	-0.53	not measured	23.1704	C
ETS	seq_31	C	1.5	T-T	3.82	1.5	-0.32	113.9	C1'-exo	7	-0.32	not measured	32.9114	T
ETS	seq_31	C	2.5	C-T	4.78537	0	0.41	143.8	C1'-exo	6	-0.61	not measured	39.7812	T
ETS	seq_31	C	3.5	T-C	3.59017	2.7	-0.88	139.5	C1'-exo	1	-0.34	not measured	28.465	C
ETS	seq_31	C	4.5	T-T	4.05435	1.6	-0.28	143.8	C1'-exo	11	0	not measured	34.879	T
ETS	seq_31	B	8.5	T-C	4.20759	0.9	0.25	146.5	C2'-endo	3	0.1	not measured	40.5174	T
ETS	seq_31	B	9.5	C-C	4.23864	0.9	0.26	141.2	C1'-exo	6	0.02	not measured	38.7105	C
ETS	seq_32	B	-8.5	C-C	4.51945	0.2	-0.16	158	C2'-endo	4	-0.35	not measured	34.3727	C
ETS	seq_32	C	-6.5	C-C	4.30121	0.6	0.05	146	C2'-endo	4	-0.11	not measured	34.943	C
ETS	seq_32	C	-5.5	T-C	4.22708	0.9	-0.3	140.9	C1'-exo	2	-0.05	not measured	38.1307	C
ETS	seq_32	C	-4.5	T-T	4.24374	0.9	-0.12	135	C1'-exo	4	-0.32	not measured	37.0788	T
ETS	seq_32	C	-3.5	T-T	4.44856	0.3	0.4	140.3	C1'-exo	4	-0.55	not measured	34.182	T
ETS	seq_32	C	-0.5	C-C	3.85417	2.2	-1.28	98.8	O4'-endo	7	-0.35	not measured	34.2841	C
ETS	seq_32	C	0.5	T-C	3.94237	1.1	-0.09	119.3	C1'-exo	9	-0.49	not measured	24.5619	C
ETS	seq_32	C	1.5	T-T	3.874	1.6	-0.36	116	C1'-exo	6	-0.31	not measured	34.0431	T
ETS	seq_32	C	2.5	C-T	4.86337	0	0.48	145	C2'-endo	5	-0.66	not measured	40.5016	T
ETS	seq_32	C	3.5	T-C	3.68978	2.8	-0.99	130.1	C1'-exo	3	-0.5	not measured	28.9239	C
ETS	seq_32	C	6.5	T-C	4.14769	1.5	-0.58	127.3	C1'-exo	5	0.09	not measured	38.0558	C
ETS	seq_32	C	9.5	C-C	4.48194	0.4	0.03	140.7	C1'-exo	3	-0.37	not measured	35.7683	C
ETS	seq_33	C	-7.5	C-C	4.31912	0.9	-0.14	144.4	C2'-endo	5	0.26	not measured	38.8654	C
ETS	seq_33	C	-6.5	C-C	4.39533	0.5	-0.01	148.6	C2'-endo	3	0.02	not measured	39.0058	C
ETS	seq_33	B	-2.5	C-C	4.16037	0.1	-0.31	112.4	C1'-exo	7	-0.89	not measured	27.4979	C
ETS	seq_33	C	-0.5	C-C	3.85155	2.1	-1.21	133.7	C1'-exo	9	-0.34	not measured	32.4594	C
ETS	seq_33	C	0.5	T-C	3.91442	1.1	-0.07	121.3	C1'-exo	10	-0.51	not measured	23.6117	C
ETS	seq_33	C	1.5	T-T	3.85558	1.5	-0.3	115	C1'-exo	6	-0.34	not measured	34.0577	T
ETS	seq_33	C	2.5	C-T	4.80342	0	0.38	146.3	C2'-endo	6	-0.57	not measured	39.8153	T
ETS	seq_33	C	3.5	T-C	3.60028	2.9	-0.98	113.4	C1'-exo	2	-0.44	not measured	28.0632	C
ETS	seq_33	B	9.5	C-C	4.30959	1	0.32	140.5	C1'-exo	7	0.07	not measured	40.7179	C
ETS	seq_34	C	-8.5	C-T	4.26548	0.8	0.17	142.7	C1'-exo	8	-0.26	not measured	32.5191	T
ETS	seq_34	C	-7.5	C-C	4.14846	1	-0.37	130.3	C1'-exo	4	-0.05	not measured	37.4914	C
ETS	seq_34	C	-6.5	T-C	4.10113	1.1	-0.37	136.3	C1'-exo	4	-0.12	not measured	36.9078	C
ETS	seq_34	C	-5.5	T-T	4.18831	1	0.02	132.7	C1'-exo	5	-0.33	not measured	34.0814	T
ETS	seq_34	C	-4.5	C-T	4.46534	0.3	0.16	143.2	C1'-exo	5	-0.52	not measured	35.6272	T
ETS	seq_34	C	-1.5	C-T	4.63847	0	0.81	149.7	C2'-endo	9	-0.42	not measured	26.2504	T
ETS	seq_34	C	-0.5	C-C	3.77874	1.9	-1.31	83	O4'-endo	4	-0.54	not measured	35.9195	C
ETS	seq_34	C	0.5	T-C	3.89091	1.3	-0.23	114.8	C1'-exo	10	-0.5	not measured	24.3235	C
ETS	seq_34	C	1.5	T-T	3.82997	1.7	-0.36	117.2	C1'-exo	6	-0.27	not measured	34.3271	T
ETS	seq_34	C	2.5	C-T	4.82763	0	0.41	146.4	C2'-endo	5	-0.55	not measured	40.8579	T
ETS	seq_34	C	3.5	T-C	3.57646	3.1	-1.07	130.6	C1'-exo	2	-0.28	not measured	29.3219	C
ETS	seq_34	C	4.5	C-T	4.21812	1.1	-0.02	147.5	C2'-endo	9	0.05	not measured	35.9555	T
ETS	seq_34	C	5.5	C-C	4.43293	0.1	0.3	151.9	C2'-endo	3	-0.28	not measured	38.1822	C
ETS	seq_34	B	7.5	C-C	4.28453	0.7	-0.01	135.6	C1'-exo	6	-0.16	not measured	34.2328	C
ETS	seq_34	C	9.5	C-T	4.68901	0.1	0.51	147.8	C2'-endo	5	-0.18	not measured	36.7152	T
ETS	seq_35	C	-6.5	T-T	4.2787	1	-0.14	138.1	C1'-exo	5	-0.04	not measured	38.0866	T
ETS	seq_35	C	-5.5	T-T	4.39766	0.6	0.08	140.8	C1'-exo	6	-0.27	not measured	37.8842	T
ETS	seq_35	B	-3.5	C-C	3.82458	1.1	0.45	126.3	C1'-exo	8	-0.83	not measured	32.6625	C
ETS	seq_35	B	-2.5	C-C	4.09972	0.1	-0.14	110.5	C1'-exo	7	-0.91	not measured	27.7125	C
ETS	seq_35	C	-0.5	C-C	3.79905	2.2	-1.38	90.9	O4'-endo	6	-0.4	not measured	35.8291	C
ETS	seq_35	C	0.5	T-C	3.90768	1.1	-0.1	115.8	C1'-exo	9	-0.51	not measured	23.6622	C
ETS	seq_35	C	1.5	T-T	3.84044	1.6	-0.36	113.2	C1'-exo	6	-0.29	not measured	33.9657	T
ETS	seq_35	C	2.5	C-T	4.88001	0	0.44	146.5	C2'-endo	6	-0.53	not measured	40.889	T
ETS	seq_35	C	3.5	T-C	3.69344	2.9	-1	121.6	C1'-exo	3	-0.37	not measured	31.1185	C
ETS	seq_35	B	9.5	T-T	4.2604	1.1	0.21	141.4	C1'-exo	8	-0.05	not measured	38.6568	T
ETS	seq_36	C	-8.5	C-C	4.31681	0.8	-0.18	147	C2'-endo	6	0.02	not measured	39.4608	C
ETS	seq_36	C	-5.5	T-C	4.22804	0.7	-0.12	143.7	C1'-exo	4	-0.15	not measured	35.3198	C
ETS	seq_36	B	-3.5	T-C	3.92182	1.2	0.54	116.6	C1'-exo	3	-0.55	not measured	34.0343	T
ETS	seq_36	B	-2.5	C-C	4.18723	0.1	-0.27	119.2	C1'-exo	7	-0.83	not measured	28.9069	C
ETS	seq_36	C	-0.5	C-C	3.86877	2.3	-1.25	136.4	C1'-exo	10	-0.24	not measured	33.1479	C
ETS	seq_36	C	0.5	T-C	3.90385	1.2	-0.1	119.5	C1'-exo	10	-0.47	not measured	23.3181	C
ETS	seq_36	C	1.5	T-T	3.83683	1.7	-0.38	116.1	C1'-exo	7	-0.24	not measured	34.4184	T
ETS	seq_36	C	2.5	C-T	4.83604	0	0.43	145.9	C2'-endo	4	-0.62	not measured	40.7737	T
ETS	seq_36	C	3.5	T-C	3.64377	3	-0.99	135.1	C1'-exo	2	-0.32	not measured	28.9756	C
ETS	seq_36	C	4.5	C-T	4.1769	1.3	-0.2	147.2	C2'-endo	9	0.13	not measured	37.5072	T
ETS	seq_36	C	5.5	C-C	4.28309	0.7	-0.11	148.2	C2'-endo	4	0	not measured	39.4907	C
ETS	seq_36	C	6.5	C-C	4.29149	0.7	-0.15	140.9	C1'-exo	3	0	not measured	38.9129	C
ETS	seq_37	B	-8.5	T-C	4.28785	1	0.35	142.5	C1'-exo	3	0.03	not measured	37.6093	T
ETS	seq_37	B	-7.5	C-C	4.15476	1.3	0.29	142.4	C1'-exo	9	-0.01	not measured	33.5131	C
ETS	seq_37	C	-5.5	T-T	4.3058	0.7	0.07	143.6	C1'-exo	5	-0.3	not measured	34.4433	T
ETS	seq_37	B	-3.5	C-C	3.8422	1.1	0.55	127	C1'-exo	7	-0.8	not measured	34.4579	C
ETS	seq_37	B	-2.5	C-C	4.14809	0	-0.26	112.3	C1'-exo	7	-0.96	not measured	26.9338	C
ETS	seq_37	C	-0.5	C-C	3.81521	2.3	-1.35	121.7	C1'-exo	8	-0.38	not measured	33.8274	C
ETS	seq_37	C	0.5	T-C	3.91997	1.1	-0.09	118.2	C1'-exo	10	-0.53	not measured	23.3068	C
ETS	seq_37	C	1.5	T-T	3.81457	1.7	-0.39	112.3	C1'-exo	7	-0.3	not measured	33.6847	T
ETS	seq_37	C	2.5	C-T	4.88459	0	0.57	144	C2'-endo	6	-0.53	not measured	38.6036	T
ETS	seq_37	C	3.5	T-C	3.65581	3	-1.1	136.3	C1'-exo	2	-0.24	not measured	30.1235	C
ETS	seq_37	C	4.5	T-T	4.14023	1.5	-0.19	144.1	C2'-endo	10	0.04	not measured	34.6972	T
ETS	seq_37	C	7.5	C-T	4.31129	0.8	0.06	136.7	C1'-exo	6	-0.26	not measured	35.7601	T
ETS	seq_37	B	9.5	C-C	4.29236	0.7	0.15	133.9	C1'-exo	5	-0.22	not measured	38.4969	C
ETS	seq_38	C	-7.5	C-C	4.2854	1	-0.15	147.5	C2'-endo	7	0.2	not measured	37.0291	C
ETS	seq_38	C	-6.5	T-C	4.28472	0.9	-0.36	142.9	C1'-exo	4	0.14	not measured	39.0694	C
ETS	seq_38	C	-5.5	T-T	4.24857	0.9	-0.04	137.8	C1'-exo	5	-0.3	not measured	34.8866	T
ETS	seq_38	B	-3.5	C-C	3.83614	1.3	0.65	116.6	C1'-exo	7	-0.69	not measured	34.9182	C
ETS	seq_38	C	-1.5	C-T	4.61464	0	0.83	146.5	C2'-endo	9	-0.46	not measured	25.4378	T
ETS	seq_38	C	-0.5	C-C	3.782	1.9	-1.29	87.7	O4'-endo	5	-0.51	not measured	34.8502	C
ETS	seq_38	C	0.5	T-C	3.88705	1.3	-0.25	114.1	C1'-exo	10	-0.51	not measured	25.6765	C
ETS	seq_38	C	1.5	T-T	3.89056	1.5	-0.27	118.5	C1'-exo	7	-0.33	not measured	33.838	T
ETS	seq_38	C	2.5	C-T	4.82821	0	0.38	146.6	C2'-endo	7	-0.53	not measured	40.0744	T
ETS	seq_38	C	3.5	T-C	3.64068	3	-1.08	108.1	C1'-exo	3	-0.39	not measured	29.1179	C
ETS	seq_38	B	7.5	C-C	4.33816	0.6	-0.04	132.4	C1'-exo	5	-0.11	not measured	35.3393	C
ETS	seq_38	C	9.5	C-T	4.71581	0.3	0.36	153.4	C2'-endo	13	-0.42	not measured	30.8077	T
ETS	seq_39	C	-8.5	C-T	4.18818	1.1	-0.08	141.7	C1'-exo	7	-0.22	not measured	36.2725	T
ETS	seq_39	C	-7.5	C-C	4.24714	0.7	-0.12	140.3	C1'-exo	3	-0.07	not measured	38.9379	C
ETS	seq_39	C	-6.5	C-C	4.32462	0.5	-0.04	145.4	C2'-endo	3	-0.15	not measured	37.7392	C
ETS	seq_39	C	-5.5	C-C	4.28389	0.5	0.13	136.9	C1'-exo	4	-0.25	not measured	33.2108	C
ETS	seq_39	C	-4.5	C-C	4.13369	1	-0.44	127.9	C1'-exo	4	-0.17	not measured	37.2565	C
ETS	seq_39	C	-3.5	T-C	4.25245	0.4	0.17	136.3	C1'-exo	4	-0.51	not measured	31.0468	C
ETS	seq_39	C	-0.5	C-C	3.84438	2.3	-1.31	102.8	O4'-endo	7	-0.34	not measured	34.9989	C
ETS	seq_39	C	0.5	T-C	3.91993	1.2	-0.14	119.5	C1'-exo	10	-0.46	not measured	24.1632	C
ETS	seq_39	C	1.5	T-T	3.86069	1.5	-0.33	117.2	C1'-exo	7	-0.31	not measured	34.1606	T
ETS	seq_39	C	2.5	C-T	4.85336	0	0.47	144.8	C2'-endo	4	-0.61	not measured	40.8016	T
ETS	seq_39	C	3.5	T-C	3.66453	2.8	-0.96	133	C1'-exo	3	-0.36	not measured	28.8737	C
ETS	seq_39	C	4.5	C-T	4.20398	1.2	-0.06	146.4	C2'-endo	9	0.11	not measured	35.7533	T
ETS	seq_39	C	5.5	C-C	4.34718	0.5	0	147.2	C2'-endo	4	0.03	not measured	38.4876	C
ETS	seq_39	C	6.5	T-C	4.13597	1.1	-0.4	139.2	C1'-exo	4	-0.01	not measured	38.0934	C
ETS	seq_39	C	7.5	T-T	4.23086	1	-0.1	139.1	C1'-exo	5	-0.15	not measured	37.7136	T
ETS	seq_39	C	8.5	C-T	4.42905	0.4	0.2	141.8	C1'-exo	4	-0.4	not measured	36.7107	T
ETS	seq_39	C	9.5	C-C	4.42386	0.5	0.03	139.3	C1'-exo	2	-0.3	not measured	36.494	C
ETS	seq_4	B	-7.5	C-C	4.34809	0.6	0.15	144.7	C2'-endo	3	-0.09	not measured	39.271	C
ETS	seq_4	B	-6.5	C-C	4.27515	0.8	0.13	146.8	C2'-endo	6	0.02	not measured	37.7158	C
ETS	seq_4	C	-4.5	C-T	4.41913	0.3	0.23	146.6	C2'-endo	4	-0.59	not measured	34.2701	T
ETS	seq_4	B	-2.5	T-C	4.17411	0.2	-0.15	116.4	C1'-exo	4	-0.74	not measured	29.5253	T
ETS	seq_4	C	-0.5	C-C	3.86891	2.3	-1.28	135.1	C1'-exo	10	-0.34	not measured	31.9094	C
ETS	seq_4	C	0.5	T-C	3.91579	1.1	-0.1	120.8	C1'-exo	10	-0.49	not measured	23.8821	C
ETS	seq_4	C	1.5	T-T	3.83952	1.6	-0.35	114.5	C1'-exo	7	-0.36	not measured	33.4968	T
ETS	seq_4	C	2.5	C-T	4.89321	0	0.61	144.6	C2'-endo	6	-0.63	not measured	38.4416	T
ETS	seq_4	C	3.5	C-C	3.61712	2.7	-1.06	141.4	C1'-exo	1	-0.47	not measured	31.2138	C
ETS	seq_4	C	4.5	T-C	4.07481	1.8	-0.55	142.4	C1'-exo	10	0.17	not measured	34.5107	C
ETS	seq_4	B	8.5	T-C	4.2941	0.6	0.06	137.6	C1'-exo	4	-0.06	not measured	37.0577	T
ETS	seq_4	B	9.5	C-C	4.31831	1.1	0.5	139.8	C1'-exo	8	0.39	not measured	39.6634	C
ETS	seq_40	C	-7.5	C-T	4.39205	0.5	0.29	140.6	C1'-exo	4	-0.32	not measured	35.8301	T
ETS	seq_40	C	-6.5	C-C	4.26526	0.4	0.14	137.2	C1'-exo	3	-0.29	not measured	33.6131	C
ETS	seq_40	C	-5.5	T-C	4.09864	1.3	-0.56	130.8	C1'-exo	4	0.01	not measured	37.513	C
ETS	seq_40	C	-4.5	T-T	4.25976	0.8	-0.04	132.7	C1'-exo	5	-0.28	not measured	35.5757	T
ETS	seq_40	C	-1.5	C-T	4.57447	0.1	0.68	146.3	C2'-endo	9	-0.38	not measured	27.3132	T
ETS	seq_40	C	-0.5	C-C	3.7912	1.9	-1.29	90.9	O4'-endo	5	-0.47	not measured	36.053	C
ETS	seq_40	C	0.5	T-C	3.88386	1.3	-0.23	113.8	C1'-exo	9	-0.52	not measured	24.1327	C
ETS	seq_40	C	1.5	T-T	3.83875	1.6	-0.34	116.1	C1'-exo	7	-0.24	not measured	33.8849	T
ETS	seq_40	C	2.5	C-T	4.84428	0	0.39	145.9	C2'-endo	5	-0.56	not measured	41.3795	T
ETS	seq_40	C	3.5	T-C	3.59826	3.1	-1.05	135.2	C1'-exo	2	-0.27	not measured	29.5954	C
ETS	seq_40	C	4.5	C-T	4.20818	1.2	-0.08	146.5	C2'-endo	11	0.09	not measured	35.481	T
ETS	seq_40	B	6.5	C-C	4.26303	0.8	0.12	128.7	C1'-exo	5	-0.08	not measured	36.8233	C
ETS	seq_40	B	7.5	C-C	4.24063	0.8	0.07	140.3	C1'-exo	5	-0.07	not measured	35.3046	C
ETS	seq_40	C	9.5	C-C	4.48079	0.3	0.13	147.1	C2'-endo	2	-0.29	not measured	35.9967	C
ETS	seq_41	B	-8.5	C-T	4.62938	0.2	-0.22	22.2	C3'-endo	13	-0.71	not measured	29.5898	C
ETS	seq_41	B	-7.5	T-T	4.39594	0.6	-0.07	150.3	C2'-endo	6	-0.35	not measured	35.6277	T
ETS	seq_41	B	-6.5	T-C	4.17917	1.1	0.39	141	C1'-exo	4	0	not measured	39.065	T
ETS	seq_41	B	-5.5	C-C	4.26347	0.7	0.01	143.8	C1'-exo	5	-0.07	not measured	34.43	C
ETS	seq_41	B	-2.5	C-C	4.25464	0	-0.46	106.8	O4'-endo	7	-0.83	not measured	27.3289	C
ETS	seq_41	C	-0.5	C-C	3.83947	2.2	-1.25	136.3	C1'-exo	9	-0.35	not measured	31.7779	C
ETS	seq_41	C	0.5	T-C	3.89771	1.1	-0.11	120.6	C1'-exo	10	-0.47	not measured	24.41	C
ETS	seq_41	C	1.5	T-T	3.90836	1.2	-0.14	116.8	C1'-exo	6	-0.4	not measured	32.9262	T
ETS	seq_41	C	2.5	C-T	4.7938	0	0.18	147	C2'-endo	5	-0.65	not measured	42.7709	T
ETS	seq_41	B	4.5	T-C	4.23612	1	-0.04	150.2	C2'-endo	6	0.19	not measured	33.7646	T
ETS	seq_41	C	6.5	C-T	4.39152	0.7	0.12	146.4	C2'-endo	6	-0.25	not measured	35.9724	T
ETS	seq_41	B	8.5	C-C	4.22843	0.8	0.14	145.7	C2'-endo	4	0.04	not measured	38.6226	C
ETS	seq_41	B	9.5	C-C	4.20156	1	0.24	134	C1'-exo	6	-0.05	not measured	37.2109	C
ETS	seq_42	B	-8.5	C-T	4.56296	0.3	-0.1	25.5	C3'-endo	13	-0.75	not measured	30.2411	C
ETS	seq_42	B	-7.5	T-T	4.42594	0.5	-0.1	151.2	C2'-endo	6	-0.4	not measured	35.6064	T
ETS	seq_42	B	-6.5	T-C	4.18836	0.9	0.28	140.3	C1'-exo	4	-0.07	not measured	37.7067	T
ETS	seq_42	B	-5.5	C-C	4.15985	1	0.21	143.5	C1'-exo	7	-0.06	not measured	33.8512	C
ETS	seq_42	C	-3.5	C-C	4.43434	0	0.53	139.6	C1'-exo	5	-0.76	not measured	29.6412	C
ETS	seq_42	C	-0.5	C-C	3.8613	2.2	-1.22	136.3	C1'-exo	10	-0.35	not measured	31.628	C
ETS	seq_42	C	0.5	T-C	3.9343	1.1	-0.04	123.9	C1'-exo	9	-0.45	not measured	24.0995	C
ETS	seq_42	C	1.5	T-T	3.85657	1.4	-0.22	115.5	C1'-exo	6	-0.32	not measured	33.7657	T
ETS	seq_42	C	2.5	C-T	4.7915	0	0.12	145	C2'-endo	4	-0.66	not measured	44.4824	T
ETS	seq_42	C	9.5	T-C	4.18894	1.6	-0.51	147.6	C2'-endo	5	0.14	not measured	37.4439	C
ETS	seq_43	C	-8.5	T-C	4.29668	1	-0.34	145.3	C2'-endo	6	0.19	not measured	39.1474	C
ETS	seq_43	C	-7.5	C-T	4.48754	0.4	0.31	143.3	C1'-exo	4	-0.39	not measured	35.9782	T
ETS	seq_43	B	-5.5	C-T	4.34049	0.7	-0.12	134.6	C1'-exo	5	-0.35	not measured	35.4116	C
ETS	seq_43	B	-2.5	C-C	4.21695	0.1	-0.35	113.3	C1'-exo	8	-0.86	not measured	27.6121	C
ETS	seq_43	C	-0.5	C-C	3.82017	2.3	-1.29	133.5	C1'-exo	9	-0.36	not measured	32.0514	C
ETS	seq_43	C	0.5	T-C	3.90365	1.1	-0.09	118.9	C1'-exo	10	-0.47	not measured	23.8418	C
ETS	seq_43	C	1.5	T-T	3.89596	1.4	-0.18	115.8	C1'-exo	6	-0.34	not measured	33.2765	T
ETS	seq_43	C	2.5	C-T	4.80668	0	0.22	145.6	C2'-endo	4	-0.71	not measured	42.1285	T
ETS	seq_43	B	8.5	T-C	4.2564	0.7	0.11	131.5	C1'-exo	4	-0.14	not measured	35.8375	T
ETS	seq_43	B	9.5	C-C	4.20589	1.3	0.51	146.2	C2'-endo	7	0.18	not measured	37.8691	C
ETS	seq_44	B	-8.5	C-C	4.43294	0.3	-0.18	157.9	C2'-endo	3	-0.33	not measured	34.7193	C
ETS	seq_44	C	-6.5	C-C	4.16431	0.9	-0.05	143.4	C1'-exo	5	-0.12	not measured	32.9419	C
ETS	seq_44	C	-5.5	T-C	4.08626	1.1	-0.43	136	C1'-exo	3	-0.09	not measured	37.9383	C
ETS	seq_44	C	-4.5	T-T	4.14924	1	-0.11	133.5	C1'-exo	4	-0.37	not measured	36.3952	T
ETS	seq_44	C	-3.5	C-T	4.62771	0	0.71	148	C2'-endo	5	-0.72	not measured	30.8616	T
ETS	seq_44	C	-0.5	C-C	3.85403	2.2	-1.19	133.1	C1'-exo	9	-0.33	not measured	32.563	C
ETS	seq_44	C	0.5	T-C	3.896	1.1	-0.1	123.3	C1'-exo	9	-0.47	not measured	24.7148	C
ETS	seq_44	C	1.5	T-T	3.85881	1.4	-0.19	115.8	C1'-exo	6	-0.32	not measured	33.0865	T
ETS	seq_44	C	2.5	C-T	4.73785	0	0.15	144.8	C2'-endo	5	-0.68	not measured	43.926	T
ETS	seq_44	B	6.5	C-C	4.21318	1.4	0.33	124.3	C1'-exo	8	0.06	not measured	35.1845	C
ETS	seq_44	C	8.5	C-T	4.39902	0.5	0.24	146.6	C2'-endo	4	-0.4	not measured	36.3572	T
ETS	seq_45	B	-7.5	T-T	4.17907	1.3	0.26	129.9	C1'-exo	6	-0.12	not measured	40.2069	T
ETS	seq_45	B	-6.5	T-C	4.19817	1	0.33	139.7	C1'-exo	4	0.06	not measured	39.9483	T
ETS	seq_45	B	-5.5	C-C	4.18805	1	0.17	148.3	C2'-endo	6	0.06	not measured	36.0804	C
ETS	seq_45	B	-2.5	C-C	4.23431	0	-0.45	110	C1'-exo	8	-0.9	not measured	26.5649	C
ETS	seq_45	C	-0.5	C-C	3.83511	2.2	-1.22	135.6	C1'-exo	9	-0.33	not measured	32.6622	C
ETS	seq_45	C	0.5	T-C	3.8993	1.2	-0.11	120.6	C1'-exo	10	-0.44	not measured	24.2259	C
ETS	seq_45	C	1.5	T-T	3.90408	1.3	-0.17	116.8	C1'-exo	6	-0.31	not measured	33.323	T
ETS	seq_45	C	2.5	C-T	4.79015	0	0.14	146.5	C2'-endo	4	-0.66	not measured	43.5118	T
ETS	seq_45	C	5.5	C-C	4.36634	0.6	-0.04	144.9	C2'-endo	4	0.06	not measured	39.1611	C
ETS	seq_45	B	7.5	C-C	4.41712	0.4	-0.08	140.8	C1'-exo	4	0.08	not measured	38.1765	C
ETS	seq_45	B	8.5	C-C	4.2882	0.6	-0.03	143.1	C1'-exo	3	-0.1	not measured	38.0503	C
ETS	seq_45	B	9.5	C-C	4.17501	1.2	0.39	142.5	C1'-exo	6	-0.02	not measured	39.091	C
ETS	seq_46	B	-8.5	C-T	4.62859	0.2	-0.28	25	C3'-endo	13	-0.79	not measured	28.3886	C
ETS	seq_46	B	-7.5	T-T	4.40699	0.6	-0.09	149.3	C2'-endo	6	-0.38	not measured	36.8681	T
ETS	seq_46	B	-6.5	T-C	4.14829	1.1	0.41	140.4	C1'-exo	4	-0.04	not measured	38.2045	T
ETS	seq_46	B	-5.5	C-C	4.2321	0.9	0.18	146.3	C2'-endo	5	0.08	not measured	35.9148	C
ETS	seq_46	B	-2.5	C-C	4.21041	0	-0.39	106.8	O4'-endo	8	-0.96	not measured	26.7577	C
ETS	seq_46	C	-0.5	C-C	3.83028	2	-1.19	126.4	C1'-exo	8	-0.43	not measured	32.7139	C
ETS	seq_46	C	0.5	T-C	3.90206	1.1	-0.1	119.3	C1'-exo	9	-0.48	not measured	24.9205	C
ETS	seq_46	C	1.5	T-T	3.84786	1.6	-0.31	113.6	C1'-exo	7	-0.35	not measured	33.2425	T
ETS	seq_46	C	2.5	C-T	4.82596	0	0.34	145.7	C2'-endo	5	-0.63	not measured	41.877	T
ETS	seq_46	C	5.5	C-C	4.35426	0.5	0.04	153.5	C2'-endo	4	-0.07	not measured	39.9548	C
ETS	seq_46	C	6.5	C-C	4.41012	0.2	0.4	145.6	C2'-endo	2	-0.12	not measured	36.9592	C
ETS	seq_46	C	7.5	C-C	4.19064	1.1	-0.45	139.5	C1'-exo	5	-0.06	not measured	38.0037	C
ETS	seq_47	B	-8.5	C-C	4.42364	0.5	0.03	158	C2'-endo	4	-0.33	not measured	35.9198	C
ETS	seq_47	C	-6.5	C-C	4.22026	0.8	-0.06	143.2	C1'-exo	5	-0.03	not measured	34.2642	C
ETS	seq_47	C	-5.5	T-C	4.22673	0.9	-0.26	140.8	C1'-exo	3	0.02	not measured	37.6792	C
ETS	seq_47	C	-4.5	T-T	4.24384	0.9	-0.12	135.3	C1'-exo	5	-0.28	not measured	35.99	T
ETS	seq_47	B	-2.5	C-C	4.12003	0.1	-0.18	106.2	O4'-endo	10	-0.98	not measured	27.4575	C
ETS	seq_47	C	-0.5	C-C	3.85735	2.3	-1.28	134	C1'-exo	10	-0.29	not measured	32.5901	C
ETS	seq_47	C	0.5	T-C	3.90776	1.2	-0.14	119.9	C1'-exo	9	-0.43	not measured	24.4745	C
ETS	seq_47	C	1.5	T-T	3.91719	1.4	-0.17	116.3	C1'-exo	6	-0.31	not measured	33.4206	T
ETS	seq_47	C	2.5	C-T	4.80996	0	0.14	146.7	C2'-endo	4	-0.69	not measured	44.0631	T
ETS	seq_47	C	5.5	C-C	4.35873	0.6	0	147.7	C2'-endo	5	-0.19	not measured	36.559	C
ETS	seq_47	B	7.5	T-T	4.30659	0.9	0.06	138.4	C1'-exo	5	-0.23	not measured	37.4715	T
ETS	seq_48	B	-8.5	C-T	4.55767	0.4	-0.12	19.8	C3'-endo	13	-0.71	not measured	30.4203	C
ETS	seq_48	B	-7.5	T-T	4.36128	0.7	-0.04	150.8	C2'-endo	6	-0.43	not measured	35.4909	T
ETS	seq_48	B	-6.5	T-C	4.14475	1	0.39	137.3	C1'-exo	4	-0.08	not measured	38.888	T
ETS	seq_48	B	-5.5	C-C	4.08401	0.9	0.15	143	C1'-exo	5	-0.23	not measured	33.3106	C
ETS	seq_48	C	-3.5	C-C	4.37303	0	0.6	134.3	C1'-exo	7	-0.78	not measured	27.6354	C
ETS	seq_48	C	-0.5	C-C	3.84288	2	-1.19	127.4	C1'-exo	9	-0.42	not measured	31.5664	C
ETS	seq_48	C	0.5	T-C	3.91615	1	-0.03	121.6	C1'-exo	9	-0.51	not measured	24.6199	C
ETS	seq_48	C	1.5	T-T	3.83389	1.6	-0.35	112.8	C1'-exo	7	-0.34	not measured	33.6094	T
ETS	seq_48	C	2.5	C-T	4.83369	0	0.35	145.5	C2'-endo	5	-0.64	not measured	42.0489	T
ETS	seq_48	C	5.5	C-C	4.30737	0.4	0.16	147.7	C2'-endo	5	-0.25	not measured	37.1136	C
ETS	seq_48	B	7.5	C-C	4.28192	0.6	0.07	140.9	C1'-exo	4	0.05	not measured	38.6064	C
ETS	seq_48	B	8.5	C-T	4.35216	0.6	-0.23	137.4	C1'-exo	5	-0.3	not measured	36.2226	C
ETS	seq_48	B	9.5	T-C	4.26659	1.4	0.76	141	C1'-exo	7	0.39	not measured	41.2021	T
ETS	seq_49	B	-8.5	C-C	4.54131	0.1	-0.27	154.9	C2'-endo	2	-0.48	not measured	35.1563	C
ETS	seq_49	C	-6.5	C-C	4.07576	1.4	-0.51	144.3	C2'-endo	7	0.08	not measured	35.2956	C
ETS	seq_49	C	-5.5	T-C	4.09623	1	-0.3	140.4	C1'-exo	4	-0.15	not measured	37.4545	C
ETS	seq_49	C	-4.5	T-T	4.19878	0.9	-0.04	136.3	C1'-exo	4	-0.34	not measured	36.5603	T
ETS	seq_49	C	-3.5	C-T	4.68862	0	0.77	149.1	C2'-endo	6	-0.74	not measured	30.4506	T
ETS	seq_49	C	-0.5	C-C	3.86305	2.1	-1.23	116.4	C1'-exo	8	-0.34	not measured	34.0946	C
ETS	seq_49	C	0.5	T-C	3.94318	1.1	-0.06	123.2	C1'-exo	9	-0.48	not measured	24.4491	C
ETS	seq_49	C	1.5	T-T	3.84869	1.6	-0.35	113.2	C1'-exo	6	-0.32	not measured	34.3576	T
ETS	seq_49	C	2.5	C-T	4.81107	0	0.35	144.3	C2'-endo	5	-0.64	not measured	41.5016	T
ETS	seq_49	B	8.5	C-T	4.43974	0.4	-0.28	122.1	C1'-exo	4	-0.33	not measured	35.7655	C
ETS	seq_49	B	9.5	T-T	4.24541	1.2	0.26	140.1	C1'-exo	5	0	not measured	42.0416	T
ETS	seq_5	C	-6.5	C-C	4.21926	0.9	-0.09	145.7	C2'-endo	5	-0.03	not measured	35.2095	C
ETS	seq_5	C	-5.5	T-C	4.13625	1.1	-0.37	140.5	C1'-exo	3	-0.1	not measured	38.0035	C
ETS	seq_5	C	-4.5	T-T	4.19215	1	-0.05	136.8	C1'-exo	4	-0.37	not measured	36.3239	T
ETS	seq_5	C	-3.5	C-T	4.62654	0	0.68	147.2	C2'-endo	5	-0.74	not measured	31.4717	T
ETS	seq_5	C	-0.5	C-C	3.8661	2.2	-1.22	123.6	C1'-exo	9	-0.33	not measured	33.0144	C
ETS	seq_5	C	0.5	T-C	3.93845	1.1	-0.09	125	C1'-exo	9	-0.43	not measured	25.3293	C
ETS	seq_5	C	1.5	T-T	3.85377	1.6	-0.38	114.7	C1'-exo	7	-0.31	not measured	34.8328	T
ETS	seq_5	C	2.5	C-T	4.85898	0	0.54	145.7	C2'-endo	5	-0.58	not measured	39.0312	T
ETS	seq_5	C	3.5	C-C	3.67452	2.8	-0.96	135.3	C1'-exo	1	-0.48	not measured	31.0672	C
ETS	seq_5	C	6.5	C-C	4.42576	0.4	0.18	144.9	C2'-endo	4	0.18	not measured	37.1352	C
ETS	seq_5	C	7.5	C-C	4.2827	0.8	-0.22	149	C2'-endo	5	-0.04	not measured	37.1972	C
ETS	seq_50	B	-8.5	C-T	4.55704	0.3	-0.16	27.4	C3'-endo	14	-0.67	not measured	29.5633	C
ETS	seq_50	B	-7.5	T-T	4.40325	0.6	-0.06	149.4	C2'-endo	6	-0.36	not measured	36.8434	T
ETS	seq_50	B	-6.5	T-C	4.14104	1	0.35	141.2	C1'-exo	4	-0.09	not measured	38.5521	T
ETS	seq_50	B	-5.5	C-C	4.12349	1.2	0.38	143.5	C1'-exo	6	0	not measured	35.3594	C
ETS	seq_50	C	-3.5	C-C	4.40859	0	0.56	140.1	C1'-exo	6	-0.79	not measured	29.2052	C
ETS	seq_50	C	-0.5	C-C	3.89737	1.7	-1.18	97.7	O4'-endo	5	-0.44	not measured	34.908	C
ETS	seq_50	C	0.5	T-C	3.9589	1	-0.04	119.8	C1'-exo	8	-0.46	not measured	24.7255	C
ETS	seq_50	C	1.5	T-T	3.9227	1.3	-0.16	114.8	C1'-exo	6	-0.35	not measured	33.0169	T
ETS	seq_50	C	2.5	C-T	4.78828	0	0.16	148.9	C2'-endo	6	-0.66	not measured	42.7822	T
ETS	seq_50	B	4.5	T-T	4.33802	0.8	-0.25	145.3	C2'-endo	7	0.05	not measured	33.8137	T
ETS	seq_50	B	7.5	C-C	4.31647	0.6	0	113.1	C1'-exo	6	-0.18	not measured	33.7596	C
ETS	seq_51	B	-8.5	C-C	4.59027	0.1	-0.3	156.8	C2'-endo	3	-0.47	not measured	35.6817	C
ETS	seq_51	C	-6.5	C-C	4.14006	1.1	-0.21	147.5	C2'-endo	6	0	not measured	34.0796	C
ETS	seq_51	C	-5.5	T-C	4.19168	1	-0.41	143.7	C1'-exo	3	0.06	not measured	39.033	C
ETS	seq_51	C	-4.5	T-T	4.25732	0.8	-0.09	139.3	C1'-exo	5	-0.26	not measured	37.1091	T
ETS	seq_51	B	-2.5	C-C	4.06646	0.1	-0.11	107.5	O4'-endo	10	-0.99	not measured	27.2766	C
ETS	seq_51	C	-0.5	C-C	3.85101	2.4	-1.27	138.2	C1'-exo	10	-0.27	not measured	32.7101	C
ETS	seq_51	C	0.5	T-C	3.90216	1.2	-0.15	122.9	C1'-exo	10	-0.44	not measured	24.5382	C
ETS	seq_51	C	1.5	T-T	3.8391	1.6	-0.32	115.3	C1'-exo	7	-0.34	not measured	34.2021	T
ETS	seq_51	C	2.5	C-T	4.79533	0	0.34	145.9	C2'-endo	5	-0.59	not measured	41.1644	T
ETS	seq_51	C	5.5	T-C	4.4015	0.4	0.04	155.8	C2'-endo	2	-0.16	not measured	39.1748	C
ETS	seq_51	B	7.5	T-C	4.39057	0.5	-0.04	189.1	C3'-exo	3	-0.04	not measured	39.0219	T
ETS	seq_52	B	-8.5	C-C	4.51472	0.2	-0.17	159.3	C2'-endo	3	-0.39	not measured	35.9413	C
ETS	seq_52	C	-6.5	C-C	4.15157	1.1	-0.19	141.6	C1'-exo	7	-0.04	not measured	33.0815	C
ETS	seq_52	C	-5.5	T-C	4.0792	1.2	-0.42	132.7	C1'-exo	4	-0.09	not measured	37.1535	C
ETS	seq_52	C	-4.5	T-T	4.19188	1	-0.09	135	C1'-exo	4	-0.33	not measured	36.8432	T
ETS	seq_52	C	-3.5	C-T	4.6721	0	0.71	149.1	C2'-endo	6	-0.74	not measured	30.5125	T
ETS	seq_52	C	-0.5	C-C	3.84297	2.2	-1.28	100.8	O4'-endo	6	-0.37	not measured	34.572	C
ETS	seq_52	C	0.5	T-C	3.93428	1.2	-0.11	119.9	C1'-exo	9	-0.38	not measured	24.948	C
ETS	seq_52	C	1.5	T-T	3.88965	1.4	-0.2	113.8	C1'-exo	6	-0.29	not measured	33.4792	T
ETS	seq_52	C	2.5	C-T	4.81575	0	0.19	146.5	C2'-endo	4	-0.69	not measured	43.5424	T
ETS	seq_52	C	5.5	C-T	4.43299	0.7	0.01	148.7	C2'-endo	5	0.09	not measured	39.3871	T
ETS	seq_52	C	6.5	T-C	4.23865	0.7	-0.18	139.4	C1'-exo	3	-0.24	not measured	36.7317	C
ETS	seq_52	B	8.5	T-T	4.32804	0.8	-0.03	130.5	C1'-exo	5	-0.26	not measured	37.8931	T
ETS	seq_52	B	9.5	T-C	4.34144	1.3	0.72	144.7	C2'-endo	8	0.69	not measured	42.7977	T
ETS	seq_53	B	-8.5	C-T	4.55628	0.3	-0.15	22.9	C3'-endo	13	-0.67	not measured	30.1127	C
ETS	seq_53	B	-7.5	T-T	4.37695	0.6	-0.07	149.8	C2'-endo	6	-0.38	not measured	36.0143	T
ETS	seq_53	B	-6.5	T-C	4.14613	1	0.35	137.9	C1'-exo	4	-0.09	not measured	38.5494	T
ETS	seq_53	B	-5.5	C-C	4.06247	1.3	0.42	142.3	C1'-exo	6	-0.11	not measured	34.2971	C
ETS	seq_53	C	-3.5	C-C	4.43504	0	0.58	138.6	C1'-exo	6	-0.78	not measured	29.0063	C
ETS	seq_53	C	-0.5	C-C	3.86053	2	-1.22	107	O4'-endo	6	-0.38	not measured	34.2826	C
ETS	seq_53	C	0.5	T-C	4.00812	0.9	0.07	125.1	C1'-exo	9	-0.37	not measured	25.1167	C
ETS	seq_53	C	1.5	T-T	3.86142	1.6	-0.44	111	C1'-exo	7	-0.29	not measured	35.315	T
ETS	seq_53	B	3.5	C-T	4.43617	0.1	-0.66	125.9	C1'-exo	7	-0.85	not measured	27.2037	C
ETS	seq_53	C	7.5	C-C	4.17363	0.9	-0.06	142.1	C1'-exo	6	-0.16	not measured	33.7679	C
ETS	seq_53	C	8.5	C-C	4.23559	0.6	-0.12	143.1	C1'-exo	3	-0.37	not measured	37.3134	C
ETS	seq_54	B	-8.5	C-T	4.63549	0.2	-0.24	21.3	C3'-endo	13	-0.73	not measured	30.3992	C
ETS	seq_54	B	-7.5	T-T	4.43328	0.5	-0.13	151.8	C2'-endo	6	-0.37	not measured	35.6745	T
ETS	seq_54	B	-6.5	T-C	4.20162	0.9	0.31	140.3	C1'-exo	4	-0.03	not measured	38.4108	T
ETS	seq_54	B	-5.5	C-C	4.14761	1.3	0.4	143.2	C1'-exo	7	0.09	not measured	34.7128	C
ETS	seq_54	C	-3.5	C-C	4.4676	0	0.63	136.3	C1'-exo	5	-0.79	not measured	29.0629	C
ETS	seq_54	C	-0.5	C-C	3.89293	2.1	-1.25	112.5	C1'-exo	8	-0.36	not measured	33.5479	C
ETS	seq_54	C	0.5	T-C	3.97318	1	-0.05	122.6	C1'-exo	9	-0.45	not measured	24.7831	C
ETS	seq_54	C	1.5	T-T	3.92867	1.4	-0.26	112.9	C1'-exo	6	-0.36	not measured	33.0378	T
ETS	seq_54	C	2.5	C-T	4.83784	0	0.36	148.3	C2'-endo	7	-0.61	not measured	40.385	T
ETS	seq_54	B	4.5	C-T	4.51971	0.3	-0.5	145.1	C2'-endo	6	-0.23	not measured	34.3395	C
ETS	seq_54	C	6.5	C-C	4.1735	1.5	-0.37	148.2	C2'-endo	9	0.28	not measured	34.9597	C
ETS	seq_54	C	7.5	C-C	4.27314	0.5	-0.03	146.1	C2'-endo	4	-0.11	not measured	36.8862	C
ETS	seq_54	C	8.5	T-C	4.20379	0.8	-0.26	140.7	C1'-exo	3	-0.17	not measured	38.2384	C
ETS	seq_55	B	-8.5	C-T	4.60308	0.3	-0.15	25.2	C3'-endo	13	-0.76	not measured	30.9717	C
ETS	seq_55	B	-7.5	T-T	4.40851	0.6	-0.06	150.3	C2'-endo	6	-0.41	not measured	36.1847	T
ETS	seq_55	B	-6.5	T-C	4.19739	1	0.38	139.5	C1'-exo	4	-0.05	not measured	39.1817	T
ETS	seq_55	B	-5.5	C-C	4.20998	0.9	0.17	143.7	C1'-exo	5	-0.06	not measured	34.7417	C
ETS	seq_55	B	-2.5	C-C	4.24747	0	-0.43	107.8	O4'-endo	8	-0.95	not measured	26.6958	C
ETS	seq_55	C	-0.5	C-C	3.82934	2.3	-1.31	135.5	C1'-exo	10	-0.34	not measured	31.6429	C
ETS	seq_55	C	0.5	T-C	3.92282	1	-0.07	122	C1'-exo	9	-0.54	not measured	23.9602	C
ETS	seq_55	C	1.5	T-T	3.89769	1.5	-0.34	114.6	C1'-exo	6	-0.36	not measured	34.0586	T
ETS	seq_55	C	2.5	C-T	4.84371	0	0.36	146.8	C2'-endo	6	-0.64	not measured	40.9026	T
ETS	seq_55	B	4.5	C-T	4.57951	0.2	-0.52	137.6	C1'-exo	6	-0.16	not measured	34.6991	C
ETS	seq_55	B	5.5	T-C	4.12199	1.4	0.45	144	C2'-endo	5	0.09	not measured	36.961	T
ETS	seq_55	C	7.5	C-C	4.1994	0.7	-0.03	141.3	C1'-exo	7	-0.38	not measured	32.0172	C
ETS	seq_55	B	9.5	T-T	4.23292	1.1	0.18	135.7	C1'-exo	7	-0.22	not measured	36.8689	T
ETS	seq_56	B	-8.5	C-C	4.51113	0.3	-0.07	155.6	C2'-endo	3	-0.28	not measured	37.1286	C
ETS	seq_56	C	-6.5	C-C	4.19861	0.8	-0.1	145.6	C2'-endo	5	-0.11	not measured	34.1859	C
ETS	seq_56	C	-5.5	T-C	4.1128	1.1	-0.4	139.6	C1'-exo	3	-0.09	not measured	37.6702	C
ETS	seq_56	C	-4.5	T-T	4.17779	1	-0.09	136.5	C1'-exo	4	-0.36	not measured	36.2329	T
ETS	seq_56	C	-3.5	C-T	4.62606	0	0.68	149	C2'-endo	4	-0.74	not measured	31.6596	T
ETS	seq_56	C	-0.5	C-C	3.84034	2.3	-1.24	136.8	C1'-exo	10	-0.33	not measured	32.336	C
ETS	seq_56	C	0.5	T-C	3.91273	1.1	-0.11	124.7	C1'-exo	9	-0.47	not measured	25.2118	C
ETS	seq_56	C	1.5	T-T	3.8897	1.4	-0.21	117.4	C1'-exo	6	-0.34	not measured	33.2536	T
ETS	seq_56	C	2.5	C-T	4.79475	0	0.21	147.9	C2'-endo	5	-0.63	not measured	42.8087	T
ETS	seq_56	B	4.5	T-C	4.2286	0.7	-0.12	148.1	C2'-endo	5	-0.03	not measured	32.7849	T
ETS	seq_56	B	5.5	C-C	4.02767	1.5	0.36	137.1	C1'-exo	9	0.05	not measured	33.1732	C
ETS	seq_56	C	7.5	C-T	4.35332	0.6	0.14	145.5	C2'-endo	5	-0.09	not measured	36.7028	T
ETS	seq_56	C	8.5	C-C	4.2799	0.6	-0.17	146.5	C2'-endo	3	0.06	not measured	41.1868	C
ETS	seq_56	C	9.5	T-C	4.33792	0.9	-0.34	148.4	C2'-endo	3	0.07	not measured	41.5497	C
ETS	seq_57	B	-8.5	C-C	4.46634	0.4	-0.07	153.6	C2'-endo	4	-0.28	not measured	35.3866	C
ETS	seq_57	C	-6.5	C-C	4.23964	0.8	-0.01	145.5	C2'-endo	5	-0.06	not measured	34.415	C
ETS	seq_57	C	-5.5	T-C	4.19888	1	-0.35	139.8	C1'-exo	3	0.05	not measured	38.0638	C
ETS	seq_57	C	-4.5	T-T	4.29298	0.7	-0.04	138	C1'-exo	5	-0.29	not measured	36.2765	T
ETS	seq_57	B	-2.5	C-C	4.09497	0.1	-0.16	105	O4'-endo	10	-0.98	not measured	26.8048	C
ETS	seq_57	C	-0.5	C-C	3.86283	2.3	-1.25	136	C1'-exo	10	-0.27	not measured	32.9023	C
ETS	seq_57	C	0.5	T-C	3.93672	1.1	-0.09	124	C1'-exo	9	-0.43	not measured	24.9667	C
ETS	seq_57	C	1.5	T-T	3.91829	1.3	-0.19	117.5	C1'-exo	6	-0.36	not measured	33.911	T
ETS	seq_57	C	2.5	C-T	4.81009	0	0.26	145.6	C2'-endo	5	-0.65	not measured	42.4983	T
ETS	seq_57	B	4.5	T-C	4.29449	0.6	-0.13	150.5	C2'-endo	4	0.07	not measured	34.2675	T
ETS	seq_57	B	5.5	C-C	4.06966	1.3	0.24	140.9	C1'-exo	7	0.03	not measured	33.6909	C
ETS	seq_57	B	8.5	C-T	4.37753	0.7	-0.14	138	C1'-exo	4	-0.29	not measured	37.9349	C
ETS	seq_58	B	-8.5	C-T	4.59313	0.4	-0.07	23.1	C3'-endo	13	-0.58	not measured	32.1279	C
ETS	seq_58	B	-7.5	T-T	4.36614	0.7	0.01	152.4	C2'-endo	6	-0.31	not measured	36.2379	T
ETS	seq_58	B	-6.5	T-C	4.19947	1	0.36	140.3	C1'-exo	4	0.03	not measured	38.6158	T
ETS	seq_58	B	-5.5	C-C	4.30094	0.5	-0.09	145.7	C2'-endo	5	-0.08	not measured	34.5465	C
ETS	seq_58	B	-2.5	C-C	4.21503	0	-0.4	108.3	C1'-exo	7	-0.94	not measured	27.5982	C
ETS	seq_58	C	-0.5	C-C	3.84991	2.2	-1.27	136.6	C1'-exo	10	-0.35	not measured	31.9629	C
ETS	seq_58	C	0.5	T-C	3.93077	1.1	-0.04	123.1	C1'-exo	10	-0.45	not measured	23.3502	C
ETS	seq_58	C	1.5	T-T	3.83053	1.6	-0.29	115.1	C1'-exo	7	-0.29	not measured	33.1189	T
ETS	seq_58	C	2.5	T-T	4.6789	0.2	-0.12	140.8	C1'-exo	7	-0.45	not measured	43.0114	T
ETS	seq_58	B	6.5	C-T	4.53457	0.5	-0.38	119.9	C1'-exo	6	-0.2	not measured	34.5741	C
ETS	seq_58	B	7.5	T-C	4.42841	0.8	0.34	145.3	C2'-endo	4	0.32	not measured	39.9827	T
ETS	seq_58	B	8.5	C-C	4.3132	0.8	0.06	144.3	C2'-endo	5	0.16	not measured	38.4012	C
ETS	seq_59	B	-8.5	C-C	4.50307	0.3	-0.02	156.4	C2'-endo	4	-0.18	not measured	37.217	C
ETS	seq_59	C	-6.5	C-C	4.29272	0.8	-0.13	144.7	C2'-endo	4	0.02	not measured	36.5868	C
ETS	seq_59	C	-5.5	T-C	4.16274	1	-0.36	139.4	C1'-exo	3	-0.09	not measured	37.8444	C
ETS	seq_59	C	-4.5	T-T	4.20177	1	-0.09	134.7	C1'-exo	4	-0.32	not measured	36.8882	T
ETS	seq_59	C	-3.5	C-T	4.6422	0	0.68	147.1	C2'-endo	5	-0.72	not measured	31.3814	T
ETS	seq_59	C	-0.5	C-C	3.8658	2	-1.22	99.8	O4'-endo	7	-0.36	not measured	34.7159	C
ETS	seq_59	C	0.5	T-C	3.94709	1	-0.03	121.7	C1'-exo	9	-0.46	not measured	24.3123	C
ETS	seq_59	C	1.5	T-T	3.89219	1.5	-0.28	114.9	C1'-exo	6	-0.36	not measured	34.354	T
ETS	seq_59	C	2.5	C-T	4.82075	0	0.34	145.7	C2'-endo	5	-0.62	not measured	41.5373	T
ETS	seq_59	B	4.5	C-C	4.49607	0.1	-0.51	144.8	C2'-endo	6	0.09	not measured	32.8314	C
ETS	seq_59	B	5.5	C-C	4.12243	1.2	0.38	148.8	C2'-endo	6	-0.01	not measured	37.7084	C
ETS	seq_59	B	6.5	C-C	4.27867	1	0.11	187.5	C3'-exo	5	0.04	not measured	35.3294	C
ETS	seq_59	B	9.5	C-C	4.26701	1	0.34	140.5	C1'-exo	7	0.16	not measured	39.8155	C
ETS	seq_6	C	-8.5	T-C	4.34141	1	-0.42	146.7	C2'-endo	8	0.45	not measured	41.0499	C
ETS	seq_6	C	-7.5	C-T	4.38655	0.5	0.29	144.9	C2'-endo	4	-0.18	not measured	36.2222	T
ETS	seq_6	C	-6.5	T-C	4.29257	0.7	-0.3	138.7	C1'-exo	3	0.12	not measured	39.7687	C
ETS	seq_6	C	-5.5	T-T	4.29296	0.8	-0.01	142.8	C1'-exo	6	-0.28	not measured	35.7854	T
ETS	seq_6	B	-3.5	C-C	3.84431	1	0.49	127	C1'-exo	7	-0.82	not measured	33.6963	C
ETS	seq_6	B	-2.5	C-C	4.16538	0	-0.31	112.5	C1'-exo	7	-0.92	not measured	26.6712	C
ETS	seq_6	C	-0.5	C-C	3.82559	2.3	-1.32	133.4	C1'-exo	9	-0.3	not measured	33.7787	C
ETS	seq_6	C	0.5	T-C	3.90628	1.1	-0.07	120.4	C1'-exo	10	-0.47	not measured	23.942	C
ETS	seq_6	C	1.5	T-T	3.82885	1.6	-0.35	113.8	C1'-exo	7	-0.31	not measured	34.2779	T
ETS	seq_6	C	2.5	C-T	4.86212	0	0.59	144.3	C2'-endo	5	-0.61	not measured	38.8056	T
ETS	seq_6	C	3.5	C-C	3.55186	3.2	-1.24	138.5	C1'-exo	1	-0.43	not measured	31.5383	C
ETS	seq_6	C	4.5	C-C	4.15318	1.3	-0.16	146.2	C2'-endo	11	0.3	not measured	35.077	C
ETS	seq_6	C	5.5	C-C	4.23878	0.7	-0.17	147.9	C2'-endo	5	0.02	not measured	39.2688	C
ETS	seq_6	C	6.5	T-C	4.14155	1.1	-0.31	139.8	C1'-exo	5	-0.02	not measured	37.4661	C
ETS	seq_6	C	7.5	C-T	4.37414	0.4	0.39	140.7	C1'-exo	5	-0.32	not measured	34.2598	T
ETS	seq_6	C	8.5	C-C	4.23331	0.7	-0.33	135.5	C1'-exo	3	-0.2	not measured	39.7696	C
ETS	seq_60	B	-8.5	C-C	4.55457	0.4	0.04	29.7	C3'-endo	11	-0.48	not measured	31.0163	C
ETS	seq_60	C	-6.5	C-C	4.23256	0.9	-0.08	145.2	C2'-endo	6	0.01	not measured	34.0129	C
ETS	seq_60	C	-5.5	T-C	4.19826	1.1	-0.45	137.2	C1'-exo	4	0.09	not measured	38.7292	C
ETS	seq_60	C	-4.5	T-T	4.27829	0.8	-0.04	134.2	C1'-exo	5	-0.3	not measured	36.6436	T
ETS	seq_60	B	-2.5	C-C	4.07504	0.1	-0.16	103.8	O4'-endo	10	-1.02	not measured	26.4388	C
ETS	seq_60	C	-0.5	C-C	3.84555	2.3	-1.25	135	C1'-exo	10	-0.28	not measured	32.7182	C
ETS	seq_60	C	0.5	T-C	3.9209	1	-0.09	121.8	C1'-exo	9	-0.51	not measured	24.6651	C
ETS	seq_60	C	1.5	T-T	3.87724	1.5	-0.33	115.9	C1'-exo	6	-0.36	not measured	35.0644	T
ETS	seq_60	C	2.5	C-T	4.79287	0	0.32	147.2	C2'-endo	6	-0.6	not measured	41.1093	T
ETS	seq_60	B	4.5	C-C	4.36445	0.3	-0.29	144.6	C2'-endo	5	-0.06	not measured	33.2857	C
ETS	seq_60	B	5.5	C-T	4.27502	0.8	-0.11	133.7	C1'-exo	5	-0.21	not measured	36.6804	C
ETS	seq_60	B	6.5	T-C	4.1733	1.4	0.54	133.7	C1'-exo	7	0.18	not measured	36.4218	T
ETS	seq_60	C	8.5	T-C	4.20553	1.1	-0.47	138.3	C1'-exo	5	-0.06	not measured	37.6742	C
ETS	seq_60	C	9.5	C-T	4.65454	0.2	0.43	155.9	C2'-endo	12	-0.57	not measured	30.5774	T
ETS	seq_7	B	-8.5	T-T	4.4326	0.7	0.01	153.2	C2'-endo	6	-0.04	not measured	38.9865	T
ETS	seq_7	B	-7.5	T-T	4.32687	0.8	0.06	143.3	C1'-exo	4	-0.13	not measured	38.8631	T
ETS	seq_7	B	-6.5	T-C	4.20293	1	0.32	143.9	C1'-exo	4	0.11	not measured	39.4842	T
ETS	seq_7	B	-5.5	C-C	4.20663	0.9	0.14	148.6	C2'-endo	6	0.07	not measured	34.9956	C
ETS	seq_7	B	-2.5	C-C	4.22384	0	-0.37	110.3	C1'-exo	8	-0.94	not measured	26.7873	C
ETS	seq_7	C	-0.5	C-C	3.83216	2	-1.25	128	C1'-exo	8	-0.43	not measured	33.0685	C
ETS	seq_7	C	0.5	T-C	3.90729	1.1	-0.11	121.2	C1'-exo	10	-0.52	not measured	24.3213	C
ETS	seq_7	C	1.5	T-T	3.86788	1.5	-0.35	116.9	C1'-exo	7	-0.36	not measured	34.0317	T
ETS	seq_7	C	2.5	C-T	4.83128	0	0.43	145.8	C2'-endo	6	-0.61	not measured	39.8088	T
ETS	seq_7	C	3.5	C-C	3.60244	2.8	-0.97	122.7	C1'-exo	0	-0.57	not measured	30.4399	C
ETS	seq_7	B	7.5	C-C	4.64871	0.1	-0.4	146.9	C2'-endo	2	0.17	not measured	40.7403	C
ETS	seq_7	B	8.5	C-C	4.31953	1.1	0.35	149.4	C2'-endo	6	0.38	not measured	42.0805	C
ETS	seq_8	C	-7.5	C-C	4.246	0.9	-0.16	141.1	C1'-exo	5	0.1	not measured	37.7214	C
ETS	seq_8	C	-6.5	C-C	4.35857	0.5	0.02	144.5	C2'-endo	3	-0.04	not measured	37.9089	C
ETS	seq_8	B	-2.5	C-C	4.19361	0	-0.38	108.5	C1'-exo	8	-0.9	not measured	27.4124	C
ETS	seq_8	C	-0.5	C-C	3.81727	2.2	-1.26	134.6	C1'-exo	9	-0.38	not measured	32.5257	C
ETS	seq_8	C	0.5	T-C	3.9016	1.1	-0.1	121.4	C1'-exo	10	-0.5	not measured	23.8373	C
ETS	seq_8	C	1.5	T-T	3.81561	1.7	-0.34	115.1	C1'-exo	7	-0.33	not measured	33.9212	T
ETS	seq_8	C	2.5	C-T	4.85358	0	0.57	145.4	C2'-endo	6	-0.61	not measured	39.0205	T
ETS	seq_8	C	3.5	C-C	3.53761	3.3	-1.23	135	C1'-exo	1	-0.35	not measured	30.7893	C
ETS	seq_8	C	4.5	C-C	4.12031	1.4	-0.16	146.8	C2'-endo	11	0.3	not measured	34.4858	C
ETS	seq_8	C	5.5	C-C	4.34792	0.6	-0.14	153	C2'-endo	3	0.13	not measured	41.7242	C
ETS	seq_8	C	6.5	C-C	4.32548	0.5	0.09	140.4	C1'-exo	3	-0.12	not measured	36.5894	C
ETS	seq_9	C	-6.5	C-C	4.29088	0.6	0.04	143.3	C1'-exo	5	-0.02	not measured	34.7294	C
ETS	seq_9	C	-5.5	T-C	4.18124	0.9	-0.26	140	C1'-exo	3	-0.03	not measured	37.8412	C
ETS	seq_9	C	-4.5	T-T	4.21673	0.9	-0.11	137	C1'-exo	4	-0.3	not measured	37.3668	T
ETS	seq_9	C	-3.5	T-T	4.37464	0.4	0.32	138.8	C1'-exo	4	-0.56	not measured	34.3067	T
ETS	seq_9	C	-0.5	C-C	3.80678	2.6	-1.38	105.3	O4'-endo	8	-0.22	not measured	35.7745	C
ETS	seq_9	C	0.5	T-C	3.92371	1.2	-0.1	123	C1'-exo	10	-0.43	not measured	24.622	C
ETS	seq_9	C	1.5	T-T	3.83054	1.6	-0.35	115.8	C1'-exo	7	-0.3	not measured	34.4101	T
ETS	seq_9	C	2.5	C-T	4.82804	0	0.55	144	C2'-endo	5	-0.62	not measured	39.6338	T
ETS	seq_9	C	3.5	C-C	3.57054	3.1	-1.14	138.2	C1'-exo	0	-0.47	not measured	30.6734	C
ETS	seq_9	C	4.5	C-C	4.14056	1.5	-0.23	145.7	C2'-endo	12	0.35	not measured	34.4141	C
ETS	seq_9	C	5.5	C-C	4.3538	0.4	0.06	153	C2'-endo	5	-0.17	not measured	38.1109	C
ETS	seq_9	C	8.5	C-C	4.26855	1.1	-0.28	148.3	C2'-endo	6	0.22	not measured	37.8727	C
ETS	seq_9	C	9.5	C-C	4.59027	0.2	0.13	151.1	C2'-endo	3	-0.07	not measured	38.4204	C
LEF1	seq_1	C	-8.5	C-C	4.22392	0.4	-0.05	141.9	C1'-exo	7	-0.4	not measured	33.5194	C
LEF1	seq_1	C	-7.5	T-C	4.16233	0.7	-0.16	139.4	C1'-exo	6	-0.26	not measured	35.4898	C
LEF1	seq_1	C	-6.5	T-T	4.23631	0.9	-0.14	136.4	C1'-exo	5	-0.29	not measured	37.1637	T
LEF1	seq_1	C	-5.5	T-T	4.29377	0.8	-0.16	136.4	C1'-exo	5	-0.3	not measured	39.064	T
LEF1	seq_1	C	-4.5	T-T	4.38106	0.6	-0.01	137.8	C1'-exo	6	-0.42	not measured	38.5147	T
LEF1	seq_1	C	-3.5	T-T	4.41455	0.4	0.08	137.8	C1'-exo	6	-0.57	not measured	37.8775	T
LEF1	seq_1	C	-2.5	C-T	4.57895	0.1	0.28	142.8	C1'-exo	2	-0.83	not measured	37.6923	T
LEF1	seq_1	C	-1.5	T-C	4.32018	0.2	0.03	141.5	C1'-exo	2	-0.62	not measured	35.8126	C
LEF1	seq_1	B	0.5	T-C	4.43209	0.2	-0.04	125.5	C1'-exo	4	-0.37	not measured	35.2553	T
LEF1	seq_1	C	2.5	T-T	4.42996	0.7	0.1	163.1	C2'-endo	34	1.01	3.28127	29.9488	T
LEF1	seq_1	C	3.5	T-T	4.50823	0.6	0.31	36.6	C4'-exo	19	0.54	3.5434	18.4187	T
LEF1	seq_1	C	4.5	C-T	4.09128	2.5	-1.31	44.2	C4'-exo	22	1.03	not measured	34.5494	T
LEF1	seq_1	C	5.5	C-C	4.24881	0.8	-0.37	144.1	C2'-endo	5	0.02	not measured	39.8325	C
LEF1	seq_1	B	7.5	T-T	4.33429	0.5	-0.05	140.9	C1'-exo	5	-0.41	not measured	38.8164	T
LEF1	seq_1	B	8.5	T-T	4.28436	0.7	0.07	137.4	C1'-exo	6	-0.19	not measured	37.6097	T
LEF1	seq_1	B	9.5	T-T	4.08186	1.1	0.29	136.7	C1'-exo	7	-0.26	not measured	35.6112	T
LEF1	seq_10	C	-7.5	T-T	4.25789	0.9	-0.25	135.5	C1'-exo	7	-0.48	not measured	38.5631	T
LEF1	seq_10	C	-4.5	T-T	4.25528	0.9	-0.11	133.2	C1'-exo	6	-0.29	not measured	37.3226	T
LEF1	seq_10	C	-3.5	T-T	4.39427	0.5	0.1	136.1	C1'-exo	7	-0.5	not measured	37.6496	T
LEF1	seq_10	C	-2.5	C-T	4.64692	0.1	0.36	143.4	C1'-exo	4	-0.87	not measured	38.3371	T
LEF1	seq_10	B	-0.5	T-T	4.28764	0.4	-0.08	142	C1'-exo	7	-0.51	not measured	33.0802	T
LEF1	seq_10	B	0.5	T-C	4.50623	0.2	-0.1	123.5	C1'-exo	5	-0.18	not measured	37.4255	T
LEF1	seq_10	C	2.5	T-T	4.35799	0.9	0.04	158.9	C2'-endo	35	0.84	3.24993	29.9346	T
LEF1	seq_10	C	3.5	T-T	4.42451	0.5	0.34	38.4	C4'-exo	15	0.46	3.58648	17.5229	T
LEF1	seq_10	C	4.5	C-T	3.99155	2.5	-1.47	58.8	C4'-exo	25	0.92	not measured	37.7724	T
LEF1	seq_10	C	5.5	C-C	4.17865	0.4	0.04	138.1	C1'-exo	11	-0.1	not measured	32.2729	C
LEF1	seq_10	C	6.5	T-C	4.10551	0.5	-0.19	137.3	C1'-exo	3	-0.67	not measured	36.9184	C
LEF1	seq_10	B	8.5	C-C	4.24	0.7	0.34	125.8	C1'-exo	5	-0.29	not measured	37.3151	C
LEF1	seq_11	C	-8.5	T-C	4.21186	0.9	-0.18	136.6	C1'-exo	7	-0.24	not measured	34.0344	C
LEF1	seq_11	C	-7.5	C-T	4.40543	0.5	0.22	133.1	C1'-exo	5	-0.46	not measured	35.0016	T
LEF1	seq_11	C	-6.5	T-C	4.24096	0.7	-0.22	133.3	C1'-exo	4	-0.17	not measured	36.5501	C
LEF1	seq_11	C	-5.5	T-T	4.30683	1	-0.15	135.1	C1'-exo	6	-0.24	not measured	38.1902	T
LEF1	seq_11	C	-4.5	T-T	4.35401	0.8	-0.05	134.5	C1'-exo	6	-0.27	not measured	38.3347	T
LEF1	seq_11	C	-3.5	T-T	4.33591	0.8	-0.05	133.6	C1'-exo	6	-0.32	not measured	38.0572	T
LEF1	seq_11	C	-2.5	C-T	4.4712	0.5	0.14	141.3	C1'-exo	2	-0.49	not measured	39.4148	T
LEF1	seq_11	C	-1.5	T-C	4.35897	0.4	-0.01	143.2	C1'-exo	3	-0.25	not measured	39.1188	C
LEF1	seq_11	C	-0.5	C-T	4.37269	0.6	-0.04	141	C1'-exo	6	-0.48	not measured	36.6469	T
LEF1	seq_11	C	2.5	T-T	4.25419	1.4	-0.22	157.9	C2'-endo	44	0.68	3.34895	29.142	T
LEF1	seq_11	C	3.5	T-T	4.37056	0.9	0.33	35.5	C3'-endo	19	0.62	3.42264	19.0228	T
LEF1	seq_11	C	4.5	C-T	3.91946	2.5	-0.94	46.4	C4'-exo	26	1	not measured	29.822	T
LEF1	seq_11	C	5.5	C-C	4.18946	1	-0.6	145.7	C2'-endo	6	0.24	not measured	39.9541	C
LEF1	seq_11	C	6.5	C-C	4.32699	0	0.4	146	C2'-endo	5	-0.68	not measured	34.0771	C
LEF1	seq_11	C	7.5	T-C	4.10322	0.9	-0.3	136.5	C1'-exo	3	-0.36	not measured	36.9989	C
LEF1	seq_11	C	8.5	T-T	4.18089	1.1	-0.21	133.4	C1'-exo	5	-0.27	not measured	37.1486	T
LEF1	seq_11	C	9.5	T-T	4.40797	0.8	0.03	135.7	C1'-exo	5	-0.16	not measured	37.2555	T
LEF1	seq_12	C	-8.5	T-T	4.1616	1.2	-0.18	132.6	C1'-exo	9	-0.26	not measured	35.0896	T
LEF1	seq_12	C	-7.5	T-T	4.31442	0.9	-0.12	125.7	C1'-exo	6	-0.36	not measured	36.5529	T
LEF1	seq_12	B	-5.5	C-C	4.28461	0.7	0.13	119.9	C1'-exo	2	-0.59	not measured	36.1866	C
LEF1	seq_12	B	-4.5	C-C	4.52049	0.1	-0.3	132.1	C1'-exo	1	-0.45	not measured	38.4456	C
LEF1	seq_12	C	1.5	T-C	4.40308	0.3	-0.07	153.6	C2'-endo	3	-0.29	not measured	39.7392	C
LEF1	seq_12	C	2.5	T-T	4.04722	1.3	-0.12	116.3	C1'-exo	7	-0.36	3.73681	31.776	T
LEF1	seq_12	C	3.5	T-T	4.27242	1.1	-0.22	129.4	C1'-exo	7	-0.06	3.71561	38.7576	T
LEF1	seq_12	C	4.5	C-T	4.29778	0.6	0.05	125.5	C1'-exo	4	-0.64	not measured	35.1366	T
LEF1	seq_12	C	5.5	T-C	4.15111	0.8	-0.14	129.4	C1'-exo	5	-0.36	not measured	35.2972	C
LEF1	seq_12	C	6.5	C-T	4.30714	0.6	0.16	129.9	C1'-exo	6	-0.5	not measured	34.4641	T
LEF1	seq_12	C	7.5	T-C	4.0786	0.9	-0.23	124.5	C1'-exo	5	-0.44	not measured	35.726	C
LEF1	seq_12	C	8.5	T-T	4.19632	1	-0.12	127.9	C1'-exo	6	-0.45	not measured	35.133	T
LEF1	seq_12	C	9.5	C-T	4.4144	0.6	0.13	127.4	C1'-exo	7	-0.59	not measured	35.577	T
LEF1	seq_13	C	-7.5	C-T	4.37864	0.5	0.11	138.8	C1'-exo	5	-0.41	not measured	36.7336	T
LEF1	seq_13	C	-6.5	T-C	4.24026	0.6	-0.17	140.9	C1'-exo	3	-0.25	not measured	37.2839	C
LEF1	seq_13	C	-5.5	T-T	4.28051	0.9	-0.12	137	C1'-exo	5	-0.36	not measured	37.4811	T
LEF1	seq_13	C	-4.5	T-T	4.28736	0.8	-0.1	133.4	C1'-exo	5	-0.39	not measured	37.406	T
LEF1	seq_13	C	-3.5	T-T	4.36666	0.7	-0.04	135.8	C1'-exo	6	-0.45	not measured	38.0312	T
LEF1	seq_13	C	-2.5	C-T	4.54513	0.2	0.24	141.8	C1'-exo	3	-0.66	not measured	38.3285	T
LEF1	seq_13	C	-1.5	T-C	4.32668	0.4	-0.12	141	C1'-exo	2	-0.5	not measured	37.8963	C
LEF1	seq_13	B	0.5	T-C	4.49631	0.2	-0.03	127.2	C1'-exo	4	-0.23	not measured	36.8548	T
LEF1	seq_13	C	2.5	T-T	4.49486	0.9	0.03	160.3	C2'-endo	33	0.88	3.45305	28.7688	T
LEF1	seq_13	C	3.5	T-T	4.61392	0.4	0.48	38.5	C4'-exo	12	0.21	3.94905	18.5017	T
LEF1	seq_14	C	-4.5	T-T	4.2109	0.9	-0.12	129.4	C1'-exo	6	-0.42	not measured	35.3176	T
LEF1	seq_14	C	-3.5	T-T	4.29749	0.6	0.01	133	C1'-exo	5	-0.55	not measured	36.1222	T
LEF1	seq_14	C	-2.5	C-T	4.44166	0.2	0.15	137.1	C1'-exo	2	-0.78	not measured	37.5579	T
LEF1	seq_14	C	-1.5	T-C	4.27801	0.3	0.04	140.6	C1'-exo	3	-0.62	not measured	35.5969	C
LEF1	seq_14	B	0.5	C-C	4.55306	0	-0.08	131.1	C1'-exo	1	-0.66	not measured	38.0123	C
LEF1	seq_14	C	2.5	T-T	4.30079	1.2	-0.09	158.6	C2'-endo	39	0.66	3.30303	29.3667	T
LEF1	seq_14	C	3.5	T-T	4.44353	0.7	0.33	38.5	C4'-exo	14	0.48	3.65269	17.2974	T
LEF1	seq_14	C	4.5	C-T	4.02931	2.2	-1.18	58	C4'-exo	24	0.85	not measured	37.0781	T
LEF1	seq_14	C	5.5	C-C	4.08438	0.8	-0.47	141.2	C1'-exo	10	0	not measured	37.5124	C
LEF1	seq_14	C	6.5	C-C	4.25851	0.1	0.19	151.1	C2'-endo	8	-0.75	not measured	37.0903	C
LEF1	seq_14	C	7.5	T-C	4.19882	0.6	-0.07	144.1	C2'-endo	5	-0.37	not measured	36.7064	C
LEF1	seq_14	C	8.5	C-T	4.24894	0.6	0.08	136.3	C1'-exo	5	-0.63	not measured	34.7835	T
LEF1	seq_14	C	9.5	C-C	4.3774	0.3	0.03	139.3	C1'-exo	1	-0.6	not measured	37.5127	C
LEF1	seq_15	B	-8.5	T-C	4.47496	0.5	0.01	150.1	C2'-endo	3	-0.06	not measured	38.1673	T
LEF1	seq_15	B	-7.5	C-T	4.41997	0.7	-0.05	144.9	C2'-endo	5	-0.13	not measured	38.3709	C
LEF1	seq_15	C	-5.5	C-C	4.37543	0.9	-0.22	147.6	C2'-endo	7	0.16	not measured	37.0351	C
LEF1	seq_15	C	-4.5	C-C	4.25914	0.8	-0.15	135	C1'-exo	3	-0.13	not measured	37.1615	C
LEF1	seq_15	C	-3.5	T-C	4.31771	0.7	-0.13	143.9	C1'-exo	2	-0.15	not measured	38.3137	C
LEF1	seq_15	C	-2.5	C-T	4.6249	0.3	0.4	151.9	C2'-endo	9	-0.52	not measured	32.7148	T
LEF1	seq_15	B	-0.5	T-T	4.3785	0.4	-0.2	145.4	C2'-endo	6	-0.34	not measured	33.909	T
LEF1	seq_15	B	0.5	T-C	4.40471	0.8	0.12	124.1	C1'-exo	8	0.22	not measured	36.3862	T
LEF1	seq_15	C	2.5	T-T	4.32598	1.2	-0.08	155.7	C2'-endo	42	0.87	3.38459	28.0946	T
LEF1	seq_15	C	3.5	T-T	4.40054	0.8	0.31	36.2	C4'-exo	19	0.72	3.3978	20.7288	T
LEF1	seq_15	C	4.5	C-T	3.96016	2.4	-0.9	45.9	C4'-exo	25	1.04	not measured	30.7318	T
LEF1	seq_15	C	5.5	C-C	4.27013	0.7	-0.36	148	C2'-endo	5	0.3	not measured	38.5807	C
LEF1	seq_15	C	6.5	T-C	4.22991	0.4	-0.11	150.7	C2'-endo	2	-0.34	not measured	39.8048	C
LEF1	seq_15	C	7.5	T-T	4.26508	0.8	0.02	138.4	C1'-exo	4	-0.32	not measured	37.7214	T
LEF1	seq_15	C	8.5	T-T	4.31458	0.9	-0.13	140.5	C1'-exo	5	-0.32	not measured	39.0759	T
LEF1	seq_15	C	9.5	T-T	4.47193	0.8	0.09	143.8	C1'-exo	6	-0.16	not measured	37.1551	T
LEF1	seq_16	B	-7.5	C-C	4.4154	0.4	0.03	140.9	C1'-exo	4	-0.32	not measured	37.2031	C
LEF1	seq_16	B	-4.5	C-C	4.40962	0.3	0.01	137.1	C1'-exo	3	-0.33	not measured	38.4333	C
LEF1	seq_16	C	-2.5	C-C	4.38032	0.2	0.08	142.5	C1'-exo	4	-0.52	not measured	37.2174	C
LEF1	seq_16	C	-1.5	T-C	4.2893	0.6	-0.11	138.1	C1'-exo	4	-0.42	not measured	35.7793	C
LEF1	seq_16	B	0.5	T-C	4.53747	0.5	0.11	118.2	C1'-exo	5	-0.15	not measured	37.6082	T
LEF1	seq_16	C	2.5	T-T	4.31476	1	-0.08	159.5	C2'-endo	37	0.82	3.23207	30.3518	T
LEF1	seq_16	C	3.5	T-T	4.52011	0.5	0.32	36.7	C4'-exo	15	0.45	3.68197	17.6765	T
LEF1	seq_16	C	4.5	C-T	4.03122	2.4	-1.25	57.8	C4'-exo	23	0.72	not measured	35.4502	T
LEF1	seq_16	C	5.5	C-C	3.99601	0.9	-0.47	124.4	C1'-exo	11	-0.16	not measured	34.9041	C
LEF1	seq_16	B	9.5	C-C	4.26162	0.8	0.17	142.3	C1'-exo	11	0.08	not measured	35.2415	C
LEF1	seq_17	B	-7.5	T-T	4.27059	0.8	0.14	134.6	C1'-exo	6	-0.41	not measured	36.3551	T
LEF1	seq_17	B	-6.5	T-T	4.19528	1.3	0.37	126.2	C1'-exo	7	-0.17	not measured	36.6347	T
LEF1	seq_17	C	-4.5	T-C	4.21519	1	-0.39	126.3	C1'-exo	6	-0.09	not measured	34.6041	C
LEF1	seq_17	C	-3.5	T-T	4.27843	0.7	0	123.5	C1'-exo	5	-0.52	not measured	34.5673	T
LEF1	seq_17	B	-1.5	C-T	4.40709	0.3	0.05	137.4	C1'-exo	1	-0.75	not measured	39.2744	C
LEF1	seq_17	B	-0.5	T-T	4.23934	0.6	-0.09	136	C1'-exo	7	-0.41	not measured	30.8113	T
LEF1	seq_17	B	0.5	T-C	4.62874	0.2	-0.08	111.7	C1'-exo	5	-0.08	not measured	39.1119	T
LEF1	seq_17	C	2.5	T-T	4.34216	1.1	-0.07	154.1	C2'-endo	35	0.76	3.32059	29.7856	T
LEF1	seq_17	C	3.5	T-T	4.40031	0.6	0.36	40	C4'-exo	16	0.46	3.55472	15.9327	T
LEF1	seq_17	C	4.5	C-T	3.84197	2.8	-1.29	61.4	C4'-exo	25	0.74	not measured	33.8386	T
LEF1	seq_17	C	5.5	C-C	4.10064	1	-0.43	135.8	C1'-exo	11	0.2	not measured	39.0049	C
LEF1	seq_17	C	6.5	C-C	4.34939	0.1	0.17	146.6	C2'-endo	5	-0.9	not measured	37.5134	C
LEF1	seq_17	B	8.5	C-T	4.35415	0.5	-0.03	133.6	C1'-exo	6	-0.62	not measured	34.686	C
LEF1	seq_18	B	-6.5	C-C	4.37161	0.3	-0.03	139.6	C1'-exo	3	-0.38	not measured	37.5807	C
LEF1	seq_18	C	-2.5	C-T	4.56034	0.3	0.31	143.3	C1'-exo	5	-0.57	not measured	36.2313	T
LEF1	seq_18	B	-0.5	T-T	4.29088	0.5	-0.04	136.8	C1'-exo	6	-0.48	not measured	33.425	T
LEF1	seq_18	B	0.5	T-C	4.48831	0.2	-0.04	125.7	C1'-exo	5	-0.09	not measured	38.4768	T
LEF1	seq_18	C	2.5	T-T	4.37495	0.8	0.01	161.3	C2'-endo	36	1.01	3.21767	30.8523	T
LEF1	seq_18	C	3.5	T-T	4.55126	0.4	0.53	36.3	C4'-exo	16	0.43	3.68744	17.0692	T
LEF1	seq_18	C	4.5	C-T	4.04412	2.3	-1.26	59.3	C4'-exo	23	0.82	not measured	39.6024	T
LEF1	seq_18	C	5.5	C-C	3.95953	1.2	-0.56	136.2	C1'-exo	9	-0.13	not measured	37.3407	C
LEF1	seq_18	C	8.5	C-T	4.23514	0.8	-0.01	137.3	C1'-exo	6	-0.39	not measured	36.5984	T
LEF1	seq_18	C	9.5	C-C	4.46819	0.2	0.17	146.2	C2'-endo	3	-0.37	not measured	38.3784	C
LEF1	seq_19	C	-8.5	C-C	4.11791	1.1	-0.28	76.7	O4'-endo	10	-0.33	not measured	32.0008	C
LEF1	seq_19	C	-7.5	C-C	4.11848	0.7	0	107	O4'-endo	8	-0.5	not measured	31.2389	C
LEF1	seq_19	B	-5.5	C-C	4.23242	0.6	0.09	121.4	C1'-exo	5	-0.45	not measured	33.2241	C
LEF1	seq_19	B	-4.5	C-C	4.26193	0.7	-0.02	115.8	C1'-exo	6	-0.33	not measured	32.8938	C
LEF1	seq_19	C	-0.5	T-T	4.23976	0.9	-0.12	127.2	C1'-exo	7	-0.43	not measured	35.2318	T
LEF1	seq_19	C	2.5	T-T	4.29953	1.3	-0.09	154.8	C2'-endo	40	0.67	3.41154	27.7466	T
LEF1	seq_19	C	3.5	T-T	4.372	1	0.06	36.6	C4'-exo	19	0.61	3.44271	20.7568	T
LEF1	seq_19	C	4.5	C-T	3.90398	2.7	-1.25	45.9	C4'-exo	27	0.97	not measured	32.1096	T
LEF1	seq_19	C	5.5	C-C	4.04178	1.6	-0.78	140.8	C1'-exo	9	0.34	not measured	41.1659	C
LEF1	seq_19	C	6.5	C-C	4.32492	0.1	0.32	142.3	C1'-exo	4	-0.63	not measured	35.9061	C
LEF1	seq_19	C	9.5	T-T	4.41969	0.9	0.03	131.2	C1'-exo	6	-0.05	not measured	36.7193	T
LEF1	seq_2	C	-8.5	T-T	4.14065	1.2	-0.28	138.2	C1'-exo	7	-0.39	not measured	36.1641	T
LEF1	seq_2	C	-7.5	T-T	4.24747	0.9	-0.14	134.1	C1'-exo	6	-0.34	not measured	36.9765	T
LEF1	seq_2	C	-6.5	C-T	4.39217	0.5	0.12	136.5	C1'-exo	5	-0.44	not measured	36.9939	T
LEF1	seq_2	C	-5.5	T-C	4.24045	0.7	-0.17	139.7	C1'-exo	3	-0.17	not measured	39.3398	C
LEF1	seq_2	C	-4.5	T-T	4.31855	0.8	-0.06	138	C1'-exo	6	-0.32	not measured	37.9758	T
LEF1	seq_2	C	-3.5	T-T	4.34323	0.7	-0.01	133.9	C1'-exo	7	-0.47	not measured	37.7545	T
LEF1	seq_2	B	0.5	T-C	4.50653	0.4	0.01	108.6	C1'-exo	5	-0.22	not measured	36.0753	T
LEF1	seq_2	C	2.5	T-T	4.30795	1.3	-0.28	158.9	C2'-endo	39	0.75	3.30992	31.5442	T
LEF1	seq_2	C	3.5	T-T	4.46245	0.8	0.31	35.6	C3'-endo	17	0.47	3.60436	17.7625	T
LEF1	seq_2	C	4.5	C-T	4.03508	2.8	-1.25	41	C4'-exo	26	0.86	not measured	33.5935	T
LEF1	seq_2	C	5.5	C-C	4.09527	0.7	-0.3	141.1	C1'-exo	7	-0.25	not measured	34.6845	C
LEF1	seq_2	C	6.5	T-C	4.16023	0.6	-0.2	144.2	C2'-endo	3	-0.38	not measured	38.2479	C
LEF1	seq_2	C	7.5	T-T	4.17005	0.9	-0.05	135	C1'-exo	5	-0.41	not measured	34.7452	T
LEF1	seq_2	C	8.5	T-T	4.25419	0.8	-0.04	134.8	C1'-exo	5	-0.44	not measured	36.3609	T
LEF1	seq_2	C	9.5	C-T	4.51822	0.3	0.25	139.2	C1'-exo	6	-0.62	not measured	36.0642	T
LEF1	seq_20	B	-8.5	T-C	4.34446	0.6	-0.02	131.7	C1'-exo	3	-0.28	not measured	32.5982	T
LEF1	seq_20	B	-5.5	C-C	4.29535	0.5	-0.02	122.4	C1'-exo	4	-0.43	not measured	35.1981	C
LEF1	seq_20	B	-4.5	C-C	4.27582	0.6	0.08	132.4	C1'-exo	4	-0.35	not measured	36.5108	C
LEF1	seq_20	B	-3.5	C-C	4.23895	0.6	0.15	134.6	C1'-exo	2	-0.53	not measured	36.3194	C
LEF1	seq_20	B	-2.5	C-C	4.43412	0.1	-0.24	133.7	C1'-exo	1	-0.56	not measured	35.8236	C
LEF1	seq_20	B	0.5	T-C	4.4758	0.5	0.01	107.3	O4'-endo	6	-0.22	not measured	35.5276	T
LEF1	seq_20	C	2.5	T-T	4.31307	1.3	-0.15	157.3	C2'-endo	39	0.69	3.38236	29.0891	T
LEF1	seq_20	C	3.5	T-T	4.45962	0.6	0.43	38.4	C4'-exo	16	0.61	3.53328	19.0686	T
LEF1	seq_20	C	4.5	C-T	4.01022	2.2	-0.88	62.9	C4'-exo	25	0.89	not measured	32.341	T
LEF1	seq_20	C	5.5	C-C	4.07066	1.1	-0.6	128.8	C1'-exo	10	0.14	not measured	36.2789	C
LEF1	seq_20	C	6.5	C-C	4.21072	0.2	0.06	143	C1'-exo	5	-0.7	not measured	37.2655	C
LEF1	seq_20	C	7.5	C-C	4.30271	0.3	0.14	143.6	C1'-exo	1	-0.56	not measured	38.1048	C
LEF1	seq_3	C	-8.5	C-C	4.17405	0.6	0.06	123.2	C1'-exo	9	-0.61	not measured	29.0249	C
LEF1	seq_3	C	-7.5	C-C	4.08862	0.7	-0.1	120.3	C1'-exo	8	-0.53	not measured	32.3187	C
LEF1	seq_3	C	-6.5	T-C	4.15221	0.9	-0.25	130.9	C1'-exo	5	-0.38	not measured	35.6087	C
LEF1	seq_3	B	-4.5	C-C	4.41159	0.3	-0.14	117.3	C1'-exo	5	-0.51	not measured	35.0413	C
LEF1	seq_3	B	0.5	T-C	4.6053	0.4	-0.02	101.7	O4'-endo	8	-0.11	not measured	36.6995	T
LEF1	seq_3	C	2.5	T-T	4.31157	1.1	-0.13	154.7	C2'-endo	37	0.77	3.29813	29.1078	T
LEF1	seq_3	C	3.5	T-T	4.39925	0.8	0.33	39.2	C4'-exo	17	0.43	3.56369	16.3884	T
LEF1	seq_3	C	4.5	C-T	3.98077	2.3	-1.21	56	C4'-exo	26	0.95	not measured	37.0507	T
LEF1	seq_3	C	5.5	C-C	3.9276	1.1	-0.38	111.2	C1'-exo	13	-0.09	not measured	33.5011	C
LEF1	seq_3	C	6.5	T-C	4.15424	0.7	-0.25	141.8	C1'-exo	4	-0.3	not measured	39.3293	C
LEF1	seq_3	C	7.5	C-T	4.28903	0.5	0.22	136.1	C1'-exo	4	-0.75	not measured	35.8034	T
LEF1	seq_4	B	-6.5	C-C	4.34582	0.4	0	132.5	C1'-exo	3	-0.49	not measured	36.9848	C
LEF1	seq_4	C	-4.5	C-T	4.34771	0.6	0.05	127.4	C1'-exo	6	-0.44	not measured	35.8099	T
LEF1	seq_4	C	-3.5	T-C	4.27751	0.5	-0.04	134.4	C1'-exo	2	-0.3	not measured	35.9192	C
LEF1	seq_4	C	-2.5	C-T	4.47707	0.3	0.23	137	C1'-exo	2	-0.64	not measured	36.897	T
LEF1	seq_4	C	-1.5	T-C	4.28599	0.4	-0.03	135.7	C1'-exo	2	-0.64	not measured	35.3313	C
LEF1	seq_4	B	0.5	T-C	4.50575	0.4	-0.07	108.4	C1'-exo	6	-0.23	not measured	35.2658	T
LEF1	seq_4	C	2.5	T-T	4.33684	1	-0.19	159	C2'-endo	39	0.99	3.21223	33.5635	T
LEF1	seq_4	C	3.5	T-T	4.50546	0.7	0.33	34.5	C3'-endo	19	0.53	3.55307	19.0745	T
LEF1	seq_4	C	4.5	C-T	4.02418	2.2	-0.86	43.2	C4'-exo	22	0.94	not measured	31.3634	T
LEF1	seq_4	C	5.5	T-C	3.95364	1.6	-0.83	141.9	C1'-exo	9	0.25	not measured	39.431	C
LEF1	seq_4	C	6.5	C-T	4.33481	0.2	0.24	141	C1'-exo	3	-0.8	not measured	36.1025	T
LEF1	seq_4	C	7.5	T-C	4.13698	0.7	-0.19	139.6	C1'-exo	2	-0.49	not measured	38.4206	C
LEF1	seq_5	C	-7.5	T-C	4.18631	1	-0.2	129.2	C1'-exo	7	-0.08	not measured	35.4952	C
LEF1	seq_5	C	-4.5	T-T	4.37784	1.2	-0.12	156.3	C2'-endo	38	0.76	not measured	30.5422	T
LEF1	seq_5	C	-3.5	T-T	4.59062	0.4	0.41	37.6	C4'-exo	14	0.64	not measured	18.4689	T
LEF1	seq_5	C	-2.5	C-T	4.36828	1.6	-0.72	58.1	C4'-exo	21	0.51	not measured	30.8243	T
LEF1	seq_5	C	-1.5	T-C	4.10327	0.6	-0.29	126.8	C1'-exo	8	-0.48	not measured	29.315	C
LEF1	seq_5	C	1.5	T-C	4.19416	0.9	-0.29	132.6	C1'-exo	4	-0.4	not measured	34.1369	C
LEF1	seq_5	C	2.5	T-T	4.13309	1.2	-0.21	123	C1'-exo	6	-0.42	3.78901	33.9869	T
LEF1	seq_5	C	3.5	T-T	4.22385	0.9	-0.09	129.6	C1'-exo	5	-0.42	3.84222	34.8927	T
LEF1	seq_5	C	4.5	C-T	4.40653	0.5	0.11	132	C1'-exo	4	-0.57	not measured	35.8741	T
LEF1	seq_5	C	5.5	C-C	4.329	0.3	0.01	133.9	C1'-exo	1	-0.57	not measured	35.3473	C
LEF1	seq_5	C	6.5	C-C	4.27525	0.6	-0.09	135.5	C1'-exo	3	-0.45	not measured	35.7206	C
LEF1	seq_5	C	7.5	T-C	4.21577	0.8	-0.22	135	C1'-exo	4	-0.29	not measured	35.5711	C
LEF1	seq_5	C	8.5	T-T	4.32551	0.9	-0.13	134.7	C1'-exo	5	-0.31	not measured	36.5378	T
LEF1	seq_5	C	9.5	T-T	4.4593	0.7	0.01	135.6	C1'-exo	5	-0.25	not measured	36.4246	T
LEF1	seq_6	C	-7.5	T-T	4.26033	1	-0.22	135.8	C1'-exo	6	-0.3	not measured	38.2875	T
LEF1	seq_6	C	-6.5	T-T	4.28236	0.8	-0.11	136.6	C1'-exo	5	-0.42	not measured	38.4042	T
LEF1	seq_6	C	-5.5	T-T	4.31819	0.7	-0.09	137.2	C1'-exo	6	-0.41	not measured	38.8297	T
LEF1	seq_6	C	-4.5	C-T	4.43188	0.4	0.12	137.6	C1'-exo	5	-0.53	not measured	38.8096	T
LEF1	seq_6	C	-3.5	T-C	4.35493	0.4	-0.02	145.7	C2'-endo	2	-0.41	not measured	39.5908	C
LEF1	seq_6	B	0.5	T-C	4.54044	0.4	0.01	116.7	C1'-exo	5	-0.19	not measured	37.9795	T
LEF1	seq_6	C	2.5	T-T	4.32488	1.1	-0.19	160.8	C2'-endo	42	0.89	3.29749	31.0263	T
LEF1	seq_6	C	3.5	T-T	4.43059	0.8	0.24	35.2	C3'-endo	18	0.64	3.48372	18.6783	T
LEF1	seq_6	C	4.5	C-T	3.98661	2.5	-1.2	42.5	C4'-exo	28	1.03	not measured	34.0606	T
LEF1	seq_6	C	5.5	C-C	4.09905	1	-0.41	144.6	C2'-endo	7	0.04	not measured	39.1947	C
LEF1	seq_6	C	6.5	T-C	4.19298	0.6	-0.16	149.5	C2'-endo	3	-0.34	not measured	38.9725	C
LEF1	seq_6	C	7.5	T-T	4.15887	1	-0.1	130.1	C1'-exo	6	-0.44	not measured	35.6956	T
LEF1	seq_7	B	-8.5	C-T	4.46192	0.3	-0.24	157.7	C2'-endo	7	-0.6	not measured	34.261	C
LEF1	seq_7	C	-6.5	T-T	4.2407	1.1	-0.29	130.7	C1'-exo	7	-0.31	not measured	38.2044	T
LEF1	seq_7	B	-4.5	C-C	4.37599	0.4	0.05	123.3	C1'-exo	4	-0.44	not measured	37.7446	C
LEF1	seq_7	B	-1.5	C-T	4.39388	0.4	0.22	127.4	C1'-exo	2	-0.7	not measured	39.7136	C
LEF1	seq_7	B	-0.5	T-T	4.16093	0.8	0.02	136.8	C1'-exo	7	-0.39	not measured	31.4689	T
LEF1	seq_7	B	0.5	T-C	4.58706	0.2	-0.01	113.2	C1'-exo	5	-0.14	not measured	38.5657	T
LEF1	seq_7	C	2.5	T-T	4.34281	1.1	-0.07	159.1	C2'-endo	35	0.76	3.28276	31.1309	T
LEF1	seq_7	C	3.5	T-T	4.54249	0.7	0.35	35.9	C3'-endo	17	0.32	3.75122	15.9678	T
LEF1	seq_7	C	4.5	C-T	3.99711	3	-1.37	42.5	C4'-exo	23	0.84	not measured	33.1073	T
LEF1	seq_7	C	5.5	C-C	4.0538	1.5	-0.76	138.1	C1'-exo	9	0.21	not measured	39.7196	C
LEF1	seq_7	B	7.5	C-C	4.27542	0.2	-0.1	131.3	C1'-exo	3	-0.64	not measured	37.1599	C
LEF1	seq_7	B	8.5	C-T	4.27956	0.6	-0.13	137.7	C1'-exo	6	-0.52	not measured	34.244	C
LEF1	seq_7	B	9.5	T-C	3.92877	1.2	0.35	128.8	C1'-exo	9	-0.39	not measured	32.0306	T
LEF1	seq_8	C	-8.5	C-T	4.40204	0.5	0.15	139.3	C1'-exo	6	-0.66	not measured	33.0041	T
LEF1	seq_8	B	-6.5	C-T	4.51425	0.3	-0.27	130.9	C1'-exo	5	-0.57	not measured	33.7356	C
LEF1	seq_8	B	-5.5	T-C	4.20396	0.9	0.32	134.9	C1'-exo	4	-0.29	not measured	37.3427	T
LEF1	seq_8	B	-4.5	C-C	4.43415	0.3	-0.12	135.6	C1'-exo	3	-0.3	not measured	36.7355	C
LEF1	seq_8	C	-2.5	C-T	4.51132	0.4	0.22	138.8	C1'-exo	3	-0.53	not measured	37.0874	T
LEF1	seq_8	C	-1.5	T-C	4.3014	0.5	-0.04	129.4	C1'-exo	4	-0.44	not measured	34.579	C
LEF1	seq_8	B	0.5	T-C	4.52525	0.5	0.03	114.9	C1'-exo	5	-0.13	not measured	36.807	T
LEF1	seq_8	C	2.5	T-T	4.39031	1	-0.14	156.7	C2'-endo	37	0.83	3.34684	31.7308	T
LEF1	seq_8	C	3.5	T-T	4.53762	0.7	0.25	37.8	C4'-exo	17	0.5	3.64931	18.7891	T
LEF1	seq_8	C	4.5	C-T	4.17754	2.6	-1.35	44.7	C4'-exo	25	0.95	not measured	34.6164	T
LEF1	seq_8	C	5.5	C-C	4.10355	0.7	-0.26	138	C1'-exo	8	-0.41	not measured	33.8296	C
LEF1	seq_8	C	8.5	C-T	4.33708	0.6	0.09	129.1	C1'-exo	5	-0.57	not measured	34.6321	T
LEF1	seq_9	B	-8.5	C-T	4.45016	0.5	-0.21	26.8	C3'-endo	13	-0.68	not measured	30.3703	C
LEF1	seq_9	B	-7.5	T-C	4.21288	0.8	0.23	147.5	C2'-endo	3	-0.4	not measured	37.0038	T
LEF1	seq_9	B	-6.5	C-C	4.16482	0.8	0.21	131.5	C1'-exo	4	-0.45	not measured	35.6274	C
LEF1	seq_9	C	-4.5	T-T	4.16935	1.2	-0.26	119	C1'-exo	6	-0.29	not measured	36.4164	T
LEF1	seq_9	C	-3.5	T-T	4.28603	0.8	-0.06	127.6	C1'-exo	6	-0.36	not measured	37.7355	T
LEF1	seq_9	C	-2.5	C-T	4.56341	0.2	0.35	138.9	C1'-exo	5	-0.64	not measured	37.5911	T
LEF1	seq_9	C	-1.5	C-C	4.45336	0.1	0.2	144.2	C2'-endo	3	-0.75	not measured	37.1361	C
LEF1	seq_9	B	0.5	T-C	4.51067	0.5	0	109.4	C1'-exo	8	-0.19	not measured	35.232	T
LEF1	seq_9	C	2.5	T-T	4.38085	1.1	-0.19	157.2	C2'-endo	37	0.91	3.30856	32.6767	T
LEF1	seq_9	C	3.5	T-T	4.48014	0.8	0.34	35.9	C3'-endo	18	0.39	3.61954	17.685	T
LEF1	seq_9	C	4.5	C-T	4.06656	2.4	-1.18	42	C4'-exo	24	0.97	not measured	33.4651	T
LEF1	seq_9	C	5.5	C-C	4.11607	1.1	-0.47	139.4	C1'-exo	9	0.04	not measured	37.1216	C
LEF1	seq_9	B	7.5	C-T	4.30858	0.7	0.04	136	C1'-exo	5	-0.47	not measured	37.2896	C
LEF1	seq_9	C	9.5	C-T	4.54077	0.4	0.26	148.4	C2'-endo	12	-0.72	not measured	29.543	T
NFY	seq_1	D	-7.5	T-C	4.32656	1.8	0.96	155.9	C2'-endo	7	0.72	not measured	42.7443	T
NFY	seq_1	D	-6.5	C-C	4.80221	0	-0.53	151.5	C2'-endo	2	0.44	not measured	42.7458	C
NFY	seq_1	D	-5.5	C-C	4.35082	1.4	0.48	153.6	C2'-endo	7	0.67	not measured	42.4038	C
NFY	seq_1	E	-3.5	C-T	4.59179	0.7	0.08	155.1	C2'-endo	8	0.42	not measured	40.4219	T
NFY	seq_1	D	-1.5	C-C	4.46757	1.1	1.26	66.2	C4'-exo	23	1.27	3.25081	38.8814	C
NFY	seq_1	E	0.5	T-T	4.20367	2.7	-1.87	65.1	C4'-exo	12	1.28	3.50634	46.0763	T
NFY	seq_1	D	2.5	T-C	4.99263	0.3	0.95	129.4	C1'-exo	13	1.88	not measured	46.0127	T
NFY	seq_1	E	4.5	C-T	5.01136	0	0.79	158.2	C2'-endo	9	0.65	not measured	40.9361	T
NFY	seq_1	E	5.5	T-C	4.35667	1.7	-0.95	156.4	C2'-endo	11	0.94	not measured	41.3537	C
NFY	seq_1	E	6.5	C-T	4.53238	0.4	0.25	154.4	C2'-endo	6	0.05	not measured	40.5342	T
NFY	seq_1	E	7.5	C-C	4.51299	0.1	0.3	150.7	C2'-endo	4	-0.13	not measured	37.406	C
NFY	seq_1	D	9.5	C-C	4.45543	0.9	0.28	87.4	O4'-endo	6	-0.39	not measured	38.8329	C
NFY	seq_10	E	-8.5	T-T	4.30824	1.6	-0.22	146.7	C2'-endo	12	0.62	not measured	40.5578	T
NFY	seq_10	E	-7.5	T-T	4.43112	1	0.03	147.4	C2'-endo	7	0.27	not measured	43.9447	T
NFY	seq_10	D	-5.5	C-C	4.13726	2	0.56	133.2	C1'-exo	9	0.59	not measured	37.88	C
NFY	seq_10	E	-3.5	C-C	4.62748	0.6	-0.35	154.2	C2'-endo	8	0.69	not measured	43.6327	C
NFY	seq_10	D	-1.5	C-C	4.44899	1.3	1.2	76.1	O4'-endo	21	1.15	3.29971	38.6192	C
NFY	seq_10	E	0.5	T-T	4.21341	2.6	-1.85	66.9	C4'-exo	14	1.2	3.43639	45.4467	T
NFY	seq_10	E	3.5	T-C	4.93172	0.5	-0.96	152.5	C2'-endo	12	1.8	not measured	49.2344	C
NFY	seq_10	E	4.5	C-T	5.20622	0	1.08	149.3	C2'-endo	13	0.45	not measured	41.7159	T
NFY	seq_10	E	5.5	T-C	4.24626	2.1	-0.93	151.6	C2'-endo	11	0.75	not measured	38.5393	C
NFY	seq_10	E	6.5	C-T	4.61114	0.3	0.35	154.4	C2'-endo	6	-0.02	not measured	39.9216	T
NFY	seq_10	E	7.5	C-C	4.39673	0.2	0.28	145	C2'-endo	4	-0.12	not measured	35.3017	C
NFY	seq_10	E	8.5	T-C	4.19454	1.4	-0.73	142.8	C1'-exo	5	0.23	not measured	41.1619	C
NFY	seq_10	E	9.5	C-T	4.7174	0.1	0.52	150	C2'-endo	8	-0.63	not measured	34.5923	T
NFY	seq_11	E	-8.5	C-C	4.34851	0.9	-0.21	145.2	C2'-endo	9	0.36	not measured	38.0305	C
NFY	seq_11	E	-7.5	C-C	4.60492	0.2	0.32	148.4	C2'-endo	3	0.62	not measured	44.8898	C
NFY	seq_11	E	-4.5	C-T	4.38232	1.4	-0.8	154.9	C2'-endo	8	0.74	not measured	46.9385	T
NFY	seq_11	E	-3.5	T-C	4.79157	0.2	-0.3	156.8	C2'-endo	6	0.83	not measured	46.3187	C
NFY	seq_11	D	-1.5	C-C	4.43721	1.4	1.21	80	O4'-endo	20	1.08	3.3589	38.3596	C
NFY	seq_11	E	0.5	T-T	4.16234	2.8	-1.79	67.6	C4'-exo	13	1.14	3.47806	44.4172	T
NFY	seq_11	D	2.5	T-C	5.18299	0	0.68	151.8	C2'-endo	8	1.97	not measured	46.9936	T
NFY	seq_11	E	6.5	C-T	4.47451	0.5	0.24	146.8	C2'-endo	5	0.02	not measured	37.9926	T
NFY	seq_11	E	7.5	C-C	4.47355	0.2	0.17	151.1	C2'-endo	4	-0.09	not measured	38.0164	C
NFY	seq_11	D	9.5	C-C	4.47676	0.8	0.25	118	C1'-exo	4	-0.2	not measured	42.0201	C
NFY	seq_12	D	-8.5	C-T	5.12472	0.1	-0.81	24.4	C3'-endo	14	0.09	not measured	32.1648	C
NFY	seq_12	D	-5.5	C-C	4.54995	1	0.47	154.1	C2'-endo	9	1.16	not measured	44.8041	C
NFY	seq_12	E	-3.5	C-T	4.58636	0.8	0.04	155.4	C2'-endo	9	0.56	not measured	41.541	T
NFY	seq_12	D	-1.5	C-C	4.45781	1.1	1.28	66.8	C4'-exo	24	1.28	3.24677	38.7943	C
NFY	seq_12	E	0.5	T-T	4.16519	2.8	-1.78	64.9	C4'-exo	14	1.26	3.44623	45.0688	T
NFY	seq_12	D	2.5	T-C	5.05226	0.2	0.77	118.1	C1'-exo	14	1.98	not measured	44.0814	T
NFY	seq_12	E	6.5	C-T	4.4932	0.7	0.3	147	C2'-endo	7	0.19	not measured	36.296	T
NFY	seq_12	D	8.5	C-C	4.47413	0.9	0.03	110.4	C1'-exo	8	0.09	not measured	35.854	C
NFY	seq_13	E	-8.5	C-T	4.39977	1	0.16	149	C2'-endo	10	0.1	not measured	38.9276	T
NFY	seq_13	D	-6.5	C-C	4.38225	1.1	0.48	153.3	C2'-endo	8	0.57	not measured	40.7788	C
NFY	seq_13	D	-5.5	C-C	4.90004	0	-0.41	158.5	C2'-endo	2	1.15	not measured	46.6424	C
NFY	seq_13	E	-3.5	C-T	4.56923	0.7	0.08	155.1	C2'-endo	9	0.48	not measured	41.1187	T
NFY	seq_13	D	-1.5	C-C	4.45029	1.1	1.29	68.1	C4'-exo	24	1.24	3.22787	38.9567	C
NFY	seq_13	E	0.5	T-T	4.18638	2.8	-1.8	68.4	C4'-exo	13	1.31	3.48569	44.8821	T
NFY	seq_13	D	2.5	T-C	4.73173	0.7	1.06	116.7	C1'-exo	15	1.65	not measured	43.3231	T
NFY	seq_13	E	4.5	T-T	4.22522	1.5	-0.06	156.8	C2'-endo	9	0.05	not measured	35.6619	T
NFY	seq_13	E	5.5	T-T	4.49238	0.8	0.01	152.2	C2'-endo	7	0.07	not measured	42.4499	T
NFY	seq_13	E	6.5	C-T	4.68531	0.4	0.41	151.8	C2'-endo	9	-0.03	not measured	35.8395	T
NFY	seq_13	D	8.5	C-T	4.45702	0.8	-0.13	135.1	C1'-exo	7	-0.05	not measured	39.2398	C
NFY	seq_14	D	-7.5	C-T	4.47601	0.8	0.02	135.7	C1'-exo	7	-0.03	not measured	41.2834	C
NFY	seq_14	D	-6.5	T-T	4.39153	0.9	-0.07	145.8	C2'-endo	6	-0.06	not measured	38.9674	T
NFY	seq_14	D	-5.5	T-C	4.10812	1.9	0.58	148.5	C2'-endo	6	0.3	not measured	36.9348	T
NFY	seq_14	E	-3.5	T-C	4.64141	0.8	-0.55	150.8	C2'-endo	10	0.8	not measured	40.589	C
NFY	seq_14	D	-1.5	C-C	4.42188	1.3	1.19	77	O4'-endo	22	1.2	3.28485	37.8079	C
NFY	seq_14	E	0.5	T-T	4.15752	2.8	-1.84	66.2	C4'-exo	13	1.27	3.46205	45.2042	T
NFY	seq_14	D	2.5	T-C	4.81929	0.5	1.09	124.5	C1'-exo	15	1.75	not measured	43.6885	T
NFY	seq_14	E	4.5	T-T	4.27122	1.4	-0.04	155.5	C2'-endo	8	-0.01	not measured	34.8244	T
NFY	seq_14	E	5.5	T-T	4.4163	0.9	-0.06	151	C2'-endo	6	0.06	not measured	42.1547	T
NFY	seq_14	E	6.5	C-T	4.51942	0.5	0.21	147.1	C2'-endo	5	-0.07	not measured	40.2164	T
NFY	seq_14	E	7.5	C-C	4.37014	0.4	0.16	146.9	C2'-endo	6	-0.08	not measured	37.0751	C
NFY	seq_14	E	8.5	C-C	4.2419	0.8	-0.23	142	C1'-exo	5	-0.04	not measured	38.6648	C
NFY	seq_15	E	-8.5	C-C	4.54397	0.8	-0.19	152.5	C2'-endo	10	0.49	not measured	42.3817	C
NFY	seq_15	D	-6.5	C-C	4.65082	0.2	-0.32	143.4	C1'-exo	2	0.32	not measured	43.531	C
NFY	seq_15	D	-5.5	C-C	4.24665	1.9	0.94	150.7	C2'-endo	10	1.04	not measured	43.3613	C
NFY	seq_15	D	-4.5	C-C	5.28392	0	-1.04	153.7	C2'-endo	6	1.03	not measured	49.2851	C
NFY	seq_15	D	-1.5	C-C	4.39922	1.4	1.26	67.7	C4'-exo	22	1.14	3.27306	37.596	C
NFY	seq_15	E	0.5	T-T	4.18003	2.8	-1.82	65.6	C4'-exo	13	1.2	3.49042	45.089	T
NFY	seq_15	D	2.5	T-C	4.89534	0.4	0.95	125.3	C1'-exo	14	1.81	not measured	44.503	T
NFY	seq_15	E	4.5	C-T	4.51004	0.8	0.3	156.8	C2'-endo	9	0.28	not measured	37.1165	T
NFY	seq_16	E	-4.5	C-C	4.29226	1.7	-1.06	152.6	C2'-endo	10	0.91	not measured	41.9598	C
NFY	seq_16	E	-3.5	T-C	4.5855	0.6	-0.47	156.6	C2'-endo	7	0.66	not measured	44.6118	C
NFY	seq_16	D	-1.5	C-C	4.44336	1.3	1.22	83	O4'-endo	21	1.21	3.31106	39.3273	C
NFY	seq_16	E	0.5	T-T	4.14387	2.8	-1.86	67.4	C4'-exo	13	1.22	3.44665	45.0797	T
NFY	seq_16	D	2.5	T-C	4.77908	0.9	1.07	130.9	C1'-exo	13	1.6	not measured	42.6841	T
NFY	seq_16	E	4.5	C-C	4.55508	0.7	0.15	156.7	C2'-endo	8	0.47	not measured	36.1721	C
NFY	seq_16	E	7.5	C-C	4.43707	0.3	0.23	153.7	C2'-endo	4	-0.01	not measured	36.8383	C
NFY	seq_17	D	-8.5	C-C	4.93371	0.1	-0.43	143.7	C1'-exo	5	0.14	not measured	39.2306	C
NFY	seq_17	D	-7.5	C-C	4.43162	1.3	0.52	158.6	C2'-endo	10	0.84	not measured	40.527	C
NFY	seq_17	E	-3.5	C-T	4.47954	0.9	-0.1	155.8	C2'-endo	9	0.43	not measured	40.7829	T
NFY	seq_17	D	-1.5	C-C	4.48112	1.1	1.21	69.2	C4'-exo	22	1.23	3.28412	38.0604	C
NFY	seq_17	E	0.5	T-T	4.16223	2.8	-1.9	65.4	C4'-exo	13	1.16	3.46684	45.7515	T
NFY	seq_17	E	3.5	C-C	5.01154	0	-0.64	153.2	C2'-endo	7	1.95	not measured	52.3793	C
NFY	seq_17	E	4.5	C-C	4.88462	0	0.88	158.1	C2'-endo	5	0.72	not measured	39.9297	C
NFY	seq_17	E	5.5	T-C	4.31548	1.7	-1.08	156.2	C2'-endo	11	1.03	not measured	42.296	C
NFY	seq_17	E	6.5	C-T	4.64616	0.3	0.34	158.9	C2'-endo	6	0.21	not measured	40.8316	T
NFY	seq_17	D	8.5	C-C	4.36531	0.7	0.05	140.1	C1'-exo	4	0	not measured	38.5091	C
NFY	seq_17	D	9.5	C-T	4.39425	1.4	0.19	108.8	C1'-exo	8	0	not measured	41.7145	C
NFY	seq_18	E	-8.5	T-T	4.24575	1.6	-0.21	145.6	C2'-endo	12	0.43	not measured	39.4739	T
NFY	seq_18	E	-7.5	T-T	4.38294	1	-0.01	144.4	C2'-endo	8	0.15	not measured	42.8268	T
NFY	seq_18	E	-4.5	C-C	4.24921	1.7	-1.01	149.3	C2'-endo	11	0.86	not measured	42.1193	C
NFY	seq_18	E	-3.5	T-C	4.58843	0.7	-0.47	153.6	C2'-endo	8	0.69	not measured	42.2448	C
NFY	seq_18	D	-1.5	C-C	4.4142	1.3	1.22	76.9	O4'-endo	22	1.25	3.27099	38.1112	C
NFY	seq_18	E	0.5	T-T	4.14108	2.8	-1.84	67.4	C4'-exo	15	1.22	3.39582	45.0104	T
NFY	seq_18	E	3.5	T-C	4.83878	0.7	-0.86	152.2	C2'-endo	12	1.68	not measured	44.779	C
NFY	seq_18	E	4.5	C-T	4.61269	0.7	0.34	155	C2'-endo	8	0.1	not measured	37.8342	T
NFY	seq_18	E	7.5	T-C	4.32931	0.9	-0.11	150.7	C2'-endo	10	0.25	not measured	34.1264	C
NFY	seq_18	D	9.5	T-C	4.39995	1.3	0.37	100.5	O4'-endo	7	0.03	not measured	37.8517	T
NFY	seq_19	E	-8.5	T-C	4.56234	1.2	-0.65	150	C2'-endo	14	1.17	not measured	41.6946	C
NFY	seq_19	E	-7.5	T-T	4.33273	1.3	-0.21	141.6	C1'-exo	8	0.15	not measured	41.6264	T
NFY	seq_19	D	-1.5	C-C	4.45044	1.1	1.27	78.5	O4'-endo	23	1.3	3.24934	39.2974	C
NFY	seq_19	E	0.5	T-T	4.16147	2.9	-1.88	70.6	C4'-exo	13	1.2	3.49354	44.5742	T
NFY	seq_19	D	2.5	T-C	5.05551	0.2	0.99	141	C1'-exo	12	1.88	not measured	46.2831	T
NFY	seq_19	E	4.5	C-T	4.99759	0	0.9	152.5	C2'-endo	9	0.52	not measured	39.0239	T
NFY	seq_19	E	5.5	T-C	4.39023	1.7	-1.04	155.5	C2'-endo	11	0.98	not measured	42.5031	C
NFY	seq_19	E	6.5	C-T	4.56785	0.5	0.23	151.2	C2'-endo	7	0.07	not measured	40.2403	T
NFY	seq_2	E	-7.5	C-C	4.57612	0.3	0.46	150.4	C2'-endo	3	0.45	not measured	41.442	C
NFY	seq_2	D	-5.5	C-C	4.36162	0.9	0.01	154.2	C2'-endo	7	0.82	not measured	43.7628	C
NFY	seq_2	E	-3.5	C-C	4.61901	0.6	-0.38	153.6	C2'-endo	7	0.66	not measured	43.215	C
NFY	seq_2	D	-1.5	C-C	4.51799	1.2	1.24	75.3	O4'-endo	21	1.21	3.35463	38.8655	C
NFY	seq_2	E	0.5	T-T	4.21449	2.8	-1.83	67.2	C4'-exo	12	1.2	3.54907	45.0639	T
NFY	seq_2	D	2.5	T-C	5.0403	0.2	0.91	137	C1'-exo	11	1.82	not measured	46.7378	T
NFY	seq_2	E	4.5	C-T	5.01587	0	0.85	158.1	C2'-endo	10	0.7	not measured	40.5487	T
NFY	seq_2	E	5.5	T-C	4.47443	1.3	-0.95	158	C2'-endo	12	1.13	not measured	42.9836	C
NFY	seq_2	E	6.5	C-T	4.55441	0.4	0.34	155.6	C2'-endo	5	0.13	not measured	40.8542	T
NFY	seq_2	E	7.5	T-C	4.38943	0.5	-0.1	147.1	C2'-endo	4	0.06	not measured	40.0117	C
NFY	seq_20	D	-7.5	T-C	4.39141	1.2	0.54	143.2	C1'-exo	6	0.41	not measured	42.5359	T
NFY	seq_20	D	-6.5	C-T	4.71469	0.1	-0.72	142.4	C1'-exo	5	0.04	not measured	39.6429	C
NFY	seq_20	D	-5.5	T-C	4.34514	1.8	1.06	156.6	C2'-endo	9	1.18	not measured	44.2578	T
NFY	seq_20	E	-3.5	C-C	4.58666	0.5	-0.32	156.9	C2'-endo	7	0.71	not measured	44.191	C
NFY	seq_20	D	-1.5	C-C	4.44391	1.2	1.27	73.1	O4'-endo	21	1.19	3.29314	38.5931	C
NFY	seq_20	E	0.5	T-T	4.20551	2.6	-1.88	66.9	C4'-exo	13	1.19	3.46287	45.621	T
NFY	seq_20	E	3.5	C-C	5.08579	0	-0.62	154.4	C2'-endo	7	1.98	not measured	53.5756	C
NFY	seq_20	E	4.5	C-C	4.83677	0	0.81	156.7	C2'-endo	4	0.67	not measured	39.7373	C
NFY	seq_20	E	5.5	T-C	4.16023	2	-1.02	153.8	C2'-endo	11	0.84	not measured	40.8757	C
NFY	seq_20	E	6.5	C-T	4.50217	0.4	0.34	154.7	C2'-endo	6	0.06	not measured	38.8914	T
NFY	seq_20	E	7.5	C-C	4.40638	0.3	0.08	148.2	C2'-endo	4	-0.06	not measured	37.7196	C
NFY	seq_21	D	-8.5	C-C	4.92717	0.2	-0.32	163.1	C2'-endo	5	0.35	not measured	40.964	C
NFY	seq_21	D	-7.5	C-C	4.44615	1.2	0.58	159.6	C2'-endo	10	0.95	not measured	41.5888	C
NFY	seq_21	E	-3.5	C-T	4.43235	1	-0.12	154.7	C2'-endo	9	0.42	not measured	40.4813	T
NFY	seq_21	D	-1.5	C-C	4.50756	1.1	1.24	69.5	C4'-exo	22	1.26	3.30667	38.8702	C
NFY	seq_21	E	0.5	T-T	4.22073	2.6	-1.82	66	C4'-exo	13	1.23	3.46329	46.1952	T
NFY	seq_21	E	3.5	C-C	5.12484	0	-0.57	154.2	C2'-endo	7	1.89	not measured	53.3002	C
NFY	seq_21	E	4.5	C-C	4.76674	0	0.78	154.9	C2'-endo	3	0.59	not measured	37.9529	C
NFY	seq_21	E	5.5	T-C	4.25517	1.8	-1.06	155.8	C2'-endo	11	0.95	not measured	41.8574	C
NFY	seq_21	E	6.5	C-T	4.64087	0.3	0.33	156.1	C2'-endo	7	0.24	not measured	40.163	T
NFY	seq_21	D	8.5	C-C	4.44299	0.5	-0.02	142.4	C1'-exo	4	0.06	not measured	39.3434	C
NFY	seq_21	D	9.5	C-T	4.44644	1.3	0.07	106	O4'-endo	9	0.03	not measured	40.9301	C
NFY	seq_22	D	-7.5	T-C	4.37918	1	0.41	141.5	C1'-exo	5	0.24	not measured	41.3392	T
NFY	seq_22	D	-6.5	C-T	4.75048	0.2	-0.73	133	C1'-exo	5	0.02	not measured	39.5203	C
NFY	seq_22	D	-5.5	T-C	4.3609	1.8	1.11	160.6	C2'-endo	9	1.22	not measured	44.5971	T
NFY	seq_22	E	-3.5	C-C	4.67678	0.4	-0.31	159.6	C2'-endo	8	0.76	not measured	45.0754	C
NFY	seq_22	D	-1.5	C-C	4.42967	1.3	1.37	75.3	O4'-endo	21	1.19	3.31017	38.9685	C
NFY	seq_22	E	0.5	T-T	4.19843	2.7	-1.91	67.6	C4'-exo	13	1.16	3.4957	45.4627	T
NFY	seq_22	E	3.5	C-C	5.15487	0	-0.61	154.2	C2'-endo	7	2	not measured	53.4392	C
NFY	seq_22	E	4.5	C-C	4.97072	0	0.89	157.8	C2'-endo	6	0.64	not measured	40.286	C
NFY	seq_22	E	5.5	T-C	4.17039	2.1	-1.02	153.2	C2'-endo	11	0.79	not measured	39.5888	C
NFY	seq_22	E	6.5	C-T	4.49652	0.4	0.22	154.5	C2'-endo	5	0	not measured	39.5263	T
NFY	seq_22	E	7.5	C-C	4.44139	0.2	0.2	149.4	C2'-endo	4	-0.15	not measured	36.7452	C
NFY	seq_23	E	-4.5	C-C	4.26226	1.8	-1.03	151.8	C2'-endo	10	0.85	not measured	41.2032	C
NFY	seq_23	E	-3.5	T-C	4.5579	0.8	-0.55	155.1	C2'-endo	8	0.65	not measured	43.0114	C
NFY	seq_23	D	-1.5	C-C	4.44793	1.3	1.18	83.2	O4'-endo	20	1.16	3.33842	38.2154	C
NFY	seq_23	E	0.5	T-T	4.19321	2.7	-1.91	65.9	C4'-exo	14	1.15	3.44751	45.5984	T
NFY	seq_23	E	3.5	C-C	5.26618	0	-0.4	154	C2'-endo	8	1.99	not measured	51.607	C
NFY	seq_23	E	4.5	C-C	4.4365	1	0.12	153.9	C2'-endo	9	0.31	not measured	33.6922	C
NFY	seq_23	D	6.5	C-T	4.43132	0.7	-0.28	141.5	C1'-exo	7	-0.01	not measured	36.9167	C
NFY	seq_23	D	7.5	T-C	4.2188	1.5	0.59	144.2	C2'-endo	6	0.32	not measured	40.4693	T
NFY	seq_24	D	-7.5	C-C	4.46567	0.8	0.22	158.3	C2'-endo	5	0.33	not measured	41.8015	C
NFY	seq_24	E	-3.5	T-T	4.41302	1.2	-0.3	155.5	C2'-endo	10	0.49	not measured	40.0785	T
NFY	seq_24	D	-1.5	C-C	4.43244	1.3	1.36	70.6	C4'-exo	22	1.18	3.30966	38.6483	C
NFY	seq_24	E	0.5	T-T	4.17877	2.8	-1.93	66.7	C4'-exo	13	1.14	3.48635	45.7754	T
NFY	seq_24	E	3.5	C-C	5.13971	0	-0.57	155.2	C2'-endo	7	2	not measured	53.3641	C
NFY	seq_24	E	4.5	C-C	4.92537	0	0.75	158.2	C2'-endo	5	0.81	not measured	40.679	C
NFY	seq_24	E	5.5	T-C	4.27008	1.8	-0.98	154.5	C2'-endo	11	0.92	not measured	40.9821	C
NFY	seq_24	E	6.5	C-T	4.56818	0.3	0.28	156	C2'-endo	6	0.1	not measured	40.7345	T
NFY	seq_24	E	7.5	C-C	4.53293	0.1	0.26	152.2	C2'-endo	3	-0.07	not measured	38.7553	C
NFY	seq_24	D	9.5	C-C	4.40779	0.9	0.3	123.6	C1'-exo	4	-0.28	not measured	40.6138	C
NFY	seq_25	E	-6.5	T-T	4.45426	0.9	0.03	144.2	C2'-endo	7	0.14	not measured	40.5133	T
NFY	seq_25	E	-3.5	C-T	4.53354	0.7	-0.08	151.5	C2'-endo	7	0.29	not measured	41.3906	T
NFY	seq_25	D	-1.5	C-C	4.4931	1	1.26	68.7	C4'-exo	22	1.28	3.28548	38.8547	C
NFY	seq_25	E	0.5	T-T	4.19825	2.7	-1.9	67.2	C4'-exo	13	1.2	3.46127	45.8835	T
NFY	seq_25	E	3.5	C-C	5.10283	0	-0.44	151.7	C2'-endo	10	1.86	not measured	49.2181	C
NFY	seq_25	E	6.5	C-T	4.48802	0.5	0.21	152.5	C2'-endo	5	0.02	not measured	40.7719	T
NFY	seq_25	E	9.5	C-C	4.71089	0.2	0.22	153.8	C2'-endo	6	0.06	not measured	35.1601	C
NFY	seq_26	E	-8.5	C-T	4.3476	1.4	-0.24	144.8	C2'-endo	13	0.54	not measured	41.6069	T
NFY	seq_26	E	-3.5	C-C	4.61985	0.5	-0.2	147.7	C2'-endo	7	0.57	not measured	42.3241	C
NFY	seq_26	D	-1.5	C-C	4.48177	1.2	1.22	77.4	O4'-endo	21	1.2	3.3084	39.4135	C
NFY	seq_26	E	0.5	T-T	4.15958	2.9	-1.87	70.3	C4'-exo	13	1.11	3.48401	45.2715	T
NFY	seq_26	E	3.5	C-C	4.95402	0.3	-0.6	150.6	C2'-endo	11	1.73	not measured	47.8977	C
NFY	seq_26	E	6.5	C-T	4.58817	0.4	0.27	150.2	C2'-endo	7	0.14	not measured	39.3611	T
NFY	seq_26	E	9.5	C-C	4.56398	0.3	0.24	147.6	C2'-endo	5	-0.15	not measured	36.8649	C
NFY	seq_27	D	-8.5	T-C	4.54644	1.1	0.32	194.4	C3'-exo	8	0.85	not measured	42.0527	T
NFY	seq_27	D	-5.5	C-C	4.54465	0.9	0.37	156.1	C2'-endo	8	1.22	not measured	42.1519	C
NFY	seq_27	E	-3.5	C-T	4.53259	0.8	0.06	155	C2'-endo	10	0.46	not measured	40.5885	T
NFY	seq_27	D	-1.5	C-C	4.46331	1.2	1.24	70.5	C4'-exo	22	1.23	3.29935	38.2236	C
NFY	seq_27	E	0.5	T-T	4.2223	2.6	-1.84	65.8	C4'-exo	14	1.25	3.45198	46.5231	T
NFY	seq_27	E	3.5	C-C	5.23489	0	0.08	150.9	C2'-endo	10	1.62	not measured	47.8588	C
NFY	seq_27	E	4.5	T-C	4.22242	2.4	-0.78	153.3	C2'-endo	11	0.53	not measured	36.6607	C
NFY	seq_27	E	5.5	T-T	4.30601	1.3	-0.21	148.2	C2'-endo	6	0.09	not measured	40.8277	T
NFY	seq_27	E	6.5	C-T	4.68976	0.4	0.41	149.3	C2'-endo	10	0.16	not measured	35.4764	T
NFY	seq_27	E	9.5	C-C	4.61139	0.1	0.38	148	C2'-endo	6	-0.29	not measured	34.7802	C
NFY	seq_28	D	-8.5	C-C	4.95228	0.1	-0.44	153.8	C2'-endo	6	-0.03	not measured	40.79	C
NFY	seq_28	D	-7.5	C-C	4.39466	1.6	0.97	158.2	C2'-endo	10	0.92	not measured	44.4633	C
NFY	seq_28	D	-6.5	C-C	5.10839	0	-0.82	156.7	C2'-endo	7	1.16	not measured	47.2814	C
NFY	seq_28	D	-5.5	C-C	4.72885	0.2	0.44	161.5	C2'-endo	3	1.69	not measured	51.2209	C
NFY	seq_28	E	-3.5	C-C	4.54072	0.6	-0.35	156	C2'-endo	8	0.62	not measured	43.6892	C
NFY	seq_28	D	-1.5	C-C	4.52673	1.2	1.2	78.2	O4'-endo	21	1.2	3.34709	39.8754	C
NFY	seq_28	E	0.5	T-T	4.17403	2.7	-1.89	67	C4'-exo	14	1.18	3.44757	45.3847	T
NFY	seq_28	E	3.5	C-C	5.31114	0	0.02	154	C2'-endo	11	1.74	not measured	47.5803	C
NFY	seq_28	E	4.5	T-C	4.22037	2.1	-0.51	153.6	C2'-endo	9	0.44	not measured	34.4723	C
NFY	seq_28	E	5.5	T-T	4.37749	0.9	-0.03	147.9	C2'-endo	6	0.13	not measured	40.8607	T
NFY	seq_28	E	6.5	T-T	4.58509	0.6	0.13	148.1	C2'-endo	8	0.07	not measured	40.6452	T
NFY	seq_28	D	8.5	C-T	4.24392	1	0	112.6	C1'-exo	6	-0.47	not measured	34.6449	C
NFY	seq_28	D	9.5	T-C	4.26612	1.1	0.47	128.9	C1'-exo	3	-0.21	not measured	39.7321	T
NFY	seq_29	D	-5.5	C-C	4.31774	1.7	0.94	156.1	C2'-endo	10	1.05	not measured	43.1611	C
NFY	seq_29	D	-4.5	C-C	5.29496	0	-0.97	154.3	C2'-endo	5	1.23	not measured	50.3409	C
NFY	seq_29	D	-1.5	C-C	4.44011	1.4	1.17	70.2	C4'-exo	21	1.06	3.3241	36.4922	C
NFY	seq_29	E	0.5	T-T	4.20992	2.7	-1.84	65.7	C4'-exo	13	1.18	3.48602	44.6015	T
NFY	seq_29	E	3.5	C-C	5.15073	0	-0.53	153.2	C2'-endo	8	1.8	not measured	51.5096	C
NFY	seq_29	E	4.5	C-C	4.72763	0	0.81	152	C2'-endo	3	0.45	not measured	36.0882	C
NFY	seq_29	E	5.5	T-C	4.24212	1.8	-0.93	153.4	C2'-endo	11	0.86	not measured	39.183	C
NFY	seq_29	E	6.5	T-T	4.38256	1	-0.07	149.3	C2'-endo	7	0.19	not measured	41.2521	T
NFY	seq_3	E	-8.5	T-T	4.25679	1.8	-0.51	147.4	C2'-endo	11	0.37	not measured	41.5092	T
NFY	seq_3	D	-6.5	C-C	5.25129	0	-0.44	149.6	C2'-endo	10	0.91	not measured	51.4562	C
NFY	seq_3	E	-4.5	C-C	4.29554	1.8	-1.11	153.5	C2'-endo	10	0.89	not measured	41.8036	C
NFY	seq_3	E	-3.5	T-C	4.62344	0.7	-0.48	153.7	C2'-endo	8	0.7	not measured	42.5266	C
NFY	seq_3	D	-1.5	C-C	4.45519	1.2	1.23	81.8	O4'-endo	21	1.22	3.30112	39.21	C
NFY	seq_3	E	0.5	T-T	4.12952	2.9	-1.9	65.8	C4'-exo	13	1.24	3.46032	45.6791	T
NFY	seq_3	D	2.5	T-C	4.92442	0.5	0.99	114.6	C1'-exo	15	1.75	not measured	44.2053	T
NFY	seq_3	E	4.5	C-T	4.46536	1	0.18	156.8	C2'-endo	8	0.15	not measured	37.131	T
NFY	seq_3	E	7.5	C-C	4.40415	0.4	0.13	150.5	C2'-endo	5	-0.07	not measured	36.2981	C
NFY	seq_3	D	9.5	C-C	4.44475	0.8	0.18	100.2	O4'-endo	4	-0.35	not measured	38.5443	C
NFY	seq_30	E	-8.5	T-T	4.31158	1.5	-0.3	148.2	C2'-endo	12	0.5	not measured	40.5245	T
NFY	seq_30	E	-7.5	T-T	4.46337	0.8	0.07	147.2	C2'-endo	7	0.02	not measured	40.4564	T
NFY	seq_30	D	-5.5	T-C	4.09951	2.2	0.67	140.1	C1'-exo	9	0.43	not measured	36.6881	T
NFY	seq_30	D	-4.5	C-C	5.2032	0	-0.92	152.7	C2'-endo	4	0.93	not measured	46.4594	C
NFY	seq_30	D	-1.5	C-C	4.41327	1.2	1.27	75.7	O4'-endo	22	1.27	3.26433	38.0455	C
NFY	seq_30	E	0.5	T-T	4.11567	2.9	-1.88	68.9	C4'-exo	15	1.14	3.40341	44.559	T
NFY	seq_30	E	3.5	C-C	5.27692	0	-0.49	153.7	C2'-endo	8	2.13	not measured	52.4017	C
NFY	seq_30	E	4.5	C-C	4.43036	1	0.1	156	C2'-endo	9	0.37	not measured	36.0812	C
NFY	seq_31	D	-7.5	C-C	4.47066	0.8	0.25	134.8	C1'-exo	6	0.28	not measured	41.6412	C
NFY	seq_31	D	-6.5	C-T	4.49249	0.6	-0.39	146.4	C2'-endo	5	0.01	not measured	39.536	C
NFY	seq_31	D	-5.5	T-C	4.26119	2	1.07	153.1	C2'-endo	8	1.06	not measured	43.3594	T
NFY	seq_31	D	-2.5	T-C	4.17637	1.4	0.51	153.4	C2'-endo	10	0.42	not measured	37.5286	T
NFY	seq_31	D	-1.5	C-C	4.35957	1.6	1.13	90.8	O4'-endo	20	0.99	3.31453	36.7235	C
NFY	seq_31	E	0.5	T-T	4.18241	2.7	-1.78	65.7	C4'-exo	13	1.07	3.46056	45.291	T
NFY	seq_31	E	3.5	C-C	5.12393	0	-0.67	153.5	C2'-endo	8	2.02	not measured	53.9487	C
NFY	seq_31	E	4.5	C-C	5.06906	0	0.99	158.8	C2'-endo	8	0.73	not measured	40.4718	C
NFY	seq_31	E	5.5	T-C	4.17909	2	-1.07	153.5	C2'-endo	11	0.84	not measured	40.7948	C
NFY	seq_31	E	6.5	C-T	4.55203	0.3	0.33	153.9	C2'-endo	5	0	not measured	39.9645	T
NFY	seq_31	E	7.5	C-C	4.46146	0.2	0.14	150.4	C2'-endo	3	-0.21	not measured	38.0304	C
NFY	seq_31	D	9.5	C-T	4.42441	1.1	0.19	115.7	C1'-exo	7	-0.3	not measured	42.1284	C
NFY	seq_32	D	-8.5	T-C	4.86941	0.7	0.37	163.4	C2'-endo	8	1.07	not measured	42.205	T
NFY	seq_32	D	-5.5	C-C	4.45649	1.4	0.77	155.4	C2'-endo	10	1.15	not measured	44.5652	C
NFY	seq_32	D	-2.5	T-C	4.20686	1.5	0.35	126.7	C1'-exo	12	0.49	not measured	35.451	T
NFY	seq_32	D	-1.5	C-C	4.34893	1.5	1.31	83.9	O4'-endo	22	1.12	3.23096	37.8651	C
NFY	seq_32	E	0.5	T-T	4.19853	2.8	-1.76	65	C4'-exo	14	1.07	3.4757	44.6493	T
NFY	seq_32	E	3.5	C-C	4.71652	0.8	-0.88	152	C2'-endo	11	1.52	not measured	49.2055	C
NFY	seq_32	E	4.5	C-C	5.03828	0	1.01	151	C2'-endo	7	0.64	not measured	42.6233	C
NFY	seq_32	E	5.5	T-C	4.31619	1.7	-1.15	150.4	C2'-endo	13	1.14	not measured	39.6452	C
NFY	seq_32	E	6.5	T-T	4.37454	1.1	0.06	149.5	C2'-endo	8	0.25	not measured	40.39	T
NFY	seq_32	D	8.5	C-C	4.19773	0.9	0.06	111.2	C1'-exo	8	-0.35	not measured	31.8011	C
NFY	seq_32	D	9.5	C-T	4.25341	1.3	0.11	125.9	C1'-exo	5	-0.33	not measured	40.381	C
NFY	seq_33	D	-8.5	C-C	4.90795	0.2	-0.13	168.3	C2'-endo	7	0.66	not measured	41.9412	C
NFY	seq_33	E	-6.5	T-C	4.50928	1	-0.24	149.5	C2'-endo	6	0.37	not measured	42.5888	C
NFY	seq_33	D	-2.5	C-C	4.26363	1.3	0.12	129.9	C1'-exo	11	0.39	not measured	34.8661	C
NFY	seq_33	D	-1.5	C-C	4.46557	1.2	1.25	87.3	O4'-endo	21	1.22	3.25929	41.5983	C
NFY	seq_33	E	0.5	T-T	4.20612	2.7	-1.86	67	C4'-exo	14	1.21	3.45378	45.434	T
NFY	seq_33	E	3.5	C-C	5.04923	0	-0.68	153	C2'-endo	8	1.88	not measured	53.3072	C
NFY	seq_33	E	4.5	C-C	4.82835	0	0.88	154.1	C2'-endo	5	0.65	not measured	36.8172	C
NFY	seq_33	E	5.5	T-C	4.23959	1.9	-0.92	153.2	C2'-endo	11	0.88	not measured	40.442	C
NFY	seq_33	E	6.5	C-T	4.48097	0.6	0.23	153.1	C2'-endo	8	0.09	not measured	39.3518	T
NFY	seq_33	E	9.5	T-C	4.40196	1.1	-0.2	152.7	C2'-endo	5	0.22	not measured	42.1591	C
NFY	seq_34	D	-8.5	C-C	4.9001	0.4	-0.16	165.1	C2'-endo	12	0.79	not measured	36.2236	C
NFY	seq_34	E	-6.5	C-T	4.53416	0.6	0.53	152.6	C2'-endo	6	0.19	not measured	38.4697	T
NFY	seq_34	E	-3.5	T-C	4.7168	0.5	-0.42	158.3	C2'-endo	8	0.79	not measured	43.2279	C
NFY	seq_34	D	-1.5	C-C	4.44068	1.3	1.21	84.4	O4'-endo	20	1.15	3.30769	38.3298	C
NFY	seq_34	E	0.5	T-T	4.13018	2.9	-1.87	68.3	C4'-exo	14	1.12	3.42944	45.2805	T
NFY	seq_34	E	3.5	C-C	5.00936	0.1	-0.76	150	C2'-endo	10	2	not measured	49.0307	C
NFY	seq_34	E	6.5	C-T	4.57844	0.4	0.28	153.2	C2'-endo	7	0.16	not measured	39.8313	T
NFY	seq_34	E	9.5	C-C	4.6863	0	0.35	152.4	C2'-endo	7	-0.2	not measured	37.6149	C
NFY	seq_35	D	-5.5	C-C	4.85152	0.1	0.38	154.6	C2'-endo	4	1.47	not measured	48.8503	C
NFY	seq_35	D	-2.5	C-C	4.35363	0.7	-0.08	151.6	C2'-endo	8	0.25	not measured	34.3577	C
NFY	seq_35	D	-1.5	C-C	4.46074	1.3	1.28	85	O4'-endo	20	1.12	3.31113	40.3133	C
NFY	seq_35	E	0.5	T-T	4.22339	2.6	-1.77	67	C4'-exo	13	1.11	3.48437	44.9343	T
NFY	seq_35	E	3.5	C-C	4.98588	0.2	-0.71	152.4	C2'-endo	8	1.77	not measured	51.4571	C
NFY	seq_35	E	4.5	C-C	5.01463	0	1	155.8	C2'-endo	7	0.6	not measured	39.8468	C
NFY	seq_35	E	5.5	T-C	4.09649	2.5	-1.14	150.5	C2'-endo	11	0.74	not measured	39.3588	C
NFY	seq_35	E	6.5	C-T	4.4853	0.5	0.24	152.1	C2'-endo	6	0.01	not measured	38.6399	T
NFY	seq_35	E	7.5	C-C	4.34565	0.4	0.13	142.3	C1'-exo	6	-0.15	not measured	34.0029	C
NFY	seq_36	D	-8.5	C-T	4.8578	0.1	-0.52	153.4	C2'-endo	9	-0.33	not measured	38.5746	C
NFY	seq_36	D	-7.5	T-C	4.33577	1.7	0.85	155.6	C2'-endo	8	0.62	not measured	42.9365	T
NFY	seq_36	D	-6.5	C-T	4.97029	0	-1.11	152.6	C2'-endo	9	0.09	not measured	38.4583	C
NFY	seq_36	D	-5.5	T-C	4.59088	1.5	1.19	144.7	C2'-endo	12	1.4	not measured	48.6235	T
NFY	seq_36	E	-3.5	T-T	4.46195	1.1	-0.43	157	C2'-endo	12	0.69	not measured	43.3932	T
NFY	seq_36	D	-1.5	C-C	4.40105	1.1	1.45	71.4	C4'-exo	24	1.32	3.2412	39.8883	C
NFY	seq_36	E	0.5	T-T	4.1584	2.8	-1.87	67.1	C4'-exo	13	1.17	3.43321	46.0802	T
NFY	seq_36	E	3.5	C-C	5.07235	0	0.25	150.4	C2'-endo	8	1.28	not measured	46.0002	C
NFY	seq_36	E	4.5	T-C	4.26082	2.3	-0.86	153.7	C2'-endo	10	0.65	not measured	37.1161	C
NFY	seq_36	E	5.5	T-T	4.39254	1	0.1	146.6	C2'-endo	7	0.13	not measured	40.31	T
NFY	seq_36	E	6.5	C-T	4.58587	0.5	0.3	151.4	C2'-endo	10	0.14	not measured	33.0198	T
NFY	seq_36	E	7.5	T-C	4.26484	1.4	-0.49	79.5	O4'-endo	5	0.13	not measured	45.3643	C
NFY	seq_37	D	-8.5	T-C	4.71493	0.3	-0.02	154.9	C2'-endo	6	0.6	not measured	42.1699	T
NFY	seq_37	D	-7.5	C-T	4.56739	0.2	-0.17	150.9	C2'-endo	5	0.17	not measured	40.5343	C
NFY	seq_37	D	-6.5	T-C	4.27335	1.3	0.4	153.1	C2'-endo	8	0.69	not measured	40.5291	T
NFY	seq_37	D	-5.5	C-C	4.45302	1.3	1.06	84.7	O4'-endo	19	1.26	not measured	36.4324	C
NFY	seq_37	E	-3.5	C-T	4.28468	2	-1.38	63.2	C4'-exo	12	0.98	not measured	45.7579	T
NFY	seq_37	D	-1.5	T-C	4.84181	0.5	0.91	149.4	C2'-endo	13	1.7	3.63555	45.8479	T
NFY	seq_37	E	0.5	T-T	4.35783	1.5	-0.23	157.5	C2'-endo	9	0.04	3.77306	39.4419	T
NFY	seq_37	E	3.5	C-C	4.28016	0.9	-0.15	150.9	C2'-endo	8	0.06	not measured	37.2942	C
NFY	seq_37	E	4.5	C-C	4.19057	0.6	0.06	145.4	C2'-endo	9	-0.1	not measured	35.4415	C
NFY	seq_37	E	5.5	T-C	4.06486	1.2	-0.43	142.1	C1'-exo	8	0.14	not measured	39.2318	C
NFY	seq_37	E	6.5	C-T	4.34748	0.6	0.18	147.6	C2'-endo	6	-0.17	not measured	36.7046	T
NFY	seq_37	E	7.5	C-C	4.54752	0.1	0.21	157.5	C2'-endo	10	-0.17	not measured	33.7376	C
NFY	seq_37	E	8.5	C-C	4.25952	0.7	-0.17	63.4	C4'-exo	3	0.02	not measured	43.1457	C
NFY	seq_37	E	9.5	T-C	4.30054	1.6	-0.77	147.4	C2'-endo	5	0.33	not measured	38.9542	C
NFY	seq_38	D	-6.5	T-C	4.32597	0.9	0.12	126.4	C1'-exo	3	-0.03	not measured	39.7787	T
NFY	seq_38	D	-5.5	C-C	4.27023	1.8	0.6	147.4	C2'-endo	8	0.79	not measured	40.2924	C
NFY	seq_38	D	-4.5	C-T	5.23528	0	-0.78	154.8	C2'-endo	10	1.03	not measured	47.6683	C
NFY	seq_38	D	-1.5	C-C	4.4433	1.3	1.21	72.6	O4'-endo	21	1.11	3.29512	38.166	C
NFY	seq_38	E	0.5	T-T	4.19483	2.7	-1.88	66.8	C4'-exo	13	1.18	3.48133	44.5453	T
NFY	seq_38	E	3.5	C-C	5.23359	0	-0.5	155.6	C2'-endo	9	1.93	not measured	53.5144	C
NFY	seq_38	E	4.5	C-C	4.86433	0	0.86	154	C2'-endo	5	0.63	not measured	37.5818	C
NFY	seq_38	E	5.5	T-C	4.26757	1.8	-0.95	154.8	C2'-endo	10	0.9	not measured	41.7578	C
NFY	seq_38	E	6.5	C-T	4.5576	0.5	0.25	154.5	C2'-endo	6	0.13	not measured	40.5906	T
NFY	seq_39	E	-8.5	C-C	4.43984	0.9	-0.06	147.8	C2'-endo	10	0.75	not measured	40.2019	C
NFY	seq_39	E	-7.5	T-C	4.60848	0.6	-0.32	149.7	C2'-endo	6	0.69	not measured	46.0204	C
NFY	seq_39	D	-5.5	C-T	4.18298	1.7	0.26	142	C1'-exo	7	0.12	not measured	39.961	C
NFY	seq_39	E	-3.5	T-C	4.7567	0.5	-0.39	155.4	C2'-endo	8	0.91	not measured	42.5744	C
NFY	seq_39	D	-1.5	C-C	4.48653	1.2	1.25	79.6	O4'-endo	21	1.27	3.33202	38.5936	C
NFY	seq_39	E	0.5	T-T	4.16551	2.7	-1.78	65.4	C4'-exo	14	1.19	3.42379	45.236	T
NFY	seq_39	E	3.5	C-C	5.23353	0	-0.06	151.2	C2'-endo	10	1.71	not measured	48.0336	C
NFY	seq_39	E	4.5	T-C	4.33348	2	-0.67	156.2	C2'-endo	9	0.59	not measured	38.6882	C
NFY	seq_39	E	5.5	T-T	4.41275	1	-0.03	148.6	C2'-endo	7	0.1	not measured	41.4736	T
NFY	seq_39	E	6.5	C-T	4.75249	0.3	0.34	150.9	C2'-endo	9	0.02	not measured	39.1113	T
NFY	seq_39	E	9.5	C-T	4.91857	0	0.81	157	C2'-endo	12	-0.43	not measured	30.5864	T
NFY	seq_4	D	-8.5	T-C	4.4357	1.2	0.31	143.9	C1'-exo	4	0.2	not measured	39.4176	T
NFY	seq_4	D	-7.5	C-C	4.41663	1.1	0.6	148.7	C2'-endo	5	0.54	not measured	45.2402	C
NFY	seq_4	D	-6.5	C-C	4.67342	0.1	-0.37	151.4	C2'-endo	2	0.35	not measured	42.8476	C
NFY	seq_4	D	-5.5	C-C	4.39922	1.3	0.58	160.5	C2'-endo	8	0.99	not measured	42.9115	C
NFY	seq_4	E	-3.5	T-T	4.39854	1.2	-0.34	154.7	C2'-endo	10	0.52	not measured	41.0522	T
NFY	seq_4	D	-1.5	C-C	4.42996	1.2	1.42	71.4	C4'-exo	23	1.26	3.27646	39.061	C
NFY	seq_4	E	0.5	T-T	4.20102	2.7	-1.83	67.7	C4'-exo	12	1.23	3.49346	45.5737	T
NFY	seq_4	D	2.5	T-C	5.10862	0.1	0.82	146.4	C2'-endo	9	1.89	not measured	46.4631	T
NFY	seq_4	E	4.5	C-T	4.86321	0	0.73	152.3	C2'-endo	8	0.47	not measured	39.1916	T
NFY	seq_4	E	5.5	T-C	4.26155	1.9	-1	155.1	C2'-endo	9	0.81	not measured	41.2585	C
NFY	seq_4	E	6.5	C-T	4.55078	0.3	0.35	153.7	C2'-endo	5	-0.03	not measured	39.0948	T
NFY	seq_4	E	7.5	C-C	4.45604	0.2	0.17	150.4	C2'-endo	3	-0.17	not measured	39.2073	C
NFY	seq_40	D	-5.5	C-C	4.43104	1.5	1.02	155.3	C2'-endo	9	1.19	not measured	45.5802	C
NFY	seq_40	D	-4.5	C-C	5.29252	0	-1.07	156.1	C2'-endo	5	1.19	not measured	50.2866	C
NFY	seq_40	D	-1.5	C-C	4.41875	1.4	1.21	74.9	O4'-endo	21	1.07	3.30224	37.4785	C
NFY	seq_40	E	0.5	T-T	4.16508	2.9	-1.86	65.6	C4'-exo	13	1.06	3.48387	44.5862	T
NFY	seq_40	E	3.5	C-C	4.92163	0.2	-0.67	149.3	C2'-endo	10	1.74	not measured	47.8644	C
NFY	seq_40	E	6.5	C-T	4.4433	0.5	0.27	151.1	C2'-endo	6	0.08	not measured	39.3503	T
NFY	seq_40	E	7.5	C-C	4.45758	0.4	0.12	152	C2'-endo	4	0.2	not measured	39.7299	C
NFY	seq_40	E	8.5	C-C	4.3809	0.6	-0.23	150.6	C2'-endo	3	0.07	not measured	40.6006	C
NFY	seq_41	D	-8.5	C-T	5.00054	0.3	-0.71	32.6	C3'-endo	15	0	not measured	30.9694	C
NFY	seq_41	D	-5.5	C-C	4.23811	1.7	0.52	138.4	C1'-exo	10	0.64	not measured	37.9415	C
NFY	seq_41	E	-3.5	C-T	4.60884	0.6	0.08	154.5	C2'-endo	9	0.43	not measured	42.0158	T
NFY	seq_41	D	-1.5	C-C	4.51554	1	1.18	62.1	C4'-exo	23	1.3	3.28012	38.2949	C
NFY	seq_41	E	0.5	T-T	4.23363	2.6	-1.85	66.6	C4'-exo	14	1.24	3.44496	45.7158	T
NFY	seq_41	E	3.5	T-C	4.84163	0.7	-1.05	153.1	C2'-endo	13	1.76	not measured	48.8635	C
NFY	seq_41	E	4.5	C-T	5.27111	0	1.22	149.2	C2'-endo	13	0.4	not measured	42.1432	T
NFY	seq_41	E	5.5	T-C	4.22443	2.1	-1.02	152.7	C2'-endo	11	0.85	not measured	39.2388	C
NFY	seq_41	E	6.5	C-T	4.71553	0.2	0.45	157.1	C2'-endo	7	0.08	not measured	39.8869	T
NFY	seq_42	E	-8.5	T-T	4.237	1.8	-0.31	145.8	C2'-endo	12	0.5	not measured	39.6462	T
NFY	seq_42	E	-7.5	T-T	4.3602	1.1	-0.01	146	C2'-endo	7	0.1	not measured	43.0346	T
NFY	seq_42	D	-5.5	C-C	4.16493	1.9	0.53	132.8	C1'-exo	9	0.52	not measured	37.0999	C
NFY	seq_42	E	-3.5	C-C	4.56995	0.8	-0.42	153	C2'-endo	8	0.64	not measured	42.8928	C
NFY	seq_42	D	-1.5	C-C	4.47643	1.2	1.24	74.1	O4'-endo	22	1.24	3.2996	39.5108	C
NFY	seq_42	E	0.5	T-T	4.21719	2.7	-1.85	65	C4'-exo	14	1.16	3.45704	45.6354	T
NFY	seq_42	E	3.5	T-C	4.85604	0.8	-1.01	154.3	C2'-endo	13	1.73	not measured	48.7095	C
NFY	seq_42	E	4.5	C-T	5.31403	0	1.2	149.7	C2'-endo	13	0.46	not measured	42.8364	T
NFY	seq_42	E	5.5	T-C	4.30351	2	-0.97	151.7	C2'-endo	11	0.84	not measured	39.1487	C
NFY	seq_42	E	6.5	C-T	4.65103	0.3	0.33	155.2	C2'-endo	6	0.02	not measured	40.523	T
NFY	seq_42	E	7.5	C-C	4.48031	0.1	0.37	148.1	C2'-endo	4	-0.09	not measured	34.6282	C
NFY	seq_42	E	8.5	T-C	4.17858	1.4	-0.71	141.4	C1'-exo	5	0.14	not measured	40.5125	C
NFY	seq_42	E	9.5	C-T	4.64885	0.2	0.46	152.3	C2'-endo	12	-0.71	not measured	31.1204	T
NFY	seq_43	E	-8.5	T-T	4.23842	1.6	-0.23	144	C2'-endo	12	0.45	not measured	38.8302	T
NFY	seq_43	E	-7.5	T-T	4.4745	0.8	0.01	146.4	C2'-endo	8	0.23	not measured	43.4751	T
NFY	seq_43	E	-4.5	C-C	4.26531	1.7	-1	151	C2'-endo	11	0.9	not measured	41.9	C
NFY	seq_43	E	-3.5	T-C	4.67201	0.5	-0.43	158.1	C2'-endo	8	0.72	not measured	44.6995	C
NFY	seq_43	D	-1.5	C-C	4.39753	1.4	1.28	79	O4'-endo	22	1.2	3.27684	39.8289	C
NFY	seq_43	E	0.5	T-T	4.14759	2.8	-1.74	67.9	C4'-exo	14	1.12	3.41052	43.5818	T
NFY	seq_43	E	3.5	T-C	4.86962	0.8	-0.83	153.6	C2'-endo	12	1.63	not measured	44.9996	C
NFY	seq_43	E	4.5	C-T	4.67078	0.5	0.42	156.6	C2'-endo	8	-0.02	not measured	37.8596	T
NFY	seq_43	E	7.5	T-C	4.40548	0.7	-0.08	152.7	C2'-endo	7	0.17	not measured	35.9292	C
NFY	seq_43	D	9.5	T-C	4.39508	1.3	0.42	99.7	O4'-endo	7	0.06	not measured	38.1048	T
NFY	seq_44	D	-8.5	C-C	4.59666	0.6	0.13	166.9	C2'-endo	4	-0.03	not measured	41.7341	C
NFY	seq_44	D	-7.5	C-T	4.56726	0.5	-0.38	152.8	C2'-endo	6	0.01	not measured	40.8293	C
NFY	seq_44	D	-6.5	T-C	4.39165	1.5	0.9	152.5	C2'-endo	5	0.85	not measured	45.6518	T
NFY	seq_44	D	-5.5	C-C	4.53019	0.4	-0.45	157.5	C2'-endo	5	0.51	not measured	34.8552	C
NFY	seq_44	E	-3.5	T-T	4.38745	1.2	-0.35	155.5	C2'-endo	10	0.54	not measured	40.4776	T
NFY	seq_44	D	-1.5	C-C	4.4687	1.3	1.49	70.2	C4'-exo	24	1.23	3.341	40.256	C
NFY	seq_44	E	0.5	T-T	4.20524	2.7	-1.97	69.5	C4'-exo	14	1.19	3.49222	45.1236	T
NFY	seq_44	E	3.5	T-C	5.02006	0.4	-0.95	153.2	C2'-endo	13	1.84	not measured	48.9792	C
NFY	seq_44	E	4.5	C-T	5.14979	0	1.11	148.9	C2'-endo	12	0.3	not measured	40.7853	T
NFY	seq_44	E	5.5	T-C	4.26613	1.9	-0.92	153.5	C2'-endo	9	0.71	not measured	40.1757	C
NFY	seq_44	E	6.5	C-T	4.50999	0.4	0.26	152.8	C2'-endo	5	-0.03	not measured	40.0234	T
NFY	seq_44	E	7.5	C-C	4.42176	0.3	0.16	151.1	C2'-endo	3	-0.05	not measured	38.2328	C
NFY	seq_44	E	8.5	C-C	4.34725	0.5	-0.02	149.6	C2'-endo	2	-0.2	not measured	37.6693	C
NFY	seq_44	E	9.5	C-C	4.59363	0.1	0.04	151.6	C2'-endo	6	-0.47	not measured	40.1484	C
NFY	seq_45	D	-8.5	C-C	4.63849	0.7	0.1	155.6	C2'-endo	7	0.18	not measured	39.7359	C
NFY	seq_45	D	-7.5	C-T	4.48273	0.7	-0.23	150.7	C2'-endo	6	0.13	not measured	42.0209	C
NFY	seq_45	D	-6.5	T-C	4.23257	1.7	0.85	148.3	C2'-endo	6	0.73	not measured	43.5278	T
NFY	seq_45	D	-5.5	C-C	4.37816	0.6	-0.21	155.5	C2'-endo	5	0.7	not measured	37.3554	C
NFY	seq_45	D	-4.5	C-C	5.18687	0	-0.45	151.1	C2'-endo	6	1.21	not measured	52.8213	C
NFY	seq_45	D	-1.5	C-C	4.45454	1.3	1.12	74	O4'-endo	22	1.08	3.31321	36.4391	C
NFY	seq_45	E	0.5	T-T	4.2207	2.6	-1.83	68.3	C4'-exo	14	1.21	3.44446	45.6694	T
NFY	seq_45	E	3.5	T-C	4.9198	0.5	-0.93	153.3	C2'-endo	12	1.84	not measured	48.3838	C
NFY	seq_45	E	4.5	C-T	5.32214	0	1.2	152.4	C2'-endo	13	0.53	not measured	43.4995	T
NFY	seq_45	E	5.5	T-C	4.22852	2	-1.03	153.3	C2'-endo	11	0.86	not measured	40.6695	C
NFY	seq_45	E	6.5	C-T	4.66513	0.3	0.31	158.5	C2'-endo	6	0.05	not measured	40.6998	T
NFY	seq_45	D	8.5	C-T	4.55595	0.6	-0.28	124.1	C1'-exo	8	-0.03	not measured	37.5379	C
NFY	seq_46	D	-8.5	C-T	4.7861	0.3	-0.38	23.6	C3'-endo	13	-0.42	not measured	30.7952	C
NFY	seq_46	D	-7.5	T-C	4.40825	1.5	0.63	157.5	C2'-endo	8	0.44	not measured	41.1567	T
NFY	seq_46	D	-6.5	C-C	4.84823	0	-0.5	154.2	C2'-endo	6	0.4	not measured	43.5909	C
NFY	seq_46	D	-5.5	C-C	4.49882	1.1	0.32	154	C2'-endo	7	0.91	not measured	43.644	C
NFY	seq_46	E	-3.5	C-T	4.57945	0.7	0.04	154.7	C2'-endo	10	0.51	not measured	41.2931	T
NFY	seq_46	D	-1.5	C-C	4.42737	1.2	1.32	66.8	C4'-exo	23	1.27	3.23563	40.0864	C
NFY	seq_46	E	0.5	T-T	4.19056	2.7	-1.82	68.7	C4'-exo	14	1.15	3.45827	44.9758	T
NFY	seq_46	E	3.5	T-C	5.25355	0	-0.75	150.7	C2'-endo	10	2.19	not measured	47.4581	C
NFY	seq_46	E	6.5	C-T	4.44169	0.6	0.22	146.6	C2'-endo	6	0.08	not measured	38.1696	T
NFY	seq_46	E	7.5	C-C	4.55215	0.2	0.25	153.9	C2'-endo	3	0.02	not measured	39.5132	C
NFY	seq_46	D	9.5	C-C	4.3836	1.3	0.3	59.6	C4'-exo	8	-0.35	not measured	36.8596	C
NFY	seq_47	D	-5.5	C-C	4.2113	1.8	0.57	140.6	C1'-exo	10	0.65	not measured	38.8101	C
NFY	seq_47	E	-3.5	C-T	4.52854	0.8	0	154.1	C2'-endo	9	0.46	not measured	41.1852	T
NFY	seq_47	D	-1.5	C-C	4.48851	1	1.32	67.5	C4'-exo	23	1.36	3.25454	39.836	C
NFY	seq_47	E	0.5	T-T	4.20252	2.6	-1.87	66.9	C4'-exo	14	1.33	3.43163	45.9906	T
NFY	seq_47	E	3.5	T-C	4.87391	0.8	-0.78	149.5	C2'-endo	12	1.59	not measured	42.3504	C
NFY	seq_47	E	4.5	T-T	4.39465	1.1	0.11	152.3	C2'-endo	7	0.01	not measured	39.1216	T
NFY	seq_47	E	5.5	T-T	4.44819	0.8	0.04	146.8	C2'-endo	7	0.11	not measured	41.7561	T
NFY	seq_47	E	6.5	C-T	4.85173	0.1	0.45	156.4	C2'-endo	9	-0.06	not measured	39.3747	T
NFY	seq_47	E	9.5	C-T	4.8032	0	0.53	158.1	C2'-endo	12	-0.68	not measured	30.4966	T
NFY	seq_48	E	-8.5	T-C	4.58757	1.2	-0.62	152.9	C2'-endo	13	1.11	not measured	45.2772	C
NFY	seq_48	E	-7.5	C-T	4.7347	0.2	0.78	145.1	C2'-endo	5	0.3	not measured	38.9061	T
NFY	seq_48	D	-5.5	C-C	4.40497	1.4	0.64	154.1	C2'-endo	9	1.19	not measured	45.6848	C
NFY	seq_48	E	-3.5	C-C	4.61131	0.6	-0.31	153.8	C2'-endo	8	0.63	not measured	42.4934	C
NFY	seq_48	D	-1.5	C-C	4.47732	1.3	1.11	75	O4'-endo	21	1.12	3.32851	37.5332	C
NFY	seq_48	E	0.5	T-T	4.17422	2.7	-1.93	66	C4'-exo	14	1.21	3.42071	45.4514	T
NFY	seq_48	E	3.5	T-C	5.33376	0	-0.64	150.8	C2'-endo	14	2.18	not measured	45.8096	C
NFY	seq_48	E	6.5	C-T	4.43551	0.6	0.31	149.1	C2'-endo	6	0	not measured	36.4778	T
NFY	seq_48	E	7.5	C-C	4.41372	0.6	-0.05	148.6	C2'-endo	4	0.05	not measured	40.6027	C
NFY	seq_49	E	-8.5	T-T	4.22916	1.8	-0.5	148.5	C2'-endo	10	0.32	not measured	42.6024	T
NFY	seq_49	D	-6.5	C-T	4.90243	0.1	-0.53	151.1	C2'-endo	9	0.34	not measured	45.5701	C
NFY	seq_49	D	-1.5	C-C	4.43646	1.2	1.27	76	O4'-endo	22	1.22	3.30356	38.4755	C
NFY	seq_49	E	0.5	T-T	4.14504	2.8	-1.84	68.3	C4'-exo	14	1.18	3.42071	44.9954	T
NFY	seq_49	E	3.5	T-C	4.94074	0.5	-0.92	151.9	C2'-endo	12	1.83	not measured	46.5076	C
NFY	seq_49	E	4.5	C-T	4.63949	0.5	0.61	149.6	C2'-endo	6	0.3	not measured	39.4918	T
NFY	seq_49	E	5.5	C-C	4.55265	0.8	-0.46	150.9	C2'-endo	7	0.75	not measured	45.8585	C
NFY	seq_49	E	6.5	C-C	4.54567	0.5	0.05	149.9	C2'-endo	7	0.36	not measured	38.3859	C
NFY	seq_49	E	9.5	T-T	4.50954	0.7	0.33	149.7	C2'-endo	8	0.28	not measured	37.7053	T
NFY	seq_5	D	-8.5	C-T	4.99129	0.4	-0.62	29.3	C3'-endo	17	-0.01	not measured	31.6468	C
NFY	seq_5	D	-5.5	C-C	4.25395	1.5	0.43	142.3	C1'-exo	9	0.67	not measured	38.5703	C
NFY	seq_5	E	-3.5	C-T	4.57796	0.7	0.07	156	C2'-endo	9	0.42	not measured	41.0589	T
NFY	seq_5	D	-1.5	C-C	4.50993	1	1.2	69.6	C4'-exo	23	1.3	3.27001	38.4461	C
NFY	seq_5	E	0.5	T-T	4.24168	2.4	-1.79	65.9	C4'-exo	14	1.29	3.42142	45.9027	T
NFY	seq_5	E	3.5	T-C	4.9875	0.4	-0.88	152.5	C2'-endo	13	1.81	not measured	48.4696	C
NFY	seq_5	E	4.5	C-T	5.0076	0	1.07	149.6	C2'-endo	9	0.3	not measured	38.8318	T
NFY	seq_5	E	5.5	T-C	4.39021	1.6	-0.92	152.5	C2'-endo	9	0.89	not measured	42.8421	C
NFY	seq_5	E	6.5	C-T	4.70809	0.3	0.4	156.3	C2'-endo	7	0.1	not measured	39.9646	T
NFY	seq_50	D	-8.5	T-T	4.45034	0.9	-0.05	152	C2'-endo	8	0.13	not measured	39.4875	T
NFY	seq_50	D	-7.5	T-T	4.37901	1	-0.03	144.9	C2'-endo	7	0.21	not measured	40.558	T
NFY	seq_50	D	-6.5	T-C	4.2039	2	0.97	144	C1'-exo	4	0.65	not measured	43.6621	T
NFY	seq_50	D	-5.5	C-C	4.35667	0.9	-0.15	150.1	C2'-endo	7	0.47	not measured	34.3092	C
NFY	seq_50	D	-2.5	T-C	4.1973	1.4	0.3	132	C1'-exo	10	0.39	not measured	35.7486	T
NFY	seq_50	D	-1.5	C-C	4.34514	1.6	1.2	91.1	O4'-endo	21	1.07	3.2528	37.9504	C
NFY	seq_50	E	0.5	T-T	4.20138	2.6	-1.72	64.4	C4'-exo	14	1.14	3.43238	44.666	T
NFY	seq_50	E	3.5	T-C	4.92363	0.6	-0.86	151.9	C2'-endo	13	1.72	not measured	47.5241	C
NFY	seq_50	E	4.5	C-T	4.8109	0.2	0.83	153.9	C2'-endo	9	0.18	not measured	36.0911	T
NFY	seq_50	E	5.5	T-C	4.41572	1.3	-0.77	138.2	C1'-exo	7	0.76	not measured	42.5715	C
NFY	seq_50	E	6.5	C-T	4.49783	0.5	0.32	151.6	C2'-endo	6	0.06	not measured	38.0214	T
NFY	seq_50	E	7.5	T-C	4.26545	0.7	-0.07	145.3	C2'-endo	3	0.02	not measured	38.9771	C
NFY	seq_50	E	8.5	T-T	4.21012	1.1	-0.2	142.4	C1'-exo	4	-0.11	not measured	38.768	T
NFY	seq_50	E	9.5	T-T	4.36386	0.9	0.14	142.6	C1'-exo	6	-0.01	not measured	40.6244	T
NFY	seq_51	D	-7.5	T-T	4.39162	1.1	0.04	144.7	C2'-endo	8	0.04	not measured	41.0593	T
NFY	seq_51	D	-6.5	T-C	4.41488	1.2	0.55	138.2	C1'-exo	4	0.57	not measured	44.5423	T
NFY	seq_51	D	-5.5	C-T	4.18087	1.3	-0.18	152.7	C2'-endo	7	0.21	not measured	34.0062	C
NFY	seq_51	E	-3.5	C-C	4.6331	0.7	-0.26	154.2	C2'-endo	11	0.71	not measured	40.2896	C
NFY	seq_51	D	-1.5	C-C	4.43811	1.4	1.2	73.4	O4'-endo	22	1.1	3.30056	38.4002	C
NFY	seq_51	E	0.5	T-T	4.22309	2.6	-1.85	66.9	C4'-exo	14	1.3	3.46368	46.0218	T
NFY	seq_51	E	3.5	T-C	5.09153	0.4	-0.59	134.5	C1'-exo	14	1.6	not measured	42.6272	C
NFY	seq_51	E	4.5	T-T	4.32643	1.4	0.06	151.5	C2'-endo	8	0.01	not measured	36.2544	T
NFY	seq_51	E	5.5	T-T	4.46973	0.9	-0.01	146	C2'-endo	8	0.11	not measured	41.6852	T
NFY	seq_51	E	6.5	C-T	4.59126	0.5	0.37	150.5	C2'-endo	9	-0.08	not measured	34.2142	T
NFY	seq_51	E	7.5	T-C	4.30528	1	-0.17	84.5	O4'-endo	4	-0.02	not measured	40.8383	C
NFY	seq_52	D	-8.5	C-C	4.55606	0.8	0.11	154.8	C2'-endo	6	0.16	not measured	38.5183	C
NFY	seq_52	D	-7.5	C-T	4.4842	0.7	-0.26	149.2	C2'-endo	7	0.21	not measured	41.9798	C
NFY	seq_52	D	-6.5	T-C	4.25122	1.7	0.86	147.8	C2'-endo	5	0.73	not measured	45.5656	T
NFY	seq_52	D	-5.5	C-C	4.30604	0.9	-0.19	152	C2'-endo	7	0.66	not measured	35.3844	C
NFY	seq_52	D	-4.5	C-C	5.14903	0	-0.49	154.3	C2'-endo	5	1.19	not measured	51.9842	C
NFY	seq_52	D	-1.5	C-C	4.41419	1.4	1.19	71.6	C4'-exo	22	1.1	3.29626	37.3584	C
NFY	seq_52	E	0.5	T-T	4.19918	2.7	-1.81	66.7	C4'-exo	14	1.21	3.44881	45.3239	T
NFY	seq_52	E	3.5	T-C	5.31803	0	-0.59	148.7	C2'-endo	12	2.13	not measured	46.3466	C
NFY	seq_52	E	4.5	T-T	4.38938	1.4	0.08	155.6	C2'-endo	10	0.14	not measured	36.8619	T
NFY	seq_52	E	7.5	C-C	4.29926	1	-0.2	150.9	C2'-endo	8	0.34	not measured	39.0038	C
NFY	seq_52	E	8.5	C-C	4.37093	0.4	0.17	149.2	C2'-endo	4	-0.18	not measured	36.7899	C
NFY	seq_53	E	-7.5	C-C	4.51474	0.3	0.34	149.6	C2'-endo	3	0.28	not measured	40.9679	C
NFY	seq_53	D	-5.5	C-C	4.22382	1.8	0.69	144.4	C2'-endo	6	0.67	not measured	42.7892	C
NFY	seq_53	D	-2.5	T-C	4.2163	1.3	0.44	150.3	C2'-endo	10	0.46	not measured	37.9789	T
NFY	seq_53	D	-1.5	C-C	4.32729	1.6	1.16	89.3	O4'-endo	20	1.04	3.26196	36.6861	C
NFY	seq_53	E	0.5	T-T	4.18805	2.7	-1.71	65.5	C4'-exo	13	1.14	3.44991	45.0112	T
NFY	seq_53	E	3.5	T-C	4.97295	0.4	-0.86	151.2	C2'-endo	13	1.71	not measured	47.0346	C
NFY	seq_53	E	4.5	C-T	4.78324	0.1	0.82	151.9	C2'-endo	7	0.12	not measured	36.4718	T
NFY	seq_53	E	5.5	T-C	4.3759	1.5	-0.87	148.6	C2'-endo	7	0.75	not measured	42.2361	C
NFY	seq_53	E	6.5	T-T	4.32145	1.1	-0.01	150.6	C2'-endo	7	0.19	not measured	40.8451	T
NFY	seq_53	E	7.5	C-T	4.51797	0.4	0.26	150.3	C2'-endo	5	-0.04	not measured	38.2927	T
NFY	seq_53	E	8.5	C-C	4.2699	0.6	-0.16	145.9	C2'-endo	4	-0.18	not measured	38.8753	C
NFY	seq_54	D	-8.5	C-T	4.87957	0.4	-0.58	19.6	C3'-endo	15	0.04	not measured	30.8993	C
NFY	seq_54	E	-6.5	C-C	4.57606	0.8	-0.13	152.5	C2'-endo	8	0.77	not measured	40.1509	C
NFY	seq_54	E	-3.5	T-C	4.76181	0.7	-0.41	158.1	C2'-endo	12	0.95	not measured	39.9034	C
NFY	seq_54	D	-1.5	C-C	4.43114	1.4	1.21	76.6	O4'-endo	22	1.16	3.29822	38.0687	C
NFY	seq_54	E	0.5	T-T	4.16546	2.8	-1.85	68	C4'-exo	14	1.19	3.44676	45.9335	T
NFY	seq_54	E	3.5	T-C	5.24751	0	-0.7	148.3	C2'-endo	13	2.02	not measured	45.2305	C
NFY	seq_54	E	6.5	C-T	4.48931	0.6	0.23	147.8	C2'-endo	6	0.08	not measured	38.6384	T
NFY	seq_54	E	7.5	C-C	4.36356	0.7	-0.14	146.3	C2'-endo	5	0.04	not measured	40.2446	C
NFY	seq_55	E	-7.5	C-C	4.64132	0.2	0.34	148.9	C2'-endo	3	0.34	not measured	42.6721	C
NFY	seq_55	D	-5.5	T-C	4.49641	1.4	0.96	152.8	C2'-endo	9	1.22	not measured	43.3082	T
NFY	seq_55	E	-3.5	T-T	4.53185	1	-0.32	150.4	C2'-endo	10	0.55	not measured	43.0706	T
NFY	seq_55	D	-1.5	C-C	4.48372	1	1.31	71.7	C4'-exo	23	1.33	3.28644	39.3566	C
NFY	seq_55	E	0.5	T-T	4.15062	2.7	-1.88	69.1	C4'-exo	15	1.19	3.39168	45.3724	T
NFY	seq_55	E	3.5	T-C	5.2803	0	-0.6	149.7	C2'-endo	12	2.04	not measured	45.8002	C
NFY	seq_55	E	6.5	C-T	4.43452	0.8	0.16	147.9	C2'-endo	7	0.05	not measured	37.7252	T
NFY	seq_55	E	7.5	C-C	4.34072	0.4	0.28	143.6	C1'-exo	7	-0.22	not measured	31.6954	C
NFY	seq_55	D	9.5	T-T	4.38762	1.4	0.27	137.4	C1'-exo	8	0.14	not measured	40.8153	T
NFY	seq_56	E	-8.5	C-C	4.43055	1.1	-0.48	148.1	C2'-endo	11	0.73	not measured	41.981	C
NFY	seq_56	E	-7.5	C-C	4.61621	0.1	0.56	149.5	C2'-endo	3	0.37	not measured	41.9167	C
NFY	seq_56	D	-5.5	C-C	4.24953	1.7	0.6	148.6	C2'-endo	10	0.84	not measured	42.2674	C
NFY	seq_56	D	-4.5	C-C	5.22343	0	-0.8	154.7	C2'-endo	4	1.2	not measured	50.2862	C
NFY	seq_56	D	-1.5	C-C	4.44212	1.3	1.19	70.3	C4'-exo	21	1.14	3.29544	37.2909	C
NFY	seq_56	E	0.5	T-T	4.17197	2.7	-1.87	66.4	C4'-exo	14	1.24	3.41717	45.61	T
NFY	seq_56	E	3.5	T-C	5.18356	0	-0.68	151	C2'-endo	11	2.05	not measured	46.1682	C
NFY	seq_56	E	6.5	C-T	4.51447	0.6	0.2	148.2	C2'-endo	6	0.12	not measured	38.0634	T
NFY	seq_57	D	-8.5	T-T	4.44986	0.8	-0.12	147.3	C2'-endo	6	0.14	not measured	38.3821	T
NFY	seq_57	D	-7.5	T-C	4.4017	1	0.64	149.1	C2'-endo	4	0.57	not measured	45.5044	T
NFY	seq_57	D	-6.5	C-T	4.53761	0.3	-0.57	138.9	C1'-exo	4	-0.1	not measured	37.5181	C
NFY	seq_57	D	-5.5	T-C	4.42845	1.5	0.93	156.7	C2'-endo	8	1.12	not measured	43.0456	T
NFY	seq_57	D	-2.5	C-C	4.26845	1.3	0.22	121.8	C1'-exo	11	0.48	not measured	35.2179	C
NFY	seq_57	D	-1.5	C-C	4.42749	1.2	1.29	75.3	O4'-endo	22	1.24	3.23105	39.7238	C
NFY	seq_57	E	0.5	T-T	4.21401	2.5	-1.75	65.4	C4'-exo	13	1.14	3.44611	45.1309	T
NFY	seq_57	E	3.5	T-C	4.95852	0.5	-0.89	151.9	C2'-endo	12	1.78	not measured	47.461	C
NFY	seq_57	E	4.5	C-T	4.89759	0.1	0.88	154.9	C2'-endo	9	0.17	not measured	38.9171	T
NFY	seq_57	E	5.5	T-C	4.41003	1.3	-0.75	148.9	C2'-endo	6	0.74	not measured	42.9803	C
NFY	seq_57	E	6.5	C-T	4.51956	0.4	0.29	152.4	C2'-endo	5	-0.04	not measured	38.5976	T
NFY	seq_57	E	7.5	C-C	4.38965	0.3	0.16	150	C2'-endo	3	-0.14	not measured	37.9249	C
NFY	seq_57	E	8.5	C-C	4.26114	0.8	-0.32	146.3	C2'-endo	4	-0.13	not measured	37.5418	C
NFY	seq_58	D	-7.5	T-T	4.33273	1.5	0.11	144.2	C2'-endo	10	0.18	not measured	36.0826	T
NFY	seq_58	E	-5.5	C-T	4.1534	1.5	0.11	151.3	C2'-endo	10	0.14	not measured	34.1664	T
NFY	seq_58	E	-4.5	C-C	4.32149	1	-0.57	148.1	C2'-endo	7	0.5	not measured	43.2804	C
NFY	seq_58	E	-3.5	T-C	4.4764	0.9	-0.66	150.7	C2'-endo	8	0.64	not measured	43.4194	C
NFY	seq_58	D	-1.5	C-C	4.44838	1.3	1.26	79.9	O4'-endo	21	1.23	3.33069	38.6019	C
NFY	seq_58	E	0.5	T-T	4.22241	2.6	-1.81	67.7	C4'-exo	14	1.28	3.44453	45.2894	T
NFY	seq_58	E	3.5	T-C	4.78931	1.1	-0.76	149.4	C2'-endo	12	1.41	not measured	41.542	C
NFY	seq_58	E	4.5	T-T	4.40445	1	0.16	149.1	C2'-endo	7	-0.03	not measured	38.4864	T
NFY	seq_58	E	5.5	T-T	4.4543	0.8	0.06	146.8	C2'-endo	8	0.06	not measured	41.4195	T
NFY	seq_58	E	6.5	C-T	4.75873	0.2	0.36	153.5	C2'-endo	8	-0.04	not measured	40.4298	T
NFY	seq_58	E	9.5	T-T	4.46007	0.5	0.4	149.9	C2'-endo	7	0.09	not measured	40.395	T
NFY	seq_59	E	-6.5	C-C	4.28444	1.1	-0.3	143.3	C1'-exo	3	0.19	not measured	44.7179	C
NFY	seq_59	D	-2.5	C-C	4.2802	1	-0.03	149.8	C2'-endo	8	0.29	not measured	34.4586	C
NFY	seq_59	D	-1.5	C-C	4.43986	1.3	1.36	81.3	O4'-endo	21	1.23	3.27707	41.1824	C
NFY	seq_59	E	0.5	T-T	4.1565	2.7	-1.79	66.4	C4'-exo	14	1.14	3.41498	44.8056	T
NFY	seq_59	E	3.5	T-C	5.05205	0.2	-0.93	150.7	C2'-endo	12	1.97	not measured	45.7743	C
NFY	seq_59	E	4.5	C-T	4.55508	0.7	0.46	157	C2'-endo	7	0.14	not measured	37.5224	T
NFY	seq_59	E	7.5	C-C	4.3709	0.4	0.2	152	C2'-endo	6	0.02	not measured	35.7179	C
NFY	seq_59	D	9.5	C-C	4.46744	1	0.17	92.2	O4'-endo	8	-0.15	not measured	39.1195	C
NFY	seq_6	D	-8.5	C-T	5.04827	0.2	-0.8	27	C3'-endo	14	0.01	not measured	29.9843	C
NFY	seq_6	D	-5.5	C-T	4.31306	1.1	-0.19	157.7	C2'-endo	7	0.25	not measured	37.9117	C
NFY	seq_6	E	-3.5	C-C	4.49512	1.1	-0.42	156.3	C2'-endo	13	0.75	not measured	38.3055	C
NFY	seq_6	D	-1.5	C-C	4.44637	1.2	1.2	70.8	C4'-exo	22	1.2	3.25548	38.5844	C
NFY	seq_6	E	0.5	T-T	4.13252	2.9	-1.83	65.8	C4'-exo	13	1.28	3.46227	45.3625	T
NFY	seq_6	D	2.5	T-C	5.04514	0.3	0.84	113.4	C1'-exo	14	1.84	not measured	45.9599	T
NFY	seq_6	E	6.5	C-T	4.38309	0.8	0.19	145.4	C2'-endo	6	0.04	not measured	37.6768	T
NFY	seq_6	E	7.5	T-C	4.27852	0.9	-0.16	147.9	C2'-endo	5	0.18	not measured	39.9898	C
NFY	seq_6	E	8.5	C-T	4.4538	0.4	0.35	145.2	C2'-endo	4	-0.32	not measured	37.0385	T
NFY	seq_60	E	-8.5	T-C	4.5188	1.2	-0.62	149.4	C2'-endo	11	0.89	not measured	41.4533	C
NFY	seq_60	E	-7.5	T-T	4.43714	1	0.13	145.6	C2'-endo	7	0.13	not measured	41.1787	T
NFY	seq_60	E	-6.5	C-T	4.48135	0.9	0.13	147.4	C2'-endo	5	-0.14	not measured	40.7326	T
NFY	seq_60	D	-4.5	C-T	4.98408	0.1	-0.8	152.8	C2'-endo	10	0.67	not measured	41.5282	C
NFY	seq_60	D	-1.5	C-C	4.49169	1.2	1.1	67.5	C4'-exo	21	1.11	3.34937	37.1782	C
NFY	seq_60	E	0.5	T-T	4.2043	2.6	-1.74	69.4	C4'-exo	14	1.22	3.43215	44.3199	T
NFY	seq_60	E	3.5	T-C	5.00948	0.4	-0.94	153.1	C2'-endo	14	1.92	not measured	49.7064	C
NFY	seq_60	E	4.5	C-T	5.24017	0	1.15	150	C2'-endo	13	0.49	not measured	41.84	T
NFY	seq_60	E	5.5	T-C	4.28895	1.9	-0.92	153.8	C2'-endo	9	0.79	not measured	41.2443	C
NFY	seq_60	E	6.5	C-T	4.5077	0.5	0.27	152.8	C2'-endo	5	0.03	not measured	40.2706	T
NFY	seq_60	E	7.5	T-C	4.31713	0.8	-0.15	148.1	C2'-endo	4	0.13	not measured	40.7568	C
NFY	seq_60	E	8.5	C-T	4.46963	0.5	0.26	147.2	C2'-endo	4	-0.27	not measured	37.6401	T
NFY	seq_7	D	-7.5	T-C	4.2914	1.1	0.41	141.2	C1'-exo	5	0.22	not measured	41.5939	T
NFY	seq_7	D	-6.5	C-T	4.60291	0.3	-0.54	139.4	C1'-exo	3	-0.01	not measured	39.1807	C
NFY	seq_7	D	-5.5	T-C	4.3987	1.6	1.06	156.5	C2'-endo	10	1.3	not measured	44.5974	T
NFY	seq_7	E	-3.5	C-T	4.53142	0.8	-0.08	154.1	C2'-endo	9	0.55	not measured	42.6119	T
NFY	seq_7	D	-1.5	C-C	4.44412	1.1	1.25	68.4	C4'-exo	23	1.26	3.21456	38.9172	C
NFY	seq_7	E	0.5	T-T	4.17271	2.8	-1.83	68.2	C4'-exo	13	1.24	3.49215	44.8944	T
NFY	seq_7	D	2.5	T-C	4.70008	0.8	1.16	127.3	C1'-exo	15	1.66	not measured	44.3504	T
NFY	seq_7	E	4.5	C-C	5.09015	0	0.95	156	C2'-endo	6	0.9	not measured	41.3972	C
NFY	seq_7	E	5.5	T-C	4.31265	1.8	-1.29	153.2	C2'-endo	14	1.09	not measured	40.8504	C
NFY	seq_7	E	6.5	C-T	4.59691	0.5	0.27	156.6	C2'-endo	7	0.3	not measured	41.1876	T
NFY	seq_7	D	8.5	C-T	4.54261	0.7	-0.23	132.2	C1'-exo	9	0.11	not measured	39.5915	C
NFY	seq_8	D	-6.5	T-C	4.76175	0.6	0.97	154.1	C2'-endo	10	1.66	not measured	44.9186	T
NFY	seq_8	D	-5.5	C-C	4.80883	0	-0.56	153.7	C2'-endo	4	0.9	not measured	44.9651	C
NFY	seq_8	E	-3.5	C-C	4.63529	0.5	-0.31	153.3	C2'-endo	6	0.69	not measured	43.5011	C
NFY	seq_8	D	-1.5	C-C	4.46797	1.2	1.23	75.2	O4'-endo	22	1.22	3.28735	39.2663	C
NFY	seq_8	E	0.5	T-T	4.19684	2.9	-1.87	63.7	C4'-exo	12	1.2	3.53827	45.4588	T
NFY	seq_8	D	2.5	T-C	4.81801	0.7	1.12	129.3	C1'-exo	14	1.7	not measured	44.2496	T
NFY	seq_8	E	4.5	C-C	5.0918	0	0.83	155.8	C2'-endo	7	0.87	not measured	41.9538	C
NFY	seq_8	E	5.5	T-C	4.35241	1.8	-1.14	154.2	C2'-endo	12	1.03	not measured	41.1346	C
NFY	seq_8	E	6.5	C-T	4.4987	0.6	0.2	152.9	C2'-endo	6	0.15	not measured	41.0341	T
NFY	seq_8	E	7.5	C-C	4.44628	0.3	0.19	150.3	C2'-endo	5	0.13	not measured	38.0126	C
NFY	seq_8	E	8.5	C-C	4.32585	0.7	-0.25	150.3	C2'-endo	3	0.04	not measured	40.9645	C
NFY	seq_9	D	-7.5	C-C	4.43261	1.3	0.61	159.3	C2'-endo	8	0.64	not measured	41.7316	C
NFY	seq_9	D	-6.5	C-C	5.09977	0	-0.4	157.8	C2'-endo	7	1.21	not measured	47.5605	C
NFY	seq_9	E	-4.5	C-T	4.23074	1.7	-0.84	154	C2'-endo	11	0.8	not measured	43.9863	T
NFY	seq_9	E	-3.5	C-C	4.64629	0.4	-0.2	160.5	C2'-endo	7	0.58	not measured	44.2481	C
NFY	seq_9	D	-1.5	C-C	4.49729	1.2	1.24	75.4	O4'-endo	21	1.23	3.33449	39.2556	C
NFY	seq_9	E	0.5	T-T	4.18934	2.7	-1.84	65.3	C4'-exo	12	1.32	3.494	46.2178	T
NFY	seq_9	D	2.5	T-C	4.81346	0.4	0.97	127	C1'-exo	13	1.72	not measured	44.8083	T
NFY	seq_9	E	4.5	T-T	4.27242	1.2	0.05	156.7	C2'-endo	7	0.05	not measured	37.0383	T
NFY	seq_9	E	5.5	T-T	4.45234	0.8	-0.04	152.4	C2'-endo	6	0.13	not measured	42.8532	T
NFY	seq_9	E	6.5	C-T	4.65809	0.2	0.35	152.3	C2'-endo	7	-0.01	not measured	39.8468	T
NFY	seq_9	E	7.5	C-C	4.32087	0.4	0.17	142.2	C1'-exo	5	-0.2	not measured	35.3645	C
NFY	seq_9	E	8.5	T-C	4.04605	1.6	-0.78	145.3	C2'-endo	5	0.15	not measured	42.3315	C
NFY	seq_9	E	9.5	T-T	4.27113	1	0.12	147.6	C2'-endo	5	0.06	not measured	40.4823	T
[truncated: 194 more rows]

## Sheet: 4_Unbound_DNA_measurements
TF	run_name	chain	position	step	d22_distance	ring_stacking_overlap_area	bp_shift	pseudorotation_angle	sugar_pucker	interbase_angle	bp_slide	d64_distance	interbase_dihedral_angle	pyrimidine_marker
AP1	seq_1	B	-5.5	C-T	4.32444	0.5	0.04	144.8	C2'-endo	3	-0.49	not measured	36.3952	T
AP1	seq_1	B	-4.5	T-C	4.23675	0.4	-0.09	148.3	C2'-endo	2	-0.43	not measured	36.7711	C
AP1	seq_1	B	-1.5	T-C	4.08261	0.8	-0.3	145.7	C2'-endo	5	-0.38	not measured	34.8806	C
AP1	seq_1	B	-0.5	C-T	4.33616	0.2	0.19	145	C2'-endo	5	-0.74	not measured	33.0368	T
AP1	seq_1	A	1.5	T-C	4.11456	0.5	0.14	140.2	C1'-exo	5	-0.5	not measured	34.0136	T
AP1	seq_1	B	5.5	T-C	4.0709	0.8	-0.38	148.3	C2'-endo	5	-0.24	not measured	37.6272	C
AP1	seq_1	B	6.5	C-T	4.4024	0.2	0.21	150.5	C2'-endo	3	-0.5	not measured	36.5617	T
AP1	seq_1	B	7.5	T-C	4.15664	0.7	-0.26	148.8	C2'-endo	4	-0.2	not measured	38.069	C
AP1	seq_10	B	-5.5	C-T	4.36408	0.4	-0.12	137.8	C1'-exo	5	-0.7	not measured	36.9998	T
AP1	seq_10	B	-4.5	T-C	4.28977	0.2	-0.01	141.4	C1'-exo	1	-0.71	not measured	34.8507	C
AP1	seq_10	B	-1.5	T-C	4.11215	0.5	-0.26	137.1	C1'-exo	4	-0.74	not measured	32.388	C
AP1	seq_10	B	-0.5	C-T	4.31503	0.1	0.18	137.6	C1'-exo	4	-1.11	not measured	30.3698	T
AP1	seq_10	A	1.5	T-C	4.19143	0.3	0.11	136.7	C1'-exo	3	-0.77	not measured	32.2936	T
AP1	seq_10	A	4.5	C-T	4.51894	0.1	-0.31	135.2	C1'-exo	4	-1.01	not measured	33.847	C
AP1	seq_10	A	5.5	T-C	4.15972	0.6	0.21	143.3	C1'-exo	3	-0.53	not measured	35.6593	T
AP1	seq_10	A	6.5	C-C	4.16405	0.5	0.22	142.7	C1'-exo	2	-0.68	not measured	35.7288	C
AP1	seq_10	A	7.5	C-C	4.36764	0.1	-0.11	140.9	C1'-exo	1	-0.89	not measured	33.757	C
AP1	seq_11	B	-7.5	C-C	4.31752	0	0.18	144.5	C2'-endo	3	-1.07	not measured	33.5349	C
AP1	seq_11	B	-6.5	T-C	4.17185	0.8	-0.41	147.2	C2'-endo	4	-0.41	not measured	38.7972	C
AP1	seq_11	B	-5.5	C-T	4.40271	0.4	0.1	145.3	C2'-endo	5	-0.64	not measured	36.1669	T
AP1	seq_11	B	-4.5	T-C	4.26447	0.3	-0.04	143.8	C1'-exo	3	-0.63	not measured	35.3539	C
AP1	seq_11	B	-1.5	T-C	4.24296	0.4	-0.14	145	C2'-endo	2	-0.62	not measured	36.0587	C
AP1	seq_11	A	0.5	C-T	4.39862	0.1	-0.18	138.8	C1'-exo	3	-1.12	not measured	31.9249	C
AP1	seq_11	A	1.5	T-C	4.13469	0.5	0.3	140	C1'-exo	3	-0.63	not measured	34.8602	T
AP1	seq_11	A	4.5	C-C	4.33694	0	-0.3	140.2	C1'-exo	4	-1.44	not measured	26.855	C
AP1	seq_11	A	5.5	C-T	4.53393	0.1	-0.34	135.3	C1'-exo	5	-0.94	not measured	31.2761	C
AP1	seq_11	A	6.5	T-C	4.11127	0.7	0.38	144.6	C2'-endo	4	-0.64	not measured	36.4044	T
AP1	seq_11	A	7.5	C-C	4.28609	0	-0.12	143.7	C1'-exo	4	-1.37	not measured	30.832	C
AP1	seq_12	A	-7.5	T-T	4.35289	0.8	0.22	143.2	C1'-exo	6	-0.12	not measured	37.9379	T
AP1	seq_12	B	-5.5	C-C	4.50974	0.1	0.02	151.6	C2'-endo	2	-0.5	not measured	36.7348	C
AP1	seq_12	B	-4.5	C-C	4.38304	0	0.15	145.1	C2'-endo	2	-1.16	not measured	32.229	C
AP1	seq_12	B	-1.5	T-C	4.26262	0.5	-0.29	150.2	C2'-endo	3	-0.29	not measured	37.9178	C
AP1	seq_12	B	-0.5	C-T	4.44984	0	0.32	143.4	C1'-exo	2	-1.2	not measured	30.5565	T
AP1	seq_12	A	1.5	T-C	4.23841	0.4	0.16	142.4	C1'-exo	2	-0.55	not measured	36.0272	T
AP1	seq_12	A	4.5	C-T	4.38167	0.2	-0.2	136	C1'-exo	3	-1	not measured	32.572	C
AP1	seq_12	A	5.5	T-C	4.30098	0.6	0.3	141.9	C1'-exo	3	-0.16	not measured	38.7039	T
AP1	seq_13	B	-5.5	C-C	4.4067	0.3	-0.14	156.2	C2'-endo	3	-0.07	not measured	43.2561	C
AP1	seq_13	B	-4.5	C-C	4.39689	0	0.22	153.5	C2'-endo	1	-0.57	not measured	37.2679	C
AP1	seq_13	B	-1.5	T-C	4.28633	0.5	-0.18	153.9	C2'-endo	4	-0.06	not measured	40.2907	C
AP1	seq_13	B	-0.5	C-T	4.44485	0.1	0.35	148.7	C2'-endo	2	-0.85	not measured	34.0811	T
AP1	seq_13	A	1.5	T-C	4.23514	0.3	0.09	144.3	C2'-endo	2	-0.45	not measured	36.0494	T
AP1	seq_13	B	5.5	C-T	4.42892	0.2	0.16	144.5	C2'-endo	4	-0.85	not measured	35.0195	T
AP1	seq_13	B	6.5	C-C	4.25727	0.2	0	145.8	C2'-endo	0	-0.74	not measured	36.3105	C
AP1	seq_14	B	-7.5	T-C	4.2496	0.3	-0.1	146.6	C2'-endo	3	-0.65	not measured	33.8557	C
AP1	seq_14	B	-6.5	C-T	4.30913	0.3	-0.06	139.2	C1'-exo	4	-0.83	not measured	33.5562	T
AP1	seq_14	B	-5.5	C-C	4.17416	0.1	0.02	141.7	C1'-exo	6	-0.88	not measured	31.3657	C
AP1	seq_14	B	-4.5	C-C	4.26188	0	0.19	146.2	C2'-endo	4	-0.97	not measured	30.2985	C
AP1	seq_14	B	-1.5	T-C	4.16781	0.4	-0.17	147.3	C2'-endo	4	-0.52	not measured	34.5244	C
AP1	seq_14	B	-0.5	C-T	4.36436	0.1	0.17	142.7	C1'-exo	3	-1.06	not measured	31.7873	T
AP1	seq_14	A	1.5	T-C	4.20025	0.3	0.05	143.4	C1'-exo	2	-0.66	not measured	35.0388	T
AP1	seq_14	A	6.5	C-C	4.40053	0.1	-0.08	146.9	C2'-endo	1	-0.7	not measured	37.368	C
AP1	seq_15	A	-7.5	T-T	4.29711	0.7	0.27	151	C2'-endo	6	-0.47	not measured	39.4499	T
AP1	seq_15	A	-4.5	T-C	4.25767	0.2	0.12	149.8	C2'-endo	1	-0.61	not measured	38.0799	T
AP1	seq_15	A	-3.5	C-T	4.39585	0.1	-0.06	153.5	C2'-endo	2	-0.92	not measured	34.7453	C
AP1	seq_15	B	-1.5	T-C	4.30636	0.1	0.02	155.4	C2'-endo	2	-0.67	not measured	36.46	C
AP1	seq_15	A	0.5	C-T	4.56607	0	-0.29	150.4	C2'-endo	4	-1.21	not measured	33.9099	C
AP1	seq_15	A	1.5	T-C	4.28411	0.2	0.07	150.7	C2'-endo	1	-0.59	not measured	36.958	T
AP1	seq_15	A	4.5	T-C	4.28286	0.2	0.16	149.1	C2'-endo	1	-0.49	not measured	39.1218	T
AP1	seq_15	A	5.5	C-C	4.34089	0.1	0.02	153.4	C2'-endo	2	-0.63	not measured	38.0001	C
AP1	seq_15	A	6.5	C-C	4.65766	0	-0.1	152.8	C2'-endo	8	-0.48	not measured	43.2112	C
AP1	seq_15	A	7.5	C-C	4.59562	0	-0.12	158.8	C2'-endo	7	-0.55	not measured	42.1469	C
AP1	seq_16	B	-7.5	C-C	4.39984	0.1	0.06	155	C2'-endo	1	-0.39	not measured	38.565	C
AP1	seq_16	A	-5.5	C-C	4.36668	0.2	0.06	155.4	C2'-endo	3	-0.5	not measured	39.3515	C
AP1	seq_16	B	-1.5	T-C	4.29924	0.2	0.05	151.6	C2'-endo	1	-0.59	not measured	35.4073	C
AP1	seq_16	A	0.5	C-T	4.49024	0	-0.3	144.2	C2'-endo	2	-1.17	not measured	33.7449	C
AP1	seq_16	A	1.5	T-C	4.31834	0.2	-0.02	147.4	C2'-endo	2	-0.46	not measured	35.9909	T
AP1	seq_16	A	4.5	C-C	4.29524	0	-0.21	144.8	C2'-endo	3	-1.19	not measured	28.6954	C
AP1	seq_16	A	5.5	C-C	4.37544	0	-0.1	145.4	C2'-endo	1	-1.08	not measured	32.8774	C
AP1	seq_16	A	6.5	C-C	4.49082	0	-0.25	148.3	C2'-endo	2	-1.02	not measured	34.355	C
AP1	seq_16	A	7.5	C-C	4.42197	0	-0.21	153.9	C2'-endo	2	-0.89	not measured	35.1633	C
AP1	seq_17	A	-7.5	T-C	4.08825	0.7	0.37	155.6	C2'-endo	5	-0.26	not measured	37.4491	T
AP1	seq_17	A	-6.5	C-C	4.24257	0.3	0.18	158.4	C2'-endo	1	-0.5	not measured	36.5519	C
AP1	seq_17	A	-5.5	C-C	4.50962	0	-0.08	156.4	C2'-endo	5	-0.7	not measured	37.8923	C
AP1	seq_17	B	-1.5	T-C	4.25534	0.2	-0.02	159.4	C2'-endo	3	-0.49	not measured	34.7651	C
AP1	seq_17	A	0.5	C-T	4.39525	0.1	-0.21	155.7	C2'-endo	1	-0.95	not measured	34.1518	C
AP1	seq_17	A	1.5	T-C	4.2244	0.2	0.03	157.1	C2'-endo	4	-0.45	not measured	35.5589	T
AP1	seq_17	A	4.5	T-C	4.35986	0.3	0.13	153.8	C2'-endo	2	-0.31	not measured	39.0558	T
AP1	seq_17	A	5.5	C-C	4.42731	0.2	0.02	160.8	C2'-endo	3	-0.39	not measured	39.3903	C
AP1	seq_17	A	6.5	C-C	4.63196	0	-0.26	162.2	C2'-endo	6	-0.36	not measured	39.9715	C
AP1	seq_17	A	7.5	C-C	4.54994	0	-0.11	166.4	C2'-endo	4	-0.24	not measured	41.6213	C
AP1	seq_18	A	-7.5	C-T	4.60739	0	-0.26	154.8	C2'-endo	6	-0.88	not measured	36.3169	C
AP1	seq_18	A	-6.5	T-C	4.21854	0.4	0.18	150.2	C2'-endo	2	-0.52	not measured	37.1643	T
AP1	seq_18	A	-5.5	C-T	4.4045	0.2	-0.04	150.3	C2'-endo	4	-0.84	not measured	36.3495	C
AP1	seq_18	A	-4.5	T-C	4.19182	0.3	0.21	147.9	C2'-endo	1	-0.67	not measured	37.1259	T
AP1	seq_18	A	-3.5	C-T	4.47	0.1	-0.08	148.8	C2'-endo	4	-1.08	not measured	35.1188	C
AP1	seq_18	B	-1.5	T-C	4.23459	0.2	-0.12	150.8	C2'-endo	3	-0.67	not measured	35.3677	C
AP1	seq_18	B	-0.5	C-T	4.44529	0	0.21	147.8	C2'-endo	2	-1.11	not measured	33.5332	T
AP1	seq_18	A	1.5	T-C	4.31465	0.1	0.02	147.9	C2'-endo	1	-0.67	not measured	36.1451	T
AP1	seq_18	A	4.5	C-T	4.51748	0.1	-0.18	149.5	C2'-endo	6	-0.97	not measured	35.8092	C
AP1	seq_18	A	5.5	T-C	4.29295	0.3	0.15	149.6	C2'-endo	1	-0.48	not measured	39.371	T
AP1	seq_18	A	6.5	C-C	4.39527	0.1	-0.08	153.2	C2'-endo	3	-0.66	not measured	38.936	C
AP1	seq_18	A	7.5	C-C	4.44857	0	-0.11	155.1	C2'-endo	3	-0.7	not measured	38.2356	C
AP1	seq_19	A	-5.5	T-T	4.28289	0.6	0.25	155.8	C2'-endo	4	-0.47	not measured	38.8735	T
AP1	seq_19	A	-4.5	T-C	4.22583	0.3	0.2	156.3	C2'-endo	2	-0.33	not measured	40.0429	T
AP1	seq_19	A	-3.5	C-T	4.49845	0.1	-0.09	161.6	C2'-endo	4	-0.67	not measured	38.4872	C
AP1	seq_19	B	-1.5	T-C	4.35499	0.1	-0.01	161.7	C2'-endo	2	-0.41	not measured	38.3112	C
AP1	seq_19	B	-0.5	C-T	4.53078	0	0.18	157.6	C2'-endo	4	-0.99	not measured	35.8606	T
AP1	seq_19	A	1.5	T-C	4.38768	0.2	0.1	157.5	C2'-endo	2	-0.48	not measured	40.0511	T
AP1	seq_19	A	4.5	T-T	4.32551	0.6	0.27	155.5	C2'-endo	5	-0.36	not measured	41.4857	T
AP1	seq_19	A	5.5	T-C	4.19518	0.5	0.32	156.2	C2'-endo	0	-0.3	not measured	41.3193	T
AP1	seq_19	A	6.5	C-C	4.46674	0	-0.11	159.4	C2'-endo	4	-0.48	not measured	40.0944	C
AP1	seq_19	A	7.5	C-C	4.50239	0	-0.16	164.4	C2'-endo	3	-0.44	not measured	39.6758	C
AP1	seq_2	B	-7.5	T-C	4.2716	0.3	-0.16	153.9	C2'-endo	1	-0.59	not measured	36.4028	C
AP1	seq_2	B	-6.5	C-T	4.53454	0.1	0.21	150.8	C2'-endo	4	-0.87	not measured	34.4014	T
AP1	seq_2	B	-5.5	C-C	4.44837	0	0.27	154.6	C2'-endo	2	-0.93	not measured	33.7782	C
AP1	seq_2	B	-4.5	C-C	4.36484	0	0.19	153.4	C2'-endo	1	-1.03	not measured	33.1759	C
AP1	seq_2	B	-1.5	T-C	4.29464	0.2	-0.04	155.6	C2'-endo	1	-0.53	not measured	37.0595	C
AP1	seq_2	B	-0.5	C-T	4.56543	0	0.33	152.2	C2'-endo	4	-1.15	not measured	34.5369	T
AP1	seq_2	A	1.5	T-C	4.32656	0.1	-0.01	151.1	C2'-endo	1	-0.64	not measured	36.9126	T
AP1	seq_2	A	4.5	C-C	4.40993	0	-0.17	151.6	C2'-endo	2	-0.92	not measured	35.2626	C
AP1	seq_2	B	6.5	C-T	4.51088	0.1	0.12	149.7	C2'-endo	5	-0.71	not measured	36.6714	T
AP1	seq_20	B	-7.5	C-C	4.54342	0	0.41	160.6	C2'-endo	3	-0.68	not measured	37.1648	C
AP1	seq_20	B	-6.5	T-C	4.23221	0.5	-0.27	156.1	C2'-endo	1	-0.36	not measured	39.7887	C
AP1	seq_20	B	-5.5	T-T	4.23573	0.7	-0.21	149	C2'-endo	4	-0.4	not measured	37.8259	T
AP1	seq_20	B	-4.5	T-T	4.3046	0.5	-0.11	148.8	C2'-endo	5	-0.57	not measured	38.0034	T
AP1	seq_20	B	-1.5	T-C	4.28299	0.2	-0.09	152.4	C2'-endo	0	-0.76	not measured	35.1147	C
AP1	seq_20	A	0.5	C-T	4.40809	0	-0.22	147.7	C2'-endo	2	-1.15	not measured	31.9827	C
AP1	seq_20	A	1.5	T-C	4.24159	0.3	0.12	148.6	C2'-endo	1	-0.52	not measured	37.0852	T
AP1	seq_20	A	4.5	C-T	4.48219	0.1	-0.27	149.5	C2'-endo	4	-0.88	not measured	33.7194	C
AP1	seq_20	A	5.5	T-C	4.22176	0.4	0.2	149.9	C2'-endo	2	-0.39	not measured	37.5492	T
AP1	seq_20	A	6.5	C-C	4.40418	0.1	-0.06	153.2	C2'-endo	3	-0.61	not measured	38.3317	C
AP1	seq_20	A	7.5	C-C	4.57361	0	-0.23	157.5	C2'-endo	5	-0.62	not measured	39.5949	C
AP1	seq_21	B	-7.5	C-C	4.47042	0	0.13	158.3	C2'-endo	1	-0.34	not measured	38.8951	C
AP1	seq_21	B	-6.5	C-C	4.4841	0	0.16	159	C2'-endo	1	-0.48	not measured	39.1315	C
AP1	seq_21	B	-5.5	C-C	4.36007	0.1	-0.06	155.5	C2'-endo	0	-0.41	not measured	39.5208	C
AP1	seq_21	B	-4.5	T-C	4.16112	0.5	-0.35	151.6	C2'-endo	4	-0.34	not measured	37.9548	C
AP1	seq_21	B	-1.5	T-C	4.19477	0.3	-0.16	154.1	C2'-endo	4	-0.42	not measured	36.9662	C
AP1	seq_21	B	-0.5	C-T	4.33353	0.2	0.02	148.9	C2'-endo	2	-0.89	not measured	35.1791	T
AP1	seq_21	A	1.5	T-C	4.20223	0.3	0.13	149.4	C2'-endo	3	-0.46	not measured	38.2803	T
AP1	seq_21	B	5.5	C-C	4.46487	0	0.05	158.3	C2'-endo	3	-0.5	not measured	40.5579	C
AP1	seq_22	B	-7.5	T-T	4.27643	0.9	-0.28	147.1	C2'-endo	6	-0.22	not measured	39.5465	T
AP1	seq_22	B	-6.5	C-T	4.42856	0.3	0.06	148.3	C2'-endo	5	-0.51	not measured	38.5548	T
AP1	seq_22	B	-5.5	C-C	4.35206	0.1	0.07	154	C2'-endo	1	-0.38	not measured	40.1163	C
AP1	seq_22	B	-4.5	T-C	4.28568	0.4	-0.13	152.9	C2'-endo	4	-0.3	not measured	39.6029	C
AP1	seq_22	B	-1.5	T-C	4.31348	0.3	-0.02	150.3	C2'-endo	3	-0.45	not measured	36.4168	C
AP1	seq_22	B	-0.5	C-T	4.42865	0.1	0.23	144.7	C2'-endo	3	-1.06	not measured	31.8641	T
AP1	seq_22	A	1.5	T-C	4.26457	0.3	0.08	143.8	C1'-exo	2	-0.61	not measured	34.9541	T
AP1	seq_22	A	4.5	T-T	4.27975	0.7	0.13	134.2	C1'-exo	5	-0.5	not measured	37.0439	T
AP1	seq_22	A	5.5	T-T	4.26396	0.8	0.12	142.6	C1'-exo	4	-0.36	not measured	38.0947	T
AP1	seq_22	A	6.5	T-C	4.17861	0.9	0.39	145.7	C2'-endo	3	-0.13	not measured	39.5481	T
AP1	seq_22	A	7.5	C-C	4.51438	0.1	-0.19	148.4	C2'-endo	4	-0.27	not measured	38.9628	C
AP1	seq_23	B	-7.5	T-T	4.30798	0.3	-0.1	145.4	C2'-endo	4	-0.84	not measured	34.7005	T
AP1	seq_23	B	-6.5	C-T	4.3967	0.1	0.13	142	C1'-exo	3	-1.01	not measured	33.2891	T
AP1	seq_23	B	-5.5	C-C	4.38329	0	0.16	151	C2'-endo	1	-0.86	not measured	35.7234	C
AP1	seq_23	A	-3.5	C-T	4.43586	0.1	-0.06	152.5	C2'-endo	5	-1.05	not measured	36.5272	C
AP1	seq_23	B	-1.5	T-C	4.2459	0.1	-0.09	150.6	C2'-endo	2	-0.72	not measured	35.3875	C
AP1	seq_23	B	-0.5	C-T	4.47209	0	0.2	147.6	C2'-endo	3	-1.16	not measured	33.2647	T
AP1	seq_23	A	1.5	T-C	4.30773	0.1	0.05	147.4	C2'-endo	0	-0.7	not measured	37.052	T
AP1	seq_23	A	4.5	C-C	4.45009	0	-0.2	149.7	C2'-endo	1	-1.04	not measured	34.2449	C
AP1	seq_23	B	6.5	C-T	4.42635	0.1	0.01	144.5	C2'-endo	4	-0.87	not measured	35.0864	T
AP1	seq_23	B	7.5	T-C	4.21425	0.2	-0.22	149.3	C2'-endo	1	-0.6	not measured	37.8682	C
AP1	seq_24	A	-7.5	C-T	4.36723	0.4	0	150.5	C2'-endo	5	-0.51	not measured	36.5169	C
AP1	seq_24	B	-5.5	C-C	4.41087	0.1	0.08	155.4	C2'-endo	1	-0.52	not measured	38.4893	C
AP1	seq_24	B	-4.5	T-C	4.21933	0.4	-0.13	149.3	C2'-endo	2	-0.6	not measured	35.5421	C
AP1	seq_24	B	-1.5	T-C	4.26575	0.2	-0.05	150.8	C2'-endo	2	-0.54	not measured	35.3222	C
AP1	seq_24	B	-0.5	C-T	4.48243	0	0.28	148.3	C2'-endo	2	-1.17	not measured	33.6743	T
AP1	seq_24	A	1.5	T-C	4.32714	0.2	0.02	147.5	C2'-endo	1	-0.63	not measured	36.41	T
AP1	seq_24	A	4.5	C-T	4.48487	0.1	-0.27	143.9	C1'-exo	4	-1	not measured	35.2193	C
AP1	seq_24	A	5.5	T-C	4.18284	0.4	0.12	149.4	C2'-endo	3	-0.51	not measured	37.0683	T
AP1	seq_24	A	6.5	C-C	4.32775	0.1	-0.07	150.4	C2'-endo	0	-0.58	not measured	37.9406	C
AP1	seq_24	A	7.5	C-C	4.43916	0	-0.18	153.6	C2'-endo	2	-0.57	not measured	38.3923	C
AP1	seq_25	A	-7.5	C-T	4.5695	0.2	0.08	141.6	C1'-exo	10	-0.83	not measured	38.5536	C
AP1	seq_25	B	-5.5	C-C	4.32254	0.4	-0.23	149.9	C2'-endo	3	-0.35	not measured	42.0017	C
AP1	seq_25	B	-4.5	T-C	4.17146	0.5	-0.2	149.9	C2'-endo	3	-0.43	not measured	38.9702	C
AP1	seq_25	B	-1.5	T-C	4.30964	0.2	-0.06	150.5	C2'-endo	1	-0.71	not measured	37.692	C
AP1	seq_25	A	0.5	C-T	4.38405	0	-0.27	143.3	C1'-exo	2	-1.28	not measured	28.8308	C
AP1	seq_25	A	1.5	T-C	4.177	0.3	0.14	142.6	C1'-exo	5	-0.59	not measured	33.7507	T
AP1	seq_25	A	4.5	C-C	4.36056	0	-0.3	147.3	C2'-endo	4	-1.47	not measured	29.8003	C
AP1	seq_25	A	5.5	C-T	4.5835	0	-0.38	144	C2'-endo	3	-1.15	not measured	31.5416	C
AP1	seq_25	A	6.5	T-C	4.19289	0.3	0.19	145.9	C2'-endo	4	-0.56	not measured	35.7578	T
AP1	seq_25	A	7.5	C-C	4.29905	0	-0.25	147.1	C2'-endo	3	-0.92	not measured	32.0445	C
AP1	seq_26	B	-6.5	C-T	4.57502	0	0.18	155	C2'-endo	6	-0.61	not measured	38.0871	T
AP1	seq_26	B	-5.5	C-C	4.54937	0	0.22	161.4	C2'-endo	5	-0.64	not measured	40.1738	C
AP1	seq_26	A	-3.5	C-T	4.51944	0	-0.15	160.5	C2'-endo	6	-0.9	not measured	37.9685	C
AP1	seq_26	B	-1.5	T-C	4.31172	0.1	-0.02	158	C2'-endo	1	-0.54	not measured	37.2644	C
AP1	seq_26	B	-0.5	C-T	4.47754	0	0.23	153.9	C2'-endo	2	-1.18	not measured	33.9595	T
AP1	seq_26	A	1.5	T-C	4.37133	0.1	-0.02	152.6	C2'-endo	0	-0.53	not measured	38.9095	T
AP1	seq_26	A	4.5	C-T	4.50265	0	-0.13	153.4	C2'-endo	6	-0.99	not measured	37.3464	C
AP1	seq_26	A	5.5	T-C	4.3025	0.3	0.15	154.4	C2'-endo	1	-0.39	not measured	41.5086	T
AP1	seq_26	A	6.5	C-C	4.49075	0	-0.19	158.6	C2'-endo	3	-0.44	not measured	41.9187	C
AP1	seq_26	A	7.5	C-C	4.5012	0	-0.19	162.1	C2'-endo	3	-0.38	not measured	42.1006	C
AP1	seq_27	B	-7.5	C-T	4.47241	0.1	0.15	154.2	C2'-endo	5	-0.75	not measured	37.7076	T
AP1	seq_27	B	-6.5	C-C	4.4391	0	0.17	159.1	C2'-endo	2	-0.57	not measured	39.8393	C
AP1	seq_27	B	-5.5	C-C	4.36485	0	0.09	158.5	C2'-endo	2	-0.68	not measured	39.4662	C
AP1	seq_27	B	-4.5	T-C	4.20197	0.4	-0.24	155.7	C2'-endo	2	-0.48	not measured	40.412	C
AP1	seq_27	B	-1.5	T-C	4.28949	0.2	-0.11	156.6	C2'-endo	1	-0.62	not measured	39.4111	C
AP1	seq_27	A	0.5	C-T	4.37696	0	-0.17	153.2	C2'-endo	3	-1.13	not measured	33.7056	C
AP1	seq_27	A	1.5	T-C	4.12626	0.3	0.19	150.9	C2'-endo	2	-0.66	not measured	37.6336	T
AP1	seq_27	A	6.5	T-C	4.22873	0.2	0.13	153.2	C2'-endo	1	-0.6	not measured	39.2635	T
AP1	seq_27	A	7.5	C-T	4.46641	0.1	-0.12	155.2	C2'-endo	4	-0.92	not measured	37.0096	C
AP1	seq_28	B	-6.5	C-C	4.46269	0.1	0.1	159.6	C2'-endo	1	-0.34	not measured	38.4661	C
AP1	seq_28	B	-5.5	C-C	4.3799	0.1	0.07	156.6	C2'-endo	1	-0.64	not measured	36.607	C
AP1	seq_28	A	-3.5	C-T	4.44836	0.2	-0.18	157.3	C2'-endo	4	-0.65	not measured	35.1134	C
AP1	seq_28	B	-1.5	T-C	4.2975	0.2	-0.02	155.6	C2'-endo	3	-0.34	not measured	35.9283	C
AP1	seq_28	B	-0.5	C-T	4.51856	0	0.39	152.1	C2'-endo	1	-1.05	not measured	33.1171	T
AP1	seq_28	A	1.5	T-C	4.30687	0.2	0.04	147.7	C2'-endo	1	-0.62	not measured	34.813	T
AP1	seq_28	A	4.5	T-C	4.12453	0.6	0.28	137	C1'-exo	4	-0.49	not measured	35.0627	T
AP1	seq_28	A	5.5	C-C	4.2729	0.2	0.02	148.8	C2'-endo	2	-0.79	not measured	34.463	C
AP1	seq_28	A	6.5	C-C	4.5731	0	-0.26	151.8	C2'-endo	2	-0.53	not measured	36.1147	C
AP1	seq_29	B	-7.5	C-T	4.56617	0	0.32	149.4	C2'-endo	5	-0.93	not measured	35.095	T
AP1	seq_29	B	-6.5	C-C	4.52039	0	0.35	155.6	C2'-endo	3	-0.86	not measured	35.8868	C
AP1	seq_29	B	-5.5	C-C	4.43748	0	0.16	152.5	C2'-endo	2	-1.01	not measured	34.7918	C
AP1	seq_29	B	-4.5	C-C	4.31857	0	0.16	148.1	C2'-endo	1	-1.21	not measured	31.4063	C
AP1	seq_29	B	-1.5	T-C	4.31967	0.2	-0.02	153.4	C2'-endo	1	-0.52	not measured	36.2026	C
AP1	seq_29	B	-0.5	C-T	4.49478	0	0.33	148.6	C2'-endo	3	-1.21	not measured	31.7388	T
AP1	seq_29	A	1.5	T-C	4.28274	0.2	0.07	146.5	C2'-endo	1	-0.74	not measured	36.3686	T
AP1	seq_29	A	4.5	T-T	4.1899	0.9	0.34	143.3	C1'-exo	6	-0.52	not measured	38.1094	T
AP1	seq_29	A	5.5	T-C	4.11827	0.7	0.34	146	C2'-endo	2	-0.5	not measured	38.3965	T
AP1	seq_29	A	6.5	C-C	4.46487	0	-0.16	150.4	C2'-endo	4	-0.69	not measured	38.6786	C
AP1	seq_29	A	7.5	C-C	4.58731	0	-0.32	154.8	C2'-endo	6	-0.67	not measured	38.7724	C
AP1	seq_3	B	-6.5	C-C	4.49197	0	0.32	155.1	C2'-endo	2	-0.52	not measured	38.1523	C
AP1	seq_3	B	-5.5	C-C	4.23302	0.3	-0.18	149.2	C2'-endo	1	-0.57	not measured	37.8676	C
AP1	seq_3	B	-4.5	T-C	4.18319	0.4	-0.19	149	C2'-endo	4	-0.48	not measured	36.8089	C
AP1	seq_3	B	-1.5	T-C	4.17001	0.4	-0.19	148.8	C2'-endo	3	-0.52	not measured	36.1512	C
AP1	seq_3	B	-0.5	C-T	4.38901	0.1	0.23	145.4	C2'-endo	2	-1.11	not measured	32.0197	T
AP1	seq_3	A	1.5	T-C	4.24132	0.4	0.19	145.1	C2'-endo	1	-0.6	not measured	37.2042	T
AP1	seq_3	A	4.5	T-C	4.3057	0.3	0.09	140.2	C1'-exo	3	-0.4	not measured	37.0422	T
AP1	seq_3	A	7.5	C-T	4.40525	0.2	-0.09	144.9	C2'-endo	4	-0.84	not measured	37.0989	C
AP1	seq_30	B	-6.5	C-C	4.40093	0	0.11	153.2	C2'-endo	1	-0.77	not measured	35.7054	C
AP1	seq_30	B	-5.5	C-C	4.40552	0	0.14	152.6	C2'-endo	1	-0.91	not measured	34.9719	C
AP1	seq_30	B	-4.5	C-C	4.33072	0	0.19	149.9	C2'-endo	1	-1.12	not measured	33.2244	C
AP1	seq_30	B	-1.5	T-C	4.17532	0.3	-0.13	150.9	C2'-endo	4	-0.58	not measured	36.022	C
AP1	seq_30	B	-0.5	C-T	4.38484	0	0.21	147	C2'-endo	3	-1.14	not measured	32.5853	T
AP1	seq_30	A	1.5	T-C	4.26999	0.1	0.03	146.8	C2'-endo	1	-0.72	not measured	36.1542	T
AP1	seq_30	B	5.5	T-C	4.22595	0.2	-0.09	153.2	C2'-endo	1	-0.72	not measured	37.5417	C
AP1	seq_30	A	7.5	T-T	4.22708	0.4	0.24	143.4	C1'-exo	4	-0.83	not measured	35.2202	T
AP1	seq_31	B	-5.5	C-C	4.39138	0.3	0.04	144.4	C2'-endo	2	-0.54	not measured	35.5367	C
AP1	seq_31	B	-4.5	C-C	4.20383	0.2	0.02	132	C1'-exo	2	-0.96	not measured	31.4624	C
AP1	seq_31	B	-1.5	T-C	4.14923	0.6	-0.21	140.2	C1'-exo	5	-0.45	not measured	34.6313	C
AP1	seq_31	B	-0.5	C-T	4.29757	0.3	0.1	134.8	C1'-exo	4	-0.98	not measured	32.61	T
AP1	seq_31	A	1.5	T-C	4.18256	0.3	0.09	131.8	C1'-exo	3	-0.71	not measured	32.5766	T
AP1	seq_31	B	7.5	C-C	4.22241	0.1	0.11	135.6	C1'-exo	4	-0.94	not measured	29.8282	C
AP1	seq_32	A	-7.5	C-C	4.27462	0.3	-0.01	142.2	C1'-exo	3	-0.63	not measured	34.3063	C
AP1	seq_32	B	-5.5	C-C	4.31106	0.3	0.03	146.7	C2'-endo	4	-0.43	not measured	35.2365	C
AP1	seq_32	B	-4.5	T-C	4.17606	0.5	-0.13	144.1	C2'-endo	5	-0.51	not measured	34.5061	C
AP1	seq_32	B	-1.5	T-C	4.30856	0.2	-0.05	147.1	C2'-endo	1	-0.73	not measured	35.9909	C
AP1	seq_32	A	0.5	C-T	4.51494	0	-0.37	139.8	C1'-exo	3	-1.16	not measured	31.4512	C
AP1	seq_32	A	1.5	T-C	4.29421	0.2	0	142.6	C1'-exo	3	-0.47	not measured	35.1795	T
AP1	seq_32	A	4.5	C-T	4.48145	0.1	-0.25	138.7	C1'-exo	4	-1.01	not measured	33.3358	C
AP1	seq_32	A	5.5	T-T	4.31529	0.6	0.09	141.3	C1'-exo	5	-0.49	not measured	37.0795	T
AP1	seq_32	A	6.5	T-C	4.17074	0.7	0.3	144.4	C2'-endo	2	-0.36	not measured	38.3446	T
AP1	seq_32	A	7.5	C-C	4.40524	0.1	-0.17	147.5	C2'-endo	1	-0.65	not measured	37.0888	C
AP1	seq_4	B	-6.5	C-C	4.4327	0	0.15	146.9	C2'-endo	1	-0.81	not measured	34.3148	C
AP1	seq_4	B	-5.5	C-C	4.32769	0.1	0.02	143.9	C1'-exo	2	-0.96	not measured	33.3878	C
AP1	seq_4	B	-4.5	C-C	4.22343	0.1	0.11	140.6	C1'-exo	3	-1.14	not measured	30.4903	C
AP1	seq_4	B	-1.5	T-C	4.20397	0.4	-0.14	145.6	C2'-endo	6	-0.47	not measured	34.1855	C
AP1	seq_4	B	-0.5	C-T	4.36478	0.1	0.23	139.4	C1'-exo	4	-1.15	not measured	29.7246	T
AP1	seq_4	A	1.5	T-C	4.29142	0.3	0.08	141.9	C1'-exo	1	-0.68	not measured	35.9039	T
AP1	seq_4	A	4.5	T-C	4.23926	0.3	0.02	136.7	C1'-exo	4	-0.6	not measured	32.6481	T
AP1	seq_4	A	7.5	C-C	4.38295	0.1	-0.05	142.4	C1'-exo	1	-0.77	not measured	36.205	C
AP1	seq_5	B	-5.5	C-C	4.14077	0.3	-0.04	139.9	C1'-exo	6	-0.83	not measured	31.8135	C
AP1	seq_5	B	-4.5	T-C	4.08971	0.5	-0.11	138.6	C1'-exo	8	-0.62	not measured	30.8724	C
AP1	seq_5	B	-1.5	T-C	4.10462	0.6	-0.24	140	C1'-exo	4	-0.6	not measured	34.9469	C
AP1	seq_5	B	-0.5	C-T	4.39507	0.1	0.22	141.1	C1'-exo	3	-1.06	not measured	32.289	T
AP1	seq_5	A	1.5	T-C	4.21244	0.4	0.14	136.1	C1'-exo	3	-0.61	not measured	33.4181	T
AP1	seq_5	A	4.5	C-C	4.34781	0.1	-0.03	133.2	C1'-exo	1	-1.08	not measured	34.4994	C
AP1	seq_5	A	7.5	T-T	4.29372	0.7	0.13	131.9	C1'-exo	5	-0.49	not measured	35.5382	T
AP1	seq_6	B	-7.5	C-C	4.3622	0.2	0.07	152.7	C2'-endo	3	-0.4	not measured	36.7206	C
AP1	seq_6	B	-4.5	T-C	4.33061	0.3	0.01	152.1	C2'-endo	3	-0.4	not measured	36.4377	C
AP1	seq_6	B	-1.5	T-C	4.2468	0.5	-0.07	148.7	C2'-endo	3	-0.45	not measured	35.8801	C
AP1	seq_6	B	-0.5	C-T	4.38299	0.2	0.2	145.5	C2'-endo	3	-0.95	not measured	33.2756	T
AP1	seq_6	A	1.5	T-C	4.24814	0.4	0.09	142.2	C1'-exo	3	-0.47	not measured	34.8849	T
AP1	seq_6	A	4.5	T-T	4.26038	0.8	0.21	136.7	C1'-exo	5	-0.55	not measured	38.2853	T
AP1	seq_6	A	5.5	T-T	4.23425	0.9	0.3	142.2	C1'-exo	5	-0.35	not measured	39.6193	T
AP1	seq_6	A	6.5	T-T	4.35771	0.4	-0.11	142.2	C1'-exo	5	-0.55	not measured	35.4579	T
AP1	seq_7	A	-5.5	C-T	4.52265	0.2	-0.05	140.1	C1'-exo	8	-1	not measured	37.3609	C
AP1	seq_7	A	-4.5	T-C	4.27515	0.3	0.14	143	C1'-exo	3	-0.8	not measured	36.7444	T
AP1	seq_7	A	-3.5	C-T	4.52273	0.1	-0.1	142.1	C1'-exo	7	-1.11	not measured	35.3114	C
AP1	seq_7	B	-1.5	T-C	4.24185	0.3	-0.17	141.6	C1'-exo	2	-0.65	not measured	34.3809	C
AP1	seq_7	B	-0.5	C-T	4.54389	0	0.32	142.2	C1'-exo	3	-1.13	not measured	32.3486	T
AP1	seq_7	A	1.5	T-C	4.27855	0.2	0.11	141.9	C1'-exo	1	-0.86	not measured	34.3458	T
AP1	seq_7	A	4.5	C-C	4.37439	0	-0.25	142.8	C1'-exo	3	-1.51	not measured	28.0161	C
AP1	seq_7	A	5.5	C-C	4.45589	0	-0.32	139.3	C1'-exo	4	-1.42	not measured	26.9019	C
AP1	seq_7	A	6.5	C-C	4.37866	0	-0.15	140.7	C1'-exo	3	-1.23	not measured	28.7607	C
AP1	seq_7	A	7.5	C-C	4.33118	0	-0.12	142.4	C1'-exo	5	-1.36	not measured	28.6338	C
AP1	seq_8	A	-7.5	T-C	4.06715	0.5	0.27	140.1	C1'-exo	5	-0.81	not measured	32.511	T
AP1	seq_8	A	-6.5	C-C	4.23151	0.1	0.03	140.9	C1'-exo	3	-0.96	not measured	33.3958	C
AP1	seq_8	A	-5.5	C-T	4.47903	0.1	-0.14	141.8	C1'-exo	5	-1	not measured	33.5209	C
AP1	seq_8	A	-4.5	T-C	4.15329	0.4	0.25	143.1	C1'-exo	3	-0.77	not measured	34.4964	T
AP1	seq_8	A	-3.5	C-T	4.37438	0.1	0.04	140.2	C1'-exo	2	-1.26	not measured	31.3145	C
AP1	seq_8	B	-1.5	T-C	4.07119	0.5	-0.32	138.2	C1'-exo	6	-0.75	not measured	32.3716	C
AP1	seq_8	B	-0.5	C-T	4.332	0.1	0.2	139.1	C1'-exo	4	-1.13	not measured	30.3056	T
AP1	seq_8	A	1.5	T-C	4.18045	0.3	0.19	139.4	C1'-exo	3	-0.85	not measured	33.5241	T
AP1	seq_8	A	4.5	T-C	4.21347	0.3	0.14	138.9	C1'-exo	3	-0.68	not measured	34.6152	T
AP1	seq_8	A	5.5	C-C	4.19666	0.2	0.11	144.1	C2'-endo	2	-0.93	not measured	34.1389	C
AP1	seq_8	A	6.5	C-C	4.29682	0.1	0.02	142.6	C1'-exo	0	-1.14	not measured	32.9723	C
AP1	seq_8	A	7.5	C-C	4.32239	0	-0.13	143.1	C1'-exo	2	-1.21	not measured	30.8717	C
AP1	seq_9	B	-6.5	C-C	4.46048	0	0.27	156.3	C2'-endo	2	-0.4	not measured	38.1835	C
AP1	seq_9	B	-5.5	T-C	4.13559	0.7	-0.26	149	C2'-endo	4	-0.37	not measured	36.6061	C
AP1	seq_9	B	-4.5	T-T	4.15367	0.9	-0.25	142.6	C1'-exo	5	-0.46	not measured	36.6136	T
AP1	seq_9	B	-1.5	T-C	4.2481	0.4	-0.13	147.6	C2'-endo	1	-0.66	not measured	35.6893	C
AP1	seq_9	A	0.5	C-T	4.4283	0	-0.22	140.6	C1'-exo	2	-1.1	not measured	32.5583	C
AP1	seq_9	A	1.5	T-C	4.20782	0.4	0.14	144.2	C2'-endo	2	-0.57	not measured	34.7032	T
AP1	seq_9	A	4.5	T-C	4.20729	0.4	0.17	140	C1'-exo	4	-0.51	not measured	35.5695	T
AP1	seq_9	A	5.5	C-C	4.18633	0.3	0.05	147.1	C2'-endo	2	-0.7	not measured	33.9237	C
AP1	seq_9	A	6.5	C-C	4.37049	0.1	-0.09	146	C2'-endo	0	-0.73	not measured	35.7573	C
AP1	seq_9	A	7.5	C-C	4.37982	0	-0.12	152.4	C2'-endo	1	-0.69	not measured	36.3044	C
ETS	seq_1	A	-7.5	T-T	4.42087	0.3	0.28	167.6	C2'-endo	4	-0.17	not measured	40.983	T
ETS	seq_1	A	-6.5	T-C	4.37778	0	0.05	165.4	C2'-endo	7	-0.26	not measured	42.0754	T
ETS	seq_1	A	-5.5	C-C	4.82393	0	-0.36	169.7	C2'-endo	12	-0.82	not measured	42.4266	C
ETS	seq_1	B	-3.5	C-C	4.36402	0	-0.08	164.6	C2'-endo	5	-0.39	not measured	36.402	C
ETS	seq_1	B	-0.5	C-C	4.57054	0	0.37	168.5	C2'-endo	10	-1.22	not measured	35.6445	C
ETS	seq_1	B	0.5	T-C	4.28174	0.1	-0.25	168.8	C2'-endo	8	-0.3	not measured	45.1737	C
ETS	seq_1	B	1.5	T-T	4.36158	0.4	-0.45	165.2	C2'-endo	4	-0.13	not measured	43.1627	T
ETS	seq_1	B	2.5	C-T	4.86934	0	0.29	166.8	C2'-endo	7	-0.68	not measured	37.3539	T
ETS	seq_1	B	3.5	C-C	5.41958		0.88	175.1	C2'-endo		-1.3	not measured	38.1254	C
ETS	seq_1	B	4.5	C-C	4.65786	0	0.35	169.3	C2'-endo	14	-1.26	not measured	39.706	C
ETS	seq_1	B	5.5	T-C	4.28095	0.1	-0.23	168.4	C2'-endo	5	-0.26	not measured	45.3021	C
ETS	seq_1	B	6.5	T-T	4.34655	0.4	-0.38	165.4	C2'-endo	2	-0.15	not measured	43.2804	T
ETS	seq_1	B	7.5	T-T	4.50669	0.2	-0.12	166.3	C2'-endo	2	-0.14	not measured	41.798	T
ETS	seq_10	A	-5.5	T-C	4.19826	0.3	0.28	151.9	C2'-endo	3	-0.46	not measured	39.8564	T
ETS	seq_10	A	-4.5	C-C	4.40373	0	-0.13	153.6	C2'-endo	5	-1.13	not measured	31.3992	C
ETS	seq_10	B	-2.5	C-T	4.88674	0	0.54	147.1	C2'-endo	5	-1.41	not measured	29.603	T
ETS	seq_10	B	-1.5	C-C	4.73544		0.35	153.9	C2'-endo		-1.48	not measured	32.2983	C
ETS	seq_10	B	-0.5	C-C	4.45899	0	0.37	151.2	C2'-endo	6	-1.42	not measured	29.2102	C
ETS	seq_10	B	0.5	T-C	4.07766	0.2	-0.28	149.3	C2'-endo	8	-0.77	not measured	33.5201	C
ETS	seq_10	B	1.5	T-T	4.5024	0.1	-0.06	151	C2'-endo	4	-0.52	not measured	36.4729	T
ETS	seq_10	B	2.5	C-T	4.93384	0	0.5	151.3	C2'-endo	8	-1.59	not measured	32.1283	T
ETS	seq_10	B	3.5	C-C	4.78034	0	0.25	153.3	C2'-endo	11	-1.49	not measured	34.9238	C
ETS	seq_10	B	4.5	C-C	4.5778	0	0.25	151.1	C2'-endo	7	-1.31	not measured	33.2872	C
ETS	seq_10	A	6.5	C-T	4.84973	0	-0.27	161.1	C2'-endo	8	-1.14	not measured	35.11	C
ETS	seq_10	A	7.5	T-T	4.66456	0.2	0.19	149.5	C2'-endo	8	-0.48	not measured	39.1666	T
ETS	seq_11	B	-6.5	C-C	4.66887	0	0.1	163.3	C2'-endo	6	-0.34	not measured	43.525	C
ETS	seq_11	B	-5.5	T-C	4.49572	0.1	-0.08	163	C2'-endo	2	-0.17	not measured	44.0334	C
ETS	seq_11	B	-4.5	T-T	4.47697	0.5	-0.31	155.6	C2'-endo	6	-0.29	not measured	42.0731	T
ETS	seq_11	B	-3.5	C-T	4.70931	0	0.31	152.5	C2'-endo	7	-1.17	not measured	33.959	T
ETS	seq_11	B	-0.5	C-C	4.54243	0	0.26	156.9	C2'-endo	6	-1.32	not measured	34.3387	C
ETS	seq_11	B	0.5	T-C	4.22679	0.3	-0.36	158.8	C2'-endo	3	-0.39	not measured	43.2579	C
ETS	seq_11	B	1.5	T-T	4.34128	0.6	-0.46	154.5	C2'-endo	5	-0.27	not measured	42.5164	T
ETS	seq_11	B	2.5	C-T	4.82367	0	0.51	154.2	C2'-endo	7	-1.17	not measured	34.3092	T
ETS	seq_11	B	3.5	C-C	4.65409	0	0.31	158.7	C2'-endo	9	-1.36	not measured	35.7731	C
ETS	seq_11	A	5.5	T-T	4.53932	0.2	0.19	155.6	C2'-endo	7	-0.65	not measured	38.3769	T
ETS	seq_11	B	7.5	T-C	4.3999	0.1	-0.05	159.3	C2'-endo	2	-0.48	not measured	37.4709	C
ETS	seq_12	B	-7.5	C-T	4.58072	0	0.21	143.6	C1'-exo	0	-1.12	not measured	31.0762	T
ETS	seq_12	B	-6.5	C-C	4.34503	0	0.13	147.5	C2'-endo	4	-0.97	not measured	31.7922	C
ETS	seq_12	B	-5.5	T-C	4.29423	0.5	-0.51	152.6	C2'-endo	1	-0.22	not measured	42.7488	C
ETS	seq_12	B	-4.5	C-T	4.73344	0	0.25	151.2	C2'-endo	8	-0.72	not measured	37.8938	T
ETS	seq_12	A	-2.5	C-C	4.57964	0	-0.28	151.5	C2'-endo	3	-0.91	not measured	35.1163	C
ETS	seq_12	B	-0.5	C-C	4.42445	0	0.21	148.7	C2'-endo	4	-1.12	not measured	29.699	C
ETS	seq_12	B	0.5	T-C	4.04797	0.3	-0.27	145.1	C2'-endo	10	-0.75	not measured	31.1677	C
ETS	seq_12	B	1.5	T-T	4.2679	0.4	-0.32	145.6	C2'-endo	4	-0.67	not measured	35.131	T
ETS	seq_12	B	2.5	C-T	4.65453	0	0.19	146.5	C2'-endo	3	-1.18	not measured	33.4691	T
ETS	seq_12	B	3.5	C-C	4.47615	0	0.32	149.3	C2'-endo	5	-1.2	not measured	31.6244	C
ETS	seq_12	B	4.5	T-C	4.17002	0.2	-0.31	146.3	C2'-endo	3	-0.91	not measured	34.6383	C
ETS	seq_13	B	-7.5	C-C	4.5002	0	0.34	156.5	C2'-endo	2	-0.6	not measured	38.2572	C
ETS	seq_13	B	-6.5	T-C	4.21783	0.6	-0.44	154.3	C2'-endo	3	-0.2	not measured	42.9518	C
ETS	seq_13	B	-5.5	T-T	4.44265	0.3	-0.11	151.6	C2'-endo	4	-0.53	not measured	39.0675	T
ETS	seq_13	B	-0.5	C-C	4.43766	0	0.28	151.1	C2'-endo	3	-1.06	not measured	30.875	C
ETS	seq_13	B	0.5	T-C	4.102	0.2	-0.28	147.1	C2'-endo	8	-0.69	not measured	31.8667	C
ETS	seq_13	B	1.5	T-T	4.20542	0.5	-0.43	145.9	C2'-endo	4	-0.58	not measured	36.7783	T
ETS	seq_13	B	2.5	C-T	4.73806	0	0.38	150.3	C2'-endo	6	-1.13	not measured	35.2669	T
ETS	seq_13	B	3.5	C-C	4.77263	0	0.37	155.5	C2'-endo	8	-1.12	not measured	37.3462	C
ETS	seq_13	B	4.5	C-C	4.40674	0.1	-0.17	149.1	C2'-endo	3	-1.07	not measured	36.0841	C
ETS	seq_13	B	5.5	C-C	4.53516	0	0.17	151.6	C2'-endo	1	-0.81	not measured	35.0414	C
ETS	seq_13	A	7.5	C-T	4.75905	0.2	0.21	158.6	C2'-endo	7	-0.47	not measured	41.6679	C
ETS	seq_14	B	-7.5	C-T	4.53292	0	0.21	141.3	C1'-exo	2	-1.2	not measured	30.3069	T
ETS	seq_14	B	-6.5	C-C	4.28023	0	0	133.2	C1'-exo	4	-1.26	not measured	27.101	C
ETS	seq_14	B	-5.5	C-C	4.14798	0.1	-0.09	135.1	C1'-exo	5	-1.07	not measured	28.4695	C
ETS	seq_14	B	-4.5	T-C	4.16824	0.3	-0.17	141.7	C1'-exo	4	-0.73	not measured	32.4089	C
ETS	seq_14	A	-2.5	C-C	4.35842	0	-0.12	144.5	C2'-endo	2	-1.19	not measured	30.9189	C
ETS	seq_14	B	-0.5	C-C	4.43804	0	0.17	146.3	C2'-endo	2	-1.11	not measured	33.2393	C
ETS	seq_14	B	0.5	T-C	4.00174	0.9	-0.56	139.7	C1'-exo	5	-0.58	not measured	36.1047	C
ETS	seq_14	B	1.5	T-T	4.23387	0.9	-0.37	142.2	C1'-exo	5	-0.42	not measured	37.5554	T
ETS	seq_14	B	2.5	C-T	4.59078	0	0.28	143	C1'-exo	4	-0.98	not measured	33.8186	T
ETS	seq_14	B	3.5	C-C	4.427	0	0.1	143.6	C1'-exo	2	-1.03	not measured	32.8375	C
ETS	seq_14	B	4.5	C-C	4.36735	0.1	0.09	142.4	C1'-exo	2	-1	not measured	32.7961	C
ETS	seq_14	A	6.5	C-T	4.75521	0	-0.28	152.6	C2'-endo	5	-0.77	not measured	35.0704	C
ETS	seq_15	A	-7.5	T-T	4.23853	0.5	0.12	154.7	C2'-endo	3	-0.5	not measured	35.6086	T
ETS	seq_15	A	-6.5	T-C	4.17201	0.3	0.15	152	C2'-endo	4	-0.46	not measured	33.9652	T
ETS	seq_15	A	-5.5	C-C	4.795	0	-0.49	155.8	C2'-endo	4	-0.22	not measured	38.312	C
ETS	seq_15	B	-3.5	C-C	4.47985	0	0.3	160.3	C2'-endo	4	-0.8	not measured	31.3513	C
ETS	seq_15	B	-0.5	C-C	4.49806	0	0.19	157.2	C2'-endo	4	-1.25	not measured	32.5348	C
ETS	seq_15	B	0.5	T-C	4.03253	0.5	-0.45	149.5	C2'-endo	3	-0.67	not measured	34.5354	C
ETS	seq_15	B	1.5	T-T	4.27987	0.4	-0.2	151.8	C2'-endo	3	-0.55	not measured	35.911	T
ETS	seq_15	B	2.5	C-T	4.63107	0	0.31	155.2	C2'-endo	5	-1.1	not measured	33.7418	T
ETS	seq_15	B	3.5	C-C	4.5351	0	0.22	158.9	C2'-endo	5	-1.18	not measured	34.3438	C
ETS	seq_15	B	4.5	C-C	4.27255	0.1	-0.1	155.4	C2'-endo	2	-0.87	not measured	35.7642	C
ETS	seq_15	B	5.5	T-C	4.14466	0.6	-0.43	156.7	C2'-endo	3	-0.3	not measured	40.0223	C
ETS	seq_15	B	6.5	C-T	4.69303	0	0.43	160.3	C2'-endo	6	-0.74	not measured	36.0163	T
ETS	seq_16	B	-6.5	C-C	4.92534	0	0.89	156.4	C2'-endo	4	0.52	not measured	40.6157	C
ETS	seq_16	B	-5.5	T-C	4.06058	1.8	-0.86	150.8	C2'-endo	6	0.2	not measured	40.6109	C
ETS	seq_16	B	-4.5	T-T	4.36702	0.7	-0.07	144.6	C2'-endo	5	-0.35	not measured	39.0653	T
ETS	seq_16	A	-2.5	C-T	4.37574	0.4	0.02	131.9	C1'-exo	4	-0.85	not measured	36.3745	C
ETS	seq_16	B	-0.5	C-C	4.40855	0.1	0.4	141.6	C1'-exo	2	-0.79	not measured	28.3451	C
ETS	seq_16	B	0.5	T-C	3.93812	1.6	-0.95	132.7	C1'-exo	5	-0.14	not measured	37.0924	C
ETS	seq_16	B	1.5	T-T	4.14487	1.1	-0.33	137.7	C1'-exo	6	-0.34	not measured	36.2023	T
ETS	seq_16	B	2.5	C-T	4.43773	0.1	0.3	140.1	C1'-exo	4	-0.84	not measured	32.784	T
ETS	seq_16	B	3.5	C-C	4.20593	0.2	0.17	140	C1'-exo	2	-0.84	not measured	32.2766	C
ETS	seq_16	B	4.5	T-C	4.07073	1	-0.51	141.9	C1'-exo	3	-0.34	not measured	37.8234	C
ETS	seq_16	B	5.5	C-T	4.33398	0.4	0.1	142.6	C1'-exo	4	-0.76	not measured	34.946	T
ETS	seq_17	B	-6.5	T-C	4.42417	0	0	167.1	C2'-endo	4	-0.27	not measured	40.4341	C
ETS	seq_17	B	-5.5	T-T	4.47032	0.1	-0.14	161.2	C2'-endo	2	-0.5	not measured	39.064	T
ETS	seq_17	A	-3.5	C-C	4.49475	0	-0.27	161.3	C2'-endo	5	-1.06	not measured	34.2822	C
ETS	seq_17	A	-2.5	C-C	4.63807	0	-0.2	164.3	C2'-endo	5	-0.81	not measured	37.7299	C
ETS	seq_17	B	-0.5	C-C	4.5718	0	0.24	165.4	C2'-endo	4	-0.89	not measured	35.6531	C
ETS	seq_17	B	0.5	T-C	4.28539	0	-0.13	163.4	C2'-endo	6	-0.58	not measured	37.4277	C
ETS	seq_17	B	1.5	T-T	4.42218	0.2	-0.24	160.3	C2'-endo	2	-0.56	not measured	38.4083	T
ETS	seq_17	B	2.5	C-T	4.6607	0	0.15	159.9	C2'-endo	5	-1.11	not measured	34.9133	T
ETS	seq_17	B	3.5	C-C	4.54203	0	0.08	164.6	C2'-endo	5	-0.84	not measured	38.5386	C
ETS	seq_17	B	6.5	C-C	4.68315	0	0.27	165.3	C2'-endo	7	-0.99	not measured	36.7801	C
ETS	seq_17	B	7.5	T-C	4.36345	0	-0.13	164.1	C2'-endo	2	-0.5	not measured	38.1541	C
ETS	seq_18	B	-7.5	C-T	4.53222	0.1	0.24	146.9	C2'-endo	4	-0.96	not measured	34.6792	T
ETS	seq_18	B	-6.5	C-C	4.3404	0.1	0.07	148	C2'-endo	1	-0.77	not measured	34.9462	C
ETS	seq_18	B	-5.5	T-C	4.16707	0.4	-0.21	147.5	C2'-endo	4	-0.51	not measured	36.0222	C
ETS	seq_18	B	-4.5	T-T	4.33185	0.5	-0.12	145.3	C2'-endo	4	-0.58	not measured	35.962	T
ETS	seq_18	B	-3.5	C-T	4.57557	0	0.27	144.4	C2'-endo	5	-1.08	not measured	34.5239	T
ETS	seq_18	B	-0.5	C-C	4.37455	0	0.11	147.2	C2'-endo	1	-0.92	not measured	32.9903	C
ETS	seq_18	B	0.5	T-C	4.04445	0.5	-0.24	143.1	C1'-exo	7	-0.71	not measured	31.6775	C
ETS	seq_18	B	1.5	T-T	4.21487	0.8	-0.36	142.7	C1'-exo	5	-0.5	not measured	36.0809	T
ETS	seq_18	B	2.5	C-T	4.63486	0	0.43	144.2	C2'-endo	3	-1.12	not measured	31.863	T
ETS	seq_18	B	3.5	C-C	4.34095	0	0.16	144.8	C2'-endo	4	-1.14	not measured	32.5347	C
ETS	seq_18	B	4.5	T-C	4.1169	0.7	-0.42	145.3	C2'-endo	4	-0.62	not measured	36.5926	C
ETS	seq_18	B	5.5	C-T	4.537	0.1	0.24	146.5	C2'-endo	4	-0.92	not measured	34.7207	T
ETS	seq_19	A	-7.5	T-T	4.41238	0.8	0.41	148.3	C2'-endo	5	-0.14	not measured	38.734	T
ETS	seq_19	A	-6.5	T-C	4.14602	0.7	0.5	144.8	C2'-endo	4	-0.51	not measured	37.0303	T
ETS	seq_19	A	-5.5	C-C	4.69185		-0.38	138.1	C1'-exo		-1.73	not measured	34.2422	C
ETS	seq_19	A	-4.5	C-T	5.00019	0	-0.78	54.2	C4'-exo	8	-1.07	not measured	24.0927	C
ETS	seq_19	A	-3.5	T-C	4.29949	0.2	0.3	156.5	C2'-endo	5	-0.64	not measured	36.4985	T
ETS	seq_19	A	-2.5	C-C	4.3665	0	-0.2	144.2	C2'-endo	9	-1.5	not measured	26.9576	C
ETS	seq_19	B	-0.5	C-C	4.39531		0.33	119.2	C1'-exo		-2.01	not measured	19.451	C
ETS	seq_19	B	0.5	T-C	4.03117	0.4	-0.34	128.8	C1'-exo	11	-0.85	not measured	31.1123	C
ETS	seq_19	B	1.5	T-T	4.58487	0.2	-0.16	149.6	C2'-endo	4	-0.55	not measured	37.6225	T
ETS	seq_19	B	2.5	C-T	5.02719	0	0.5	147.2	C2'-endo	7	-1.25	not measured	30.5617	T
ETS	seq_19	B	3.5	C-C	4.94226		0.2	94.7	O4'-endo		-1.81	not measured	36.8279	C
ETS	seq_19	B	4.5	C-C	4.96091	0	0.46	137.1	C1'-exo	5	-1.62	not measured	29.68	C
ETS	seq_19	B	5.5	C-C	4.73997	0	0.34	117.5	C1'-exo	11	-1.68	not measured	32.0072	C
ETS	seq_2	B	-6.5	C-C	4.80816	0.2	0.07	155.5	C2'-endo	5	0.36	not measured	43.2169	C
ETS	seq_2	B	-5.5	T-C	4.26769	0.8	-0.27	146.3	C2'-endo	3	-0.13	not measured	38.7596	C
ETS	seq_2	B	-4.5	T-T	4.30841	0.9	-0.18	140.9	C1'-exo	4	-0.23	not measured	38.3013	T
ETS	seq_2	B	-3.5	C-T	4.53038	0.1	0.21	141.7	C1'-exo	3	-0.81	not measured	35.3504	T
ETS	seq_2	B	-0.5	C-C	4.16191	0.3	-0.42	136.3	C1'-exo	6	-0.73	not measured	32.4326	C
ETS	seq_2	B	0.5	T-C	3.88458	0.8	-0.31	135.6	C1'-exo	13	-0.62	not measured	29.2115	C
ETS	seq_2	B	1.5	T-T	4.04951	1	-0.38	136.9	C1'-exo	11	-0.47	not measured	32.4281	T
ETS	seq_2	B	2.5	C-T	4.49514	0	0.35	141.5	C1'-exo	7	-1.08	not measured	27.3506	T
ETS	seq_2	B	3.5	C-C	4.46743	0	0.51	143.5	C1'-exo	9	-1.34	not measured	24.8884	C
ETS	seq_2	B	4.5	C-C	4.24763	0	0.09	141	C1'-exo	4	-1.26	not measured	29.392	C
ETS	seq_2	B	5.5	T-C	4.029	0.8	-0.4	139.3	C1'-exo	6	-0.5	not measured	33.9605	C
ETS	seq_2	B	6.5	T-T	4.3595	0.7	-0.21	142.6	C1'-exo	6	-0.29	not measured	37.2993	T
ETS	seq_20	B	-7.5	C-T	4.37133	0.1	0.08	142.2	C1'-exo	3	-1.02	not measured	32.6948	T
ETS	seq_20	B	-6.5	T-C	4.07524	0.3	-0.12	142	C1'-exo	9	-0.71	not measured	30.8358	C
ETS	seq_20	B	-5.5	T-T	4.19934	0.6	-0.3	143	C1'-exo	6	-0.55	not measured	35.0551	T
ETS	seq_20	B	-4.5	C-T	4.62528	0	0.4	145.3	C2'-endo	2	-1.11	not measured	31.8619	T
ETS	seq_20	B	-3.5	C-C	4.35737	0	0.3	145.9	C2'-endo	7	-1.35	not measured	29.1123	C
ETS	seq_20	B	-2.5	T-C	4.00209	0.7	-0.55	143.3	C1'-exo	6	-0.68	not measured	35.5315	C
ETS	seq_20	B	-1.5	C-T	4.46953	0.1	0.14	146.4	C2'-endo	4	-0.93	not measured	33.5814	T
ETS	seq_20	B	-0.5	C-C	4.32814	0	0.3	146.1	C2'-endo	7	-1.25	not measured	26.7552	C
ETS	seq_20	B	0.5	T-C	3.96648	0.4	-0.3	142.8	C1'-exo	9	-0.85	not measured	31.1134	C
ETS	seq_20	B	1.5	T-T	4.23172	0.6	-0.3	143.5	C1'-exo	5	-0.58	not measured	36.3459	T
ETS	seq_20	B	2.5	C-T	4.70679	0	0.35	146.2	C2'-endo	7	-1.12	not measured	34.2682	T
ETS	seq_20	B	3.5	C-C	4.5427	0	0.29	148.1	C2'-endo	5	-1.11	not measured	34.6073	C
ETS	seq_20	B	4.5	T-C	4.26192	0.3	-0.27	146.7	C2'-endo	1	-0.71	not measured	37.203	C
ETS	seq_20	A	6.5	C-T	4.5875	0	-0.22	147.5	C2'-endo	5	-1.1	not measured	35.3025	C
ETS	seq_20	A	7.5	T-T	4.37692	0.4	0.14	144.3	C2'-endo	4	-0.61	not measured	36.2192	T
ETS	seq_21	A	-7.5	T-T	4.22073	0.5	0.25	154.6	C2'-endo	4	-0.53	not measured	38.6901	T
ETS	seq_21	A	-6.5	T-C	4.20976	0.1	0.14	153.3	C2'-endo	3	-0.46	not measured	38.7881	T
ETS	seq_21	A	-5.5	C-C	4.59515	0	-0.36	158.1	C2'-endo	4	-0.69	not measured	37.6917	C
ETS	seq_21	B	-3.5	C-C	4.6165	0	0.23	157.6	C2'-endo	6	-0.96	not measured	36.9242	C
ETS	seq_21	B	-0.5	C-C	4.44437	0	0.24	159.7	C2'-endo	2	-0.81	not measured	36.7259	C
ETS	seq_21	B	0.5	T-C	4.14493	0.2	-0.23	158.6	C2'-endo	4	-0.44	not measured	39.281	C
ETS	seq_21	B	1.5	T-T	4.25108	0.4	-0.25	155	C2'-endo	4	-0.59	not measured	39.6963	T
ETS	seq_21	B	2.5	C-T	4.53717	0	0.23	154.9	C2'-endo	6	-1.04	not measured	36.22	T
ETS	seq_21	B	3.5	T-C	4.1844	0.2	-0.16	157.9	C2'-endo	2	-0.62	not measured	38.8875	C
ETS	seq_21	B	4.5	T-T	4.24658	0.5	-0.35	153.9	C2'-endo	4	-0.63	not measured	39.7169	T
ETS	seq_21	B	5.5	C-T	4.50226	0	0.18	154.2	C2'-endo	5	-0.97	not measured	37.077	T
ETS	seq_21	B	6.5	T-C	4.21873	0.2	-0.19	158.1	C2'-endo	3	-0.48	not measured	40.2946	C
ETS	seq_21	B	7.5	T-T	4.31443	0.4	-0.23	154.8	C2'-endo	3	-0.52	not measured	39.6858	T
ETS	seq_22	B	-6.5	C-C	4.70775	0.1	0.12	169	C2'-endo	3	0.54	not measured	44.5047	C
ETS	seq_22	B	-5.5	T-C	4.38995	0.5	-0.13	167	C2'-endo	1	0.13	not measured	41.0963	C
ETS	seq_22	B	-4.5	T-T	4.43028	0.5	-0.01	160.8	C2'-endo	4	-0.22	not measured	39.4902	T
ETS	seq_22	B	-3.5	C-T	4.52031	0.2	0.19	159.6	C2'-endo	6	-0.5	not measured	38.729	T
ETS	seq_22	B	-0.5	C-C	4.49168	0.2	0.09	166	C2'-endo	2	0.12	not measured	39.7634	C
ETS	seq_22	B	0.5	T-C	4.28195	0.5	-0.21	163.5	C2'-endo	2	-0.03	not measured	39.795	C
ETS	seq_22	B	1.5	T-T	4.32023	0.6	-0.07	158.4	C2'-endo	4	-0.28	not measured	38.1495	T
ETS	seq_22	B	2.5	C-T	4.44157	0.3	0.17	160.4	C2'-endo	4	-0.39	not measured	38.8708	T
ETS	seq_22	B	3.5	T-C	4.26255	0.5	-0.15	161.9	C2'-endo	2	-0.13	not measured	39.8667	C
ETS	seq_22	B	4.5	T-T	4.24154	0.9	-0.22	156.8	C2'-endo	4	-0.19	not measured	39.3789	T
ETS	seq_22	B	5.5	C-T	4.51684	0.2	0.25	160.5	C2'-endo	4	-0.28	not measured	38.8254	T
ETS	seq_22	B	6.5	C-C	4.42528	0.2	0.02	163.6	C2'-endo	1	-0.23	not measured	38.7009	C
ETS	seq_22	B	7.5	C-C	4.42524	0.4	-0.11	163.7	C2'-endo	3	-0.02	not measured	39.999	C
ETS	seq_23	B	-6.5	C-C	4.5111	0.1	0.2	160.6	C2'-endo	2	-0.18	not measured	38.5939	C
ETS	seq_23	B	-5.5	T-C	4.32352	0.4	-0.13	157	C2'-endo	2	-0.18	not measured	39.3955	C
ETS	seq_23	B	-4.5	T-T	4.3586	0.6	-0.08	150.2	C2'-endo	5	-0.49	not measured	38.2988	T
ETS	seq_23	B	-3.5	C-T	4.48255	0.2	0.14	149.2	C2'-endo	7	-0.78	not measured	37.3611	T
ETS	seq_23	B	-0.5	C-C	4.55186	0	0.21	158.8	C2'-endo	3	-0.26	not measured	39.0742	C
ETS	seq_23	B	0.5	T-C	4.27262	0.4	-0.17	154.8	C2'-endo	2	-0.34	not measured	37.8806	C
ETS	seq_23	B	1.5	T-T	4.34633	0.5	-0.09	149.4	C2'-endo	5	-0.59	not measured	37.9072	T
ETS	seq_23	B	2.5	C-T	4.46724	0.2	0.16	148.6	C2'-endo	5	-0.84	not measured	36.747	T
ETS	seq_23	B	3.5	T-C	4.24885	0.4	-0.12	150.8	C2'-endo	1	-0.58	not measured	36.1291	C
ETS	seq_23	B	4.5	C-T	4.5571	0.1	0.15	152	C2'-endo	5	-0.8	not measured	37.105	T
ETS	seq_23	B	7.5	C-T	4.54468	0.2	0.02	150.6	C2'-endo	6	-0.56	not measured	37.69	T
ETS	seq_24	B	-6.5	C-C	4.68214	0.1	0.18	159.6	C2'-endo	4	0.26	not measured	41.6802	C
ETS	seq_24	B	-5.5	T-C	4.30002	0.6	-0.16	153.2	C2'-endo	2	-0.12	not measured	39.746	C
ETS	seq_24	B	-4.5	T-T	4.31446	0.6	-0.08	145.5	C2'-endo	4	-0.43	not measured	37.3843	T
ETS	seq_24	B	-3.5	C-T	4.47208	0.1	0.22	144.2	C2'-endo	4	-0.91	not measured	35.9282	T
ETS	seq_24	B	-0.5	C-C	4.41802	0	0.37	144	C2'-endo	1	-0.99	not measured	27.92	C
ETS	seq_24	B	0.5	T-C	4.05412	1.2	-0.64	143.3	C1'-exo	5	-0.07	not measured	39.2161	C
ETS	seq_24	B	1.5	T-T	4.20376	0.8	-0.21	144	C2'-endo	5	-0.37	not measured	36.7998	T
ETS	seq_24	B	2.5	C-T	4.39978	0.2	0.21	145	C2'-endo	3	-0.77	not measured	35.4443	T
ETS	seq_24	B	3.5	T-C	4.26971	0.3	-0.06	148	C2'-endo	0	-0.57	not measured	37.8166	C
ETS	seq_24	A	5.5	C-T	4.50201	0.1	-0.25	144.2	C2'-endo	4	-0.89	not measured	34.2632	C
ETS	seq_25	B	-7.5	C-T	4.40009	0.3	0.09	157.9	C2'-endo	2	-0.63	not measured	36.7564	T
ETS	seq_25	B	-6.5	C-C	4.37786	0	0.14	162.3	C2'-endo	1	-0.49	not measured	37.9726	C
ETS	seq_25	A	-2.5	C-C	4.35744	0.1	-0.06	162.7	C2'-endo	1	-0.51	not measured	37.2481	C
ETS	seq_25	B	-0.5	C-C	4.48179	0.1	0.15	164.3	C2'-endo	2	-0.31	not measured	40.1744	C
ETS	seq_25	B	0.5	T-C	4.17714	0.6	-0.34	159.6	C2'-endo	2	-0.23	not measured	39.1195	C
ETS	seq_25	B	1.5	T-T	4.25753	0.7	-0.17	155.2	C2'-endo	3	-0.35	not measured	38.8166	T
ETS	seq_25	B	2.5	C-T	4.45128	0.2	0.18	156.7	C2'-endo	3	-0.6	not measured	37.0727	T
ETS	seq_25	B	3.5	T-C	4.23687	0.3	-0.13	159.4	C2'-endo	2	-0.42	not measured	37.2591	C
ETS	seq_25	B	4.5	C-T	4.38509	0.3	0.01	156.6	C2'-endo	3	-0.72	not measured	37.7901	T
ETS	seq_25	B	5.5	C-C	4.39065	0.1	0.1	160.3	C2'-endo	2	-0.62	not measured	37.13	C
ETS	seq_25	B	6.5	C-C	4.32017	0.2	-0.03	158.7	C2'-endo	2	-0.68	not measured	36.4598	C
ETS	seq_26	B	-7.5	C-T	4.63524	0	0.21	161.2	C2'-endo	5	-0.51	not measured	39.6214	T
ETS	seq_26	B	-6.5	C-C	4.60011	0	0.31	166	C2'-endo	3	-0.46	not measured	38.7352	C
ETS	seq_26	B	-5.5	T-C	4.42654	0	-0.07	164.1	C2'-endo	2	-0.47	not measured	38.6245	C
ETS	seq_26	A	-3.5	C-C	4.63684	0	-0.37	159.1	C2'-endo	5	-0.99	not measured	34.7214	C
ETS	seq_26	A	-2.5	C-C	4.78605	0	-0.36	163.2	C2'-endo	5	-0.65	not measured	37.5992	C
ETS	seq_26	B	-0.5	C-C	4.50343	0	0.21	163	C2'-endo	4	-0.83	not measured	35.1282	C
ETS	seq_26	B	0.5	T-C	4.07992	0.3	-0.36	158.4	C2'-endo	7	-0.5	not measured	36.5841	C
ETS	seq_26	B	1.5	T-T	4.21014	0.5	-0.31	156	C2'-endo	3	-0.46	not measured	38.5174	T
ETS	seq_26	B	2.5	C-T	4.53963	0	0.23	157.6	C2'-endo	4	-0.72	not measured	35.0732	T
ETS	seq_26	B	3.5	T-C	4.20785	0.2	-0.16	160.6	C2'-endo	5	-0.41	not measured	38.4138	C
ETS	seq_26	B	4.5	C-T	4.43339	0.2	-0.11	158.7	C2'-endo	5	-0.63	not measured	40.421	T
ETS	seq_27	B	-6.5	C-C	4.57547	0	0.13	158.6	C2'-endo	2	-0.44	not measured	37.4203	C
ETS	seq_27	B	-5.5	C-C	4.46723	0.1	-0.01	157	C2'-endo	1	-0.38	not measured	38.1493	C
ETS	seq_27	B	-4.5	T-C	4.30014	0.3	-0.19	156.6	C2'-endo	3	-0.46	not measured	37.422	C
ETS	seq_27	A	-2.5	C-C	4.55663	0	-0.31	154.1	C2'-endo	5	-1.29	not measured	30.8881	C
ETS	seq_27	B	-0.5	C-C	4.53115	0	0.19	161.2	C2'-endo	1	-0.39	not measured	38.5275	C
ETS	seq_27	B	0.5	T-C	4.21313	0.4	-0.25	157.3	C2'-endo	5	-0.28	not measured	39.4104	C
ETS	seq_27	B	1.5	T-T	4.33427	0.5	-0.2	153.5	C2'-endo	3	-0.41	not measured	38.9443	T
ETS	seq_27	B	2.5	C-T	4.60631	0	0.24	153.8	C2'-endo	5	-0.71	not measured	37.7492	T
ETS	seq_27	B	3.5	T-C	4.40392	0.1	-0.05	157	C2'-endo	2	-0.52	not measured	38.3261	C
ETS	seq_27	B	4.5	C-T	4.71301	0	0.17	154.7	C2'-endo	6	-0.94	not measured	37.1743	T
ETS	seq_27	B	5.5	C-C	4.57046	0	0.15	155.1	C2'-endo	4	-0.95	not measured	35.2433	C
ETS	seq_27	B	6.5	C-C	4.38169	0.1	-0.06	153.7	C2'-endo	1	-0.69	not measured	36.1643	C
ETS	seq_27	B	7.5	T-C	4.2649	0.3	-0.28	155.5	C2'-endo	4	-0.35	not measured	36.9949	C
ETS	seq_28	B	-7.5	C-T	4.45832	0.3	0.03	153.7	C2'-endo	4	-0.52	not measured	38.4598	T
ETS	seq_28	B	-6.5	C-C	4.36196	0.1	0.04	157.8	C2'-endo	2	-0.34	not measured	39.78	C
ETS	seq_28	B	-5.5	T-C	4.37834	0.3	-0.18	160.1	C2'-endo	1	-0.21	not measured	41.6293	C
ETS	seq_28	B	-0.5	C-C	4.45536	0.1	0.07	157.4	C2'-endo	2	-0.51	not measured	38.2108	C
ETS	seq_28	B	0.5	T-C	4.18729	0.4	-0.23	154.8	C2'-endo	4	-0.41	not measured	37.5801	C
ETS	seq_28	B	1.5	T-T	4.34645	0.5	-0.15	153	C2'-endo	3	-0.47	not measured	38.6543	T
ETS	seq_28	B	2.5	C-T	4.60156	0.1	0.24	154	C2'-endo	6	-0.68	not measured	37.9527	T
ETS	seq_28	B	3.5	T-C	4.45827	0.1	0	157.9	C2'-endo	2	-0.46	not measured	39.4214	C
ETS	seq_28	B	4.5	C-T	4.66933	0	0.17	154.1	C2'-endo	8	-0.89	not measured	37.7821	T
ETS	seq_28	B	5.5	C-C	4.55221	0	0.31	155.9	C2'-endo	4	-0.92	not measured	35.5344	C
ETS	seq_28	B	6.5	T-C	4.21477	0.4	-0.28	152.3	C2'-endo	2	-0.63	not measured	35.3462	C
ETS	seq_28	B	7.5	C-T	4.44822	0.3	-0.09	151.1	C2'-endo	5	-0.67	not measured	37.2591	T
ETS	seq_29	B	-7.5	C-C	4.45679	0.3	-0.1	155.9	C2'-endo	3	-0.06	not measured	37.1307	C
ETS	seq_29	B	-6.5	T-C	4.25957	0.3	-0.19	154.1	C2'-endo	3	-0.46	not measured	36.1864	C
ETS	seq_29	B	-5.5	T-T	4.33059	0.5	-0.19	146.3	C2'-endo	3	-0.56	not measured	36.7898	T
ETS	seq_29	A	-3.5	C-C	4.41894	0	-0.01	145	C2'-endo	6	-1.42	not measured	30.4222	C
ETS	seq_29	B	-1.5	C-T	4.84598	0	0.54	151.3	C2'-endo	6	-1.06	not measured	32.6076	T
ETS	seq_29	B	-0.5	C-C	4.42138	0	0.16	148.7	C2'-endo	5	-1.25	not measured	31.0052	C
ETS	seq_29	B	0.5	T-C	3.94675	0.8	-0.53	142.3	C1'-exo	6	-0.7	not measured	34.2374	C
ETS	seq_29	B	1.5	T-T	4.15152	0.8	-0.26	144.3	C2'-endo	6	-0.48	not measured	35.2551	T
ETS	seq_29	B	2.5	C-T	4.44038	0.1	0.31	147.6	C2'-endo	3	-0.86	not measured	31.3681	T
ETS	seq_29	B	3.5	T-C	4.17321	0.4	-0.24	148.4	C2'-endo	4	-0.54	not measured	35.473	C
ETS	seq_29	B	4.5	C-T	4.61835	0	0.31	152.1	C2'-endo	5	-0.86	not measured	36.1612	T
ETS	seq_29	B	5.5	C-C	4.3701	0.1	0.02	152.8	C2'-endo	3	-0.88	not measured	36.1738	C
ETS	seq_29	B	6.5	T-C	4.17633	0.6	-0.4	148.5	C2'-endo	2	-0.49	not measured	37.3656	C
ETS	seq_3	A	-7.5	C-C	4.25267	0.1	0.23	156.3	C2'-endo	2	-0.91	not measured	36.4366	C
ETS	seq_3	B	-5.5	C-T	4.9234	0	0.31	154.4	C2'-endo	12	-1.31	not measured	36.2642	T
ETS	seq_3	B	-4.5	C-C	4.70054	0	0.35	156.3	C2'-endo	7	-1.26	not measured	34.4593	C
ETS	seq_3	B	-3.5	C-C	4.55908	0	0.16	157.5	C2'-endo	5	-1.1	not measured	36.7064	C
ETS	seq_3	B	-0.5	C-C	4.66546	0	0.4	158.1	C2'-endo	6	-1.46	not measured	32.419	C
ETS	seq_3	B	0.5	T-C	4.12001	0.2	-0.38	153.9	C2'-endo	6	-0.92	not measured	35.0451	C
ETS	seq_3	B	1.5	T-T	4.20368	0.5	-0.47	151.2	C2'-endo	3	-0.7	not measured	37.8237	T
ETS	seq_3	B	2.5	C-T	4.78522	0	0.35	155.6	C2'-endo	6	-1.08	not measured	35.0453	T
ETS	seq_3	B	3.5	C-C	4.576	0	0.39	158.1	C2'-endo	7	-1.32	not measured	32.941	C
ETS	seq_3	B	4.5	T-C	4.21149	0.1	-0.25	155	C2'-endo	3	-0.91	not measured	36.6958	C
ETS	seq_30	B	-7.5	C-T	4.4283	0.4	0.15	149.8	C2'-endo	4	-0.39	not measured	37.8257	T
ETS	seq_30	B	-6.5	C-C	4.45869	0.1	0.17	156.1	C2'-endo	2	-0.27	not measured	39.3947	C
ETS	seq_30	B	-3.5	C-C	4.47394	0.2	-0.05	154.3	C2'-endo	5	-0.34	not measured	39.032	C
ETS	seq_30	B	-0.5	C-C	4.48997	0.2	0.05	156.4	C2'-endo	3	-0.07	not measured	40.9875	C
ETS	seq_30	B	0.5	T-C	4.28865	0.6	-0.23	154.6	C2'-endo	2	-0.15	not measured	40.2688	C
ETS	seq_30	B	1.5	T-T	4.33523	0.7	-0.12	149.5	C2'-endo	5	-0.35	not measured	38.5432	T
ETS	seq_30	B	2.5	C-T	4.51475	0.2	0.24	149.1	C2'-endo	5	-0.62	not measured	36.6796	T
ETS	seq_30	B	3.5	T-C	4.28102	0.3	-0.07	150.3	C2'-endo	1	-0.51	not measured	36.3226	C
ETS	seq_30	B	4.5	C-T	4.46331	0.2	0.13	148.6	C2'-endo	5	-0.86	not measured	35.6696	T
ETS	seq_30	B	5.5	C-C	4.17442	0.5	-0.16	146.7	C2'-endo	1	-0.63	not measured	36.3409	C
ETS	seq_30	B	6.5	T-C	4.13862	0.8	-0.45	149.2	C2'-endo	4	-0.25	not measured	38.164	C
ETS	seq_30	B	7.5	C-T	4.44513	0.3	0.16	149.3	C2'-endo	4	-0.58	not measured	36.2655	T
ETS	seq_31	A	-7.5	T-C	4.23504	0.4	0.24	150.5	C2'-endo	1	-0.36	not measured	36.9504	T
ETS	seq_31	A	-6.5	C-C	4.41694	0	-0.08	147.8	C2'-endo	1	-0.63	not measured	34.3675	C
ETS	seq_31	B	-4.5	T-T	4.28041	0.6	-0.3	141.5	C1'-exo	3	-0.46	not measured	37.8351	T
ETS	seq_31	A	-2.5	C-C	4.36402	0	-0.08	147.7	C2'-endo	4	-1	not measured	33.3062	C
ETS	seq_31	B	-0.5	C-C	4.50946	0	0.21	150.6	C2'-endo	4	-1.11	not measured	31.0039	C
ETS	seq_31	B	0.5	T-C	4.04632	0.4	-0.39	147.4	C2'-endo	6	-0.63	not measured	35.0132	C
ETS	seq_31	B	1.5	T-T	4.15499	0.8	-0.43	146.7	C2'-endo	4	-0.45	not measured	37.5415	T
ETS	seq_31	B	2.5	C-T	4.58879	0	0.3	150.4	C2'-endo	4	-0.86	not measured	33.9534	T
ETS	seq_31	B	3.5	T-C	4.24636	0.2	-0.15	151.1	C2'-endo	3	-0.53	not measured	36.7174	C
ETS	seq_31	B	4.5	T-T	4.15723	1	-0.54	144.1	C2'-endo	3	-0.44	not measured	39.3792	T
ETS	seq_32	B	-6.5	C-C	4.66676	0	0.17	164.7	C2'-endo	3	0.03	not measured	41.2728	C
ETS	seq_32	B	-5.5	T-C	4.49822	0.2	-0.09	162.6	C2'-endo	2	-0.07	not measured	42.3557	C
ETS	seq_32	B	-4.5	T-T	4.47175	0.3	0.03	153.4	C2'-endo	5	-0.54	not measured	37.8564	T
ETS	seq_32	B	-3.5	T-T	4.42541	0.3	-0.01	149	C2'-endo	5	-0.72	not measured	36.2605	T
ETS	seq_32	B	-0.5	C-C	4.39445	0	0.06	153.9	C2'-endo	2	-1.11	not measured	33.8527	C
ETS	seq_32	B	0.5	T-C	4.03954	0.7	-0.45	150.2	C2'-endo	5	-0.53	not measured	35.8937	C
ETS	seq_32	B	1.5	T-T	4.22682	0.7	-0.24	150.8	C2'-endo	5	-0.45	not measured	36.2953	T
ETS	seq_32	B	2.5	C-T	4.49827	0.1	0.25	152.7	C2'-endo	3	-0.76	not measured	35.6224	T
ETS	seq_32	B	3.5	T-C	4.32403	0.2	-0.09	156.3	C2'-endo	1	-0.56	not measured	37.9991	C
ETS	seq_32	B	6.5	T-C	4.30594	0.3	-0.2	155.1	C2'-endo	1	-0.51	not measured	37.3424	C
ETS	seq_33	B	-7.5	C-C	4.53262	0.1	0.03	157.3	C2'-endo	2	-0.15	not measured	42.001	C
ETS	seq_33	B	-6.5	C-C	4.48286	0	0.11	155.4	C2'-endo	1	-0.32	not measured	39.7943	C
ETS	seq_33	A	-2.5	C-C	4.38914	0.1	-0.09	153.4	C2'-endo	1	-0.55	not measured	38.0778	C
ETS	seq_33	B	-0.5	C-C	4.40838	0.1	0.06	156.2	C2'-endo	1	-0.39	not measured	40.564	C
ETS	seq_33	B	0.5	T-C	4.14185	0.6	-0.32	152.9	C2'-endo	4	-0.26	not measured	40.2112	C
ETS	seq_33	B	1.5	T-T	4.22435	0.7	-0.23	149.4	C2'-endo	5	-0.35	not measured	38.7079	T
ETS	seq_33	B	2.5	C-T	4.41031	0.2	0.1	149.4	C2'-endo	3	-0.62	not measured	38.0257	T
ETS	seq_33	B	3.5	T-C	4.26044	0.2	-0.08	153.5	C2'-endo	2	-0.45	not measured	39.5471	C
ETS	seq_34	B	-7.5	C-C	4.4309	0	0.32	153.5	C2'-endo	3	-0.86	not measured	33.0416	C
ETS	seq_34	B	-6.5	T-C	4.21726	0.3	-0.11	152	C2'-endo	5	-0.58	not measured	35.7968	C
ETS	seq_34	B	-5.5	T-T	4.33668	0.4	-0.09	147.7	C2'-endo	4	-0.64	not measured	36.0351	T
ETS	seq_34	B	-4.5	C-T	4.59361	0	0.21	149.1	C2'-endo	6	-1.02	not measured	35.9586	T
ETS	seq_34	B	-1.5	C-T	4.64974	0	0.32	148.9	C2'-endo	6	-0.82	not measured	35.5854	T
ETS	seq_34	B	-0.5	C-C	4.44844	0	0.25	153.6	C2'-endo	2	-0.86	not measured	35.7031	C
ETS	seq_34	B	0.5	T-C	4.11422	0.5	-0.32	150.5	C2'-endo	3	-0.52	not measured	38.088	C
ETS	seq_34	B	1.5	T-T	4.25919	0.6	-0.15	148.1	C2'-endo	5	-0.48	not measured	37.0071	T
ETS	seq_34	B	2.5	C-T	4.4538	0.1	0.23	148	C2'-endo	4	-0.8	not measured	34.8789	T
ETS	seq_34	B	3.5	T-C	4.25186	0.2	-0.1	151.3	C2'-endo	3	-0.52	not measured	37.249	C
ETS	seq_34	B	4.5	C-T	4.58686	0	0.3	150.1	C2'-endo	4	-0.97	not measured	34.6859	T
ETS	seq_34	B	5.5	C-C	4.47256	0	0.27	152.6	C2'-endo	4	-1.1	not measured	34.9659	C
ETS	seq_34	A	7.5	C-C	4.44561	0	-0.26	155.8	C2'-endo	2	-0.98	not measured	33.3035	C
ETS	seq_35	B	-6.5	T-T	4.30909	0.6	-0.16	138.8	C1'-exo	5	-0.43	not measured	36.362	T
ETS	seq_35	B	-5.5	T-T	4.47305	0.2	0.04	142.3	C1'-exo	5	-0.72	not measured	36.5931	T
ETS	seq_35	A	-3.5	C-C	4.31164	0.1	0	143.5	C1'-exo	2	-0.98	not measured	34.9494	C
ETS	seq_35	A	-2.5	C-C	4.63716	0	-0.39	144.5	C2'-endo	3	-0.74	not measured	35.8272	C
ETS	seq_35	B	-0.5	C-C	4.57029	0	0.2	152.1	C2'-endo	1	-0.45	not measured	37.9758	C
ETS	seq_35	B	0.5	T-C	4.1076	0.5	-0.34	145.6	C2'-endo	6	-0.49	not measured	35.1555	C
ETS	seq_35	B	1.5	T-T	4.25932	0.6	-0.18	142.7	C1'-exo	4	-0.52	not measured	36.2616	T
ETS	seq_35	B	2.5	C-T	4.44471	0.1	0.18	140.4	C1'-exo	3	-0.96	not measured	33.7634	T
ETS	seq_35	B	3.5	T-C	4.31794	0.1	-0.01	144.1	C2'-endo	1	-0.79	not measured	34.8724	C
ETS	seq_36	B	-5.5	T-C	4.39712	0.2	-0.16	145.1	C2'-endo	2	-0.6	not measured	37.2468	C
ETS	seq_36	A	-3.5	T-C	4.25631	0.2	0.11	139.3	C1'-exo	4	-0.68	not measured	32.8173	T
ETS	seq_36	A	-2.5	C-C	4.5392	0	-0.11	144.2	C2'-endo	2	-0.66	not measured	34.8429	C
ETS	seq_36	B	-0.5	C-C	4.57943	0	0.24	147.6	C2'-endo	3	-0.83	not measured	33.9159	C
ETS	seq_36	B	0.5	T-C	4.16513	0.2	-0.24	142.6	C1'-exo	4	-0.75	not measured	32.7739	C
ETS	seq_36	B	1.5	T-T	4.26376	0.5	-0.31	142.4	C1'-exo	2	-0.72	not measured	35.6973	T
ETS	seq_36	B	2.5	C-T	4.49797	0	0.16	141.1	C1'-exo	3	-0.99	not measured	33.298	T
ETS	seq_36	B	3.5	T-C	4.1628	0.3	-0.23	142.3	C1'-exo	4	-0.73	not measured	34.5901	C
ETS	seq_36	B	4.5	C-T	4.44835	0.3	-0.13	145.8	C2'-endo	5	-0.84	not measured	38.2191	T
ETS	seq_36	B	5.5	C-C	4.42566	0.1	-0.09	148.1	C2'-endo	3	-0.59	not measured	38.8751	C
ETS	seq_36	B	6.5	C-C	4.46695	0.1	-0.09	149.3	C2'-endo	3	-0.42	not measured	39.1232	C
ETS	seq_37	A	-7.5	C-C	4.4195	0.2	0.06	152.4	C2'-endo	3	-0.28	not measured	39.9335	C
ETS	seq_37	B	-5.5	T-T	4.40128	0.5	-0.24	146.4	C2'-endo	5	-0.43	not measured	39.2867	T
ETS	seq_37	A	-3.5	C-C	4.32809	0	-0.12	145.5	C2'-endo	4	-1.1	not measured	32.5252	C
ETS	seq_37	A	-2.5	C-C	4.46631	0	-0.23	149.5	C2'-endo	5	-1	not measured	32.0047	C
ETS	seq_37	B	-0.5	C-C	4.47718	0	0.23	151	C2'-endo	2	-1	not measured	32.4419	C
ETS	seq_37	B	0.5	T-C	3.98661	0.7	-0.59	144.7	C2'-endo	6	-0.54	not measured	36.05	C
ETS	seq_37	B	1.5	T-T	4.19753	0.6	-0.28	146.1	C2'-endo	6	-0.47	not measured	36.097	T
ETS	seq_37	B	2.5	C-T	4.41793	0.1	0.2	146.3	C2'-endo	2	-0.94	not measured	33.4374	T
ETS	seq_37	B	3.5	T-C	4.11363	0.3	-0.12	148.2	C2'-endo	6	-0.65	not measured	35.031	C
ETS	seq_37	B	4.5	T-T	4.20264	0.8	-0.3	145.2	C2'-endo	4	-0.57	not measured	38.0381	T
ETS	seq_37	B	7.5	C-T	4.45215	0.3	-0.07	143.7	C1'-exo	4	-0.79	not measured	36.1434	T
ETS	seq_38	B	-7.5	C-C	4.64219	0	0.29	162.1	C2'-endo	1	-0.22	not measured	38.7657	C
ETS	seq_38	B	-6.5	T-C	4.24152	0.4	-0.19	155.1	C2'-endo	4	-0.28	not measured	35.7618	C
ETS	seq_38	B	-5.5	T-T	4.22208	0.8	-0.24	143.9	C1'-exo	5	-0.34	not measured	35.607	T
ETS	seq_38	A	-3.5	C-C	4.34917	0	0.01	143.5	C1'-exo	6	-1.37	not measured	31.5334	C
ETS	seq_38	B	-1.5	C-T	4.78877	0	0.59	151.5	C2'-endo	5	-1.14	not measured	29.9477	T
ETS	seq_38	B	-0.5	C-C	4.38507	0	0.2	145.8	C2'-endo	4	-1.28	not measured	29.572	C
ETS	seq_38	B	0.5	T-C	3.93462	0.8	-0.44	143.9	C1'-exo	6	-0.63	not measured	33.6903	C
ETS	seq_38	B	1.5	T-T	4.19354	0.9	-0.28	146.9	C2'-endo	6	-0.21	not measured	38.3616	T
ETS	seq_38	B	2.5	C-T	4.56592	0	0.45	150.3	C2'-endo	3	-0.87	not measured	32.7189	T
ETS	seq_38	B	3.5	T-C	4.18459	0.3	-0.11	147.1	C2'-endo	3	-0.79	not measured	33.5076	C
ETS	seq_38	A	7.5	C-C	4.49747	0.2	-0.05	159.3	C2'-endo	2	-0.3	not measured	37.2709	C
ETS	seq_39	B	-7.5	C-C	4.37326	0	0.19	147.2	C2'-endo	4	-1.1	not measured	31.5266	C
ETS	seq_39	B	-6.5	C-C	4.49816	0	0.26	152.8	C2'-endo	2	-1.03	not measured	33.0933	C
ETS	seq_39	B	-5.5	C-C	4.60385	0	0.36	153.8	C2'-endo	4	-1.12	not measured	34.2714	C
ETS	seq_39	B	-4.5	C-C	4.32858	0	0.07	147.9	C2'-endo	1	-1.07	not measured	33.3572	C
ETS	seq_39	B	-3.5	T-C	4.18238	0.4	-0.27	147.5	C2'-endo	3	-0.58	not measured	36.1455	C
ETS	seq_39	B	-0.5	C-C	4.48097	0	0.25	149	C2'-endo	4	-1.42	not measured	31.9449	C
ETS	seq_39	B	0.5	T-C	4.05865	0.6	-0.38	144.6	C2'-endo	5	-0.76	not measured	34.4686	C
ETS	seq_39	B	1.5	T-T	4.23347	0.7	-0.29	145	C2'-endo	5	-0.61	not measured	35.6453	T
ETS	seq_39	B	2.5	C-T	4.58462	0	0.3	147.4	C2'-endo	4	-0.98	not measured	34.1002	T
ETS	seq_39	B	3.5	T-C	4.37404	0.1	0.05	148.8	C2'-endo	2	-0.85	not measured	33.6985	C
ETS	seq_39	B	4.5	C-T	4.81451	0	0.43	148.4	C2'-endo	6	-1.36	not measured	32.9972	T
ETS	seq_39	B	5.5	C-C	4.55482	0	0.31	149.2	C2'-endo	6	-1.49	not measured	31.7956	C
ETS	seq_39	B	6.5	T-C	4.14265	0.3	-0.31	145.4	C2'-endo	4	-0.85	not measured	32.9759	C
ETS	seq_39	B	7.5	T-T	4.33258	0.4	-0.15	145.3	C2'-endo	5	-0.64	not measured	34.5892	T
ETS	seq_4	A	-7.5	C-C	4.35735	0	0.1	151.2	C2'-endo	2	-1.16	not measured	32.4647	C
ETS	seq_4	A	-6.5	C-C	4.69313	0	-0.37	140.5	C1'-exo	5	-1.3	not measured	31.7955	C
ETS	seq_4	B	-4.5	C-T	4.65294	0	0.21	140.9	C1'-exo	8	-1.31	not measured	34.6927	T
ETS	seq_4	A	-2.5	T-C	4.41731	0	-0.05	142.9	C1'-exo	2	-1.07	not measured	33.8326	T
ETS	seq_4	B	-0.5	C-C	4.54683	0	0.36	146.8	C2'-endo	7	-1.51	not measured	32.4484	C
ETS	seq_4	B	0.5	T-C	4.06366	0.5	-0.35	143.7	C1'-exo	5	-0.76	not measured	35.8285	C
ETS	seq_4	B	1.5	T-T	4.2339	0.6	-0.26	142.9	C1'-exo	5	-0.72	not measured	34.7148	T
ETS	seq_4	B	2.5	C-T	4.70611	0	0.46	144.1	C2'-endo	3	-1.27	not measured	31.6164	T
ETS	seq_4	B	3.5	C-C	4.41989	0	0.31	144.9	C2'-endo	6	-1.41	not measured	30.5498	C
ETS	seq_4	B	4.5	T-C	4.08423	0.5	-0.38	143.9	C1'-exo	3	-0.87	not measured	35.9635	C
ETS	seq_40	B	-7.5	C-T	4.64983	0	0.28	149.9	C2'-endo	4	-1.04	not measured	33.3433	T
ETS	seq_40	B	-6.5	C-C	4.46867	0	0.32	154.5	C2'-endo	2	-0.93	not measured	33.0102	C
ETS	seq_40	B	-5.5	T-C	4.19711	0.4	-0.3	152.7	C2'-endo	4	-0.44	not measured	37.744	C
ETS	seq_40	B	-4.5	T-T	4.405	0.3	-0.06	151.4	C2'-endo	4	-0.7	not measured	36.756	T
ETS	seq_40	B	-1.5	C-T	4.5991	0	0.07	147.1	C2'-endo	6	-1.34	not measured	35.0093	T
ETS	seq_40	B	-0.5	C-C	4.38236	0	0.22	150.4	C2'-endo	3	-1.18	not measured	32.0911	C
ETS	seq_40	B	0.5	T-C	4.09359	0.5	-0.41	149.2	C2'-endo	4	-0.63	not measured	36.1927	C
ETS	seq_40	B	1.5	T-T	4.31048	0.4	-0.18	147.9	C2'-endo	4	-0.63	not measured	36.2433	T
ETS	seq_40	B	2.5	C-T	4.60561	0	0.29	150.2	C2'-endo	5	-1	not measured	33.9357	T
ETS	seq_40	B	3.5	T-C	4.30438	0.2	-0.19	151	C2'-endo	1	-0.65	not measured	36.2721	C
ETS	seq_40	B	4.5	C-T	4.61475	0	0.19	151.2	C2'-endo	6	-1.07	not measured	36.281	T
ETS	seq_40	A	6.5	C-C	4.75811	0	-0.35	157.4	C2'-endo	9	-0.99	not measured	37.2828	C
ETS	seq_40	A	7.5	C-C	4.95505	0	-0.37	159.3	C2'-endo	7	-0.34	not measured	38.2686	C
ETS	seq_41	A	-7.5	T-T	4.26725	0.6	0.24	145.5	C2'-endo	5	-0.46	not measured	37.4849	T
ETS	seq_41	A	-6.5	T-C	4.1293	0.5	0.33	146.4	C2'-endo	2	-0.43	not measured	36.7739	T
ETS	seq_41	A	-5.5	C-C	4.56051	0	-0.21	147	C2'-endo	5	-0.74	not measured	36.9182	C
ETS	seq_41	A	-2.5	C-C	4.31067	0	-0.12	151.2	C2'-endo	3	-1.15	not measured	28.403	C
ETS	seq_41	B	-0.5	C-C	4.40825	0	0.17	148.4	C2'-endo	2	-0.97	not measured	33.299	C
ETS	seq_41	B	0.5	T-C	4.09435	0.7	-0.48	148.4	C2'-endo	4	-0.32	not measured	39.3008	C
ETS	seq_41	B	1.5	T-T	4.34269	0.5	-0.15	148.5	C2'-endo	3	-0.47	not measured	37.2951	T
ETS	seq_41	B	2.5	C-T	4.59955	0	0.3	146.5	C2'-endo	4	-1.09	not measured	34.8791	T
ETS	seq_41	A	4.5	T-C	4.4597	0	-0.1	148.8	C2'-endo	0	-0.48	not measured	38.0796	T
ETS	seq_41	B	6.5	C-T	4.62291	0	0.2	149.8	C2'-endo	7	-0.76	not measured	38.0831	T
ETS	seq_42	A	-7.5	T-T	4.27362	0.8	0.22	151.1	C2'-endo	5	-0.08	not measured	40.0018	T
ETS	seq_42	A	-6.5	T-C	4.17589	0.8	0.29	150.5	C2'-endo	3	-0.1	not measured	38.4723	T
ETS	seq_42	A	-5.5	C-C	4.48094	0.1	-0.15	152.9	C2'-endo	3	-0.11	not measured	39.3854	C
ETS	seq_42	B	-3.5	C-C	4.37564	0.2	0.04	152.9	C2'-endo	2	-0.39	not measured	36.5901	C
ETS	seq_42	B	-0.5	C-C	4.37038	0.1	0.2	153.5	C2'-endo	2	-0.41	not measured	35.258	C
ETS	seq_42	B	0.5	T-C	4.19162	0.6	-0.19	151.2	C2'-endo	3	-0.19	not measured	37.1587	C
ETS	seq_42	B	1.5	T-T	4.35652	0.5	-0.08	150.5	C2'-endo	4	-0.3	not measured	38.2988	T
ETS	seq_42	B	2.5	C-T	4.48963	0.2	0.07	151.1	C2'-endo	4	-0.76	not measured	38.3698	T
ETS	seq_43	B	-7.5	C-T	4.54668	0	0.21	112.6	C1'-exo	2	-1.01	not measured	33.7619	T
ETS	seq_43	A	-5.5	C-T	4.65862	0	-0.11	152.3	C2'-endo	8	-0.96	not measured	38.2936	C
ETS	seq_43	A	-2.5	C-C	4.37607	0	0	151.4	C2'-endo	3	-0.9	not measured	37.2732	C
ETS	seq_43	B	-0.5	C-C	4.42863	0	0.08	152.5	C2'-endo	2	-0.92	not measured	36.5471	C
ETS	seq_43	B	0.5	T-C	4.02171	0.7	-0.44	148.5	C2'-endo	6	-0.45	not measured	38.2633	C
ETS	seq_43	B	1.5	T-T	4.35222	0.3	-0.1	149.5	C2'-endo	4	-0.52	not measured	36.9969	T
ETS	seq_43	B	2.5	C-T	4.62	0	0.31	147.5	C2'-endo	5	-1.37	not measured	33.6187	T
ETS	seq_44	B	-6.5	C-C	4.63926	0	0.17	167.2	C2'-endo	5	-0.21	not measured	42.863	C
ETS	seq_44	B	-5.5	T-C	4.40156	0.3	-0.18	164	C2'-endo	0	-0.08	not measured	42.4203	C
ETS	seq_44	B	-4.5	T-T	4.36658	0.5	-0.15	157.5	C2'-endo	3	-0.38	not measured	38.7283	T
ETS	seq_44	B	-3.5	C-T	4.52907	0.1	0.12	157.6	C2'-endo	6	-0.74	not measured	37.4928	T
ETS	seq_44	B	-0.5	C-C	4.47672	0	0.1	162.2	C2'-endo	2	-0.59	not measured	38.5811	C
ETS	seq_44	B	0.5	T-C	4.15278	0.5	-0.34	159.5	C2'-endo	5	-0.25	not measured	39.2517	C
ETS	seq_44	B	1.5	T-T	4.28726	0.5	-0.19	156.4	C2'-endo	3	-0.48	not measured	37.8832	T
ETS	seq_44	B	2.5	C-T	4.50266	0.1	0.12	157.1	C2'-endo	5	-0.89	not measured	37.1339	T
ETS	seq_44	A	6.5	C-C	4.60832	0	-0.15	164.4	C2'-endo	6	-0.42	not measured	40.7841	C
ETS	seq_45	A	-7.5	T-T	4.34473	0.4	0.13	146.3	C2'-endo	4	-0.62	not measured	35.19	T
ETS	seq_45	A	-6.5	T-C	4.16428	0.5	0.31	144.3	C2'-endo	5	-0.5	not measured	35.1406	T
ETS	seq_45	A	-5.5	C-C	4.4997	0	-0.07	145.9	C2'-endo	2	-0.63	not measured	37.7105	C
ETS	seq_45	A	-2.5	C-C	4.33189	0	-0.04	150.1	C2'-endo	1	-0.86	not measured	33.6007	C
ETS	seq_45	B	-0.5	C-C	4.47429	0	0.16	149.3	C2'-endo	1	-0.89	not measured	33.4419	C
ETS	seq_45	B	0.5	T-C	4.03019	0.7	-0.51	143.7	C1'-exo	6	-0.53	not measured	35.2936	C
ETS	seq_45	B	1.5	T-T	4.27037	0.5	-0.24	144.9	C2'-endo	3	-0.59	not measured	36.0922	T
ETS	seq_45	B	2.5	C-T	4.54424	0	0.19	144.2	C2'-endo	4	-1.11	not measured	35.0948	T
ETS	seq_45	B	5.5	C-C	4.69328	0	0.25	155.5	C2'-endo	6	-0.61	not measured	40.2329	C
ETS	seq_45	A	7.5	C-C	4.46949	0	-0.19	155.9	C2'-endo	3	-0.53	not measured	35.0972	C
ETS	seq_46	A	-7.5	T-T	4.2938	0.8	0.17	158.4	C2'-endo	4	-0.12	not measured	39.9177	T
ETS	seq_46	A	-6.5	T-C	4.3261	0.5	0.12	156.2	C2'-endo	2	-0.01	not measured	39.7869	T
ETS	seq_46	A	-5.5	C-C	4.49911	0.3	0	164	C2'-endo	2	0.11	not measured	40.7636	C
ETS	seq_46	A	-2.5	C-C	4.44234	0.4	0.25	167.3	C2'-endo	2	0.28	not measured	43.8368	C
ETS	seq_46	B	-0.5	C-C	4.52809	0.1	0.06	166.7	C2'-endo	2	0.11	not measured	41.1585	C
ETS	seq_46	B	0.5	T-C	4.32115	0.4	-0.16	161.3	C2'-endo	3	0.03	not measured	39.5726	C
ETS	seq_46	B	1.5	T-T	4.29675	0.6	-0.02	155.7	C2'-endo	2	-0.35	not measured	37.0539	T
ETS	seq_46	B	2.5	C-T	4.42412	0.3	0.07	156.6	C2'-endo	3	-0.64	not measured	37.7299	T
ETS	seq_46	B	5.5	C-C	4.27531	0.4	-0.12	155.9	C2'-endo	2	-0.31	not measured	35.6689	C
ETS	seq_46	B	6.5	C-C	4.35711	0.2	0.09	160.1	C2'-endo	1	-0.35	not measured	36.1227	C
ETS	seq_46	B	7.5	C-C	4.30699	0.3	-0.07	156.7	C2'-endo	1	-0.47	not measured	35.3644	C
ETS	seq_47	B	-6.5	C-C	4.54861	0	0.24	172.2	C2'-endo	1	-0.1	not measured	38.1368	C
ETS	seq_47	B	-5.5	T-C	4.33123	0.2	-0.04	168.5	C2'-endo	4	-0.07	not measured	37.956	C
ETS	seq_47	B	-4.5	T-T	4.41144	0.4	0	164.6	C2'-endo	3	-0.37	not measured	38.1797	T
ETS	seq_47	A	-2.5	C-C	4.29949	0.1	-0.02	161.8	C2'-endo	1	-0.86	not measured	34.4483	C
ETS	seq_47	B	-0.5	C-C	4.52291	0	0.34	167.3	C2'-endo	1	-0.54	not measured	35.2428	C
ETS	seq_47	B	0.5	T-C	4.1957	0.4	-0.18	162.9	C2'-endo	4	-0.27	not measured	36.5323	C
ETS	seq_47	B	1.5	T-T	4.39736	0.4	-0.01	163.2	C2'-endo	2	-0.38	not measured	37.2581	T
ETS	seq_47	B	2.5	C-T	4.58196	0	0.23	163.6	C2'-endo	5	-0.86	not measured	37.2547	T
ETS	seq_47	B	5.5	C-C	4.44112	0.1	0.01	164.6	C2'-endo	2	-0.61	not measured	37.1271	C
ETS	seq_47	A	7.5	T-T	4.3346	0.5	0.14	165	C2'-endo	3	-0.34	not measured	37.5717	T
ETS	seq_48	A	-7.5	T-T	4.24639	0.9	0.31	141.9	C1'-exo	5	-0.38	not measured	37.6643	T
ETS	seq_48	A	-6.5	T-C	4.16981	0.6	0.3	140.7	C1'-exo	2	-0.45	not measured	35.773	T
ETS	seq_48	A	-5.5	C-C	4.5177	0.1	-0.17	140.8	C1'-exo	4	-0.47	not measured	36.5053	C
ETS	seq_48	B	-3.5	C-C	4.2816	0.4	-0.18	136.4	C1'-exo	3	-0.49	not measured	35.2555	C
ETS	seq_48	B	-0.5	C-C	4.45439	0.1	0.21	150.9	C2'-endo	2	-0.38	not measured	36.7013	C
ETS	seq_48	B	0.5	T-C	4.13712	0.7	-0.31	144.7	C2'-endo	2	-0.4	not measured	37.7843	C
ETS	seq_48	B	1.5	T-T	4.37873	0.6	-0.08	145.6	C2'-endo	5	-0.44	not measured	38.8185	T
ETS	seq_48	B	2.5	C-T	4.53447	0.2	0.16	142.8	C1'-exo	6	-0.85	not measured	37.0095	T
ETS	seq_48	B	5.5	C-C	4.33874	0.2	0.02	145	C2'-endo	1	-0.55	not measured	35.4248	C
ETS	seq_48	A	7.5	C-C	4.34525	0.1	-0.01	148.9	C2'-endo	2	-0.6	not measured	36.11	C
ETS	seq_49	B	-6.5	C-C	4.65233	0.1	0.34	156.2	C2'-endo	5	0.3	not measured	39.8246	C
ETS	seq_49	B	-5.5	T-C	4.22298	0.9	-0.34	148.3	C2'-endo	3	-0.07	not measured	38.902	C
ETS	seq_49	B	-4.5	T-T	4.33083	0.7	-0.03	142.8	C1'-exo	5	-0.36	not measured	37.8398	T
ETS	seq_49	B	-3.5	C-T	4.45718	0.3	0.15	141.9	C1'-exo	5	-0.73	not measured	36.4669	T
ETS	seq_49	B	-0.5	C-C	4.43744	0.1	0.31	151.7	C2'-endo	4	-0.12	not measured	35.9509	C
ETS	seq_49	B	0.5	T-C	4.18635	0.9	-0.41	147.7	C2'-endo	3	-0.01	not measured	40.5056	C
ETS	seq_49	B	1.5	T-T	4.33557	0.7	-0.06	145.7	C2'-endo	5	-0.3	not measured	38.8794	T
ETS	seq_49	B	2.5	C-T	4.43498	0.4	0.14	143.8	C1'-exo	4	-0.72	not measured	38.6417	T
ETS	seq_5	B	-6.5	C-C	4.59963	0	0.32	157.8	C2'-endo	3	-0.02	not measured	39.1437	C
ETS	seq_5	B	-5.5	T-C	4.32763	0.5	-0.18	153.3	C2'-endo	1	-0.15	not measured	39.7725	C
ETS	seq_5	B	-4.5	T-T	4.35483	0.8	-0.13	147	C2'-endo	5	-0.38	not measured	39.0673	T
ETS	seq_5	B	-3.5	C-T	4.4846	0.3	0.17	145.3	C2'-endo	5	-0.76	not measured	36.6952	T
ETS	seq_5	B	-0.5	C-C	4.54274	0	0.3	156.8	C2'-endo	2	-0.22	not measured	36.9298	C
ETS	seq_5	B	0.5	T-C	4.22117	0.6	-0.28	149.2	C2'-endo	3	-0.21	not measured	37.9707	C
ETS	seq_5	B	1.5	T-T	4.24897	1	-0.28	143.9	C1'-exo	4	-0.28	not measured	38.6166	T
ETS	seq_5	B	2.5	C-T	4.49298	0.2	0.28	144.2	C2'-endo	3	-0.74	not measured	35.028	T
ETS	seq_5	B	3.5	C-C	4.40348	0.1	0.1	151.4	C2'-endo	1	-0.71	not measured	37.4832	C
ETS	seq_5	B	6.5	C-C	4.47345	0.1	0.28	150.6	C2'-endo	1	-0.47	not measured	33.6701	C
ETS	seq_5	B	7.5	C-C	4.4175	0.1	0.13	147.6	C2'-endo	1	-0.7	not measured	33.2128	C
ETS	seq_50	A	-7.5	T-T	4.37493	0.5	0.12	153.7	C2'-endo	5	-0.24	not measured	39.5699	T
ETS	seq_50	A	-6.5	T-C	4.20472	0.5	0.26	156.1	C2'-endo	3	-0.14	not measured	40.7783	T
ETS	seq_50	A	-5.5	C-C	4.59204	0	-0.03	156.1	C2'-endo	7	-0.44	not measured	42.6356	C
ETS	seq_50	B	-3.5	C-C	4.37976	0	0.07	151.1	C2'-endo	1	-0.89	not measured	33.451	C
ETS	seq_50	B	-0.5	C-C	4.38509	0	0.19	154.6	C2'-endo	2	-1.23	not measured	29.8947	C
ETS	seq_50	B	0.5	T-C	4.1376	0.4	-0.27	155.8	C2'-endo	4	-0.42	not measured	38.2891	C
ETS	seq_50	B	1.5	T-T	4.4469	0.3	-0.09	155.6	C2'-endo	5	-0.42	not measured	38.0927	T
ETS	seq_50	B	2.5	C-T	4.64418	0	0.28	153.7	C2'-endo	6	-1.26	not measured	34.6349	T
ETS	seq_50	A	4.5	T-T	4.44352	0.3	0.14	154.4	C2'-endo	4	-0.54	not measured	38.0586	T
ETS	seq_50	A	7.5	C-C	4.48063	0	-0.18	157.4	C2'-endo	3	-0.95	not measured	35.8784	C
ETS	seq_51	B	-6.5	C-C	4.75698	0.1	0.09	161.5	C2'-endo	4	0.26	not measured	42.9627	C
ETS	seq_51	B	-5.5	T-C	4.31699	0.6	-0.26	154.2	C2'-endo	3	0.05	not measured	39.7083	C
ETS	seq_51	B	-4.5	T-T	4.34857	0.7	-0.11	148.7	C2'-endo	4	-0.25	not measured	38.9094	T
ETS	seq_51	A	-2.5	C-C	4.37644	0.2	0.07	145.9	C2'-endo	0	-0.5	not measured	37.2398	C
ETS	seq_51	B	-0.5	C-C	4.57544	0	0.09	154.2	C2'-endo	4	-0.56	not measured	36.9468	C
ETS	seq_51	B	0.5	T-C	4.12655	0.9	-0.46	147.9	C2'-endo	5	-0.24	not measured	37.2805	C
ETS	seq_51	B	1.5	T-T	4.28955	0.8	-0.13	146.9	C2'-endo	6	-0.24	not measured	36.093	T
ETS	seq_51	B	2.5	C-T	4.50457	0.1	0.26	145.6	C2'-endo	2	-0.86	not measured	33.4625	T
ETS	seq_51	B	5.5	T-C	4.33437	0.3	-0.01	151.3	C2'-endo	1	-0.45	not measured	36.4294	C
ETS	seq_51	A	7.5	T-C	4.35441	0.4	0.15	145.2	C2'-endo	3	-0.24	not measured	37.8521	T
ETS	seq_52	B	-6.5	C-C	4.79576	0.1	0.21	156.6	C2'-endo	6	0.53	not measured	44.1426	C
ETS	seq_52	B	-5.5	T-C	4.25306	0.8	-0.29	151.3	C2'-endo	3	-0.09	not measured	39.833	C
ETS	seq_52	B	-4.5	T-T	4.33012	0.7	-0.09	144.3	C2'-endo	5	-0.41	not measured	39.1453	T
ETS	seq_52	B	-3.5	C-T	4.4389	0.2	0.21	141.4	C1'-exo	6	-0.95	not measured	36.4384	T
ETS	seq_52	B	-0.5	C-C	4.4722	0.1	0.09	147.8	C2'-endo	4	-0.24	not measured	38.2759	C
ETS	seq_52	B	0.5	T-C	4.1278	0.6	-0.22	145.2	C2'-endo	4	-0.46	not measured	35.6492	C
ETS	seq_52	B	1.5	T-T	4.28096	0.6	-0.06	142.4	C1'-exo	4	-0.56	not measured	36.8082	T
ETS	seq_52	B	2.5	C-T	4.42586	0.1	0.18	141.3	C1'-exo	3	-1.21	not measured	34.5097	T
ETS	seq_52	B	5.5	C-T	4.35334	0.6	-0.02	143.9	C1'-exo	5	-0.39	not measured	37.5116	T
ETS	seq_52	B	6.5	T-C	4.26959	0.3	-0.1	144.4	C2'-endo	1	-0.56	not measured	36.438	C
ETS	seq_53	A	-7.5	T-T	4.37557	0.8	0.24	158.2	C2'-endo	4	0.14	not measured	41.8069	T
ETS	seq_53	A	-6.5	T-C	4.35612	0.6	0.19	158.3	C2'-endo	3	0.23	not measured	40.122	T
ETS	seq_53	A	-5.5	C-C	4.64334	0.2	0.09	162.9	C2'-endo	3	0.48	not measured	43.9704	C
ETS	seq_53	B	-3.5	C-C	4.60207	0.3	-0.15	164.3	C2'-endo	4	0.29	not measured	43.35	C
ETS	seq_53	B	-0.5	C-C	4.5407	0.2	0	162.2	C2'-endo	2	0.12	not measured	40.2006	C
ETS	seq_53	B	0.5	T-C	4.33606	0.4	-0.16	160.3	C2'-endo	2	-0.06	not measured	38.3743	C
ETS	seq_53	B	1.5	T-T	4.35353	0.7	-0.12	155.8	C2'-endo	3	-0.23	not measured	38.0463	T
ETS	seq_53	A	3.5	C-T	4.47738	0.4	-0.05	154.2	C2'-endo	3	-0.46	not measured	38.0701	C
ETS	seq_53	B	7.5	C-C	4.58724	0.3	-0.09	164.8	C2'-endo	3	0.27	not measured	42.4269	C
ETS	seq_54	A	-7.5	T-T	4.295	0.8	0.22	149.1	C2'-endo	5	-0.26	not measured	39.0225	T
ETS	seq_54	A	-6.5	T-C	4.29963	0.5	0.14	149.4	C2'-endo	2	-0.17	not measured	37.5648	T
ETS	seq_54	A	-5.5	C-C	4.51096	0.2	0	154.8	C2'-endo	2	-0.03	not measured	39.5076	C
ETS	seq_54	B	-3.5	C-C	4.36806	0.3	-0.1	151	C2'-endo	3	-0.25	not measured	36.3364	C
ETS	seq_54	B	-0.5	C-C	4.55742	0	0.11	159.8	C2'-endo	2	-0.14	not measured	38.6107	C
ETS	seq_54	B	0.5	T-C	4.27923	0.6	-0.19	155	C2'-endo	3	-0.09	not measured	39.8049	C
ETS	seq_54	B	1.5	T-T	4.35251	0.7	-0.09	151.2	C2'-endo	3	-0.32	not measured	38.0305	T
ETS	seq_54	B	2.5	C-T	4.59374	0.1	0.23	151.6	C2'-endo	5	-0.78	not measured	37.046	T
ETS	seq_54	A	4.5	C-T	4.72169	0.1	-0.24	155.6	C2'-endo	7	-0.52	not measured	36.5515	C
ETS	seq_54	B	6.5	C-C	4.68924	0	0.1	157	C2'-endo	5	-0.37	not measured	38.4542	C
ETS	seq_54	B	7.5	C-C	4.41199	0.3	-0.07	152.1	C2'-endo	1	-0.39	not measured	37.1114	C
ETS	seq_55	A	-7.5	T-T	4.35958	1	0.17	142.7	C1'-exo	5	-0.19	not measured	39.2205	T
ETS	seq_55	A	-6.5	T-C	4.3564	0.8	0.23	142.8	C1'-exo	3	-0.06	not measured	38.3189	T
ETS	seq_55	A	-5.5	C-C	4.71669	0.3	0.03	149.2	C2'-endo	5	0.61	not measured	43.4624	C
ETS	seq_55	A	-2.5	C-C	4.27584	0.7	0.16	153.7	C2'-endo	3	-0.23	not measured	37.6382	C
ETS	seq_55	B	-0.5	C-C	4.58068	0.5	-0.27	151.7	C2'-endo	5	0.58	not measured	43.2789	C
ETS	seq_55	B	0.5	T-C	4.2094	1.1	-0.38	149	C2'-endo	4	0.03	not measured	38.5189	C
ETS	seq_55	B	1.5	T-T	4.35285	1	-0.12	143.4	C1'-exo	5	-0.03	not measured	39.4428	T
ETS	seq_55	B	2.5	C-T	4.54827	0.5	0.14	145.5	C2'-endo	5	-0.43	not measured	38.7417	T
ETS	seq_55	A	4.5	C-T	4.68081	0.1	-0.42	138.1	C1'-exo	4	-0.41	not measured	36.362	C
ETS	seq_55	A	5.5	T-C	4.16022	2	0.59	148.9	C2'-endo	11	0.41	not measured	35.0303	T
ETS	seq_55	B	7.5	C-C	4.47873	0.6	0.15	138.2	C1'-exo	5	-0.24	not measured	30.0627	C
ETS	seq_56	B	-6.5	C-C	4.67522	0	0.21	169.5	C2'-endo	4	0.07	not measured	42.2991	C
ETS	seq_56	B	-5.5	T-C	4.43279	0.3	-0.1	166	C2'-endo	1	0.02	not measured	41.145	C
ETS	seq_56	B	-4.5	T-T	4.38606	0.5	-0.03	158.4	C2'-endo	3	-0.35	not measured	37.8536	T
ETS	seq_56	B	-3.5	C-T	4.46107	0.2	0.12	156.2	C2'-endo	4	-0.7	not measured	37.3694	T
ETS	seq_56	B	-0.5	C-C	4.33035	0.2	-0.02	160.1	C2'-endo	2	-0.34	not measured	35.8832	C
ETS	seq_56	B	0.5	T-C	4.22935	0.4	-0.18	161.9	C2'-endo	3	-0.16	not measured	37.5886	C
ETS	seq_56	B	1.5	T-T	4.37753	0.4	-0.04	157.8	C2'-endo	3	-0.44	not measured	37.6264	T
ETS	seq_56	B	2.5	C-T	4.49683	0.2	0.12	156.8	C2'-endo	5	-0.82	not measured	37.3347	T
ETS	seq_56	A	4.5	T-C	4.36709	0.3	0.08	161.2	C2'-endo	0	-0.21	not measured	38.8567	T
ETS	seq_56	A	5.5	C-C	4.58615	0.1	-0.15	162.8	C2'-endo	3	-0.08	not measured	40.1354	C
ETS	seq_56	B	7.5	C-T	4.63269	0.2	0.12	162.4	C2'-endo	7	-0.11	not measured	40.6697	T
ETS	seq_57	B	-6.5	C-C	4.65663	0	0.27	162.3	C2'-endo	3	0	not measured	41.4957	C
ETS	seq_57	B	-5.5	T-C	4.30349	0.4	-0.12	153.7	C2'-endo	3	-0.27	not measured	37.5685	C
ETS	seq_57	B	-4.5	T-T	4.34084	0.5	-0.06	147.6	C2'-endo	4	-0.55	not measured	36.8685	T
ETS	seq_57	A	-2.5	C-C	4.36506	0.1	-0.16	144.9	C2'-endo	1	-0.89	not measured	32.9189	C
ETS	seq_57	B	-0.5	C-C	4.46897	0	0.16	156.3	C2'-endo	2	-0.54	not measured	36.7427	C
ETS	seq_57	B	0.5	T-C	4.10247	0.7	-0.38	146.4	C2'-endo	4	-0.38	not measured	36.6623	C
ETS	seq_57	B	1.5	T-T	4.30141	0.6	-0.14	146.7	C2'-endo	4	-0.5	not measured	36.6623	T
ETS	seq_57	B	2.5	C-T	4.49966	0.1	0.18	147.6	C2'-endo	4	-0.96	not measured	35.9021	T
ETS	seq_57	A	4.5	T-C	4.3451	0.4	0.06	148.8	C2'-endo	2	-0.34	not measured	37.3913	T
ETS	seq_57	A	5.5	C-C	4.50111	0.1	-0.08	152.1	C2'-endo	2	-0.35	not measured	37.3745	C
ETS	seq_58	A	-7.5	T-T	4.17105	1.1	0.24	148.6	C2'-endo	4	-0.24	not measured	38.2453	T
ETS	seq_58	A	-6.5	T-C	4.12525	0.9	0.33	141.5	C1'-exo	4	-0.17	not measured	35.6565	T
ETS	seq_58	A	-5.5	C-C	4.41809	0.3	0.01	143.9	C1'-exo	2	-0.15	not measured	37.5386	C
ETS	seq_58	A	-2.5	C-C	4.25737	0.5	0.25	147.9	C2'-endo	3	-0.42	not measured	36.0394	C
ETS	seq_58	B	-0.5	C-C	4.40691	0.2	0.11	148.3	C2'-endo	2	-0.38	not measured	34.5414	C
ETS	seq_58	B	0.5	T-C	4.08121	1.1	-0.5	142.2	C1'-exo	5	-0.07	not measured	37.8912	C
ETS	seq_58	B	1.5	T-T	4.24725	0.8	-0.09	144.4	C2'-endo	4	-0.29	not measured	37.655	T
ETS	seq_58	B	2.5	T-T	4.25253	1	-0.18	144.3	C2'-endo	4	-0.28	not measured	39.7738	T
ETS	seq_58	A	6.5	C-T	4.52953	0.4	-0.14	146	C2'-endo	6	-0.25	not measured	38.6852	C
ETS	seq_58	A	7.5	T-C	4.24174	0.8	0.32	147.9	C2'-endo	3	-0.13	not measured	38.9731	T
ETS	seq_59	B	-6.5	C-C	4.75043	0	0.25	167.7	C2'-endo	4	0	not measured	43.3659	C
ETS	seq_59	B	-5.5	T-C	4.38764	0.3	-0.13	162.6	C2'-endo	3	-0.02	not measured	41.0568	C
ETS	seq_59	B	-4.5	T-T	4.33996	0.6	-0.18	156.8	C2'-endo	3	-0.25	not measured	38.8097	T
ETS	seq_59	B	-3.5	C-T	4.43334	0.2	0	156.3	C2'-endo	4	-0.57	not measured	38.3254	T
ETS	seq_59	B	-0.5	C-C	4.51901	0	0.14	164.5	C2'-endo	1	-0.21	not measured	41.8314	C
ETS	seq_59	B	0.5	T-C	4.27048	0.4	-0.2	160.9	C2'-endo	4	-0.14	not measured	40.9827	C
ETS	seq_59	B	1.5	T-T	4.35229	0.6	-0.21	156.5	C2'-endo	3	-0.29	not measured	39.9639	T
ETS	seq_59	B	2.5	C-T	4.58761	0.1	0.1	156.9	C2'-endo	7	-0.59	not measured	40.5601	T
ETS	seq_59	A	4.5	C-C	4.66414	0	-0.33	164.7	C2'-endo	4	-0.25	not measured	41.2928	C
ETS	seq_59	A	5.5	C-C	4.47835	0	-0.17	166.6	C2'-endo	1	-0.2	not measured	40.0627	C
ETS	seq_59	A	6.5	C-C	4.49833	0.1	-0.1	164.4	C2'-endo	1	-0.07	not measured	41.1884	C
ETS	seq_6	B	-7.5	C-T	4.57061	0	0.31	145.5	C2'-endo	2	-0.94	not measured	32.5218	T
ETS	seq_6	B	-6.5	T-C	4.18913	0.3	-0.2	142.1	C1'-exo	5	-0.45	not measured	35.0217	C
ETS	seq_6	B	-5.5	T-T	4.39909	0.3	-0.1	144.4	C2'-endo	4	-0.48	not measured	36.5275	T
ETS	seq_6	A	-3.5	C-C	4.39026	0	-0.2	139.3	C1'-exo	7	-1.31	not measured	31.478	C
ETS	seq_6	A	-2.5	C-C	4.63649	0	-0.05	146.3	C2'-endo	3	-0.61	not measured	36.8865	C
ETS	seq_6	B	-0.5	C-C	4.33989	0	0	146.8	C2'-endo	6	-1.24	not measured	29.7035	C
ETS	seq_6	B	0.5	T-C	4.00307	0.4	-0.33	140.3	C1'-exo	9	-0.76	not measured	31.3162	C
ETS	seq_6	B	1.5	T-T	4.34784	0.3	-0.25	143.5	C1'-exo	4	-0.56	not measured	35.0348	T
ETS	seq_6	B	2.5	C-T	4.62883	0	0.21	140.7	C1'-exo	3	-1.3	not measured	31.5116	T
ETS	seq_6	B	3.5	C-C	4.67379	0	0.33	146.2	C2'-endo	8	-1.48	not measured	31.8719	C
ETS	seq_6	B	4.5	C-C	4.61257	0	0.07	147.1	C2'-endo	8	-1.39	not measured	34.468	C
ETS	seq_6	B	5.5	C-C	4.15246	0.2	-0.23	134.4	C1'-exo	3	-1.11	not measured	32.0659	C
ETS	seq_6	B	6.5	T-C	4.05494	0.7	-0.42	136.4	C1'-exo	5	-0.49	not measured	35.1663	C
ETS	seq_6	B	7.5	C-T	4.59542	0.2	-0.03	146.4	C2'-endo	6	-0.32	not measured	37.5422	T
ETS	seq_60	B	-6.5	C-C	4.80903	0.1	0.24	158.6	C2'-endo	4	0.34	not measured	42.5146	C
ETS	seq_60	B	-5.5	T-C	4.29051	0.9	-0.46	153.6	C2'-endo	3	0.07	not measured	39.3522	C
ETS	seq_60	B	-4.5	T-T	4.34766	0.7	-0.14	147.7	C2'-endo	5	-0.18	not measured	37.8647	T
ETS	seq_60	A	-2.5	C-C	4.2546	0.1	-0.01	145.5	C2'-endo	3	-1.24	not measured	31.133	C
ETS	seq_60	B	-0.5	C-C	4.40329	0	0.24	150.5	C2'-endo	1	-0.88	not measured	32.2741	C
ETS	seq_60	B	0.5	T-C	4.06625	1	-0.6	146.4	C2'-endo	5	-0.16	not measured	38.6219	C
ETS	seq_60	B	1.5	T-T	4.27481	0.8	-0.23	146.9	C2'-endo	5	-0.22	not measured	38.1268	T
ETS	seq_60	B	2.5	C-T	4.42454	0.2	0.18	146.6	C2'-endo	2	-0.84	not measured	34.7903	T
ETS	seq_60	A	4.5	C-C	4.63739	0	-0.11	155.4	C2'-endo	5	-0.26	not measured	40.1276	C
ETS	seq_60	A	5.5	C-T	4.78319	0	-0.37	156.5	C2'-endo	8	-0.18	not measured	39.1792	C
ETS	seq_60	A	6.5	T-C	4.33702	1.2	0.5	157.8	C2'-endo	6	0.3	not measured	38.4144	T
ETS	seq_7	A	-7.5	T-T	4.22783	1	0.32	155.3	C2'-endo	3	-0.16	not measured	39.2557	T
ETS	seq_7	A	-6.5	T-C	4.22734	0.7	0.3	152	C2'-endo	2	-0.13	not measured	37.0355	T
ETS	seq_7	A	-5.5	C-C	4.51662	0.1	-0.26	154.5	C2'-endo	2	-0.29	not measured	35.6856	C
ETS	seq_7	A	-2.5	C-C	4.28772	0.4	0.1	161.3	C2'-endo	2	-0.3	not measured	36.487	C
ETS	seq_7	B	-0.5	C-C	4.44618	0.1	0.16	161	C2'-endo	0	-0.19	not measured	37.7903	C
ETS	seq_7	B	0.5	T-C	4.31353	0.5	-0.22	159	C2'-endo	3	0.08	not measured	40.9536	C
ETS	seq_7	B	1.5	T-T	4.28732	0.8	-0.18	152.2	C2'-endo	4	-0.2	not measured	38.1023	T
ETS	seq_7	B	2.5	C-T	4.4715	0.2	0.21	152.6	C2'-endo	3	-0.57	not measured	36.0452	T
ETS	seq_7	B	3.5	C-C	4.41936	0.2	-0.01	158.7	C2'-endo	2	-0.3	not measured	40.7102	C
ETS	seq_7	A	7.5	C-C	4.55775	0.1	-0.07	161.2	C2'-endo	1	0.02	not measured	41.5594	C
ETS	seq_8	B	-7.5	C-C	5.10494	0	0.08	180.6	C3'-exo	2	0.84	not measured	49.5253	C
ETS	seq_8	B	-6.5	C-C	5.16601	0	0.34	179.4	C2'-endo	8	0.35	not measured	47.0085	C
ETS	seq_8	A	-2.5	C-C	4.8237	0	-0.08	175.9	C2'-endo	5	0.08	not measured	44.1882	C
ETS	seq_8	B	-0.5	C-C	4.75181	0	0.12	174.8	C2'-endo	5	-0.21	not measured	42.3046	C
ETS	seq_8	B	0.5	T-C	4.43778	0.1	-0.15	172.3	C2'-endo	4	-0.19	not measured	40.26	C
ETS	seq_8	B	1.5	T-T	4.60394	0.1	-0.08	168.8	C2'-endo	1	-0.21	not measured	38.334	T
ETS	seq_8	B	2.5	C-T	4.91076	0	0.36	168.7	C2'-endo	6	-0.87	not measured	35.6741	T
ETS	seq_8	B	3.5	C-C	4.90644	0	0.37	173.6	C2'-endo	10	-0.91	not measured	38.7185	C
ETS	seq_8	B	4.5	C-C	4.77101	0	0.45	172.1	C2'-endo	8	-1.1	not measured	36.0171	C
ETS	seq_8	B	5.5	C-C	4.54672	0	0.28	171.1	C2'-endo	4	-0.82	not measured	34.6506	C
ETS	seq_8	B	6.5	C-C	4.65222	0	0.31	172.9	C2'-endo	2	-0.4	not measured	37.8031	C
ETS	seq_9	B	-6.5	C-C	4.67295	0	0.22	167.2	C2'-endo	2	0.11	not measured	42.9891	C
ETS	seq_9	B	-5.5	T-C	4.5337	0.1	0.11	166.4	C2'-endo	1	-0.06	not measured	41.2268	C
ETS	seq_9	B	-4.5	T-T	4.39844	0.4	-0.07	156.2	C2'-endo	3	-0.43	not measured	38.0432	T
ETS	seq_9	B	-3.5	T-T	4.38594	0.3	-0.08	152.8	C2'-endo	4	-0.58	not measured	37.1768	T
ETS	seq_9	B	-0.5	C-C	4.55509	0	0.27	158.5	C2'-endo	8	-1.56	not measured	31.8998	C
ETS	seq_9	B	0.5	T-C	4.16281	0.1	-0.11	153.6	C2'-endo	7	-1.01	not measured	30.6528	C
ETS	seq_9	B	1.5	T-T	4.28652	0.3	-0.28	152.2	C2'-endo	4	-0.76	not measured	33.6503	T
ETS	seq_9	B	2.5	C-T	4.60712	0	0.13	153.2	C2'-endo	2	-1.29	not measured	31.2599	T
ETS	seq_9	B	3.5	C-C	4.59866		0.26	159.3	C2'-endo		-1.49	not measured	31.049	C
ETS	seq_9	B	4.5	C-C	4.53283	0	0.3	156	C2'-endo	8	-1.55	not measured	29.5252	C
ETS	seq_9	B	5.5	C-C	4.48678		0.48	155.2	C2'-endo		-1.67	not measured	25.4273	C
LEF1	seq_1	B	-7.5	T-C	4.25821	0.6	-0.27	156.4	C2'-endo	2	-0.08	not measured	43.0107	C
LEF1	seq_1	B	-6.5	T-T	4.39242	0.5	-0.11	153.9	C2'-endo	5	-0.15	not measured	41.824	T
LEF1	seq_1	B	-5.5	T-T	4.3773	0.4	-0.04	151.9	C2'-endo	4	-0.48	not measured	39.9264	T
LEF1	seq_1	B	-4.5	T-T	4.33415	0.5	-0.14	150.1	C2'-endo	5	-0.56	not measured	39.4809	T
LEF1	seq_1	B	-3.5	T-T	4.40878	0.3	-0.12	149.2	C2'-endo	6	-0.66	not measured	38.9723	T
LEF1	seq_1	B	-2.5	C-T	4.60901	0	0.25	149.6	C2'-endo	7	-1.06	not measured	36.6192	T
LEF1	seq_1	B	-1.5	T-C	4.37436	0.1	-0.09	152.6	C2'-endo	3	-0.72	not measured	39.1874	C
LEF1	seq_1	A	0.5	T-C	4.30259	0.2	0.19	149	C2'-endo	2	-0.81	not measured	37.7802	T
LEF1	seq_1	B	2.5	T-T	4.16014	0.7	-0.4	144.4	C2'-endo	3	-0.67	3.84247	38.1245	T
LEF1	seq_1	B	3.5	T-T	4.386	0.4	-0.13	150	C2'-endo	6	-0.51	3.98172	39.7592	T
LEF1	seq_1	B	4.5	C-T	4.73148	0	0.36	152.1	C2'-endo	8	-1.04	not measured	36.4913	T
LEF1	seq_1	B	5.5	C-C	4.51545	0	0.29	153.2	C2'-endo	5	-1.16	not measured	35.0487	C
LEF1	seq_1	A	7.5	T-T	4.51581	0.2	-0.09	154.6	C2'-endo	5	-0.22	not measured	39.5418	T
LEF1	seq_10	B	-7.5	T-T	4.24579	0.9	-0.31	146.1	C2'-endo	4	-0.42	not measured	37.6837	T
LEF1	seq_10	B	-4.5	T-T	4.2371	0.8	-0.22	142.9	C1'-exo	4	-0.36	not measured	37.0528	T
LEF1	seq_10	B	-3.5	T-T	4.40015	0.4	-0.01	146.6	C2'-endo	5	-0.48	not measured	36.9391	T
LEF1	seq_10	B	-2.5	C-T	4.6695	0	0.35	151	C2'-endo	6	-1.02	not measured	35.7797	T
LEF1	seq_10	A	-0.5	T-T	4.21871	0.7	0.32	149.7	C2'-endo	3	-0.54	not measured	36.9122	T
LEF1	seq_10	A	0.5	T-C	4.16599	0.3	0.16	144	C2'-endo	4	-0.7	not measured	31.4295	T
LEF1	seq_10	B	2.5	T-T	4.13383	0.8	-0.29	138	C1'-exo	3	-0.74	3.94973	33.3385	T
LEF1	seq_10	B	3.5	T-T	4.14691	1	-0.38	142.3	C1'-exo	4	-0.43	3.79883	37.8532	T
LEF1	seq_10	B	4.5	C-T	4.48448	0.2	0.19	150.6	C2'-endo	5	-0.57	not measured	37.3288	T
LEF1	seq_10	B	5.5	C-C	4.30541	0.2	0.11	152.2	C2'-endo	1	-0.62	not measured	36.4007	C
LEF1	seq_10	B	6.5	T-C	4.17122	0.6	-0.24	149.8	C2'-endo	3	-0.47	not measured	36.3347	C
LEF1	seq_11	B	-7.5	C-T	4.39249	0.2	0.18	144.5	C2'-endo	4	-0.86	not measured	33.9573	T
LEF1	seq_11	B	-6.5	T-C	4.12255	0.4	-0.11	144.1	C2'-endo	5	-0.49	not measured	35.5782	C
LEF1	seq_11	B	-5.5	T-T	4.22915	0.7	-0.18	144.4	C2'-endo	5	-0.46	not measured	37.6184	T
LEF1	seq_11	B	-4.5	T-T	4.3159	0.5	-0.02	144	C1'-exo	4	-0.64	not measured	37.3822	T
LEF1	seq_11	B	-3.5	T-T	4.39192	0.4	-0.04	142.6	C1'-exo	6	-0.65	not measured	37.7794	T
LEF1	seq_11	B	-2.5	C-T	4.45928	0.1	0.15	143	C1'-exo	3	-1.1	not measured	34.546	T
LEF1	seq_11	B	-1.5	T-C	4.13431	0.5	-0.25	144.7	C2'-endo	3	-0.7	not measured	35.721	C
LEF1	seq_11	B	-0.5	C-T	4.521	0.1	0.22	145.6	C2'-endo	5	-0.97	not measured	34.7443	T
LEF1	seq_11	B	2.5	T-T	4.12412	1.2	-0.52	140.7	C1'-exo	7	-0.26	3.62851	38.7232	T
LEF1	seq_11	B	3.5	T-T	4.29221	0.5	-0.12	142	C1'-exo	5	-0.54	3.92253	36.4013	T
LEF1	seq_11	B	4.5	C-T	4.69647	0	0.41	145.6	C2'-endo	6	-1.18	not measured	34.2823	T
LEF1	seq_11	B	5.5	C-C	4.61117	0	0.27	148.7	C2'-endo	7	-1.2	not measured	35.4654	C
LEF1	seq_11	B	6.5	C-C	4.28216	0.1	-0.02	143.2	C1'-exo	1	-1.05	not measured	33.1267	C
LEF1	seq_11	B	7.5	T-C	4.03174	0.7	-0.3	142	C1'-exo	5	-0.55	not measured	34.1911	C
LEF1	seq_12	B	-7.5	T-T	4.59093	0.1	0.14	150.7	C2'-endo	6	-0.58	not measured	36.4103	T
LEF1	seq_12	A	-5.5	C-C	4.46562	0	-0.16	146.9	C2'-endo	5	-1.55	not measured	29.8905	C
LEF1	seq_12	A	-4.5	C-C	4.62582	0	-0.27	149.5	C2'-endo	6	-1.35	not measured	32.1726	C
LEF1	seq_12	B	1.5	T-C	4.23254	0	-0.05	151.3	C2'-endo	5	-1.19	not measured	30.2557	C
LEF1	seq_12	B	2.5	T-T	4.17152	0.6	-0.37	146.9	C2'-endo	3	-0.82	3.92879	35.4798	T
LEF1	seq_12	B	3.5	T-T	4.34276	0.5	-0.22	149.2	C2'-endo	4	-0.56	3.99225	37.9147	T
LEF1	seq_12	B	4.5	C-T	4.60141	0	0.29	151	C2'-endo	5	-1.03	not measured	34.1579	T
LEF1	seq_12	B	5.5	T-C	4.34104	0.1	-0.07	154.5	C2'-endo	2	-0.77	not measured	37.1179	C
LEF1	seq_12	B	6.5	C-T	4.52173	0.1	0.15	151.2	C2'-endo	5	-1	not measured	35.8943	T
LEF1	seq_12	B	7.5	T-C	4.18337	0.3	-0.14	151.7	C2'-endo	1	-0.69	not measured	34.7804	C
LEF1	seq_13	B	-7.5	C-T	4.40719	0.3	0.09	155.3	C2'-endo	4	-0.55	not measured	37.2687	T
LEF1	seq_13	B	-6.5	T-C	4.26479	0.4	-0.15	160.7	C2'-endo	4	-0.1	not measured	41.0381	C
LEF1	seq_13	B	-5.5	T-T	4.20558	0.7	-0.14	153.9	C2'-endo	5	-0.38	not measured	38.117	T
LEF1	seq_13	B	-4.5	T-T	4.19116	0.7	-0.14	151.1	C2'-endo	5	-0.42	not measured	37.7824	T
LEF1	seq_13	B	-3.5	T-T	4.24761	0.5	-0.02	150.5	C2'-endo	4	-0.6	not measured	35.0905	T
LEF1	seq_13	B	-2.5	C-T	4.46346	0.1	0.23	153.1	C2'-endo	3	-0.85	not measured	35.6534	T
LEF1	seq_13	B	-1.5	T-C	4.29198	0.1	0.04	155.3	C2'-endo	2	-0.86	not measured	35.2146	C
LEF1	seq_13	A	0.5	T-C	4.31947	0.1	0.13	144.4	C2'-endo	2	-0.97	not measured	32.9913	T
LEF1	seq_13	B	2.5	T-T	4.068	1.2	-0.49	143.6	C1'-exo	5	-0.46	3.70281	36.1884	T
LEF1	seq_13	B	3.5	T-T	4.1697	0.8	-0.21	149.9	C2'-endo	5	-0.42	3.7195	37.0337	T
LEF1	seq_14	B	-4.5	T-T	4.27498	0.6	-0.29	144.5	C2'-endo	3	-0.65	not measured	37.0298	T
LEF1	seq_14	B	-3.5	T-T	4.26176	0.6	-0.36	145.8	C2'-endo	4	-0.52	not measured	38.3244	T
LEF1	seq_14	B	-2.5	C-T	4.63112	0	0.24	149.4	C2'-endo	5	-0.85	not measured	36.2286	T
LEF1	seq_14	B	-1.5	T-C	4.43606	0	0.07	153.4	C2'-endo	3	-0.77	not measured	37.7389	C
LEF1	seq_14	A	0.5	C-C	4.58104	0	-0.21	153	C2'-endo	7	-1.55	not measured	31.2062	C
LEF1	seq_14	B	2.5	T-T	4.28481	0.3	-0.28	140.9	C1'-exo	2	-0.97	4.12942	33.6414	T
LEF1	seq_14	B	3.5	T-T	4.24083	0.8	-0.58	144.8	C2'-endo	4	-0.48	3.88392	39.8798	T
LEF1	seq_14	B	4.5	C-T	4.76231	0	0.31	150.1	C2'-endo	7	-0.81	not measured	37.5843	T
LEF1	seq_14	B	5.5	C-C	4.89544	0	0.55	158.4	C2'-endo	9	-1.06	not measured	38.7397	C
LEF1	seq_14	B	6.5	C-C	4.52525	0	0.18	151.5	C2'-endo	5	-1.22	not measured	35.1471	C
LEF1	seq_14	B	7.5	T-C	4.18106	0.5	-0.4	147.7	C2'-endo	2	-0.57	not measured	36.9867	C
LEF1	seq_15	A	-7.5	C-T	4.44005	0.5	0.09	158.3	C2'-endo	4	-0.14	not measured	39.5367	C
LEF1	seq_15	B	-5.5	C-C	4.5628	0	0.15	159.1	C2'-endo	2	-0.21	not measured	38.8247	C
LEF1	seq_15	B	-4.5	C-C	4.25044	0.4	-0.13	153.8	C2'-endo	2	-0.44	not measured	36.7391	C
LEF1	seq_15	B	-3.5	T-C	4.16204	0.6	-0.28	153.3	C2'-endo	6	-0.19	not measured	37.7493	C
LEF1	seq_15	B	-2.5	C-T	4.42371	0.2	0.29	150.5	C2'-endo	4	-0.65	not measured	33.6006	T
LEF1	seq_15	A	-0.5	T-T	4.14725	0.9	0.41	145.9	C2'-endo	4	-0.44	not measured	35.4143	T
LEF1	seq_15	A	0.5	T-C	4.17596	0.4	0.24	143.9	C1'-exo	5	-0.55	not measured	33.7433	T
LEF1	seq_15	B	2.5	T-T	4.06932	1	-0.4	139.8	C1'-exo	7	-0.54	3.72534	33.4943	T
LEF1	seq_15	B	3.5	T-T	4.17307	0.8	-0.27	143.7	C1'-exo	5	-0.43	3.76818	35.844	T
LEF1	seq_15	B	4.5	C-T	4.54494	0	0.31	151.2	C2'-endo	4	-0.8	not measured	34.2094	T
LEF1	seq_15	B	5.5	C-C	4.48125	0	0.34	157.5	C2'-endo	3	-0.84	not measured	34.652	C
LEF1	seq_15	B	6.5	T-C	4.05369	0.9	-0.47	148.3	C2'-endo	3	-0.41	not measured	37.0297	C
LEF1	seq_15	B	7.5	T-T	4.16617	1.1	-0.39	148.2	C2'-endo	5	-0.18	not measured	38.8505	T
LEF1	seq_16	A	-7.5	C-C	4.56514	0	-0.13	160.4	C2'-endo	3	-0.48	not measured	36.9073	C
LEF1	seq_16	A	-4.5	C-C	4.5746	0	-0.11	157.3	C2'-endo	2	-0.46	not measured	38.6394	C
LEF1	seq_16	B	-2.5	C-C	4.65373	0	0.19	162.3	C2'-endo	5	-0.54	not measured	38.5465	C
LEF1	seq_16	B	-1.5	T-C	4.19888	0.3	-0.24	154.5	C2'-endo	6	-0.61	not measured	33.216	C
LEF1	seq_16	A	0.5	T-C	4.13454	0.3	0.24	149.2	C2'-endo	6	-0.73	not measured	32.3136	T
LEF1	seq_16	B	2.5	T-T	4.15567	0.8	-0.3	150.7	C2'-endo	5	-0.45	3.72048	36.5371	T
LEF1	seq_16	B	3.5	T-T	4.25908	0.6	-0.21	151.9	C2'-endo	3	-0.36	3.80056	38.0156	T
LEF1	seq_16	B	4.5	C-T	4.57472	0.1	0.24	155.7	C2'-endo	5	-0.48	not measured	38.2365	T
LEF1	seq_16	B	5.5	C-C	4.57097	0	0.28	162.8	C2'-endo	4	-0.5	not measured	39.0882	C
LEF1	seq_17	A	-7.5	T-T	4.3049	0.7	0.32	157.3	C2'-endo	5	-0.23	not measured	40.2197	T
LEF1	seq_17	A	-6.5	T-T	4.31291	0.6	0.25	151.1	C2'-endo	4	-0.44	not measured	37.9332	T
LEF1	seq_17	B	-4.5	T-C	4.34673	0.2	-0.06	159.4	C2'-endo	1	-0.28	not measured	39.8001	C
LEF1	seq_17	B	-3.5	T-T	4.34676	0.7	-0.35	153.9	C2'-endo	4	-0.17	not measured	41.3605	T
LEF1	seq_17	A	-1.5	C-T	4.67954	0	-0.31	156.3	C2'-endo	7	-1.05	not measured	36.672	C
LEF1	seq_17	A	-0.5	T-T	4.38405	0.6	0.29	157.8	C2'-endo	5	-0.12	not measured	42.4527	T
LEF1	seq_17	A	0.5	T-C	4.21185	0.3	0.21	155.1	C2'-endo	2	-0.45	not measured	39.6465	T
LEF1	seq_17	B	2.5	T-T	4.20996	0.5	-0.31	149.4	C2'-endo	0	-0.89	4.00475	36.0568	T
LEF1	seq_17	B	3.5	T-T	4.22711	0.8	-0.47	150.7	C2'-endo	3	-0.32	3.75624	40.5899	T
LEF1	seq_17	B	4.5	C-T	4.56101	0	0.14	156.6	C2'-endo	5	-0.7	not measured	37.1638	T
LEF1	seq_17	B	5.5	C-C	4.52131	0	0.14	162.2	C2'-endo	4	-0.52	not measured	40.447	C
LEF1	seq_17	B	6.5	C-C	4.52138	0	0.11	162.1	C2'-endo	5	-0.51	not measured	41.003	C
LEF1	seq_18	A	-6.5	C-C	4.47972	0	-0.11	166.7	C2'-endo	1	-0.45	not measured	38.2561	C
LEF1	seq_18	B	-2.5	C-T	4.55743	0	0.17	161.7	C2'-endo	4	-0.99	not measured	34.8246	T
LEF1	seq_18	A	-0.5	T-T	4.20929	0.5	0.35	161.2	C2'-endo	2	-0.68	not measured	37.3906	T
LEF1	seq_18	A	0.5	T-C	4.17852	0.1	0.05	158.5	C2'-endo	5	-1.05	not measured	29.0162	T
LEF1	seq_18	B	2.5	T-T	4.17274	0.4	-0.35	153.9	C2'-endo	3	-1.03	4.07218	31.8376	T
LEF1	seq_18	B	3.5	T-T	4.30097	0.4	-0.21	159.1	C2'-endo	2	-0.6	3.97061	36.8642	T
LEF1	seq_18	B	4.5	C-T	4.66071	0	0.24	162.9	C2'-endo	6	-0.81	not measured	37.4382	T
LEF1	seq_18	B	5.5	C-C	4.74944	0	0.33	168.4	C2'-endo	8	-0.81	not measured	39.5318	C
LEF1	seq_19	B	-7.5	C-C	4.18384	0.2	0	138.1	C1'-exo	6	-0.73	not measured	30.835	C
LEF1	seq_19	A	-5.5	C-C	4.25395	0.2	0.06	145.7	C2'-endo	1	-0.92	not measured	33.1888	C
LEF1	seq_19	A	-4.5	C-C	4.38488	0.1	-0.17	139.4	C1'-exo	1	-0.9	not measured	33.2297	C
LEF1	seq_19	B	-0.5	T-T	4.01903	1.2	-0.51	132.1	C1'-exo	5	-0.69	not measured	35.4898	T
LEF1	seq_19	B	2.5	T-T	3.98486	1.2	-0.4	132.6	C1'-exo	8	-0.52	3.61963	34.656	T
LEF1	seq_19	B	3.5	T-T	4.06186	1	-0.31	134.9	C1'-exo	6	-0.55	3.7162	34.8464	T
LEF1	seq_19	B	4.5	C-T	4.354	0.2	0.16	139	C1'-exo	3	-0.82	not measured	32.7099	T
LEF1	seq_19	B	5.5	C-C	4.26442	0.1	0.09	144.8	C2'-endo	1	-0.75	not measured	34.9489	C
LEF1	seq_19	B	6.5	C-C	4.22903	0.3	-0.07	146	C2'-endo	1	-0.72	not measured	36.5194	C
LEF1	seq_2	B	-7.5	T-T	4.35859	0.5	-0.1	147.3	C2'-endo	5	-0.45	not measured	37.4604	T
LEF1	seq_2	B	-6.5	C-T	4.55169	0.1	0.28	150.6	C2'-endo	5	-0.76	not measured	35.8904	T
LEF1	seq_2	B	-5.5	T-C	4.34643	0.2	-0.01	153.6	C2'-endo	1	-0.47	not measured	37.7464	C
LEF1	seq_2	B	-4.5	T-T	4.32718	0.5	-0.16	147.5	C2'-endo	5	-0.57	not measured	37.5702	T
LEF1	seq_2	B	-3.5	T-T	4.38233	0.3	-0.04	145.6	C2'-endo	6	-0.72	not measured	37.0352	T
LEF1	seq_2	A	0.5	T-C	4.1785	0.3	0.18	145.5	C2'-endo	2	-0.78	not measured	33.4568	T
LEF1	seq_2	B	2.5	T-T	4.1279	0.9	-0.36	143.2	C1'-exo	5	-0.58	3.75975	35.7933	T
LEF1	seq_2	B	3.5	T-T	4.35543	0.4	-0.12	147.9	C2'-endo	5	-0.49	3.95211	37.3654	T
LEF1	seq_2	B	4.5	C-T	4.69241	0	0.36	150.9	C2'-endo	7	-0.94	not measured	35.5843	T
LEF1	seq_2	B	5.5	C-C	4.44711	0	0.18	152.7	C2'-endo	4	-1.03	not measured	35.561	C
LEF1	seq_2	B	6.5	T-C	4.09003	0.7	-0.4	149.2	C2'-endo	2	-0.59	not measured	36.9937	C
LEF1	seq_2	B	7.5	T-T	4.20916	0.9	-0.31	147.3	C2'-endo	5	-0.38	not measured	37.9886	T
LEF1	seq_20	A	-5.5	C-C	4.32758	0.1	0.05	156.2	C2'-endo	0	-0.6	not measured	36.2025	C
LEF1	seq_20	A	-4.5	C-C	4.39215	0.1	-0.02	160.1	C2'-endo	1	-0.63	not measured	36.8989	C
LEF1	seq_20	A	-3.5	C-C	4.4178	0.1	-0.01	162.2	C2'-endo	2	-0.64	not measured	37.5153	C
LEF1	seq_20	A	-2.5	C-C	4.46561	0	-0.13	162.4	C2'-endo	2	-0.5	not measured	38.5216	C
LEF1	seq_20	A	0.5	T-C	4.24871	0.2	0.12	151.1	C2'-endo	5	-0.45	not measured	35.3497	T
LEF1	seq_20	B	2.5	T-T	4.2188	0.7	-0.24	156.5	C2'-endo	4	-0.34	3.72868	37.5147	T
LEF1	seq_20	B	3.5	T-T	4.30073	0.5	-0.12	156.1	C2'-endo	2	-0.42	3.8681	37.9632	T
LEF1	seq_20	B	4.5	C-T	4.54785	0.1	0.19	159	C2'-endo	4	-0.63	not measured	37.6728	T
LEF1	seq_20	B	5.5	C-C	4.45561	0	0.13	163.9	C2'-endo	3	-0.65	not measured	38.0184	C
LEF1	seq_20	B	6.5	C-C	4.33306	0.1	-0.1	161.9	C2'-endo	1	-0.53	not measured	37.8357	C
LEF1	seq_20	B	7.5	C-C	4.32231	0.1	-0.14	162	C2'-endo	1	-0.45	not measured	37.0554	C
LEF1	seq_3	B	-7.5	C-C	4.24775	0.1	0.04	155.4	C2'-endo	3	-0.65	not measured	35.659	C
LEF1	seq_3	B	-6.5	T-C	4.22022	0.2	-0.15	156.9	C2'-endo	3	-0.46	not measured	37.6675	C
LEF1	seq_3	A	-4.5	C-C	4.44367	0	-0.11	153.4	C2'-endo	5	-1.01	not measured	37.7633	C
LEF1	seq_3	A	0.5	T-C	4.20059	0.3	0.24	149.9	C2'-endo	1	-0.71	not measured	37.6247	T
LEF1	seq_3	B	2.5	T-T	4.13323	0.8	-0.39	146.9	C2'-endo	3	-0.64	3.8018	38.1469	T
LEF1	seq_3	B	3.5	T-T	4.26531	0.5	-0.22	150.3	C2'-endo	4	-0.5	3.85594	38.0395	T
LEF1	seq_3	B	4.5	C-T	4.56764	0	0.27	153.7	C2'-endo	6	-0.85	not measured	36.1874	T
LEF1	seq_3	B	5.5	C-C	4.32074	0	0.06	157.1	C2'-endo	3	-0.74	not measured	39.0062	C
LEF1	seq_3	B	6.5	T-C	4.17533	0.5	-0.34	156	C2'-endo	1	-0.43	not measured	41.8224	C
LEF1	seq_3	B	7.5	C-T	4.51381	0.1	0.09	154.5	C2'-endo	8	-0.75	not measured	39.2014	T
LEF1	seq_4	A	-6.5	C-C	4.37068	0.1	-0.04	146.6	C2'-endo	2	-0.49	not measured	38.304	C
LEF1	seq_4	B	-4.5	C-T	4.31309	0.5	-0.04	152.4	C2'-endo	5	-0.44	not measured	38.8672	T
LEF1	seq_4	B	-3.5	T-C	4.18499	0.6	-0.29	155.4	C2'-endo	3	-0.09	not measured	40.9315	C
LEF1	seq_4	B	-2.5	C-T	4.41876	0.2	0.18	155	C2'-endo	4	-0.5	not measured	38.0335	T
LEF1	seq_4	B	-1.5	T-C	4.29656	0.3	-0.06	157.2	C2'-endo	1	-0.45	not measured	39.4678	C
LEF1	seq_4	A	0.5	T-C	4.25888	0.3	0.14	146.2	C2'-endo	1	-0.57	not measured	36.6586	T
LEF1	seq_4	B	2.5	T-T	4.13482	1	-0.32	148.8	C2'-endo	5	-0.3	3.62338	38.915	T
LEF1	seq_4	B	3.5	T-T	4.25161	0.7	-0.11	150.7	C2'-endo	4	-0.32	3.74796	38.5199	T
LEF1	seq_4	B	4.5	C-T	4.40513	0.2	0.22	153	C2'-endo	3	-0.58	not measured	36.9777	T
LEF1	seq_4	B	5.5	T-C	4.189	0.5	-0.18	154.6	C2'-endo	2	-0.33	not measured	38.111	C
LEF1	seq_4	B	6.5	C-T	4.32053	0.4	0.03	151.9	C2'-endo	4	-0.55	not measured	36.9494	T
LEF1	seq_4	B	7.5	T-C	4.17035	0.4	-0.15	152.6	C2'-endo	3	-0.44	not measured	35.6559	C
LEF1	seq_5	B	-7.5	T-C	4.25189	0.6	-0.24	154.1	C2'-endo	4	-0.15	not measured	37.7523	C
LEF1	seq_5	B	-4.5	T-T	4.11901	1.1	-0.4	140.7	C1'-exo	5	-0.3	not measured	37.2724	T
LEF1	seq_5	B	-3.5	T-T	4.19413	1	-0.31	143	C1'-exo	5	-0.29	not measured	38.6147	T
LEF1	seq_5	B	-2.5	C-T	4.39573	0.3	0.17	148.8	C2'-endo	3	-0.63	not measured	36.5	T
LEF1	seq_5	B	-1.5	T-C	4.32785	0.2	-0.01	155.9	C2'-endo	0	-0.52	not measured	38.3284	C
LEF1	seq_5	B	1.5	T-C	4.18655	0.5	-0.17	151.8	C2'-endo	3	-0.44	not measured	34.8338	C
LEF1	seq_5	B	2.5	T-T	4.16873	1	-0.29	145.9	C2'-endo	4	-0.35	3.77388	37.3241	T
LEF1	seq_5	B	3.5	T-T	4.25805	0.8	-0.19	146.3	C2'-endo	4	-0.3	3.82669	38.4475	T
LEF1	seq_5	B	4.5	C-T	4.53838	0.1	0.22	151.4	C2'-endo	5	-0.7	not measured	37.1061	T
LEF1	seq_5	B	5.5	C-C	4.49036	0	0.21	157.5	C2'-endo	3	-0.71	not measured	36.7865	C
LEF1	seq_5	B	6.5	C-C	4.33976	0.2	-0.06	154.3	C2'-endo	1	-0.54	not measured	36.8463	C
LEF1	seq_5	B	7.5	T-C	4.13578	0.7	-0.25	148.7	C2'-endo	5	-0.32	not measured	33.6678	C
LEF1	seq_6	B	-7.5	T-T	4.26585	0.8	-0.19	146.5	C2'-endo	4	-0.36	not measured	38.5514	T
LEF1	seq_6	B	-6.5	T-T	4.26472	0.7	-0.17	145	C2'-endo	4	-0.41	not measured	39.2406	T
LEF1	seq_6	B	-5.5	T-T	4.33505	0.7	-0.18	145.5	C2'-endo	6	-0.39	not measured	39.7904	T
LEF1	seq_6	B	-4.5	C-T	4.54223	0.1	0.26	147.7	C2'-endo	6	-0.72	not measured	36.5764	T
LEF1	seq_6	B	-3.5	T-C	4.18999	0.4	-0.22	145.8	C2'-endo	1	-0.63	not measured	36.8839	C
LEF1	seq_6	A	0.5	T-C	4.2039	0.4	0.25	138	C1'-exo	1	-0.73	not measured	34.5283	T
LEF1	seq_6	B	2.5	T-T	4.09699	1	-0.36	135.8	C1'-exo	5	-0.66	3.81276	34.2341	T
LEF1	seq_6	B	3.5	T-T	4.2028	0.8	-0.3	139.5	C1'-exo	5	-0.49	3.82077	36.8724	T
LEF1	seq_6	B	4.5	C-T	4.51757	0.1	0.27	144.1	C2'-endo	4	-0.87	not measured	33.7018	T
LEF1	seq_6	B	5.5	C-C	4.29398	0.1	0.07	146.5	C2'-endo	2	-0.83	not measured	33.8744	C
LEF1	seq_6	B	6.5	T-C	4.05531	0.7	-0.29	144.7	C2'-endo	4	-0.59	not measured	34.6479	C
LEF1	seq_6	B	7.5	T-T	4.19133	0.9	-0.32	142.6	C1'-exo	5	-0.46	not measured	37.337	T
LEF1	seq_7	B	-6.5	T-T	4.24704	0.7	-0.33	146	C2'-endo	3	-0.72	not measured	36.8856	T
LEF1	seq_7	A	-4.5	C-C	4.42622	0	-0.08	145.8	C2'-endo	4	-1.3	not measured	32.4605	C
LEF1	seq_7	A	-1.5	C-T	4.61017	0	-0.41	133	C1'-exo	4	-1.55	not measured	30.3786	C
LEF1	seq_7	A	-0.5	T-T	4.26033	0.6	0.35	142.2	C1'-exo	4	-0.67	not measured	37.8495	T
LEF1	seq_7	A	0.5	T-C	4.05922	0.2	0.28	143.1	C1'-exo	4	-1.08	not measured	30.2582	T
LEF1	seq_7	B	2.5	T-T	4.10911	0.5	-0.34	134.1	C1'-exo	2	-1.31	4.24113	30.2607	T
LEF1	seq_7	B	3.5	T-T	4.2006	1.1	-0.64	141	C1'-exo	5	-0.39	3.87014	40.1719	T
LEF1	seq_7	B	4.5	C-T	4.62863	0	0.4	143.3	C1'-exo	7	-0.97	not measured	34.19	T
LEF1	seq_7	B	5.5	C-C	4.63572	0	0.44	150.9	C2'-endo	7	-0.9	not measured	37.0697	C
LEF1	seq_7	A	7.5	C-C	4.56012	0	-0.34	160.8	C2'-endo	6	-1	not measured	35.6188	C
LEF1	seq_8	A	-6.5	C-T	4.74376	0	-0.39	160.6	C2'-endo	5	-0.5	not measured	36.3992	C
LEF1	seq_8	A	-5.5	T-C	4.15419	0.5	0.34	158.1	C2'-endo	7	-0.26	not measured	39.4016	T
LEF1	seq_8	A	-4.5	C-C	4.365	0	-0.12	156.4	C2'-endo	7	-0.95	not measured	30.0195	C
LEF1	seq_8	B	-2.5	C-T	4.66886	0	0.34	147.6	C2'-endo	1	-0.85	not measured	31.5326	T
LEF1	seq_8	B	-1.5	T-C	4.40653	0	0.02	157.3	C2'-endo	4	-0.49	not measured	36.6435	C
LEF1	seq_8	A	0.5	T-C	4.27369	0.1	0.12	146.3	C2'-endo	5	-0.91	not measured	33.6514	T
LEF1	seq_8	B	2.5	T-T	4.21447	0.7	-0.4	144.9	C2'-endo	5	-0.45	3.78397	36.0973	T
LEF1	seq_8	B	3.5	T-T	4.31369	0.6	-0.26	148.6	C2'-endo	3	-0.37	3.84589	37.0286	T
LEF1	seq_8	B	4.5	C-T	4.57457	0.1	0.16	153.8	C2'-endo	4	-0.67	not measured	37.2248	T
LEF1	seq_8	B	5.5	C-C	4.56739	0	0.22	161	C2'-endo	5	-0.68	not measured	39.3345	C
LEF1	seq_9	A	-7.5	T-C	4.10043	0.6	0.34	156.1	C2'-endo	3	-0.3	not measured	38.4296	T
LEF1	seq_9	A	-6.5	C-C	4.34326	0.1	0.01	155.4	C2'-endo	1	-0.6	not measured	38.789	C
LEF1	seq_9	B	-4.5	T-T	4.27769	0.5	-0.18	149.4	C2'-endo	4	-0.63	not measured	37.0648	T
LEF1	seq_9	B	-3.5	T-T	4.29897	0.5	-0.23	149.6	C2'-endo	5	-0.58	not measured	38.4295	T
LEF1	seq_9	B	-2.5	C-T	4.62541	0	0.33	154	C2'-endo	6	-0.99	not measured	35.5589	T
LEF1	seq_9	B	-1.5	C-C	4.4406	0	0.24	157.1	C2'-endo	5	-1.13	not measured	35.8614	C
LEF1	seq_9	A	0.5	T-C	4.24617	0.1	0.16	151.8	C2'-endo	1	-0.86	not measured	33.8726	T
LEF1	seq_9	B	2.5	T-T	4.26122	0.3	-0.2	148	C2'-endo	2	-0.87	4.04813	33.7141	T
LEF1	seq_9	B	3.5	T-T	4.24822	0.5	-0.31	149.5	C2'-endo	3	-0.65	3.94718	37.0521	T
LEF1	seq_9	B	4.5	C-T	4.52746	0	0.13	153.1	C2'-endo	5	-0.84	not measured	36.6187	T
LEF1	seq_9	B	5.5	C-C	4.51774	0	0.22	159.7	C2'-endo	5	-0.89	not measured	38.3514	C
LEF1	seq_9	A	7.5	C-T	4.68459	0	-0.31	161.5	C2'-endo	6	-0.86	not measured	38.1001	C
NFY	seq_1	A	-7.5	T-C	4.33047	0.2	0.16	145.9	C2'-endo	1	-0.66	not measured	34.7724	T
NFY	seq_1	A	-6.5	C-C	4.47342	0	-0.08	147.3	C2'-endo	1	-0.8	not measured	34.7051	C
NFY	seq_1	A	-5.5	C-C	4.62856	0	-0.18	149.2	C2'-endo	2	-0.72	not measured	37.2288	C
NFY	seq_1	B	-3.5	C-T	4.59091	0.1	0.1	144.4	C2'-endo	4	-0.78	not measured	36.3825	T
NFY	seq_1	A	-1.5	C-C	4.45578	0	0	148.5	C2'-endo	1	-0.88	4.14105	35.1764	C
NFY	seq_1	B	0.5	T-T	4.27133	0.4	-0.22	140.7	C1'-exo	4	-0.79	3.97223	33.9627	T
NFY	seq_1	A	2.5	T-C	4.29557	0.2	0.19	142.5	C1'-exo	4	-0.71	not measured	35.705	T
NFY	seq_1	B	4.5	C-T	4.45672	0.1	0.02	141.6	C1'-exo	3	-0.98	not measured	34.0507	T
NFY	seq_1	B	5.5	T-C	4.13377	0.5	-0.38	142.9	C1'-exo	6	-0.56	not measured	36.7234	C
NFY	seq_1	B	6.5	C-T	4.54333	0.1	0.1	145.7	C2'-endo	4	-0.72	not measured	35.9575	T
NFY	seq_1	B	7.5	C-C	4.54939	0	0.24	148.9	C2'-endo	2	-0.84	not measured	34.8971	C
NFY	seq_10	B	-7.5	T-T	4.37565	0.5	-0.06	147.5	C2'-endo	5	-0.54	not measured	39.2304	T
NFY	seq_10	A	-5.5	C-C	4.32901	0.1	-0.13	144.8	C2'-endo	0	-0.79	not measured	32.6938	C
NFY	seq_10	B	-3.5	C-C	4.36312	0.1	0.12	146.8	C2'-endo	1	-0.73	not measured	32.9695	C
NFY	seq_10	A	-1.5	C-C	4.25271	0.2	0.05	148	C2'-endo	0	-0.82	4.0375	33.6801	C
NFY	seq_10	B	0.5	T-T	4.22476	0.6	-0.19	141.9	C1'-exo	3	-0.73	3.98914	34.484	T
NFY	seq_10	B	3.5	T-C	4.12904	0.6	-0.3	146.8	C2'-endo	2	-0.52	not measured	36.502	C
NFY	seq_10	B	4.5	C-T	4.40066	0.3	0.11	148.2	C2'-endo	4	-0.67	not measured	36.353	T
NFY	seq_10	B	5.5	T-C	4.24875	0.4	-0.17	150.2	C2'-endo	2	-0.38	not measured	37.917	C
NFY	seq_10	B	6.5	C-T	4.48242	0.2	0.11	148.4	C2'-endo	6	-0.63	not measured	36.2744	T
NFY	seq_10	B	7.5	C-C	4.21389	0.3	-0.07	147.3	C2'-endo	2	-0.6	not measured	34.9988	C
NFY	seq_11	B	-7.5	C-C	4.45156	0	0.18	150.9	C2'-endo	2	-0.83	not measured	37.1161	C
NFY	seq_11	B	-4.5	C-T	4.41451	0.2	0.09	144.7	C2'-endo	4	-0.64	not measured	35.9354	T
NFY	seq_11	B	-3.5	T-C	4.26136	0.2	-0.07	148.6	C2'-endo	4	-0.55	not measured	36.3271	C
NFY	seq_11	A	-1.5	C-C	4.33778	0.1	0.08	147.2	C2'-endo	2	-1.04	4.13384	34.808	C
NFY	seq_11	B	0.5	T-T	4.18185	0.7	-0.32	141.7	C1'-exo	6	-0.6	3.75108	35.8332	T
NFY	seq_11	A	2.5	T-C	4.14465	0.3	0.23	142.7	C1'-exo	6	-0.6	not measured	35.6355	T
NFY	seq_11	B	6.5	C-T	4.48993	0.1	0.11	147.1	C2'-endo	4	-0.62	not measured	36.6907	T
NFY	seq_11	B	7.5	C-C	4.50386	0	0.16	150.3	C2'-endo	1	-0.66	not measured	37.0227	C
NFY	seq_12	A	-5.5	C-C	4.43162	0.1	-0.13	149	C2'-endo	2	-0.54	not measured	36.1265	C
NFY	seq_12	B	-3.5	C-T	4.57051	0.1	0.29	148.9	C2'-endo	6	-0.7	not measured	34.5358	T
NFY	seq_12	A	-1.5	C-C	4.36563	0.1	-0.03	151	C2'-endo	1	-0.65	4.00766	35.5673	C
NFY	seq_12	B	0.5	T-T	4.26685	0.6	-0.09	145.1	C2'-endo	4	-0.61	3.94647	35.2588	T
NFY	seq_12	A	2.5	T-C	4.25891	0.3	0.06	139.6	C1'-exo	2	-0.58	not measured	35.1604	T
NFY	seq_12	B	6.5	C-T	4.48703	0.2	0.16	148	C2'-endo	4	-0.61	not measured	36.5131	T
NFY	seq_13	A	-6.5	C-C	4.4065	0.1	-0.07	153.3	C2'-endo	0	-0.6	not measured	34.48	C
NFY	seq_13	A	-5.5	C-C	4.45201	0.2	-0.03	147.9	C2'-endo	1	-0.44	not measured	36.9512	C
NFY	seq_13	B	-3.5	C-T	4.58944	0.2	0.13	145.3	C2'-endo	5	-0.65	not measured	35.8594	T
NFY	seq_13	A	-1.5	C-C	4.34542	0.1	0.08	148.4	C2'-endo	1	-0.95	4.20336	34.0554	C
NFY	seq_13	B	0.5	T-T	4.25913	0.7	-0.28	140.2	C1'-exo	4	-0.6	3.9525	35.019	T
NFY	seq_13	A	2.5	T-C	4.17494	0.4	0.23	138.8	C1'-exo	4	-0.77	not measured	33.011	T
NFY	seq_13	B	4.5	T-T	4.25785	0.9	-0.36	141.9	C1'-exo	4	-0.48	not measured	36.4961	T
NFY	seq_13	B	5.5	T-T	4.36819	0.6	-0.18	143.9	C1'-exo	3	-0.43	not measured	36.6617	T
NFY	seq_13	B	6.5	C-T	4.59457	0.1	0.22	146.5	C2'-endo	6	-0.7	not measured	36.5261	T
NFY	seq_14	A	-7.5	C-T	4.53461	0.1	-0.11	157.9	C2'-endo	6	-0.63	not measured	38.7804	C
NFY	seq_14	A	-6.5	T-T	4.28433	0.6	0.19	154.4	C2'-endo	3	-0.42	not measured	38.9546	T
NFY	seq_14	A	-5.5	T-C	4.23507	0.4	0.19	152.6	C2'-endo	2	-0.35	not measured	37.9718	T
NFY	seq_14	B	-3.5	T-C	4.28711	0.2	-0.11	155.7	C2'-endo	2	-0.54	not measured	35.7708	C
NFY	seq_14	A	-1.5	C-C	4.39972	0	-0.05	152.4	C2'-endo	2	-0.96	4.1759	34.8059	C
NFY	seq_14	B	0.5	T-T	4.30585	0.5	-0.22	148.9	C2'-endo	3	-0.63	3.98488	36.0103	T
NFY	seq_14	A	2.5	T-C	4.29431	0.2	0.19	149.1	C2'-endo	1	-0.66	not measured	36.9821	T
NFY	seq_14	B	4.5	T-T	4.2277	0.7	-0.32	148.5	C2'-endo	3	-0.58	not measured	36.5005	T
NFY	seq_14	B	5.5	T-T	4.21196	0.8	-0.31	149	C2'-endo	4	-0.4	not measured	37.1681	T
NFY	seq_14	B	6.5	C-T	4.4838	0.2	0.1	154.2	C2'-endo	4	-0.53	not measured	37.016	T
NFY	seq_14	B	7.5	C-C	4.40113	0.1	0.06	160.2	C2'-endo	1	-0.49	not measured	38.7641	C
NFY	seq_15	A	-6.5	C-C	4.37554	0	0.01	160.8	C2'-endo	2	-0.76	not measured	34.3426	C
NFY	seq_15	A	-5.5	C-C	4.43959	0	-0.09	159.1	C2'-endo	2	-0.85	not measured	33.8215	C
NFY	seq_15	A	-4.5	C-C	4.61127	0	-0.21	157.6	C2'-endo	3	-0.8	not measured	35.4706	C
NFY	seq_15	A	-1.5	C-C	4.56789	0	-0.09	160.9	C2'-endo	4	-0.87	4.2787	36.6244	C
NFY	seq_15	B	0.5	T-T	4.27681	0.4	-0.3	152.4	C2'-endo	2	-0.65	3.91705	37.263	T
NFY	seq_15	A	2.5	T-C	4.36269	0.1	0.07	153.7	C2'-endo	3	-0.63	not measured	37.7832	T
NFY	seq_15	B	4.5	C-T	4.5592	0.1	0.08	155.7	C2'-endo	6	-0.76	not measured	38.2045	T
NFY	seq_16	B	-4.5	C-C	4.50563	0.1	0.11	170	C2'-endo	2	-0.08	not measured	39.8197	C
NFY	seq_16	B	-3.5	T-C	4.32202	0.3	-0.1	164.4	C2'-endo	2	-0.26	not measured	35.8276	C
NFY	seq_16	A	-1.5	C-C	4.28532	0.2	-0.03	156.2	C2'-endo	2	-0.97	4.06075	32.2743	C
NFY	seq_16	B	0.5	T-T	4.25867	0.7	-0.19	157.3	C2'-endo	4	-0.36	3.79136	38.5696	T
NFY	seq_16	A	2.5	T-C	4.38917	0.2	0.02	155.5	C2'-endo	2	-0.26	not measured	38.4868	T
NFY	seq_16	B	4.5	C-C	4.34502	0.4	-0.19	164.1	C2'-endo	3	-0.16	not measured	39.1063	C
NFY	seq_16	B	7.5	C-C	4.45703	0.2	-0.03	168.7	C2'-endo	2	-0.06	not measured	40.165	C
NFY	seq_17	A	-7.5	C-C	4.65127	0.1	-0.07	163.6	C2'-endo	3	0.11	not measured	42.7444	C
NFY	seq_17	B	-3.5	C-T	4.70333	0.1	0.17	154.2	C2'-endo	7	-0.67	not measured	38.1117	T
NFY	seq_17	A	-1.5	C-C	4.48782	0	0.04	153.3	C2'-endo	3	-0.95	4.3491	34.0315	C
NFY	seq_17	B	0.5	T-T	4.259	0.6	-0.18	142.7	C1'-exo	6	-0.52	3.87273	33.1727	T
NFY	seq_17	B	3.5	C-C	4.57679	0	0.11	156.9	C2'-endo	5	-1.03	not measured	35.6573	C
NFY	seq_17	B	4.5	C-C	4.20865	0.4	-0.31	148.8	C2'-endo	2	-0.72	not measured	36.167	C
NFY	seq_17	B	5.5	T-C	4.1323	0.8	-0.51	152	C2'-endo	7	-0.12	not measured	38.3002	C
NFY	seq_17	B	6.5	C-T	4.73827	0	0.51	158.2	C2'-endo	3	-0.52	not measured	34.4476	T
NFY	seq_18	B	-7.5	T-T	4.34028	0.6	0.07	131.6	C1'-exo	6	-0.52	not measured	35.2381	T
NFY	seq_18	B	-4.5	C-C	4.34743	0.1	0.23	136.7	C1'-exo	2	-0.78	not measured	31.9602	C
NFY	seq_18	B	-3.5	T-C	4.28969	0.2	0.05	136.1	C1'-exo	2	-0.71	not measured	33.1176	C
NFY	seq_18	A	-1.5	C-C	4.24211	0	0.07	132.7	C1'-exo	4	-1.51	4.4381	30.3687	C
NFY	seq_18	B	0.5	T-T	4.14748	0.8	-0.27	128.8	C1'-exo	6	-0.79	3.92059	32.4883	T
NFY	seq_18	B	3.5	T-C	4.15891	0.5	-0.14	141.2	C1'-exo	4	-0.61	not measured	34.9148	C
NFY	seq_18	B	4.5	C-T	4.32937	0.3	0.03	138.7	C1'-exo	4	-0.94	not measured	34.9644	T
NFY	seq_18	B	7.5	T-C	4.11189	0.5	-0.19	130.6	C1'-exo	4	-0.74	not measured	32.6307	C
NFY	seq_19	B	-7.5	T-T	4.3235	0.5	-0.26	105.7	O4'-endo	5	-0.7	not measured	37.1339	T
NFY	seq_19	A	-1.5	C-C	4.37895	0	-0.05	146.4	C2'-endo	4	-1.34	4.36365	31.1907	C
NFY	seq_19	B	0.5	T-T	3.97812	1	-0.65	133.4	C1'-exo	5	-0.79	3.77478	35.6308	T
NFY	seq_19	A	2.5	T-C	4.06946	0.5	0.41	140.2	C1'-exo	4	-0.8	not measured	35.2168	T
NFY	seq_19	B	4.5	C-T	4.32907	0.2	-0.15	138.7	C1'-exo	3	-1.22	not measured	34.4575	T
NFY	seq_19	B	5.5	T-C	4.14336	0.5	-0.33	148.6	C2'-endo	2	-0.4	not measured	39.878	C
NFY	seq_19	B	6.5	C-T	4.52334	0.2	0.04	151.3	C2'-endo	7	-0.46	not measured	40.0399	T
NFY	seq_2	B	-7.5	C-C	4.42327	0.2	0.06	165.7	C2'-endo	3	0.07	not measured	40.0436	C
NFY	seq_2	A	-5.5	C-C	4.47099	0.2	-0.01	163.6	C2'-endo	3	-0.05	not measured	41.1983	C
NFY	seq_2	B	-3.5	C-C	4.4668	0.2	0.06	163.8	C2'-endo	3	-0.21	not measured	38.9812	C
NFY	seq_2	A	-1.5	C-C	4.32169	0.2	0.01	160.8	C2'-endo	2	-0.4	3.8747	37.1199	C
NFY	seq_2	B	0.5	T-T	4.29131	0.5	-0.05	155.4	C2'-endo	4	-0.46	3.86923	36.2978	T
NFY	seq_2	A	2.5	T-C	4.27206	0.3	0.09	150.2	C2'-endo	2	-0.45	not measured	36.1591	T
NFY	seq_2	B	4.5	C-T	4.27349	0.5	0	150.2	C2'-endo	4	-0.49	not measured	34.5565	T
NFY	seq_2	B	5.5	T-C	4.06014	0.8	-0.4	155.4	C2'-endo	6	-0.12	not measured	36.8471	C
NFY	seq_2	B	6.5	C-T	4.29013	0.4	0.06	158.6	C2'-endo	4	-0.34	not measured	36.8791	T
NFY	seq_2	B	7.5	T-C	4.17255	0.5	-0.23	162.4	C2'-endo	3	-0.28	not measured	38.1921	C
NFY	seq_20	A	-7.5	T-C	4.25724	0.5	0.15	150.9	C2'-endo	3	-0.15	not measured	39.8517	T
NFY	seq_20	A	-6.5	C-T	4.41906	0.4	-0.09	154.7	C2'-endo	3	-0.31	not measured	38.2343	C
NFY	seq_20	A	-5.5	T-C	4.23678	0.6	0.25	151.4	C2'-endo	3	-0.19	not measured	37.5572	T
NFY	seq_20	B	-3.5	C-C	4.49513	0.1	0.18	154.4	C2'-endo	3	-0.53	not measured	36.5418	C
NFY	seq_20	A	-1.5	C-C	4.18299	0.3	0.08	148.8	C2'-endo	3	-0.75	3.92261	34.3754	C
NFY	seq_20	B	0.5	T-T	4.28459	0.6	-0.22	140.9	C1'-exo	3	-0.62	4.00724	35.101	T
NFY	seq_20	B	3.5	C-C	4.43512	0	0.19	152.1	C2'-endo	2	-0.95	not measured	33.9355	C
NFY	seq_20	B	4.5	C-C	4.13657	0.4	-0.22	145.9	C2'-endo	2	-0.77	not measured	35.4603	C
NFY	seq_20	B	5.5	T-C	4.07591	0.9	-0.47	150	C2'-endo	5	-0.24	not measured	38.585	C
NFY	seq_20	B	6.5	C-T	4.45739	0.2	0.24	151	C2'-endo	4	-0.43	not measured	35.7604	T
NFY	seq_20	B	7.5	C-C	4.28324	0.1	0.03	149.1	C2'-endo	3	-0.57	not measured	34.4574	C
NFY	seq_21	A	-7.5	C-C	4.50002	0.1	-0.04	155.3	C2'-endo	1	-0.53	not measured	36.47	C
NFY	seq_21	B	-3.5	C-T	4.72605	0	0.23	147.8	C2'-endo	8	-0.9	not measured	35.4531	T
NFY	seq_21	A	-1.5	C-C	4.55165	0	-0.12	152.7	C2'-endo	5	-1.21	4.54211	32.8508	C
NFY	seq_21	B	0.5	T-T	4.28113	0.5	-0.11	141	C1'-exo	5	-0.7	3.95707	31.6775	T
NFY	seq_21	B	3.5	C-C	4.91399	0	0.54	157.4	C2'-endo	9	-1.25	not measured	34.2772	C
NFY	seq_21	B	4.5	C-C	4.40635	0	0.05	147.8	C2'-endo	6	-1.37	not measured	32.2136	C
NFY	seq_21	B	5.5	T-C	4.07929	0.9	-0.56	147.8	C2'-endo	3	-0.54	not measured	37.6154	C
NFY	seq_21	B	6.5	C-T	4.64861	0	0.25	151.8	C2'-endo	6	-0.67	not measured	36.1368	T
NFY	seq_22	A	-7.5	T-C	4.24336	0.4	0.11	153.8	C2'-endo	4	-0.16	not measured	39.3134	T
NFY	seq_22	A	-6.5	C-T	4.39959	0.4	-0.05	157.4	C2'-endo	3	-0.34	not measured	38.8452	C
NFY	seq_22	A	-5.5	T-C	4.25991	0.4	0.16	156.2	C2'-endo	3	-0.16	not measured	37.8746	T
NFY	seq_22	B	-3.5	C-C	4.4402	0.1	0.11	158.8	C2'-endo	0	-0.44	not measured	36.8038	C
NFY	seq_22	A	-1.5	C-C	4.4276	0.1	-0.07	159.1	C2'-endo	1	-0.52	4.03916	37.2766	C
NFY	seq_22	B	0.5	T-T	4.33897	0.6	-0.26	150.9	C2'-endo	3	-0.42	3.94496	37.8234	T
NFY	seq_22	B	3.5	C-C	4.56961	0	0.15	160	C2'-endo	4	-0.45	not measured	38.5041	C
NFY	seq_22	B	4.5	C-C	4.37699	0.3	-0.09	157	C2'-endo	2	-0.45	not measured	39.0988	C
NFY	seq_22	B	5.5	T-C	4.16838	0.8	-0.41	155.2	C2'-endo	3	-0.15	not measured	39.7289	C
NFY	seq_22	B	6.5	C-T	4.46188	0.3	0.18	156	C2'-endo	4	-0.31	not measured	37.5019	T
NFY	seq_22	B	7.5	C-C	4.32382	0.1	0.12	156.3	C2'-endo	3	-0.52	not measured	34.6754	C
NFY	seq_23	B	-4.5	C-C	4.35452	0	0.06	160.2	C2'-endo	0	-0.69	not measured	36.174	C
NFY	seq_23	B	-3.5	T-C	4.254	0.1	-0.08	158.1	C2'-endo	2	-0.64	not measured	35.8988	C
NFY	seq_23	A	-1.5	C-C	4.44877	0	-0.08	154.2	C2'-endo	5	-1.34	4.45615	33.4008	C
NFY	seq_23	B	0.5	T-T	4.23386	0.4	-0.22	150.3	C2'-endo	3	-0.85	3.97405	34.2165	T
NFY	seq_23	B	3.5	C-C	4.48486	0	0.19	162.5	C2'-endo	4	-0.84	not measured	36.9716	C
NFY	seq_23	B	4.5	C-C	4.43825	0	0.12	160.2	C2'-endo	5	-0.97	not measured	37.6599	C
NFY	seq_23	A	6.5	C-T	4.7283	0	-0.37	164.3	C2'-endo	8	-0.71	not measured	37.6456	C
NFY	seq_23	A	7.5	T-C	4.485	0.2	0.08	160.5	C2'-endo	1	-0.04	not measured	40.854	T
NFY	seq_24	A	-7.5	C-C	4.78979	0	-0.01	159.3	C2'-endo	10	-0.62	not measured	43.1855	C
NFY	seq_24	B	-3.5	T-T	4.37813	0.5	-0.63	139	C1'-exo	2	-0.62	not measured	38.7249	T
NFY	seq_24	A	-1.5	C-C	4.46498	0	0.16	148.7	C2'-endo	8	-1.47	4.48656	32.024	C
NFY	seq_24	B	0.5	T-T	4.42054	0	-0.2	141.3	C1'-exo	2	-1.13	4.25483	31.1383	T
NFY	seq_24	B	3.5	C-C	5.00399		0.38	156.8	C2'-endo		-1.4	not measured	35.89	C
NFY	seq_24	B	4.5	C-C	4.65124	0	0.11	151.3	C2'-endo	10	-1.52	not measured	33.7504	C
NFY	seq_24	B	5.5	T-C	4.1113	0.3	-0.49	145	C2'-endo	6	-0.88	not measured	33.8667	C
NFY	seq_24	B	6.5	C-T	4.88717	0	0.59	150.8	C2'-endo	5	-0.95	not measured	30.5217	T
NFY	seq_24	B	7.5	C-C	4.81843		0.57	152.3	C2'-endo		-1.26	not measured	32.2248	C
NFY	seq_25	B	-6.5	T-T	4.3702	0.2	-0.07	161.5	C2'-endo	4	-0.57	not measured	37.9587	T
NFY	seq_25	B	-3.5	C-T	4.60394	0	0.13	162.7	C2'-endo	8	-0.83	not measured	38.624	T
NFY	seq_25	A	-1.5	C-C	4.47808	0	-0.08	166.8	C2'-endo	6	-1.02	4.33565	37.2819	C
NFY	seq_25	B	0.5	T-T	4.29311	0.3	-0.21	158.9	C2'-endo	3	-0.71	3.95476	37.1413	T
NFY	seq_25	B	3.5	C-C	4.56197	0	0.25	168	C2'-endo	7	-1.02	not measured	37.5153	C
NFY	seq_25	B	6.5	C-T	4.49977	0.1	0.04	162.4	C2'-endo	6	-0.75	not measured	38.2275	T
NFY	seq_26	B	-3.5	C-C	4.42957	0.1	0.02	162.3	C2'-endo	1	-0.4	not measured	37.081	C
NFY	seq_26	A	-1.5	C-C	4.45692	0.1	-0.07	163.2	C2'-endo	2	-0.4	4.00965	38.3418	C
NFY	seq_26	B	0.5	T-T	4.32337	0.5	-0.11	156.2	C2'-endo	3	-0.44	3.90341	35.306	T
NFY	seq_26	B	3.5	C-C	4.40933	0.1	0.02	165	C2'-endo	1	-0.38	not measured	38.7424	C
NFY	seq_26	B	6.5	C-T	4.52386	0.3	-0.01	160.8	C2'-endo	4	-0.12	not measured	40.3742	T
NFY	seq_27	A	-5.5	C-C	4.58092	0.1	-0.07	171	C2'-endo	4	-0.11	not measured	41.2193	C
NFY	seq_27	B	-3.5	C-T	4.62185	0	0.27	165.5	C2'-endo	6	-0.63	not measured	37.0447	T
NFY	seq_27	A	-1.5	C-C	4.40399	0.1	-0.04	166.8	C2'-endo	2	-0.74	4.15215	35.9007	C
NFY	seq_27	B	0.5	T-T	4.27545	0.5	-0.15	160.1	C2'-endo	4	-0.58	3.89445	34.0463	T
NFY	seq_27	B	3.5	C-C	4.36502	0.1	0.04	168.4	C2'-endo	1	-0.43	not measured	38.5886	C
NFY	seq_27	B	4.5	T-C	4.14664	0.6	-0.27	165.2	C2'-endo	3	-0.28	not measured	39.0326	C
NFY	seq_27	B	5.5	T-T	4.31999	0.5	-0.09	163.8	C2'-endo	3	-0.37	not measured	38.2546	T
NFY	seq_27	B	6.5	C-T	4.5228	0.1	0.13	165	C2'-endo	6	-0.51	not measured	39.4602	T
NFY	seq_28	A	-7.5	C-C	4.44976	0.1	0.12	157.3	C2'-endo	2	-0.3	not measured	39.8667	C
NFY	seq_28	A	-6.5	C-C	4.39616	0.1	0.02	156.7	C2'-endo	1	-0.49	not measured	37.2733	C
NFY	seq_28	A	-5.5	C-C	4.47614	0.1	-0.03	154.8	C2'-endo	2	-0.61	not measured	36.4356	C
NFY	seq_28	B	-3.5	C-C	4.61421	0	0.2	154.5	C2'-endo	4	-0.77	not measured	35.9837	C
NFY	seq_28	A	-1.5	C-C	4.51078	0	-0.1	155.2	C2'-endo	3	-0.95	4.26194	35.8993	C
NFY	seq_28	B	0.5	T-T	4.29945	0.5	-0.32	147.2	C2'-endo	3	-0.64	3.92323	35.9845	T
NFY	seq_28	B	3.5	C-C	4.68273	0	0.3	158.2	C2'-endo	7	-0.92	not measured	37.3214	C
NFY	seq_28	B	4.5	T-C	4.18797	0.5	-0.38	151.4	C2'-endo	2	-0.48	not measured	38.3149	C
NFY	seq_28	B	5.5	T-T	4.32612	0.8	-0.36	150.3	C2'-endo	4	-0.21	not measured	40.3397	T
NFY	seq_28	B	6.5	T-T	4.53863	0.3	-0.01	151.6	C2'-endo	5	-0.38	not measured	39.1724	T
NFY	seq_29	A	-5.5	C-C	4.53215	0	-0.22	154.3	C2'-endo	3	-0.54	not measured	35.1322	C
NFY	seq_29	A	-4.5	C-C	4.14037	0.3	0.25	153.4	C2'-endo	4	-1.06	not measured	31.0399	C
NFY	seq_29	A	-1.5	C-C	4.68875	0	-0.31	153.6	C2'-endo	8	-1.52	4.7688	32.536	C
NFY	seq_29	B	0.5	T-T	4.16487	0.8	-0.39	138.4	C1'-exo	7	-0.49	3.72953	34.3109	T
NFY	seq_29	B	3.5	C-C	5.0068		0.59	156.9	C2'-endo		-1.41	not measured	35.5476	C
NFY	seq_29	B	4.5	C-C	4.38952	0	0.03	144.6	C2'-endo	8	-1.69	not measured	29.3091	C
NFY	seq_29	B	5.5	T-C	3.68235	1.6	-0.85	136.3	C1'-exo	11	-0.59	not measured	34.7691	C
NFY	seq_29	B	6.5	T-T	4.27847	0.9	-0.32	150.8	C2'-endo	9	0.06	not measured	40.0382	T
NFY	seq_3	A	-6.5	C-C	4.27082	0.7	0.08	69.3	C4'-exo	4	-0.34	not measured	36.9685	C
NFY	seq_3	B	-4.5	C-C	4.39424	0.2	0.07	152.7	C2'-endo	2	-0.16	not measured	40.206	C
NFY	seq_3	B	-3.5	T-C	4.32806	0.3	-0.04	151.1	C2'-endo	2	-0.3	not measured	38.2368	C
NFY	seq_3	A	-1.5	C-C	4.28301	0.1	-0.08	138.3	C1'-exo	2	-0.94	4.02659	32.9388	C
NFY	seq_3	B	0.5	T-T	4.12951	0.9	-0.29	140.2	C1'-exo	6	-0.44	3.68611	37.3169	T
NFY	seq_3	A	2.5	T-C	4.2493	0.4	0.11	138.3	C1'-exo	3	-0.51	not measured	36.7257	T
NFY	seq_3	B	4.5	C-T	4.36477	0.5	0	143.4	C1'-exo	5	-0.48	not measured	37.6563	T
NFY	seq_3	B	7.5	C-C	4.35159	0.2	0.07	150.8	C2'-endo	2	-0.34	not measured	37.9762	C
NFY	seq_30	B	-7.5	T-T	4.69225	0.2	0.15	143	C1'-exo	12	-0.47	not measured	41.2684	T
NFY	seq_30	A	-5.5	T-C	4.25789	0.3	0.32	145.2	C2'-endo	1	-0.69	not measured	36.1267	T
NFY	seq_30	A	-4.5	C-C	4.3865	0.1	-0.02	149.5	C2'-endo	2	-0.81	not measured	34.1516	C
NFY	seq_30	A	-1.5	C-C	4.53258	0	-0.26	149.4	C2'-endo	4	-1.14	4.41129	33.7129	C
NFY	seq_30	B	0.5	T-T	4.26642	0.4	-0.2	143.7	C1'-exo	3	-0.81	4.06587	34.9347	T
NFY	seq_30	B	3.5	C-C	4.28155	0.2	-0.07	150.9	C2'-endo	1	-0.66	not measured	36.5527	C
NFY	seq_30	B	4.5	C-C	4.46187	0	0.1	154.6	C2'-endo	3	-0.57	not measured	37.8379	C
NFY	seq_31	A	-7.5	C-C	4.30096	0.3	0.06	152.2	C2'-endo	0	-0.49	not measured	38.3467	C
NFY	seq_31	A	-6.5	C-T	4.38552	0.4	-0.01	153.2	C2'-endo	4	-0.55	not measured	36.0465	C
NFY	seq_31	A	-5.5	T-C	4.20284	0.6	0.33	146.3	C2'-endo	2	-0.49	not measured	35.379	T
NFY	seq_31	A	-2.5	T-C	4.17554	0.5	0.27	148.6	C2'-endo	2	-0.47	not measured	37.105	T
NFY	seq_31	A	-1.5	C-C	4.20033	0.2	0.07	150.2	C2'-endo	1	-0.9	4.01811	33.7556	C
NFY	seq_31	B	0.5	T-T	4.20128	0.6	-0.25	138.7	C1'-exo	3	-0.85	4.03179	32.4376	T
NFY	seq_31	B	3.5	C-C	4.35441	0	0.24	152.7	C2'-endo	2	-1.02	not measured	32.4663	C
NFY	seq_31	B	4.5	C-C	4.15873	0.1	0.01	146.4	C2'-endo	3	-1.15	not measured	31.689	C
NFY	seq_31	B	5.5	T-C	4.01673	0.9	-0.45	144.4	C2'-endo	3	-0.53	not measured	35.6401	C
NFY	seq_31	B	6.5	C-T	4.37268	0.4	0.09	145.6	C2'-endo	4	-0.57	not measured	35.3478	T
NFY	seq_31	B	7.5	C-C	4.41538	0	0.16	153.6	C2'-endo	2	-0.64	not measured	35.7511	C
NFY	seq_32	A	-5.5	C-C	4.54909	0.3	0.02	148.3	C2'-endo	5	-0.24	not measured	39.4758	C
NFY	seq_32	A	-2.5	T-C	4.15076	0.8	0.33	127.7	C1'-exo	6	-0.33	not measured	34.6243	T
NFY	seq_32	A	-1.5	C-C	4.21436	0.3	0.01	143.1	C1'-exo	5	-0.77	3.9401	31.7895	C
NFY	seq_32	B	0.5	T-T	4.13357	1	-0.29	126	C1'-exo	8	-0.55	3.82822	31.347	T
NFY	seq_32	B	3.5	C-C	4.45949	0.1	0.19	148.4	C2'-endo	0	-0.76	not measured	34.2986	C
NFY	seq_32	B	4.5	C-C	4.3807	0.1	0.18	144.6	C2'-endo	2	-0.8	not measured	32.5527	C
NFY	seq_32	B	5.5	T-C	4.16936	0.8	-0.4	141.1	C1'-exo	4	-0.31	not measured	35.2467	C
NFY	seq_32	B	6.5	T-T	4.3182	0.7	-0.13	137.6	C1'-exo	4	-0.45	not measured	34.4777	T
NFY	seq_33	B	-6.5	T-C	4.54749	0.4	-0.14	165.8	C2'-endo	3	0.28	not measured	43.2316	C
NFY	seq_33	A	-2.5	C-C	4.21819	0	0.07	149.3	C2'-endo	6	-1.44	not measured	29.4166	C
NFY	seq_33	A	-1.5	C-C	4.54406	0	-0.36	146.9	C2'-endo	5	-1.32	4.52548	29.0473	C
NFY	seq_33	B	0.5	T-T	4.24474	0.7	-0.29	148.4	C2'-endo	4	-0.53	3.8584	35.6491	T
NFY	seq_33	B	3.5	C-C	4.62153	0	0.4	157	C2'-endo	5	-1.16	not measured	32.1335	C
NFY	seq_33	B	4.5	C-C	4.24543	0	-0.05	151	C2'-endo	5	-1.21	not measured	32.9401	C
NFY	seq_33	B	5.5	T-C	4.28395	0.5	-0.29	157.2	C2'-endo	1	-0.26	not measured	40.2015	C
NFY	seq_33	B	6.5	C-T	4.63542	0.1	0.11	157.3	C2'-endo	5	-0.56	not measured	38.6314	T
NFY	seq_34	B	-6.5	C-T	4.62532	0.1	0.17	179	C2'-endo	5	-0.17	not measured	42.0599	T
NFY	seq_34	B	-3.5	T-C	4.30889	0.1	-0.01	174.9	C2'-endo	2	-0.45	not measured	35.224	C
NFY	seq_34	A	-1.5	C-C	4.32874	0.1	-0.02	169.1	C2'-endo	1	-0.86	4.04118	35.0566	C
NFY	seq_34	B	0.5	T-T	4.25671	0.4	-0.2	170.5	C2'-endo	3	-0.62	3.8801	35.9012	T
NFY	seq_34	B	3.5	C-C	4.33899	0.1	-0.02	175.3	C2'-endo	1	-0.43	not measured	38.9993	C
NFY	seq_34	B	6.5	C-T	4.56042	0.1	0.1	177.2	C2'-endo	5	-0.16	not measured	42.4126	T
NFY	seq_35	A	-5.5	C-C	4.41023	0	-0.21	145.7	C2'-endo	3	-1.41	not measured	28.3309	C
NFY	seq_35	A	-2.5	C-C	4.34811	0	-0.07	147.1	C2'-endo	6	-1.54	not measured	30.8233	C
NFY	seq_35	A	-1.5	C-C	4.49677	0	-0.07	146.8	C2'-endo	6	-1.37	4.48779	31.6946	C
NFY	seq_35	B	0.5	T-T	4.28671	0.4	-0.21	144.8	C2'-endo	5	-0.74	3.94297	33.797	T
NFY	seq_35	B	3.5	C-C	4.51611	0	0.12	150.5	C2'-endo	5	-1.32	not measured	30.8142	C
NFY	seq_35	B	4.5	C-C	4.26218	0	0.09	146.4	C2'-endo	8	-1.66	not measured	27.8046	C
NFY	seq_35	B	5.5	T-C	3.92243	1.1	-0.81	144.6	C2'-endo	4	-0.58	not measured	38.8013	C
NFY	seq_35	B	6.5	C-T	4.68207	0	0.4	152.7	C2'-endo	6	-0.76	not measured	34.8472	T
NFY	seq_35	B	7.5	C-C	4.36169	0	0.22	145.9	C2'-endo	4	-1.34	not measured	30.9734	C
NFY	seq_36	A	-7.5	T-C	4.21263	0.4	0.17	161.6	C2'-endo	6	-0.14	not measured	39.1592	T
NFY	seq_36	A	-6.5	C-T	4.36006	0.3	0	160.5	C2'-endo	3	-0.41	not measured	37.4196	C
NFY	seq_36	A	-5.5	T-C	4.26413	0.4	0.22	155.3	C2'-endo	3	-0.29	not measured	38.4036	T
NFY	seq_36	B	-3.5	T-T	4.50776	0.2	-0.03	154.9	C2'-endo	4	-0.71	not measured	36.0865	T
NFY	seq_36	A	-1.5	C-C	4.50813	0	-0.06	156.7	C2'-endo	4	-1.01	4.38527	33.646	C
NFY	seq_36	B	0.5	T-T	4.37336	0.4	-0.17	151.8	C2'-endo	2	-0.67	4.06203	34.6537	T
NFY	seq_36	B	3.5	C-C	4.48432	0	0.07	159.9	C2'-endo	2	-0.62	not measured	36.1746	C
NFY	seq_36	B	4.5	T-C	4.16896	0.6	-0.35	157.2	C2'-endo	4	-0.27	not measured	38.1924	C
NFY	seq_36	B	5.5	T-T	4.31088	0.6	-0.17	154.4	C2'-endo	3	-0.34	not measured	37.371	T
NFY	seq_36	B	6.5	C-T	4.53096	0.1	0.2	156.6	C2'-endo	4	-0.58	not measured	37.4364	T
NFY	seq_36	B	7.5	T-C	4.29832	0.3	-0.24	159.9	C2'-endo	0	-0.41	not measured	38.9355	C
NFY	seq_37	A	-7.5	C-T	4.48083	0.2	-0.09	165.6	C2'-endo	3	-0.37	not measured	38.4402	C
NFY	seq_37	A	-6.5	T-C	4.35842	0.3	0.14	162.1	C2'-endo	1	-0.1	not measured	38.3095	T
NFY	seq_37	A	-5.5	C-C	4.51946	0.1	-0.06	163.7	C2'-endo	2	-0.13	not measured	39.6457	C
NFY	seq_37	B	-3.5	C-T	4.61515	0	0.24	161	C2'-endo	3	-0.65	not measured	36.0513	T
NFY	seq_37	A	-1.5	T-C	4.25817	0.3	0.14	159.3	C2'-endo	4	-0.41	3.7676	35.3993	T
NFY	seq_37	B	0.5	T-T	4.29408	0.4	-0.13	155.8	C2'-endo	4	-0.59	3.90657	33.9521	T
NFY	seq_37	B	3.5	C-C	4.38847	0	0.11	163.7	C2'-endo	1	-0.62	not measured	36.8035	C
NFY	seq_37	B	4.5	C-C	4.27187	0.2	-0.09	162.4	C2'-endo	2	-0.56	not measured	36.9213	C
NFY	seq_37	B	5.5	T-C	4.24424	0.4	-0.24	163.1	C2'-endo	3	-0.21	not measured	38.8977	C
NFY	seq_37	B	6.5	C-T	4.53241	0.1	0.17	162.3	C2'-endo	3	-0.43	not measured	37.8933	T
NFY	seq_37	B	7.5	C-C	4.43946	0.1	0.08	163.8	C2'-endo	0	-0.37	not measured	37.3209	C
NFY	seq_38	A	-6.5	T-C	4.35457	0.2	0.03	155.2	C2'-endo	1	-0.4	not measured	37.272	T
NFY	seq_38	A	-5.5	C-C	4.53626	0	-0.1	161.5	C2'-endo	4	-0.2	not measured	39.3992	C
NFY	seq_38	A	-4.5	C-T	4.65109	0.1	-0.28	163.5	C2'-endo	6	-0.38	not measured	36.5735	C
NFY	seq_38	A	-1.5	C-C	4.63739	0	-0.14	161.1	C2'-endo	7	-1.01	4.51643	36.3044	C
NFY	seq_38	B	0.5	T-T	4.40857	0.5	-0.24	155.3	C2'-endo	2	-0.55	4.05654	38.5925	T
NFY	seq_38	B	3.5	C-C	4.62429	0	0.3	161.6	C2'-endo	4	-0.98	not measured	33.0271	C
NFY	seq_38	B	4.5	C-C	4.32203	0.1	-0.02	157.2	C2'-endo	3	-0.87	not measured	35.0273	C
NFY	seq_38	B	5.5	T-C	4.17641	0.4	-0.22	158.4	C2'-endo	3	-0.4	not measured	37.2548	C
NFY	seq_38	B	6.5	C-T	4.57095	0	0.28	158.6	C2'-endo	5	-0.69	not measured	36.3315	T
NFY	seq_39	B	-7.5	T-C	4.30662	0.3	-0.19	161.6	C2'-endo	1	-0.34	not measured	39.8378	C
NFY	seq_39	A	-5.5	C-T	4.49815	0.1	-0.18	158.6	C2'-endo	4	-0.67	not measured	35.6642	C
NFY	seq_39	B	-3.5	T-C	4.30687	0.1	0.04	159.9	C2'-endo	2	-0.63	not measured	33.8649	C
NFY	seq_39	A	-1.5	C-C	4.42216	0	-0.21	157.1	C2'-endo	2	-1	4.25239	32.2254	C
NFY	seq_39	B	0.5	T-T	4.17184	0.7	-0.3	150.4	C2'-endo	4	-0.51	3.78685	34.8857	T
NFY	seq_39	B	3.5	C-C	4.38709	0.1	0	162.6	C2'-endo	3	-0.49	not measured	39.1089	C
NFY	seq_39	B	4.5	T-C	4.12477	0.7	-0.38	158.7	C2'-endo	3	-0.19	not measured	39.9048	C
NFY	seq_39	B	5.5	T-T	4.30561	0.6	-0.14	157.2	C2'-endo	3	-0.26	not measured	38.7621	T
NFY	seq_39	B	6.5	C-T	4.56273	0.1	0.16	159.6	C2'-endo	7	-0.5	not measured	39.9122	T
NFY	seq_4	A	-7.5	C-C	4.23113	0.5	0.2	162.2	C2'-endo	3	-0.12	not measured	39.132	C
NFY	seq_4	A	-6.5	C-C	4.29521	0.5	0.27	162.3	C2'-endo	1	-0.25	not measured	38.9184	C
NFY	seq_4	A	-5.5	C-C	4.4701	0.1	0.01	160.3	C2'-endo	3	-0.39	not measured	38.6411	C
NFY	seq_4	B	-3.5	T-T	4.25462	0.7	-0.27	154.3	C2'-endo	4	-0.46	not measured	36.194	T
NFY	seq_4	A	-1.5	C-C	4.2847	0.3	0.16	147.6	C2'-endo	3	-0.52	3.87897	34.4932	C
NFY	seq_4	B	0.5	T-T	4.27516	0.6	-0.17	153.4	C2'-endo	4	-0.46	3.88167	35.8069	T
NFY	seq_4	A	2.5	T-C	4.34151	0.3	0.12	151.7	C2'-endo	3	-0.36	not measured	36.5548	T
NFY	seq_4	B	4.5	C-T	4.49313	0.3	0.08	158.8	C2'-endo	4	-0.43	not measured	37.9262	T
NFY	seq_4	B	5.5	T-C	4.2703	0.5	-0.3	161.2	C2'-endo	2	-0.16	not measured	39.2051	C
NFY	seq_4	B	6.5	C-T	4.49449	0.3	0.1	161	C2'-endo	3	-0.32	not measured	38.6575	T
NFY	seq_4	B	7.5	C-C	4.50628	0.1	0.09	166.4	C2'-endo	2	-0.34	not measured	39.1327	C
NFY	seq_40	A	-5.5	C-C	4.59936	0	-0.14	169	C2'-endo	5	-0.73	not measured	38.5108	C
NFY	seq_40	A	-4.5	C-C	4.66578	0	-0.27	170.1	C2'-endo	5	-0.72	not measured	37.9909	C
NFY	seq_40	A	-1.5	C-C	4.59791	0	-0.12	171.4	C2'-endo	5	-0.58	4.1963	39.5333	C
NFY	seq_40	B	0.5	T-T	4.4167	0.2	-0.19	165	C2'-endo	1	-0.55	3.97939	38.0292	T
NFY	seq_40	B	3.5	C-C	4.60946	0	0.25	172.8	C2'-endo	4	-0.56	not measured	39.5147	C
NFY	seq_40	B	6.5	C-T	4.67178	0	0.09	166.9	C2'-endo	3	-0.61	not measured	37.1149	T
NFY	seq_40	B	7.5	C-C	4.53167	0	0.15	170.6	C2'-endo	4	-0.67	not measured	36.6494	C
NFY	seq_41	A	-5.5	C-C	4.45101	0	0.08	150	C2'-endo	3	-0.77	not measured	37.8757	C
NFY	seq_41	B	-3.5	C-T	4.48195	0.1	0.17	140	C1'-exo	3	-0.76	not measured	33.9709	T
NFY	seq_41	A	-1.5	C-C	4.3974	0.1	0.08	153.1	C2'-endo	2	-0.88	4.19634	35.9128	C
NFY	seq_41	B	0.5	T-T	4.15673	0.7	-0.28	136.6	C1'-exo	6	-0.65	3.80754	32.5443	T
NFY	seq_41	B	3.5	T-C	4.15359	0.5	-0.34	150	C2'-endo	3	-0.47	not measured	38.0347	C
NFY	seq_41	B	4.5	C-T	4.36112	0.2	0.11	146.7	C2'-endo	3	-0.78	not measured	35.2353	T
NFY	seq_41	B	5.5	T-C	4.1708	0.6	-0.41	150.3	C2'-endo	3	-0.29	not measured	41.628	C
NFY	seq_41	B	6.5	C-T	4.61051	0	0.24	151.1	C2'-endo	7	-0.72	not measured	37.6481	T
NFY	seq_42	B	-7.5	T-T	4.36013	0.5	-0.03	146.5	C2'-endo	4	-0.47	not measured	37.6961	T
NFY	seq_42	A	-5.5	C-C	4.28119	0.3	-0.03	144.9	C2'-endo	3	-0.49	not measured	33.3467	C
NFY	seq_42	B	-3.5	C-C	4.26707	0.3	-0.02	144.4	C2'-endo	3	-0.49	not measured	33.9076	C
NFY	seq_42	A	-1.5	C-C	4.33901	0.3	0.1	146.3	C2'-endo	2	-0.5	4.00118	36.7479	C
NFY	seq_42	B	0.5	T-T	4.32501	0.6	-0.17	143.3	C1'-exo	4	-0.52	3.98829	36.5458	T
NFY	seq_42	B	3.5	T-C	4.14389	0.7	-0.29	147.4	C2'-endo	3	-0.38	not measured	36.4016	C
NFY	seq_42	B	4.5	C-T	4.33198	0.5	0	148.2	C2'-endo	4	-0.47	not measured	37.2732	T
NFY	seq_42	B	5.5	T-C	4.21484	0.5	-0.18	150.7	C2'-endo	4	-0.22	not measured	38.5849	C
NFY	seq_42	B	6.5	C-T	4.47085	0.2	0.13	150.2	C2'-endo	5	-0.49	not measured	36.8352	T
NFY	seq_42	B	7.5	C-C	4.18239	0.4	-0.07	146.9	C2'-endo	4	-0.53	not measured	35.4152	C
NFY	seq_43	B	-7.5	T-T	4.35085	0.5	0.08	134.7	C1'-exo	6	-0.56	not measured	35.8778	T
NFY	seq_43	B	-4.5	C-C	4.4255	0.1	0.3	143.6	C1'-exo	3	-0.54	not measured	34.1932	C
NFY	seq_43	B	-3.5	T-C	4.33574	0.1	0.08	140.2	C1'-exo	2	-0.62	not measured	33.7154	C
NFY	seq_43	A	-1.5	C-C	4.25656	0.1	-0.01	136.4	C1'-exo	3	-1.31	4.28284	31.2519	C
NFY	seq_43	B	0.5	T-T	4.133	0.9	-0.27	133.3	C1'-exo	7	-0.63	3.79143	34.2765	T
NFY	seq_43	B	3.5	T-C	4.18047	0.5	-0.09	145.9	C2'-endo	5	-0.44	not measured	35.6339	C
NFY	seq_43	B	4.5	C-T	4.31031	0.3	0.06	139.8	C1'-exo	3	-0.89	not measured	35.6391	T
NFY	seq_43	B	7.5	T-C	4.11212	0.7	-0.24	137.8	C1'-exo	5	-0.49	not measured	34.4627	C
NFY	seq_44	A	-7.5	C-T	4.47911	0.2	-0.07	160	C2'-endo	3	-0.52	not measured	36.8868	C
NFY	seq_44	A	-6.5	T-C	4.17235	0.6	0.42	154.8	C2'-endo	3	-0.36	not measured	38.327	T
NFY	seq_44	A	-5.5	C-C	4.47731	0	0.05	153.9	C2'-endo	5	-0.86	not measured	37.5527	C
NFY	seq_44	B	-3.5	T-T	4.32175	0.4	-0.25	146.5	C2'-endo	3	-0.69	not measured	34.4433	T
NFY	seq_44	A	-1.5	C-C	4.41749	0	0.04	150.1	C2'-endo	3	-1.2	4.28743	33.1151	C
NFY	seq_44	B	0.5	T-T	4.29714	0.3	-0.24	147.2	C2'-endo	3	-0.8	4.0251	33.7983	T
NFY	seq_44	B	3.5	T-C	4.21128	0.3	-0.29	155.7	C2'-endo	3	-0.58	not measured	37.0737	C
NFY	seq_44	B	4.5	C-T	4.39352	0.2	0.02	153.2	C2'-endo	3	-0.75	not measured	36.3116	T
NFY	seq_44	B	5.5	T-C	4.15279	0.5	-0.39	155.4	C2'-endo	4	-0.36	not measured	39.4321	C
NFY	seq_44	B	6.5	C-T	4.48427	0.1	0.1	155.6	C2'-endo	4	-0.61	not measured	37.1297	T
NFY	seq_44	B	7.5	C-C	4.43139	0.1	0.04	159.5	C2'-endo	2	-0.49	not measured	39.1413	C
NFY	seq_45	A	-7.5	C-T	4.60052	0.1	-0.1	176.9	C2'-endo	5	-0.34	not measured	40.8185	C
NFY	seq_45	A	-6.5	T-C	4.41562	0.2	0.19	174.3	C2'-endo	1	-0.13	not measured	41.942	T
NFY	seq_45	A	-5.5	C-C	4.59299	0	-0.06	176.4	C2'-endo	5	-0.25	not measured	42.6336	C
NFY	seq_45	A	-4.5	C-C	4.65594	0	-0.21	176.4	C2'-endo	6	-0.26	not measured	42.4463	C
NFY	seq_45	A	-1.5	C-C	4.50723	0	-0.12	176	C2'-endo	2	-0.53	4.03622	38.6401	C
NFY	seq_45	B	0.5	T-T	4.36016	0.3	-0.15	172.5	C2'-endo	1	-0.46	3.8851	38.8466	T
NFY	seq_45	B	3.5	T-C	4.33758	0.2	-0.15	176.7	C2'-endo	1	-0.16	not measured	41.7446	C
NFY	seq_45	B	4.5	C-T	4.44335	0.1	0.04	173.3	C2'-endo	3	-0.4	not measured	41.1991	T
NFY	seq_45	B	5.5	T-C	4.32883	0.2	-0.15	176.3	C2'-endo	2	-0.11	not measured	43.0031	C
NFY	seq_45	B	6.5	C-T	4.59333	0	0.14	174.8	C2'-endo	6	-0.45	not measured	41.5033	T
NFY	seq_46	A	-7.5	T-C	4.03821	0.4	0.26	151	C2'-endo	7	-0.58	not measured	34.8656	T
NFY	seq_46	A	-6.5	C-C	4.20058	0.1	0.12	151.7	C2'-endo	2	-0.93	not measured	34.3006	C
NFY	seq_46	A	-5.5	C-C	4.58744	0	-0.21	151	C2'-endo	5	-0.92	not measured	36.7029	C
NFY	seq_46	B	-3.5	C-T	4.64605	0	0.17	149.8	C2'-endo	7	-1	not measured	36.6347	T
NFY	seq_46	A	-1.5	C-C	4.42582	0	-0.05	154.5	C2'-endo	2	-1.01	4.18018	35.1713	C
NFY	seq_46	B	0.5	T-T	4.08914	0.5	-0.3	144.2	C2'-endo	7	-0.83	3.77726	31.2293	T
NFY	seq_46	B	3.5	T-C	4.21247	0.1	-0.04	155.9	C2'-endo	4	-0.78	not measured	35.6203	C
NFY	seq_46	B	6.5	C-T	4.49767	0	0.13	149.6	C2'-endo	3	-0.89	not measured	34.8347	T
NFY	seq_46	B	7.5	C-C	4.48235	0	0.17	155.1	C2'-endo	3	-0.91	not measured	36.2191	C
NFY	seq_47	A	-5.5	C-C	4.5797	0	-0.18	163.3	C2'-endo	5	-0.78	not measured	37.9163	C
NFY	seq_47	B	-3.5	C-T	4.70663	0	0.2	162.3	C2'-endo	8	-0.74	not measured	38.4371	T
NFY	seq_47	A	-1.5	C-C	4.54816	0	-0.1	164.7	C2'-endo	6	-0.92	4.37033	37.1419	C
NFY	seq_47	B	0.5	T-T	4.3708	0.3	-0.2	158.1	C2'-endo	3	-0.71	4.06775	36.6246	T
NFY	seq_47	B	3.5	T-C	4.30097	0.2	-0.12	164.6	C2'-endo	2	-0.67	not measured	36.3096	C
NFY	seq_47	B	4.5	T-T	4.22502	0.7	-0.34	157.6	C2'-endo	2	-0.55	not measured	38.1835	T
NFY	seq_47	B	5.5	T-T	4.33923	0.5	-0.16	159.3	C2'-endo	3	-0.49	not measured	38.5804	T
NFY	seq_47	B	6.5	C-T	4.68453	0	0.24	163.3	C2'-endo	9	-0.8	not measured	38.9597	T
NFY	seq_48	B	-7.5	C-T	4.41537	0.2	0.07	83.6	O4'-endo	3	-0.88	not measured	35.0189	T
NFY	seq_48	A	-5.5	C-C	4.40376	0.1	-0.06	147.7	C2'-endo	2	-0.53	not measured	36.9677	C
NFY	seq_48	B	-3.5	C-C	4.38932	0.1	0.08	141.8	C1'-exo	1	-0.75	not measured	34.2013	C
NFY	seq_48	A	-1.5	C-C	4.32164	0.1	0.04	147.4	C2'-endo	1	-0.92	4.0832	34.3457	C
NFY	seq_48	B	0.5	T-T	4.1559	0.8	-0.38	134.1	C1'-exo	5	-0.68	3.8732	35.3173	T
NFY	seq_48	B	3.5	T-C	4.19073	0.3	-0.13	141.8	C1'-exo	3	-0.73	not measured	34.2316	C
NFY	seq_48	B	6.5	C-T	4.43041	0.3	0.08	135.6	C1'-exo	4	-0.74	not measured	34.5771	T
NFY	seq_48	B	7.5	C-C	4.3477	0.2	-0.08	141.9	C1'-exo	1	-0.68	not measured	37.1684	C
NFY	seq_49	A	-6.5	C-T	4.42582	0.3	-0.1	148.5	C2'-endo	3	-0.55	not measured	36.516	C
NFY	seq_49	A	-1.5	C-C	4.2206	0.3	0.17	142.4	C1'-exo	0	-0.91	4.06687	33.9288	C
NFY	seq_49	B	0.5	T-T	4.17394	0.7	-0.21	139.7	C1'-exo	4	-0.72	3.92658	34.0132	T
NFY	seq_49	B	3.5	T-C	4.07638	0.7	-0.35	145.4	C2'-endo	4	-0.48	not measured	34.7498	C
NFY	seq_49	B	4.5	C-T	4.39623	0.2	0.13	146.8	C2'-endo	3	-0.74	not measured	34.9781	T
NFY	seq_49	B	5.5	C-C	4.31446	0.1	0.11	147.7	C2'-endo	1	-0.67	not measured	33.6111	C
NFY	seq_49	B	6.5	C-C	4.26814	0.2	-0.07	148.4	C2'-endo	1	-0.71	not measured	34.5532	C
NFY	seq_5	A	-5.5	C-C	4.5616	0	-0.15	151.9	C2'-endo	5	-1.04	not measured	37.0659	C
NFY	seq_5	B	-3.5	C-T	4.63649	0	0.25	143.8	C1'-exo	5	-1.01	not measured	33.9499	T
NFY	seq_5	A	-1.5	C-C	4.49086	0	-0.03	154.4	C2'-endo	4	-1.1	4.37128	34.8979	C
NFY	seq_5	B	0.5	T-T	4.13799	0.5	-0.26	136.7	C1'-exo	6	-0.85	3.87209	31.0097	T
NFY	seq_5	B	3.5	T-C	4.2212	0.3	-0.19	150	C2'-endo	3	-0.66	not measured	36.8442	C
NFY	seq_5	B	4.5	C-T	4.41092	0.1	0.16	145.5	C2'-endo	2	-0.99	not measured	34.0195	T
NFY	seq_5	B	5.5	T-C	4.17501	0.5	-0.33	147.9	C2'-endo	3	-0.5	not measured	38.436	C
NFY	seq_5	B	6.5	C-T	4.62336	0	0.23	148.5	C2'-endo	7	-0.88	not measured	36.1845	T
NFY	seq_50	A	-7.5	T-T	4.18444	1	0.36	153.8	C2'-endo	4	-0.17	not measured	40.2959	T
NFY	seq_50	A	-6.5	T-C	4.15441	0.7	0.28	150.9	C2'-endo	3	-0.18	not measured	38.5672	T
NFY	seq_50	A	-5.5	C-C	4.32564	0.1	-0.04	154.1	C2'-endo	1	-0.45	not measured	37.4303	C
NFY	seq_50	A	-2.5	T-C	4.16279	0.5	0.25	143.5	C1'-exo	5	-0.43	not measured	35.9567	T
NFY	seq_50	A	-1.5	C-C	4.30637	0.2	0.01	151.3	C2'-endo	1	-0.72	4.01396	34.3765	C
NFY	seq_50	B	0.5	T-T	4.2893	0.6	-0.21	146	C2'-endo	4	-0.49	3.882	36.091	T
NFY	seq_50	B	3.5	T-C	4.20362	0.7	-0.36	152.6	C2'-endo	2	-0.29	not measured	37.9257	C
NFY	seq_50	B	4.5	C-T	4.31298	0.4	0.01	148	C2'-endo	3	-0.57	not measured	35.7994	T
NFY	seq_50	B	5.5	T-C	4.23983	0.5	-0.29	156.1	C2'-endo	3	-0.1	not measured	40.0771	C
NFY	seq_50	B	6.5	C-T	4.45823	0.2	0.21	153.4	C2'-endo	3	-0.49	not measured	36.2801	T
NFY	seq_50	B	7.5	T-C	4.18896	0.6	-0.2	154.3	C2'-endo	3	-0.18	not measured	38.1487	C
NFY	seq_51	A	-7.5	T-T	4.32802	0.5	0.07	153.9	C2'-endo	4	-0.48	not measured	37.019	T
NFY	seq_51	A	-6.5	T-C	4.16008	0.5	0.3	149.3	C2'-endo	4	-0.31	not measured	38.6509	T
NFY	seq_51	A	-5.5	C-T	4.42811	0.2	-0.06	152.6	C2'-endo	4	-0.65	not measured	35.9552	C
NFY	seq_51	B	-3.5	C-C	4.3982	0	0.12	154.7	C2'-endo	1	-0.82	not measured	35.4051	C
NFY	seq_51	A	-1.5	C-C	4.40268	0	-0.1	154.8	C2'-endo	2	-0.82	4.13158	35.6811	C
NFY	seq_51	B	0.5	T-T	4.25905	0.5	-0.22	147.7	C2'-endo	4	-0.66	3.89763	35.0976	T
NFY	seq_51	B	3.5	T-C	4.23631	0.3	-0.08	156.1	C2'-endo	4	-0.42	not measured	36.6514	C
NFY	seq_51	B	4.5	T-T	4.12992	1.1	-0.48	149.6	C2'-endo	4	-0.28	not measured	40.9037	T
NFY	seq_51	B	5.5	T-T	4.32479	0.7	-0.23	150.1	C2'-endo	4	-0.15	not measured	40.1101	T
NFY	seq_51	B	6.5	C-T	4.5935	0.1	0.18	154.9	C2'-endo	6	-0.52	not measured	38.9308	T
NFY	seq_51	B	7.5	T-C	4.37772	0.2	-0.1	155.9	C2'-endo	2	-0.45	not measured	38.6796	C
NFY	seq_52	A	-7.5	C-T	4.52287	0.1	-0.22	160.7	C2'-endo	3	-0.54	not measured	36.6049	C
NFY	seq_52	A	-6.5	T-C	4.16079	0.6	0.31	156.6	C2'-endo	5	-0.26	not measured	37.3159	T
NFY	seq_52	A	-5.5	C-C	4.29341	0.2	0.1	157.6	C2'-endo	0	-0.48	not measured	37.0897	C
NFY	seq_52	A	-4.5	C-C	4.51089	0.1	-0.02	156.7	C2'-endo	4	-0.6	not measured	38.7873	C
NFY	seq_52	A	-1.5	C-C	4.37057	0	0	159.3	C2'-endo	2	-0.93	4.17127	33.4675	C
NFY	seq_52	B	0.5	T-T	4.16146	0.6	-0.24	148.5	C2'-endo	5	-0.67	3.833	33.1652	T
NFY	seq_52	B	3.5	T-C	4.10991	0.4	-0.13	158.8	C2'-endo	8	-0.38	not measured	35.445	C
NFY	seq_52	B	4.5	T-T	4.17977	0.7	-0.19	150.6	C2'-endo	4	-0.58	not measured	35.7508	T
NFY	seq_52	B	7.5	C-C	4.50463	0.1	-0.04	157.8	C2'-endo	3	-0.61	not measured	36.3905	C
NFY	seq_53	B	-7.5	C-C	4.43398	0.1	0.09	157.2	C2'-endo	2	-0.38	not measured	39.4913	C
NFY	seq_53	A	-5.5	C-C	4.38345	0.1	0.07	156.2	C2'-endo	3	-0.64	not measured	39.5617	C
NFY	seq_53	A	-2.5	T-C	4.01194	0.4	0.2	148.8	C2'-endo	7	-0.74	not measured	32.1613	T
NFY	seq_53	A	-1.5	C-C	4.104	0.1	0.04	147.5	C2'-endo	7	-0.97	3.8252	30.2985	C
NFY	seq_53	B	0.5	T-T	3.95955	0.8	-0.34	139.7	C1'-exo	12	-0.7	3.59285	28.7409	T
NFY	seq_53	B	3.5	T-C	4.10141	0.3	-0.17	151.3	C2'-endo	6	-0.66	not measured	34.2501	C
NFY	seq_53	B	4.5	C-T	4.22915	0.3	-0.03	146.6	C2'-endo	3	-0.98	not measured	34.1094	T
NFY	seq_53	B	5.5	T-C	4.05726	0.6	-0.32	150.4	C2'-endo	5	-0.45	not measured	37.1835	C
NFY	seq_53	B	6.5	T-T	4.12112	0.9	-0.35	146	C2'-endo	6	-0.45	not measured	36.1752	T
NFY	seq_53	B	7.5	C-T	4.37622	0.1	0.13	147.3	C2'-endo	3	-0.76	not measured	34.7732	T
NFY	seq_54	B	-6.5	C-C	4.36942	0.1	0.12	154.9	C2'-endo	2	-0.59	not measured	35.1948	C
NFY	seq_54	B	-3.5	T-C	4.16496	0.3	-0.12	150	C2'-endo	4	-0.67	not measured	33.5991	C
NFY	seq_54	A	-1.5	C-C	4.24145	0.1	-0.05	139.1	C1'-exo	4	-0.95	3.98469	30.8605	C
NFY	seq_54	B	0.5	T-T	4.14223	0.7	-0.22	141.3	C1'-exo	6	-0.67	3.79541	33.3164	T
NFY	seq_54	B	3.5	T-C	4.19155	0.3	-0.12	151.9	C2'-endo	3	-0.63	not measured	35.187	C
NFY	seq_54	B	6.5	C-T	4.41466	0.3	-0.02	147.2	C2'-endo	4	-0.77	not measured	37.248	T
NFY	seq_54	B	7.5	C-C	4.35378	0.1	-0.06	150.3	C2'-endo	2	-0.67	not measured	37.1846	C
NFY	seq_55	B	-7.5	C-C	4.35177	0.1	0.14	140.2	C1'-exo	4	-0.71	not measured	32.6626	C
NFY	seq_55	A	-5.5	T-C	4.1973	0.5	0.24	139.7	C1'-exo	2	-0.65	not measured	35.0723	T
NFY	seq_55	B	-3.5	T-T	4.26602	0.7	-0.22	125.7	C1'-exo	4	-0.71	not measured	32.6185	T
NFY	seq_55	A	-1.5	C-C	4.30564	0.1	0.08	131.6	C1'-exo	3	-1.25	4.30587	30.6864	C
NFY	seq_55	B	0.5	T-T	4.11469	1	-0.41	126.5	C1'-exo	6	-0.7	3.86853	32.2106	T
NFY	seq_55	B	3.5	T-C	4.12394	0.7	-0.25	139.3	C1'-exo	4	-0.62	not measured	34.8992	C
NFY	seq_55	B	6.5	C-T	4.57504	0.2	0.17	138.3	C1'-exo	6	-0.64	not measured	35.2245	T
NFY	seq_55	B	7.5	C-C	4.36672	0.2	0.02	136	C1'-exo	1	-0.87	not measured	33.8987	C
NFY	seq_56	B	-7.5	C-C	4.32737	0	0.06	151.8	C2'-endo	2	-0.89	not measured	34.0286	C
NFY	seq_56	A	-5.5	C-C	4.35694	0.1	0.11	152.1	C2'-endo	2	-0.99	not measured	34.9085	C
NFY	seq_56	A	-4.5	C-C	4.50659	0	-0.16	149.8	C2'-endo	4	-1.12	not measured	34.59	C
NFY	seq_56	A	-1.5	C-C	4.32146	0	0.04	156.6	C2'-endo	1	-0.97	4.07605	35.4238	C
NFY	seq_56	B	0.5	T-T	4.08335	0.7	-0.41	143.1	C1'-exo	6	-0.73	3.73199	34.511	T
NFY	seq_56	B	3.5	T-C	4.23051	0.2	-0.11	154.6	C2'-endo	2	-0.6	not measured	38.6673	C
NFY	seq_56	B	6.5	C-T	4.48211	0.1	0.06	149	C2'-endo	6	-0.86	not measured	37.6275	T
NFY	seq_57	A	-7.5	T-C	4.05271	0.8	0.28	149.4	C2'-endo	5	-0.27	not measured	37.4676	T
NFY	seq_57	A	-6.5	C-T	4.28064	0.4	-0.1	147	C2'-endo	5	-0.46	not measured	35.45	C
NFY	seq_57	A	-5.5	T-C	4.09768	0.8	0.36	146.4	C2'-endo	6	-0.23	not measured	36.1084	T
NFY	seq_57	A	-2.5	C-C	4.25858	0.2	0.04	138.3	C1'-exo	2	-0.95	not measured	33.7189	C
NFY	seq_57	A	-1.5	C-C	4.32749	0.1	-0.04	146.8	C2'-endo	2	-1.12	4.25265	32.556	C
NFY	seq_57	B	0.5	T-T	4.17207	0.7	-0.24	139.5	C1'-exo	5	-0.7	3.86602	33.4284	T
NFY	seq_57	B	3.5	T-C	4.1238	0.5	-0.2	145.6	C2'-endo	6	-0.59	not measured	33.0315	C
NFY	seq_57	B	4.5	C-T	4.33903	0.3	0.13	143.9	C1'-exo	3	-0.86	not measured	32.6015	T
NFY	seq_57	B	5.5	T-C	4.08718	0.6	-0.3	143.3	C1'-exo	5	-0.55	not measured	34.2429	C
NFY	seq_57	B	6.5	C-T	4.44502	0.3	0.07	146.2	C2'-endo	3	-0.66	not measured	35.0927	T
NFY	seq_57	B	7.5	C-C	4.24297	0.2	0.04	141.5	C1'-exo	2	-0.79	not measured	31.5969	C
NFY	seq_58	A	-7.5	T-T	4.29795	0.7	0.18	142.3	C1'-exo	4	-0.37	not measured	36.7595	T
NFY	seq_58	B	-5.5	C-T	4.54951	0.1	0.28	150.6	C2'-endo	5	-0.75	not measured	34.8788	T
NFY	seq_58	B	-4.5	C-C	4.21772	0.2	-0.07	146.5	C2'-endo	1	-0.73	not measured	34.3912	C
NFY	seq_58	B	-3.5	T-C	4.12189	0.6	-0.25	147.8	C2'-endo	4	-0.41	not measured	35.9215	C
NFY	seq_58	A	-1.5	C-C	4.21606	0.1	0.09	132.8	C1'-exo	3	-1.14	4.17919	29.077	C
NFY	seq_58	B	0.5	T-T	4.20295	0.8	-0.26	140.3	C1'-exo	5	-0.49	3.84234	34.9732	T
NFY	seq_58	B	3.5	T-C	4.17489	0.5	-0.21	149.1	C2'-endo	3	-0.42	not measured	34.8089	C
NFY	seq_58	B	4.5	T-T	4.08689	1.3	-0.46	142.8	C1'-exo	5	-0.24	not measured	38.3646	T
NFY	seq_58	B	5.5	T-T	4.24858	0.8	-0.15	146.6	C2'-endo	4	-0.2	not measured	38.1797	T
NFY	seq_58	B	6.5	C-T	4.62032	0	0.36	153	C2'-endo	7	-0.54	not measured	37.728	T
NFY	seq_59	B	-6.5	C-C	4.42128	0.1	0.13	154.4	C2'-endo	2	-0.28	not measured	39.2418	C
NFY	seq_59	A	-2.5	C-C	4.20008	0.1	0	148.7	C2'-endo	3	-0.77	not measured	33.9474	C
NFY	seq_59	A	-1.5	C-C	4.20539	0.1	0.02	145.9	C2'-endo	3	-0.89	3.94817	32.5627	C
NFY	seq_59	B	0.5	T-T	4.10214	0.7	-0.3	137.7	C1'-exo	5	-0.69	3.80164	32.9467	T
NFY	seq_59	B	3.5	T-C	3.9872	0.6	-0.28	147.7	C2'-endo	8	-0.51	not measured	35.4563	C
NFY	seq_59	B	4.5	C-T	4.31392	0.2	0.07	146.6	C2'-endo	3	-0.8	not measured	36.6023	T
NFY	seq_59	B	7.5	C-C	4.47184	0.1	0.13	155	C2'-endo	1	-0.37	not measured	40.3624	C
NFY	seq_6	A	-5.5	C-T	4.54727	0	-0.14	161.4	C2'-endo	7	-0.65	not measured	38.9261	C
NFY	seq_6	B	-3.5	C-C	4.47268	0	0.16	160.8	C2'-endo	4	-0.73	not measured	37.8964	C
NFY	seq_6	A	-1.5	C-C	4.43073	0	-0.08	162.2	C2'-endo	3	-0.81	4.08547	37.7185	C
NFY	seq_6	B	0.5	T-T	4.27427	0.4	-0.27	151.8	C2'-endo	3	-0.74	3.97373	38.1005	T
NFY	seq_6	A	2.5	T-C	4.33069	0.1	0.12	153.3	C2'-endo	1	-0.52	not measured	39.1164	T
NFY	seq_6	B	6.5	C-T	4.53786	0.1	0.05	155.1	C2'-endo	5	-0.69	not measured	37.3758	T
NFY	seq_6	B	7.5	T-C	4.38801	0.1	-0.14	160	C2'-endo	1	-0.32	not measured	39.6788	C
NFY	seq_60	B	-7.5	T-T	4.57674	0.1	-0.13	124.4	C1'-exo	4	-0.57	not measured	38.0301	T
NFY	seq_60	B	-6.5	C-T	4.6702	0	0.25	150.9	C2'-endo	8	-1.16	not measured	36.13	T
NFY	seq_60	A	-4.5	C-T	4.70378	0	-0.12	159.3	C2'-endo	9	-1.07	not measured	37.9029	C
NFY	seq_60	A	-1.5	C-C	4.45823	0	0	155.4	C2'-endo	5	-1.31	4.35001	36.0332	C
NFY	seq_60	B	0.5	T-T	4.0547	0.7	-0.62	143.2	C1'-exo	5	-0.78	3.72287	35.5056	T
NFY	seq_60	B	3.5	T-C	4.34282	0.1	-0.11	155.5	C2'-endo	1	-0.64	not measured	39.8705	C
NFY	seq_60	B	4.5	C-T	4.43431	0.1	-0.07	150.3	C2'-endo	5	-1.08	not measured	37.715	T
NFY	seq_60	B	5.5	T-C	4.28805	0.3	-0.28	155.6	C2'-endo	1	-0.39	not measured	43.5065	C
NFY	seq_60	B	6.5	C-T	4.51119	0.1	0.02	152.5	C2'-endo	5	-0.8	not measured	38.6883	T
NFY	seq_60	B	7.5	T-C	4.32488	0.2	-0.26	156	C2'-endo	1	-0.37	not measured	42.5162	C
NFY	seq_7	A	-7.5	T-C	4.30042	0.5	0.1	142.8	C1'-exo	2	-0.27	not measured	37.3777	T
NFY	seq_7	A	-6.5	C-T	4.48296	0.5	-0.03	148.6	C2'-endo	3	-0.19	not measured	39.8471	C
NFY	seq_7	A	-5.5	T-C	4.19587	1.5	0.63	151.6	C2'-endo	5	0.22	not measured	39.3334	T
NFY	seq_7	B	-3.5	C-T	4.49193	0.4	0.21	148.7	C2'-endo	4	-0.47	not measured	35.5186	T
NFY	seq_7	A	-1.5	C-C	4.26718	0.7	0.19	147.3	C2'-endo	4	-0.35	3.87036	35.01	C
NFY	seq_7	B	0.5	T-T	4.28234	0.8	-0.05	138.7	C1'-exo	4	-0.41	3.91855	34.5532	T
NFY	seq_7	A	2.5	T-C	4.35908	0.5	0.04	143.4	C1'-exo	2	-0.22	not measured	38.0208	T
NFY	seq_7	B	4.5	C-C	4.34671	0.4	0.11	149.5	C2'-endo	3	-0.19	not measured	35.5192	C
NFY	seq_7	B	5.5	T-C	4.13642	1.3	-0.69	142.5	C1'-exo	5	0.24	not measured	40.6402	C
NFY	seq_7	B	6.5	C-T	4.62816	0.2	0.4	152.1	C2'-endo	5	-0.23	not measured	36.617	T
NFY	seq_8	A	-6.5	T-C	4.31059	0.3	0.22	162.4	C2'-endo	2	-0.06	not measured	40.8361	T
NFY	seq_8	A	-5.5	C-C	4.45294	0.1	-0.05	167.3	C2'-endo	0	-0.13	not measured	41.0364	C
NFY	seq_8	B	-3.5	C-C	4.74506	0	0.31	167.3	C2'-endo	5	-0.51	not measured	38.0196	C
NFY	seq_8	A	-1.5	C-C	4.65872	0	-0.25	164.1	C2'-endo	5	-0.77	4.37579	36.2855	C
NFY	seq_8	B	0.5	T-T	4.39348	0.3	-0.17	158.4	C2'-endo	2	-0.53	4.02818	37.0715	T
NFY	seq_8	A	2.5	T-C	4.38215	0	0.05	157.7	C2'-endo	5	-0.54	not measured	36.5603	T
NFY	seq_8	B	4.5	C-C	4.45465	0	0.04	162.7	C2'-endo	3	-0.8	not measured	35.6569	C
NFY	seq_8	B	5.5	T-C	4.18006	0.3	-0.27	161.7	C2'-endo	6	-0.35	not measured	37.5678	C
NFY	seq_8	B	6.5	C-T	4.49195	0.1	0.07	161.5	C2'-endo	3	-0.43	not measured	38.3023	T
NFY	seq_8	B	7.5	C-C	4.43614	0	0.13	166.7	C2'-endo	1	-0.37	not measured	37.9078	C
NFY	seq_9	A	-7.5	C-C	4.37995	0.1	-0.02	165.7	C2'-endo	1	-0.5	not measured	36.5425	C
NFY	seq_9	A	-6.5	C-C	4.39547	0.1	-0.03	162.4	C2'-endo	1	-0.54	not measured	34.7656	C
NFY	seq_9	B	-4.5	C-T	4.56847	0.1	0.13	157.4	C2'-endo	4	-0.58	not measured	35.8818	T
NFY	seq_9	B	-3.5	C-C	4.4172	0	0.05	161.2	C2'-endo	2	-0.53	not measured	36.7217	C
NFY	seq_9	A	-1.5	C-C	4.44111	0.1	-0.07	164.9	C2'-endo	2	-0.54	4.04144	38.1025	C
NFY	seq_9	B	0.5	T-T	4.3612	0.4	-0.04	153.6	C2'-endo	3	-0.51	3.94748	35.1446	T
NFY	seq_9	A	2.5	T-C	4.32157	0.2	0.1	150.8	C2'-endo	2	-0.56	not measured	36.2101	T
NFY	seq_9	B	4.5	T-T	4.29228	0.6	-0.25	153.4	C2'-endo	3	-0.51	not measured	35.882	T
NFY	seq_9	B	5.5	T-T	4.29391	0.7	-0.28	153.1	C2'-endo	3	-0.39	not measured	37.1888	T
NFY	seq_9	B	6.5	C-T	4.50766	0.2	0.06	158	C2'-endo	4	-0.48	not measured	37.3941	T
NFY	seq_9	B	7.5	C-C	4.37516	0.1	0.05	162.7	C2'-endo	1	-0.43	not measured	37.8236	C
TBP	seq_1	A	-3.5	C-T	4.47718	0.2	-0.13	169	C2'-endo	5	-0.52	not measured	40.2154	C
TBP	seq_1	B	0.5	T-T	4.25114	0.6	-0.17	160	C2'-endo	3	-0.52	3.84554	38.4002	T
TBP	seq_1	B	1.5	T-T	4.22657	0.7	-0.23	158.2	C2'-endo	3	-0.47	3.82696	39.7451	T
TBP	seq_1	B	2.5	T-T	4.33205	0.5	-0.14	159.7	C2'-endo	4	-0.36	3.85368	39.8987	T
TBP	seq_1	B	3.5	C-T	4.56193	0.1	0.19	163.2	C2'-endo	6	-0.54	not measured	39.2731	T
TBP	seq_1	B	4.5	C-C	4.51317	0	0.13	168.4	C2'-endo	4	-0.46	not measured	40.885	C
TBP	seq_10	B	-5.5	C-C	4.58094	0	0.32	158.4	C2'-endo	3	-0.79	not measured	35.9252	C
TBP	seq_10	B	-4.5	C-C	4.38073	0	0.13	155.4	C2'-endo	2	-0.96	not measured	35.375	C
TBP	seq_10	B	0.5	T-T	4.18947	0.5	-0.16	147.8	C2'-endo	4	-0.76	3.87111	34.5633	T
TBP	seq_10	B	1.5	T-T	4.18242	0.5	-0.26	145.6	C2'-endo	3	-0.82	3.9158	34.4512	T
TBP	seq_10	B	4.5	C-C	4.37215	0	0.08	154.5	C2'-endo	3	-1.02	not measured	34.3726	C
TBP	seq_10	B	5.5	T-C	4.04645	0.5	-0.39	149.3	C2'-endo	4	-0.66	not measured	35.5299	C
TBP	seq_10	B	6.5	C-T	4.37636	0.2	0.04	149.6	C2'-endo	4	-0.79	not measured	35.1282	T
TBP	seq_11	A	-7.5	C-C	4.47549	0	-0.07	160.5	C2'-endo	1	-0.33	not measured	41.4792	C
TBP	seq_11	A	-6.5	C-T	4.57873	0.1	-0.13	159.5	C2'-endo	6	-0.51	not measured	39.2034	C
TBP	seq_11	A	-5.5	T-T	4.3012	0.7	0.29	154.7	C2'-endo	5	-0.37	not measured	39.5767	T
TBP	seq_11	B	0.5	T-T	4.13362	0.8	-0.27	150.8	C2'-endo	8	-0.41	3.59684	37.5223	T
TBP	seq_11	B	1.5	T-T	4.26163	0.6	-0.23	151.7	C2'-endo	4	-0.46	3.77197	38.3563	T
TBP	seq_11	B	2.5	C-T	4.48316	0.1	0.12	151.7	C2'-endo	4	-0.71	4.11907	37.4853	T
TBP	seq_11	B	3.5	C-C	4.48075	0	0.08	160.6	C2'-endo	2	-0.54	not measured	40.3302	C
TBP	seq_11	A	5.5	C-C	4.51134	0	-0.13	160.2	C2'-endo	2	-0.53	not measured	39.3721	C
TBP	seq_12	B	-6.5	C-T	4.81792	0	0.05	157.4	C2'-endo	10	-0.41	not measured	43.2012	T
TBP	seq_12	B	-5.5	T-C	4.50942	0	0.06	160.8	C2'-endo	2	-0.33	not measured	41.7422	C
TBP	seq_12	B	-4.5	C-T	4.47422	0.1	0	152.8	C2'-endo	4	-0.92	not measured	38.1576	T
TBP	seq_12	B	0.5	T-T	4.23382	0.5	-0.2	147.5	C2'-endo	2	-0.65	3.91997	36.7026	T
TBP	seq_12	B	1.5	T-T	4.31627	0.4	-0.13	149.1	C2'-endo	3	-0.67	4.00924	37.2809	T
TBP	seq_12	B	2.5	T-T	4.35561	0.3	-0.1	147.2	C2'-endo	4	-0.7	4.04349	38.1183	T
TBP	seq_12	A	4.5	C-C	4.54947	0	-0.12	153.4	C2'-endo	5	-0.8	not measured	37.3241	C
TBP	seq_12	A	5.5	C-C	5.17336	0	-0.35	158.2	C2'-endo	12	0.27	not measured	45.7123	C
TBP	seq_13	A	-7.5	C-T	4.6281	0.2	-0.01	165.4	C2'-endo	7	-0.25	not measured	42.1303	C
TBP	seq_13	A	-6.5	T-C	4.50095	0.3	0.17	161.5	C2'-endo	4	-0.01	not measured	44.5712	T
TBP	seq_13	A	-5.5	C-C	4.6399	0	-0.12	165.5	C2'-endo	8	-0.18	not measured	44.6754	C
TBP	seq_13	B	0.5	T-T	4.16603	0.9	-0.31	155	C2'-endo	5	-0.31	3.65577	39.6185	T
TBP	seq_13	B	1.5	T-T	4.23522	0.7	-0.18	156.1	C2'-endo	4	-0.32	3.71002	39.6837	T
TBP	seq_13	B	2.5	T-T	4.3531	0.5	-0.05	156.6	C2'-endo	4	-0.37	3.83767	39.3761	T
TBP	seq_13	B	3.5	C-T	4.52905	0.1	0.16	158.7	C2'-endo	7	-0.68	not measured	39.1135	T
TBP	seq_13	B	6.5	C-C	4.46735	0.1	0	163.5	C2'-endo	3	-0.19	not measured	41.8124	C
TBP	seq_14	A	-5.5	C-T	4.46421	0.2	-0.1	156.9	C2'-endo	6	-0.62	not measured	37.8076	C
TBP	seq_14	B	0.5	T-T	4.15316	0.8	-0.18	146.7	C2'-endo	3	-0.64	3.87498	36.3905	T
TBP	seq_14	B	1.5	T-T	4.20554	0.7	-0.21	146.5	C2'-endo	3	-0.69	3.93941	37.1829	T
TBP	seq_14	B	6.5	C-C	4.39916	0.1	0.15	157	C2'-endo	1	-0.6	not measured	35.9705	C
TBP	seq_15	B	-7.5	T-C	4.30345	0.3	-0.12	156.2	C2'-endo	6	-0.24	not measured	36.8021	C
TBP	seq_15	A	-5.5	T-C	4.11696	0.6	0.32	146.9	C2'-endo	4	-0.49	not measured	38.1323	T
TBP	seq_15	A	-4.5	C-C	4.27942	0.1	-0.07	152.1	C2'-endo	4	-0.92	not measured	35.3553	C
TBP	seq_15	A	-3.5	C-T	4.53674	0	-0.31	154.9	C2'-endo	4	-0.74	not measured	34.9105	C
TBP	seq_15	B	0.5	T-T	4.26391	0.5	-0.22	147.4	C2'-endo	3	-0.68	3.96214	35.3048	T
TBP	seq_15	B	1.5	T-T	4.17309	0.6	-0.29	140.8	C1'-exo	2	-0.87	4.01715	33.2466	T
TBP	seq_15	A	5.5	C-C	4.52162	0	-0.15	147.3	C2'-endo	7	-1.19	not measured	36.8454	C
TBP	seq_15	A	6.5	C-C	4.76499	0	-0.49	157.4	C2'-endo	7	-0.8	not measured	36.0192	C
TBP	seq_16	B	-7.5	C-C	4.55044	0	0.18	159	C2'-endo	6	-0.59	not measured	41.7707	C
TBP	seq_16	B	-6.5	T-C	4.24987	0.4	-0.23	153.9	C2'-endo	1	-0.31	not measured	41.2399	C
TBP	seq_16	B	-5.5	T-T	4.2638	0.5	-0.18	149.3	C2'-endo	5	-0.52	not measured	37.0984	T
TBP	seq_16	B	-4.5	C-T	4.45874	0	0.21	147.9	C2'-endo	4	-0.99	not measured	36.4636	T
TBP	seq_16	B	0.5	T-T	4.05931	0.7	-0.37	144.8	C2'-endo	4	-0.68	3.72507	36.7144	T
TBP	seq_16	B	1.5	T-T	4.10395	0.6	-0.24	145.2	C2'-endo	3	-0.68	3.76733	36.2791	T
TBP	seq_16	B	2.5	T-T	4.1414	0.6	-0.19	144.8	C2'-endo	4	-0.6	3.72557	37.3176	T
TBP	seq_16	B	3.5	T-T	4.25045	0.4	-0.12	147.5	C2'-endo	4	-0.68	not measured	37.759	T
TBP	seq_16	B	4.5	C-T	4.38415	0.1	0.09	147.1	C2'-endo	4	-0.92	not measured	37.3325	T
TBP	seq_16	B	5.5	T-C	4.22174	0.4	-0.28	153.9	C2'-endo	1	-0.32	not measured	42.495	C
TBP	seq_16	B	6.5	C-T	4.51148	0.1	0.06	152.8	C2'-endo	7	-0.67	not measured	40.0041	T
TBP	seq_17	A	-7.5	T-T	4.36456	0.6	0.3	156.7	C2'-endo	5	-0.35	not measured	40.6535	T
TBP	seq_17	A	-6.5	T-C	4.29116	0.3	0.25	152.8	C2'-endo	1	-0.27	not measured	41.803	T
TBP	seq_17	B	-4.5	T-T	4.39596	0.2	-0.12	150.5	C2'-endo	4	-0.84	not measured	36.3355	T
TBP	seq_17	B	0.5	T-T	4.32815	0.4	-0.25	150.2	C2'-endo	2	-0.76	4.04161	37.6228	T
TBP	seq_17	B	1.5	T-T	4.30626	0.4	-0.26	150.2	C2'-endo	2	-0.75	4.0503	37.4248	T
TBP	seq_17	B	2.5	T-T	4.32396	0.5	-0.23	151.1	C2'-endo	3	-0.56	3.95671	38.6567	T
TBP	seq_17	B	3.5	T-T	4.37003	0.4	-0.21	152.6	C2'-endo	4	-0.5	not measured	39.8276	T
TBP	seq_17	B	4.5	C-T	4.64674	0	0.18	155.4	C2'-endo	9	-0.79	not measured	40.0038	T
TBP	seq_17	A	6.5	C-C	4.73686	0	-0.36	164	C2'-endo	6	-0.41	not measured	41.4659	C
TBP	seq_18	A	-7.5	T-C	4.08262	0.4	0.19	143.2	C1'-exo	5	-0.82	not measured	32.8437	T
TBP	seq_18	B	0.5	T-T	4.08921	0.9	-0.29	141	C1'-exo	7	-0.57	3.67959	35.431	T
TBP	seq_18	B	1.5	T-T	4.15871	0.6	-0.16	140.6	C1'-exo	5	-0.72	3.8393	34.1371	T
TBP	seq_18	B	2.5	T-T	4.19312	0.6	-0.19	139.9	C1'-exo	5	-0.74	3.88239	34.9317	T
TBP	seq_18	B	3.5	C-T	4.54798	0	0.31	143.2	C1'-exo	1	-1.19	not measured	32.4968	T
TBP	seq_18	B	4.5	C-C	4.41707	0	0.25	144.9	C2'-endo	5	-1.35	not measured	31.3452	C
TBP	seq_18	B	5.5	C-C	4.35013	0.1	0.03	144.6	C2'-endo	1	-1.15	not measured	33.0669	C
TBP	seq_18	A	7.5	C-C	4.4731	0	-0.22	149.4	C2'-endo	0	-0.98	not measured	31.3061	C
TBP	seq_19	A	-7.5	C-C	4.71453	0	-0.26	166.4	C2'-endo	7	-0.4	not measured	41.9407	C
TBP	seq_19	B	-5.5	C-T	4.9586	0	0.53	161.7	C2'-endo	11	-0.64	not measured	39.4538	T
TBP	seq_19	B	-4.5	C-C	4.6479	0	0.34	163.9	C2'-endo	7	-0.92	not measured	39.8619	C
TBP	seq_19	B	0.5	T-T	4.20036	0.5	-0.19	149	C2'-endo	5	-0.69	3.86768	34.3926	T
TBP	seq_19	B	1.5	T-T	4.22326	0.4	-0.18	147.9	C2'-endo	3	-0.88	3.98161	34.3004	T
TBP	seq_19	B	4.5	C-T	4.51098	0	0.2	153.4	C2'-endo	3	-0.87	not measured	34.4809	T
TBP	seq_19	B	5.5	C-C	4.51741	0	0.15	161.8	C2'-endo	6	-0.84	not measured	39.375	C
TBP	seq_19	A	7.5	C-T	4.91661	0	-0.36	167	C2'-endo	11	-0.53	not measured	41.5382	C
TBP	seq_2	B	-7.5	T-T	4.33927	0.3	-0.14	146	C2'-endo	6	-0.79	not measured	36.637	T
TBP	seq_2	A	-5.5	C-T	4.33578	0.2	0.01	150.6	C2'-endo	4	-1.04	not measured	35.7534	C
TBP	seq_2	B	0.5	T-T	4.10246	0.8	-0.26	142	C1'-exo	5	-0.68	3.78644	36.8453	T
TBP	seq_2	B	1.5	T-T	4.18768	0.7	-0.24	144.1	C2'-endo	3	-0.69	3.8893	38.8494	T
TBP	seq_2	B	2.5	T-T	4.27081	0.6	-0.15	144.8	C2'-endo	4	-0.72	3.95852	38.4225	T
TBP	seq_2	B	3.5	C-T	4.49866	0.1	0.15	145.6	C2'-endo	7	-0.94	not measured	37.1404	T
TBP	seq_2	A	7.5	C-C	4.46961	0.1	-0.07	154.2	C2'-endo	2	-0.43	not measured	38.0195	C
TBP	seq_20	A	-5.5	C-T	4.63931	0.1	-0.11	164.9	C2'-endo	9	-0.68	not measured	39.3363	C
TBP	seq_20	A	-2.5	T-T	4.29181	0.4	0.24	156.5	C2'-endo	4	-0.93	not measured	37.5689	T
TBP	seq_20	A	-1.5	T-T	4.28739	0.3	0.2	151.4	C2'-endo	1	-1.01	not measured	35.0747	T
TBP	seq_20	B	0.5	T-T	4.22719	0.3	-0.22	149.1	C2'-endo	2	-1.1	not measured	32.4602	T
TBP	seq_20	B	1.5	T-T	4.16466	0.6	-0.33	150.8	C2'-endo	1	-0.77	not measured	36.7005	T
TBP	seq_20	B	2.5	T-T	4.31121	0.5	-0.27	154.5	C2'-endo	3	-0.6	not measured	39.2849	T
TBP	seq_20	B	3.5	C-T	4.61882	0	0.21	157.3	C2'-endo	7	-0.91	not measured	38.1464	T
TBP	seq_20	B	4.5	C-C	4.59057	0	0.18	163.7	C2'-endo	7	-0.8	not measured	39.8679	C
TBP	seq_20	A	6.5	C-C	4.83003	0	-0.28	167.8	C2'-endo	7	-0.25	not measured	41.0071	C
TBP	seq_3	B	-5.5	C-T	4.59013	0.1	0.3	159.2	C2'-endo	6	-0.56	not measured	36.6238	T
TBP	seq_3	A	-3.5	C-T	4.48453	0.2	-0.17	166.3	C2'-endo	5	-0.55	not measured	38.4051	C
TBP	seq_3	B	0.5	T-T	4.27643	0.5	-0.11	151.4	C2'-endo	4	-0.67	4.03465	36.3565	T
TBP	seq_3	B	1.5	T-T	4.24977	0.6	-0.1	150.2	C2'-endo	4	-0.64	4.01316	36.9279	T
TBP	seq_3	B	2.5	T-T	4.22933	0.7	-0.14	150.5	C2'-endo	4	-0.55	3.92657	38.4789	T
TBP	seq_3	B	3.5	T-T	4.27654	0.7	-0.16	152.3	C2'-endo	4	-0.46	not measured	39.1793	T
TBP	seq_3	B	4.5	C-T	4.44987	0.3	0.07	156.2	C2'-endo	6	-0.59	not measured	39.733	T
TBP	seq_3	B	7.5	C-C	4.42972	0.1	0.04	167	C2'-endo	2	-0.11	not measured	38.9753	C
TBP	seq_4	A	-6.5	T-C	4.15226	0.4	0.12	142.3	C1'-exo	4	-0.67	not measured	32.207	T
TBP	seq_4	B	-4.5	C-T	4.50102	0.1	0.2	139.6	C1'-exo	4	-0.96	not measured	33.9146	T
TBP	seq_4	B	0.5	T-T	4.17823	0.7	-0.18	135.6	C1'-exo	5	-0.72	3.90983	33.8548	T
TBP	seq_4	B	1.5	T-T	4.23342	0.6	-0.17	137.4	C1'-exo	3	-0.7	3.98555	35.2277	T
TBP	seq_4	B	2.5	T-T	4.23923	0.8	-0.27	135	C1'-exo	3	-0.62	3.96658	36.568	T
TBP	seq_4	B	3.5	C-T	4.49957	0.2	0.09	139.9	C1'-exo	3	-0.9	not measured	34.8878	T
TBP	seq_4	B	4.5	C-C	4.32799	0	0.11	134.8	C1'-exo	6	-1.25	not measured	30.0009	C
TBP	seq_4	B	5.5	C-C	4.36636	0.1	0.09	139.5	C1'-exo	5	-1.12	not measured	28.7105	C
TBP	seq_4	B	6.5	C-C	4.13291	0.4	-0.15	107.1	O4'-endo	4	-1.09	not measured	28.3792	C
TBP	seq_4	B	7.5	C-C	4.16849	0.3	-0.17	108.7	C1'-exo	2	-0.97	not measured	30.5797	C
TBP	seq_5	A	-6.5	C-T	4.49785	0.3	-0.05	172.2	C2'-endo	5	-0.17	not measured	40.4215	C
TBP	seq_5	A	-3.5	C-T	4.48655	0.1	-0.15	168.2	C2'-endo	6	-0.61	not measured	39.3152	C
TBP	seq_5	B	0.5	T-T	4.25985	0.5	-0.05	157.6	C2'-endo	3	-0.62	3.92563	35.7371	T
TBP	seq_5	B	1.5	T-T	4.27172	0.4	-0.07	156.4	C2'-endo	2	-0.79	4.01493	35.1015	T
TBP	seq_5	B	4.5	C-T	4.43092	0.3	0.03	162.6	C2'-endo	4	-0.42	not measured	39.8417	T
TBP	seq_5	B	5.5	C-C	4.41995	0.1	0.03	168.3	C2'-endo	2	-0.34	not measured	40.2003	C
TBP	seq_5	B	6.5	C-C	4.44188	0.1	0.03	169	C2'-endo	3	-0.34	not measured	40.819	C
TBP	seq_6	B	-6.5	C-C	4.58969	0	0.3	144.3	C2'-endo	2	-0.98	not measured	32.425	C
TBP	seq_6	B	-5.5	C-C	4.57302	0	0.42	144.9	C2'-endo	4	-1.35	not measured	30.7065	C
TBP	seq_6	B	-4.5	C-C	4.33046	0	0.1	144.5	C2'-endo	5	-1.4	not measured	33.1123	C
TBP	seq_6	B	0.5	T-T	4.06017	1.2	-0.44	130.5	C1'-exo	8	-0.44	3.68823	34.292	T
TBP	seq_6	B	1.5	T-T	4.31061	0.3	-0.06	135.7	C1'-exo	4	-0.72	4.0683	32.3311	T
TBP	seq_6	B	2.5	C-T	4.66022	0	0.34	139.1	C1'-exo	4	-1.3	4.66388	31.9457	T
TBP	seq_6	B	3.5	C-C	4.53379		0.28	139.4	C1'-exo		-1.68	not measured	29.6591	C
TBP	seq_6	B	4.5	C-C	4.36125	0	0.11	139.5	C1'-exo	7	-1.63	not measured	28.4446	C
TBP	seq_6	B	5.5	C-C	4.23487	0.1	0.15	135.4	C1'-exo	7	-1.34	not measured	25.1637	C
TBP	seq_6	B	6.5	C-C	4.20238	0.1	0.09	128.6	C1'-exo	5	-1.21	not measured	27.1187	C
TBP	seq_7	A	-4.5	C-C	4.29135	0.1	-0.14	149.1	C2'-endo	2	-0.74	not measured	34.9061	C
TBP	seq_7	A	-3.5	C-T	4.30647	0.4	-0.08	149.5	C2'-endo	5	-0.69	not measured	36.0204	C
TBP	seq_7	B	0.5	T-T	4.03506	1	-0.3	139.6	C1'-exo	7	-0.55	3.69029	34.3804	T
TBP	seq_7	B	1.5	T-T	4.10765	0.8	-0.13	139.3	C1'-exo	5	-0.62	3.81302	33.4604	T
TBP	seq_7	B	2.5	T-T	4.20136	0.7	-0.09	140	C1'-exo	4	-0.58	3.89452	35.4394	T
TBP	seq_7	B	3.5	T-T	4.27689	0.7	-0.14	141.1	C1'-exo	4	-0.65	not measured	37.6161	T
TBP	seq_7	A	5.5	C-C	4.61185	0.1	-0.01	134.4	C1'-exo	6	-0.65	not measured	37.583	C
TBP	seq_7	A	6.5	C-C	4.8903	0	-0.34	150.6	C2'-endo	9	0.04	not measured	38.2128	C
TBP	seq_8	B	-7.5	T-T	4.41134	0.3	0.03	145.8	C2'-endo	5	-0.49	not measured	36.1614	T
TBP	seq_8	B	-6.5	C-T	4.47689	0	0.28	145.7	C2'-endo	5	-0.93	not measured	34.8268	T
TBP	seq_8	A	-4.5	T-C	4.17862	0.3	0.17	147.7	C2'-endo	0	-0.7	not measured	37.8099	T
TBP	seq_8	A	-3.5	C-T	4.32915	0.2	-0.03	151	C2'-endo	4	-0.86	not measured	35.8368	C
TBP	seq_8	B	0.5	T-T	4.09868	0.7	-0.34	143.3	C1'-exo	3	-0.78	3.85855	35.7137	T
TBP	seq_8	B	1.5	T-T	4.10931	0.7	-0.26	143	C1'-exo	4	-0.73	3.83167	35.7356	T
TBP	seq_8	B	2.5	T-T	4.19195	0.6	-0.17	143.7	C1'-exo	4	-0.67	3.85658	36.0486	T
TBP	seq_8	B	3.5	C-T	4.43611	0.1	0.2	146.2	C2'-endo	5	-0.98	not measured	36.1361	T
TBP	seq_8	A	5.5	C-C	4.60269	0	-0.35	152.4	C2'-endo	6	-0.74	not measured	36.9796	C
TBP	seq_8	B	7.5	C-T	4.49482	0.1	0.14	146.2	C2'-endo	5	-0.73	not measured	36.0808	T
TBP	seq_9	A	-3.5	C-T	4.54188	0.1	-0.14	164.2	C2'-endo	7	-0.81	not measured	38.9598	C
TBP	seq_9	B	0.5	T-T	4.25273	0.4	-0.2	152.8	C2'-endo	2	-0.71	3.91877	36.8118	T
TBP	seq_9	B	1.5	T-T	4.28894	0.4	-0.29	152	C2'-endo	2	-0.7	3.96461	37.5298	T
TBP	seq_9	B	2.5	C-T	4.62294	0	0.26	153.7	C2'-endo	5	-1.08	4.48459	34.8459	T
TBP	seq_9	B	3.5	C-C	4.67586	0	0.46	161.2	C2'-endo	7	-1.25	not measured	34.7649	C
TBP	seq_9	B	4.5	C-C	4.5362	0	0.19	159.4	C2'-endo	7	-1.24	not measured	36.4688	C
TBP	seq_9	A	6.5	C-C	4.67599	0	-0.3	164.7	C2'-endo	4	-0.64	not measured	36.5974	C
