# Supplementary material for: High-throughput characterization of transcription factors that modulate UVdamage formation and repair at single-nucleotide resolution
Source: Research Square preprint supplement (doi:10.21203/rs.3.rs-8197218/v1), 2025-12-10
Supplement: Supplementary file 2 [file 4a2570e4cb5cac98fe61e779.xlsx]

## Sheet: TOC
Supplementary information on the TF proteins and TF motif clusters (curated from Vierstra et al., 2020) studied in the paper, "High-throughput characterization of transcription factors that modulate UV damage formation and repair at single-nucleotide resolution", Wasserman et al.
Table of Contents
#	Dataset	Description
1	Motif_cluster_to_TF_mapping	Mapping from the TF motif clusters generated by Vierstra et al., 2020, to the TF proteins they represent
2	Motif_cluster_damage_formation	Summary of effects on damage formation by TF motif cluster
3	TF_damage_formation	Summary of effects on damage formation by TF protein
4	Motif_cluster_repair	Summary of effects on CPD repair by TF motif cluster
5	TF_repair	Summary of effects on CPD repair by TF protein
*Note: TF motif clusters that did not have a position with at least 30 aggregate damages in their binding site window immediately after UV irradiation were excluded as our limit of detection
Column Name		Content
motif_cluster		TF motif cluster from Vierstra et al., 2020
TF		TF protein
effect_on_[X]_formation		Effect observed on X damage formation in TF binding site
effect_on_CPD_repair		Effect observed on CPD repair in TF binding site

## Sheet: 1_Motif_cluster_to_TF_mapping
motif_cluster	TF
AHR	AHR
AHR	AHR+ARNT
AIRE	AIRE
HD/2	ALX1
HD/8	ALX1
HD/2	ALX3
HD/8	ALX3
HD/2	ALX4
HD/8	ALX4
FOX/4	AR
NR/20	AR
HD/18	ARID3A
HD/2	ARID3B
ARI5A	ARID5A
ARI5B	ARID5B
Ebox/CACGTG/1	ARNT
HIF	ARNT
HIF	ARNT+HIF1A
Ebox/CACGTG/1	ARNTL
HD/2	ARX
HD/8	ARX
Ebox/CAGCTG	ASCL1
Ebox/CAGCTG	ASCL2
CREB/ATF/1	ATF1
CREB/ATF/1	ATF2
CREB/ATF/1	ATF3
AP1/1	ATF3
CREB/ATF/3	ATF4
CREB3/XBP1	ATF6
CREB/ATF/2	ATF7
Ebox/CATATG	ATOH1
Ebox/CAGATGG	ATOH1
AP1/2	BACH1
AP1/2	BACH1+MAFK
AP1/2	BACH2
HD/6	BARHL1
HD/6	BARHL2
HD/2	BARX1
HD/4	BARX1
HD/5	BARX1
BATF	BATF
AP1/1	BATF+JUN
CREB/ATF/2	BATF3
BATF	BATF3
IRF/2	BCL11A
BCL6/2	BCL6
BCL6/1	BCL6B
Ebox/CATATG	BHLHA15
Ebox/CAGCTG	BHLHA15
Ebox/CACGTG/1	BHLHB2
Ebox/CACGTG/1	BHLHB3
Ebox/CATATG	BHLHE22
Ebox/CATATG	BHLHE23
Ebox/CACGTG/1	BHLHE40
Ebox/CACGTG/1	BHLHE41
HD/2	BSX
HD/8	CART1
RUNX/1	CBFB
HD/13	CDX1
HD/18	CDX1
HD/18	CDX2
CCAAT/CEBP	CEBPA
CCAAT/CEBP	CEBPB
CCAAT/CEBP	CEBPD
CCAAT/CEBP	CEBPE
CREB/ATF/3	CEBPG
CCAAT/CEBP	CEBPG
CENBP	CENPB
Ebox/CACGTG/1	CLOCK
Ebox/CACGTG/2	CLOCK
CPEB1	CPEB1
CREB/ATF/1	CREB1
CREB/ATF/2	CREB3
CREB3/XBP1	CREB3
Ebox/CACGTG/1	CREB3L1
CREB3/XBP1	CREB3L1
Ebox/CACGTG/1	CREB3L2
CREB3/XBP1	CREB3L2
CREB/ATF/2	CREB5
CREB/ATF/1	CREM
HD/20	CRX
CTCF	CTCF
CTCF	CTCFL
CUX/1	CUX1
CUX/3	CUX1
CUX/2	CUX1
CUX/1	CUX2
CUX/2	CUX2
CUX/4	CUX2
CCAAT/CEBP	DBP
CREB/ATF/3	DDIT3
DDIT3+CEBPA	DDIT3+CEBPA
HD/2	DLX1
HD/2	DLX2
HD/2	DLX3
HD/2	DLX4
HD/2	DLX5
HD/2	DLX6
HD/20	DMBX1
DMRT1	DMRT1
DMRT3	DMRT3
DMRT1	DMRTB1
HD/20	DPRX
HD/8	DRGX
NFY	DUX
HD/8	DUX4
HD/8	DUXA
E2F/2	E2F1
E2F/1	E2F1
E2F/4	E2F2
E2F/1	E2F2
E2F/2	E2F3
E2F/1	E2F3
E2F/2	E2F4
E2F/1	E2F4
E2F/4	E2F5
E2F/2	E2F6
E2F/2	E2F7
E2F/3	E2F7
E2F/3	E2F8
EBF1	EBF1
EGR	EGR1
EGR	EGR2
EGR	EGR3
EGR	EGR4
ETS/2	EHF
ETS/1	EHF
ETS/1	ELF1
ETS/2	ELF2
ETS/1	ELF2
ETS/2	ELF3
ETS/1	ELF3
ETS/1	ELF4
ETS/2	ELF5
ETS/1	ELF5
ETS/1	ELK1
ETS/1	ELK3
ETS/2	ELK4
ETS/1	ELK4
HD/2	EMX1
HD/7	EMX1
HD/2	EMX2
HD/7	EMX2
HD/2	EN1
HD/7	EN1
HD/2	EN2
TBX/3	EOMES
TBX/4	EOMES
HIF	EPAS1
ETS/1	ERF
ETS/2	ERG
ETS/1	ERG
NR/17	ESR1
NR/17	ESR2
NR/7	ESRRA
NR/12	ESRRA
NR/7	ESRRB
NR/11	ESRRB
NR/7	ESRRG
NR/12	ESRRG
HD/2	ESX1
ETS/2	ETS1
ETS/1	ETS1
ETS/2	ETS2
ETS/1	ETV1
ETS/2	ETV2
ETS/1	ETV2
ETS/1	ETV3
ETS/2	ETV4
ETS/1	ETV4
ETS/2	ETV5
ETS/1	ETV5
ETS/2	ETV6
ETS/1	ETV6
HD/2	EVX1
HD/2	EVX2
EWSR1/FLI1	EWSR1-FLI1
ETS/2	FEV
ETS/1	FEV
FEZF1	FEZF1
Ebox/CACCTG	FIGLA
ETS/2	FLI1
ETS/1	FLI1
AP1/1	FOS
CREB/ATF/1	FOS+JUN
AP1/1	FOS+JUN
AP1/1	FOS+JUNB
AP1/1	FOS+JUND
AP1/1	FOSB
CREB/ATF/1	FOSB+JUN
CREB/ATF/1	FOSB+JUNB
AP1/1	FOSB+JUNB
AP1/1	FOSL1
CREB/ATF/1	FOSL1+JUN
AP1/1	FOSL1+JUN
AP1/1	FOSL1+JUNB
CREB/ATF/1	FOSL1+JUND
AP1/1	FOSL1+JUND
AP1/1	FOSL2
CREB/ATF/1	FOSL2+JUN
AP1/1	FOSL2+JUN
CREB/ATF/1	FOSL2+JUNB
AP1/1	FOSL2+JUNB
CREB/ATF/1	FOSL2+JUND
AP1/1	FOSL2+JUND
FOX/4	FOXA1
FOX/4	FOXA2
FOX/4	FOXA3
FOX/4	FOXB1
FOX/6	FOXB1
FOX/9	FOXB1
FOX/4	FOXC1
FOX/5	FOXC1
FOX/6	FOXC1
FOX/4	FOXC2
FOX/5	FOXC2
FOX/6	FOXC2
FOX/5	FOXD1
FOX/5	FOXD2
FOX/6	FOXD2
FOX/4	FOXD3
FOX/5	FOXD3
FOX/6	FOXD3
FOX/5	FOXF2
FOX/5	FOXG1
FOX/8	FOXG1
FOX/1	FOXH1
NFY	FOXI1
FOX/3	FOXI1
FOX/5	FOXI1
FOX/3	FOXJ2
FOX/5	FOXJ2
FOX/3	FOXJ3
FOX/5	FOXJ3
FOX/8	FOXJ3
FOX/4	FOXK1
FOX/5	FOXK1
FOX/8	FOXK1
FOX/4	FOXK2
FOX/5	FOXL1
FOX/5	FOXL2
FOX/4	FOXM1
FOX/2	FOXO1
FOX/4	FOXO1
FOX/5	FOXO1
FOX/7	FOXO1
FOX/2	FOXO3
FOX/5	FOXO3
FOX/7	FOXO3
FOX/2	FOXO4
FOX/5	FOXO4
FOX/7	FOXO4
FOX/2	FOXO6
FOX/5	FOXO6
FOX/7	FOXO6
FOX/4	FOXP1
FOX/4	FOXP2
FOX/5	FOXP2
FOX/5	FOXP3
FOX/5	FOXQ1
ETS/1	GABPA
GATA	GATA1
GATA	GATA1+TAL1
GATA	GATA2
GATA	GATA3
GATA	GATA4
GATA	GATA5
GATA	GATA6
HD/2	GBX1
HD/2	GBX2
HD/7	GBX2
GCM	GCM1
GCM	GCM2
GFI	GFI1
GFI	GFI1B
GLI	GLI1
GLI	GLI2
GLI	GLI3
GLIS	GLIS1
GLIS	GLIS2
GLIS	GLIS3
GMEB2/2	GMEB1
GMEB2/1	GMEB2
GMEB2/2	GMEB2
GMEB2/3	GMEB2
GRHL	GRHL1
GRHL	GRHL2
HD/20	GSC
HD/20	GSC2
HD/2	GSX1
HD/2	GSX2
HAND1	HAND1
HAND1	HAND1+TCF3
Ebox/CACGTG/2	HES1
Ebox/CACGTG/2	HES2
Ebox/CACGTG/1	HES5
Ebox/CACGTG/1	HES7
HD/2	HESX1
Ebox/CACGTG/1	HEY1
Ebox/CACGTG/1	HEY2
HIC/1	HIC1
HIC/2	HIC1
HIC/1	HIC2
HIF	HIF1A
HINFP1/1	HINFP
HINFP1/1	HINFP1
HINFP1/2	HINFP1
HINFP1/3	HINFP1
CCAAT/CEBP	HLF
HLTF	HLTF
HD/25	HMBOX1
HD/4	HMX1
HD/4	HMX2
HD/4	HMX3
HD/10	HNF1A
HD/10	HNF1B
NR/1	HNF4A
NR/1	HNF4G
HOMEZ	HOMEZ
HD/2	HOXA1
HD/15	HOXA1
HD/14	HOXA10
HD/17	HOXA10
HD/18	HOXA10
HD/17	HOXA11
HD/18	HOXA11
HD/17	HOXA13
CPEB1	HOXA13
HD/18	HOXA13
HD/2	HOXA2
HD/2	HOXA5
HD/14	HOXA9
HD/17	HOXB13
HD/18	HOXB13
HD/2	HOXB2
HD/2	HOXB3
HD/2	HOXB4
HD/2	HOXB5
HD/16	HOXB7
HD/16	HOXB8
HD/17	HOXC10
HD/18	HOXC10
HD/17	HOXC11
HD/18	HOXC11
HD/17	HOXC12
HD/18	HOXC12
HD/17	HOXC13
HD/18	HOXC13
HD/14	HOXC9
HD/18	HOXC9
HD/17	HOXD11
HD/18	HOXD11
HD/17	HOXD12
HD/18	HOXD12
HD/17	HOXD13
HD/18	HOXD13
HD/2	HOXD3
HD/2	HOXD8
HD/17	HOXD9
HD/18	HOXD9
HSF	HSF1
HSF	HSF2
HSF	HSF4
HSFY2	HSFY2
Ebox/CACGTG/1	ID2
Ebox/CACCTG	ID4
ZNF143	IKZF1
INSM1	INSM1
IRF/2	IRF1
IRF/1	IRF2
IRF/2	IRF2
IRF/1	IRF3
IRF/2	IRF3
IRF/1	IRF4
IRF/2	IRF4
IRF/3	IRF5
IRF/1	IRF7
IRF/4	IRF7
IRF/1	IRF8
IRF/2	IRF8
IRF/1	IRF9
HD/23	IRX2
HD/23	IRX3
HD/23	IRX5
HD/2	ISL1
HD/4	ISL2
HD/2	ISX
CREB/ATF/2	JDP2
AP1/1	JDP2
CREB/ATF/2	JUN
AP1/1	JUN
CREB/ATF/1	JUN+JUNB
AP1/1	JUN+JUNB
CREB/ATF/1	JUNB
AP1/1	JUNB
CREB/ATF/2	JUND
AP1/1	JUND
HD/2	LBX1
HD/2	LBX2
TCF/LEF	LEF1
LEF1	LEF1
HD/2	LHX2
HD/2	LHX3
HD/9	LHX3
HD/2	LHX4
HD/1	LHX6
HD/2	LHX6
HD/1	LHX8
HD/2	LHX8
HD/2	LHX9
LIN54	LIN54
HD/2	LMX1A
HD/2	LMX1B
Ebox/CAGATGG	LYL1
MAF	MAF
AP1/2	MAF+NFE2
CREB/ATF/2	MAFB
MAF	MAFB
MAF	MAFF
MAF	MAFG
MAF	MAFK
Ebox/CACGTG/1	MAX
Ebox/CACGTG/2	MAX
Ebox/CACGTG/2	MAX+MYC
MBD2	MBD2
EVI1/MECOM	MECOM
MECP2	MECP2
MEF2	MEF2A
MEF2	MEF2B
MEF2	MEF2C
MEF2	MEF2D
HD/14	MEIS1
MIES	MEIS1
MIES	MEIS2
MIES	MEIS3
HD/2	MEOX1
HD/2	MEOX2
HD/11	MEOX2
Ebox/CACCTG	MESP1
TBX/2	MGA
TBX/4	MGA
Ebox/CACGTG/1	MITF
HD/2	MIX-A
HD/2	MIXL1
Ebox/CACGTG/1	MLX
Ebox/CACGTG/1	MLXIP
Ebox/CACGTG/1	MLXIPL
Ebox/CACGTG/1	MNT
HD/2	MNX1
Ebox/CAGCTG	MSC
Ebox/CAGATGG	MSGN1
HD/2	MSX1
HD/5	MSX1
HD/2	MSX2
HD/5	MSX2
HD/2	MSX3
HD/5	MSX3
MTF1	MTF1
Ebox/CACGTG/2	MXI1
MYB/5	MYB
MYB/5	MYBL1
MYB/1	MYBL1
MYB/2	MYBL1
MYB/3	MYBL1
MYB/4	MYBL1
MYB/1	MYBL2
MYB/2	MYBL2
MYB/3	MYBL2
MYB/4	MYBL2
Ebox/CACGTG/2	MYC
Ebox/CACGTG/2	MYCN
Ebox/CAGCTG	MYF6
Ebox/CAGCTG	MYOD1
Ebox/CAGCTG	MYOG
MZF1	MZF1
REL-halfsite	MZF1
MFZ1	MZF1
OCT4+SOX2	NANOG
Ebox/CAGATGG	NEUROD1
Ebox/CATATG	NEUROD2
Ebox/CAGATGG	NEUROD2
Ebox/CATATG	NEUROG1
Ebox/CATATG	NEUROG2
Ebox/CAGATGG	NEUROG2
NFAT/2	NFAT5
NFAT/2	NFATC1
NFAT/1	NFATC1
NFAC/2	NFATC1
NFAT/3	NFATC1
NFAT/4	NFATC1
NFAT/1	NFATC2
NFAT/2	NFATC3
NFAT/1	NFATC3
NFAT/1	NFATC4
AP1/2	NFE2
AP1/1	NFE2
AP1/1	NFE2L1
AP1/2	NFE2L2
NFI/3	NFIA
NFI/2	NFIA
NFI/1	NFIA
NFI/1	NFIB
NFI/3	NFIC
NFI/2	NFIC
NFI/1	NFIC
NFI/1	NFIC+TLX1
CCAAT/CEBP	NFIL3
NFI/1	NFIX
NFKB/1	NFKB1
NFKB/2	NFKB1
NFKB/1	NFKB2
NFKB/2	NFKB2
NFY	NFYA
NFY	NFYB
NFY	NFYC
HEN1	NHLH1
Ebox/CAGCTG	NHLH1
HD/22	NKX2-1
HD/22	NKX2-2
HD/22	NKX2-3
HD/4	NKX2-5
HD/22	NKX2-5
HD/21	NKX2-8
HD/22	NKX2-8
HD/4	NKX3-1
HD/22	NKX3-1
HD/4	NKX3-2
HD/2	NKX6-1
HD/5	NKX6-1
HD/2	NKX6-2
HD/2	NOBOX
HD/2	NOTO
Ebox/CACGTG/1	NPAS2
NR/18	NR1A4+RXRA
NR/19	NR1D1
NR/19	NR1D2
NR/1	NR1H2+RXRA
NR/1	NR1H3
NR/16	NR1H3
NR/16	NR1H3+RXRA
NR/16	NR1H4
NR/18	NR1H4
NR/16	NR1I2
NR/16	NR1I3
NR/12	NR2C1
NR/1	NR2C2
NR/3	NR2C2
NR/14	NR2E1
NR/2	NR2E3
NR2E3	NR2E3
NR/1	NR2F1
NR/3	NR2F1
NR/12	NR2F1
NR/13	NR2F1
NR/12	NR2F2
NR/1	NR2F6
NR/13	NR2F6
NR/20	NR3C1
NR/20	NR3C2
NR/3	NR4A1
NR/12	NR4A1
NR/6	NR4A2
NR/9	NR4A2
NR/12	NR4A2
NR/18	NR4A2+RXRA
NR/11	NR5A1
NR/11	NR5A2
NR/11	NR6A1
NRF1	NRF1
MAF	NRL
Ebox/CATATG	OLIG1
Ebox/CATATG	OLIG2
Ebox/CAGATGG	OLIG2
Ebox/CATATG	OLIG3
CUX/1	ONECUT1
CUX/1	ONECUT2
CUX/1	ONECUT3
OSR2	OSR2
HD/19	OTX1
HD/20	OTX1
HD/19	OTX2
HD/20	OTX2
OVOL1	OVOL1
MYB/4	OVOL2
PAX/1	PAX1
PAX/1	PAX2
PAX-halfsite	PAX2
CUX/1	PAX3
HD/2	PAX4
PAX/1	PAX5
PAX/2	PAX5
PAX/1	PAX6
CUX/1	PAX7
PAX/1	PAX9
HD/12	PBX1
HD/16	PBX1
HD/12	PBX2
HD/16	PBX2
HD/12	PBX3
NFY	PBX3
HD/2	PDX1
HD/16	PDX1
NR/20	PGR
HD/8	PHOX2A
HD/8	PHOX2B
HD/20	PITX1
HD/20	PITX3
HD/12	PKNOX1
MIES	PKNOX1
MIES	PKNOX2
PLAG1	PLAG1
POU/2	POU1F1
POU/3	POU1F1
POU/1	POU1F1
POU/3	POU2F1
POU/1	POU2F1
POU/3	POU2F2
POU/1	POU2F2
POU/3	POU2F3
POU/1	POU2F3
POU/2	POU3F1
POU/3	POU3F1
OCT4+SOX2	POU3F1
POU/1	POU3F1
POU/2	POU3F2
POU/3	POU3F2
POU/1	POU3F2
POU/2	POU3F3
POU/3	POU3F3
POU/1	POU3F3
POU/2	POU3F4
POU/1	POU3F4
POU/2	POU4F1
POU/2	POU4F2
POU/2	POU4F3
OCT4+SOX2	POU5F1
POU/1	POU5F1
OCT4+SOX2	POU5F1+SOX2
POU/1	POU5F1B
POU/3	POU5F1P1
POU/1	POU5F1P1
HD/2	POU6F1
HD/2	POU6F2
NR/3	PPARA
NR/3	PPARA+RXRA
NR/3	PPARG
NR/17	PPARG
NR/3	PPARG+RXRA
PRDM1	PRDM1
PRDM14	PRDM14
PRDM16	PRDM16
PRDM4	PRDM4
PRDM5	PRDM5
NFAC/2	PRDM6
PRDM9	PRDM9
HD/8	PROP1
PROX1	PROX1
HD/2	PRRX1
HD/8	PRRX1
HD/2	PRRX2
Ebox/CAGATGG	PTF1A
NR/3	RARA
NR/11	RARA
NR/12	RARA
NR/13	RARA
NR/16	RARA
NR/12	RARA+RXRA
NR/12	RARA+RXRG
NR/12	RARB
NR/13	RARB
NR/16	RARB
NR/12	RARG
NR/13	RARG
NR/16	RARG
NR/17	RARG
HD/2	RAX
HD/2	RAX2
HD/2	RAXL1
RBPJ	RBPJ
NFKB/3	REL
NFKB/1	REL
NFKB/1	RELA
NFKB/1	RELB
REL-halfsite	RELB
REST/NRSF	REST
RFX/1	RFX1
RFX/2	RFX2
RFX/1	RFX2
RFX/2	RFX3
RFX/1	RFX3
RFX/2	RFX4
RFX/1	RFX4
RFX/3	RFX5
RFX/1	RFX5
RFX/3	RFX6
HD/24	RHOX11
HD/20	RHOXF1
NR/3	RORA
NR/12	RORA
NR/13	RORA
NR/19	RORA
NR/19	RORB
NR/19	RORC
RUNX/1	RUNX1
RUNX/2	RUNX2
RUNX/1	RUNX2
RUNX/2	RUNX3
RUNX/1	RUNX3
NR/1	RXRA
NR/3	RXRA
NR/4	RXRA
NR/11	RXRA
NR/15	RXRA+VDR
NR/1	RXRB
NR/16	RXRB
NR/1	RXRG
NR/4	RXRG
NR/11	RXRG
SCRT1	SCRT1
SCRT1	SCRT2
HD/2	SHOX
HD/2	SHOX2
SIX/1	SIX1
SIX/1	SIX2
SIX/2	SIX3
SIX/1	SIX4
SMAD	SMAD2
ZNF335	SMAD2
SMAD	SMAD2+SMAD3+SMAD4
SMAD	SMAD3
SMAD	SMAD4
SMARCA1	SMARCA1
SMARCA5	SMARCA5
Ebox/CACCTG	SNAI1
SNAI2	SNAI2
Ebox/CACCTG	SNAI2
SOX/3	SOX1
SOX/4	SOX1
SOX/5	SOX1
SOX/8	SOX1
SOX/1	SOX10
SOX/3	SOX10
SOX/4	SOX10
SOX/5	SOX10
SOX/6	SOX10
SOX/8	SOX10
SOX/4	SOX11
SOX/1	SOX13
SOX/3	SOX14
SOX/4	SOX14
SOX/5	SOX14
SOX/1	SOX15
SOX/3	SOX15
SOX/4	SOX15
SOX/5	SOX15
SOX/1	SOX17
SOX/3	SOX17
SOX/4	SOX17
SOX/3	SOX18
SOX/4	SOX18
SOX/5	SOX18
OCT4+SOX2	SOX2
SOX/1	SOX2
SOX/3	SOX2
SOX/4	SOX2
SOX/5	SOX2
SOX/3	SOX21
SOX/4	SOX21
SOX/5	SOX21
SOX/6	SOX21
SOX/1	SOX3
SOX/3	SOX3
SOX/4	SOX3
SOX/5	SOX3
SOX/1	SOX4
SOX/4	SOX4
SOX/2	SOX5
SOX/1	SOX6
SOX/3	SOX7
SOX/4	SOX7
SOX/6	SOX7
SOX/3	SOX8
SOX/4	SOX8
SOX/5	SOX8
SOX/6	SOX8
SOX/8	SOX8
SOX/1	SOX9
SOX/3	SOX9
SOX/4	SOX9
SOX/5	SOX9
SOX/6	SOX9
SOX/7	SOX9
SOX/8	SOX9
HD/2	SP7
ETS/1	SPDEF
SPDEF/1	SPDEF
SPDEF/2	SPDEF
SPI	SPI1
SPI	SPIB
SPI	SPIC
SPZ1	SPZ1
Ebox/CACGTG/1	SREBF1
SREBF1	SREBF1
Ebox/CACGTG/1	SREBF2
SREBF1	SREBF2
SRF	SRF
SOX/1	SRY
SOX/3	SRY
SOX/4	SRY
SOX/5	SRY
SOX/6	SRY
IRF/2	STAT1
STAT/2	STAT1
IRF/2	STAT1+STAT2
IRF/2	STAT2
STAT/2	STAT3
STAT/2	STAT4
STAT/2	STAT5A
STAT/2	STAT5A+STAT5B
STAT/2	STAT5B
STAT/1	STAT6
TBX/1	T
GATA	TAL1
Ebox/CAGATGG	TAL1+TCF3
TATA	TBP
TBX/4	TBR1
TBX/4	TBX1
TBX/4	TBX15
TBX/1	TBX19
TBX/2	TBX2
TBX/4	TBX2
TBX/4	TBX20
SMAD	TBX20
TBX/2	TBX21
TBX/3	TBX21
TBX/4	TBX21
TBX/3	TBX3
TBX/2	TBX4
TBX/4	TBX4
TBX/2	TBX5
TBX/4	TBX5
Ebox/CAGCTG	TCF12
Ebox/CACCTG	TCF12
Ebox/CAGCTG	TCF21
Ebox/CAGCTG	TCF3
Ebox/CACCTG	TCF3
Ebox/CACCTG	TCF4
TCF/LEF	TCF7
LEF1	TCF7
TCF/LEF	TCF7L1
TCF/LEF	TCF7L2
TFAP2/2	TCFAP2A
TFAP2/1	TCFAP2A
Ebox/CACGTG/2	TCFL5
TEAD	TEAD1
TEAD	TEAD2
TEAD	TEAD3
TEAD	TEAD4
CCAAT/CEBP	TEF
TFAP2/2	TFAP2A
TFAP2/1	TFAP2A
TFAP2/2	TFAP2B
TFAP2/1	TFAP2B
TFAP2/2	TFAP2C
TFAP2/1	TFAP2C
Ebox/CAGCTG	TFAP4
GRHL	TFCP2
TFCP2	TFCP2
TFCP2	TFCP2L1
E2F/2	TFDP1
Ebox/CACGTG/1	TFE3
Ebox/CACGTG/1	TFEB
Ebox/CACGTG/1	TFEC
MIES	TGIF1
MIES	TGIF2
MIES	TGIF2LX
THAP1	THAP1
ZNF143	THAP11
NR/5	THRA
NR/16	THRA
NR/5	THRB
NR/8	THRB
NR/10	THRB
NR/16	THRB
P53-like/2	TP53
P53-like/3	TP53
P53-like/1	TP53
P53-like/1	TP63
P53-like/1	TP73
Ebox/CAGATGG	TWIST1
Ebox/CAGCTG	TWIST1
Ebox/CATATG	TWIST2
HD/2	UNCX
HD/8	UNCX
Ebox/CACGTG/1	USF1
Ebox/CACGTG/1	USF2
HD/2	VAX1
HD/2	VAX2
NR/15	VDR
HD/2	VENTX
HD/3	VENTX
HD/2	VSX1
HD/2	VSX2
CREB/ATF/2	XBP1
CREB3/XBP1	XBP1
YY1	YY1
YY1	YY2
ZBED1	ZBED1
ZBTB14	ZBTB14
Ebox/CAGCTG	ZBTB18
KAISO	ZBTB33
ZBTB48	ZBTB48
ZBTB49	ZBTB49
ZBTB6	ZBTB6
ETS/1	ZBTB7A
GLI	ZBTB7A
ZBTB7A	ZBTB7A
GLI	ZBTB7B
GLI	ZBTB7C
SNAI2	ZEB1
Ebox/CACCTG	ZEB1
ZNF28	ZFP28
YY1	ZFP42
ZNF57	ZFP57
ZNF652	ZFP652
ZIC/2	ZFP740
ZNF354	ZFP82
ZFX	ZFX
ZIC/2	ZIC1
ZIC	ZIC1
ZIC	ZIC2
ZIC	ZIC3
ZIC	ZIC4
ZIM3	ZIM3
ZKSCAN1	ZKSCAN1
ZFN121	ZNF121
ZNF134	ZNF134
ZNF136	ZNF136
ZNF140	ZNF140
ZNF143	ZNF143
ZNF146	ZNF146
TBX/4	ZNF18
ZNF354	ZNF214
ZNF232	ZNF232
Ebox/CAGCTG	ZNF238
ZNF24	ZNF24
ZNF250	ZNF250
ZNF257	ZNF257
ZNF146	ZNF260
ZNF354	ZNF264
ZNF274	ZNF274
ZNF282	ZNF282
ZNF306	ZNF306
ZNF317	ZNF317
ZNF320	ZNF320
ZNF332	ZNF322
ZNF324	ZNF324
ZNF329	ZNF329
ZNF331	ZNF331
ZNF335	ZNF335
LEF1	ZNF350
ZNF354	ZNF354A
ZNF53	ZNF354C
ZNF382	ZNF382
ZNF384/1	ZNF384
ZNF384/2	ZNF384
ZNF354	ZNF394
ZNF41	ZNF41
ZNF410	ZNF410
ZNF418	ZNF418
ZNF423	ZNF423
ZNF431	ZNF431
ZNF435	ZNF435
ZNF436	ZNF436
ZNF449	ZNF449
ZNF490	ZNF490
SMARCA5	ZNF502
ZNF524	ZNF524
ZNF528	ZNF528
ZNF547	ZNF547
ZNF549	ZNF549
ZNF554	ZNF554
ZNF563	ZNF563
SMARCA5	ZNF582
ZNF586	ZNF586
ZNF667	ZNF667
ZNF680	ZNF680
ZNF708	ZNF708
ZNF713	ZNF713
ZIC/2	ZNF740
RBPJ	ZNF75A
ZNF143	ZNF76
ZNF768	ZNF768
ZNF784	ZNF784
ZNF85	ZNF8
MZF1	ZNF816
ZNF85	ZNF85
ZSCAN3	ZSCAN31
ZSCAN4	ZSCAN4

## Sheet: 2_Motif_cluster_damage_formatio
motif_cluster	effect_on_CPD_formation	effect_on_64PP_formation
AHR	No effect	No effect
AIRE	No effect	No effect
AP1/1	Both	No effect
AP1/2	No effect	No effect
ARI5B	No effect	No effect
BATF	No effect	No effect
BCL6/1	No effect	No effect
BCL6/2	No effect	No effect
CCAAT/CEBP	Depleted	No effect
CENBP	No effect	No effect
CPEB1	No effect	No effect
CREB3/XBP1	No effect	Depleted
CREB/ATF/1	Both	Depleted
CREB/ATF/2	Enriched	Both
CREB/ATF/3	No effect	No effect
CTCF	Both	Both
CUX/1	No effect	No effect
CUX/2	No effect	Enriched
CUX/3	No effect	No effect
DMRT3	No effect	No effect
E2F/1	Enriched	No effect
E2F/2	Both	Both
E2F/3	No effect	No effect
E2F/4	No effect	No effect
EBF1	No effect	No effect
EGR	Enriched	Both
ETS/1	Both	Enriched
ETS/2	Both	Enriched
EVI1/MECOM	No effect	No effect
Ebox/CACCTG	No effect	Depleted
Ebox/CACGTG/1	No effect	No effect
Ebox/CACGTG/2	Enriched	Depleted
Ebox/CAGATGG	No effect	Depleted
Ebox/CAGCTG	Enriched	Depleted
Ebox/CATATG	No effect	No effect
FEZF1	Enriched	No effect
FOX/1	No effect	No effect
FOX/4	No effect	No effect
FOX/5	No effect	No effect
FOX/7	No effect	Enriched
FOX/8	No effect	No effect
GATA	No effect	Enriched
GCM	No effect	No effect
GFI	No effect	Enriched
GLI	Enriched	Enriched
GLIS	No effect	No effect
GMEB2/1	No effect	No effect
GMEB2/2	No effect	No effect
GMEB2/3	No effect	No effect
GRHL	No effect	No effect
HD/10	No effect	No effect
HD/12	No effect	Enriched
HD/14	No effect	No effect
HD/16	No effect	Enriched
HD/18	No effect	No effect
HD/2	No effect	Enriched
HD/20	No effect	No effect
HD/21	No effect	No effect
HD/22	Enriched	Enriched
HD/23	No effect	No effect
HD/25	No effect	No effect
HD/4	No effect	No effect
HD/6	No effect	No effect
HD/8	No effect	No effect
HEN1	No effect	No effect
HIC/1	No effect	No effect
HIC/2	Enriched	No effect
HIF	No effect	No effect
HINFP1/1	Enriched	No effect
HSF	No effect	No effect
HSFY2	No effect	No effect
INSM1	No effect	No effect
IRF/1	No effect	No effect
IRF/2	Depleted	Enriched
IRF/3	No effect	No effect
KAISO	No effect	No effect
KLF/SP/1	Both	Both
LEF1	Depleted	No effect
MAF	No effect	No effect
MBD2	Enriched	No effect
MECP2	No effect	No effect
MEF2	No effect	No effect
MFZ1	No effect	No effect
MIES	No effect	No effect
MTF1	No effect	No effect
MYB/1	No effect	No effect
MYB/2	No effect	No effect
MYB/3	No effect	No effect
MYB/4	No effect	No effect
MYB/5	No effect	No effect
MZF1	No effect	Enriched
NFAC/2	No effect	No effect
NFAT/1	Depleted	No effect
NFAT/2	Depleted	No effect
NFI/1	No effect	Depleted
NFI/2	No effect	No effect
NFI/3	No effect	Depleted
NFKB/1	Enriched	Depleted
NFKB/2	No effect	Enriched
NFKB/3	No effect	Enriched
NFY	Both	Enriched
NRF1	Enriched	Enriched
NR/1	No effect	Both
NR/11	No effect	Depleted
NR/12	No effect	Both
NR/13	No effect	No effect
NR/14	No effect	No effect
NR/15	No effect	No effect
NR/16	Depleted	Both
NR/17	Enriched	Depleted
NR/18	No effect	No effect
NR/19	No effect	Enriched
NR/2	No effect	No effect
NR/20	Enriched	No effect
NR/3	No effect	Both
NR/4	No effect	No effect
NR/5	No effect	No effect
NR/7	No effect	No effect
OSR2	No effect	No effect
OVOL1	No effect	No effect
P53/like/1	No effect	No effect
PAX/1	No effect	No effect
PAX/2	Both	Depleted
PLAG1	No effect	No effect
POU/1	Enriched	No effect
POU/2	No effect	No effect
POU/3	No effect	No effect
PRDM1	No effect	No effect
PRDM14	No effect	No effect
PRDM4	No effect	No effect
PROX1	No effect	No effect
RBPJ	No effect	Enriched
REL/halfsite	No effect	Enriched
REST/NRSF	No effect	No effect
RFX/1	No effect	No effect
RFX/2	No effect	No effect
RFX/3	No effect	Enriched
RUNX/1	No effect	No effect
RUNX/2	No effect	No effect
SCRT1	No effect	No effect
SIX/1	No effect	No effect
SMAD	No effect	No effect
SMARCA1	Enriched	No effect
SMARCA5	No effect	No effect
SNAI2	No effect	No effect
SOX/1	Both	No effect
SOX/2	No effect	No effect
SOX/3	No effect	No effect
SOX/4	No effect	No effect
SOX/5	No effect	No effect
SPDEF/2	No effect	No effect
SPI	Enriched	Enriched
SREBF1	No effect	Enriched
SRF	No effect	No effect
STAT/1	No effect	No effect
STAT/2	Enriched	Enriched
TATA	No effect	Enriched
TBX/1	No effect	No effect
TBX/2	No effect	Enriched
TBX/3	No effect	Enriched
TBX/4	No effect	No effect
TCF/LEF	No effect	Enriched
TEAD	Depleted	No effect
TFAP2/1	Enriched	Both
TFAP2/2	Enriched	Depleted
TFCP2	No effect	No effect
THAP1	No effect	No effect
YY1	Enriched	Enriched
ZBED1	No effect	No effect
ZBTB14	No effect	Enriched
ZBTB48	No effect	No effect
ZBTB49	No effect	No effect
ZBTB6	No effect	No effect
ZBTB7A	No effect	No effect
ZFN121	No effect	No effect
ZFX	Enriched	Both
ZIC	Enriched	Both
ZIC/2	Enriched	Both
ZIM3	No effect	No effect
ZKSCAN1	No effect	No effect
ZNF134	No effect	No effect
ZNF136	No effect	No effect
ZNF140	No effect	No effect
ZNF143	Depleted	Both
ZNF146	No effect	No effect
ZNF232	No effect	No effect
ZNF24	No effect	No effect
ZNF250	No effect	No effect
ZNF257	No effect	No effect
ZNF274	No effect	No effect
ZNF28	No effect	No effect
ZNF282	No effect	No effect
ZNF317	No effect	No effect
ZNF320	No effect	Depleted
ZNF324	Enriched	Enriched
ZNF329	Enriched	No effect
ZNF331	No effect	Depleted
ZNF332	No effect	No effect
ZNF335	Enriched	No effect
ZNF354	No effect	No effect
ZNF382	No effect	Enriched
ZNF384/1	No effect	No effect
ZNF384/2	Depleted	No effect
ZNF41	No effect	No effect
ZNF410	No effect	No effect
ZNF418	No effect	No effect
ZNF436	No effect	No effect
ZNF449	No effect	Depleted
ZNF490	No effect	No effect
ZNF524	No effect	No effect
ZNF528	No effect	Both
ZNF53	Depleted	No effect
ZNF547	No effect	No effect
ZNF549	No effect	No effect
ZNF554	No effect	No effect
ZNF563	No effect	No effect
ZNF586	No effect	No effect
ZNF667	No effect	No effect
ZNF680	No effect	No effect
ZNF708	No effect	No effect
ZNF713	No effect	No effect
ZNF768	No effect	No effect
ZNF784	No effect	No effect
ZSCAN3	Enriched	No effect
ZSCAN4	No effect	No effect

## Sheet: 3_TF_damage_formation
TF	effect_on_CPD_formation	effect_on_64PP_formation
AHR	No effect	No effect
AIRE	No effect	No effect
ALX1	No effect	No effect
ALX3	No effect	Enriched
ALX4	No effect	No effect
AR	Enriched	No effect
ARID5B	No effect	No effect
ARX	No effect	No effect
ASCL1	Enriched	Depleted
ATF1	Both	Depleted
ATF2	Both	Depleted
ATF3	Both	Depleted
ATF4	No effect	No effect
ATF6	No effect	Depleted
ATF7	Enriched	Both
ATOH1	No effect	Depleted
BACH1	No effect	No effect
BACH2	No effect	No effect
BARHL2	No effect	No effect
BARX1	No effect	Enriched
BATF	No effect	No effect
BATF3	Enriched	Both
BCL11A	Depleted	Enriched
BCL6	No effect	No effect
BCL6B	No effect	No effect
BHLHA15	Enriched	Depleted
BHLHE22	No effect	No effect
BHLHE23	No effect	No effect
BHLHE40	No effect	No effect
BHLHE41	No effect	No effect
BSX	No effect	Enriched
CBFB	No effect	No effect
CDX1	No effect	No effect
CDX2	No effect	No effect
CEBPA	Depleted	No effect
CEBPB	Depleted	No effect
CEBPD	Depleted	No effect
CEBPE	Depleted	No effect
CEBPG	Depleted	No effect
CENPB	No effect	No effect
CLOCK	Enriched	Depleted
CPEB1	No effect	No effect
CREB1	Both	Depleted
CREB3	Enriched	Both
CREB3L1	No effect	Depleted
CREM	Both	Depleted
CRX	No effect	No effect
CTCF	Both	Both
CTCFL	Both	Both
CUX1	No effect	Enriched
CUX2	No effect	Enriched
DBP	Depleted	No effect
DLX1	No effect	Enriched
DLX2	No effect	Enriched
DLX3	No effect	Enriched
DLX4	No effect	Enriched
DLX5	No effect	Enriched
DLX6	No effect	Enriched
DMBX1	No effect	No effect
DMRT3	No effect	No effect
DPRX	No effect	No effect
DRGX	No effect	No effect
DUX4	No effect	No effect
DUXA	No effect	No effect
E2F1	Enriched	Both
E2F1	Both	Both
E2F2	Enriched	No effect
E2F3	Enriched	Both
E2F3	Both	Both
E2F4	Enriched	Both
E2F4	Both	Both
E2F5	No effect	No effect
E2F6	Both	Both
E2F7	Both	Both
E2F8	No effect	No effect
EBF1	No effect	No effect
EGR1	Enriched	Both
EGR2	Enriched	Both
EGR3	Enriched	Both
EGR4	Enriched	Both
EHF	Both	Enriched
ELF1	Both	Enriched
ELF2	Both	Enriched
ELF3	Both	Enriched
ELF4	Both	Enriched
ELF5	Both	Enriched
ELK1	Both	Enriched
ELK3	Both	Enriched
ELK4	Both	Enriched
EMX1	No effect	Enriched
EMX2	No effect	Enriched
EN1	No effect	Enriched
EN2	No effect	Enriched
EOMES	No effect	Enriched
EPAS1	No effect	No effect
ERF	Both	Enriched
ERG	Both	Enriched
ESR1	Enriched	Depleted
ESR2	Enriched	Depleted
ESRRA	No effect	Both
ESRRB	No effect	No effect
ESRRG	No effect	Both
ESX1	No effect	Enriched
ETS1	Both	Enriched
ETS2	Both	Enriched
ETV1	Both	Enriched
ETV2	Both	Enriched
ETV3	Both	Enriched
ETV4	Both	Enriched
ETV5	Both	Enriched
ETV6	Both	Enriched
EVX1	No effect	Enriched
EVX2	No effect	Enriched
FEV	Both	Enriched
FEZF1	Enriched	No effect
FIGLA	No effect	Depleted
FLI1	Both	Enriched
FOS	Both	No effect
FOSB	Both	No effect
FOSL1	Both	No effect
FOSL2	Both	No effect
FOXA1	No effect	No effect
FOXA2	No effect	No effect
FOXA3	No effect	No effect
FOXB1	No effect	No effect
FOXC1	No effect	No effect
FOXC2	No effect	No effect
FOXD1	No effect	No effect
FOXD2	No effect	No effect
FOXD3	No effect	No effect
FOXF2	No effect	No effect
FOXG1	No effect	No effect
FOXH1	No effect	No effect
FOXI1	Both	Enriched
FOXJ2	No effect	No effect
FOXJ3	No effect	No effect
FOXK1	No effect	No effect
FOXK2	No effect	No effect
FOXL1	No effect	No effect
FOXM1	No effect	No effect
FOXO1	No effect	Enriched
FOXO3	No effect	Enriched
FOXO4	No effect	Enriched
FOXO6	No effect	Enriched
FOXP1	No effect	No effect
FOXP2	No effect	No effect
FOXP3	No effect	No effect
FOXQ1	No effect	No effect
GABPA	Both	Enriched
GATA1	No effect	Enriched
GATA2	No effect	Enriched
GATA3	No effect	Enriched
GATA4	No effect	Enriched
GATA5	No effect	Enriched
GATA6	No effect	Enriched
GBX1	No effect	Enriched
GBX2	No effect	Enriched
GCM1	No effect	No effect
GCM2	No effect	No effect
GFI1	No effect	Enriched
GFI1B	No effect	Enriched
GLI2	Enriched	Enriched
GLI3	Enriched	Enriched
GLIS1	No effect	No effect
GLIS2	No effect	No effect
GLIS3	No effect	No effect
GMEB2	No effect	No effect
GRHL1	No effect	No effect
GRHL2	No effect	No effect
GSC	No effect	No effect
GSC2	No effect	No effect
GSX1	No effect	Enriched
GSX2	No effect	Enriched
HES5	No effect	No effect
HES7	No effect	No effect
HESX1	No effect	Enriched
HEY1	No effect	No effect
HEY2	No effect	No effect
HIC1	Enriched	No effect
HIC2	No effect	No effect
HIF1A	No effect	No effect
HINFP	Enriched	No effect
HLF	Depleted	No effect
HMBOX1	No effect	No effect
HMX1	No effect	No effect
HMX2	No effect	No effect
HMX3	No effect	No effect
HNF1A	No effect	No effect
HNF1B	No effect	No effect
HNF4A	No effect	Both
HNF4G	No effect	Both
HOXA1	No effect	Enriched
HOXA10	No effect	No effect
HOXA13	No effect	No effect
HOXA2	No effect	Enriched
HOXA5	No effect	Enriched
HOXA9	No effect	No effect
HOXB13	No effect	No effect
HOXB2	No effect	Enriched
HOXB3	No effect	Enriched
HOXB4	No effect	Enriched
HOXB5	No effect	Enriched
HOXB7	No effect	Enriched
HOXB8	No effect	Enriched
HOXC10	No effect	No effect
HOXC11	No effect	No effect
HOXC12	No effect	No effect
HOXC13	No effect	No effect
HOXC9	No effect	No effect
HOXD11	No effect	No effect
HOXD12	No effect	No effect
HOXD13	No effect	No effect
HOXD8	No effect	Enriched
HSF1	No effect	No effect
HSF2	No effect	No effect
HSF4	No effect	No effect
HSFY2	No effect	No effect
ID4	No effect	Depleted
IKZF1	Depleted	Both
INSM1	No effect	No effect
IRF1	Depleted	Enriched
IRF2	Depleted	Enriched
IRF3	Depleted	Enriched
IRF4	Depleted	Enriched
IRF5	No effect	No effect
IRF7	No effect	No effect
IRF8	Depleted	Enriched
IRF9	No effect	No effect
IRX2	No effect	No effect
IRX5	No effect	No effect
ISL1	No effect	Enriched
ISL2	No effect	No effect
ISX	No effect	Enriched
JDP2	Both	Both
JDP2	Enriched	Both
JUN	Both	Both
JUN	Enriched	Both
JUNB	Both	Depleted
JUND	Both	Both
JUND	Enriched	Both
KLF13	Both	Both
KLF14	Both	Both
KLF16	Both	Both
KLF4	Both	Both
KLF9	Both	Both
LBX1	No effect	Enriched
LBX2	No effect	Enriched
LEF1	Depleted	Enriched
LHX2	No effect	Enriched
LHX3	No effect	Enriched
LHX6	No effect	Enriched
LHX9	No effect	Enriched
LMX1A	No effect	Enriched
LMX1B	No effect	Enriched
LYL1	No effect	Depleted
MAF	No effect	No effect
MAFB	No effect	No effect
MAFF	No effect	No effect
MAFG	No effect	No effect
MAFK	No effect	No effect
MAX	Enriched	Depleted
MBD2	Enriched	No effect
MECOM	No effect	No effect
MECP2	No effect	No effect
MEF2A	No effect	No effect
MEF2B	No effect	No effect
MEF2C	No effect	No effect
MEF2D	No effect	No effect
MEIS1	No effect	No effect
MEIS2	No effect	No effect
MEIS3	No effect	No effect
MEOX1	No effect	Enriched
MEOX2	No effect	Enriched
MESP1	No effect	Depleted
MGA	No effect	Enriched
MITF	No effect	No effect
MIXL1	No effect	Enriched
MLX	No effect	No effect
MLXIPL	No effect	No effect
MNT	No effect	No effect
MNX1	No effect	Enriched
MSC	Enriched	Depleted
MSX1	No effect	Enriched
MSX2	No effect	Enriched
MTF1	No effect	No effect
MXI1	Enriched	Depleted
MYB	No effect	No effect
MYBL2	No effect	No effect
MYC	Enriched	Depleted
MYCN	Enriched	Depleted
MYF6	Enriched	Depleted
MYOD1	Enriched	Depleted
MYOG	Enriched	Depleted
MZF1	No effect	Enriched
NEUROD1	No effect	Depleted
NEUROD2	No effect	Depleted
NFAT5	Depleted	No effect
NFATC1	Depleted	No effect
NFATC2	Depleted	No effect
NFATC3	Depleted	No effect
NFATC4	Depleted	No effect
NFE2	Both	No effect
NFE2L1	Both	No effect
NFE2L2	No effect	No effect
NFIA	No effect	Depleted
NFIB	No effect	Depleted
NFIC	No effect	Depleted
NFIL3	Depleted	No effect
NFIX	No effect	Depleted
NFKB1	Enriched	Both
NFKB2	Enriched	Both
NFYA	Both	Enriched
NFYB	Both	Enriched
NFYC	Both	Enriched
NHLH1	Enriched	Depleted
NKX2-1	Enriched	Enriched
NKX2-3	Enriched	Enriched
NKX2-5	Enriched	Enriched
NKX2-8	Enriched	Enriched
NKX3-1	Enriched	Enriched
NKX3-2	No effect	No effect
NKX6-1	No effect	Enriched
NKX6-2	No effect	Enriched
NOBOX	No effect	Enriched
NOTO	No effect	Enriched
NR1D1	No effect	Enriched
NR1H3	Depleted	Both
NR1H4	Depleted	Both
NR1I2	Depleted	Both
NR1I3	Depleted	Both
NR2C1	No effect	Both
NR2C2	No effect	Both
NR2E1	No effect	No effect
NR2E3	No effect	No effect
NR2F1	No effect	Both
NR2F2	No effect	Both
NR2F6	No effect	Both
NR3C1	Enriched	No effect
NR3C2	Enriched	No effect
NR4A1	No effect	Both
NR4A2	No effect	Both
NR5A1	No effect	Depleted
NR5A2	No effect	Depleted
NR6A1	No effect	Depleted
NRF1	Enriched	Enriched
NRL	No effect	No effect
OLIG1	No effect	No effect
OLIG2	No effect	Depleted
OLIG3	No effect	No effect
ONECUT1	No effect	No effect
ONECUT2	No effect	No effect
ONECUT3	No effect	No effect
OSR2	No effect	No effect
OTX1	No effect	No effect
OTX2	No effect	No effect
OVOL1	No effect	No effect
PAX1	No effect	No effect
PAX2	No effect	No effect
PAX3	No effect	No effect
PAX4	No effect	Enriched
PAX5	Both	Depleted
PAX6	No effect	No effect
PAX7	No effect	No effect
PAX9	No effect	No effect
PBX1	No effect	Enriched
PBX2	No effect	Enriched
PBX3	No effect	Enriched
PDX1	No effect	Enriched
PGR	Enriched	No effect
PHOX2A	No effect	No effect
PHOX2B	No effect	No effect
PITX1	No effect	No effect
PITX3	No effect	No effect
PKNOX1	No effect	Enriched
PKNOX2	No effect	No effect
PLAG1	No effect	No effect
POU1F1	Enriched	No effect
POU2F1	Enriched	No effect
POU2F2	Enriched	No effect
POU2F3	Enriched	No effect
POU3F1	Enriched	No effect
POU3F2	Enriched	No effect
POU3F3	Enriched	No effect
POU3F4	Enriched	No effect
POU4F1	No effect	No effect
POU4F2	No effect	No effect
POU4F3	No effect	No effect
POU5F1	Enriched	No effect
POU5F1B	Enriched	No effect
POU6F1	No effect	Enriched
POU6F2	No effect	Enriched
PPARA	No effect	Both
PPARG	Enriched	Both
PRDM1	No effect	No effect
PRDM14	No effect	No effect
PRDM4	No effect	No effect
PRDM6	No effect	No effect
PROP1	No effect	No effect
PROX1	No effect	No effect
PRRX1	No effect	Enriched
PRRX2	No effect	Enriched
PTF1A	No effect	Depleted
RARA	Depleted	Both
RARB	No effect	No effect
RARG	Depleted	Both
RARG	Enriched	Both
RAX	No effect	Enriched
RAX2	No effect	Enriched
RBPJ	No effect	Enriched
REL	Enriched	Both
RELA	Enriched	Depleted
RELB	Enriched	Both
REST	No effect	No effect
RFX1	No effect	No effect
RFX2	No effect	No effect
RFX3	No effect	No effect
RFX4	No effect	No effect
RFX5	No effect	Enriched
RHOXF1	No effect	No effect
RORA	No effect	Both
RORB	No effect	Enriched
RORC	No effect	Enriched
RUNX1	No effect	No effect
RUNX2	No effect	No effect
RUNX3	No effect	No effect
RXRA	No effect	Both
RXRB	Depleted	Both
RXRG	No effect	Both
SCRT1	No effect	No effect
SCRT2	No effect	No effect
SHOX	No effect	Enriched
SHOX2	No effect	Enriched
SIX1	No effect	No effect
SIX2	No effect	No effect
SMAD2	No effect	No effect
SMAD4	No effect	No effect
SMARCA1	Enriched	No effect
SMARCA5	No effect	No effect
SNAI1	No effect	Depleted
SNAI2	No effect	Depleted
SOX10	Both	No effect
SOX13	Both	No effect
SOX14	No effect	No effect
SOX15	Both	No effect
SOX17	Both	No effect
SOX18	No effect	No effect
SOX2	Both	No effect
SOX21	No effect	No effect
SOX3	Both	No effect
SOX4	Both	No effect
SOX5	No effect	No effect
SOX7	No effect	No effect
SOX8	No effect	No effect
SOX9	Both	No effect
SP1	Both	Both
SP3	Both	Both
SP4	Both	Both
SP8	Both	Both
SPDEF	Both	Enriched
SPI1	Enriched	Enriched
SPIB	Enriched	Enriched
SPIC	Enriched	Enriched
SREBF1	No effect	Enriched
SREBF2	No effect	Enriched
SRF	No effect	No effect
SRY	Both	No effect
STAT1	Enriched	Enriched
STAT2	Depleted	Enriched
STAT3	Enriched	Enriched
STAT4	Enriched	Enriched
STAT5A	Enriched	Enriched
STAT5B	Enriched	Enriched
STAT6	No effect	No effect
TAL1	No effect	Enriched
TBP	No effect	Enriched
TBR1	No effect	No effect
TBX1	No effect	No effect
TBX15	No effect	No effect
TBX19	No effect	No effect
TBX2	No effect	Enriched
TBX20	No effect	No effect
TBX21	No effect	Enriched
TBX3	No effect	Enriched
TBX4	No effect	Enriched
TBX5	No effect	Enriched
TCF12	No effect	Depleted
TCF3	Enriched	Depleted
TCF4	No effect	Depleted
TCF7	No effect	Enriched
TCF7L1	No effect	Enriched
TCF7L2	No effect	Enriched
TEAD1	Depleted	No effect
TEAD2	Depleted	No effect
TEAD3	Depleted	No effect
TEAD4	Depleted	No effect
TEF	Depleted	No effect
TFAP2A	Enriched	Both
TFAP2B	Enriched	Both
TFAP2C	Enriched	Both
TFAP4	Enriched	Depleted
TFCP2	No effect	No effect
TFDP1	Both	Both
TFE3	No effect	No effect
TFEB	No effect	No effect
TFEC	No effect	No effect
TGIF1	No effect	No effect
TGIF2	No effect	No effect
TGIF2LX	No effect	No effect
THAP1	No effect	No effect
THAP11	Depleted	Both
THRA	Depleted	Both
THRB	Depleted	Both
TP53	No effect	No effect
TP63	No effect	No effect
TP73	No effect	No effect
TWIST1	Enriched	Depleted
UNCX	No effect	Enriched
USF1	No effect	No effect
USF2	No effect	No effect
VAX1	No effect	Enriched
VAX2	No effect	Enriched
VDR	No effect	No effect
VENTX	No effect	Enriched
VSX1	No effect	Enriched
VSX2	No effect	Enriched
XBP1	Enriched	Both
YY1	Enriched	Enriched
YY2	Enriched	Enriched
ZBED1	No effect	No effect
ZBTB14	No effect	Enriched
ZBTB18	Enriched	Depleted
ZBTB33	No effect	No effect
ZBTB48	No effect	No effect
ZBTB49	No effect	No effect
ZBTB6	No effect	No effect
ZBTB7A	Both	Enriched
ZBTB7A	Enriched	Enriched
ZBTB7B	Enriched	Enriched
ZBTB7C	Enriched	Enriched
ZEB1	No effect	Depleted
ZFP28	No effect	No effect
ZFP42	Enriched	Enriched
ZFP82	No effect	No effect
ZFX	Enriched	Both
ZIC1	Enriched	Both
ZIC3	Enriched	Both
ZIC4	Enriched	Both
ZIM3	No effect	No effect
ZKSCAN1	No effect	No effect
ZNF121	No effect	No effect
ZNF134	No effect	No effect
ZNF136	No effect	No effect
ZNF140	No effect	No effect
ZNF143	Depleted	Both
ZNF146	No effect	No effect
ZNF18	No effect	No effect
ZNF214	No effect	No effect
ZNF232	No effect	No effect
ZNF24	No effect	No effect
ZNF250	No effect	No effect
ZNF257	No effect	No effect
ZNF260	No effect	No effect
ZNF264	No effect	No effect
ZNF274	No effect	No effect
ZNF282	No effect	No effect
ZNF317	No effect	No effect
ZNF320	No effect	Depleted
ZNF322	No effect	No effect
ZNF324	Enriched	Enriched
ZNF329	Enriched	No effect
ZNF331	No effect	Depleted
ZNF335	Enriched	No effect
ZNF350	Depleted	No effect
ZNF354A	No effect	No effect
ZNF354C	Depleted	No effect
ZNF382	No effect	Enriched
ZNF384	Depleted	No effect
ZNF394	No effect	No effect
ZNF41	No effect	No effect
ZNF410	No effect	No effect
ZNF418	No effect	No effect
ZNF436	No effect	No effect
ZNF449	No effect	Depleted
ZNF490	No effect	No effect
ZNF502	No effect	No effect
ZNF524	No effect	No effect
ZNF528	No effect	Both
ZNF547	No effect	No effect
ZNF549	No effect	No effect
ZNF554	No effect	No effect
ZNF563	No effect	No effect
ZNF582	No effect	No effect
ZNF586	No effect	No effect
ZNF667	No effect	No effect
ZNF680	No effect	No effect
ZNF708	No effect	No effect
ZNF713	No effect	No effect
ZNF740	Enriched	Both
ZNF75A	No effect	Enriched
ZNF76	Depleted	Both
ZNF768	No effect	No effect
ZNF784	No effect	No effect
ZNF816	No effect	Enriched
ZSCAN31	Enriched	No effect
ZSCAN4	No effect	No effect

## Sheet: 4_Motif_cluster_repair
motif_cluster	effect_on_CPD_repair
AHR	No effect
AIRE	No effect
AP1/1	Depleted
AP1/2	No effect
ARI5B	No effect
BATF	No effect
BCL6/1	No effect
BCL6/2	No effect
CCAAT/CEBP	No effect
CENBP	No effect
CPEB1	No effect
CREB3/XBP1	No effect
CREB/ATF/1	No effect
CREB/ATF/2	No effect
CREB/ATF/3	No effect
CTCF	Depleted
CUX/1	No effect
CUX/2	No effect
CUX/3	No effect
DMRT3	No effect
E2F/1	No effect
E2F/2	No effect
E2F/3	No effect
E2F/4	No effect
EBF1	No effect
EGR	No effect
ETS/1	Depleted
ETS/2	Depleted
EVI1/MECOM	No effect
Ebox/CACCTG	Depleted
Ebox/CACGTG/1	No effect
Ebox/CACGTG/2	No effect
Ebox/CAGATGG	Depleted
Ebox/CAGCTG	No effect
Ebox/CATATG	No effect
FEZF1	No effect
FOX/1	No effect
FOX/4	No effect
FOX/5	No effect
FOX/7	No effect
FOX/8	No effect
GATA	No effect
GCM	No effect
GFI	No effect
GLI	No effect
GLIS	No effect
GMEB2/1	No effect
GMEB2/2	No effect
GMEB2/3	No effect
GRHL	No effect
HD/10	No effect
HD/12	No effect
HD/14	No effect
HD/16	No effect
HD/18	No effect
HD/2	No effect
HD/20	No effect
HD/21	No effect
HD/22	No effect
HD/23	No effect
HD/25	No effect
HD/4	No effect
HD/6	No effect
HD/8	No effect
HEN1	No effect
HIC/1	No effect
HIC/2	No effect
HIF	No effect
HINFP1/1	No effect
HSF	No effect
HSFY2	No effect
INSM1	No effect
IRF/1	No effect
IRF/2	Depleted
IRF/3	No effect
KAISO	No effect
KLF/SP/1	No effect
LEF1	No effect
MAF	No effect
MBD2	No effect
MECP2	No effect
MEF2	No effect
MFZ1	No effect
MIES	No effect
MTF1	No effect
MYB/1	No effect
MYB/2	No effect
MYB/3	No effect
MYB/4	No effect
MYB/5	No effect
MZF1	No effect
NFAC/2	No effect
NFAT/1	No effect
NFAT/2	No effect
NFI/1	No effect
NFI/2	No effect
NFI/3	No effect
NFKB/1	No effect
NFKB/2	No effect
NFKB/3	No effect
NFY	No effect
NRF1	No effect
NR/1	No effect
NR/11	No effect
NR/12	No effect
NR/13	No effect
NR/14	No effect
NR/15	No effect
NR/16	No effect
NR/17	No effect
NR/18	No effect
NR/19	No effect
NR/2	No effect
NR/20	No effect
NR/3	No effect
NR/4	No effect
NR/5	No effect
NR/7	No effect
OSR2	No effect
OVOL1	No effect
P53/like/1	No effect
PAX/1	No effect
PAX/2	No effect
PLAG1	No effect
POU/1	No effect
POU/2	No effect
POU/3	No effect
PRDM1	No effect
PRDM14	No effect
PRDM4	No effect
PROX1	No effect
RBPJ	No effect
REL/halfsite	No effect
REST/NRSF	No effect
RFX/1	No effect
RFX/2	No effect
RFX/3	No effect
RUNX/1	No effect
RUNX/2	No effect
SCRT1	No effect
SIX/1	No effect
SMAD	No effect
SMARCA1	No effect
SMARCA5	No effect
SNAI2	No effect
SOX/1	Depleted
SOX/2	No effect
SOX/3	No effect
SOX/4	No effect
SOX/5	No effect
SPDEF/2	No effect
SPI	No effect
SREBF1	No effect
SRF	No effect
STAT/1	No effect
STAT/2	No effect
TATA	No effect
TBX/1	No effect
TBX/2	No effect
TBX/3	Depleted
TBX/4	No effect
TCF/LEF	No effect
TEAD	No effect
TFAP2/1	No effect
TFAP2/2	No effect
TFCP2	No effect
THAP1	No effect
YY1	No effect
ZBED1	No effect
ZBTB14	No effect
ZBTB48	No effect
ZBTB49	No effect
ZBTB6	No effect
ZBTB7A	No effect
ZFN121	No effect
ZFX	No effect
ZIC	No effect
ZIC/2	No effect
ZIM3	No effect
ZKSCAN1	No effect
ZNF134	No effect
ZNF136	No effect
ZNF140	No effect
ZNF143	No effect
ZNF146	No effect
ZNF232	No effect
ZNF24	Depleted
ZNF250	No effect
ZNF257	No effect
ZNF274	No effect
ZNF28	No effect
ZNF282	No effect
ZNF317	No effect
ZNF320	No effect
ZNF324	No effect
ZNF329	No effect
ZNF331	Depleted
ZNF332	No effect
ZNF335	No effect
ZNF354	No effect
ZNF382	No effect
ZNF384/1	No effect
ZNF384/2	No effect
ZNF41	No effect
ZNF410	No effect
ZNF418	No effect
ZNF436	No effect
ZNF449	No effect
ZNF490	No effect
ZNF524	No effect
ZNF528	No effect
ZNF53	No effect
ZNF547	No effect
ZNF549	No effect
ZNF554	No effect
ZNF563	Depleted
ZNF586	No effect
ZNF667	No effect
ZNF680	No effect
ZNF708	No effect
ZNF713	No effect
ZNF768	No effect
ZNF784	No effect
ZSCAN3	No effect
ZSCAN4	No effect

## Sheet: 5_TF_repair
TF	effect_on_CPD_repair
AHR	No effect
AIRE	No effect
ALX1	No effect
ALX3	No effect
ALX4	No effect
AR	No effect
ARID5B	No effect
ARX	No effect
ASCL1	No effect
ATF1	No effect
ATF2	No effect
ATF3	Depleted
ATF4	No effect
ATF6	No effect
ATF7	No effect
ATOH1	Depleted
BACH1	No effect
BACH2	No effect
BARHL2	No effect
BARX1	No effect
BATF	No effect
BATF3	No effect
BCL11A	Depleted
BCL6	No effect
BCL6B	No effect
BHLHA15	No effect
BHLHE22	No effect
BHLHE23	No effect
BHLHE40	No effect
BHLHE41	No effect
BSX	No effect
CBFB	No effect
CDX1	No effect
CDX2	No effect
CEBPA	No effect
CEBPB	No effect
CEBPD	No effect
CEBPE	No effect
CEBPG	No effect
CENPB	No effect
CLOCK	No effect
CPEB1	No effect
CREB1	No effect
CREB3	No effect
CREB3L1	No effect
CREM	No effect
CRX	No effect
CTCF	Depleted
CTCFL	Depleted
CUX1	No effect
CUX2	No effect
DBP	No effect
DLX1	No effect
DLX2	No effect
DLX3	No effect
DLX4	No effect
DLX5	No effect
DLX6	No effect
DMBX1	No effect
DMRT3	No effect
DPRX	No effect
DRGX	No effect
DUX4	No effect
DUXA	No effect
E2F1	No effect
E2F2	No effect
E2F3	No effect
E2F4	No effect
E2F5	No effect
E2F6	No effect
E2F7	No effect
E2F8	No effect
EBF1	No effect
EGR1	No effect
EGR2	No effect
EGR3	No effect
EGR4	No effect
EHF	Depleted
ELF1	Depleted
ELF2	Depleted
ELF3	Depleted
ELF4	Depleted
ELF5	Depleted
ELK1	Depleted
ELK3	Depleted
ELK4	Depleted
EMX1	No effect
EMX2	No effect
EN1	No effect
EN2	No effect
EOMES	Depleted
EPAS1	No effect
ERF	Depleted
ERG	Depleted
ESR1	No effect
ESR2	No effect
ESRRA	No effect
ESRRB	No effect
ESRRG	No effect
ESX1	No effect
ETS1	Depleted
ETS2	Depleted
ETV1	Depleted
ETV2	Depleted
ETV3	Depleted
ETV4	Depleted
ETV5	Depleted
ETV6	Depleted
EVX1	No effect
EVX2	No effect
FEV	Depleted
FEZF1	No effect
FIGLA	Depleted
FLI1	Depleted
FOS	Depleted
FOSB	Depleted
FOSL1	Depleted
FOSL2	Depleted
FOXA1	No effect
FOXA2	No effect
FOXA3	No effect
FOXB1	No effect
FOXC1	No effect
FOXC2	No effect
FOXD1	No effect
FOXD2	No effect
FOXD3	No effect
FOXF2	No effect
FOXG1	No effect
FOXH1	No effect
FOXI1	No effect
FOXJ2	No effect
FOXJ3	No effect
FOXK1	No effect
FOXK2	No effect
FOXL1	No effect
FOXM1	No effect
FOXO1	No effect
FOXO3	No effect
FOXO4	No effect
FOXO6	No effect
FOXP1	No effect
FOXP2	No effect
FOXP3	No effect
FOXQ1	No effect
GABPA	Depleted
GATA1	No effect
GATA2	No effect
GATA3	No effect
GATA4	No effect
GATA5	No effect
GATA6	No effect
GBX1	No effect
GBX2	No effect
GCM1	No effect
GCM2	No effect
GFI1	No effect
GFI1B	No effect
GLI2	No effect
GLI3	No effect
GLIS1	No effect
GLIS2	No effect
GLIS3	No effect
GMEB2	No effect
GRHL1	No effect
GRHL2	No effect
GSC	No effect
GSC2	No effect
GSX1	No effect
GSX2	No effect
HES5	No effect
HES7	No effect
HESX1	No effect
HEY1	No effect
HEY2	No effect
HIC1	No effect
HIC2	No effect
HIF1A	No effect
HINFP	No effect
HLF	No effect
HMBOX1	No effect
HMX1	No effect
HMX2	No effect
HMX3	No effect
HNF1A	No effect
HNF1B	No effect
HNF4A	No effect
HNF4G	No effect
HOXA1	No effect
HOXA10	No effect
HOXA13	No effect
HOXA2	No effect
HOXA5	No effect
HOXA9	No effect
HOXB13	No effect
HOXB2	No effect
HOXB3	No effect
HOXB4	No effect
HOXB5	No effect
HOXB7	No effect
HOXB8	No effect
HOXC10	No effect
HOXC11	No effect
HOXC12	No effect
HOXC13	No effect
HOXC9	No effect
HOXD11	No effect
HOXD12	No effect
HOXD13	No effect
HOXD8	No effect
HSF1	No effect
HSF2	No effect
HSF4	No effect
HSFY2	No effect
ID4	Depleted
IKZF1	No effect
INSM1	No effect
IRF1	Depleted
IRF2	Depleted
IRF3	Depleted
IRF4	Depleted
IRF5	No effect
IRF7	No effect
IRF8	Depleted
IRF9	No effect
IRX2	No effect
IRX5	No effect
ISL1	No effect
ISL2	No effect
ISX	No effect
JDP2	Depleted
JUN	Depleted
JUNB	Depleted
JUND	Depleted
KLF13	No effect
KLF14	No effect
KLF16	No effect
KLF4	No effect
KLF9	No effect
LBX1	No effect
LBX2	No effect
LEF1	No effect
LHX2	No effect
LHX3	No effect
LHX6	No effect
LHX9	No effect
LMX1A	No effect
LMX1B	No effect
LYL1	Depleted
MAF	No effect
MAFB	No effect
MAFF	No effect
MAFG	No effect
MAFK	No effect
MAX	No effect
MBD2	No effect
MECOM	No effect
MECP2	No effect
MEF2A	No effect
MEF2B	No effect
MEF2C	No effect
MEF2D	No effect
MEIS1	No effect
MEIS2	No effect
MEIS3	No effect
MEOX1	No effect
MEOX2	No effect
MESP1	Depleted
MGA	No effect
MITF	No effect
MIXL1	No effect
MLX	No effect
MLXIPL	No effect
MNT	No effect
MNX1	No effect
MSC	No effect
MSGN1	Depleted
MSX1	No effect
MSX2	No effect
MTF1	No effect
MXI1	No effect
MYB	No effect
MYBL2	No effect
MYC	No effect
MYCN	No effect
MYF6	No effect
MYOD1	No effect
MYOG	No effect
MZF1	No effect
NEUROD1	Depleted
NEUROD2	Depleted
NEUROG2	Depleted
NFAT5	No effect
NFATC1	No effect
NFATC2	No effect
NFATC3	No effect
NFATC4	No effect
NFE2	Depleted
NFE2L1	Depleted
NFE2L2	No effect
NFIA	No effect
NFIB	No effect
NFIC	No effect
NFIL3	No effect
NFIX	No effect
NFKB1	No effect
NFKB2	No effect
NFYA	No effect
NFYB	No effect
NFYC	No effect
NHLH1	No effect
NKX2-1	No effect
NKX2-3	No effect
NKX2-5	No effect
NKX2-8	No effect
NKX3-1	No effect
NKX3-2	No effect
NKX6-1	No effect
NKX6-2	No effect
NOBOX	No effect
NOTO	No effect
NR1D1	No effect
NR1H3	No effect
NR1H4	No effect
NR1I2	No effect
NR1I3	No effect
NR2C1	No effect
NR2C2	No effect
NR2E1	No effect
NR2E3	No effect
NR2F1	No effect
NR2F2	No effect
NR2F6	No effect
NR3C1	No effect
NR3C2	No effect
NR4A1	No effect
NR4A2	No effect
NR5A1	No effect
NR5A2	No effect
NR6A1	No effect
NRF1	No effect
NRL	No effect
OLIG1	No effect
OLIG2	Depleted
OLIG3	No effect
ONECUT1	No effect
ONECUT2	No effect
ONECUT3	No effect
OSR2	No effect
OTX1	No effect
OTX2	No effect
OVOL1	No effect
PAX1	No effect
PAX2	No effect
PAX3	No effect
PAX4	No effect
PAX5	No effect
PAX6	No effect
PAX7	No effect
PAX9	No effect
PBX1	No effect
PBX2	No effect
PBX3	No effect
PDX1	No effect
PGR	No effect
PHOX2A	No effect
PHOX2B	No effect
PITX1	No effect
PITX3	No effect
PKNOX1	No effect
PKNOX2	No effect
PLAG1	No effect
POU1F1	No effect
POU2F1	No effect
POU2F2	No effect
POU2F3	No effect
POU3F1	No effect
POU3F2	No effect
POU3F3	No effect
POU3F4	No effect
POU4F1	No effect
POU4F2	No effect
POU4F3	No effect
POU5F1	No effect
POU5F1B	No effect
POU6F1	No effect
POU6F2	No effect
PPARA	No effect
PPARG	No effect
PRDM1	No effect
PRDM14	No effect
PRDM4	No effect
PRDM6	No effect
PROP1	No effect
PROX1	No effect
PRRX1	No effect
PRRX2	No effect
PTF1A	Depleted
RARA	No effect
RARB	No effect
RARG	No effect
RAX	No effect
RAX2	No effect
RBPJ	No effect
REL	No effect
RELA	No effect
RELB	No effect
REST	No effect
RFX1	No effect
RFX2	No effect
RFX3	No effect
RFX4	No effect
RFX5	No effect
RHOXF1	No effect
RORA	No effect
RORB	No effect
RORC	No effect
RUNX1	No effect
RUNX2	No effect
RUNX3	No effect
RXRA	No effect
RXRB	No effect
RXRG	No effect
SCRT1	No effect
SCRT2	No effect
SHOX	No effect
SHOX2	No effect
SIX1	No effect
SIX2	No effect
SMAD2	No effect
SMAD4	No effect
SMARCA1	No effect
SMARCA5	No effect
SNAI1	Depleted
SNAI2	Depleted
SOX10	Depleted
SOX13	Depleted
SOX14	No effect
SOX15	Depleted
SOX17	Depleted
SOX18	No effect
SOX2	Depleted
SOX21	No effect
SOX3	Depleted
SOX4	Depleted
SOX5	No effect
SOX6	Depleted
SOX7	No effect
SOX8	No effect
SOX9	Depleted
SP1	No effect
SP3	No effect
SP4	No effect
SP8	No effect
SPDEF	Depleted
SPI1	No effect
SPIB	No effect
SPIC	No effect
SREBF1	No effect
SREBF2	No effect
SRF	No effect
SRY	Depleted
STAT1	Depleted
STAT2	Depleted
STAT3	No effect
STAT4	No effect
STAT5A	No effect
STAT5B	No effect
STAT6	No effect
TAL1	No effect
TBP	No effect
TBR1	No effect
TBX1	No effect
TBX15	No effect
TBX19	No effect
TBX2	No effect
TBX20	No effect
TBX21	Depleted
TBX3	Depleted
TBX4	No effect
TBX5	No effect
TCF12	Depleted
TCF3	Depleted
TCF4	Depleted
TCF7	No effect
TCF7L1	No effect
TCF7L2	No effect
TEAD1	No effect
TEAD2	No effect
TEAD3	No effect
TEAD4	No effect
TEF	No effect
TFAP2A	No effect
TFAP2B	No effect
TFAP2C	No effect
TFAP4	No effect
TFCP2	No effect
TFDP1	No effect
TFE3	No effect
TFEB	No effect
TFEC	No effect
TGIF1	No effect
TGIF2	No effect
TGIF2LX	No effect
THAP1	No effect
THAP11	No effect
THRA	No effect
THRB	No effect
TP53	No effect
TP63	No effect
TP73	No effect
TWIST1	Depleted
UNCX	No effect
USF1	No effect
USF2	No effect
VAX1	No effect
VAX2	No effect
VDR	No effect
VENTX	No effect
VSX1	No effect
VSX2	No effect
XBP1	No effect
YY1	No effect
YY2	No effect
ZBED1	No effect
ZBTB14	No effect
ZBTB18	No effect
ZBTB33	No effect
ZBTB48	No effect
ZBTB49	No effect
ZBTB6	No effect
ZBTB7A	Depleted
ZBTB7B	No effect
ZBTB7C	No effect
ZEB1	Depleted
ZFP28	No effect
ZFP42	No effect
ZFP82	No effect
ZFX	No effect
ZIC1	No effect
ZIC3	No effect
ZIC4	No effect
ZIM3	No effect
ZKSCAN1	No effect
ZNF121	No effect
ZNF134	No effect
ZNF136	No effect
ZNF140	No effect
ZNF143	No effect
ZNF146	No effect
ZNF18	No effect
ZNF214	No effect
ZNF232	No effect
ZNF24	Depleted
ZNF250	No effect
ZNF257	No effect
ZNF260	No effect
ZNF264	No effect
ZNF274	No effect
ZNF282	No effect
ZNF317	No effect
ZNF320	No effect
ZNF322	No effect
ZNF324	No effect
ZNF329	No effect
ZNF331	Depleted
ZNF335	No effect
ZNF350	No effect
ZNF354A	No effect
ZNF354C	No effect
ZNF382	No effect
ZNF384	No effect
ZNF394	No effect
ZNF41	No effect
ZNF410	No effect
ZNF418	No effect
ZNF436	No effect
ZNF449	No effect
ZNF490	No effect
ZNF502	No effect
ZNF524	No effect
ZNF528	No effect
ZNF547	No effect
ZNF549	No effect
ZNF554	No effect
ZNF563	Depleted
ZNF582	No effect
ZNF586	No effect
ZNF667	No effect
ZNF680	No effect
ZNF708	No effect
ZNF713	No effect
ZNF740	No effect
ZNF75A	No effect
ZNF76	No effect
ZNF768	No effect
ZNF784	No effect
ZNF816	No effect
ZSCAN31	No effect
ZSCAN4	No effect
