# Supplementary material for: High-throughput characterization of transcription factors that modulate UVdamage formation and repair at single-nucleotide resolution
Source: Research Square preprint supplement (doi:10.21203/rs.3.rs-8197218/v1), 2025-12-10
Supplement: Supplementary file 3 [file 613fcbb63ebcaf10fd6cc2db.xlsx]

## Sheet: TOC
Supplementary data for C>T mutation analysis discussed in the paper "High-throughput characterization of transcription factors that modulate UV damage formation and repair at single-nucleotide resolution", Wasserman et al. Included are results from high-throughput analyses of C>T mutation enrichment across 225 TF motif clusters curated from Vierstra et al. (2020). Mutations are from the Internati…
Table of Contents
#	Dataset	Cellular Context	Source	Analysis Description
1	CtoT_simulation	Skin cutaneous melanoma, skin carcinoma tumors	ICGC (Projects: SKCM-US, MELA-AU, SKCM-BR)	C>T mutation enrichment was assessed using a simulation methodology as described in the Supplementary Methods
Column Name		Content
TF_cluster		TF motif cluster name from Vierstra et al. (2020)
position		Position relative to the TF motif center
observed_count		Observed C>T mutations at aggregated TF binding site window position combined for both strands
simulation_mean		Mean of permutation simulation of C>T mutation signal
simulation_std_dev		Standard deviation of permutation simulation of C>T mutation signal
simulation_max		Maximum of permutation simulation of C>T mutation signal
simulation_min		Minimum of permutation simulation of C>T mutation signal
pval_emp_high		Empirical one-sided p-value from simulation to test C>T mutation enrichment
pval_emp_low		Empirical one-sided p-value from simulation to test C>T mutation depletion
qval_emp_high		Benjamini-Hochberg corrected p-value to test C>T mutation enrichment
qval_emp_low		Benjamini-Hochberg corrected p-value to test C>T mutation depletion
zscore		Z-score of observed C>T mutation signal
scaling_factor		Factor for scaling predicted signal to immediate flanking regions around the TF cluster. Briefly, predicted signal for each strand was scaled by multiplying the average ratio of observed-to-predicted signal in immediate flanking region

## Sheet: 1_CtoT_simulation
TF_cluster	position	observed_count	simulation_mean	simulation_std_dev	simulation_max	simulation_min	pval_emp_high	pval_emp_low	qval_emp_high	qval_emp_low	zscore	scaling_factor
AHR	-20	25	25.0289	5.54313	46.0323	6.05688	0.5025	0.4975	1	0.849896	-0.00520465	1.21138
AHR	-19	21	23.4054	5.35763	46.0323	6.05688	0.6454	0.3546	1	0.8077	-0.448961	1.21138
AHR	-18	31	23.5271	5.3434	50.8778	6.05688	0.0899	0.9101	0.941738	0.956772	1.39853	1.21138
AHR	-17	29	25.621	5.56865	54.5119	7.26826	0.2898	0.7102	0.941738	0.956772	0.606796	1.21138
AHR	-16	32	25.3347	5.5331	48.455	7.26826	0.1101	0.8899	0.941738	0.956772	1.20462	1.21138
AHR	-15	22	25.6244	5.65006	48.455	7.26826	0.7065	0.2935	1	0.707853	-0.641473	1.21138
AHR	-14	20	24.9586	5.55521	46.0323	6.05688	0.8089	0.1911	1	0.6027	-0.892601	1.21138
AHR	-13	24	26.974	5.77402	53.3006	8.47963	0.7105	0.2895	1	0.707853	-0.515058	1.21138
AHR	-12	24	24.9455	5.55359	49.6664	7.26826	0.5778	0.4222	1	0.849896	-0.170252	1.21138
AHR	-11	21	25.7936	5.60494	53.3006	7.26826	0.7893	0.2107	1	0.61705	-0.855244	1.21138
AHR	-10	32	25.525	5.5463	48.455	7.26826	0.1196	0.8804	0.941738	0.956772	1.16744	1.21138
AHR	-9	31	25.7728	5.61846	48.455	6.05688	0.1809	0.8191	0.941738	0.956772	0.930369	1.21138
AHR	-8	17	26.4821	5.65876	48.455	7.26826	0.95	0.05	1	0.42722	-1.67566	1.21138
AHR	-7	21	27.6286	5.8517	50.8778	7.26826	0.8673	0.1327	1	0.494609	-1.13276	1.21138
AHR	-6	32	24.8276	5.53564	48.455	8.47963	0.0987	0.9013	0.941738	0.956772	1.29567	1.21138
AHR	-5	28	23.5318	5.38138	46.0323	6.05688	0.1762	0.8238	0.941738	0.956772	0.830301	1.21138
AHR	-4	16	23.9289	5.37011	46.0323	4.8455	0.9292	0.0708	1	0.462129	-1.47649	1.21138
AHR	-3	24	24.0057	5.34382	47.2437	6.05688	0.5124	0.4876	1	0.849896	-0.00107071	1.21138
AHR	-2	24	23.2361	5.30806	44.8209	6.05688	0.4565	0.5435	1	0.89134	0.143907	1.21138
AHR	-1	4	4.61886	2.37469	14.5365	0	0.5307	0.4693	1	0.849896	-0.260605	1.21138
AHR	0	4	3.07582	1.86796	13.346	0	0.2986	0.7014	0.941738	0.956772	0.494755	1.16177
AHR	1	2	4.56501	2.20705	14.4582	0	0.9211	0.0789	1	0.462129	-1.16219	1.11217
AHR	2	0	0	0	0	0	1	1	1	1	0	1.11217
AHR	3	16	14.7418	4.06962	33.3651	2.22434	0.3509	0.6491	1	0.956772	0.309166	1.11217
AHR	4	6	14.1674	4.00474	32.2529	2.22434	0.9876	0.0124	1	0.2296	-2.03943	1.11217
AHR	5	14	19.8029	4.71875	38.9259	5.56085	0.8961	0.1039	1	0.48585	-1.22974	1.11217
AHR	6	12	21.2236	4.8641	41.1503	5.56085	0.9832	0.0168	1	0.2296	-1.89627	1.11217
AHR	7	13	22.7885	5.00723	43.3746	7.78519	0.9854	0.0146	1	0.2296	-1.95487	1.11217
AHR	8	25	22.3215	5.04105	51.1598	5.56085	0.2851	0.7149	0.941738	0.956772	0.531343	1.11217
AHR	9	16	22.1786	4.96336	45.599	6.67302	0.8915	0.1085	1	0.48585	-1.24484	1.11217
AHR	10	14	21.5785	4.91881	43.3746	4.44868	0.9479	0.0521	1	0.42722	-1.54073	1.11217
AHR	11	23	23.4752	5.19375	43.3746	6.67302	0.535	0.465	1	0.849896	-0.0915018	1.11217
AHR	12	21	22.2817	5.10064	44.4868	5.56085	0.6179	0.3821	1	0.824532	-0.251274	1.11217
AHR	13	26	22.3162	5.07033	46.7111	6.67302	0.2223	0.7777	0.941738	0.956772	0.726531	1.11217
AHR	14	20	23.2088	5.05733	44.4868	6.67302	0.7625	0.2375	1	0.649167	-0.634477	1.11217
AHR	15	17	21.5848	4.92673	41.1503	5.56085	0.8127	0.1873	1	0.6027	-0.930591	1.11217
AHR	16	25	21.9035	4.91699	42.2625	6.67302	0.2556	0.7444	0.941738	0.956772	0.629751	1.11217
AHR	17	38	21.1501	4.89358	41.1503	3.33651	0.0006	0.9994	0.0246	1	3.44326	1.11217
AHR	18	15	20.6723	4.81905	43.3746	3.33651	0.8815	0.1185	1	0.48585	-1.17707	1.11217
AHR	19	23	21.6157	4.97821	42.2625	6.67302	0.3871	0.6129	1	0.956772	0.278074	1.11217
AHR	20	25	21.0288	4.84936	40.0381	4.44868	0.2023	0.7977	0.941738	0.956772	0.818913	1.11217
AIRE	-20	3	2.35685	1.72495	12.2377	0	0.3054	0.6946	0.865442	0.862988	0.37285	1.22377
AIRE	-19	0	2.49881	1.74958	11.0139	0	0.8699	0	0.891648	0	-1.42823	1.22377
AIRE	-18	3	2.12507	1.6046	9.79013	0	0.2488	0.7512	0.865442	0.894269	0.545263	1.22377
AIRE	-17	1	1.76112	1.48174	9.79013	0	0.7574	0.2426	0.891648	0.663107	-0.513669	1.22377
AIRE	-16	1	2.33923	1.71714	11.0139	0	0.8502	0.1498	0.891648	0.472446	-0.779917	1.22377
AIRE	-15	4	2.49685	1.74861	11.0139	0	0.1524	0.8476	0.78105	0.950337	0.859626	1.22377
AIRE	-14	5	2.37178	1.70787	11.0139	0	0.0466	0.9534	0.636867	0.9869	1.53888	1.22377
AIRE	-13	1	2.04528	1.56289	9.79013	0	0.8136	0.1864	0.891648	0.545886	-0.668813	1.22377
AIRE	-12	0	2.22089	1.65534	9.79013	0	0.8367	0	0.891648	0	-1.34165	1.22377
AIRE	-11	4	2.38096	1.70663	12.2377	0	0.1337	0.8663	0.78105	0.950337	0.948675	1.22377
AIRE	-10	4	2.25455	1.65014	11.0139	0	0.1192	0.8808	0.78105	0.950337	1.05776	1.22377
AIRE	-9	2	1.64193	1.44045	8.56637	0	0.3819	0.6181	0.865442	0.812441	0.248583	1.22377
AIRE	-8	1	1.20174	1.20401	7.3426	0	0.6285	0.3715	0.891648	0.788318	-0.167556	1.22377
AIRE	-7	0	1.68757	1.43452	11.0139	0	0.7503	0	0.891648	0	-1.1764	1.22377
AIRE	-6	6	4.89996	2.46357	18.3565	0	0.3659	0.6341	0.865442	0.812441	0.446522	1.22377
AIRE	-5	5	6.67246	2.84569	19.5803	0	0.6339	0.3661	0.891648	0.788318	-0.587718	1.22377
AIRE	-4	0	0.101083	0.352533	3.6713	0	0.0791	0	0.78105	0	-0.286734	1.22377
AIRE	-3	0	0.478737	0.766396	4.89507	0	0.3237	0	0.865442	0	-0.624661	1.22377
AIRE	-2	4	1.21899	1.21947	9.79013	0	0.0177	0.9823	0.36285	0.9869	2.28051	1.22377
AIRE	-1	4	1.10641	1.15631	7.3426	0	0.0131	0.9869	0.36285	0.9869	2.50244	1.22377
AIRE	0	1	1.92233	1.77791	11.1504	0	0.6913	0.3087	0.891648	0.770318	-0.518772	1.40834
AIRE	1	0	0.240371	0.625804	6.37166	0	0.1389	0	0.78105	0	-0.384099	1.59292
AIRE	2	0	0.683998	1.05236	7.96458	0	0.347	0	0.865442	0	-0.649965	1.59292
AIRE	3	5	5.91115	3.08125	22.3008	0	0.5066	0.4934	0.865442	0.812441	-0.295708	1.59292
AIRE	4	2	9.64622	4.03024	27.0796	0	0.9808	0.0192	0.9808	0.0715636	-1.89721	1.59292
AIRE	5	1	1.8344	1.71187	11.1504	0	0.6806	0.3194	0.891648	0.770318	-0.487421	1.59292
AIRE	6	0	3.05059	2.253	15.9292	0	0.8463	0	0.891648	0	-1.35401	1.59292
AIRE	7	0	0.812227	1.13573	7.96458	0	0.401	0	0.865442	0	-0.715159	1.59292
AIRE	8	2	2.22721	1.90816	15.9292	0	0.4025	0.5975	0.865442	0.812441	-0.119075	1.59292
AIRE	9	2	2.54166	2.01642	12.7433	0	0.4749	0.5251	0.865442	0.812441	-0.268622	1.59292
AIRE	10	0	3.02702	2.25529	14.3362	0	0.8416	0	0.891648	0	-1.34219	1.59292
AIRE	11	2	2.44066	1.98746	12.7433	0	0.455	0.545	0.865442	0.812441	-0.221723	1.59292
AIRE	12	1	3.03466	2.18379	12.7433	0	0.8523	0.1477	0.891648	0.472446	-0.93171	1.59292
AIRE	13	2	2.31339	1.92015	11.1504	0	0.425	0.575	0.865442	0.812441	-0.163211	1.59292
AIRE	14	3	3.27583	2.31303	14.3362	0	0.6089	0.3911	0.891648	0.788318	-0.11925	1.59292
AIRE	15	2	2.65045	2.0657	15.9292	0	0.4942	0.5058	0.865442	0.812441	-0.314882	1.59292
AIRE	16	2	3.1159	2.24741	15.9292	0	0.577	0.423	0.891648	0.788318	-0.496529	1.59292
AIRE	17	3	2.35943	1.9263	12.7433	0	0.44	0.56	0.865442	0.812441	0.332541	1.59292
AIRE	18	3	2.50502	2.00991	12.7433	0	0.4675	0.5325	0.865442	0.812441	0.246271	1.59292
AIRE	19	4	2.64105	2.02732	14.3362	0	0.2366	0.7634	0.865442	0.894269	0.670316	1.59292
AIRE	20	3	3.13263	2.25716	14.3362	0	0.5819	0.4181	0.891648	0.788318	-0.0587583	1.59292
AP1_1	-20	106	107.921	9.9865	144.134	72.9909	0.5779	0.4221	1	0.786641	-0.19233	0.923936
AP1_1	-19	128	104.137	9.92758	147.83	67.4473	0.009	0.991	0.1066	1	2.40375	0.923936
AP1_1	-18	104	106.121	9.79645	145.058	72.067	0.5807	0.4193	1	0.786641	-0.216466	0.923936
AP1_1	-17	116	108.403	9.86406	143.21	67.4473	0.2222	0.7778	0.8774	1	0.770161	0.923936
AP1_1	-16	106	112.031	10.252	157.069	72.067	0.7271	0.2729	1	0.616295	-0.588232	0.923936
AP1_1	-15	98	104.322	9.88343	140.438	67.4473	0.7209	0.2791	1	0.616295	-0.639616	0.923936
AP1_1	-14	101	105.677	9.96783	147.83	71.1431	0.6705	0.3295	1	0.675475	-0.469193	0.923936
AP1_1	-13	87	106.76	9.96175	149.678	66.5234	0.9781	0.0219	1	0.112237	-1.98355	0.923936
AP1_1	-12	97	109.528	10.0403	147.83	72.067	0.9042	0.0958	1	0.357073	-1.24779	0.923936
AP1_1	-11	115	108.916	10.0584	149.678	75.7627	0.2656	0.7344	0.907467	1	0.604897	0.923936
AP1_1	-10	126	109.806	10.014	147.83	72.067	0.0539	0.9461	0.368317	1	1.61713	0.923936
AP1_1	-9	106	106.377	9.90918	149.678	71.1431	0.5163	0.4837	1	0.814588	-0.0380167	0.923936
AP1_1	-8	114	111.888	10.1991	148.754	72.067	0.4119	0.5881	1	0.911415	0.207042	0.923936
AP1_1	-7	150	122.258	10.6228	167.232	85.0021	0.0049	0.9951	0.10045	1	2.61153	0.923936
AP1_1	-6	107	112.595	10.2551	155.221	78.5346	0.7144	0.2856	1	0.616295	-0.54559	0.923936
AP1_1	-5	101	128.815	10.8912	184.787	88.6978	0.9952	0.0048	1	0.0355333	-2.55389	0.923936
AP1_1	-4	49	63.7564	7.71808	93.3175	36.0335	0.974	0.026	1	0.118444	-1.91192	0.923936
AP1_1	-3	0	0	0	0	0	1	1	1	1	0	0.923936
AP1_1	-2	100	256.075	14.9466	320.606	201.418	1	0	1	0	-10.4422	0.923936
AP1_1	-1	1	0.135449	0.355353	2.77181	0	0.0104	0.9896	0.1066	1	2.43294	0.923936
AP1_1	0	14	37.098	7.86283	69.5253	12.0511	0.9996	0.0004	1	0.0041	-2.93761	0.92547
AP1_1	1	0	0.0893632	0.288292	2.78101	0	0.0919	0	0.470988	0	-0.309975	0.927004
AP1_1	2	101	262.376	15.0524	327.232	208.576	1	0	1	0	-10.721	0.927004
AP1_1	3	0	0	0	0	0	1	1	1	1	0	0.927004
AP1_1	4	48	58.0973	7.35356	88.9924	29.6641	0.9232	0.0768	1	0.31488	-1.37312	0.927004
AP1_1	5	101	128.531	11.0015	176.131	86.2114	0.9948	0.0052	1	0.0355333	-2.50246	0.927004
AP1_1	6	117	114.725	10.3505	158.518	75.0873	0.3998	0.6002	1	0.911415	0.219803	0.927004
AP1_1	7	154	124.118	10.7706	165.934	86.2114	0.0037	0.9963	0.10045	1	2.7744	0.927004
AP1_1	8	115	115.799	10.4141	163.153	75.0873	0.5033	0.4967	1	0.814588	-0.0767635	0.927004
AP1_1	9	99	106.77	9.86124	143.686	74.1603	0.7895	0.2105	1	0.575367	-0.787927	0.927004
AP1_1	10	124	109.453	10.0044	149.248	72.3063	0.0782	0.9218	0.458029	1	1.45409	0.927004
AP1_1	11	114	108.522	10.055	149.248	72.3063	0.3041	0.6959	0.959085	1	0.544831	0.927004
AP1_1	12	100	109.891	10.123	150.175	76.0143	0.8422	0.1578	1	0.462129	-0.977095	0.927004
AP1_1	13	86	109.757	10.1334	152.956	68.5983	0.9928	0.0072	1	0.0421714	-2.34443	0.927004
AP1_1	14	107	107.451	10.0651	149.248	73.2333	0.5105	0.4895	1	0.814588	-0.0448367	0.927004
AP1_1	15	96	106.018	9.96589	148.321	71.3793	0.8457	0.1543	1	0.462129	-1.00526	0.927004
AP1_1	16	104	110.537	10.1391	147.394	75.0873	0.7302	0.2698	1	0.616295	-0.644734	0.927004
AP1_1	17	122	109.468	10.0407	149.248	75.0873	0.109	0.891	0.496556	1	1.24815	0.927004
AP1_1	18	95	105.945	9.87764	143.686	71.3793	0.8664	0.1336	1	0.456467	-1.10811	0.927004
AP1_1	19	126	104.512	9.88582	142.759	67.6713	0.0184	0.9816	0.15088	1	2.17364	0.927004
AP1_1	20	114	106.442	9.96802	142.759	69.5253	0.2354	0.7646	0.8774	1	0.758229	0.927004
AP1_2	-20	75	69.7995	7.82907	106.767	41.1314	0.2555	0.7445	0.975427	0.953891	0.66426	0.875137
AP1_2	-19	68	68.2756	7.78603	104.141	39.3812	0.5174	0.4826	1	0.751007	-0.0353942	0.875137
AP1_2	-18	80	67.6197	7.72263	97.1402	39.3812	0.0577	0.9423	0.591425	0.9789	1.60312	0.875137
AP1_2	-17	67	68.055	7.70628	103.266	39.3812	0.5463	0.4537	1	0.751007	-0.136896	0.875137
AP1_2	-16	68	68.9952	7.78045	107.642	42.0066	0.5521	0.4479	1	0.751007	-0.127911	0.875137
AP1_2	-15	71	70.7999	7.9646	97.1402	42.8817	0.4688	0.5312	1	0.751007	0.025122	0.875137
AP1_2	-14	65	65.2398	7.5516	97.1402	35.0055	0.4926	0.5074	1	0.751007	-0.031757	0.875137
AP1_2	-13	71	64.6916	7.55084	95.39	35.0055	0.191	0.809	0.870111	0.974277	0.835453	0.875137
AP1_2	-12	61	70.8264	8.04909	104.141	42.0066	0.897	0.103	1	0.411864	-1.22081	0.875137
AP1_2	-11	63	74.6929	8.14023	110.267	43.7569	0.9354	0.0646	1	0.378371	-1.43643	0.875137
AP1_2	-10	73	72.2709	7.95133	102.391	43.7569	0.4486	0.5514	1	0.75358	0.0916914	0.875137
AP1_2	-9	86	70.3931	7.85943	104.141	42.8817	0.0258	0.9742	0.5289	0.9789	1.98576	0.875137
AP1_2	-8	71	71.0656	7.81673	107.642	44.632	0.4811	0.5189	1	0.751007	-0.00839291	0.875137
AP1_2	-7	83	74.8719	8.18289	109.392	48.1325	0.1683	0.8317	0.870111	0.974277	0.993301	0.875137
AP1_2	-6	76	65.0146	7.66066	98.8905	37.6309	0.0866	0.9134	0.71012	0.9789	1.434	0.875137
AP1_2	-5	48	52.9934	6.85864	78.7623	30.6298	0.779	0.221	1	0.503389	-0.728046	0.875137
AP1_2	-4	76	82.6037	8.52234	114.643	55.1336	0.7876	0.2124	1	0.503389	-0.774867	0.875137
AP1_2	-3	48	54.3037	6.92559	84.8883	32.3801	0.8329	0.1671	1	0.503389	-0.910199	0.875137
AP1_2	-2	11	7.71101	2.64316	19.253	0.875137	0.1112	0.8888	0.759867	0.9789	1.24434	0.875137
AP1_2	-1	53	151.2	11.4359	194.28	109.392	1	0	1	0	-8.58697	0.875137
AP1_2	0	6	15.1779	3.789	31.8206	2.72748	0.9973	0.0027	1	0.0369	-2.42224	0.892148
AP1_2	1	23	38.7885	6.22483	69.0961	17.274	0.9954	0.0046	1	0.04715	-2.53638	0.909159
AP1_2	2	6	7.18417	2.53569	19.0923	0	0.6744	0.3256	1	0.702611	-0.467004	0.909159
AP1_2	3	86	165.489	12.1306	213.652	127.282	1	0	1	0	-6.55277	0.909159
AP1_2	4	16	12.8952	3.45265	28.1839	1.81832	0.1882	0.8118	0.870111	0.974277	0.89924	0.909159
AP1_2	5	33	45.2832	6.46945	70.0052	23.6381	0.9733	0.0267	1	0.21894	-1.89865	0.909159
AP1_2	6	78	90.5334	9.07215	128.191	58.1862	0.9231	0.0769	1	0.394112	-1.38153	0.909159
AP1_2	7	74	80.9107	8.5954	120.009	50.0037	0.7817	0.2183	1	0.503389	-0.804	0.909159
AP1_2	8	69	75.872	8.37727	108.19	46.3671	0.8014	0.1986	1	0.503389	-0.82031	0.909159
AP1_2	9	77	77.8428	8.44625	112.736	45.458	0.5462	0.4538	1	0.751007	-0.0997879	0.909159
AP1_2	10	57	71.2001	8.0855	100.917	40.003	0.9647	0.0353	1	0.241217	-1.75624	0.909159
AP1_2	11	86	71.8337	8.08225	103.644	41.8213	0.043	0.957	0.587667	0.9789	1.75276	0.909159
AP1_2	12	91	74.3106	8.16334	103.644	46.3671	0.0211	0.9789	0.5289	0.9789	2.04444	0.909159
AP1_2	13	79	73.4459	8.19567	110.917	41.8213	0.2617	0.7383	0.975427	0.953891	0.677691	0.909159
AP1_2	14	63	72.522	8.0903	104.553	45.458	0.8794	0.1206	1	0.41205	-1.17696	0.909159
AP1_2	15	70	71.0161	7.95781	108.19	41.8213	0.5673	0.4327	1	0.751007	-0.127691	0.909159
AP1_2	16	60	69.9678	7.96205	103.644	44.5488	0.9083	0.0917	1	0.411864	-1.25191	0.909159
AP1_2	17	64	71.6245	8.06499	105.462	40.9122	0.8246	0.1754	1	0.503389	-0.945389	0.909159
AP1_2	18	70	69.5669	7.97731	99.0983	41.8213	0.491	0.509	1	0.751007	0.0542864	0.909159
AP1_2	19	60	69.3433	8.05446	99.0983	40.9122	0.8895	0.1105	1	0.411864	-1.16001	0.909159
AP1_2	20	68	67.3651	7.79267	100.917	38.1847	0.4723	0.5277	1	0.751007	0.081469	0.909159
ARI5A	-20	1	0.681602	0.889956	5.73257	0	0.4463	0.5537	0.589247	0.793703	0.357768	1.14651
ARI5A	-19	0	0.621754	0.837868	5.73257	0	0.4222	0	0.589247	0	-0.742067	1.14651
ARI5A	-18	2	0.599397	0.829407	5.73257	0	0.0977	0.9023	0.572243	1	1.68868	1.14651
ARI5A	-17	0	0.627372	0.84222	5.73257	0	0.4227	0	0.589247	0	-0.744903	1.14651
ARI5A	-16	0	0.589193	0.82474	5.73257	0	0.4011	0	0.589247	0	-0.714399	1.14651
ARI5A	-15	0	0.520517	0.776529	5.73257	0	0.3628	0	0.589247	0	-0.670313	1.14651
ARI5A	-14	0	0.445191	0.710988	5.73257	0	0.3239	0	0.589247	0	-0.626159	1.14651
ARI5A	-13	0	0.787081	0.947166	6.87908	0	0.4958	0	0.597876	0	-0.830986	1.14651
ARI5A	-12	1	0.663602	0.878299	5.73257	0	0.4386	0.5614	0.589247	0.793703	0.383011	1.14651
ARI5A	-11	0	0.432235	0.698252	5.73257	0	0.3157	0	0.589247	0	-0.619025	1.14651
ARI5A	-10	1	0.561906	0.792795	6.87908	0	0.392	0.608	0.589247	0.830933	0.552594	1.14651
ARI5A	-9	2	0.46514	0.739434	5.73257	0	0.0631	0.9369	0.51742	1	2.07572	1.14651
ARI5A	-8	0	0.603525	0.831483	5.73257	0	0.4093	0	0.589247	0	-0.725841	1.14651
ARI5A	-7	0	0.551129	0.79207	5.73257	0	0.3833	0	0.589247	0	-0.695808	1.14651
ARI5A	-6	0	0.454019	0.723325	4.58605	0	0.3264	0	0.589247	0	-0.627683	1.14651
ARI5A	-5	1	1.0893	1.11896	6.87908	0	0.6125	0.3875	0.697569	0.588426	-0.0798085	1.14651
ARI5A	-4	0	0.34682	0.627787	4.58605	0	0.2621	0	0.589247	0	-0.552449	1.14651
ARI5A	-3	0	0	0	0	0	1	1	1	1	0	1.14651
ARI5A	-2	0	0	0	0	0	1	1	1	1	0	1.14651
ARI5A	-1	0	0	0	0	0	1	1	1	1	0	1.14651
ARI5A	0	0	0	0	0	0	1	1	1	1	0	0.662758
ARI5A	1	0	0	0	0	0	1	1	1	1	0	0.179002
ARI5A	2	0	0.0142307	0.049667	0.358004	0	0.0776	0	0.530267	0	-0.286521	0.179002
ARI5A	3	2	0.0783314	0.118784	0.716009	0	0	1	0	1	16.1779	0.179002
ARI5A	4	0	0.140463	0.160547	1.07401	0	0.5392	0	0.631634	0	-0.874904	0.179002
ARI5A	5	0	0.100671	0.13599	0.895011	0	0.4257	0	0.589247	0	-0.740279	0.179002
ARI5A	6	0	0.0686115	0.111244	0.895011	0	0.3186	0	0.589247	0	-0.616768	0.179002
ARI5A	7	1	0.0784388	0.118767	0.716009	0	0	1	0	1	7.75941	0.179002
ARI5A	8	1	0.079656	0.119439	0.895011	0	0	1	0	1	7.70557	0.179002
ARI5A	9	0	0.074089	0.116727	0.716009	0	0.3352	0	0.589247	0	-0.634722	0.179002
ARI5A	10	0	0.0951218	0.130422	0.716009	0	0.4116	0	0.589247	0	-0.729338	0.179002
ARI5A	11	0	0.100223	0.133145	0.895011	0	0.4322	0	0.589247	0	-0.752736	0.179002
ARI5A	12	0	0.108064	0.139082	1.25302	0	0.4538	0	0.589247	0	-0.776977	0.179002
ARI5A	13	0	0.111035	0.142055	1.25302	0	0.4599	0	0.589247	0	-0.781634	0.179002
ARI5A	14	0	0.0779913	0.117776	0.716009	0	0.3542	0	0.589247	0	-0.6622	0.179002
ARI5A	15	0	0.092025	0.127639	0.895011	0	0.4039	0	0.589247	0	-0.720979	0.179002
ARI5A	16	0	0.0804794	0.120119	0.895011	0	0.3643	0	0.589247	0	-0.669997	0.179002
ARI5A	17	1	0.0968044	0.132339	0.895011	0	0	1	0	1	6.82484	0.179002
ARI5A	18	0	0.0544167	0.100212	0.716009	0	0.2595	0	0.589247	0	-0.543017	0.179002
ARI5A	19	0	0.0657117	0.109642	0.716009	0	0.3037	0	0.589247	0	-0.599332	0.179002
ARI5A	20	0	0.117443	0.145389	0.895011	0	0.4797	0	0.595991	0	-0.807788	0.179002
ARI5B	-20	3	1.65216	1.1573	6.17975	0	0.1782	0.8218	0.792791	0.966546	1.16465	0.772468
ARI5B	-19	1	1.51072	1.06638	6.17975	0	0.585	0.415	0.9594	0.708958	-0.478926	0.772468
ARI5B	-18	2	1.61168	1.12906	7.72468	0	0.3433	0.6567	0.940039	0.89749	0.343934	0.772468
ARI5B	-17	1	1.92507	1.25316	9.26962	0	0.6992	0.3008	0.9594	0.697	-0.738187	0.772468
ARI5B	-16	1	2.1195	1.28783	9.26962	0	0.7563	0.2437	0.9594	0.697	-0.869289	0.772468
ARI5B	-15	3	1.79607	1.17827	6.95221	0	0.2127	0.7873	0.792791	0.966546	1.02178	0.772468
ARI5B	-14	0	1.73056	1.16065	7.72468	0	0.8927	0	0.9594	0	-1.49102	0.772468
ARI5B	-13	1	1.90614	1.25355	8.49715	0	0.694	0.306	0.9594	0.697	-0.722864	0.772468
ARI5B	-12	1	1.97976	1.22895	7.72468	0	0.7242	0.2758	0.9594	0.697	-0.797231	0.772468
ARI5B	-11	2	1.69812	1.15163	8.49715	0	0.3783	0.6217	0.940039	0.8938	0.262137	0.772468
ARI5B	-10	5	2.06581	1.26111	8.49715	0	0.019	0.981	0.552475	1	2.32667	0.772468
ARI5B	-9	2	1.70059	1.1414	6.95221	0	0.3765	0.6235	0.940039	0.8938	0.262319	0.772468
ARI5B	-8	4	2.06002	1.25669	7.72468	0	0.0539	0.9461	0.552475	1	1.54372	0.772468
ARI5B	-7	0	1.69719	1.149	6.95221	0	0.8864	0	0.9594	0	-1.4771	0.772468
ARI5B	-6	3	1.66567	1.16207	7.72468	0	0.1749	0.8251	0.792791	0.966546	1.14823	0.772468
ARI5B	-5	1	2.00324	1.26811	8.49715	0	0.7292	0.2708	0.9594	0.697	-0.791131	0.772468
ARI5B	-4	0	1.21239	0.978425	6.17975	0	0.7901	0	0.9594	0	-1.23912	0.772468
ARI5B	-3	1	2.18137	1.335	8.49715	0	0.7671	0.2329	0.9594	0.697	-0.884921	0.772468
ARI5B	-2	1	2.56212	1.41995	9.26962	0	0.8405	0.1595	0.9594	0.697	-1.10012	0.772468
ARI5B	-1	1	1.09196	0.932827	6.95221	0	0.4112	0.5888	0.940039	0.8938	-0.0985832	0.772468
ARI5B	0	0	0	0	0	0	1	1	1	1	0	1.13674
ARI5B	1	0	0.0639428	0.306842	3.00201	0	0.0421	0	0.552475	0	-0.20839	1.50101
ARI5B	2	0	0.167512	0.500437	4.50302	0	0.1058	0	0.6847	0	-0.334732	1.50101
ARI5B	3	1	0.187626	0.534888	4.50302	0	0.1169	0.8831	0.6847	0.981451	1.51877	1.50101
ARI5B	4	4	5.20038	2.78819	19.5131	0	0.6699	0.3301	0.9594	0.708958	-0.430524	1.50101
ARI5B	5	3	4.38173	2.57499	18.0121	0	0.7919	0.2081	0.9594	0.697	-0.536599	1.50101
ARI5B	6	3	6.60007	3.12406	21.0141	0	0.936	0.064	0.9594	0.328	-1.15237	1.50101
ARI5B	7	3	4.47285	2.60709	16.5111	0	0.7965	0.2035	0.9594	0.697	-0.56494	1.50101
ARI5B	8	7	4.61994	2.65782	18.0121	0	0.1966	0.8034	0.792791	0.966546	0.895493	1.50101
ARI5B	9	2	3.07166	2.15532	15.0101	0	0.6049	0.3951	0.9594	0.708958	-0.497216	1.50101
ARI5B	10	2	2.99541	2.11763	15.0101	0	0.5921	0.4079	0.9594	0.708958	-0.470057	1.50101
ARI5B	11	2	3.2117	2.18054	13.509	0	0.6326	0.3674	0.9594	0.708958	-0.555689	1.50101
ARI5B	12	4	3.51055	2.29583	16.5111	0	0.4127	0.5873	0.940039	0.8938	0.213191	1.50101
ARI5B	13	0	3.86269	2.41567	16.5111	0	0.9248	0	0.9594	0	-1.59901	1.50101
ARI5B	14	2	3.93233	2.43038	16.5111	0	0.7356	0.2644	0.9594	0.697	-0.795074	1.50101
ARI5B	15	7	3.76977	2.43224	16.5111	0	0.1143	0.8857	0.6847	0.981451	1.32808	1.50101
ARI5B	16	6	3.70178	2.37686	16.5111	0	0.238	0.762	0.813167	0.966546	0.966915	1.50101
ARI5B	17	0	2.87037	2.0858	13.509	0	0.8509	0	0.9594	0	-1.37615	1.50101
ARI5B	18	2	3.26679	2.25246	16.5111	0	0.6369	0.3631	0.9594	0.708958	-0.562401	1.50101
ARI5B	19	8	3.5763	2.32963	15.0101	0	0.0373	0.9627	0.552475	1	1.89888	1.50101
ARI5B	20	4	3.2893	2.26019	18.0121	0	0.3678	0.6322	0.940039	0.8938	0.314441	1.50101
BATF	-20	20	22.4186	4.787	40.4476	6.06714	0.7028	0.2972	1	0.529791	-0.505238	1.01119
BATF	-19	18	23.5056	4.86097	43.4811	7.07833	0.8831	0.1169	1	0.34235	-1.13262	1.01119
BATF	-18	19	22.5871	4.76245	41.4588	6.06714	0.7871	0.2129	1	0.484939	-0.753214	1.01119
BATF	-17	24	22.0149	4.65038	41.4588	5.05595	0.3431	0.6569	1	0.872242	0.426866	1.01119
BATF	-16	22	22.7451	4.84154	46.5147	6.06714	0.5719	0.4281	1	0.675081	-0.153895	1.01119
BATF	-15	25	22.9265	4.86094	42.47	6.06714	0.3405	0.6595	1	0.872242	0.426565	1.01119
BATF	-14	22	21.7066	4.65114	38.4252	6.06714	0.4884	0.5116	1	0.723297	0.0630818	1.01119
BATF	-13	26	22.1644	4.77857	44.4923	6.06714	0.2187	0.7813	0.89667	0.925006	0.802674	1.01119
BATF	-12	27	22.9279	4.83221	45.5035	7.07833	0.2059	0.7941	0.89667	0.925006	0.842697	1.01119
BATF	-11	13	23.8459	4.91988	43.4811	8.08952	0.9937	0.0063	1	0.0369	-2.2045	1.01119
BATF	-10	20	22.717	4.84482	41.4588	6.06714	0.7229	0.2771	1	0.529791	-0.5608	1.01119
BATF	-9	22	21.9582	4.74905	42.47	6.06714	0.5026	0.4974	1	0.723297	0.00880567	1.01119
BATF	-8	11	23.1665	4.82072	45.5035	7.07833	0.9979	0.0021	1	0.01435	-2.52378	1.01119
BATF	-7	14	18.856	4.43462	40.4476	6.06714	0.8853	0.1147	1	0.34235	-1.09501	1.01119
BATF	-6	16	23.4593	4.83699	45.5035	9.10071	0.9523	0.0477	1	0.19557	-1.54214	1.01119
BATF	-5	8	9.06885	3.00658	22.2462	0	0.6712	0.3288	1	0.5617	-0.355504	1.01119
BATF	-4	25	30.6606	5.55449	53.593	13.1455	0.8544	0.1456	1	0.397973	-1.0191	1.01119
BATF	-3	24	31.7263	5.63227	55.6154	13.1455	0.9267	0.0733	1	0.273209	-1.37179	1.01119
BATF	-2	64	40.3281	6.38164	64.7161	18.2014	0.0001	0.9999	0.0041	0.9999	3.70938	1.01119
BATF	-1	34	29.099	5.43026	52.5819	12.1343	0.1878	0.8122	0.89667	0.925006	0.902535	1.01119
BATF	0	20	22.5597	4.62405	41.2169	6.70973	0.7296	0.2704	1	0.529791	-0.55357	0.984861
BATF	1	13	21.8807	4.5976	42.1754	6.70973	0.9817	0.0183	1	0.0833667	-1.9316	0.958533
BATF	2	13	9.14728	2.97138	21.0877	0	0.101	0.899	0.8282	0.969974	1.29661	0.958533
BATF	3	0	0.0100646	0.0977082	0.958533	0	0.0105	0	0.194067	0	-0.103007	0.958533
BATF	4	23	54.2063	7.11943	83.3923	30.673	1	0	1	0	-4.38325	0.958533
BATF	5	0	0.189885	0.427678	3.83413	0	0.1787	0	0.89667	0	-0.443992	0.958533
BATF	6	7	9.91592	3.11934	23.0048	0	0.8095	0.1905	1	0.459441	-0.934788	0.958533
BATF	7	0	1.66488	1.27893	7.66826	0	0.8187	0	1	0	-1.30177	0.958533
BATF	8	22	51.165	6.9089	77.6411	27.7974	1	0	1	0	-4.22137	0.958533
BATF	9	8	3.6083	1.87257	14.378	0	0.0142	0.9858	0.194067	0.9999	2.34528	0.958533
BATF	10	17	19.2901	4.30148	40.2584	5.7512	0.7118	0.2882	1	0.529791	-0.532394	0.958533
BATF	11	18	23.5049	4.70876	44.0925	6.70973	0.8927	0.1073	1	0.34235	-1.16909	0.958533
BATF	12	23	23.1552	4.76347	46.0096	6.70973	0.5424	0.4576	1	0.694874	-0.0325764	0.958533
BATF	13	31	22.4152	4.66682	43.134	4.79266	0.0374	0.9626	0.38335	0.9999	1.83954	0.958533
BATF	14	25	22.4095	4.63685	43.134	7.66826	0.2505	0.7495	0.897558	0.925006	0.558669	0.958533
BATF	15	19	21.8521	4.59725	41.2169	5.7512	0.7448	0.2552	1	0.529791	-0.620383	0.958533
BATF	16	25	22.5335	4.66945	42.1754	7.66826	0.2627	0.7373	0.897558	0.925006	0.528226	0.958533
BATF	17	27	22.6622	4.68183	44.0925	8.62679	0.1561	0.8439	0.89667	0.935132	0.926518	0.958533
BATF	18	18	22.3253	4.61592	45.051	8.62679	0.8376	0.1624	1	0.41615	-0.937036	0.958533
BATF	19	13	23.1316	4.72894	45.051	5.7512	0.9897	0.0103	1	0.0527875	-2.14247	0.958533
BATF	20	21	21.6667	4.52604	41.2169	6.70973	0.5775	0.4225	1	0.675081	-0.147297	0.958533
BCL6_1	-20	0	0.492789	0.647406	4.30985	0	0.4375	0	0.593764	0	-0.761174	0.861971
BCL6_1	-19	1	0.728279	0.799698	5.17183	0	0.2086	0.7914	0.407267	1	0.339779	0.861971
BCL6_1	-18	0	0.678716	0.77072	5.17183	0	0.5437	0	0.593764	0	-0.880626	0.861971
BCL6_1	-17	0	0.644409	0.746075	5.17183	0	0.5269	0	0.593764	0	-0.863733	0.861971
BCL6_1	-16	0	0.592864	0.707656	5.17183	0	0.5018	0	0.593764	0	-0.837785	0.861971
BCL6_1	-15	2	0.739657	0.80059	4.30985	0	0.0573	0.9427	0.180715	1	1.57427	0.861971
BCL6_1	-14	2	0.592605	0.717206	5.17183	0	0.0333	0.9667	0.1517	1	1.96233	0.861971
BCL6_1	-13	0	0.527699	0.677771	6.0338	0	0.4561	0	0.593764	0	-0.77858	0.861971
BCL6_1	-12	0	0.648116	0.7398	5.17183	0	0.5319	0	0.593764	0	-0.876069	0.861971
BCL6_1	-11	2	0.51451	0.667719	4.30985	0	0.0246	0.9754	0.144086	1	2.22472	0.861971
BCL6_1	-10	2	0.59226	0.719559	5.17183	0	0.0322	0.9678	0.1517	1	1.95639	0.861971
BCL6_1	-9	1	0.68156	0.770379	5.17183	0	0.1882	0.8118	0.397495	1	0.413355	0.861971
BCL6_1	-8	0	0.473222	0.626607	4.30985	0	0.4296	0	0.593764	0	-0.755213	0.861971
BCL6_1	-7	0	0.186789	0.403162	3.44788	0	0.1939	0	0.397495	0	-0.46331	0.861971
BCL6_1	-6	0	0.558557	0.690632	5.17183	0	0.4802	0	0.593764	0	-0.808762	0.861971
BCL6_1	-5	1	0.3953	0.590266	4.30985	0	0.0803	0.9197	0.210637	1	1.02445	0.861971
BCL6_1	-4	0	0.10516	0.302953	2.58591	0	0.1142	0	0.275424	0	-0.347117	0.861971
BCL6_1	-3	0	0.27359	0.480612	2.58591	0	0.2742	0	0.511009	0	-0.569252	0.861971
BCL6_1	-2	0	0.62036	0.726822	4.30985	0	0.516	0	0.593764	0	-0.853524	0.861971
BCL6_1	-1	1	2.16441	1.36331	8.61971	0	0.7141	0.2859	0.7141	0.488412	-0.854103	0.861971
BCL6_1	0	0	0.26299	0.331528	2.48965	0	0.4695	0	0.593764	0	-0.793266	0.638456
BCL6_1	1	0	0.0558097	0.151111	1.24483	0	0.1268	0	0.288822	0	-0.369329	0.414942
BCL6_1	2	4	0.616894	0.506258	4.14942	0	0.0001	0.9999	0.00136667	1	6.68257	0.414942
BCL6_1	3	8	1.76126	0.847882	6.22413	0	0	1	0	1	7.35802	0.414942
BCL6_1	4	1	0.135105	0.236996	1.65977	0	0.0039	0.9961	0.03198	1	3.64941	0.414942
BCL6_1	5	0	0.0183404	0.0866928	0.829883	0	0.0435	0	0.162136	0	-0.211557	0.414942
BCL6_1	6	1	0.032158	0.115962	0.829883	0	0	1	0	1	8.34618	0.414942
BCL6_1	7	0	0.344236	0.376991	2.90459	0	0.5648	0	0.593764	0	-0.913113	0.414942
BCL6_1	8	2	0.966358	0.629421	4.14942	0	0.0822	0.9178	0.210637	1	1.64221	0.414942
BCL6_1	9	2	0.320252	0.371275	2.48965	0	0.0014	0.9986	0.01435	1	4.52426	0.414942
BCL6_1	10	0	0.249297	0.323734	2.07471	0	0.451	0	0.593764	0	-0.770066	0.414942
BCL6_1	11	0	0.428801	0.421934	2.90459	0	0.6458	0	0.661945	0	-1.01627	0.414942
BCL6_1	12	1	0.305563	0.358196	2.07471	0	0.0401	0.9599	0.162136	1	1.93871	0.414942
BCL6_1	13	1	0.367182	0.395817	2.48965	0	0.0637	0.9363	0.18655	1	1.59877	0.414942
BCL6_1	14	1	0.337721	0.375871	2.48965	0	0.05	0.95	0.170833	1	1.76198	0.414942
BCL6_1	15	0	0.314941	0.358917	2.90459	0	0.5332	0	0.593764	0	-0.877475	0.414942
BCL6_1	16	0	0.205313	0.294528	2.90459	0	0.3899	0	0.593764	0	-0.697093	0.414942
BCL6_1	17	1	0.218923	0.30404	2.90459	0	0.0165	0.9835	0.11275	1	2.56899	0.414942
BCL6_1	18	0	0.29714	0.353985	2.07471	0	0.5074	0	0.593764	0	-0.839413	0.414942
BCL6_1	19	0	0.340958	0.378574	2.48965	0	0.5566	0	0.593764	0	-0.900636	0.414942
BCL6_1	20	0	0.283654	0.341353	2.07471	0	0.4966	0	0.593764	0	-0.83097	0.414942
BCL6_2	-20	14	15.5094	4.14746	34.068	3.4068	0.6115	0.3885	0.849657	0.954221	-0.363944	1.1356
BCL6_2	-19	14	15.2536	4.21106	32.9324	2.2712	0.5808	0.4192	0.849657	0.954221	-0.29769	1.1356
BCL6_2	-18	13	17.3875	4.47506	35.2036	4.5424	0.834	0.166	0.969387	0.756222	-0.980433	1.1356
BCL6_2	-17	9	15.2878	4.15252	31.7968	2.2712	0.9567	0.0433	0.980618	0.591767	-1.51421	1.1356
BCL6_2	-16	21	16.6521	4.36963	35.2036	1.1356	0.1578	0.8422	0.53915	1	0.99503	1.1356
BCL6_2	-15	22	16.3824	4.32867	37.4748	3.4068	0.0965	0.9035	0.359682	1	1.29777	1.1356
BCL6_2	-14	14	15.6582	4.19169	34.068	2.2712	0.6208	0.3792	0.849657	0.954221	-0.395594	1.1356
BCL6_2	-13	17	16.6051	4.38058	37.4748	3.4068	0.4938	0.5062	0.849657	0.972445	0.0901549	1.1356
BCL6_2	-12	21	18.3924	4.61609	36.3392	3.4068	0.2767	0.7233	0.806607	1	0.564896	1.1356
BCL6_2	-11	19	16.8666	4.36282	37.4748	2.2712	0.3228	0.6772	0.827175	1	0.488996	1.1356
BCL6_2	-10	21	17.6021	4.51351	37.4748	2.2712	0.218	0.782	0.687538	1	0.752822	1.1356
BCL6_2	-9	17	16.503	4.36112	37.4748	2.2712	0.4906	0.5094	0.849657	0.972445	0.113966	1.1356
BCL6_2	-8	10	15.4554	4.2157	34.068	2.2712	0.9221	0.0779	0.969387	0.71422	-1.29406	1.1356
BCL6_2	-7	12	16.6065	4.38247	34.068	2.2712	0.8591	0.1409	0.969387	0.756222	-1.05113	1.1356
BCL6_2	-6	22	19.6903	4.74301	38.6104	5.678	0.2951	0.7049	0.806607	1	0.486977	1.1356
BCL6_2	-5	28	21.2461	4.93659	42.0172	4.5424	0.0949	0.9051	0.359682	1	1.36812	1.1356
BCL6_2	-4	10	10.5498	3.41357	26.1188	1.1356	0.5858	0.4142	0.849657	0.954221	-0.161071	1.1356
BCL6_2	-3	11	14.7602	4.07245	34.068	1.1356	0.8398	0.1602	0.969387	0.756222	-0.923321	1.1356
BCL6_2	-2	6	6.31052	2.69276	19.3052	0	0.4782	0.5218	0.849657	0.972445	-0.115318	1.1356
BCL6_2	-1	57	95.2054	10.4754	135.136	57.9155	1	0	1	0	-3.64717	1.1356
BCL6_2	0	36	19.8164	4.29477	36.7134	5.64822	0.0004	0.9996	0.0082	1	3.76821	1.03848
BCL6_2	1	0	0.428888	0.648163	5.64822	0	0.3599	0	0.849657	0	-0.661698	0.94137
BCL6_2	2	29	28.1825	5.15211	48.9513	11.2964	0.445	0.555	0.849657	0.978192	0.158681	0.94137
BCL6_2	3	120	72.1806	8.20607	111.082	43.303	0	1	0	1	5.82732	0.94137
BCL6_2	4	27	16.001	3.87114	34.8307	2.82411	0.0043	0.9957	0.03936	1	2.84128	0.94137
BCL6_2	5	2	2.25006	1.46823	9.4137	0	0.4274	0.5726	0.849657	0.978192	-0.170316	0.94137
BCL6_2	6	20	9.93522	3.05047	24.4756	0.94137	0.0012	0.9988	0.0164	1	3.29942	0.94137
BCL6_2	7	20	13.5074	3.62715	32.0066	2.82411	0.0382	0.9618	0.228429	1	1.78999	0.94137
BCL6_2	8	21	15.6854	3.86578	32.0066	3.76548	0.0807	0.9193	0.359682	1	1.37478	0.94137
BCL6_2	9	27	15.6421	3.85424	31.0652	2.82411	0.0048	0.9952	0.03936	1	2.94686	0.94137
BCL6_2	10	11	15.9536	3.90274	32.0066	1.88274	0.9129	0.0871	0.969387	0.71422	-1.26926	0.94137
BCL6_2	11	14	14.9508	3.76968	29.1825	3.76548	0.6217	0.3783	0.849657	0.954221	-0.252234	0.94137
BCL6_2	12	10	14.1203	3.6127	31.0652	2.82411	0.884	0.116	0.969387	0.756222	-1.1405	0.94137
BCL6_2	13	12	15.0049	3.74321	32.0066	1.88274	0.8057	0.1943	0.969387	0.79663	-0.802754	0.94137
BCL6_2	14	12	13.5788	3.5442	28.2411	1.88274	0.6821	0.3179	0.902132	0.954221	-0.445459	0.94137
BCL6_2	15	12	14.0795	3.62751	28.2411	1.88274	0.7308	0.2692	0.936338	0.954221	-0.573261	0.94137
BCL6_2	16	13	13.339	3.50847	29.1825	1.88274	0.5578	0.4422	0.849657	0.954221	-0.0966314	0.94137
BCL6_2	17	18	13.0443	3.46515	30.1238	1.88274	0.0693	0.9307	0.355162	1	1.43016	0.94137
BCL6_2	18	20	13.5635	3.58367	29.1825	0.94137	0.039	0.961	0.228429	1	1.79605	0.94137
BCL6_2	19	16	14.6165	3.71144	30.1238	2.82411	0.3879	0.6121	0.849657	1	0.372775	0.94137
BCL6_2	20	13	13.6987	3.59018	28.2411	2.82411	0.5902	0.4098	0.849657	0.954221	-0.194621	0.94137
CCAAT_CEBP	-20	27	22.7689	5.19724	41.8528	4.78318	0.2102	0.7898	0.615586	1	0.81411	1.19579
CCAAT_CEBP	-19	27	23.1415	5.21957	45.4402	7.17476	0.2296	0.7704	0.6273	1	0.73924	1.19579
CCAAT_CEBP	-18	16	21.621	5.11833	40.657	4.78318	0.8607	0.1393	0.931779	1	-1.09822	1.19579
CCAAT_CEBP	-17	29	23.0532	5.25182	45.4402	4.78318	0.1183	0.8817	0.532627	1	1.13232	1.19579
CCAAT_CEBP	-16	24	21.2033	5.00835	41.8528	5.97897	0.2467	0.7533	0.6273	1	0.558399	1.19579
CCAAT_CEBP	-15	15	22.2144	5.23468	43.0486	4.78318	0.9244	0.0756	0.971805	1	-1.37819	1.19579
CCAAT_CEBP	-14	19	20.9937	5.06427	45.4402	5.97897	0.676	0.324	0.923867	1	-0.393683	1.19579
CCAAT_CEBP	-13	22	22.2489	5.21323	41.8528	5.97897	0.4932	0.5068	0.808848	1	-0.0477522	1.19579
CCAAT_CEBP	-12	29	25.8821	5.5625	49.0276	7.17476	0.2601	0.7399	0.6273	1	0.560517	1.19579
CCAAT_CEBP	-11	10	22.6754	5.19794	44.2444	5.97897	0.9969	0.0031	0.9969	0.1271	-2.43854	1.19579
CCAAT_CEBP	-10	30	22.1932	5.15005	41.8528	4.78318	0.0624	0.9376	0.4264	1	1.51587	1.19579
CCAAT_CEBP	-9	28	23.6308	5.38588	46.636	5.97897	0.1976	0.8024	0.615586	1	0.811232	1.19579
CCAAT_CEBP	-8	45	24.1406	5.3781	49.0276	4.78318	0.0002	0.9998	0.0041	1	3.87859	1.19579
CCAAT_CEBP	-7	29	23.4617	5.36659	49.0276	7.17476	0.1408	0.8592	0.532627	1	1.03199	1.19579
CCAAT_CEBP	-6	30	31.9749	6.22709	56.2023	11.9579	0.5858	0.4142	0.857779	1	-0.317152	1.19579
CCAAT_CEBP	-5	13	12.0236	3.81679	31.0906	1.19579	0.4199	0.5801	0.766165	1	0.25582	1.19579
CCAAT_CEBP	-4	1	0.490395	0.760208	4.78318	0	0.3393	0.6607	0.730415	1	0.67035	1.19579
CCAAT_CEBP	-3	14	18.8727	4.73934	41.8528	4.78318	0.8636	0.1364	0.931779	1	-1.02815	1.19579
CCAAT_CEBP	-2	12	15.275	4.29026	32.2864	2.39159	0.7268	0.2732	0.925635	1	-0.763346	1.19579
CCAAT_CEBP	-1	6	10.1731	3.53737	28.6991	0	0.8518	0.1482	0.931779	1	-1.17972	1.19579
CCAAT_CEBP	0	14	9.0021	3.13708	22.6517	0	0.0844	0.9156	0.494343	1	1.59317	1.13722
CCAAT_CEBP	1	2	1.35349	1.20597	7.55056	0	0.3563	0.6437	0.730415	1	0.536091	1.07865
CCAAT_CEBP	2	5	4.92458	2.31032	17.2584	0	0.4816	0.5184	0.808848	1	0.0326445	1.07865
CCAAT_CEBP	3	1	0.611919	0.819014	5.39325	0	0.4298	0.5702	0.766165	1	0.47384	1.07865
CCAAT_CEBP	4	13	9.98496	3.31598	24.809	1.07865	0.1429	0.8571	0.532627	1	0.909245	1.07865
CCAAT_CEBP	5	30	28.2648	5.5665	48.5393	10.7865	0.39	0.61	0.761429	1	0.31173	1.07865
CCAAT_CEBP	6	32	20.4482	4.67929	42.0674	6.47191	0.0108	0.9892	0.1107	1	2.46871	1.07865
CCAAT_CEBP	7	42	21.3722	4.79762	40.9887	6.47191	0	1	0	1	4.29959	1.07865
CCAAT_CEBP	8	33	20.7583	4.70429	42.0674	6.47191	0.0079	0.9921	0.107967	1	2.60224	1.07865
CCAAT_CEBP	9	17	20.2366	4.69224	39.9101	5.39325	0.7676	0.2324	0.925635	1	-0.689771	1.07865
CCAAT_CEBP	10	17	21.0136	4.71912	42.0674	7.55056	0.8169	0.1831	0.931779	1	-0.850505	1.07865
CCAAT_CEBP	11	24	21.5999	4.81811	43.146	4.3146	0.2777	0.7223	0.632539	1	0.498146	1.07865
CCAAT_CEBP	12	27	21.6617	4.82159	40.9887	4.3146	0.1164	0.8836	0.532627	1	1.10717	1.07865
CCAAT_CEBP	13	18	18.8797	4.52753	37.7528	3.23595	0.5785	0.4215	0.857779	1	-0.194308	1.07865
CCAAT_CEBP	14	17	19.7972	4.56372	38.8314	4.3146	0.748	0.252	0.925635	1	-0.612928	1.07865
CCAAT_CEBP	15	23	18.8025	4.5074	38.8314	3.23595	0.1636	0.8364	0.558967	1	0.931246	1.07865
CCAAT_CEBP	16	12	20.0906	4.69473	39.9101	5.39325	0.9591	0.0409	0.983078	0.83845	-1.72334	1.07865
CCAAT_CEBP	17	19	19.2817	4.58268	38.8314	4.3146	0.5176	0.4824	0.816215	1	-0.0614812	1.07865
CCAAT_CEBP	18	16	18.8459	4.47661	35.5955	5.39325	0.7571	0.2429	0.925635	1	-0.635719	1.07865
CCAAT_CEBP	19	18	19.6955	4.65375	40.9887	5.39325	0.6511	0.3489	0.920521	1	-0.364334	1.07865
CCAAT_CEBP	20	28	19.3267	4.56476	42.0674	3.23595	0.0422	0.9578	0.34604	1	1.90005	1.07865
CENBP	-20	7	6.17529	2.54324	17.8887	0	0.3773	0.6227	0.765754	0.941728	0.324277	1.05228
CENBP	-19	5	7.0472	2.73135	18.941	0	0.7959	0.2041	0.9827	0.83681	-0.749521	1.05228
CENBP	-18	4	7.11002	2.75197	19.9933	0	0.9026	0.0974	0.9827	0.731167	-1.13011	1.05228
CENBP	-17	6	6.60146	2.64817	19.9933	0	0.5886	0.4114	0.86001	0.941728	-0.227122	1.05228
CENBP	-16	7	7.31753	2.78466	21.0455	0	0.5413	0.4587	0.821974	0.941728	-0.114029	1.05228
CENBP	-15	10	6.75256	2.68938	16.8364	0	0.117	0.883	0.589033	1	1.2075	1.05228
CENBP	-14	7	6.07595	2.52596	18.941	0	0.3568	0.6432	0.765754	0.941728	0.365822	1.05228
CENBP	-13	8	6.91556	2.72031	18.941	0	0.3404	0.6596	0.765754	0.941728	0.398645	1.05228
CENBP	-12	13	7.70067	2.85135	19.9933	0	0.0363	0.9637	0.372075	1	1.85854	1.05228
CENBP	-11	9	6.49549	2.63346	17.8887	0	0.1704	0.8296	0.69864	1	0.951032	1.05228
CENBP	-10	12	6.65312	2.64872	17.8887	0	0.0292	0.9708	0.372075	1	2.01866	1.05228
CENBP	-9	8	5.24697	2.36142	16.8364	0	0.1293	0.8707	0.589033	1	1.16584	1.05228
CENBP	-8	2	5.85497	2.47722	16.8364	0	0.9769	0.0231	0.9827	0.3157	-1.55617	1.05228
CENBP	-7	12	16.3082	4.15914	34.7251	3.15683	0.8436	0.1564	0.9827	0.83681	-1.03584	1.05228
CENBP	-6	17	18.7524	4.51282	38.9342	5.26138	0.6083	0.3917	0.86001	0.941728	-0.388318	1.05228
CENBP	-5	10	9.7908	3.20965	24.2024	1.05228	0.4534	0.5466	0.765754	0.941728	0.0651777	1.05228
CENBP	-4	0	3.03477	1.78013	10.5228	0	0.9436	0	0.9827	0	-1.7048	1.05228
CENBP	-3	5	7.09824	2.77705	19.9933	0	0.7983	0.2017	0.9827	0.83681	-0.755564	1.05228
CENBP	-2	4	7.37015	2.8065	19.9933	0	0.9174	0.0826	0.9827	0.731167	-1.20083	1.05228
CENBP	-1	7	3.76789	2.00211	17.8887	0	0.0738	0.9262	0.5043	1	1.61436	1.05228
CENBP	0	24	14.8992	4.06655	36.3021	1.13444	0.015	0.985	0.3075	1	2.23797	1.09336
CENBP	1	7	9.40395	3.26078	22.6888	1.13444	0.7228	0.2772	0.966939	0.941728	-0.737229	1.13444
CENBP	2	4	7.40858	2.8794	22.6888	0	0.893	0.107	0.9827	0.731167	-1.18378	1.13444
CENBP	3	7	6.37363	2.66667	19.2855	0	0.3339	0.6661	0.765754	0.941728	0.234889	1.13444
CENBP	4	7	4.7212	2.32784	14.7477	0	0.1289	0.8711	0.589033	1	0.978934	1.13444
CENBP	5	28	10.3901	3.40459	24.9577	1.13444	0	1	0	1	5.1724	1.13444
CENBP	6	3	2.52935	1.67179	10.21	0	0.386	0.614	0.765754	0.941728	0.281525	1.13444
CENBP	7	2	3.54581	1.99659	13.6133	0	0.8229	0.1771	0.9827	0.83681	-0.774222	1.13444
CENBP	8	7	5.77408	2.57017	19.2855	0	0.2499	0.7501	0.765754	1	0.476983	1.13444
CENBP	9	7	7.45849	2.92679	20.4199	0	0.4856	0.5144	0.765754	0.941728	-0.156654	1.13444
CENBP	10	7	7.35084	2.91153	21.5544	0	0.4707	0.5293	0.765754	0.941728	-0.120499	1.13444
CENBP	11	9	7.47653	2.95754	23.8233	0	0.3451	0.6549	0.765754	0.941728	0.515114	1.13444
CENBP	12	8	7.59156	2.94187	21.5544	0	0.3554	0.6446	0.765754	0.941728	0.138836	1.13444
CENBP	13	2	6.61413	2.69015	21.5544	0	0.9827	0.0173	0.9827	0.3157	-1.7152	1.13444
CENBP	14	7	7.20132	2.83617	19.2855	0	0.4449	0.5551	0.765754	0.941728	-0.0709816	1.13444
CENBP	15	8	6.57408	2.75381	18.1511	0	0.2365	0.7635	0.765754	1	0.517798	1.13444
CENBP	16	5	6.9607	2.84729	20.4199	0	0.7311	0.2689	0.966939	0.941728	-0.688621	1.13444
CENBP	17	9	8.05736	3.01221	22.6888	0	0.4134	0.5866	0.765754	0.941728	0.312938	1.13444
CENBP	18	7	7.40098	2.92591	21.5544	0	0.4784	0.5216	0.765754	0.941728	-0.137044	1.13444
CENBP	19	7	7.22412	2.83819	20.4199	0	0.458	0.542	0.765754	0.941728	-0.0789652	1.13444
CENBP	20	12	6.96263	2.79492	18.1511	0	0.0498	0.9502	0.40836	1	1.80233	1.13444
CPEB1	-20	1	3.56	2.29735	16.5363	0	0.9135	0.0865	1	0.399191	-1.11433	1.37803
CPEB1	-19	1	3.30465	2.13646	15.1583	0	0.9095	0.0905	1	0.399191	-1.07872	1.37803
CPEB1	-18	1	3.1131	2.064	12.4022	0	0.8958	0.1042	1	0.399191	-1.02379	1.37803
CPEB1	-17	3	3.51507	2.22383	13.7803	0	0.471	0.529	0.877773	0.970997	-0.231615	1.37803
CPEB1	-16	6	3.34213	2.16708	13.7803	0	0.1031	0.8969	0.6888	1	1.22647	1.37803
CPEB1	-15	4	3.3832	2.17206	13.7803	0	0.4444	0.5556	0.877773	0.970997	0.283973	1.37803
CPEB1	-14	5	3.80129	2.28921	15.1583	0	0.299	0.701	0.721118	0.970997	0.523636	1.37803
CPEB1	-13	7	3.28825	2.14189	12.4022	0	0.036	0.964	0.5248	1	1.73294	1.37803
CPEB1	-12	4	3.54043	2.28889	12.4022	0	0.4665	0.5335	0.877773	0.970997	0.200784	1.37803
CPEB1	-11	5	3.43584	2.20045	13.7803	0	0.2409	0.7591	0.6888	0.970997	0.710838	1.37803
CPEB1	-10	1	3.44521	2.20038	13.7803	0	0.9144	0.0856	1	0.399191	-1.11126	1.37803
CPEB1	-9	3	3.26289	2.13979	15.1583	0	0.4217	0.5783	0.877773	0.970997	-0.122859	1.37803
CPEB1	-8	3	3.35054	2.16528	16.5363	0	0.445	0.555	0.877773	0.970997	-0.16189	1.37803
CPEB1	-7	2	3.04131	2.07171	13.7803	0	0.643	0.357	1	0.861	-0.502631	1.37803
CPEB1	-6	0	3.00617	2.09287	13.7803	0	0.8796	0	1	0	-1.43638	1.37803
CPEB1	-5	1	2.73208	2.00289	13.7803	0	0.8556	0.1444	1	0.455415	-0.864789	1.37803
CPEB1	-4	3	6.96441	3.15641	24.8045	0	0.8752	0.1248	1	0.4264	-1.25599	1.37803
CPEB1	-3	5	5.79295	2.84178	17.9144	0	0.5992	0.4008	1	0.912933	-0.279034	1.37803
CPEB1	-2	2	1.03132	1.19466	6.89014	0	0.1773	0.8227	0.6888	0.970997	0.810847	1.37803
CPEB1	-1	0	0.0644917	0.294957	2.75605	0	0.0462	0	0.5248	0	-0.218648	1.37803
CPEB1	0	0	0	0	0	0	1	1	1	1	0	1.34289
CPEB1	1	0	0	0	0	0	1	1	1	1	0	1.30776
CPEB1	2	0	0	0	0	0	1	1	1	1	0	1.30776
CPEB1	3	0	0.0683957	0.297554	2.61552	0	0.0512	0	0.5248	0	-0.22986	1.30776
CPEB1	4	3	0.873321	1.06445	7.84655	0	0.0288	0.9712	0.5248	1	1.99792	1.30776
CPEB1	5	2	1.16037	1.22042	9.1543	0	0.2186	0.7814	0.6888	0.970997	0.687984	1.30776
CPEB1	6	4	3.52284	2.20151	14.3853	0	0.2842	0.7158	0.721118	0.970997	0.216743	1.30776
CPEB1	7	5	3.06891	2.09395	14.3853	0	0.2153	0.7847	0.6888	0.970997	0.922223	1.30776
CPEB1	8	1	2.88243	1.94265	14.3853	0	0.8929	0.1071	1	0.399191	-0.968999	1.30776
CPEB1	9	2	3.04577	2.02047	15.6931	0	0.6716	0.3284	1	0.859206	-0.517585	1.30776
CPEB1	10	1	3.05152	2.01016	15.6931	0	0.9018	0.0982	1	0.399191	-1.02058	1.30776
CPEB1	11	5	2.84725	1.9362	13.0776	0	0.1797	0.8203	0.6888	0.970997	1.11184	1.30776
CPEB1	12	2	3.13862	2.02725	14.3853	0	0.6911	0.3089	1	0.859206	-0.561656	1.30776
CPEB1	13	4	2.87524	1.9449	11.7698	0	0.1821	0.8179	0.6888	0.970997	0.578313	1.30776
CPEB1	14	5	2.79612	1.93444	11.7698	0	0.1711	0.8289	0.6888	0.970997	1.13929	1.30776
CPEB1	15	5	3.31909	2.09707	14.3853	0	0.252	0.748	0.6888	0.970997	0.801552	1.30776
CPEB1	16	1	3.77183	2.21064	14.3853	0	0.9428	0.0572	1	0.399191	-1.25386	1.30776
CPEB1	17	4	2.91983	1.95394	14.3853	0	0.1869	0.8131	0.6888	0.970997	0.552817	1.30776
CPEB1	18	4	3.1649	2.02506	15.6931	0	0.2259	0.7741	0.6888	0.970997	0.41238	1.30776
CPEB1	19	1	3.11416	2.05553	13.0776	0	0.9039	0.0961	1	0.399191	-1.02852	1.30776
CPEB1	20	2	2.99346	1.98793	13.0776	0	0.6647	0.3353	1	0.859206	-0.499746	1.30776
CREB3_XBP1	-20	39	37.8529	7.30128	68.914	12.9214	0.4038	0.5962	0.82779	0.989342	0.157114	1.43571
CREB3_XBP1	-19	39	37.356	7.3568	71.7854	12.9214	0.3739	0.6261	0.82779	0.989342	0.223471	1.43571
CREB3_XBP1	-18	39	36.0928	7.15199	63.1711	10.05	0.3092	0.6908	0.82779	0.989342	0.406484	1.43571
CREB3_XBP1	-17	35	36.7927	7.36359	67.4783	14.3571	0.573	0.427	0.93972	0.960263	-0.24346	1.43571
CREB3_XBP1	-16	38	39.4064	7.52182	68.914	15.7928	0.5634	0.4366	0.93972	0.960263	-0.186982	1.43571
CREB3_XBP1	-15	44	37.7222	7.40459	67.4783	8.61425	0.2037	0.7963	0.810433	0.989342	0.847823	1.43571
CREB3_XBP1	-14	26	38.5887	7.52558	74.6568	12.9214	0.949	0.051	1	0.298714	-1.67278	1.43571
CREB3_XBP1	-13	40	39.3994	7.49192	70.3497	15.7928	0.4814	0.5186	0.897155	0.989342	0.0801653	1.43571
CREB3_XBP1	-12	45	39.4509	7.4727	73.2211	14.3571	0.2143	0.7857	0.810433	0.989342	0.742577	1.43571
CREB3_XBP1	-11	37	39.3318	7.43072	70.3497	15.7928	0.6307	0.3693	0.956911	0.955556	-0.313804	1.43571
CREB3_XBP1	-10	44	39.2609	7.49684	70.3497	12.9214	0.2646	0.7354	0.82779	0.989342	0.632151	1.43571
CREB3_XBP1	-9	37	39.2276	7.47913	68.914	12.9214	0.6271	0.3729	0.956911	0.955556	-0.297836	1.43571
CREB3_XBP1	-8	53	41.1847	7.80187	73.2211	14.3571	0.0783	0.9217	0.401287	0.9986	1.51442	1.43571
CREB3_XBP1	-7	56	39.1937	7.48366	67.4783	10.05	0.0127	0.9873	0.10414	0.9986	2.24574	1.43571
CREB3_XBP1	-6	56	36.9334	7.36755	67.4783	14.3571	0.0054	0.9946	0.0997667	0.9986	2.58791	1.43571
CREB3_XBP1	-5	66	58.2988	9.18312	97.6281	27.2784	0.2199	0.7801	0.810433	0.989342	0.838628	1.43571
CREB3_XBP1	-4	21	29.08	6.49983	55.9926	7.17854	0.9029	0.0971	1	0.39811	-1.24311	1.43571
CREB3_XBP1	-3	11	10.6804	3.90492	27.2784	0	0.467	0.533	0.897155	0.989342	0.0818524	1.43571
CREB3_XBP1	-2	29	86.7676	11.324	130.649	47.3784	1	0	1	0	-5.10136	1.43571
CREB3_XBP1	-1	1	4.01969	2.39432	15.7928	0	0.9409	0.0591	1	0.302887	-1.26119	1.43571
CREB3_XBP1	0	6	18.538	5.09531	40.7635	4.21691	0.9977	0.0023	1	0.023575	-2.46069	1.42067
CREB3_XBP1	1	3	12.8207	4.17954	29.5184	0	0.9954	0.0046	1	0.03772	-2.34971	1.40564
CREB3_XBP1	2	2	2.59916	1.90022	12.6507	0	0.555	0.445	0.93972	0.960263	-0.315314	1.40564
CREB3_XBP1	3	16	60.6187	9.25471	96.989	26.7071	1	0	1	0	-4.82119	1.40564
CREB3_XBP1	4	21	45.3268	8.064	81.527	18.2733	0.9997	0.0003	1	0.0041	-3.01671	1.40564
CREB3_XBP1	5	25	36.1481	7.11926	64.6593	12.6507	0.954	0.046	1	0.298714	-1.5659	1.40564
CREB3_XBP1	6	32	35.55	7.14881	71.6875	9.83946	0.7001	0.2999	0.989797	0.945838	-0.496583	1.40564
CREB3_XBP1	7	56	36.8194	7.13089	70.2819	11.2451	0.0073	0.9927	0.0997667	0.9986	2.68979	1.40564
CREB3_XBP1	8	62	39.0632	7.3828	70.2819	12.6507	0.0014	0.9986	0.0574	0.9986	3.10678	1.40564
CREB3_XBP1	9	57	39.1173	7.47512	70.2819	14.0564	0.012	0.988	0.10414	0.9986	2.39229	1.40564
CREB3_XBP1	10	53	38.4345	7.37634	68.8762	12.6507	0.033	0.967	0.2255	0.9986	1.97463	1.40564
CREB3_XBP1	11	48	37.5286	7.24142	71.6875	12.6507	0.0697	0.9303	0.401287	0.9986	1.44605	1.40564
CREB3_XBP1	12	40	36.3097	7.12805	68.8762	14.0564	0.2886	0.7114	0.82779	0.989342	0.517711	1.40564
CREB3_XBP1	13	28	37.3288	7.22602	67.4706	14.0564	0.9185	0.0815	1	0.371278	-1.291	1.40564
CREB3_XBP1	14	32	38.6238	7.34548	68.8762	14.0564	0.8307	0.1693	1	0.631027	-0.901756	1.40564
CREB3_XBP1	15	29	35.0335	6.9896	64.6593	11.2451	0.8097	0.1903	1	0.650192	-0.863218	1.40564
CREB3_XBP1	16	39	36.3291	7.11138	68.8762	14.0564	0.3657	0.6343	0.82779	0.989342	0.375578	1.40564
CREB3_XBP1	17	40	35.0497	7.06313	64.6593	12.6507	0.2372	0.7628	0.810433	0.989342	0.700863	1.40564
CREB3_XBP1	18	39	37.0232	7.23219	70.2819	14.0564	0.4011	0.5989	0.82779	0.989342	0.273329	1.40564
CREB3_XBP1	19	38	36.2638	7.05975	71.6875	12.6507	0.3573	0.6427	0.82779	0.989342	0.245935	1.40564
CREB3_XBP1	20	31	34.501	6.93469	67.4706	12.6507	0.6535	0.3465	0.956911	0.955556	-0.504847	1.40564
CREB_ATF_1	-20	65	64.3384	10.1292	104.976	28.6297	0.4836	0.5164	1	0.882183	0.065313	1.59054
CREB_ATF_1	-19	67	59.9452	9.81035	100.204	27.0392	0.2097	0.7903	0.781609	1	0.719118	1.59054
CREB_ATF_1	-18	63	60.2749	9.7393	101.795	27.0392	0.3875	0.6125	1	0.930093	0.279802	1.59054
CREB_ATF_1	-17	69	60.5585	9.7852	109.747	25.4486	0.1856	0.8144	0.76096	1	0.862679	1.59054
CREB_ATF_1	-16	59	62.3608	9.90361	106.566	27.0392	0.5969	0.4031	1	0.826355	-0.339347	1.59054
CREB_ATF_1	-15	59	60.2248	9.80072	104.976	28.6297	0.5146	0.4854	1	0.882183	-0.124973	1.59054
CREB_ATF_1	-14	50	59.1433	9.67015	97.0229	28.6297	0.8249	0.1751	1	0.653391	-0.945513	1.59054
CREB_ATF_1	-13	58	63.683	10.1777	108.157	28.6297	0.7005	0.2995	1	0.740412	-0.558376	1.59054
CREB_ATF_1	-12	58	64.689	10.1821	104.976	27.0392	0.7373	0.2627	1	0.740412	-0.656938	1.59054
CREB_ATF_1	-11	66	63.5713	10.0205	104.976	30.2202	0.392	0.608	1	0.930093	0.242372	1.59054
CREB_ATF_1	-10	71	66.2022	10.4134	104.976	30.2202	0.3242	0.6758	0.949443	0.980993	0.46073	1.59054
CREB_ATF_1	-9	77	63.253	10.054	101.795	25.4486	0.0875	0.9125	0.448437	1	1.36731	1.59054
CREB_ATF_1	-8	115	66.4853	10.3544	114.519	31.8108	0	1	0	1	4.68541	1.59054
CREB_ATF_1	-7	177	72.8739	10.8531	117.7	34.9919	0	1	0	1	9.5941	1.59054
CREB_ATF_1	-6	98	66.2646	10.2612	109.747	30.2202	0.0016	0.9984	0.0109333	1	3.09277	1.59054
CREB_ATF_1	-5	74	95.2238	12.3762	147.92	41.354	0.9611	0.0389	1	0.31898	-1.7149	1.59054
CREB_ATF_1	-4	21	29.5099	6.89536	60.4405	7.9527	0.8837	0.1163	1	0.576278	-1.23415	1.59054
CREB_ATF_1	-3	1	1.08952	1.30583	7.9527	0	0.4982	0.5018	1	0.882183	-0.0685535	1.59054
CREB_ATF_1	-2	38	132.656	14.417	197.227	77.9364	1	0	1	0	-6.56558	1.59054
CREB_ATF_1	-1	1	1.16618	1.36684	11.1338	0	0.5209	0.4791	1	0.882183	-0.121582	1.59054
CREB_ATF_1	0	8	27.719	6.80699	62.2133	3.36288	0.9997	0.0003	1	0.0041	-2.89688	1.63599
CREB_ATF_1	1	11	29.2391	7.01317	65.5761	5.04432	0.9976	0.0024	1	0.0246	-2.60069	1.68144
CREB_ATF_1	2	2	3.57861	2.45436	15.133	0	0.6268	0.3732	1	0.805326	-0.643186	1.68144
CREB_ATF_1	3	35	124.933	14.4401	181.595	72.3019	1	0	1	0	-6.22801	1.68144
CREB_ATF_1	4	11	19.6633	5.80012	45.3989	1.68144	0.942	0.058	1	0.374271	-1.49363	1.68144
CREB_ATF_1	5	39	44.4346	8.62567	79.0276	16.8144	0.7075	0.2925	1	0.740412	-0.630044	1.68144
CREB_ATF_1	6	71	79.444	11.5535	131.152	40.3545	0.7509	0.2491	1	0.740412	-0.730859	1.68144
CREB_ATF_1	7	104	68.2286	10.6713	117.701	30.2659	0.0013	0.9987	0.01066	1	3.3521	1.68144
CREB_ATF_1	8	160	73.9995	11.275	127.789	38.6731	0	1	0	1	7.62756	1.68144
CREB_ATF_1	9	109	69.314	10.8076	121.064	33.6288	0.0005	0.9995	0.005125	1	3.67205	1.68144
CREB_ATF_1	10	99	68.5427	10.8504	110.975	30.2659	0.0039	0.9961	0.0228429	1	2.80702	1.68144
CREB_ATF_1	11	70	68.2012	10.6919	105.931	25.2216	0.4342	0.5658	1	0.927912	0.168241	1.68144
CREB_ATF_1	12	50	65.0436	10.4823	109.294	25.2216	0.9361	0.0639	1	0.374271	-1.43515	1.68144
CREB_ATF_1	13	56	66.2571	10.7238	109.294	28.5845	0.8247	0.1753	1	0.653391	-0.956477	1.68144
CREB_ATF_1	14	58	65.9856	10.6613	107.612	28.5845	0.7675	0.2325	1	0.740412	-0.749023	1.68144
CREB_ATF_1	15	50	61.1139	10.1813	105.931	26.903	0.8735	0.1265	1	0.576278	-1.0916	1.68144
CREB_ATF_1	16	59	64.0674	10.3934	110.975	30.2659	0.653	0.347	1	0.790389	-0.487555	1.68144
CREB_ATF_1	17	72	65.9893	10.6035	109.294	25.2216	0.2929	0.7071	0.923762	0.980993	0.566864	1.68144
CREB_ATF_1	18	75	63.9808	10.3733	102.568	25.2216	0.1485	0.8515	0.6765	1	1.06226	1.68144
CREB_ATF_1	19	68	62.2343	10.2906	99.2049	26.903	0.2822	0.7178	0.923762	0.980993	0.560293	1.68144
CREB_ATF_1	20	58	63.5796	10.448	105.931	30.2659	0.693	0.307	1	0.740412	-0.534035	1.68144
CREB_ATF_2	-20	28	28.7994	6.57142	57.1303	7.51715	0.5442	0.4558	0.847145	0.886283	-0.121646	1.50343
CREB_ATF_2	-19	21	28.3293	6.54121	60.1372	7.51715	0.895	0.105	1	0.5084	-1.12048	1.50343
CREB_ATF_2	-18	37	29.316	6.57398	55.6269	6.01372	0.1268	0.8732	0.577644	1	1.16886	1.50343
CREB_ATF_2	-17	30	28.2586	6.5254	55.6269	9.02058	0.4265	0.5735	0.847145	0.904365	0.266864	1.50343
CREB_ATF_2	-16	28	30.4886	6.77461	57.1303	4.51029	0.6382	0.3618	0.872207	0.886283	-0.367349	1.50343
CREB_ATF_2	-15	26	27.1522	6.37478	52.62	4.51029	0.5308	0.4692	0.847145	0.886283	-0.180748	1.50343
CREB_ATF_2	-14	26	26.7487	6.38344	57.1303	7.51715	0.5115	0.4885	0.847145	0.886283	-0.11729	1.50343
CREB_ATF_2	-13	40	28.6701	6.68465	60.1372	6.01372	0.0525	0.9475	0.35875	1	1.69491	1.50343
CREB_ATF_2	-12	24	31.5433	6.89021	61.6406	10.524	0.8884	0.1116	1	0.5084	-1.09479	1.50343
CREB_ATF_2	-11	27	29.3662	6.64024	61.6406	9.02058	0.6606	0.3394	0.873697	0.886283	-0.35634	1.50343
CREB_ATF_2	-10	31	29.3194	6.65069	60.1372	9.02058	0.3946	0.6054	0.847145	0.919311	0.252692	1.50343
CREB_ATF_2	-9	34	28.815	6.60861	57.1303	6.01372	0.2194	0.7806	0.774558	1	0.784579	1.50343
CREB_ATF_2	-8	57	31.815	7.00267	58.6337	9.02058	0.0007	0.9993	0.00902	1	3.59649	1.50343
CREB_ATF_2	-7	69	33.5423	7.10082	66.1509	10.524	0	1	0	1	4.99347	1.50343
CREB_ATF_2	-6	31	30.7245	6.76696	67.6543	9.02058	0.4812	0.5188	0.847145	0.886283	0.040708	1.50343
CREB_ATF_2	-5	29	41.1119	7.91205	70.6612	13.5309	0.939	0.061	1	0.416833	-1.53081	1.50343
CREB_ATF_2	-4	11	12.0374	4.21184	30.0686	0	0.5461	0.4539	0.847145	0.886283	-0.246295	1.50343
CREB_ATF_2	-3	1	1.03015	1.24337	9.02058	0	0.4969	0.5031	0.847145	0.886283	-0.0242483	1.50343
CREB_ATF_2	-2	28	64.847	9.73708	102.233	33.0754	1	0	1	0	-3.78419	1.50343
CREB_ATF_2	-1	0	0.277533	0.653502	4.51029	0	0.1665	0	0.68265	0	-0.424686	1.50343
CREB_ATF_2	0	6	18.3397	4.98164	38.7791	2.67442	0.9978	0.0022	1	0.02255	-2.47703	1.42032
CREB_ATF_2	1	5	13.8961	4.31733	30.7558	1.33721	0.9923	0.0077	1	0.06314	-2.06056	1.33721
CREB_ATF_2	2	5	4.10256	2.33651	14.7093	0	0.3696	0.6304	0.847145	0.923086	0.384095	1.33721
CREB_ATF_2	3	22	46.8896	7.88208	78.8953	17.3837	0.9998	0.0002	1	0.00273333	-3.15775	1.33721
CREB_ATF_2	4	2	2.63992	1.89296	12.0349	0	0.5874	0.4126	0.847145	0.886283	-0.338052	1.33721
CREB_ATF_2	5	11	12.1869	4.05302	29.4186	0	0.5592	0.4408	0.847145	0.886283	-0.292848	1.33721
CREB_ATF_2	6	36	36.8061	7.02646	64.186	13.3721	0.5629	0.4371	0.847145	0.886283	-0.114728	1.33721
CREB_ATF_2	7	41	21.6348	5.40703	46.8023	5.34883	0.0009	0.9991	0.00902	1	3.58148	1.33721
CREB_ATF_2	8	58	27.8725	6.08521	53.4883	6.68604	0	1	0	1	4.95094	1.33721
CREB_ATF_2	9	48	27.491	6.06973	53.4883	8.02325	0.0011	0.9989	0.00902	1	3.3789	1.33721
CREB_ATF_2	10	35	28.0304	6.10247	56.1628	6.68604	0.1154	0.8846	0.577644	1	1.14209	1.33721
CREB_ATF_2	11	37	27.2483	6.03686	52.1511	5.34883	0.0619	0.9381	0.362557	1	1.61536	1.33721
CREB_ATF_2	12	25	25.3283	5.77662	48.1395	8.02325	0.5293	0.4707	0.847145	0.886283	-0.056839	1.33721
CREB_ATF_2	13	26	27.7076	6.04022	52.1511	6.68604	0.5992	0.4008	0.847145	0.886283	-0.28271	1.33721
CREB_ATF_2	14	18	26.0424	5.87358	50.8139	8.02325	0.923	0.077	1	0.451	-1.36925	1.33721
CREB_ATF_2	15	20	24.4122	5.80632	46.8023	6.68604	0.8063	0.1937	1	0.721973	-0.759899	1.33721
CREB_ATF_2	16	19	24.4387	5.72529	49.4767	6.68604	0.8088	0.1912	1	0.721973	-0.949943	1.33721
CREB_ATF_2	17	26	25.2437	5.86831	52.1511	6.68604	0.4269	0.5731	0.847145	0.904365	0.12888	1.33721
CREB_ATF_2	18	27	25.1394	5.80973	49.4767	6.68604	0.3371	0.6629	0.847145	0.937203	0.320258	1.33721
CREB_ATF_2	19	30	25.7917	5.90054	49.4767	5.34883	0.2267	0.7733	0.774558	1	0.713209	1.33721
CREB_ATF_2	20	28	24.6421	5.73113	52.1511	6.68604	0.3045	0.6955	0.847145	0.950517	0.585909	1.33721
CREB_ATF_3	-20	15	11.4615	3.70215	28.4572	1.18572	0.1814	0.8186	0.631742	0.993285	0.955801	1.18572
CREB_ATF_3	-19	12	11.3702	3.6515	26.0857	0	0.3688	0.6312	0.755332	0.94751	0.172483	1.18572
CREB_ATF_3	-18	13	11.4893	3.68968	28.4572	0	0.3824	0.6176	0.755332	0.94751	0.409428	1.18572
CREB_ATF_3	-17	8	11.1355	3.64305	26.0857	0	0.8256	0.1744	0.944367	0.71504	-0.860687	1.18572
CREB_ATF_3	-16	17	10.7765	3.55332	24.9	1.18572	0.0427	0.9573	0.299983	1	1.75146	1.18572
CREB_ATF_3	-15	6	10.446	3.52771	27.2715	0	0.8697	0.1303	0.944367	0.642333	-1.26032	1.18572
CREB_ATF_3	-14	10	10.6884	3.59982	26.0857	1.18572	0.5469	0.4531	0.83063	0.94751	-0.19123	1.18572
CREB_ATF_3	-13	14	11.9017	3.79162	28.4572	1.18572	0.3121	0.6879	0.755332	0.94751	0.553395	1.18572
CREB_ATF_3	-12	6	10.9536	3.56639	27.2715	0	0.8983	0.1017	0.944367	0.642333	-1.38898	1.18572
CREB_ATF_3	-11	13	12.8248	3.93328	28.4572	1.18572	0.5169	0.4831	0.83063	0.94751	0.0445391	1.18572
CREB_ATF_3	-10	10	10.9469	3.63191	26.0857	0	0.5748	0.4252	0.841671	0.94751	-0.260711	1.18572
CREB_ATF_3	-9	9	11.751	3.74673	29.6429	1.18572	0.7717	0.2283	0.936247	0.780025	-0.734249	1.18572
CREB_ATF_3	-8	14	11.8875	3.78616	27.2715	0	0.3067	0.6933	0.755332	0.94751	0.557952	1.18572
CREB_ATF_3	-7	21	12.2213	3.77739	28.4572	1.18572	0.0178	0.9822	0.18245	1	2.32401	1.18572
CREB_ATF_3	-6	9	13.0937	3.95442	29.6429	1.18572	0.859	0.141	0.944367	0.642333	-1.03523	1.18572
CREB_ATF_3	-5	13	17.7328	4.57347	36.7572	3.55715	0.8785	0.1215	0.944367	0.642333	-1.03485	1.18572
CREB_ATF_3	-4	6	7.0703	2.90941	20.1572	0	0.547	0.453	0.83063	0.94751	-0.367876	1.18572
CREB_ATF_3	-3	0	0.119757	0.376843	3.55715	0	0.096	0	0.437333	0	-0.317791	1.18572
CREB_ATF_3	-2	24	27.0785	5.63187	50.9858	9.48572	0.6783	0.3217	0.916681	0.879313	-0.546627	1.18572
CREB_ATF_3	-1	0	0.553018	0.820219	5.92858	0	0.3699	0	0.755332	0	-0.674231	1.18572
CREB_ATF_3	0	1	2.92094	1.75794	10.8714	0	0.9341	0.0659	0.957453	0.54038	-1.09272	1.13643
CREB_ATF_3	1	32	9.37563	3.18866	23.9171	0	0	1	0	1	7.09526	1.08714
CREB_ATF_3	2	3	2.27398	1.57493	9.78428	0	0.3489	0.6511	0.755332	0.94751	0.460987	1.08714
CREB_ATF_3	3	2	3.10249	1.85374	13.0457	0	0.7764	0.2236	0.936247	0.780025	-0.594739	1.08714
CREB_ATF_3	4	0	0.0489214	0.231077	2.17429	0	0.0439	0	0.299983	0	-0.21171	1.08714
CREB_ATF_3	5	7	5.03619	2.32483	15.22	0	0.1849	0.8151	0.631742	0.993285	0.84471	1.08714
CREB_ATF_3	6	15	14.2359	3.94888	30.44	2.17429	0.4324	0.5676	0.7708	0.94751	0.193494	1.08714
CREB_ATF_3	7	14	9.24735	3.19639	26.0914	0	0.092	0.908	0.437333	1	1.48688	1.08714
CREB_ATF_3	8	23	12.1162	3.65405	27.1786	1.08714	0.0028	0.9972	0.0574	1	2.97856	1.08714
CREB_ATF_3	9	18	10.1511	3.33253	28.2657	1.08714	0.0154	0.9846	0.18245	1	2.35524	1.08714
CREB_ATF_3	10	11	10.7542	3.43798	28.2657	1.08714	0.4053	0.5947	0.755332	0.94751	0.0714857	1.08714
CREB_ATF_3	11	12	11.2881	3.51546	26.0914	1.08714	0.348	0.652	0.755332	0.94751	0.202497	1.08714
CREB_ATF_3	12	14	10.5086	3.37002	23.9171	0	0.1763	0.8237	0.631742	0.993285	1.036	1.08714
CREB_ATF_3	13	9	11.162	3.51235	26.0914	0	0.6931	0.3069	0.916681	0.879313	-0.615549	1.08714
CREB_ATF_3	14	10	10.2022	3.35974	23.9171	0	0.4618	0.5382	0.788908	0.94751	-0.0601779	1.08714
CREB_ATF_3	15	8	9.4801	3.24839	25.0043	0	0.6381	0.3619	0.902141	0.927369	-0.455641	1.08714
CREB_ATF_3	16	16	13.0461	3.85058	29.3529	1.08714	0.2353	0.7647	0.7421	0.993285	0.767118	1.08714
CREB_ATF_3	17	5	11.6906	3.62755	28.2657	1.08714	0.9805	0.0195	0.9805	0.199875	-1.84438	1.08714
CREB_ATF_3	18	17	11.4554	3.55392	28.2657	0	0.0692	0.9308	0.405314	1	1.56012	1.08714
CREB_ATF_3	19	10	9.64176	3.23417	25.0043	0	0.3963	0.6037	0.755332	0.94751	0.110767	1.08714
CREB_ATF_3	20	8	10.5206	3.35427	25.0043	0	0.7485	0.2515	0.936247	0.793192	-0.751461	1.08714
CUX_1	-20	1	0.957032	0.948219	5.69436	0	0.2695	0.7305	0.635272	0.979516	0.0453149	0.949059
CUX_1	-19	0	0.97905	0.972361	6.64342	0	0.6415	0	0.730597	0	-1.00688	0.949059
CUX_1	-18	1	0.962916	0.960422	5.69436	0	0.2703	0.7297	0.635272	0.979516	0.0386125	0.949059
CUX_1	-17	2	0.931787	0.958771	8.54153	0	0.0824	0.9176	0.4879	1	1.11415	0.949059
CUX_1	-16	1	0.87285	0.914228	5.69436	0	0.2355	0.7645	0.635272	0.979516	0.139079	0.949059
CUX_1	-15	1	1.17199	1.05634	6.64342	0	0.3539	0.6461	0.659541	0.979516	-0.162821	0.949059
CUX_1	-14	1	1.13005	1.03315	5.69436	0	0.3338	0.6662	0.651705	0.979516	-0.125873	0.949059
CUX_1	-13	0	0.804802	0.881646	6.64342	0	0.5687	0	0.730597	0	-0.912841	0.949059
CUX_1	-12	1	1.25551	1.1058	6.64342	0	0.3794	0.6206	0.676322	0.979516	-0.231065	0.949059
CUX_1	-11	1	0.919259	0.949208	5.69436	0	0.2565	0.7435	0.635272	0.979516	0.0850614	0.949059
CUX_1	-10	2	1.00999	0.970542	6.64342	0	0.0914	0.9086	0.4879	1	1.02006	0.949059
CUX_1	-9	1	0.983226	0.971203	6.64342	0	0.2789	0.7211	0.635272	0.979516	0.0172718	0.949059
CUX_1	-8	1	1.09417	1.01998	6.64342	0	0.3215	0.6785	0.651705	0.979516	-0.092326	0.949059
CUX_1	-7	1	1.04919	1.01451	7.59248	0	0.2972	0.7028	0.641326	0.979516	-0.0484817	0.949059
CUX_1	-6	3	0.783923	0.873655	6.64342	0	0.0112	0.9888	0.169467	1	2.53656	0.949059
CUX_1	-5	1	0.894868	0.935359	6.64342	0	0.2405	0.7595	0.635272	0.979516	0.112397	0.949059
CUX_1	-4	0	0.823214	0.87915	6.64342	0	0.584	0	0.730597	0	-0.936375	0.949059
CUX_1	-3	0	0.584526	0.743562	4.7453	0	0.4577	0	0.730597	0	-0.786116	0.949059
CUX_1	-2	0	0.00142359	0.0367312	0.949059	0	0.0015	0	0.0615	0	-0.038757	0.949059
CUX_1	-1	0	0.0117683	0.105031	0.949059	0	0.0124	0	0.169467	0	-0.112047	0.949059
CUX_1	0	2	4.04959	2.42767	15.9006	0	0.7707	0.2293	0.831545	0.671521	-0.844261	1.19728
CUX_1	1	0	1.26381	1.34221	11.5641	0	0.5862	0	0.730597	0	-0.941586	1.44551
CUX_1	2	0	0	0	0	0	1	1	1	1	0	1.44551
CUX_1	3	0	0	0	0	0	1	1	1	1	0	1.44551
CUX_1	4	0	2.44319	1.89576	11.5641	0	0.8158	0	0.857636	0	-1.28877	1.44551
CUX_1	5	1	1.31064	1.38579	10.1185	0	0.5948	0.4052	0.730597	0.96965	-0.224161	1.44551
CUX_1	6	0	0.916017	1.14787	8.67304	0	0.4715	0	0.730597	0	-0.798015	1.44551
CUX_1	7	2	1.45447	1.47814	10.1185	0	0.268	0.732	0.635272	0.979516	0.369065	1.44551
CUX_1	8	1	1.91226	1.66714	10.1185	0	0.7323	0.2677	0.811468	0.731713	-0.547199	1.44551
CUX_1	9	2	1.14224	1.26798	8.67304	0	0.1879	0.8121	0.635272	1	0.676477	1.44551
CUX_1	10	0	0.994219	1.19024	7.22753	0	0.4991	0	0.730597	0	-0.83531	1.44551
CUX_1	11	0	1.4841	1.4688	8.67304	0	0.641	0	0.730597	0	-1.01042	1.44551
CUX_1	12	0	1.48179	1.47794	10.1185	0	0.635	0	0.730597	0	-1.00261	1.44551
CUX_1	13	1	1.27335	1.38965	8.67304	0	0.5743	0.4257	0.730597	0.96965	-0.196702	1.44551
CUX_1	14	3	1.57922	1.49947	10.1185	0	0.0952	0.9048	0.4879	1	0.947527	1.44551
CUX_1	15	1	1.49581	1.48873	10.1185	0	0.6398	0.3602	0.730597	0.923013	-0.333043	1.44551
CUX_1	16	2	1.42671	1.45238	10.1185	0	0.2582	0.7418	0.635272	0.979516	0.394721	1.44551
CUX_1	17	3	1.19717	1.32827	8.67304	0	0.0553	0.9447	0.4879	1	1.35728	1.44551
CUX_1	18	2	1.41689	1.44703	8.67304	0	0.2545	0.7455	0.635272	0.979516	0.402974	1.44551
CUX_1	19	0	1.16436	1.29641	8.67304	0	0.5536	0	0.730597	0	-0.898138	1.44551
CUX_1	20	3	1.47948	1.46849	8.67304	0	0.0878	0.9122	0.4879	1	1.03543	1.44551
CUX_2	-20	2	1.76726	1.23509	6.95428	0	0.3323	0.6677	0.609008	0.9993	0.188442	0.869285
CUX_2	-19	2	1.9459	1.28126	7.82357	0	0.3828	0.6172	0.609008	0.9993	0.042228	0.869285
CUX_2	-18	2	1.902	1.29131	7.82357	0	0.3736	0.6264	0.609008	0.9993	0.0758946	0.869285
CUX_2	-17	2	1.8654	1.26361	6.95428	0	0.3678	0.6322	0.609008	0.9993	0.10652	0.869285
CUX_2	-16	2	1.5522	1.16101	6.95428	0	0.2668	0.7332	0.607711	0.9993	0.385701	0.869285
CUX_2	-15	2	1.90747	1.26467	7.82357	0	0.3739	0.6261	0.609008	0.9993	0.0731631	0.869285
CUX_2	-14	1	2.05699	1.34134	10.4314	0	0.6812	0.3188	0.856652	0.945636	-0.788011	0.869285
CUX_2	-13	2	1.9532	1.28993	7.82357	0	0.3862	0.6138	0.609008	0.9993	0.0362831	0.869285
CUX_2	-12	0	1.74796	1.23655	7.82357	0	0.8607	0	0.926074	0	-1.41357	0.869285
CUX_2	-11	0	1.73083	1.22487	6.95428	0	0.8612	0	0.926074	0	-1.41308	0.869285
CUX_2	-10	4	3.30807	1.70718	12.17	0	0.3344	0.6656	0.609008	0.9993	0.405309	0.869285
CUX_2	-9	1	3.52991	1.73905	12.17	0	0.9145	0.0855	0.937362	0.438188	-1.45476	0.869285
CUX_2	-8	0	0.0066935	0.075989	0.869285	0	0.0077	0	0.078925	0	-0.088085	0.869285
CUX_2	-7	1	0.79444	0.826314	5.21571	0	0.2335	0.7665	0.575688	0.9993	0.248768	0.869285
CUX_2	-6	7	5.25231	2.16816	14.7779	0	0.1571	0.8429	0.460079	0.9993	0.806072	0.869285
CUX_2	-5	6	4.34104	1.95271	13.0393	0	0.2387	0.7613	0.575688	0.9993	0.849567	0.869285
CUX_2	-4	0	0.00408564	0.059458	0.869285	0	0.0047	0	0.0642333	0	-0.0687148	0.869285
CUX_2	-3	0	0.0428558	0.193354	1.73857	0	0.048	0	0.1968	0	-0.221644	0.869285
CUX_2	-2	2	5.34836	2.16285	15.6471	0	0.9448	0.0552	0.9448	0.323314	-1.54813	0.869285
CUX_2	-1	6	2.63802	1.49941	10.4314	0	0.0353	0.9647	0.169011	0.9993	2.2422	0.869285
CUX_2	0	3	2.20053	1.26978	8.9949	0	0.1735	0.8265	0.474233	0.9993	0.629614	0.80943
CUX_2	1	1	2.51685	1.3686	8.9949	0	0.8484	0.1516	0.926074	0.62156	-1.10832	0.749575
CUX_2	2	1	2.74562	1.41557	8.9949	0	0.8809	0.1191	0.926074	0.542567	-1.23316	0.749575
CUX_2	3	2	1.56781	1.08277	6.74617	0	0.3471	0.6529	0.609008	0.9993	0.399151	0.749575
CUX_2	4	3	2.09476	1.24801	8.24532	0	0.1506	0.8494	0.460079	0.9993	0.725345	0.749575
CUX_2	5	6	1.82851	1.1713	8.24532	0	0.0007	0.9993	0.0287	0.9993	3.56142	0.749575
CUX_2	6	1	1.97303	1.21745	7.49575	0	0.738	0.262	0.889941	0.945636	-0.799236	0.749575
CUX_2	7	4	1.82746	1.16215	7.49575	0	0.0371	0.9629	0.169011	0.9993	1.8694	0.749575
CUX_2	8	2	1.76083	1.16584	7.49575	0	0.4114	0.5886	0.612314	0.9993	0.205151	0.749575
CUX_2	9	2	1.77987	1.15403	6.74617	0	0.4208	0.5792	0.612314	0.9993	0.190754	0.749575
CUX_2	10	6	2.04874	1.25533	8.24532	0	0.0019	0.9981	0.03895	0.9993	3.14759	0.749575
CUX_2	11	4	1.61406	1.10007	6.74617	0	0.0221	0.9779	0.15375	0.9993	2.16891	0.749575
CUX_2	12	4	1.68392	1.13212	7.49575	0	0.0282	0.9718	0.165171	0.9993	2.04579	0.749575
CUX_2	13	1	1.78774	1.15702	8.9949	0	0.6895	0.3105	0.856652	0.945636	-0.68083	0.749575
CUX_2	14	4	1.63527	1.10242	6.74617	0	0.0225	0.9775	0.15375	0.9993	2.14503	0.749575
CUX_2	15	2	1.81457	1.17106	8.24532	0	0.4331	0.5669	0.612314	0.9993	0.158343	0.749575
CUX_2	16	0	1.60566	1.10366	7.49575	0	0.8793	0	0.926074	0	-1.45485	0.749575
CUX_2	17	1	1.74419	1.13359	6.74617	0	0.6771	0.3229	0.856652	0.945636	-0.656488	0.749575
CUX_2	18	3	1.58887	1.08209	6.74617	0	0.061	0.939	0.227364	0.9993	1.30408	0.749575
CUX_2	19	3	1.6247	1.11565	7.49575	0	0.0719	0.9281	0.245658	0.9993	1.23273	0.749575
CUX_2	20	1	1.61968	1.09385	7.49575	0	0.6366	0.3634	0.856652	0.993293	-0.566512	0.749575
CUX_3	-20	0	0	0	0	0	1	1	1	1	0	0
CUX_3	-19	0	0	0	0	0	1	1	1	1	0	0
CUX_3	-18	0	0	0	0	0	1	1	1	1	0	0
CUX_3	-17	0	0	0	0	0	1	1	1	1	0	0
CUX_3	-16	0	0	0	0	0	1	1	1	1	0	0
CUX_3	-15	0	0	0	0	0	1	1	1	1	0	0
CUX_3	-14	0	0	0	0	0	1	1	1	1	0	0
CUX_3	-13	0	0	0	0	0	1	1	1	1	0	0
CUX_3	-12	0	0	0	0	0	1	1	1	1	0	0
CUX_3	-11	0	0	0	0	0	1	1	1	1	0	0
CUX_3	-10	0	0	0	0	0	1	1	1	1	0	0
CUX_3	-9	0	0	0	0	0	1	1	1	1	0	0
CUX_3	-8	0	0	0	0	0	1	1	1	1	0	0
CUX_3	-7	0	0	0	0	0	1	1	1	1	0	0
CUX_3	-6	1	0	0	0	0	1	1	1	1	0	0
CUX_3	-5	0	0	0	0	0	1	1	1	1	0	0
CUX_3	-4	0	0	0	0	0	1	1	1	1	0	0
CUX_3	-3	0	0	0	0	0	1	1	1	1	0	0
CUX_3	-2	0	0	0	0	0	1	1	1	1	0	0
CUX_3	-1	0	0	0	0	0	1	1	1	1	0	0
CUX_3	0	0	0.161235	0.365364	2.47926	0	0.177	0	0.4838	0	-0.441299	0.413211
CUX_3	1	0	0.131897	0.331748	2.47926	0	0.1467	0	0.4838	0	-0.397581	0.826421
CUX_3	2	0	0.245116	0.472913	3.30568	0	0.2442	0	0.524185	0	-0.518312	0.826421
CUX_3	3	0	0.0088427	0.0858308	1.65284	0	0.0106	0	0.12915	0	-0.103025	0.826421
CUX_3	4	0	0.0149582	0.111411	1.65284	0	0.0179	0	0.14678	0	-0.134261	0.826421
CUX_3	5	0	0.590147	0.714668	4.95853	0	0.5028	0	0.937036	0	-0.825764	0.826421
CUX_3	6	0	0.349328	0.538423	3.30568	0	0.345	0	0.673571	0	-0.648799	0.826421
CUX_3	7	0	0.0104129	0.0921839	0.826421	0	0.0126	0	0.12915	0	-0.112958	0.826421
CUX_3	8	0	0.000991705	0.0286123	0.826421	0	0.0012	0	0.0246	0	-0.0346601	0.826421
CUX_3	9	0	0.243794	0.447341	3.30568	0	0.2557	0	0.524185	0	-0.544986	0.826421
CUX_3	10	0	0.0785926	0.25454	2.47926	0	0.0908	0	0.449509	0	-0.308764	0.826421
CUX_3	11	1	0.220985	0.45874	4.95853	0	0.0415	0.9585	0.243071	1	1.69816	0.826421
CUX_3	12	0	0.204704	0.408698	4.13211	0	0.221	0	0.524185	0	-0.50087	0.826421
CUX_3	13	0	0.227927	0.45458	3.30568	0	0.2304	0	0.524185	0	-0.501401	0.826421
CUX_3	14	0	0.0999969	0.286485	2.47926	0	0.1146	0	0.449509	0	-0.349048	0.826421
CUX_3	15	0	0.1495	0.348856	2.47926	0	0.1665	0	0.4838	0	-0.428542	0.826421
CUX_3	16	0	0.0968565	0.282288	2.47926	0	0.1109	0	0.449509	0	-0.343113	0.826421
CUX_3	17	0	0.24115	0.443567	3.30568	0	0.2547	0	0.524185	0	-0.54366	0.826421
CUX_3	18	0	0.143715	0.345792	2.47926	0	0.1589	0	0.4838	0	-0.41561	0.826421
CUX_3	19	1	0.160491	0.394186	3.30568	0	0.0277	0.9723	0.189283	1	2.12973	0.826421
CUX_3	20	0	0.106608	0.298167	3.30568	0	0.1206	0	0.449509	0	-0.357545	0.826421
CUX_4	-20	1	1.1951	1.19351	8.45278	0	0.6302	0.3698	0.798724	0.706908	-0.16347	1.20754
CUX_4	-19	3	1.29666	1.25901	8.45278	0	0.098	0.902	0.50225	1	1.35292	1.20754
CUX_4	-18	3	1.22734	1.24806	9.66032	0	0.088	0.912	0.50225	1	1.42033	1.20754
CUX_4	-17	0	1.39447	1.30635	8.45278	0	0.6835	0	0.798724	0	-1.06745	1.20754
CUX_4	-16	0	1.65276	1.42362	10.8679	0	0.7449	0	0.803708	0	-1.16096	1.20754
CUX_4	-15	0	1.32214	1.26683	8.45278	0	0.6684	0	0.798724	0	-1.04366	1.20754
CUX_4	-14	1	1.09041	1.16067	8.45278	0	0.5862	0.4138	0.798724	0.706908	-0.077893	1.20754
CUX_4	-13	3	1.29967	1.25386	8.45278	0	0.0943	0.9057	0.50225	1	1.35607	1.20754
CUX_4	-12	2	1.20959	1.22242	7.24524	0	0.2678	0.7322	0.771569	0.971459	0.646592	1.20754
CUX_4	-11	0	0.967964	1.0716	7.24524	0	0.5541	0	0.798724	0	-0.903292	1.20754
CUX_4	-10	1	1.33747	1.27276	7.24524	0	0.6691	0.3309	0.798724	0.706908	-0.26515	1.20754
CUX_4	-9	1	1.54046	1.36041	8.45278	0	0.7208	0.2792	0.798724	0.706908	-0.397277	1.20754
CUX_4	-8	0	1.30982	1.27293	9.66032	0	0.6601	0	0.798724	0	-1.02898	1.20754
CUX_4	-7	3	0.92087	1.07635	7.24524	0	0.0465	0.9535	0.476625	1	1.93165	1.20754
CUX_4	-6	4	1.57451	1.38582	9.66032	0	0.0448	0.9552	0.476625	1	1.75022	1.20754
CUX_4	-5	0	1.07073	1.13467	7.24524	0	0.5896	0	0.798724	0	-0.943644	1.20754
CUX_4	-4	1	0.941519	1.05923	8.45278	0	0.5432	0.4568	0.798724	0.720338	0.0552112	1.20754
CUX_4	-3	0	0.0980522	0.34455	3.62262	0	0.0779	0	0.50225	0	-0.28458	1.20754
CUX_4	-2	0	0	0	0	0	1	1	1	1	0	1.20754
CUX_4	-1	1	3.35913	2.03802	12.0754	0	0.938	0.062	0.986103	0.195538	-1.15756	1.20754
CUX_4	0	0	0	0	0	0	1	1	1	1	0	1.36905
CUX_4	1	0	0.0711709	0.332319	4.59167	0	0.0452	0	0.476625	0	-0.214164	1.53056
CUX_4	2	0	0.0674976	0.326693	4.59167	0	0.0425	0	0.476625	0	-0.206608	1.53056
CUX_4	3	2	3.48691	2.31637	16.8361	0	0.6629	0.3371	0.798724	0.706908	-0.641915	1.53056
CUX_4	4	0	1.86238	1.69479	10.7139	0	0.7031	0	0.798724	0	-1.09889	1.53056
CUX_4	5	0	0.832164	1.12342	9.18334	0	0.4203	0	0.798724	0	-0.740744	1.53056
CUX_4	6	2	1.23286	1.40907	9.18334	0	0.1944	0.8056	0.771569	0.971459	0.544427	1.53056
CUX_4	7	1	1.81218	1.66968	10.7139	0	0.6938	0.3062	0.798724	0.706908	-0.486427	1.53056
CUX_4	8	1	1.21113	1.36454	9.18334	0	0.545	0.455	0.798724	0.720338	-0.154726	1.53056
CUX_4	9	0	1.06389	1.25823	9.18334	0	0.5043	0	0.798724	0	-0.845546	1.53056
CUX_4	10	1	1.74499	1.64546	10.7139	0	0.677	0.323	0.798724	0.706908	-0.452752	1.53056
CUX_4	11	2	1.36204	1.46428	9.18334	0	0.2235	0.7765	0.771569	0.971459	0.43568	1.53056
CUX_4	12	2	1.68652	1.64948	10.7139	0	0.3011	0.6989	0.771569	0.971459	0.190048	1.53056
CUX_4	13	1	1.40918	1.47943	9.18334	0	0.5984	0.4016	0.798724	0.706908	-0.276582	1.53056
CUX_4	14	2	1.66601	1.62569	12.2445	0	0.2983	0.7017	0.771569	0.971459	0.205444	1.53056
CUX_4	15	1	1.92116	1.72131	10.7139	0	0.7127	0.2873	0.798724	0.706908	-0.535146	1.53056
CUX_4	16	2	1.27648	1.38355	10.7139	0	0.2096	0.7904	0.771569	0.971459	0.522942	1.53056
CUX_4	17	1	1.56362	1.55879	9.18334	0	0.6339	0.3661	0.798724	0.706908	-0.361573	1.53056
CUX_4	18	1	1.40077	1.44773	9.18334	0	0.6035	0.3965	0.798724	0.706908	-0.276823	1.53056
CUX_4	19	2	1.49474	1.51668	10.7139	0	0.2552	0.7448	0.771569	0.971459	0.333134	1.53056
CUX_4	20	2	1.46658	1.51467	10.7139	0	0.2497	0.7503	0.771569	0.971459	0.352169	1.53056
DDIT3+CEBPA	-20	3	3.40595	1.832	11.893	0	0.4499	0.5501	0.662004	0.9978	-0.221587	0.991081
DDIT3+CEBPA	-19	7	3.79881	1.91724	13.8751	0	0.0422	0.9578	0.34604	0.9978	1.66968	0.991081
DDIT3+CEBPA	-18	5	3.82736	1.94229	13.8751	0	0.1919	0.8081	0.538467	0.9978	0.603744	0.991081
DDIT3+CEBPA	-17	2	3.84311	1.94442	13.8751	0	0.7431	0.2569	0.846308	0.919767	-0.947899	0.991081
DDIT3+CEBPA	-16	1	3.79059	1.95295	12.884	0	0.8917	0.1083	0.913992	0.555037	-1.42891	0.991081
DDIT3+CEBPA	-15	4	4.77076	2.18386	15.8573	0	0.525	0.475	0.694355	0.9978	-0.352937	0.991081
DDIT3+CEBPA	-14	5	3.83766	1.93051	12.884	0	0.197	0.803	0.538467	0.9978	0.602089	0.991081
DDIT3+CEBPA	-13	2	3.50922	1.87314	12.884	0	0.6881	0.3119	0.829768	0.983685	-0.805716	0.991081
DDIT3+CEBPA	-12	4	4.38365	2.09714	13.8751	0	0.4521	0.5479	0.662004	0.9978	-0.182939	0.991081
DDIT3+CEBPA	-11	5	3.76958	1.94905	13.8751	0	0.1885	0.8115	0.538467	0.9978	0.631295	0.991081
DDIT3+CEBPA	-10	5	4.05699	1.99573	13.8751	0	0.2248	0.7752	0.548194	0.9978	0.472514	0.991081
DDIT3+CEBPA	-9	5	4.07136	2.01761	14.8662	0	0.2273	0.7727	0.548194	0.9978	0.460268	0.991081
DDIT3+CEBPA	-8	7	4.23241	2.03699	14.8662	0	0.0677	0.9323	0.462617	0.9978	1.35867	0.991081
DDIT3+CEBPA	-7	4	4.76561	2.18679	16.8484	0	0.5229	0.4771	0.694355	0.9978	-0.350107	0.991081
DDIT3+CEBPA	-6	6	5.81863	2.40862	17.8395	0	0.3713	0.6287	0.634304	0.9978	0.0752985	0.991081
DDIT3+CEBPA	-5	0	1.7666	1.31742	9.91081	0	0.8299	0	0.872459	0	-1.34096	0.991081
DDIT3+CEBPA	-4	0	0.00535184	0.072636	0.991081	0	0.0054	0	0.1107	0	-0.0736802	0.991081
DDIT3+CEBPA	-3	2	0.661447	0.805916	4.9554	0	0.0292	0.9708	0.2993	0.9978	1.66091	0.991081
DDIT3+CEBPA	-2	0	0.396135	0.621763	3.96432	0	0.3311	0	0.634304	0	-0.637115	0.991081
DDIT3+CEBPA	-1	0	0.140733	0.377198	3.96432	0	0.131	0	0.538467	0	-0.373103	0.991081
DDIT3+CEBPA	0	0	0.14173	0.374838	2.92428	0	0.134	0	0.538467	0	-0.378111	0.982921
DDIT3+CEBPA	1	0	0.422949	0.647226	4.87381	0	0.3496	0	0.634304	0	-0.65348	0.974761
DDIT3+CEBPA	2	8	13.068	3.58874	30.2176	0.974761	0.9201	0.0799	0.9201	0.467986	-1.41221	0.974761
DDIT3+CEBPA	3	6	7.20134	2.66464	20.47	0	0.6051	0.3949	0.751791	0.9978	-0.450845	0.974761
DDIT3+CEBPA	4	6	6.15211	2.45776	17.5457	0	0.4481	0.5519	0.662004	0.9978	-0.0618888	0.974761
DDIT3+CEBPA	5	3	3.09535	1.73426	11.6971	0	0.3881	0.6119	0.636484	0.9978	-0.0549828	0.974761
DDIT3+CEBPA	6	4	3.48516	1.84337	12.6719	0	0.2922	0.7078	0.59901	0.9978	0.279291	0.974761
DDIT3+CEBPA	7	11	4.3488	2.05385	14.6214	0	0.0022	0.9978	0.0902	0.9978	3.23841	0.974761
DDIT3+CEBPA	8	8	3.46138	1.8588	11.6971	0	0.0132	0.9868	0.1804	0.9978	2.4417	0.974761
DDIT3+CEBPA	9	5	3.63372	1.85959	11.6971	0	0.1693	0.8307	0.538467	0.9978	0.734723	0.974761
DDIT3+CEBPA	10	3	3.96591	1.9702	13.6467	0	0.577	0.423	0.739281	0.9978	-0.490262	0.974761
DDIT3+CEBPA	11	4	3.86512	1.94097	12.6719	0	0.3672	0.6328	0.634304	0.9978	0.0694893	0.974761
DDIT3+CEBPA	12	2	3.98902	1.97133	13.6467	0	0.7711	0.2289	0.854462	0.919767	-1.00897	0.974761
DDIT3+CEBPA	13	5	4.21682	2.01197	12.6719	0	0.2675	0.7325	0.5945	0.9978	0.389262	0.974761
DDIT3+CEBPA	14	6	3.61997	1.87583	12.6719	0	0.0827	0.9173	0.484386	0.9978	1.26879	0.974761
DDIT3+CEBPA	15	5	4.25795	2.04246	14.6214	0	0.2755	0.7245	0.5945	0.9978	0.363311	0.974761
DDIT3+CEBPA	16	1	3.04369	1.71436	10.7224	0	0.8202	0.1798	0.872459	0.819089	-1.1921	0.974761
DDIT3+CEBPA	17	3	3.58732	1.87309	13.6467	0	0.5006	0.4994	0.694355	0.9978	-0.313555	0.974761
DDIT3+CEBPA	18	5	3.61276	1.86839	11.6971	0	0.167	0.833	0.538467	0.9978	0.742479	0.974761
DDIT3+CEBPA	19	2	3.70195	1.88693	13.6467	0	0.7308	0.2692	0.846308	0.919767	-0.901965	0.974761
DDIT3+CEBPA	20	6	4.13357	1.98807	13.6467	0	0.1351	0.8649	0.538467	0.9978	0.938816	0.974761
DMRT1	-20	2	4.89756	2.31862	17.1464	0	0.9378	0.0622	0.9801	0.486875	-1.24969	1.07165
DMRT1	-19	5	4.98993	2.35921	17.1464	0	0.4905	0.5095	0.908239	0.940504	0.00426717	1.07165
DMRT1	-18	5	5.52801	2.40905	16.0748	0	0.5914	0.4086	0.9801	0.881716	-0.219177	1.07165
DMRT1	-17	4	5.18915	2.39139	19.2897	0	0.709	0.291	0.9801	0.747994	-0.497264	1.07165
DMRT1	-16	6	4.91427	2.27763	18.2181	0	0.3096	0.6904	0.79335	0.958888	0.47669	1.07165
DMRT1	-15	9	5.33243	2.37337	17.1464	0	0.0645	0.9355	0.583908	0.958888	1.5453	1.07165
DMRT1	-14	8	5.69937	2.48958	18.2181	0	0.1682	0.8318	0.583908	0.958888	0.924103	1.07165
DMRT1	-13	7	5.73966	2.46637	16.0748	0	0.2851	0.7149	0.779273	0.958888	0.511009	1.07165
DMRT1	-12	2	5.70387	2.51234	17.1464	0	0.9671	0.0329	0.9801	0.337225	-1.47427	1.07165
DMRT1	-11	4	5.41131	2.4619	17.1464	0	0.7305	0.2695	0.9801	0.747994	-0.573258	1.07165
DMRT1	-10	6	5.92398	2.53875	18.2181	0	0.4724	0.5276	0.908239	0.940504	0.029942	1.07165
DMRT1	-9	4	5.01865	2.33879	15.0031	0	0.6863	0.3137	0.9801	0.756571	-0.435547	1.07165
DMRT1	-8	2	4.4136	2.2045	15.0031	0	0.914	0.086	0.9801	0.486875	-1.09485	1.07165
DMRT1	-7	9	5.58802	2.45793	18.2181	0	0.0823	0.9177	0.583908	0.958888	1.38815	1.07165
DMRT1	-6	12	10.4306	3.378	27.863	0	0.2743	0.7257	0.779273	0.958888	0.464594	1.07165
DMRT1	-5	4	3.13201	1.84321	12.8598	0	0.333	0.667	0.803118	0.958888	0.470912	1.07165
DMRT1	-4	1	4.18791	2.11797	13.9315	0	0.9801	0.0199	0.9801	0.3075	-1.50517	1.07165
DMRT1	-3	0	0.660888	0.846702	5.35826	0	0.4604	0	0.908239	0	-0.780543	1.07165
DMRT1	-2	5	2.33845	1.56833	10.7165	0	0.0724	0.9276	0.583908	0.958888	1.69705	1.07165
DMRT1	-1	4	0.880041	0.968356	6.42991	0	0.0086	0.9914	0.3526	0.9914	3.22191	1.07165
DMRT1	0	4	2.01511	1.63007	11.4408	0	0.0786	0.9214	0.583908	0.958888	1.21768	1.17143
DMRT1	1	2	0.871407	1.06148	7.6272	0	0.1524	0.8476	0.583908	0.958888	1.06323	1.2712
DMRT1	2	4	3.33525	2.07457	12.712	0	0.2693	0.7307	0.779273	0.958888	0.320429	1.2712
DMRT1	3	2	3.34402	2.05424	12.712	0	0.7398	0.2602	0.9801	0.747994	-0.654266	1.2712
DMRT1	4	1	4.71564	2.4429	17.7968	0	0.9775	0.0225	0.9801	0.3075	-1.521	1.2712
DMRT1	5	6	3.59114	2.13571	15.2544	0	0.1571	0.8429	0.583908	0.958888	1.1279	1.2712
DMRT1	6	5	9.13217	3.41511	26.6952	0	0.9222	0.0778	0.9801	0.486875	-1.20997	1.2712
DMRT1	7	6	6.00578	2.77549	17.7968	0	0.5095	0.4905	0.908239	0.940504	-0.00208335	1.2712
DMRT1	8	4	5.69752	2.68723	17.7968	0	0.654	0.346	0.9801	0.788111	-0.631697	1.2712
DMRT1	9	2	5.02251	2.55274	16.5256	0	0.905	0.095	0.9801	0.486875	-1.18403	1.2712
DMRT1	10	7	6.23739	2.79614	20.3392	0	0.3658	0.6342	0.833211	0.958888	0.272735	1.2712
DMRT1	11	4	6.09184	2.78926	21.6104	0	0.7081	0.2919	0.9801	0.747994	-0.749963	1.2712
DMRT1	12	10	6.78706	2.92211	21.6104	0	0.1709	0.8291	0.583908	0.958888	1.09953	1.2712
DMRT1	13	4	6.61214	2.86694	19.068	0	0.7619	0.2381	0.9801	0.747994	-0.911125	1.2712
DMRT1	14	3	5.62938	2.65249	16.5256	0	0.8199	0.1801	0.9801	0.671282	-0.991288	1.2712
DMRT1	15	9	6.19964	2.81086	22.8816	0	0.1217	0.8783	0.583908	0.958888	0.996263	1.2712
DMRT1	16	3	5.98888	2.74481	20.3392	0	0.8475	0.1525	0.9801	0.671282	-1.08892	1.2712
DMRT1	17	9	6.58151	2.86261	19.068	0	0.1478	0.8522	0.583908	0.958888	0.844856	1.2712
DMRT1	18	8	5.67641	2.6982	19.068	0	0.1663	0.8337	0.583908	0.958888	0.861163	1.2712
DMRT1	19	3	5.70349	2.70095	19.068	0	0.8212	0.1788	0.9801	0.671282	-1.00094	1.2712
DMRT1	20	6	5.81498	2.73888	20.3392	0	0.4803	0.5197	0.908239	0.940504	0.067555	1.2712
DMRT3	-20	0	0.38755	0.451166	2.68275	0	0.5195	0	0.80852	0	-0.858997	0.53655
DMRT3	-19	1	0.493519	0.515105	3.75585	0	0.2381	0.7619	0.80852	0.869086	0.983257	0.53655
DMRT3	-18	0	0.453117	0.499426	5.3655	0	0.5696	0	0.80852	0	-0.907275	0.53655
DMRT3	-17	0	0.452258	0.490321	3.2193	0	0.5708	0	0.80852	0	-0.922372	0.53655
DMRT3	-16	0	0.6026	0.564796	3.75585	0	0.6731	0	0.80852	0	-1.06693	0.53655
DMRT3	-15	1	0.541862	0.541013	3.2193	0	0.2701	0.7299	0.80852	0.869086	0.846814	0.53655
DMRT3	-14	0	0.43085	0.486185	3.2193	0	0.5477	0	0.80852	0	-0.886185	0.53655
DMRT3	-13	1	0.511816	0.521882	3.2193	0	0.2483	0.7517	0.80852	0.869086	0.935431	0.53655
DMRT3	-12	1	0.519595	0.528032	3.2193	0	0.2531	0.7469	0.80852	0.869086	0.909802	0.53655
DMRT3	-11	0	0.490514	0.513726	3.75585	0	0.6008	0	0.80852	0	-0.954818	0.53655
DMRT3	-10	1	0.576899	0.560805	3.75585	0	0.2951	0.7049	0.80852	0.869086	0.754452	0.53655
DMRT3	-9	1	0.536229	0.526448	4.2924	0	0.2682	0.7318	0.80852	0.869086	0.880945	0.53655
DMRT3	-8	0	0.578455	0.556904	3.75585	0	0.6601	0	0.80852	0	-1.0387	0.53655
DMRT3	-7	1	0.589454	0.561814	3.75585	0	0.3027	0.6973	0.80852	0.869086	0.73075	0.53655
DMRT3	-6	0	1.06596	0.744881	4.82895	0	0.8686	0	0.937174	0	-1.43105	0.53655
DMRT3	-5	1	0.711573	0.618903	4.2924	0	0.3787	0.6213	0.80852	0.869086	0.466029	0.53655
DMRT3	-4	1	0.0617033	0.181467	1.60965	0	0.0057	0.9943	0.2337	1	5.17062	0.53655
DMRT3	-3	0	0	0	0	0	1	1	1	1	0	0.53655
DMRT3	-2	0	0.053977	0.170256	1.60965	0	0.0958	0	0.80852	0	-0.317034	0.53655
DMRT3	-1	0	0	0	0	0	1	1	1	1	0	0.53655
DMRT3	0	0	0	0	0	0	1	1	1	1	0	0.941323
DMRT3	1	0	0.0951689	0.356927	4.03828	0	0.0685	0	0.80852	0	-0.266634	1.34609
DMRT3	2	4	5.23335	2.65362	21.5375	0	0.7471	0.2529	0.827868	0.609935	-0.46478	1.34609
DMRT3	3	0	0.69122	0.971867	6.73047	0	0.3988	0	0.80852	0	-0.711228	1.34609
DMRT3	4	0	0.495901	0.816047	6.73047	0	0.308	0	0.80852	0	-0.607687	1.34609
DMRT3	5	0	1.81844	1.58148	10.7688	0	0.7365	0	0.827868	0	-1.14983	1.34609
DMRT3	6	0	1.22495	1.28944	9.42266	0	0.5958	0	0.80852	0	-0.949985	1.34609
DMRT3	7	1	1.2057	1.29359	8.07657	0	0.5862	0.4138	0.80852	0.685684	-0.159012	1.34609
DMRT3	8	1	1.43238	1.37031	8.07657	0	0.6598	0.3402	0.80852	0.684114	-0.315535	1.34609
DMRT3	9	0	1.09505	1.21208	8.07657	0	0.5611	0	0.80852	0	-0.903444	1.34609
DMRT3	10	1	1.48542	1.42845	10.7688	0	0.6668	0.3332	0.80852	0.684114	-0.339821	1.34609
DMRT3	11	2	1.30396	1.32111	9.42266	0	0.2516	0.7484	0.80852	0.869086	0.52686	1.34609
DMRT3	12	0	1.39375	1.37028	9.42266	0	0.6455	0	0.80852	0	-1.01713	1.34609
DMRT3	13	1	1.29535	1.31971	8.07657	0	0.6188	0.3812	0.80852	0.685684	-0.223798	1.34609
DMRT3	14	1	1.15885	1.24063	8.07657	0	0.5819	0.4181	0.80852	0.685684	-0.128043	1.34609
DMRT3	15	2	1.2477	1.2913	10.7688	0	0.2369	0.7631	0.80852	0.869086	0.582593	1.34609
DMRT3	16	1	1.23787	1.29745	8.07657	0	0.6	0.4	0.80852	0.685684	-0.183336	1.34609
DMRT3	17	2	1.32631	1.31668	9.42266	0	0.2634	0.7366	0.80852	0.869086	0.511658	1.34609
DMRT3	18	4	1.45015	1.40448	8.07657	0	0.0963	0.9037	0.80852	1	1.81551	1.34609
DMRT3	19	1	1.42161	1.38187	8.07657	0	0.6496	0.3504	0.80852	0.684114	-0.305102	1.34609
DMRT3	20	1	1.57655	1.46397	8.07657	0	0.6902	0.3098	0.80852	0.684114	-0.393823	1.34609
E2F_1	-20	17	14.7418	4.20856	30.1673	1.20669	0.2473	0.7527	0.567622	0.997988	0.536574	1.20669
E2F_1	-19	18	14.2098	4.15602	37.4075	2.41338	0.2077	0.7923	0.567622	0.997988	0.911987	1.20669
E2F_1	-18	21	15.4098	4.3735	37.4075	0	0.0992	0.9008	0.567622	1	1.27819	1.20669
E2F_1	-17	17	14.2036	4.15395	34.9941	2.41338	0.2092	0.7908	0.567622	0.997988	0.673188	1.20669
E2F_1	-16	9	13.9975	4.13542	33.7874	1.20669	0.887	0.113	0.985025	0.661857	-1.20847	1.20669
E2F_1	-15	11	13.4608	4.05577	30.1673	1.20669	0.6766	0.3234	0.964465	0.88396	-0.606733	1.20669
E2F_1	-14	19	14.1508	4.16987	33.7874	1.20669	0.137	0.863	0.567622	1	1.16292	1.20669
E2F_1	-13	13	15.5237	4.35612	33.7874	2.41338	0.7332	0.2668	0.964465	0.88396	-0.579352	1.20669
E2F_1	-12	4	13.2962	4.0405	33.7874	1.20669	0.9947	0.0053	0.9947	0.2173	-2.30075	1.20669
E2F_1	-11	11	16.8731	4.50764	36.2008	2.41338	0.8912	0.1088	0.985025	0.661857	-1.30291	1.20669
E2F_1	-10	15	15.8611	4.42065	33.7874	2.41338	0.5493	0.4507	0.903148	0.997988	-0.194795	1.20669
E2F_1	-9	17	14.0758	4.16357	32.5807	1.20669	0.2009	0.7991	0.567622	0.997988	0.702326	1.20669
E2F_1	-8	16	14.5669	4.22002	33.7874	1.20669	0.33	0.67	0.615	0.997988	0.339585	1.20669
E2F_1	-7	27	14.6471	4.24816	31.374	2.41338	0.0039	0.9961	0.0533	1	2.90783	1.20669
E2F_1	-6	14	11.8203	3.72834	27.7539	1.20669	0.2785	0.7215	0.600974	0.997988	0.584637	1.20669
E2F_1	-5	17	15.3009	4.25195	32.5807	1.20669	0.296	0.704	0.6068	0.997988	0.399616	1.20669
E2F_1	-4	12	12.0425	3.89185	28.9606	1.20669	0.5368	0.4632	0.903148	0.997988	-0.0109319	1.20669
E2F_1	-3	10	13.8183	4.19336	33.7874	0	0.7998	0.2002	0.964465	0.848327	-0.910561	1.20669
E2F_1	-2	53	30.4378	6.10198	54.3011	10.8602	0.0003	0.9997	0.00615	1	3.69751	1.20669
E2F_1	-1	37	13.5205	4.07728	30.1673	1.20669	0	1	0	1	5.75862	1.20669
E2F_1	0	2	2.60842	1.75159	11.8129	0	0.6453	0.3547	0.964465	0.908919	-0.34735	1.19399
E2F_1	1	2	3.37472	2.00506	12.9942	0	0.7724	0.2276	0.964465	0.848327	-0.685624	1.18129
E2F_1	2	21	10.8848	3.63277	27.1698	0	0.0078	0.9922	0.07995	1	2.78444	1.18129
E2F_1	3	19	29.6706	6.0591	54.3395	10.6316	0.961	0.039	0.985025	0.661857	-1.76108	1.18129
E2F_1	4	9	10.6712	3.53996	29.5323	0	0.682	0.318	0.964465	0.88396	-0.472101	1.18129
E2F_1	5	6	8.1892	3.167	23.6259	0	0.6859	0.3141	0.964465	0.88396	-0.691254	1.18129
E2F_1	6	11	8.9646	3.25383	22.4446	0	0.2357	0.7643	0.567622	0.997988	0.625538	1.18129
E2F_1	7	13	11.3014	3.69072	29.5323	0	0.2492	0.7508	0.567622	0.997988	0.460224	1.18129
E2F_1	8	20	15.5383	4.29844	36.6201	2.36259	0.1774	0.8226	0.567622	0.997988	1.03799	1.18129
E2F_1	9	24	15.7986	4.34984	34.2575	1.18129	0.0347	0.9653	0.28454	1	1.88544	1.18129
E2F_1	10	14	14.2942	4.07332	30.7136	2.36259	0.5507	0.4493	0.903148	0.997988	-0.0722376	1.18129
E2F_1	11	8	13.5217	4.03174	33.0762	1.18129	0.9348	0.0652	0.985025	0.661857	-1.36955	1.18129
E2F_1	12	11	14.5698	4.17046	33.0762	1.18129	0.7852	0.2148	0.964465	0.848327	-0.855984	1.18129
E2F_1	13	18	14.5105	4.1511	34.2575	2.36259	0.1762	0.8238	0.567622	0.997988	0.84061	1.18129
E2F_1	14	18	15.0155	4.25468	33.0762	2.36259	0.2137	0.7863	0.567622	0.997988	0.701452	1.18129
E2F_1	15	17	14.1782	4.13485	33.0762	2.36259	0.228	0.772	0.567622	0.997988	0.682432	1.18129
E2F_1	16	8	12.706	3.84691	30.7136	1.18129	0.913	0.087	0.985025	0.661857	-1.22332	1.18129
E2F_1	17	11	14.6874	4.16995	33.0762	2.36259	0.7954	0.2046	0.964465	0.848327	-0.884275	1.18129
E2F_1	18	18	14.4893	4.11	33.0762	1.18129	0.1724	0.8276	0.567622	0.997988	0.854191	1.18129
E2F_1	19	8	14.2084	4.14179	35.4388	1.18129	0.9514	0.0486	0.985025	0.661857	-1.49896	1.18129
E2F_1	20	16	14.1996	4.11938	31.8949	1.18129	0.3215	0.6785	0.615	0.997988	0.43705	1.18129
E2F_2	-20	285	322.961	19.6649	395.716	252.358	0.9757	0.0243	1	0.09963	-1.93038	1.18478
E2F_2	-19	278	324.189	19.6327	399.27	254.727	0.9926	0.0074	1	0.0341667	-2.35264	1.18478
E2F_2	-18	300	324.486	19.6955	415.857	263.021	0.8896	0.1104	1	0.2829	-1.24325	1.18478
E2F_2	-17	289	323.114	19.6176	393.346	252.358	0.9612	0.0388	1	0.132567	-1.73896	1.18478
E2F_2	-16	303	333.863	19.8233	411.118	254.727	0.9449	0.0551	1	0.173777	-1.55689	1.18478
E2F_2	-15	275	331.938	19.6671	405.194	258.281	0.9982	0.0018	1	0.0123	-2.89509	1.18478
E2F_2	-14	303	338.373	19.9277	409.933	260.651	0.9646	0.0354	1	0.131945	-1.77507	1.18478
E2F_2	-13	305	334.893	19.7484	405.194	251.173	0.9365	0.0635	1	0.185964	-1.5137	1.18478
E2F_2	-12	330	342.277	20.2152	430.074	270.129	0.7278	0.2722	1	0.620011	-0.60732	1.18478
E2F_2	-11	396	345.246	20.1536	432.444	272.499	0.0072	0.9928	0.0227077	1	2.51837	1.18478
E2F_2	-10	483	351.844	20.1812	427.705	271.314	0	1	0	1	6.49892	1.18478
E2F_2	-9	502	375.812	21.1887	464.433	300.933	0	1	0	1	5.95546	1.18478
E2F_2	-8	431	385.332	21.0922	476.28	315.151	0.0166	0.9834	0.0486143	1	2.16514	1.18478
E2F_2	-7	289	342.369	20.1021	425.335	270.129	0.9955	0.0045	1	0.0263571	-2.65492	1.18478
E2F_2	-6	372	390.351	21.356	471.541	312.781	0.8121	0.1879	1	0.453171	-0.859272	1.18478
E2F_2	-5	695	495.533	24.2212	584.095	404.009	0	1	0	1	8.23524	1.18478
E2F_2	-4	747	521.377	24.4384	625.562	432.444	0	1	0	1	9.23232	1.18478
E2F_2	-3	485	658.463	27.1996	762.997	560.4	1	0	1	0	-6.37742	1.18478
E2F_2	-2	231	415.296	21.878	499.976	340.031	1	0	1	0	-8.42381	1.18478
E2F_2	-1	21	47.1438	7.22336	74.641	24.8803	1	0	1	0	-3.61935	1.18478
E2F_2	0	223	369.854	18.565	440.758	300.422	1	0	1	0	-7.9103	1.11215
E2F_2	1	641	745.766	27.3359	854.488	647.623	1	0	1	0	-3.83254	1.03952
E2F_2	2	1068	964.151	30.8783	1087.34	838.896	0.0003	0.9997	0.00123	1	3.36318	1.03952
E2F_2	3	379	322.824	18.1271	390.861	259.881	0.0007	0.9993	0.00239167	1	3.09901	1.03952
E2F_2	4	307	235.899	15.4427	305.62	181.917	0	1	0	1	4.60421	1.03952
E2F_2	5	431	336.826	18.8407	408.533	265.079	0	1	0	1	4.99844	1.03952
E2F_2	6	363	339.418	18.7082	410.612	270.276	0.1023	0.8977	0.27962	1	1.2605	1.03952
E2F_2	7	503	356.487	19.0067	443.877	285.869	0	1	0	1	7.70851	1.03952
E2F_2	8	459	322.022	18.506	396.059	249.486	0	1	0	1	7.4018	1.03952
E2F_2	9	358	292.082	17.4502	366.952	228.695	0.0001	0.9999	0.000455556	1	3.77749	1.03952
E2F_2	10	361	300.23	17.8091	380.466	240.13	0.0007	0.9993	0.00239167	1	3.41233	1.03952
E2F_2	11	304	299.941	17.7826	379.426	240.13	0.4075	0.5925	0.928194	1	0.228249	1.03952
E2F_2	12	311	304.899	17.7818	372.149	238.051	0.3523	0.6477	0.902769	1	0.343095	1.03952
E2F_2	13	305	304.408	17.7723	367.991	247.407	0.4796	0.5204	0.98318	0.969836	0.0333003	1.03952
E2F_2	14	293	290.532	17.0911	355.517	228.695	0.4477	0.5523	0.966089	0.984535	0.144415	1.03952
E2F_2	15	281	284.418	17.1328	353.438	223.498	0.5714	0.4286	1	0.87779	-0.199521	1.03952
E2F_2	16	276	284.137	17.2426	355.517	222.458	0.6776	0.3224	1	0.695705	-0.47194	1.03952
E2F_2	17	295	289.832	17.3095	360.715	232.853	0.387	0.613	0.928194	1	0.298536	1.03952
E2F_2	18	281	283.659	17.2274	344.082	217.26	0.5504	0.4496	1	0.87779	-0.154334	1.03952
E2F_2	19	251	275.125	17.1091	338.885	199.589	0.9221	0.0779	1	0.212927	-1.41005	1.03952
E2F_2	20	235	275.812	16.923	347.201	207.905	0.9925	0.0075	1	0.0341667	-2.41162	1.03952
E2F_3	-20	3	4.57098	1.96053	13.7841	0	0.7765	0.2235	0.9998	0.704885	-0.801304	0.861506
E2F_3	-19	8	4.86889	2.07903	16.3686	0	0.0655	0.9345	0.334378	1	1.50604	0.861506
E2F_3	-18	6	4.78825	2.01971	13.7841	0	0.3241	0.6759	0.89626	0.989711	0.599962	0.861506
E2F_3	-17	3	5.12243	2.11793	15.5071	0	0.8381	0.1619	0.9998	0.648545	-1.00212	0.861506
E2F_3	-16	5	5.10813	2.10735	16.3686	0	0.5416	0.4584	0.89626	0.906756	-0.0513101	0.861506
E2F_3	-15	5	4.96443	2.05726	13.7841	0	0.5198	0.4802	0.89626	0.906756	0.0172905	0.861506
E2F_3	-14	7	4.80962	2.03613	16.3686	0	0.1132	0.8868	0.46412	1	1.07576	0.861506
E2F_3	-13	2	4.76551	2.01311	13.7841	0	0.9131	0.0869	0.9998	0.508986	-1.37375	0.861506
E2F_3	-12	5	5.06772	2.10062	16.3686	0	0.5362	0.4638	0.89626	0.906756	-0.0322397	0.861506
E2F_3	-11	5	4.92885	2.06025	15.5071	0	0.5047	0.4953	0.89626	0.906756	0.0345353	0.861506
E2F_3	-10	8	4.69392	2.0201	14.6456	0	0.0514	0.9486	0.301057	1	1.6366	0.861506
E2F_3	-9	10	5.02568	2.1011	13.7841	0	0.019	0.981	0.19475	1	2.36748	0.861506
E2F_3	-8	14	5.6563	2.21502	14.6456	0	0.0003	0.9997	0.00615	1	3.76687	0.861506
E2F_3	-7	6	5.07427	2.11252	15.5071	0	0.3778	0.6222	0.89626	0.973674	0.438211	0.861506
E2F_3	-6	7	3.81802	1.83895	12.9226	0	0.04	0.96	0.273333	1	1.73032	0.861506
E2F_3	-5	6	2.55876	1.47941	11.1996	0	0.0338	0.9662	0.273333	1	2.32609	0.861506
E2F_3	-4	3	2.12947	1.34799	8.61506	0	0.2359	0.7641	0.743992	1	0.645799	0.861506
E2F_3	-3	0	1.00452	0.932642	6.03054	0	0.6855	0	0.9998	0	-1.07707	0.861506
E2F_3	-2	55	28.208	5.02128	51.6904	12.0611	0	1	0	1	5.33568	0.861506
E2F_3	-1	25	13.9728	3.47806	29.2912	3.44602	0.0016	0.9984	0.0218667	1	3.17051	0.861506
E2F_3	0	15	17.7444	5.29059	39.0632	1.56253	0.6997	0.3003	0.9998	0.82082	-0.518726	1.21202
E2F_3	1	3	8.13702	3.54718	23.4379	0	0.9661	0.0339	0.9998	0.23165	-1.4482	1.56253
E2F_3	2	3	12.4263	4.43903	32.8131	0	0.9964	0.0036	0.9998	0.0492	-2.12351	1.56253
E2F_3	3	3	16.8025	5.12972	37.5006	1.56253	0.9998	0.0002	0.9998	0.0041	-2.69069	1.56253
E2F_3	4	8	6.26886	3.15726	21.8754	0	0.2186	0.7814	0.743992	1	0.548306	1.56253
E2F_3	5	1	1.9766	1.7633	10.9377	0	0.7215	0.2785	0.9998	0.815607	-0.553844	1.56253
E2F_3	6	1	2.75192	2.07266	12.5002	0	0.826	0.174	0.9998	0.648545	-0.845253	1.56253
E2F_3	7	4	7.98201	3.56447	25.0004	0	0.8829	0.1171	0.9998	0.533456	-1.11714	1.56253
E2F_3	8	9	10.1161	3.97121	29.688	0	0.6309	0.3691	0.994881	0.906756	-0.281051	1.56253
E2F_3	9	3	10.096	3.96696	31.2505	0	0.9881	0.0119	0.9998	0.121975	-1.78877	1.56253
E2F_3	10	2	9.43251	3.87266	28.1255	0	0.9822	0.0178	0.9998	0.14596	-1.91922	1.56253
E2F_3	11	8	8.36764	3.60804	26.563	0	0.4471	0.5529	0.89626	0.906756	-0.101896	1.56253
E2F_3	12	8	9.31094	3.82855	26.563	0	0.5465	0.4535	0.89626	0.906756	-0.342413	1.56253
E2F_3	13	8	8.5664	3.659	25.0004	0	0.468	0.532	0.89626	0.906756	-0.154796	1.56253
E2F_3	14	10	10.0392	3.95551	26.563	0	0.4587	0.5413	0.89626	0.906756	-0.00991925	1.56253
E2F_3	15	11	8.74421	3.73536	28.1255	0	0.2023	0.7977	0.743992	1	0.603901	1.56253
E2F_3	16	11	10.4999	4.05799	28.1255	0	0.3588	0.6412	0.89626	0.973674	0.123246	1.56253
E2F_3	17	9	8.78093	3.71922	28.1255	0	0.4917	0.5083	0.89626	0.906756	0.0589014	1.56253
E2F_3	18	6	8.75484	3.70907	26.563	0	0.8083	0.1917	0.9998	0.654975	-0.74273	1.56253
E2F_3	19	15	9.08578	3.77766	25.0004	0	0.0734	0.9266	0.334378	1	1.56558	1.56253
E2F_3	20	6	10.2108	3.96815	28.1255	0	0.8914	0.1086	0.9998	0.533456	-1.06115	1.56253
E2F_4	-20	39	36.5377	7.46793	68.3923	11.8943	0.3397	0.6603	0.733037	1	0.329715	1.48679
E2F_4	-19	35	37.2381	7.5579	72.8527	13.3811	0.604	0.396	0.853931	1	-0.296132	1.48679
E2F_4	-18	29	37.3926	7.581	68.3923	11.8943	0.8706	0.1294	0.996072	0.757914	-1.10706	1.48679
E2F_4	-17	44	37.836	7.50071	66.9055	11.8943	0.2119	0.7881	0.579193	1	0.821793	1.48679
E2F_4	-16	19	35.8016	7.2651	63.932	10.4075	0.9946	0.0054	0.9968	0.1107	-2.31265	1.48679
E2F_4	-15	37	37.6693	7.48008	71.3659	11.8943	0.5553	0.4447	0.813118	1	-0.0894781	1.48679
E2F_4	-14	36	37.0967	7.41292	66.9055	10.4075	0.5214	0.4786	0.813118	1	-0.14795	1.48679
E2F_4	-13	26	39.2599	7.64363	72.8527	13.3811	0.964	0.036	0.9968	0.2952	-1.73476	1.48679
E2F_4	-12	39	37.4976	7.44577	74.3395	13.3811	0.3878	0.6122	0.757133	1	0.201782	1.48679
E2F_4	-11	40	37.9276	7.47621	71.3659	14.8679	0.4114	0.5886	0.7667	1	0.277205	1.48679
E2F_4	-10	56	40.1371	7.73501	72.8527	14.8679	0.0258	0.9742	0.21156	1	2.0508	1.48679
E2F_4	-9	55	40.5975	7.77321	74.3395	14.8679	0.0441	0.9559	0.30135	1	1.85283	1.48679
E2F_4	-8	44	39.0715	7.73858	74.3395	16.3547	0.2623	0.7377	0.632606	1	0.636875	1.48679
E2F_4	-7	48	41.1865	7.8822	69.8791	14.8679	0.1851	0.8149	0.542079	1	0.864422	1.48679
E2F_4	-6	32	38.7793	7.53125	68.3923	11.8943	0.8148	0.1852	0.996072	0.843689	-0.900161	1.48679
E2F_4	-5	34	39.7707	7.64491	74.3395	11.8943	0.7917	0.2083	0.996072	0.85403	-0.754846	1.48679
E2F_4	-4	69	62.9773	9.73548	108.536	25.2754	0.2556	0.7444	0.632606	1	0.618636	1.48679
E2F_4	-3	57	45.4213	8.21389	80.2866	20.8151	0.0796	0.9204	0.4059	1	1.40965	1.48679
E2F_4	-2	22	36.3811	7.31958	72.8527	13.3811	0.9844	0.0156	0.9968	0.187575	-1.96475	1.48679
E2F_4	-1	15	22.0396	5.72855	53.5244	1.48679	0.8746	0.1254	0.996072	0.757914	-1.22886	1.48679
E2F_4	0	17	20.4011	4.86788	41.6363	4.62626	0.7649	0.2351	0.996072	0.876282	-0.698684	1.32168
E2F_4	1	108	56.9794	8.06478	93.6818	30.0707	0	1	0	1	6.32634	1.15656
E2F_4	2	41	62.9641	8.51834	95.9949	33.5404	0.9968	0.0032	0.9968	0.1107	-2.57845	1.15656
E2F_4	3	7	4.37228	2.25639	16.1919	0	0.0891	0.9109	0.4059	1	1.16457	1.15656
E2F_4	4	12	4.26287	2.23168	16.1919	0	0.0017	0.9983	0.03485	1	3.46696	1.15656
E2F_4	5	32	25.6623	5.43161	50.8889	5.78282	0.1288	0.8712	0.454075	1	1.16681	1.15656
E2F_4	6	39	31.2768	5.99626	56.6717	10.4091	0.1095	0.8905	0.44895	1	1.28801	1.15656
E2F_4	7	34	31.2629	5.91975	52.0454	11.5656	0.309	0.691	0.703833	1	0.462372	1.15656
E2F_4	8	42	29.9494	5.89756	53.202	10.4091	0.0237	0.9763	0.21156	1	2.04332	1.15656
E2F_4	9	45	31.7394	6.07699	57.8282	11.5656	0.0217	0.9783	0.21156	1	2.1821	1.15656
E2F_4	10	34	27.8425	5.66516	57.8282	6.93939	0.1329	0.8671	0.454075	1	1.08691	1.15656
E2F_4	11	34	28.9061	5.80051	50.8889	6.93939	0.185	0.815	0.542079	1	0.878174	1.15656
E2F_4	12	30	29.5107	5.85856	53.202	9.25252	0.4956	0.5044	0.813118	1	0.0835223	1.15656
E2F_4	13	32	30.2467	5.9322	58.9848	11.5656	0.3828	0.6172	0.757133	1	0.295553	1.15656
E2F_4	14	28	29.2114	5.87101	52.0454	5.78282	0.5432	0.4568	0.813118	1	-0.206329	1.15656
E2F_4	15	17	27.9435	5.70682	53.202	10.4091	0.9817	0.0183	0.9968	0.187575	-1.91762	1.15656
E2F_4	16	36	28.2491	5.73813	50.8889	9.25252	0.0795	0.9205	0.4059	1	1.35077	1.15656
E2F_4	17	28	27.5948	5.60499	52.0454	10.4091	0.4376	0.5624	0.78007	1	0.0722874	1.15656
E2F_4	18	27	27.8243	5.64088	52.0454	5.78282	0.5311	0.4689	0.813118	1	-0.146128	1.15656
E2F_4	19	21	27.1666	5.6715	50.8889	10.4091	0.8465	0.1535	0.996072	0.786687	-1.08729	1.15656
E2F_4	20	24	26.4992	5.55579	48.5757	8.09595	0.6844	0.3156	0.935347	1	-0.44984	1.15656
EBF1	-20	38	39.2501	6.34886	64.1002	19.3318	0.56	0.44	0.9978	0.82	-0.196897	1.01746
EBF1	-19	34	39.6761	6.39625	68.17	16.2794	0.8067	0.1933	0.9978	0.566093	-0.887409	1.01746
EBF1	-18	32	38.948	6.3464	67.1526	18.3143	0.8645	0.1355	0.9978	0.506823	-1.09479	1.01746
EBF1	-17	30	39.3645	6.34421	65.1177	19.3318	0.936	0.064	0.9978	0.432038	-1.47608	1.01746
EBF1	-16	33	40.711	6.37271	65.1177	18.3143	0.8863	0.1137	0.9978	0.506823	-1.21001	1.01746
EBF1	-15	45	41.9973	6.53533	68.17	17.2969	0.2999	0.7001	0.934507	0.956803	0.459453	1.01746
EBF1	-14	48	42.7331	6.61397	70.205	21.3667	0.1997	0.8003	0.744336	1	0.796337	1.01746
EBF1	-13	57	44.7492	6.77259	76.3098	21.3667	0.0326	0.9674	0.255567	1	1.80889	1.01746
EBF1	-12	56	43.3033	6.65611	68.17	16.2794	0.0268	0.9732	0.255567	1	1.90752	1.01746
EBF1	-11	40	42.8594	6.65656	71.2224	20.3493	0.6479	0.3521	0.9978	0.759795	-0.429565	1.01746
EBF1	-10	45	44.4035	6.69674	71.2224	20.3493	0.4434	0.5566	0.9978	0.941524	0.0890693	1.01746
EBF1	-9	26	43.023	6.60443	69.1875	17.2969	0.9965	0.0035	0.9978	0.07175	-2.57752	1.01746
EBF1	-8	47	46.2239	6.83498	72.2399	24.4191	0.4259	0.5741	0.9978	0.941524	0.113553	1.01746
EBF1	-7	40	47.6939	6.91763	79.3621	25.4366	0.86	0.14	0.9978	0.506823	-1.11222	1.01746
EBF1	-6	37	40.1237	6.42521	69.1875	18.3143	0.6689	0.3311	0.9978	0.754172	-0.486158	1.01746
EBF1	-5	35	36.6099	6.1343	63.0827	14.2445	0.5885	0.4115	0.9978	0.803405	-0.262436	1.01746
EBF1	-4	55	33.3784	5.83976	59.0129	15.262	0.0002	0.9998	0.0041	1	3.70248	1.01746
EBF1	-3	169	168.689	13.1109	222.824	120.061	0.4771	0.5229	0.9978	0.932126	0.0237041	1.01746
EBF1	-2	110	94.2486	9.7532	132.27	62.0653	0.0511	0.9489	0.2993	1	1.61499	1.01746
EBF1	-1	123	138.694	11.8247	182.126	97.6765	0.9157	0.0843	0.9978	0.432038	-1.32724	1.01746
EBF1	0	70	67.2477	8.31134	101.31	39.2836	0.3735	0.6265	0.971187	0.951352	0.331153	1.02562
EBF1	1	2	9.18863	3.15024	21.7093	0	0.9978	0.0022	0.9978	0.07175	-2.28193	1.03378
EBF1	2	68	84.2698	9.36233	120.952	54.7902	0.9644	0.0356	0.9978	0.33948	-1.73779	1.03378
EBF1	3	111	95.6338	9.89167	134.391	54.7902	0.0625	0.9375	0.320312	1	1.55345	1.03378
EBF1	4	165	143.085	12.1465	193.316	100.276	0.0374	0.9626	0.255567	1	1.80422	1.03378
EBF1	5	94	50.2027	7.23005	77.5334	27.912	0	1	0	1	6.05767	1.03378
EBF1	6	54	37.0893	6.23278	66.1618	16.5404	0.0046	0.9954	0.0628667	1	2.71319	1.03378
EBF1	7	24	35.1681	6.00626	67.1956	15.5067	0.9683	0.0317	0.9978	0.33948	-1.85941	1.03378
EBF1	8	34	45.4475	6.94473	72.3645	21.7093	0.9586	0.0414	0.9978	0.33948	-1.64837	1.03378
EBF1	9	42	46.0612	6.9432	77.5334	22.7431	0.7204	0.2796	0.9978	0.716475	-0.584921	1.03378
EBF1	10	36	44.954	6.82807	71.3307	21.7093	0.917	0.083	0.9978	0.432038	-1.31136	1.03378
EBF1	11	38	44.729	6.86237	78.5671	22.7431	0.8466	0.1534	0.9978	0.506823	-0.980564	1.03378
EBF1	12	39	43.4152	6.8097	72.3645	20.6756	0.7455	0.2545	0.9978	0.695633	-0.648364	1.03378
EBF1	13	47	43.9984	6.81057	76.4996	22.7431	0.3191	0.6809	0.934507	0.956803	0.440724	1.03378
EBF1	14	52	44.7826	6.84782	70.2969	19.6418	0.1403	0.8597	0.57523	1	1.05396	1.03378
EBF1	15	51	43.9441	6.79329	72.3645	21.7093	0.1395	0.8605	0.57523	1	1.03865	1.03378
EBF1	16	41	44.307	6.71276	79.6009	21.7093	0.6948	0.3052	0.9978	0.736071	-0.492644	1.03378
EBF1	17	43	41.1551	6.51968	69.2631	19.6418	0.379	0.621	0.971187	0.951352	0.282972	1.03378
EBF1	18	39	40.5676	6.51645	68.2293	18.608	0.6001	0.3999	0.9978	0.803405	-0.240564	1.03378
EBF1	19	35	41.1012	6.51119	70.2969	19.6418	0.8393	0.1607	0.9978	0.506823	-0.937027	1.03378
EBF1	20	44	40.9928	6.60063	69.2631	15.5067	0.3182	0.6818	0.934507	0.956803	0.455591	1.03378
EGR	-20	112	130.476	12.5369	183.222	78.5235	0.9281	0.0719	1	0.245658	-1.47375	1.18975
EGR	-19	104	132.882	12.6361	186.791	89.2313	0.9895	0.0105	1	0.0538125	-2.2857	1.18975
EGR	-18	130	137.83	12.9511	187.981	89.2313	0.7176	0.2824	1	0.659668	-0.604561	1.18975
EGR	-17	126	141.199	13.0331	197.499	95.18	0.8848	0.1152	1	0.363323	-1.16621	1.18975
EGR	-16	108	140.479	12.9647	190.36	92.8005	0.9956	0.0044	1	0.03608	-2.50522	1.18975
EGR	-15	102	130.915	12.4617	180.842	84.4723	0.9918	0.0082	1	0.0480286	-2.32028	1.18975
EGR	-14	167	138.512	12.9371	189.17	92.8005	0.0141	0.9859	0.0642333	1	2.20203	1.18975
EGR	-13	170	139.626	12.9379	187.981	96.3698	0.0117	0.9883	0.0599625	1	2.34771	1.18975
EGR	-12	182	145.901	13.1709	207.017	99.939	0.0049	0.9951	0.0287	1	2.74083	1.18975
EGR	-11	195	158.173	13.687	221.294	108.267	0.004	0.996	0.0273333	1	2.69067	1.18975
EGR	-10	135	142.166	13.1483	195.119	90.421	0.7034	0.2966	1	0.659668	-0.544994	1.18975
EGR	-9	142	149.033	13.3844	199.878	105.888	0.6943	0.3057	1	0.659668	-0.525453	1.18975
EGR	-8	143	127.425	12.3819	178.463	83.2825	0.1027	0.8973	0.300764	1	1.25787	1.18975
EGR	-7	174	151.499	13.4922	203.447	98.7493	0.0466	0.9534	0.159217	1	1.66774	1.18975
EGR	-6	227	205.635	15.6191	267.694	140.391	0.0901	0.9099	0.284162	1	1.36789	1.18975
EGR	-5	145	283.488	18.4239	358.115	215.345	1	0	1	0	-7.51674	1.18975
EGR	-4	85	167.935	13.9456	217.724	118.975	1	0	1	0	-5.94705	1.18975
EGR	-3	33	44.8574	7.35511	80.903	19.036	0.9576	0.0424	1	0.158036	-1.61213	1.18975
EGR	-2	83	171.907	14.3006	230.812	124.924	1	0	1	0	-6.21704	1.18975
EGR	-1	203	320.552	19.2157	396.187	255.796	1	0	1	0	-6.11749	1.18975
EGR	0	330	221.89	15.1294	277.602	158.02	0	1	0	1	7.14568	1.12873
EGR	1	184	169.999	13.5874	235.962	116.38	0.1471	0.8529	0.376944	1	1.03047	1.0677
EGR	2	124	149.394	12.6404	200.728	106.77	0.9763	0.0237	1	0.107967	-2.00898	1.0677
EGR	3	84	108.891	10.8105	151.614	65.1298	0.993	0.007	1	0.0478333	-2.30252	1.0677
EGR	4	207	157.34	12.8319	209.27	115.312	0.0002	0.9998	0.00205	1	3.87003	1.0677
EGR	5	218	141.847	12.2555	196.457	99.2963	0	1	0	1	6.21379	1.0677
EGR	6	203	124.444	11.446	168.697	82.213	0	1	0	1	6.86319	1.0677
EGR	7	163	127.814	11.6282	168.697	80.0776	0.0013	0.9987	0.01066	1	3.0259	1.0677
EGR	8	144	142.159	12.3861	185.78	98.2286	0.4502	0.5498	0.839009	1	0.148595	1.0677
EGR	9	161	134.979	11.9154	181.509	93.9578	0.0186	0.9814	0.07626	1	2.18383	1.0677
EGR	10	148	134.672	12.0702	181.509	90.7547	0.1371	0.8629	0.37474	1	1.10421	1.0677
EGR	11	140	134.379	12.2286	179.374	96.0932	0.3047	0.6953	0.671321	1	0.459691	1.0677
EGR	12	121	131.627	11.8789	179.374	91.8224	0.8142	0.1858	1	0.525347	-0.894607	1.0677
EGR	13	135	130.323	11.8693	177.239	88.6193	0.3388	0.6612	0.69454	1	0.394056	1.0677
EGR	14	131	125.158	11.5207	174.035	83.2807	0.3111	0.6889	0.671321	1	0.507085	1.0677
EGR	15	104	125.681	11.6538	174.035	84.3484	0.9701	0.0299	1	0.12259	-1.86039	1.0677
EGR	16	116	126.152	11.7206	169.765	82.213	0.8078	0.1922	1	0.525347	-0.866183	1.0677
EGR	17	119	125.189	11.6317	170.832	84.3484	0.6969	0.3031	1	0.659668	-0.53209	1.0677
EGR	18	129	125.241	11.6562	167.629	77.9422	0.3781	0.6219	0.738195	1	0.322498	1.0677
EGR	19	144	122.512	11.4467	167.629	79.0099	0.0356	0.9644	0.132691	1	1.87723	1.0677
EGR	20	129	121.734	11.5494	177.239	85.4162	0.2687	0.7313	0.648041	1	0.629151	1.0677
ETS_1	-20	141	146.793	14.1336	203.483	94.9587	0.6722	0.3278	0.923183	0.887138	-0.409847	1.35655
ETS_1	-19	167	146.385	13.9253	200.77	92.2456	0.0643	0.9357	0.292922	1	1.48039	1.35655
ETS_1	-18	157	151.903	14.4154	203.483	103.098	0.3714	0.6286	0.910924	0.991254	0.353606	1.35655
ETS_1	-17	147	146.699	14.0914	204.84	97.6718	0.4835	0.5165	0.923183	0.887138	0.0213685	1.35655
ETS_1	-16	173	148.507	14.3733	200.77	92.2456	0.0477	0.9523	0.244462	1	1.70409	1.35655
ETS_1	-15	152	154.225	14.7041	218.405	105.811	0.5367	0.4633	0.923183	0.887138	-0.151331	1.35655
ETS_1	-14	136	149.663	14.2648	206.196	100.385	0.8211	0.1789	1	0.716755	-0.95778	1.35655
ETS_1	-13	176	160.601	14.7437	231.971	105.811	0.1513	0.8487	0.512185	1	1.04443	1.35655
ETS_1	-12	151	155.2	14.5535	215.692	107.168	0.6059	0.3941	0.923183	0.887138	-0.288582	1.35655
ETS_1	-11	151	157.972	14.6556	214.335	100.385	0.6755	0.3245	0.923183	0.887138	-0.475731	1.35655
ETS_1	-10	123	156.047	14.4578	215.692	100.385	0.9921	0.0079	1	0.06478	-2.28573	1.35655
ETS_1	-9	128	159.298	14.7251	217.049	101.741	0.9869	0.0131	1	0.0767286	-2.1255	1.35655
ETS_1	-8	143	149.707	14.1065	208.909	100.385	0.6743	0.3257	0.923183	0.887138	-0.47542	1.35655
ETS_1	-7	206	185.817	15.8957	245.536	124.803	0.111	0.889	0.4551	1	1.2697	1.35655
ETS_1	-6	286	199.521	16.4521	263.171	137.012	0	1	0	1	5.25642	1.35655
ETS_1	-5	129	161.808	14.808	221.118	107.168	0.9873	0.0127	1	0.0767286	-2.21554	1.35655
ETS_1	-4	110	163.499	14.8681	215.692	105.811	0.9999	0.0001	1	0.00205	-3.59824	1.35655
ETS_1	-3	235	236.865	18.0478	306.581	166.856	0.5288	0.4712	0.923183	0.887138	-0.103309	1.35655
ETS_1	-2	60	111.421	12.1275	161.43	70.5408	1	0	1	0	-4.24	1.35655
ETS_1	-1	770	269.836	19.049	340.495	204.84	0	1	0	1	26.2566	1.35655
ETS_1	0	2181	916.298	33.8439	1044.07	783.056	0	1	0	1	37.3686	1.33082
ETS_1	1	23	45.2126	7.67461	77.0005	18.2713	0.9996	0.0004	1	0.00546667	-2.8943	1.30509
ETS_1	2	9	10.0017	3.57543	28.7121	0	0.6466	0.3534	0.923183	0.887138	-0.280166	1.30509
ETS_1	3	772	105.838	11.8524	154.001	63.9496	0	1	0	1	56.2047	1.30509
ETS_1	4	515	88.9104	10.8637	133.12	50.8986	0	1	0	1	39.2214	1.30509
ETS_1	5	224	206.447	16.0979	266.239	138.34	0.1391	0.8609	0.512185	1	1.09037	1.30509
ETS_1	6	217	176.835	15.1727	236.222	114.848	0.0057	0.9943	0.03895	1	2.6472	1.30509
ETS_1	7	136	142.311	13.745	197.069	95.2718	0.6591	0.3409	0.923183	0.887138	-0.459142	1.30509
ETS_1	8	104	143.686	13.8691	197.069	91.3565	0.9988	0.0012	1	0.0123	-2.86146	1.30509
ETS_1	9	182	167.758	14.7905	225.781	116.153	0.1624	0.8376	0.512185	1	0.962904	1.30509
ETS_1	10	153	152.898	14.1563	210.12	101.797	0.4807	0.5193	0.923183	0.887138	0.00719996	1.30509
ETS_1	11	136	148.665	13.9954	202.289	97.882	0.8077	0.1923	1	0.716755	-0.904959	1.30509
ETS_1	12	134	153.786	14.1362	208.815	100.492	0.9243	0.0757	1	0.387962	-1.39964	1.30509
ETS_1	13	146	150.206	14.0751	206.205	96.5769	0.6294	0.3706	0.923183	0.887138	-0.298849	1.30509
ETS_1	14	130	143.67	13.6644	206.205	96.5769	0.8478	0.1522	1	0.693356	-1.00041	1.30509
ETS_1	15	153	149.125	14.0853	204.9	96.5769	0.3777	0.6223	0.910924	0.991254	0.275123	1.30509
ETS_1	16	148	147.951	13.9556	207.51	99.1871	0.4875	0.5125	0.923183	0.887138	0.0034839	1.30509
ETS_1	17	152	143.748	13.5689	197.069	99.1871	0.2679	0.7321	0.73226	1	0.60816	1.30509
ETS_1	18	174	143.699	13.9384	199.679	93.9667	0.0179	0.9821	0.104843	1	2.17389	1.30509
ETS_1	19	143	144.721	13.8287	202.289	95.2718	0.5388	0.4612	0.923183	0.887138	-0.124433	1.30509
ETS_1	20	153	143.423	13.6505	191.849	90.0514	0.2296	0.7704	0.6724	1	0.701561	1.30509
ETS_2	-20	212	213.484	14.6758	277.612	160.51	0.5248	0.4752	1	0.8856	-0.101085	1.0095
ETS_2	-19	211	220.164	14.8186	276.602	167.577	0.7183	0.2817	1	0.674222	-0.618436	1.0095
ETS_2	-18	186	224.727	14.9573	289.726	170.605	0.9966	0.0034	1	0.0464667	-2.58917	1.0095
ETS_2	-17	224	219.701	14.9927	281.65	168.586	0.3978	0.6022	0.946872	0.987608	0.286733	1.0095
ETS_2	-16	241	225.947	15.0929	287.707	175.652	0.1613	0.8387	0.440887	1	0.997328	1.0095
ETS_2	-15	233	236.947	15.5727	293.764	175.652	0.6069	0.3931	1	0.805855	-0.253426	1.0095
ETS_2	-14	224	223.264	14.8526	279.631	167.577	0.4835	0.5165	1	0.920717	0.0495524	1.0095
ETS_2	-13	268	237.302	15.5345	300.83	175.652	0.0242	0.9758	0.13325	1	1.97609	1.0095
ETS_2	-12	263	241.807	15.7694	305.878	184.738	0.0955	0.9045	0.279679	1	1.34396	1.0095
ETS_2	-11	224	242.651	15.6271	308.906	189.785	0.8879	0.1121	1	0.383008	-1.19348	1.0095
ETS_2	-10	232	241.276	15.7041	303.859	182.719	0.7263	0.2737	1	0.674222	-0.590698	1.0095
ETS_2	-9	203	241.775	15.4486	299.821	187.766	0.9948	0.0052	1	0.0533	-2.50993	1.0095
ETS_2	-8	253	262.344	16.1524	330.106	207.956	0.7164	0.2836	1	0.674222	-0.578505	1.0095
ETS_2	-7	373	321.054	18.0662	386.637	248.336	0.0021	0.9979	0.01722	1	2.87533	1.0095
ETS_2	-6	351	309.403	17.8446	389.666	236.222	0.0103	0.9897	0.0703833	1	2.33106	1.0095
ETS_2	-5	305	308.782	17.6002	370.485	240.26	0.5766	0.4234	1	0.826638	-0.21491	1.0095
ETS_2	-4	354	325.765	18.0605	391.685	257.422	0.0608	0.9392	0.226618	1	1.56336	1.0095
ETS_2	-3	350	391.349	19.9122	467.397	317.992	0.9811	0.0189	1	0.118314	-2.07655	1.0095
ETS_2	-2	105	123.053	11.1676	171.615	82.7788	0.9452	0.0548	1	0.218791	-1.61654	1.0095
ETS_2	-1	1049	433.327	20.5988	515.853	357.362	0	1	0	1	29.8887	1.0095
ETS_2	0	2963	1242.77	34.5625	1379.8	1101.8	0	1	0	1	49.7717	1.01579
ETS_2	1	178	207.027	14.3209	265.74	156.378	0.9798	0.0202	1	0.118314	-2.02691	1.02208
ETS_2	2	33	62.8936	8.08919	96.0753	34.7506	1	0	1	0	-3.69551	1.02208
ETS_2	3	890	260.201	16.4695	323.999	203.393	0	1	0	1	38.2402	1.02208
ETS_2	4	735	293.404	17.3579	356.705	230.99	0	1	0	1	25.4407	1.02208
ETS_2	5	351	319.764	18.0971	389.412	241.21	0.042	0.958	0.191333	1	1.72603	1.02208
ETS_2	6	307	321.557	18.0448	392.478	251.431	0.7896	0.2104	1	0.616171	-0.80674	1.02208
ETS_2	7	268	265.009	16.4501	331.153	211.57	0.4157	0.5843	0.946872	0.987608	0.181839	1.02208
ETS_2	8	210	268.013	16.6697	331.153	203.393	0.9999	0.0001	1	0.00205	-3.48014	1.02208
ETS_2	9	245	253.495	15.8897	313.778	194.195	0.704	0.296	1	0.674222	-0.534644	1.02208
ETS_2	10	206	232.2	15.4263	293.336	171.709	0.9611	0.0389	1	0.199362	-1.69841	1.02208
ETS_2	11	212	236.537	15.5552	303.557	182.952	0.9413	0.0587	1	0.218791	-1.5774	1.02208
ETS_2	12	204	242.923	15.7718	303.557	184.996	0.9933	0.0067	1	0.05494	-2.46788	1.02208
ETS_2	13	215	229.924	15.3136	295.38	172.731	0.8298	0.1702	1	0.536785	-0.974545	1.02208
ETS_2	14	200	223.651	15.0649	280.049	159.444	0.9461	0.0539	1	0.218791	-1.56995	1.02208
ETS_2	15	257	232.735	15.5145	293.336	174.775	0.0598	0.9402	0.226618	1	1.56403	1.02208
ETS_2	16	247	226.178	15.2415	284.138	167.621	0.0882	0.9118	0.278169	1	1.36614	1.02208
ETS_2	17	245	223.709	15.2318	289.248	169.665	0.0869	0.9131	0.278169	1	1.39777	1.02208
ETS_2	18	251	220.779	15.1662	286.182	161.488	0.026	0.974	0.13325	1	1.99265	1.02208
ETS_2	19	210	216.25	14.8109	283.115	156.378	0.654	0.346	1	0.746632	-0.421994	1.02208
ETS_2	20	231	219.308	15.0835	287.204	166.599	0.2073	0.7927	0.531206	1	0.775126	1.02208
EVI1_MECOM	-20	1	1.87694	1.32537	8.59928	0	0.5915	0.4085	0.6929	0.9989	-0.661655	0.955475
EVI1_MECOM	-19	1	1.57233	1.23081	7.6438	0	0.4936	0.5064	0.680216	0.9989	-0.465003	0.955475
EVI1_MECOM	-18	0	1.92748	1.33657	8.59928	0	0.8699	0	0.891648	0	-1.44211	0.955475
EVI1_MECOM	-17	1	1.70285	1.28267	9.55475	0	0.5309	0.4691	0.680216	0.9989	-0.547958	0.955475
EVI1_MECOM	-16	1	1.49742	1.19951	9.55475	0	0.4613	0.5387	0.680216	0.9989	-0.414687	0.955475
EVI1_MECOM	-15	4	1.42108	1.18124	9.55475	0	0.0183	0.9817	0.1845	0.9989	2.18324	0.955475
EVI1_MECOM	-14	3	1.87034	1.32294	8.59928	0	0.1357	0.8643	0.427977	0.9989	0.853898	0.955475
EVI1_MECOM	-13	2	1.457	1.18869	8.59928	0	0.1929	0.8071	0.494306	0.9989	0.456802	0.955475
EVI1_MECOM	-12	2	1.66979	1.26789	8.59928	0	0.2566	0.7434	0.556575	0.9989	0.26044	0.955475
EVI1_MECOM	-11	3	1.94831	1.36254	8.59928	0	0.1475	0.8525	0.431964	0.9989	0.771859	0.955475
EVI1_MECOM	-10	2	1.97678	1.38809	8.59928	0	0.3416	0.6584	0.636618	0.9989	0.0167257	0.955475
EVI1_MECOM	-9	1	1.55542	1.218	9.55475	0	0.4838	0.5162	0.680216	0.9989	-0.456009	0.955475
EVI1_MECOM	-8	2	2.09985	1.43099	10.5102	0	0.3766	0.6234	0.643372	0.9989	-0.0697755	0.955475
EVI1_MECOM	-7	4	2.11886	1.40233	9.55475	0	0.0699	0.9301	0.260536	0.9989	1.34144	0.955475
EVI1_MECOM	-6	1	0.767533	0.850367	5.73285	0	0.1922	0.8078	0.494306	0.9989	0.273372	0.955475
EVI1_MECOM	-5	6	5.71852	2.34724	16.2431	0	0.3923	0.6077	0.643372	0.9989	0.119919	0.955475
EVI1_MECOM	-4	0	0.0217848	0.144534	1.91095	0	0.0225	0	0.1845	0	-0.150724	0.955475
EVI1_MECOM	-3	0	0.245175	0.484552	2.86643	0	0.2257	0	0.544335	0	-0.505983	0.955475
EVI1_MECOM	-2	1	0.315594	0.548908	3.8219	0	0.0451	0.9549	0.233187	0.9989	1.24685	0.955475
EVI1_MECOM	-1	1	0.336805	0.575098	3.8219	0	0.0518	0.9482	0.235978	0.9989	1.15319	0.955475
EVI1_MECOM	0	2	4.78099	2.05614	16.0433	0	0.9041	0.0959	0.9041	0.436878	-1.35253	0.923385
EVI1_MECOM	1	0	0.00445647	0.0628694	0.891295	0	0.005	0	0.0683333	0	-0.0708846	0.891295
EVI1_MECOM	2	1	0.293949	0.518229	4.45647	0	0.0455	0.9545	0.233187	0.9989	1.36243	0.891295
EVI1_MECOM	3	3	0.422474	0.615427	4.45647	0	0.0011	0.9989	0.0451	0.9989	4.18819	0.891295
EVI1_MECOM	4	0	0.890136	0.894764	5.34777	0	0.6275	0	0.714653	0	-0.994828	0.891295
EVI1_MECOM	5	5	2.66016	1.52316	8.91295	0	0.0778	0.9222	0.265817	0.9989	1.53617	0.891295
EVI1_MECOM	6	4	0.880867	0.881734	5.34777	0	0.0033	0.9967	0.06765	0.9989	3.5375	0.891295
EVI1_MECOM	7	0	1.73268	1.23953	8.91295	0	0.8576	0	0.891648	0	-1.39785	0.891295
EVI1_MECOM	8	2	1.95693	1.30749	8.91295	0	0.3773	0.6227	0.643372	0.9989	0.0329436	0.891295
EVI1_MECOM	9	2	1.56886	1.18132	8.02165	0	0.261	0.739	0.556575	0.9989	0.364968	0.891295
EVI1_MECOM	10	1	1.48106	1.14871	7.13036	0	0.496	0.504	0.680216	0.9989	-0.418788	0.891295
EVI1_MECOM	11	1	1.69061	1.2321	8.02165	0	0.5654	0.4346	0.681806	0.9989	-0.560514	0.891295
EVI1_MECOM	12	1	1.56663	1.19033	7.13036	0	0.5255	0.4745	0.680216	0.9989	-0.476028	0.891295
EVI1_MECOM	13	2	1.61779	1.18903	7.13036	0	0.2715	0.7285	0.556575	0.9989	0.321447	0.891295
EVI1_MECOM	14	0	1.56458	1.17723	8.02165	0	0.8285	0	0.891648	0	-1.32903	0.891295
EVI1_MECOM	15	2	1.75906	1.25356	8.91295	0	0.3146	0.6854	0.614219	0.9989	0.192205	0.891295
EVI1_MECOM	16	1	1.66218	1.22196	7.13036	0	0.5556	0.4444	0.681806	0.9989	-0.541895	0.891295
EVI1_MECOM	17	0	1.33828	1.10777	7.13036	0	0.7745	0	0.85823	0	-1.20808	0.891295
EVI1_MECOM	18	4	1.60549	1.18351	9.80424	0	0.035	0.965	0.233187	0.9989	2.02323	0.891295
EVI1_MECOM	19	3	1.32045	1.0876	8.91295	0	0.0617	0.9383	0.25297	0.9989	1.54427	0.891295
EVI1_MECOM	20	1	1.5611	1.17351	8.02165	0	0.5275	0.4725	0.680216	0.9989	-0.478141	0.891295
EWSR1_FLI1	-20	6	6.19964	1.96412	14.3398	0	0.464	0.536	0.653822	1	-0.101645	0.597493
EWSR1_FLI1	-19	6	7.3724	2.11025	17.3273	1.19499	0.686	0.314	0.781278	1	-0.65035	0.597493
EWSR1_FLI1	-18	14	7.35328	2.08845	16.7298	0.597493	0.0023	0.9977	0.00943	1	3.18261	0.597493
EWSR1_FLI1	-17	1	6.25754	1.9438	14.9373	0	0.9996	0.0004	0.9996	0.0164	-2.70477	0.597493
EWSR1_FLI1	-16	7	6.89082	2.01988	15.5348	1.19499	0.4793	0.5207	0.653822	1	0.054052	0.597493
EWSR1_FLI1	-15	7	7.54275	2.12333	17.9248	1.19499	0.6011	0.3989	0.704146	1	-0.25561	0.597493
EWSR1_FLI1	-14	8	7.38166	2.11653	17.3273	0.597493	0.3553	0.6447	0.653822	1	0.292148	0.597493
EWSR1_FLI1	-13	6	6.72424	2.01557	14.9373	0.597493	0.5693	0.4307	0.686509	1	-0.359323	0.597493
EWSR1_FLI1	-12	12	7.61761	2.14109	16.1323	1.19499	0.0206	0.9794	0.0767818	1	2.04681	0.597493
EWSR1_FLI1	-11	9	8.68127	2.31105	19.1198	1.79248	0.3809	0.6191	0.653822	1	0.137917	0.597493
EWSR1_FLI1	-10	13	8.28089	2.20954	17.3273	1.19499	0.0254	0.9746	0.0867833	1	2.13579	0.597493
EWSR1_FLI1	-9	7	5.55172	1.81568	13.1448	0.597493	0.2289	0.7711	0.586556	1	0.79765	0.597493
EWSR1_FLI1	-8	30	12.8914	2.78239	23.8997	4.18245	0	1	0	1	6.14889	0.597493
EWSR1_FLI1	-7	37	23.752	3.77774	38.837	9.55988	0.0008	0.9992	0.0041	1	3.50686	0.597493
EWSR1_FLI1	-6	7	9.29053	2.35304	18.5223	1.79248	0.8501	0.1499	0.917213	1	-0.973435	0.597493
EWSR1_FLI1	-5	5	3.06275	1.3619	9.55988	0	0.0772	0.9228	0.243477	1	1.42247	0.597493
EWSR1_FLI1	-4	33	11.5415	2.63198	22.7047	2.98746	0	1	0	1	8.15299	0.597493
EWSR1_FLI1	-3	53	23.4798	3.77065	38.837	8.96239	0	1	0	1	7.82895	0.597493
EWSR1_FLI1	-2	10	9.91497	2.4408	23.8997	2.38997	0.4985	0.5015	0.653822	1	0.034837	0.597493
EWSR1_FLI1	-1	3	3.25311	1.40527	8.96239	0	0.4623	0.5377	0.653822	1	-0.180113	0.597493
EWSR1_FLI1	0	22	11.5412	2.65212	23.1914	3.0515	0.0002	0.9998	0.00136667	1	3.94356	0.603897
EWSR1_FLI1	1	50	23.3685	3.75186	38.4489	10.3751	0	1	0	1	7.0982	0.610301
EWSR1_FLI1	2	11	10.0828	2.47815	20.7502	1.8309	0.3035	0.6965	0.653822	1	0.3701	0.610301
EWSR1_FLI1	3	2	2.25134	1.16446	7.93391	0	0.5078	0.4922	0.653822	1	-0.215841	0.610301
EWSR1_FLI1	4	29	11.0662	2.61819	22.5811	3.0515	0	1	0	1	6.84969	0.610301
EWSR1_FLI1	5	39	24.6666	3.88589	40.2798	10.9854	0.0003	0.9997	0.00175714	1	3.68856	0.610301
EWSR1_FLI1	6	6	5.17504	1.78976	14.0369	0	0.3438	0.6562	0.653822	1	0.460932	0.610301
EWSR1_FLI1	7	1	3.79479	1.53175	12.206	0	0.9855	0.0145	0.9996	0.29725	-1.82457	0.610301
EWSR1_FLI1	8	18	10.3723	2.52439	21.9708	1.8309	0.0017	0.9983	0.00774444	1	3.0216	0.610301
EWSR1_FLI1	9	17	15.0413	3.03772	26.8532	4.8824	0.2715	0.7285	0.653822	1	0.644779	0.610301
EWSR1_FLI1	10	8	7.70419	2.18692	17.0884	0.610301	0.3872	0.6128	0.653822	1	0.135263	0.610301
EWSR1_FLI1	11	7	6.53668	2.0261	14.6472	0.610301	0.3854	0.6146	0.653822	1	0.228673	0.610301
EWSR1_FLI1	12	8	7.46318	2.15873	15.8678	0.610301	0.3443	0.6557	0.653822	1	0.248674	0.610301
EWSR1_FLI1	13	8	8.27012	2.23203	17.0884	0.610301	0.4875	0.5125	0.653822	1	-0.121021	0.610301
EWSR1_FLI1	14	10	7.25226	2.13585	16.4781	1.2206	0.0989	0.9011	0.289636	1	1.28649	0.610301
EWSR1_FLI1	15	7	6.82163	2.04829	16.4781	0.610301	0.4382	0.5618	0.653822	1	0.0870802	0.610301
EWSR1_FLI1	16	9	7.09194	2.08221	15.8678	0.610301	0.1934	0.8066	0.528627	1	0.916363	0.610301
EWSR1_FLI1	17	6	7.83272	2.19644	17.0884	1.2206	0.8224	0.1776	0.911308	1	-0.834405	0.610301
EWSR1_FLI1	18	4	6.67351	2.02171	15.2575	0.610301	0.9194	0.0806	0.966549	1	-1.3224	0.610301
EWSR1_FLI1	19	6	6.17166	1.95636	14.6472	0	0.5564	0.4436	0.686509	1	-0.0877467	0.610301
EWSR1_FLI1	20	7	7.15431	2.09176	17.0884	0.610301	0.5103	0.4897	0.653822	1	-0.07377	0.610301
Ebox_CACCTG	-20	60	66.1393	7.48776	97.6098	37.0244	0.7891	0.2109	0.9999	0.617636	-0.81991	0.841464
Ebox_CACCTG	-19	56	65.2168	7.32875	93.4025	40.3903	0.8994	0.1006	0.9999	0.515575	-1.25762	0.841464
Ebox_CACCTG	-18	67	68.7469	7.64718	103.5	42.0732	0.5909	0.4091	0.9999	0.756717	-0.228437	0.841464
Ebox_CACCTG	-17	77	67.7025	7.58685	100.976	40.3903	0.109	0.891	0.4469	1	1.22548	0.841464
Ebox_CACCTG	-16	62	66.9586	7.56371	98.4512	41.2317	0.7437	0.2563	0.9999	0.669069	-0.65558	0.841464
Ebox_CACCTG	-15	79	69.8851	7.59082	105.183	43.7561	0.1236	0.8764	0.460691	1	1.20079	0.841464
Ebox_CACCTG	-14	64	71.7561	7.81422	101.817	42.0732	0.8241	0.1759	0.9999	0.582515	-0.992557	0.841464
Ebox_CACCTG	-13	81	69.3924	7.74997	100.976	40.3903	0.0663	0.9337	0.302033	1	1.49776	0.841464
Ebox_CACCTG	-12	70	70.478	7.7181	105.183	45.439	0.4987	0.5013	0.9999	0.790512	-0.0619378	0.841464
Ebox_CACCTG	-11	74	71.8304	7.72035	104.341	46.2805	0.4001	0.5999	0.9999	0.878425	0.281029	0.841464
Ebox_CACCTG	-10	67	68.4664	7.60481	99.2927	41.2317	0.5755	0.4245	0.9999	0.756717	-0.192831	0.841464
Ebox_CACCTG	-9	72	72.4222	7.92352	102.659	41.2317	0.5155	0.4845	0.9999	0.790512	-0.0532899	0.841464
Ebox_CACCTG	-8	59	68.8725	7.56227	99.2927	42.0732	0.8995	0.1005	0.9999	0.515575	-1.3055	0.841464
Ebox_CACCTG	-7	66	71.1807	7.73834	104.341	43.7561	0.7389	0.2611	0.9999	0.669069	-0.66948	0.841464
Ebox_CACCTG	-6	77	70.1738	7.73124	100.976	41.2317	0.1916	0.8084	0.654633	1	0.882941	0.841464
Ebox_CACCTG	-5	59	68.9086	7.56358	100.134	43.7561	0.8999	0.1001	0.9999	0.515575	-1.31005	0.841464
Ebox_CACCTG	-4	76	112.789	9.74284	147.256	74.8903	0.9999	0.0001	0.9999	0.0041	-3.776	0.841464
Ebox_CACCTG	-3	148	105.091	9.41984	141.366	66.4756	0	1	0	1	4.5552	0.841464
Ebox_CACCTG	-2	139	83.4316	8.39076	122.854	50.4878	0	1	0	1	6.62257	0.841464
Ebox_CACCTG	-1	13	6.61979	2.38307	18.5122	0	0.0083	0.9917	0.085075	1	2.67731	0.841464
Ebox_CACCTG	0	71	72.8185	7.7282	105.437	46.4918	0.5893	0.4107	0.9999	0.756717	-0.235304	0.835837
Ebox_CACCTG	1	64	79.2245	7.96364	114.569	51.4731	0.9733	0.0267	0.9999	0.273675	-1.91175	0.830211
Ebox_CACCTG	2	1	1.92169	1.25828	8.30211	0	0.6725	0.3275	0.9999	0.745972	-0.732499	0.830211
Ebox_CACCTG	3	118	77.9399	8.02917	107.097	48.9825	0	1	0	1	4.98932	0.830211
Ebox_CACCTG	4	95	80.9668	8.10824	112.909	48.9825	0.0432	0.9568	0.279825	1	1.73074	0.830211
Ebox_CACCTG	5	45	70.1694	7.64963	103.776	41.5106	0.9998	0.0002	0.9999	0.0041	-3.29027	0.830211
Ebox_CACCTG	6	55	77.6863	8.11406	112.909	48.9825	0.9979	0.0021	0.9999	0.0287	-2.79592	0.830211
Ebox_CACCTG	7	81	80.0431	8.13432	112.078	53.1335	0.4519	0.5481	0.9999	0.8323	0.117632	0.830211
Ebox_CACCTG	8	73	74.8074	7.87287	110.418	45.6616	0.6	0.4	0.9999	0.756717	-0.229575	0.830211
Ebox_CACCTG	9	84	71.7455	7.58578	97.9649	44.0012	0.0546	0.9454	0.279825	1	1.61545	0.830211
Ebox_CACCTG	10	64	72.1629	7.74934	105.437	45.6616	0.8433	0.1567	0.9999	0.582515	-1.05336	0.830211
Ebox_CACCTG	11	65	68.8057	7.56427	97.9649	41.5106	0.6763	0.3237	0.9999	0.745972	-0.50312	0.830211
Ebox_CACCTG	12	67	67.572	7.58218	97.1347	38.1897	0.5287	0.4713	0.9999	0.790512	-0.0754349	0.830211
Ebox_CACCTG	13	84	68.5002	7.58823	99.6253	42.3408	0.0216	0.9784	0.17712	1	2.04261	0.830211
Ebox_CACCTG	14	82	69.1559	7.67434	100.456	44.0012	0.0509	0.9491	0.279825	1	1.67364	0.830211
Ebox_CACCTG	15	62	70.3973	7.73033	97.9649	44.8314	0.8674	0.1326	0.9999	0.582515	-1.08628	0.830211
Ebox_CACCTG	16	60	67.6552	7.43122	97.1347	40.6803	0.8403	0.1597	0.9999	0.582515	-1.03015	0.830211
Ebox_CACCTG	17	68	70.2969	7.77373	102.946	43.171	0.6258	0.3742	0.9999	0.756717	-0.295467	0.830211
Ebox_CACCTG	18	73	66.7859	7.47496	99.6253	34.8689	0.2173	0.7827	0.685331	1	0.83132	0.830211
Ebox_CACCTG	19	58	64.2886	7.3074	97.1347	35.6991	0.8153	0.1847	0.9999	0.582515	-0.860574	0.830211
Ebox_CACCTG	20	53	62.6307	7.17837	89.6628	36.5293	0.9189	0.0811	0.9999	0.515575	-1.34163	0.830211
Ebox_CACGTG_1	-20	96	96.151	10.5483	137.846	59.8841	0.5162	0.4838	1	0.803448	-0.0143157	1.12989
Ebox_CACGTG_1	-19	73	88.1302	9.98023	129.937	54.2346	0.9384	0.0616	1	0.3608	-1.51601	1.12989
Ebox_CACGTG_1	-18	83	85.8273	9.82537	128.807	45.1955	0.6035	0.3965	1	0.803448	-0.287758	1.12989
Ebox_CACGTG_1	-17	86	90.6039	10.1308	133.327	54.2346	0.6535	0.3465	1	0.78925	-0.454449	1.12989
Ebox_CACGTG_1	-16	92	93.9339	10.2856	131.067	59.8841	0.5612	0.4388	1	0.803448	-0.188025	1.12989
Ebox_CACGTG_1	-15	95	95.0531	10.3695	142.366	57.6243	0.4786	0.5214	1	0.803448	-0.00512018	1.12989
Ebox_CACGTG_1	-14	84	94.0836	10.3022	134.457	54.2346	0.8322	0.1678	1	0.573317	-0.978787	1.12989
Ebox_CACGTG_1	-13	107	99.827	10.5904	141.236	63.2737	0.2539	0.7461	0.929438	0.957661	0.677314	1.12989
Ebox_CACGTG_1	-12	105	98.3666	10.508	137.846	59.8841	0.2723	0.7277	0.929438	0.957661	0.631273	1.12989
Ebox_CACGTG_1	-11	119	96.2328	10.4107	137.846	55.3645	0.0161	0.9839	0.220033	0.9991	2.18691	1.12989
Ebox_CACGTG_1	-10	97	98.7864	10.6225	140.106	58.7542	0.5821	0.4179	1	0.803448	-0.168168	1.12989
Ebox_CACGTG_1	-9	91	93.7741	10.3918	136.716	56.4944	0.6025	0.3975	1	0.803448	-0.266947	1.12989
Ebox_CACGTG_1	-8	113	97.8212	10.6262	154.795	56.4944	0.0718	0.9282	0.73595	0.9991	1.42843	1.12989
Ebox_CACGTG_1	-7	129	96.5339	10.6392	137.846	56.4944	0.0016	0.9984	0.0328	0.9991	3.05154	1.12989
Ebox_CACGTG_1	-6	95	102.635	10.8278	145.756	65.5335	0.7408	0.2592	1	0.71176	-0.705145	1.12989
Ebox_CACGTG_1	-5	97	103.644	10.9891	153.665	61.014	0.7396	0.2604	1	0.71176	-0.604619	1.12989
Ebox_CACGTG_1	-4	66	98.2536	10.6246	142.366	63.2737	0.9996	0.0004	1	0.00683333	-3.03576	1.12989
Ebox_CACGTG_1	-3	47	60.0915	8.19641	90.3911	33.8966	0.9504	0.0496	1	0.338933	-1.59723	1.12989
Ebox_CACGTG_1	-2	80	130.475	12.0757	183.042	88.1313	1	0	1	0	-4.17991	1.12989
Ebox_CACGTG_1	-1	7	7.31546	2.88	20.338	0	0.4709	0.5291	1	0.803448	-0.109535	1.12989
Ebox_CACGTG_1	0	31	34.9287	6.17158	60.414	12.3065	0.7445	0.2555	1	0.71176	-0.636574	1.12433
Ebox_CACGTG_1	1	36	45.416	7.13011	73.8393	22.3755	0.9012	0.0988	1	0.462927	-1.32059	1.11878
Ebox_CACGTG_1	2	19	24.434	5.2299	43.6323	7.83144	0.8758	0.1242	1	0.462927	-1.03902	1.11878
Ebox_CACGTG_1	3	105	144.019	12.5902	194.667	101.809	0.9995	0.0005	1	0.00683333	-3.09914	1.11878
Ebox_CACGTG_1	4	74	85.8198	9.81028	123.065	51.4637	0.882	0.118	1	0.462927	-1.20484	1.11878
Ebox_CACGTG_1	5	66	93.8425	10.4283	135.372	53.7013	0.9982	0.0018	1	0.01845	-2.66991	1.11878
Ebox_CACGTG_1	6	111	97.7783	10.3769	140.966	64.8891	0.0976	0.9024	0.739367	0.9991	1.27415	1.11878
Ebox_CACGTG_1	7	111	98.0717	10.668	140.966	59.2952	0.1082	0.8918	0.739367	0.9991	1.21188	1.11878
Ebox_CACGTG_1	8	134	99.1881	10.7177	143.203	66.0078	0.0009	0.9991	0.0328	0.9991	3.24807	1.11878
Ebox_CACGTG_1	9	103	95.7378	10.4527	147.679	53.7013	0.2292	0.7708	0.929438	0.957661	0.694772	1.11878
Ebox_CACGTG_1	10	100	94.5378	10.3268	139.847	54.8201	0.2947	0.7053	0.929438	0.957661	0.528938	1.11878
Ebox_CACGTG_1	11	99	99.3128	10.5912	146.56	64.8891	0.503	0.497	1	0.803448	-0.0295372	1.11878
Ebox_CACGTG_1	12	106	95.8527	10.3702	144.322	57.0576	0.1653	0.8347	0.847163	0.9991	0.978504	1.11878
Ebox_CACGTG_1	13	105	97.6714	10.4011	139.847	57.0576	0.252	0.748	0.929438	0.957661	0.704599	1.11878
Ebox_CACGTG_1	14	101	96.452	10.5038	136.491	60.414	0.3205	0.6795	0.938607	0.957661	0.432985	1.11878
Ebox_CACGTG_1	15	80	91.8235	10.158	129.778	51.4637	0.8787	0.1213	1	0.462927	-1.16396	1.11878
Ebox_CACGTG_1	16	96	95.4222	10.4143	135.372	60.414	0.4813	0.5187	1	0.803448	0.0554838	1.11878
Ebox_CACGTG_1	17	102	91.3059	10.0094	129.778	53.7013	0.1336	0.8664	0.782514	0.9991	1.0684	1.11878
Ebox_CACGTG_1	18	72	89.0887	10.0146	130.897	54.8201	0.9568	0.0432	1	0.338933	-1.70638	1.11878
Ebox_CACGTG_1	19	83	87.4022	9.82203	133.134	50.345	0.6556	0.3444	1	0.78925	-0.448199	1.11878
Ebox_CACGTG_1	20	83	88.1254	10.0967	126.422	54.8201	0.6747	0.3253	1	0.78925	-0.507632	1.11878
Ebox_CACGTG_2	-20	121	126.226	11.4687	168.629	81.7281	0.6867	0.3133	0.899515	0.83722	-0.455717	1.03453
Ebox_CACGTG_2	-19	127	123.596	11.3824	168.629	84.8317	0.3874	0.6126	0.899515	0.83722	0.299015	1.03453
Ebox_CACGTG_2	-18	117	125.887	11.4715	180.009	86.9008	0.7691	0.2309	0.925546	0.83722	-0.774746	1.03453
Ebox_CACGTG_2	-17	131	128.997	11.5933	170.698	75.5209	0.4297	0.5703	0.899515	0.83722	0.172731	1.03453
Ebox_CACGTG_2	-16	142	131.376	11.6872	174.836	92.0734	0.1741	0.8259	0.899515	0.891103	0.908993	1.03453
Ebox_CACGTG_2	-15	137	132.929	11.7189	181.043	86.9008	0.3613	0.6387	0.899515	0.844732	0.347385	1.03453
Ebox_CACGTG_2	-14	129	134.414	11.8163	183.112	92.0734	0.6818	0.3182	0.899515	0.83722	-0.458197	1.03453
Ebox_CACGTG_2	-13	141	138.395	11.9297	190.354	96.2116	0.4012	0.5988	0.899515	0.83722	0.218399	1.03453
Ebox_CACGTG_2	-12	133	139.483	12.1558	188.285	94.1425	0.7038	0.2962	0.899515	0.83722	-0.533326	1.03453
Ebox_CACGTG_2	-11	133	131.698	11.6765	175.871	88.9698	0.4481	0.5519	0.899515	0.83722	0.111486	1.03453
Ebox_CACGTG_2	-10	151	148.993	12.4172	198.63	106.557	0.448	0.552	0.899515	0.83722	0.161661	1.03453
Ebox_CACGTG_2	-9	132	141.985	12.2258	187.25	97.2461	0.7901	0.2099	0.925546	0.83722	-0.81674	1.03453
Ebox_CACGTG_2	-8	138	142.383	12.1187	189.32	95.177	0.6335	0.3665	0.899515	0.83722	-0.361655	1.03453
Ebox_CACGTG_2	-7	129	144.056	12.3799	190.354	94.1425	0.8955	0.1045	0.941423	0.837083	-1.21616	1.03453
Ebox_CACGTG_2	-6	176	146.123	12.3316	199.665	97.2461	0.0075	0.9925	0.1025	0.9947	2.42282	1.03453
Ebox_CACGTG_2	-5	152	151.219	12.367	201.734	107.591	0.4835	0.5165	0.899515	0.83722	0.0631482	1.03453
Ebox_CACGTG_2	-4	107	138.996	12.0254	188.285	99.3152	0.9967	0.0033	0.9995	0.06765	-2.66069	1.03453
Ebox_CACGTG_2	-3	148	163.503	12.9344	216.217	107.591	0.8793	0.1207	0.941423	0.837083	-1.1986	1.03453
Ebox_CACGTG_2	-2	153	150.562	12.5351	200.699	104.488	0.4266	0.5734	0.899515	0.83722	0.194476	1.03453
Ebox_CACGTG_2	-1	23	25.2484	5.13799	45.5195	4.13813	0.6446	0.3554	0.899515	0.83722	-0.437603	1.03453
Ebox_CACGTG_2	0	116	109.043	10.5028	148.22	69.4456	0.2605	0.7395	0.899515	0.891103	0.662365	1.03552
Ebox_CACGTG_2	1	82	84.9144	9.273	126.453	52.8616	0.6017	0.3983	0.899515	0.83722	-0.314284	1.0365
Ebox_CACGTG_2	2	10	14.6956	3.94593	31.095	2.073	0.895	0.105	0.941423	0.837083	-1.18999	1.0365
Ebox_CACGTG_2	3	151	122.234	11.3952	163.767	77.7376	0.0074	0.9926	0.1025	0.9947	2.52437	1.0365
Ebox_CACGTG_2	4	145	142.624	11.9956	187.607	97.4312	0.4297	0.5703	0.899515	0.83722	0.198032	1.0365
Ebox_CACGTG_2	5	94	131.946	11.8718	187.607	86.0296	0.9995	0.0005	0.9995	0.0205	-3.19628	1.0365
Ebox_CACGTG_2	6	150	154.376	12.6859	208.337	101.577	0.6361	0.3639	0.899515	0.83722	-0.344936	1.0365
Ebox_CACGTG_2	7	163	132.576	11.9328	181.388	91.2121	0.0053	0.9947	0.1025	0.9947	2.54962	1.0365
Ebox_CACGTG_2	8	143	137.295	12.0361	188.643	88.1026	0.3268	0.6732	0.899515	0.862537	0.474009	1.0365
Ebox_CACGTG_2	9	142	134.007	11.6935	179.315	87.0661	0.2591	0.7409	0.899515	0.891103	0.683508	1.0365
Ebox_CACGTG_2	10	129	136.308	12.043	184.497	87.0661	0.724	0.276	0.899515	0.83722	-0.606849	1.0365
Ebox_CACGTG_2	11	138	136.967	11.8736	182.424	99.5042	0.4509	0.5491	0.899515	0.83722	0.0869776	1.0365
Ebox_CACGTG_2	12	132	132.012	11.8024	177.242	89.1391	0.4918	0.5082	0.899515	0.83722	-0.000978001	1.0365
Ebox_CACGTG_2	13	133	138.476	12.043	184.497	95.3582	0.6656	0.3344	0.899515	0.83722	-0.454686	1.0365
Ebox_CACGTG_2	14	148	137.618	11.9551	181.388	93.2851	0.2014	0.7986	0.899515	0.891103	0.868382	1.0365
Ebox_CACGTG_2	15	143	131.845	11.6876	176.205	86.0296	0.1791	0.8209	0.899515	0.891103	0.954403	1.0365
Ebox_CACGTG_2	16	141	131.253	11.6581	172.059	89.1391	0.1927	0.8073	0.899515	0.891103	0.83611	1.0365
Ebox_CACGTG_2	17	134	132.02	11.6348	186.57	89.1391	0.4206	0.5794	0.899515	0.83722	0.170202	1.0365
Ebox_CACGTG_2	18	129	130.816	11.5204	173.096	79.8106	0.5535	0.4465	0.899515	0.83722	-0.157628	1.0365
Ebox_CACGTG_2	19	121	127.144	11.4082	175.169	87.0661	0.71	0.29	0.899515	0.83722	-0.53859	1.0365
Ebox_CACGTG_2	20	110	123.539	11.2926	169.986	81.8836	0.8775	0.1225	0.941423	0.837083	-1.1989	1.0365
Ebox_CAGATGG	-20	118	95.9554	9.18153	134.375	62.7672	0.0097	0.9903	0.0662833	1	2.40097	0.884045
Ebox_CAGATGG	-19	96	96.5063	9.33888	133.491	62.7672	0.5236	0.4764	0.9758	0.97662	-0.0542089	0.884045
Ebox_CAGATGG	-18	92	99.3424	9.35545	141.447	65.4193	0.7723	0.2277	0.9998	0.62238	-0.784831	0.884045
Ebox_CAGATGG	-17	109	97.38	9.37302	133.491	67.1874	0.1086	0.8914	0.4059	1	1.23973	0.884045
Ebox_CAGATGG	-16	94	96.3398	9.27668	137.027	59.231	0.5839	0.4161	0.997496	0.904374	-0.252222	0.884045
Ebox_CAGATGG	-15	85	97.8763	9.27178	141.447	64.5353	0.9127	0.0873	0.9998	0.38335	-1.38877	0.884045
Ebox_CAGATGG	-14	86	96.5695	9.27059	138.795	64.5353	0.8687	0.1313	0.9998	0.489391	-1.14011	0.884045
Ebox_CAGATGG	-13	112	102.484	9.557	143.215	67.1874	0.1616	0.8384	0.489364	1	0.995703	0.884045
Ebox_CAGATGG	-12	94	103.541	9.49293	142.331	69.8396	0.8391	0.1609	0.9998	0.507454	-1.00503	0.884045
Ebox_CAGATGG	-11	90	99.751	9.45604	137.027	63.6512	0.8548	0.1452	0.9998	0.4961	-1.03119	0.884045
Ebox_CAGATGG	-10	127	116.153	10.2389	160.896	81.3321	0.1476	0.8524	0.489364	1	1.05943	0.884045
Ebox_CAGATGG	-9	115	110.083	9.87824	151.172	71.6077	0.2927	0.7073	0.643484	1	0.497764	0.884045
Ebox_CAGATGG	-8	146	132.668	10.8612	172.389	92.8247	0.1089	0.8911	0.4059	1	1.2275	0.884045
Ebox_CAGATGG	-7	120	125.524	10.5835	176.809	86.6364	0.7052	0.2948	0.9998	0.710988	-0.52194	0.884045
Ebox_CAGATGG	-6	90	110.235	9.80437	153.824	73.3757	0.9854	0.0146	0.9998	0.0997667	-2.06385	0.884045
Ebox_CAGATGG	-5	98	96.4893	9.22092	132.607	66.3034	0.4443	0.5557	0.867443	1	0.163836	0.884045
Ebox_CAGATGG	-4	123	130.028	10.717	167.969	94.5928	0.7349	0.2651	0.9998	0.679319	-0.655762	0.884045
Ebox_CAGATGG	-3	159	155.21	11.811	201.562	114.042	0.3838	0.6162	0.78679	1	0.320894	0.884045
Ebox_CAGATGG	-2	101	118.255	10.2578	158.244	80.4481	0.9517	0.0483	0.9998	0.247537	-1.68217	0.884045
Ebox_CAGATGG	-1	84	106.601	9.77625	142.331	70.7236	0.9904	0.0096	0.9998	0.0984	-2.31181	0.884045
Ebox_CAGATGG	0	116	78.0486	7.78513	106.233	48.7887	0	1	0	1	4.87485	0.83548
Ebox_CAGATGG	1	87	68.101	7.36163	97.5774	40.9196	0.0051	0.9949	0.05084	1	2.56723	0.786915
Ebox_CAGATGG	2	3	3.21486	1.58811	10.2299	0	0.5809	0.4191	0.997496	0.904374	-0.135293	0.786915
Ebox_CAGATGG	3	101	80.9748	7.99072	112.529	53.5102	0.0062	0.9938	0.05084	1	2.50605	0.786915
Ebox_CAGATGG	4	30	39.6831	5.53201	65.3139	21.2467	0.96	0.04	0.9998	0.234286	-1.75037	0.786915
Ebox_CAGATGG	5	1	8.86074	2.66628	20.4598	0.786915	0.9998	0.0002	0.9998	0.0082	-2.9482	0.786915
Ebox_CAGATGG	6	186	99.8453	8.84811	136.136	66.8877	0	1	0	1	9.73708	0.786915
Ebox_CAGATGG	7	222	148.401	10.6264	191.22	106.233	0	1	0	1	6.92601	0.786915
Ebox_CAGATGG	8	65	91.6286	8.57317	125.906	59.0186	0.9992	0.0008	0.9998	0.0164	-3.10604	0.786915
Ebox_CAGATGG	9	67	84.5222	8.0729	116.463	54.2971	0.9867	0.0133	0.9998	0.0997667	-2.17049	0.786915
Ebox_CAGATGG	10	107	88.7664	8.45119	121.185	56.6578	0.0194	0.9806	0.113629	1	2.15752	0.786915
Ebox_CAGATGG	11	94	89.7212	8.41028	121.972	60.5924	0.2982	0.7018	0.643484	1	0.508763	0.786915
Ebox_CAGATGG	12	92	86.5997	8.20836	117.25	54.2971	0.2646	0.7354	0.643484	1	0.657901	0.786915
Ebox_CAGATGG	13	68	87.8594	8.42196	119.611	58.2317	0.9926	0.0074	0.9998	0.0984	-2.35805	0.786915
Ebox_CAGATGG	14	88	83.5116	8.12108	114.103	52.7233	0.2945	0.7055	0.643484	1	0.552683	0.786915
Ebox_CAGATGG	15	97	86.844	8.24994	125.119	57.4448	0.1068	0.8932	0.4059	1	1.23104	0.786915
Ebox_CAGATGG	16	78	85.2679	8.25487	117.25	55.8709	0.7989	0.2011	0.9998	0.588936	-0.880432	0.786915
Ebox_CAGATGG	17	94	86.1941	8.2484	121.185	57.4448	0.1671	0.8329	0.489364	1	0.94635	0.786915
Ebox_CAGATGG	18	74	84.8147	8.17395	116.463	55.084	0.9065	0.0935	0.9998	0.38335	-1.32307	0.786915
Ebox_CAGATGG	19	89	84.9972	8.10484	118.824	53.5102	0.2927	0.7073	0.643484	1	0.493873	0.786915
Ebox_CAGATGG	20	94	82.5081	8.14501	114.89	56.6578	0.0766	0.9234	0.392575	1	1.41091	0.786915
Ebox_CAGCTG	-20	92	93.4597	8.52894	128.414	63.0538	0.5674	0.4326	1	0.771157	-0.171151	0.768948
Ebox_CAGCTG	-19	94	97.7264	8.67805	129.952	66.1295	0.6509	0.3491	1	0.650595	-0.429405	0.768948
Ebox_CAGCTG	-18	108	97.0726	8.73115	129.183	65.3606	0.1066	0.8934	0.546325	1	1.25154	0.768948
Ebox_CAGCTG	-17	106	97.633	8.7529	132.259	67.6674	0.1763	0.8237	0.657118	1	0.955915	0.768948
Ebox_CAGCTG	-16	98	96.5959	8.6221	126.876	68.4364	0.4317	0.5683	1	0.932012	0.16285	0.768948
Ebox_CAGCTG	-15	87	99.3186	8.7717	136.104	69.9743	0.9191	0.0809	1	0.279142	-1.40436	0.768948
Ebox_CAGCTG	-14	114	100.513	8.87568	134.566	71.5122	0.0635	0.9365	0.433917	1	1.51956	0.768948
Ebox_CAGCTG	-13	111	100.709	8.88026	137.642	69.2053	0.1228	0.8772	0.559422	1	1.15885	0.768948
Ebox_CAGCTG	-12	108	101.713	8.73885	131.49	66.8985	0.2342	0.7658	0.738631	1	0.719403	0.768948
Ebox_CAGCTG	-11	84	96.4882	8.67277	133.028	62.2848	0.9259	0.0741	1	0.279142	-1.43994	0.768948
Ebox_CAGCTG	-10	82	102.768	8.95593	139.18	69.2053	0.9917	0.0083	1	0.06806	-2.31886	0.768948
Ebox_CAGCTG	-9	102	98.547	8.8001	133.797	67.6674	0.3457	0.6543	0.885856	1	0.392379	0.768948
Ebox_CAGCTG	-8	96	102.463	8.87269	135.335	70.7432	0.7717	0.2283	1	0.585019	-0.72842	0.768948
Ebox_CAGCTG	-7	107	102.222	8.93993	139.18	73.0501	0.2826	0.7174	0.827614	1	0.53445	0.768948
Ebox_CAGCTG	-6	98	104.87	8.92034	142.255	74.588	0.774	0.226	1	0.585019	-0.770168	0.768948
Ebox_CAGCTG	-5	82	105.486	9.07328	144.562	73.819	0.9963	0.0037	1	0.037925	-2.58851	0.768948
Ebox_CAGCTG	-4	161	111.853	9.27631	152.252	76.8948	0	1	0	1	5.29812	0.768948
Ebox_CAGCTG	-3	177	92.8134	8.39278	128.414	56.9022	0	1	0	1	10.0308	0.768948
Ebox_CAGCTG	-2	5	14.2878	3.35686	29.22	3.07579	0.9991	0.0009	1	0.0123	-2.7668	0.768948
Ebox_CAGCTG	-1	57	56.7325	6.50578	83.0464	33.0648	0.4585	0.5415	1	0.925063	0.0411231	0.768948
Ebox_CAGCTG	0	89	99.7366	9.24697	134.511	65.9704	0.8837	0.1163	1	0.366792	-1.1611	0.812853
Ebox_CAGCTG	1	1	5.62179	2.44268	17.1352	0	0.9823	0.0177	1	0.12095	-1.8921	0.856759
Ebox_CAGCTG	2	117	87.541	8.61455	118.233	57.4028	0.0004	0.9996	0.00546667	1	3.41968	0.856759
Ebox_CAGCTG	3	138	124.309	10.3053	160.214	89.1029	0.0895	0.9105	0.524214	1	1.32855	0.856759
Ebox_CAGCTG	4	73	109.851	9.77866	149.076	72.8245	0.9998	0.0002	1	0.0041	-3.76855	0.856759
Ebox_CAGCTG	5	86	133.638	10.8018	173.922	95.1002	1	0	1	0	-4.41016	0.856759
Ebox_CAGCTG	6	128	134.522	10.8086	179.063	91.6732	0.7197	0.2803	1	0.638461	-0.603421	0.856759
Ebox_CAGCTG	7	113	117.624	10.0329	158.5	78.8218	0.686	0.314	1	0.650595	-0.460848	0.856759
Ebox_CAGCTG	8	98	111.534	9.68455	152.503	75.3948	0.9183	0.0817	1	0.279142	-1.39744	0.856759
Ebox_CAGCTG	9	96	115.284	9.91014	155.073	79.6786	0.9747	0.0253	1	0.148186	-1.94591	0.856759
Ebox_CAGCTG	10	96	114.391	9.96479	163.641	73.6812	0.97	0.03	1	0.15375	-1.8456	0.856759
Ebox_CAGCTG	11	130	112.296	9.79525	149.076	79.6786	0.0392	0.9608	0.33784	1	1.80739	0.856759
Ebox_CAGCTG	12	122	112.214	9.86993	149.933	71.111	0.1589	0.8411	0.65149	1	0.991483	0.856759
Ebox_CAGCTG	13	131	113.479	9.88152	151.646	78.8218	0.0412	0.9588	0.33784	1	1.77314	0.856759
Ebox_CAGCTG	14	106	111.601	9.82476	155.93	75.3948	0.7211	0.2789	1	0.638461	-0.570051	0.856759
Ebox_CAGCTG	15	107	111.446	9.79262	149.933	71.111	0.6823	0.3177	1	0.650595	-0.454012	0.856759
Ebox_CAGCTG	16	120	112.664	9.88614	157.644	78.8218	0.2164	0.7836	0.738631	1	0.74203	0.856759
Ebox_CAGCTG	17	112	107.692	9.72712	144.792	71.111	0.3276	0.6724	0.885856	1	0.442886	0.856759
Ebox_CAGCTG	18	92	108.051	9.68835	148.219	77.1083	0.9534	0.0466	1	0.212289	-1.65678	0.856759
Ebox_CAGCTG	19	95	103.677	9.37847	141.365	72.8245	0.8299	0.1701	1	0.49815	-0.925182	0.856759
Ebox_CAGCTG	20	101	104.485	9.38923	137.081	69.3975	0.6562	0.3438	1	0.650595	-0.37113	0.856759
Ebox_CATATG	-20	8	10.3424	3.16234	23.8217	0.952867	0.755	0.245	0.83917	1	-0.740723	0.952867
Ebox_CATATG	-19	12	10.0007	3.07648	22.8688	0.952867	0.2551	0.7449	0.522955	1	0.649859	0.952867
Ebox_CATATG	-18	9	9.8576	3.10507	22.8688	0	0.58	0.42	0.817267	1	-0.276193	0.952867
Ebox_CATATG	-17	8	11.119	3.29114	25.7274	0	0.8214	0.1786	0.886247	1	-0.947699	0.952867
Ebox_CATATG	-16	10	11.2285	3.23772	27.6331	0.952867	0.6317	0.3683	0.835474	1	-0.37943	0.952867
Ebox_CATATG	-15	13	11.5453	3.29139	25.7274	0.952867	0.329	0.671	0.613136	1	0.441966	0.952867
Ebox_CATATG	-14	10	10.9867	3.24765	26.6803	1.90573	0.598	0.402	0.817267	1	-0.303805	0.952867
Ebox_CATATG	-13	15	11.5251	3.2914	24.7745	0.952867	0.1621	0.8379	0.474721	1	1.05575	0.952867
Ebox_CATATG	-12	14	11.296	3.29804	25.7274	0	0.2152	0.7848	0.522955	1	0.819867	0.952867
Ebox_CATATG	-11	8	10.3886	3.13548	23.8217	1.90573	0.7573	0.2427	0.83917	1	-0.761808	0.952867
Ebox_CATATG	-10	13	11.7056	3.35047	25.7274	1.90573	0.3472	0.6528	0.61705	1	0.386337	0.952867
Ebox_CATATG	-9	6	11.0384	3.25307	24.7745	0.952867	0.9443	0.0557	0.967908	0.570925	-1.54881	0.952867
Ebox_CATATG	-8	9	10.5268	3.175	23.8217	1.90573	0.6647	0.3353	0.83917	1	-0.480882	0.952867
Ebox_CATATG	-7	15	11.203	3.25681	26.6803	0.952867	0.1345	0.8655	0.432392	1	1.16588	0.952867
Ebox_CATATG	-6	14	11.6226	3.34038	28.586	0.952867	0.2433	0.7567	0.522955	1	0.711716	0.952867
Ebox_CATATG	-5	9	11.0438	3.2894	25.7274	1.90573	0.7142	0.2858	0.83917	1	-0.621336	0.952867
Ebox_CATATG	-4	16	13.3205	3.55788	29.5389	2.8586	0.2381	0.7619	0.522955	1	0.753114	0.952867
Ebox_CATATG	-3	19	14.1557	3.68889	29.5389	1.90573	0.1133	0.8867	0.4223	1	1.31321	0.952867
Ebox_CATATG	-2	27	10.4009	3.15244	23.8217	0.952867	0	1	0	1	5.26547	0.952867
Ebox_CATATG	-1	0	0.0255368	0.155654	1.90573	0	0.0265	0	0.181083	0	-0.164061	0.952867
Ebox_CATATG	0	8	4.83572	1.78378	12.4233	0	0.0402	0.9598	0.228063	1	1.77392	0.803362
Ebox_CATATG	1	7	2.67761	1.31792	9.15398	0	0.0034	0.9966	0.03485	1	3.27972	0.653856
Ebox_CATATG	2	0	0.0141887	0.0961664	1.30771	0	0.0215	0	0.1763	0	-0.147543	0.653856
Ebox_CATATG	3	33	8.35249	2.34014	19.6157	0.653856	0	1	0	1	10.5325	0.653856
Ebox_CATATG	4	39	13.6498	2.98	25.5004	3.92314	0	1	0	1	8.50676	0.653856
Ebox_CATATG	5	9	9.03269	2.44007	18.9618	1.96157	0.513	0.487	0.751179	1	-0.0133986	0.653856
Ebox_CATATG	6	8	7.80037	2.27055	17.6541	1.30771	0.4137	0.5863	0.628211	1	0.0879207	0.653856
Ebox_CATATG	7	11	7.68542	2.2607	18.308	1.30771	0.0886	0.9114	0.36326	1	1.46617	0.653856
Ebox_CATATG	8	12	8.05871	2.26507	17.0003	1.96157	0.0445	0.9555	0.228063	1	1.74003	0.653856
Ebox_CATATG	9	9	7.34326	2.17108	17.6541	0.653856	0.2396	0.7604	0.522955	1	0.763096	0.653856
Ebox_CATATG	10	2	7.50359	2.2355	18.9618	0.653856	0.9952	0.0048	0.9952	0.0656	-2.46191	0.653856
Ebox_CATATG	11	9	6.99292	2.14268	16.3464	0.653856	0.1926	0.8074	0.522955	1	0.936712	0.653856
Ebox_CATATG	12	8	7.58721	2.2049	16.3464	0.653856	0.3816	0.6184	0.61705	1	0.187213	0.653856
Ebox_CATATG	13	9	7.69347	2.27042	17.6541	1.30771	0.2957	0.7043	0.577319	1	0.575458	0.653856
Ebox_CATATG	14	10	7.69981	2.25449	17.6541	0.653856	0.1371	0.8629	0.432392	1	1.02027	0.653856
Ebox_CATATG	15	6	7.5472	2.19319	17.0003	0	0.7197	0.2803	0.83917	1	-0.705456	0.653856
Ebox_CATATG	16	8	7.60153	2.22637	17.0003	1.30771	0.3794	0.6206	0.61705	1	0.178976	0.653856
Ebox_CATATG	17	8	7.65495	2.21872	18.9618	1.30771	0.3913	0.6087	0.61705	1	0.155516	0.653856
Ebox_CATATG	18	5	7.07106	2.14983	17.0003	0.653856	0.8434	0.1566	0.886651	1	-0.963361	0.653856
Ebox_CATATG	19	6	7.30978	2.20032	15.6925	0.653856	0.6789	0.3211	0.83917	1	-0.595269	0.653856
Ebox_CATATG	20	11	7.33522	2.20411	16.3464	0.653856	0.066	0.934	0.300667	1	1.6627	0.653856
FEZF1	-20	4	8.13116	2.95504	22.688	0	0.94	0.06	0.9876	0.281078	-1.398	1.08038
FEZF1	-19	8	8.01048	2.93068	19.4468	0	0.4693	0.5307	0.803915	0.9994	-0.00357591	1.08038
FEZF1	-18	9	7.87338	2.95164	19.4468	0	0.3076	0.6924	0.700644	0.9994	0.381693	1.08038
FEZF1	-17	7	8.8307	3.09972	20.5272	0	0.7071	0.2929	0.915709	0.858364	-0.590603	1.08038
FEZF1	-16	12	9.16346	3.15913	21.6076	0	0.151	0.849	0.412733	0.9994	0.897885	1.08038
FEZF1	-15	4	8.4771	3.02248	25.9291	0	0.9553	0.0447	0.9876	0.281078	-1.48127	1.08038
FEZF1	-14	8	8.77885	3.10694	22.688	0	0.5623	0.4377	0.853863	0.9994	-0.25068	1.08038
FEZF1	-13	7	8.40903	3.0294	20.5272	0	0.6583	0.3417	0.915709	0.93398	-0.46512	1.08038
FEZF1	-12	14	8.82552	3.09924	27.0095	0	0.0732	0.9268	0.272836	0.9994	1.6696	1.08038
FEZF1	-11	14	9.36387	3.1803	23.7684	1.08038	0.0993	0.9007	0.339275	0.9994	1.45776	1.08038
FEZF1	-10	7	8.13083	2.96719	21.6076	0	0.6277	0.3723	0.915709	0.954019	-0.381113	1.08038
FEZF1	-9	6	7.69631	2.89129	19.4468	0	0.7147	0.2853	0.915709	0.858364	-0.586696	1.08038
FEZF1	-8	4	8.07887	3.01139	21.6076	0	0.9383	0.0617	0.9876	0.281078	-1.35448	1.08038
FEZF1	-7	3	7.91443	2.90936	21.6076	0	0.9777	0.0223	0.9876	0.19434	-1.68918	1.08038
FEZF1	-6	4	7.13429	2.83088	20.5272	0	0.8898	0.1102	0.9876	0.45182	-1.10718	1.08038
FEZF1	-5	5	7.46575	2.83413	20.5272	0	0.8206	0.1794	0.9876	0.668673	-0.870021	1.08038
FEZF1	-4	0	0.0773552	0.286821	2.16076	0	0.0696	0	0.272836	0	-0.269699	1.08038
FEZF1	-3	2	1.55726	1.325	10.8038	0	0.4231	0.5769	0.803915	0.9994	0.334142	1.08038
FEZF1	-2	11	4.86182	2.26927	19.4468	0	0.0069	0.9931	0.070725	0.9994	2.70491	1.08038
FEZF1	-1	29	19.2438	4.57403	37.8133	5.4019	0.0272	0.9728	0.163414	0.9994	2.13295	1.08038
FEZF1	0	16	15.8993	3.8258	32.539	3.71874	0.4431	0.5569	0.803915	0.9994	0.0263236	1.00503
FEZF1	1	4	1.19474	1.04669	7.43748	0	0.0091	0.9909	0.07462	0.9994	2.68013	0.929685
FEZF1	2	9	4.82246	2.13206	16.7343	0	0.0391	0.9609	0.188144	0.9994	1.95939	0.929685
FEZF1	3	0	0.00120859	0.0335002	0.929685	0	0.0013	0	0.0177667	0	-0.0360772	0.929685
FEZF1	4	14	8.60359	2.8503	20.4531	0.929685	0.0279	0.9721	0.163414	0.9994	1.89328	0.929685
FEZF1	5	26	13.7634	3.55704	29.7499	2.78906	0.0006	0.9994	0.01435	0.9994	3.4401	0.929685
FEZF1	6	17	7.4478	2.64795	19.5234	0	0.0007	0.9993	0.01435	0.9994	3.60739	0.929685
FEZF1	7	13	7.69714	2.65797	17.664	0	0.0413	0.9587	0.188144	0.9994	1.99507	0.929685
FEZF1	8	2	7.53426	2.66619	20.4531	0	0.9876	0.0124	0.9876	0.169467	-2.07572	0.929685
FEZF1	9	8	7.34247	2.61017	19.5234	0	0.3939	0.6061	0.803915	0.9994	0.251911	0.929685
FEZF1	10	2	6.88199	2.53858	19.5234	0	0.9763	0.0237	0.9876	0.19434	-1.92312	0.929685
FEZF1	11	6	6.23149	2.39331	17.664	0	0.503	0.497	0.803915	0.9994	-0.0967256	0.929685
FEZF1	12	8	6.72144	2.51189	18.5937	0	0.3027	0.6973	0.700644	0.9994	0.509003	0.929685
FEZF1	13	9	6.57092	2.46165	17.664	0	0.1763	0.8237	0.451769	0.9994	0.98677	0.929685
FEZF1	14	8	6.9573	2.51628	17.664	0	0.3339	0.6661	0.720521	0.9994	0.414381	0.929685
FEZF1	15	3	6.96632	2.56457	21.3828	0	0.9402	0.0598	0.9876	0.281078	-1.54658	0.929685
FEZF1	16	10	7.10112	2.55899	18.5937	0	0.1495	0.8505	0.412733	0.9994	1.13282	0.929685
FEZF1	17	6	6.26022	2.42936	18.5937	0	0.5098	0.4902	0.803915	0.9994	-0.107115	0.929685
FEZF1	18	10	6.64697	2.52509	18.5937	0	0.1124	0.8876	0.354492	0.9994	1.32789	0.929685
FEZF1	19	6	6.14671	2.41776	16.7343	0	0.4926	0.5074	0.803915	0.9994	-0.0606789	0.929685
FEZF1	20	4	5.51015	2.25048	14.875	0	0.7069	0.2931	0.915709	0.858364	-0.671035	0.929685
FOX_1	-20	10	6.4183	2.59152	18.1215	0	0.0851	0.9149	0.654243	1	1.38209	1.06597
FOX_1	-19	8	7.13942	2.78098	18.1215	0	0.3622	0.6378	0.8569	1	0.309451	1.06597
FOX_1	-18	7	6.71869	2.67079	18.1215	0	0.4366	0.5634	0.89503	1	0.105329	1.06597
FOX_1	-17	7	6.13091	2.57434	19.1874	0	0.3521	0.6479	0.8569	1	0.337597	1.06597
FOX_1	-16	5	6.55655	2.65353	19.1874	0	0.7333	0.2667	1	0.683419	-0.586598	1.06597
FOX_1	-15	6	6.56071	2.64252	18.1215	0	0.5813	0.4187	0.916665	0.921421	-0.212188	1.06597
FOX_1	-14	9	7.05255	2.76811	19.1874	0	0.2226	0.7774	0.821708	1	0.703531	1.06597
FOX_1	-13	4	6.95011	2.70147	20.2534	0	0.8917	0.1083	1	0.392338	-1.09204	1.06597
FOX_1	-12	1	6.60335	2.65788	19.1874	0	0.9982	0.0018	1	0.0123	-2.1082	1.06597
FOX_1	-11	8	6.59184	2.66903	19.1874	0	0.2827	0.7173	0.8569	1	0.527593	1.06597
FOX_1	-10	3	5.88286	2.51514	18.1215	0	0.9101	0.0899	1	0.392338	-1.1462	1.06597
FOX_1	-9	11	6.38834	2.61185	17.0555	0	0.042	0.958	0.505325	1	1.76567	1.06597
FOX_1	-8	5	6.74427	2.7129	19.1874	0	0.7524	0.2476	1	0.683419	-0.642954	1.06597
FOX_1	-7	9	7.07291	2.73569	20.2534	0	0.2221	0.7779	0.821708	1	0.704425	1.06597
FOX_1	-6	5	8.07737	2.91342	19.1874	0	0.8756	0.1244	1	0.392338	-1.05628	1.06597
FOX_1	-5	12	7.35294	2.79941	19.1874	0	0.0493	0.9507	0.505325	1	1.66001	1.06597
FOX_1	-4	9	4.89642	2.2832	14.9235	0	0.0441	0.9559	0.505325	1	1.7973	1.06597
FOX_1	-3	0	0.490985	0.71895	4.26387	0	0.3712	0	0.8569	0	-0.682919	1.06597
FOX_1	-2	0	0.893814	0.979822	6.39581	0	0.5667	0	0.916665	0	-0.912221	1.06597
FOX_1	-1	0	0	0	0	0	1	1	1	1	0	1.06597
FOX_1	0	15	9.39568	3.0939	24.8429	0	0.0435	0.9565	0.505325	1	1.81141	1.05054
FOX_1	1	20	42.7296	6.57559	73.4935	20.7024	1	0	1	0	-3.45667	1.03512
FOX_1	2	0	0	0	0	0	1	1	1	1	0	1.03512
FOX_1	3	0	0.735556	0.865992	5.1756	0	0.5112	0	0.916665	0	-0.849379	1.03512
FOX_1	4	0	0.123593	0.360299	3.10536	0	0.1117	0	0.654243	0	-0.34303	1.03512
FOX_1	5	13	14.1408	3.79589	31.0536	2.07024	0.6121	0.3879	0.929485	0.921421	-0.300527	1.03512
FOX_1	6	6	6.29736	2.53342	17.597	0	0.573	0.427	0.916665	0.921421	-0.117373	1.03512
FOX_1	7	1	6.22541	2.5661	18.6321	0	0.9971	0.0029	1	0.0169857	-2.03633	1.03512
FOX_1	8	7	6.13598	2.53982	17.597	0	0.3797	0.6203	0.8569	1	0.340189	1.03512
FOX_1	9	8	6.50893	2.58364	17.597	0	0.2972	0.7028	0.8569	1	0.577119	1.03512
FOX_1	10	10	7.23528	2.71639	19.6673	0	0.1671	0.8329	0.761233	1	1.01779	1.03512
FOX_1	11	9	6.99441	2.68796	18.6321	0	0.2405	0.7595	0.821708	1	0.74614	1.03512
FOX_1	12	4	6.66575	2.6347	16.5619	0	0.8835	0.1165	1	0.392338	-1.01179	1.03512
FOX_1	13	7	6.79018	2.64895	20.7024	0	0.4853	0.5147	0.916665	1	0.0792102	1.03512
FOX_1	14	1	5.98547	2.47366	16.5619	0	0.9963	0.0037	1	0.0189625	-2.01543	1.03512
FOX_1	15	10	6.47923	2.59209	19.6673	0	0.1009	0.8991	0.654243	1	1.35828	1.03512
FOX_1	16	4	6.55934	2.57988	17.597	0	0.8822	0.1178	1	0.392338	-0.992042	1.03512
FOX_1	17	7	6.21703	2.54721	16.5619	0	0.3971	0.6029	0.8569	1	0.307384	1.03512
FOX_1	18	5	6.42136	2.56737	18.6321	0	0.7355	0.2645	1	0.683419	-0.553627	1.03512
FOX_1	19	6	6.17532	2.54341	15.5268	0	0.5464	0.4536	0.916665	0.92988	-0.0689291	1.03512
FOX_1	20	8	5.47143	2.37605	15.5268	0	0.166	0.834	0.761233	1	1.06419	1.03512
FOX_2	-20	2	1.62604	1.39988	8.45701	0	0.3957	0.6043	0.629981	0.89421	0.267137	1.20814
FOX_2	-19	1	1.41063	1.30425	8.45701	0	0.6877	0.3123	0.7771	0.673911	-0.314839	1.20814
FOX_2	-18	3	1.068	1.1313	7.24886	0	0.0612	0.9388	0.404729	0.9798	1.70777	1.20814
FOX_2	-17	2	1.48143	1.33485	8.45701	0	0.3467	0.6533	0.629981	0.89421	0.388488	1.20814
FOX_2	-16	3	1.59137	1.39147	10.8733	0	0.1507	0.8493	0.61869	0.967258	1.01233	1.20814
FOX_2	-15	1	1.78503	1.45211	9.66515	0	0.7771	0.2229	0.7771	0.63468	-0.540617	1.20814
FOX_2	-14	2	1.85909	1.50658	9.66515	0	0.4541	0.5459	0.689559	0.89421	0.0935288	1.20814
FOX_2	-13	0	1.6177	1.41431	8.45701	0	0.7357	0	0.7771	0	-1.14381	1.20814
FOX_2	-12	0	1.55573	1.36539	9.66515	0	0.7227	0	0.7771	0	-1.1394	1.20814
FOX_2	-11	1	1.50535	1.34859	8.45701	0	0.7126	0.2874	0.7771	0.654633	-0.374723	1.20814
FOX_2	-10	1	1.56358	1.38277	8.45701	0	0.7254	0.2746	0.7771	0.654633	-0.407573	1.20814
FOX_2	-9	2	1.66712	1.40515	9.66515	0	0.3995	0.6005	0.629981	0.89421	0.236902	1.20814
FOX_2	-8	1	1.74843	1.44208	8.45701	0	0.7678	0.2322	0.7771	0.63468	-0.518991	1.20814
FOX_2	-7	1	1.58351	1.38737	9.66515	0	0.7326	0.2674	0.7771	0.654633	-0.420591	1.20814
FOX_2	-6	1	1.81016	1.48112	10.8733	0	0.775	0.225	0.7771	0.63468	-0.546992	1.20814
FOX_2	-5	2	1.10545	1.15961	8.45701	0	0.2401	0.7599	0.629981	0.91635	0.771423	1.20814
FOX_2	-4	0	1.5219	1.35656	9.66515	0	0.7165	0	0.7771	0	-1.12188	1.20814
FOX_2	-3	0	0.568673	0.827899	6.04072	0	0.376	0	0.629981	0	-0.686887	1.20814
FOX_2	-2	0	0.198498	0.490932	3.62443	0	0.1509	0	0.61869	0	-0.404329	1.20814
FOX_2	-1	1	0.899342	1.04079	8.45701	0	0.525	0.475	0.76875	0.89421	0.0967129	1.20814
FOX_2	0	0	0.103547	0.279975	2.29086	0	0.1271	0	0.61869	0	-0.369843	0.985882
FOX_2	1	0	0.0235959	0.133466	1.52724	0	0.0306	0	0.404729	0	-0.176793	0.763621
FOX_2	2	0	0.33775	0.50763	3.81811	0	0.3569	0	0.629981	0	-0.665346	0.763621
FOX_2	3	0	0.0545225	0.203343	1.52724	0	0.0691	0	0.404729	0	-0.268131	0.763621
FOX_2	4	1	0.218243	0.409052	3.05448	0	0.034	0.966	0.404729	0.9798	1.91114	0.763621
FOX_2	5	0	0.887251	0.820174	5.34535	0	0.6882	0	0.7771	0	-1.08178	0.763621
FOX_2	6	1	0.306288	0.479721	3.05448	0	0.0613	0.9387	0.404729	0.9798	1.44607	0.763621
FOX_2	7	2	1.10656	0.924378	5.34535	0	0.1803	0.8197	0.629981	0.96022	0.966528	0.763621
FOX_2	8	1	1.02455	0.881073	5.34535	0	0.3899	0.6101	0.629981	0.89421	-0.0278642	0.763621
FOX_2	9	3	0.794777	0.76972	5.34535	0	0.0202	0.9798	0.404729	0.9798	2.86497	0.763621
FOX_2	10	1	0.955137	0.855196	6.10897	0	0.3546	0.6454	0.629981	0.89421	0.052459	0.763621
FOX_2	11	1	0.819518	0.791573	5.34535	0	0.2915	0.7085	0.629981	0.910328	0.228004	0.763621
FOX_2	12	1	0.948952	0.855365	6.10897	0	0.3499	0.6501	0.629981	0.89421	0.0596798	0.763621
FOX_2	13	1	0.814096	0.78858	4.58173	0	0.2895	0.7105	0.629981	0.910328	0.235745	0.763621
FOX_2	14	1	0.961475	0.862146	5.34535	0	0.3577	0.6423	0.629981	0.89421	0.0446846	0.763621
FOX_2	15	1	0.932381	0.833809	5.34535	0	0.3457	0.6543	0.629981	0.89421	0.0810961	0.763621
FOX_2	16	1	0.740025	0.749066	4.58173	0	0.2539	0.7461	0.629981	0.91635	0.347065	0.763621
FOX_2	17	1	1.00118	0.861656	5.34535	0	0.3762	0.6238	0.629981	0.89421	-0.00137366	0.763621
FOX_2	18	0	1.00928	0.880896	6.10897	0	0.7299	0	0.7771	0	-1.14574	0.763621
FOX_2	19	0	0.963155	0.861218	5.34535	0	0.7109	0	0.7771	0	-1.11836	0.763621
FOX_2	20	2	0.575847	0.66899	3.81811	0	0.0434	0.9566	0.404729	0.9798	2.12881	0.763621
FOX_3	-20	10	3.91953	1.85012	12.2919	0	0.0023	0.9977	0.0943	0.9977	3.28654	0.877991
FOX_3	-19	2	3.83375	1.84654	11.4139	0	0.8067	0.1933	0.944991	0.779683	-0.993071	0.877991
FOX_3	-18	4	3.69081	1.78749	11.4139	0	0.4139	0.5861	0.799671	0.894073	0.172975	0.877991
FOX_3	-17	1	3.49809	1.74876	12.2919	0	0.9049	0.0951	0.973135	0.581029	-1.4285	0.877991
FOX_3	-16	2	3.52074	1.73026	11.4139	0	0.7718	0.2282	0.944991	0.779683	-0.878908	0.877991
FOX_3	-15	4	3.44646	1.74899	12.2919	0	0.353	0.647	0.799671	0.894073	0.316488	0.877991
FOX_3	-14	2	3.73366	1.823	11.4139	0	0.7951	0.2049	0.944991	0.779683	-0.950988	0.877991
FOX_3	-13	6	4.3601	1.9765	14.0479	0	0.2348	0.7652	0.799671	0.950703	0.829697	0.877991
FOX_3	-12	3	3.99293	1.87302	12.2919	0	0.6669	0.3331	0.944991	0.803359	-0.530121	0.877991
FOX_3	-11	7	3.5664	1.77353	11.4139	0	0.0557	0.9443	0.570925	0.9977	1.93602	0.877991
FOX_3	-10	3	4.08195	1.91003	15.8038	0	0.6828	0.3172	0.944991	0.803359	-0.566459	0.877991
FOX_3	-9	4	3.95798	1.85474	13.1699	0	0.4681	0.5319	0.799671	0.894073	0.0226543	0.877991
FOX_3	-8	3	3.62645	1.82331	14.0479	0	0.5868	0.4132	0.944991	0.894073	-0.34358	0.877991
FOX_3	-7	2	3.10756	1.64693	11.4139	0	0.6865	0.3135	0.944991	0.803359	-0.6725	0.877991
FOX_3	-6	9	4.37573	1.97332	14.0479	0	0.015	0.985	0.2665	0.9977	2.3434	0.877991
FOX_3	-5	5	2.81765	1.58242	11.4139	0	0.1046	0.8954	0.686457	0.9977	1.37912	0.877991
FOX_3	-4	2	2.21684	1.39378	9.6579	0	0.4656	0.5344	0.799671	0.894073	-0.155577	0.877991
FOX_3	-3	1	1.14446	0.999799	6.14594	0	0.3762	0.6238	0.799671	0.894073	-0.14449	0.877991
FOX_3	-2	1	0.199216	0.411663	3.51196	0	0.0195	0.9805	0.2665	0.9977	1.94524	0.877991
FOX_3	-1	3	1.38292	1.09264	7.02393	0	0.0738	0.9262	0.60516	0.9977	1.47998	0.877991
FOX_3	0	1	0.461712	0.700476	4.18028	0	0.3529	0.6471	0.799671	0.894073	0.768459	0.961531
FOX_3	1	4	3.17858	1.82474	12.5409	0	0.3657	0.6343	0.799671	0.894073	0.450155	1.04507
FOX_3	2	1	2.23562	1.52216	12.5409	0	0.88	0.12	0.973135	0.615	-0.811751	1.04507
FOX_3	3	6	5.40187	2.43753	16.7211	0	0.4125	0.5875	0.799671	0.894073	0.245385	1.04507
FOX_3	4	1	1.33915	1.18584	8.36057	0	0.7182	0.2818	0.944991	0.803359	-0.286003	1.04507
FOX_3	5	0	1.19577	1.12233	7.3155	0	0.6804	0	0.944991	0	-1.06543	1.04507
FOX_3	6	1	3.09654	1.79086	12.5409	0	0.9494	0.0506	0.973135	0.47888	-1.17069	1.04507
FOX_3	7	0	0.618577	0.804374	5.22535	0	0.4458	0	0.799671	0	-0.769017	1.04507
FOX_3	8	3	2.59836	1.64786	11.4958	0	0.4533	0.5467	0.799671	0.894073	0.243735	1.04507
FOX_3	9	7	4.2525	2.13131	15.6761	0	0.1172	0.8828	0.686457	0.9977	1.28911	1.04507
FOX_3	10	1	4.25887	2.11491	13.5859	0	0.9815	0.0185	0.9815	0.252833	-1.54091	1.04507
FOX_3	11	6	4.34718	2.11848	14.631	0	0.24	0.76	0.799671	0.950703	0.78019	1.04507
FOX_3	12	3	4.40017	2.16488	15.6761	0	0.7866	0.2134	0.944991	0.779683	-0.646765	1.04507
FOX_3	13	3	3.90313	2.03073	14.631	0	0.7191	0.2809	0.944991	0.803359	-0.444731	1.04507
FOX_3	14	2	4.04568	2.03571	15.6761	0	0.9008	0.0992	0.973135	0.581029	-1.00489	1.04507
FOX_3	15	6	4.54334	2.16245	15.6761	0	0.2716	0.7284	0.799671	0.950703	0.673616	1.04507
FOX_3	16	5	4.39139	2.13185	15.6761	0	0.4116	0.5884	0.799671	0.894073	0.285486	1.04507
FOX_3	17	6	4.98436	2.25646	14.631	0	0.3458	0.6542	0.799671	0.894073	0.450104	1.04507
FOX_3	18	2	4.75079	2.23781	15.6761	0	0.9416	0.0584	0.973135	0.47888	-1.22923	1.04507
FOX_3	19	5	4.35795	2.11355	14.631	0	0.4014	0.5986	0.799671	0.894073	0.30378	1.04507
FOX_3	20	6	4.0183	2.00978	14.631	0	0.1859	0.8141	0.799671	0.981709	0.986028	1.04507
FOX_4	-20	32	24.1148	4.81926	48.6965	8.59349	0.0563	0.9437	0.288538	1	1.63619	0.954833
FOX_4	-19	15	24.9579	4.8988	42.9675	9.54833	0.9864	0.0136	0.9985	0.11152	-2.03272	0.954833
FOX_4	-18	23	25.6179	4.95818	48.6965	8.59349	0.6663	0.3337	0.881235	0.974519	-0.527991	0.954833
FOX_4	-17	30	24.4867	4.80376	42.0126	8.59349	0.1276	0.8724	0.438385	1	1.14771	0.954833
FOX_4	-16	23	25.2633	4.83121	45.832	8.59349	0.6453	0.3547	0.881235	0.974519	-0.468465	0.954833
FOX_4	-15	21	25.7629	4.97833	47.7416	8.59349	0.8561	0.1439	0.943108	0.588536	-0.956729	0.954833
FOX_4	-14	29	23.3177	4.73601	42.9675	8.59349	0.112	0.888	0.438385	1	1.19981	0.954833
FOX_4	-13	19	23.4848	4.73879	41.0578	8.59349	0.8458	0.1542	0.943108	0.588536	-0.946398	0.954833
FOX_4	-12	24	24.1356	4.81724	45.832	7.63866	0.4626	0.5374	0.831985	1	-0.0281475	0.954833
FOX_4	-11	32	26.4805	5.06386	47.7416	8.59349	0.139	0.861	0.438385	1	1.08998	0.954833
FOX_4	-10	29	29.3734	5.29697	50.6061	12.4128	0.5092	0.4908	0.831985	1	-0.0704976	0.954833
FOX_4	-9	23	24.2783	4.8184	43.9223	8.59349	0.5576	0.4424	0.846726	1	-0.265304	0.954833
FOX_4	-8	35	23.1146	4.6915	42.0126	7.63866	0.008	0.992	0.082	1	2.53339	0.954833
FOX_4	-7	42	28.8348	5.3387	52.5158	11.458	0.0124	0.9876	0.10168	1	2.46599	0.954833
FOX_4	-6	56	35.5905	5.78104	58.2448	16.2322	0.0006	0.9994	0.0082	1	3.53041	0.954833
FOX_4	-5	33	23.3293	4.73822	44.8771	8.59349	0.0267	0.9733	0.156386	1	2.04099	0.954833
FOX_4	-4	0	0.16404	0.391949	2.8645	0	0.1591	0	0.465936	0	-0.418525	0.954833
FOX_4	-3	2	2.48763	1.5197	9.54833	0	0.4854	0.5146	0.831985	1	-0.320869	0.954833
FOX_4	-2	0	0.717461	0.832882	5.729	0	0.5276	0	0.831985	0	-0.86142	0.954833
FOX_4	-1	0	1.79824	1.30525	8.59349	0	0.8461	0	0.943108	0	-1.3777	0.954833
FOX_4	0	2	9.85598	2.99202	21.9449	0.914369	0.9985	0.0015	0.9985	0.015375	-2.62565	0.934601
FOX_4	1	100	45.1391	6.32646	72.2351	22.8592	0	1	0	1	8.67165	0.914369
FOX_4	2	63	31.3499	5.34143	54.8621	13.7155	0	1	0	1	5.92541	0.914369
FOX_4	3	19	16.5316	3.87578	32.9173	4.57184	0.2718	0.7282	0.655518	1	0.636876	0.914369
FOX_4	4	21	25.4771	4.84625	46.6328	9.14369	0.8446	0.1554	0.943108	0.588536	-0.923821	0.914369
FOX_4	5	18	19.2934	4.24349	36.5748	5.48621	0.6197	0.3803	0.881235	0.974519	-0.304789	0.914369
FOX_4	6	28	28.1158	5.07325	48.4616	11.8868	0.504	0.496	0.831985	1	-0.0228333	0.914369
FOX_4	7	33	29.0695	5.16266	50.2903	12.8012	0.1979	0.8021	0.507119	1	0.761327	0.914369
FOX_4	8	37	26.2443	4.92514	46.6328	9.14369	0.0198	0.9802	0.1353	1	2.18384	0.914369
FOX_4	9	21	24.2667	4.70131	42.9753	10.0581	0.782	0.218	0.943108	0.744833	-0.694852	0.914369
FOX_4	10	32	26.0993	4.87609	45.7184	9.14369	0.1326	0.8674	0.438385	1	1.21013	0.914369
FOX_4	11	28	26.2651	4.94049	44.8041	10.0581	0.364	0.636	0.7462	1	0.351167	0.914369
FOX_4	12	25	24.411	4.75418	44.8041	8.22932	0.4297	0.5703	0.831985	1	0.123891	0.914369
FOX_4	13	23	25.0448	4.867	48.4616	9.14369	0.6287	0.3713	0.881235	0.974519	-0.420143	0.914369
FOX_4	14	30	25.2507	4.86167	47.5472	5.48621	0.1765	0.8235	0.482433	1	0.976895	0.914369
FOX_4	15	19	25.0932	4.83553	43.8897	8.22932	0.9114	0.0886	0.958138	0.588536	-1.26009	0.914369
FOX_4	16	28	25.3652	4.79096	46.6328	10.0581	0.2963	0.7037	0.674906	1	0.549945	0.914369
FOX_4	17	18	23.0492	4.55803	41.1466	8.22932	0.8741	0.1259	0.943108	0.588536	-1.10777	0.914369
FOX_4	18	30	23.9775	4.70417	42.061	9.14369	0.1095	0.8905	0.438385	1	1.28025	0.914369
FOX_4	19	20	24.3461	4.6983	45.7184	8.22932	0.8421	0.1579	0.943108	0.588536	-0.925032	0.914369
FOX_4	20	26	24.1935	4.65832	42.061	9.14369	0.3323	0.6677	0.717068	1	0.387807	0.914369
FOX_5	-20	16	16.6501	3.85407	36.1503	4.40857	0.5169	0.4831	0.756889	1	-0.168679	0.881713
FOX_5	-19	16	17.6785	3.90111	37.032	4.40857	0.627	0.373	0.779	1	-0.430271	0.881713
FOX_5	-18	16	17.6358	3.97385	34.3868	5.29028	0.6191	0.3809	0.779	1	-0.411633	0.881713
FOX_5	-17	21	17.4632	3.95409	33.5051	5.29028	0.1996	0.8004	0.454644	1	0.894462	0.881713
FOX_5	-16	14	17.3431	3.90396	35.2685	5.29028	0.8246	0.1754	0.939128	1	-0.856342	0.881713
FOX_5	-15	29	18.2727	4.02236	36.1503	6.17199	0.0071	0.9929	0.05822	1	2.66691	0.881713
FOX_5	-14	18	19.0177	4.11744	36.1503	4.40857	0.5761	0.4239	0.772916	1	-0.247163	0.881713
FOX_5	-13	16	17.9461	3.98773	41.4405	5.29028	0.6484	0.3516	0.781894	1	-0.48803	0.881713
FOX_5	-12	11	17.6292	3.93248	35.2685	2.64514	0.9612	0.0388	0.9798	0.3977	-1.68575	0.881713
FOX_5	-11	21	18.3582	4.0369	35.2685	5.29028	0.2675	0.7325	0.522262	1	0.654402	0.881713
FOX_5	-10	20	19.2865	4.17951	36.1503	7.05371	0.4366	0.5634	0.67893	1	0.170711	0.881713
FOX_5	-9	22	19.1489	4.12479	36.1503	5.29028	0.2622	0.7378	0.522262	1	0.691216	0.881713
FOX_5	-8	14	18.5952	4.04206	36.1503	5.29028	0.8935	0.1065	0.978174	0.72775	-1.13684	0.881713
FOX_5	-7	25	18.8848	4.09619	37.032	5.29028	0.066	0.934	0.193286	1	1.4929	0.881713
FOX_5	-6	24	15.77	3.75858	30.86	3.52685	0.0166	0.9834	0.0972286	1	2.18967	0.881713
FOX_5	-5	35	20.5232	4.26624	41.4405	6.17199	0.0012	0.9988	0.0246	1	3.39334	0.881713
FOX_5	-4	18	12.4891	3.31399	29.0965	0.881713	0.0544	0.9456	0.185867	1	1.66291	0.881713
FOX_5	-3	10	5.93764	2.289	15.8708	0	0.0423	0.9577	0.172945	1	1.77474	0.881713
FOX_5	-2	4	2.65272	1.51512	9.69885	0	0.1833	0.8167	0.442076	1	0.889223	0.881713
FOX_5	-1	9	2.09716	1.36631	7.93542	0	0	1	0	1	5.05219	0.881713
FOX_5	0	4	1.83326	1.26985	8.77618	0	0.0613	0.9387	0.193286	1	1.7063	0.879666
FOX_5	1	0	0.73641	0.798051	5.26571	0	0.5677	0	0.772916	0	-0.92276	0.877618
FOX_5	2	12	7.87847	2.63947	21.9405	0.877618	0.0716	0.9284	0.195707	1	1.5615	0.877618
FOX_5	3	24	15.2792	3.63016	29.839	3.51047	0.0116	0.9884	0.0792667	1	2.40231	0.877618
FOX_5	4	20	13.1622	3.41491	32.4719	3.51047	0.0315	0.9685	0.1435	1	2.00235	0.877618
FOX_5	5	16	10.8402	3.07688	24.5733	1.75524	0.0464	0.9536	0.172945	1	1.67697	0.877618
FOX_5	6	16	13.601	3.47117	28.0838	3.51047	0.221	0.779	0.476895	1	0.691127	0.877618
FOX_5	7	18	16.8147	3.85203	31.5943	3.51047	0.3669	0.6331	0.626787	1	0.3077	0.877618
FOX_5	8	29	18.1097	3.95217	35.1047	5.26571	0.004	0.996	0.041	1	2.75552	0.877618
FOX_5	9	20	19.0094	4.08732	35.1047	6.14333	0.4188	0.5812	0.67893	1	0.242362	0.877618
FOX_5	10	23	18.0701	4.00977	35.9824	5.26571	0.1038	0.8962	0.265987	1	1.22948	0.877618
FOX_5	11	21	18.5342	4.056	35.9824	5.26571	0.2926	0.7074	0.5453	1	0.607926	0.877618
FOX_5	12	19	18.469	4.00203	35.1047	6.14333	0.4471	0.5529	0.67893	1	0.132695	0.877618
FOX_5	13	12	18.7511	4.08912	35.9824	5.26571	0.9621	0.0379	0.9798	0.3977	-1.65099	0.877618
FOX_5	14	26	17.6293	3.93318	36.86	5.26571	0.023	0.977	0.117875	1	2.12822	0.877618
FOX_5	15	21	19.0184	4.11794	42.1257	3.51047	0.3355	0.6645	0.598065	1	0.481204	0.877618
FOX_5	16	11	18.8275	4.10768	37.7376	6.14333	0.9798	0.0202	0.9798	0.3977	-1.90559	0.877618
FOX_5	17	32	19.4695	4.16351	37.7376	5.26571	0.0032	0.9968	0.041	1	3.00959	0.877618
FOX_5	18	14	18.8924	4.06729	35.9824	6.14333	0.9066	0.0934	0.978174	0.72775	-1.20287	0.877618
FOX_5	19	17	18.1556	4.01366	33.3495	5.26571	0.5844	0.4156	0.772916	1	-0.287927	0.877618
FOX_5	20	15	17.7829	3.9685	35.9824	4.38809	0.7154	0.2846	0.83804	1	-0.701252	0.877618
FOX_6	-20	2	1.23425	0.964179	6.07482	0	0.2231	0.7769	0.609807	1	0.794198	0.759352
FOX_6	-19	1	1.34709	1.00925	6.07482	0	0.5296	0.4704	0.801696	0.919254	-0.343908	0.759352
FOX_6	-18	1	1.1776	0.939565	6.83417	0	0.4619	0.5381	0.80032	0.919254	-0.189027	0.759352
FOX_6	-17	0	1.32234	0.996951	6.83417	0	0.8234	0	0.888405	0	-1.32638	0.759352
FOX_6	-16	0	1.21701	0.947277	6.07482	0	0.8058	0	0.888405	0	-1.28475	0.759352
FOX_6	-15	1	1.53366	1.08567	7.59352	0	0.5991	0.4009	0.837083	0.913161	-0.491554	0.759352
FOX_6	-14	2	1.42546	1.03754	6.83417	0	0.2898	0.7102	0.705656	1	0.553757	0.759352
FOX_6	-13	3	1.60747	1.10052	8.35287	0	0.1688	0.8312	0.494343	1	1.26533	0.759352
FOX_6	-12	3	1.56016	1.08819	7.59352	0	0.155	0.845	0.488846	1	1.32315	0.759352
FOX_6	-11	1	1.57095	1.08395	6.83417	0	0.6125	0.3875	0.837083	0.913161	-0.526728	0.759352
FOX_6	-10	1	0.853284	0.809739	5.31546	0	0.308	0.692	0.705656	1	0.181189	0.759352
FOX_6	-9	0	1.46813	1.05868	6.83417	0	0.8534	0	0.897164	0	-1.38676	0.759352
FOX_6	-8	2	1.47838	1.05648	7.59352	0	0.3098	0.6902	0.705656	1	0.493734	0.759352
FOX_6	-7	1	1.77863	1.17535	7.59352	0	0.6709	0.3291	0.887319	0.843319	-0.662469	0.759352
FOX_6	-6	2	0.866573	0.808479	6.07482	0	0.108	0.892	0.405217	1	1.40193	0.759352
FOX_6	-5	2	0.917297	0.831154	5.31546	0	0.1186	0.8814	0.405217	1	1.30265	0.759352
FOX_6	-4	1	0.20176	0.398447	3.79676	0	0.0322	0.9678	0.26404	1	2.00338	0.759352
FOX_6	-3	0	1.01692	0.874435	5.31546	0	0.7392	0	0.888405	0	-1.16295	0.759352
FOX_6	-2	0	0.0180726	0.117236	1.5187	0	0.0235	0	0.240875	0	-0.154156	0.759352
FOX_6	-1	0	0.00372083	0.0530269	0.759352	0	0.0049	0	0.10045	0	-0.0701686	0.759352
FOX_6	0	1	0.0768471	0.30778	2.44736	0	0.0606	0.9394	0.325437	1	2.99939	0.991516
FOX_6	1	0	0.0794168	0.308344	2.44736	0	0.0635	0	0.325437	0	-0.257559	1.22368
FOX_6	2	0	0.00513945	0.0791407	1.22368	0	0.0042	0	0.10045	0	-0.0649407	1.22368
FOX_6	3	0	0	0	0	0	1	1	1	1	0	1.22368
FOX_6	4	0	0.739959	0.951719	6.1184	0	0.4535	0	0.80032	0	-0.777497	1.22368
FOX_6	5	0	0.586265	0.849741	6.1184	0	0.3792	0	0.77736	0	-0.689934	1.22368
FOX_6	6	7	2.49043	1.74483	13.4605	0	0.0154	0.9846	0.210467	1	2.58453	1.22368
FOX_6	7	2	2.22232	1.63766	11.0131	0	0.5475	0.4525	0.801696	0.919254	-0.135758	1.22368
FOX_6	8	3	3.19943	2.00143	13.4605	0	0.488	0.512	0.80032	0.919254	-0.0996449	1.22368
FOX_6	9	0	1.76222	1.47287	9.78944	0	0.766	0	0.888405	0	-1.19645	1.22368
FOX_6	10	0	1.95948	1.54586	11.0131	0	0.8016	0	0.888405	0	-1.26756	1.22368
FOX_6	11	2	1.96645	1.54722	9.78944	0	0.4814	0.5186	0.80032	0.919254	0.0216821	1.22368
FOX_6	12	3	2.53571	1.75435	13.4605	0	0.3485	0.6515	0.752026	1	0.264652	1.22368
FOX_6	13	4	2.12308	1.60192	9.78944	0	0.0958	0.9042	0.405217	1	1.17167	1.22368
FOX_6	14	0	1.91151	1.54412	11.0131	0	0.7835	0	0.888405	0	-1.23793	1.22368
FOX_6	15	4	1.81227	1.47938	11.0131	0	0.0613	0.9387	0.325437	1	1.47882	1.22368
FOX_6	16	0	2.63727	1.77679	11.0131	0	0.8848	0	0.90692	0	-1.48429	1.22368
FOX_6	17	2	2.16432	1.63359	11.0131	0	0.5282	0.4718	0.801696	0.919254	-0.100589	1.22368
FOX_6	18	2	1.72123	1.43469	8.56576	0	0.4147	0.5853	0.80032	0.959892	0.194309	1.22368
FOX_6	19	0	1.84262	1.50145	9.78944	0	0.7826	0	0.888405	0	-1.22723	1.22368
FOX_6	20	4	2.24643	1.6731	9.78944	0	0.1152	0.8848	0.405217	1	1.0481	1.22368
FOX_7	-20	24	20.8861	4.27913	38.9761	6.20075	0.2028	0.7972	0.743662	0.994191	0.7277	0.885821
FOX_7	-19	17	21.4123	4.38592	39.862	6.20075	0.8285	0.1715	1	0.663082	-1.00602	0.885821
FOX_7	-18	24	23.0855	4.5513	43.4052	8.85821	0.3809	0.6191	0.743662	0.994191	0.200936	0.885821
FOX_7	-17	25	22.8225	4.49632	42.5194	7.08657	0.2861	0.7139	0.743662	0.994191	0.484289	0.885821
FOX_7	-16	20	21.5669	4.3705	37.2045	6.20075	0.6375	0.3625	0.90921	0.966575	-0.358521	0.885821
FOX_7	-15	28	21.0608	4.30034	38.9761	4.42911	0.0601	0.9399	0.410683	0.9994	1.61363	0.885821
FOX_7	-14	16	22.1786	4.44677	45.1769	6.20075	0.9073	0.0927	1	0.475087	-1.38945	0.885821
FOX_7	-13	26	23.6855	4.58373	41.6336	9.74404	0.284	0.716	0.743662	0.994191	0.50493	0.885821
FOX_7	-12	25	23.9236	4.6473	42.5194	7.97239	0.376	0.624	0.743662	0.994191	0.231609	0.885821
FOX_7	-11	16	24.23	4.62748	40.7478	7.97239	0.9631	0.0369	1	0.43788	-1.77852	0.885821
FOX_7	-10	26	22.1446	4.49054	40.7478	6.20075	0.1847	0.8153	0.743662	0.994191	0.858549	0.885821
FOX_7	-9	27	23.3587	4.5914	40.7478	7.97239	0.2122	0.7878	0.743662	0.994191	0.793077	0.885821
FOX_7	-8	26	24.1517	4.63521	44.2911	7.08657	0.3206	0.6794	0.743662	0.994191	0.398762	0.885821
FOX_7	-7	41	24.8406	4.7223	42.5194	8.85821	0.0006	0.9994	0.0246	0.9994	3.42194	0.885821
FOX_7	-6	33	23.1537	4.48523	40.7478	9.74404	0.0162	0.9838	0.16605	0.9994	2.19527	0.885821
FOX_7	-5	24	17.8053	3.93083	34.547	6.20075	0.0519	0.9481	0.410683	0.9994	1.57593	0.885821
FOX_7	-4	10	11.4572	3.17894	24.803	1.77164	0.6431	0.3569	0.90921	0.966575	-0.458396	0.885821
FOX_7	-3	11	14.5331	3.62496	30.1179	3.54329	0.8296	0.1704	1	0.663082	-0.974646	0.885821
FOX_7	-2	118	108.987	9.70516	150.59	73.5232	0.17	0.83	0.743662	0.994191	0.928714	0.885821
FOX_7	-1	85	63.4658	7.61996	93.8971	38.0903	0.004	0.996	0.0546667	0.9994	2.82602	0.885821
FOX_7	0	28	75.3753	8.73872	111.304	43.2848	1	0	1	0	-5.42131	0.958206
FOX_7	1	30	44.9487	6.85157	74.2025	20.6118	0.9871	0.0129	1	0.26445	-2.18179	1.03059
FOX_7	2	1	2.56153	1.61945	10.3059	0	0.918	0.082	1	0.475087	-0.964237	1.03059
FOX_7	3	10	11.0983	3.39438	27.8259	1.03059	0.6333	0.3667	0.90921	0.966575	-0.323572	1.03059
FOX_7	4	16	23.2156	4.95117	41.2236	6.18354	0.935	0.065	1	0.444167	-1.45735	1.03059
FOX_7	5	31	32.0015	5.86088	52.5601	9.27532	0.5244	0.4756	0.860016	0.994191	-0.170877	1.03059
FOX_7	6	23	32.152	5.77338	56.6825	11.3365	0.9466	0.0534	1	0.43788	-1.5852	1.03059
FOX_7	7	30	30.8488	5.70846	59.7743	12.3671	0.5169	0.4831	0.860016	0.994191	-0.148687	1.03059
FOX_7	8	24	28.6258	5.4118	52.5601	10.3059	0.7893	0.2107	1	0.719892	-0.85476	1.03059
FOX_7	9	31	29.81	5.46701	53.5907	10.3059	0.3755	0.6245	0.743662	0.994191	0.217662	1.03059
FOX_7	10	46	29.8425	5.5136	52.5601	9.27532	0.0027	0.9973	0.0546667	0.9994	2.93048	1.03059
FOX_7	11	28	27.7298	5.32456	51.5295	8.24473	0.4419	0.5581	0.816791	0.994191	0.0507472	1.03059
FOX_7	12	31	27.8105	5.36783	53.5907	10.3059	0.2408	0.7592	0.743662	0.994191	0.59419	1.03059
FOX_7	13	34	27.8485	5.44985	50.4989	11.3365	0.1513	0.8487	0.743662	0.994191	1.12874	1.03059
FOX_7	14	29	27.4047	5.33947	51.5295	10.3059	0.346	0.654	0.743662	0.994191	0.298767	1.03059
FOX_7	15	22	27.0542	5.28563	52.5601	9.27532	0.8221	0.1779	1	0.663082	-0.956224	1.03059
FOX_7	16	19	27.2554	5.27217	51.5295	9.27532	0.9471	0.0529	1	0.43788	-1.56585	1.03059
FOX_7	17	25	27.0402	5.32112	49.4684	6.18354	0.6228	0.3772	0.90921	0.966575	-0.38342	1.03059
FOX_7	18	28	26.3584	5.22285	48.4378	10.3059	0.3387	0.6613	0.743662	0.994191	0.314314	1.03059
FOX_7	19	26	25.9292	5.22581	48.4378	9.27532	0.4582	0.5418	0.816791	0.994191	0.0135389	1.03059
FOX_7	20	30	27.5631	5.37983	50.4989	11.3365	0.2915	0.7085	0.743662	0.994191	0.452961	1.03059
FOX_8	-20	9	11.5864	3.66491	27.4123	0	0.7895	0.2105	0.987397	0.64124	-0.705711	1.14218
FOX_8	-19	7	11.8382	3.67556	28.5544	1.14218	0.8913	0.1087	0.993197	0.636671	-1.31632	1.14218
FOX_8	-18	12	11.2208	3.59948	27.4123	0	0.3942	0.6058	0.987397	0.856476	0.216489	1.14218
FOX_8	-17	9	11.312	3.64566	29.6966	1.14218	0.7672	0.2328	0.987397	0.64124	-0.634183	1.14218
FOX_8	-16	5	11.8286	3.66291	28.5544	0	0.9786	0.0214	1	0.21935	-1.86426	1.14218
FOX_8	-15	11	11.5419	3.6197	27.4123	1.14218	0.5558	0.4442	0.987397	0.821476	-0.149718	1.14218
FOX_8	-14	12	11.7584	3.73817	28.5544	0	0.456	0.544	0.987397	0.826074	0.0646369	1.14218
FOX_8	-13	10	11	3.57261	26.2701	1.14218	0.6209	0.3791	0.987397	0.777155	-0.279899	1.14218
FOX_8	-12	23	12.1972	3.73938	28.5544	0	0.0042	0.9958	0.1722	0.9958	2.88893	1.14218
FOX_8	-11	16	13.9173	3.95628	29.6966	1.14218	0.2445	0.7555	0.987397	0.885014	0.526424	1.14218
FOX_8	-10	17	12.7938	3.86378	30.8388	1.14218	0.1647	0.8353	0.987397	0.937821	1.08863	1.14218
FOX_8	-9	10	11.357	3.61338	29.6966	0	0.6629	0.3371	0.987397	0.727426	-0.375553	1.14218
FOX_8	-8	15	13.0306	3.90043	31.981	0	0.2581	0.7419	0.987397	0.885014	0.504906	1.14218
FOX_8	-7	12	10.8768	3.53065	27.4123	0	0.3555	0.6445	0.987397	0.880817	0.318116	1.14218
FOX_8	-6	4	13.4285	3.97655	33.1232	1.14218	0.9966	0.0034	1	0.0464667	-2.37102	1.14218
FOX_8	-5	12	15.1099	4.16215	31.981	2.28436	0.7654	0.2346	0.987397	0.64124	-0.747178	1.14218
FOX_8	-4	6	6.65261	2.79969	19.417	0	0.5247	0.4753	0.987397	0.821476	-0.233102	1.14218
FOX_8	-3	29	20.9879	4.88634	39.9762	5.71089	0.0528	0.9472	0.978533	0.97088	1.6397	1.14218
FOX_8	-2	29	69.4885	8.88501	103.938	35.4075	1	0	1	0	-4.55694	1.14218
FOX_8	-1	0	0.459155	0.720963	5.71089	0	0.3327	0	0.987397	0	-0.636864	1.14218
FOX_8	0	3	5.94918	2.59602	18.0234	0	0.8963	0.1037	0.993197	0.636671	-1.13604	1.13432
FOX_8	1	4	4.21984	2.20707	14.644	0	0.5083	0.4917	0.987397	0.821476	-0.0996067	1.12646
FOX_8	2	9	5.54681	2.53428	19.1499	0	0.1316	0.8684	0.987397	0.937821	1.36259	1.12646
FOX_8	3	5	5.81254	2.54723	18.0234	0	0.5856	0.4144	0.987397	0.809067	-0.318991	1.12646
FOX_8	4	5	4.75142	2.31347	14.644	0	0.4167	0.5833	0.987397	0.854118	0.107451	1.12646
FOX_8	5	5	5.00566	2.3764	15.7705	0	0.4577	0.5423	0.987397	0.826074	-0.00238103	1.12646
FOX_8	6	20	24.08	5.2601	45.0585	7.88523	0.7958	0.2042	0.987397	0.64124	-0.775657	1.12646
FOX_8	7	13	13.1657	3.85562	30.4145	1.12646	0.4991	0.5009	0.987397	0.821476	-0.0429886	1.12646
FOX_8	8	9	12.2194	3.7279	27.0351	1.12646	0.8429	0.1571	0.987397	0.64124	-0.863597	1.12646
FOX_8	9	11	12.6982	3.74897	28.1615	1.12646	0.6884	0.3116	0.987397	0.709756	-0.452965	1.12646
FOX_8	10	9	11.9316	3.69606	27.0351	0	0.8292	0.1708	0.987397	0.64124	-0.793167	1.12646
FOX_8	11	6	11.9467	3.64395	29.288	1.12646	0.9548	0.0452	1	0.37064	-1.63194	1.12646
FOX_8	12	17	11.8865	3.67716	29.288	1.12646	0.0716	0.9284	0.978533	0.97088	1.3906	1.12646
FOX_8	13	10	11.7579	3.66071	27.0351	1.12646	0.7108	0.2892	0.987397	0.697482	-0.480207	1.12646
FOX_8	14	14	11.7438	3.62634	28.1615	1.12646	0.254	0.746	0.987397	0.885014	0.622165	1.12646
FOX_8	15	8	11.3885	3.611	27.0351	0	0.7815	0.2185	0.987397	0.64124	-0.938392	1.12646
FOX_8	16	15	11.0809	3.60783	25.9086	1.12646	0.1308	0.8692	0.987397	0.937821	1.08628	1.12646
FOX_8	17	14	12.07	3.74915	28.1615	0	0.2849	0.7151	0.987397	0.885014	0.514773	1.12646
FOX_8	18	14	11.8958	3.65582	28.1615	1.12646	0.263	0.737	0.987397	0.885014	0.575583	1.12646
FOX_8	19	10	12.1038	3.6416	27.0351	1.12646	0.7459	0.2541	0.987397	0.651131	-0.577723	1.12646
FOX_8	20	9	11.1212	3.53459	25.9086	0	0.771	0.229	0.987397	0.64124	-0.600131	1.12646
FOX_9	-20	6	5.48031	2.4226	15.7402	0	0.4201	0.5799	0.883345	0.909614	0.214516	1.04935
FOX_9	-19	2	5.23078	2.32951	16.7895	0	0.9578	0.0422	0.9956	0.247171	-1.38689	1.04935
FOX_9	-18	5	5.3653	2.41376	16.7895	0	0.578	0.422	0.912478	0.848895	-0.151342	1.04935
FOX_9	-17	12	5.21283	2.34062	15.7402	0	0.0053	0.9947	0.1681	0.9947	2.89973	1.04935
FOX_9	-16	7	5.8352	2.44996	17.8389	0	0.3192	0.6808	0.883345	0.96251	0.475436	1.04935
FOX_9	-15	5	5.75377	2.43694	18.8882	0	0.6428	0.3572	0.926472	0.848895	-0.309311	1.04935
FOX_9	-14	8	5.14767	2.33365	15.7402	0	0.1224	0.8776	0.5576	0.9947	1.22226	1.04935
FOX_9	-13	3	6.64383	2.66352	17.8389	0	0.9485	0.0515	0.9956	0.263937	-1.36805	1.04935
FOX_9	-12	4	6.13154	2.53555	17.8389	0	0.8384	0.1616	0.976939	0.602327	-0.840659	1.04935
FOX_9	-11	4	5.19311	2.35699	16.7895	0	0.7231	0.2769	0.926472	0.784381	-0.5062	1.04935
FOX_9	-10	5	6.2329	2.55377	18.8882	0	0.7106	0.2894	0.926472	0.784381	-0.482779	1.04935
FOX_9	-9	6	6.04045	2.50111	16.7895	0	0.5151	0.4849	0.912478	0.864387	-0.0161742	1.04935
FOX_9	-8	4	6.33112	2.54342	17.8389	0	0.8578	0.1422	0.976939	0.58302	-0.916531	1.04935
FOX_9	-7	5	6.17582	2.58375	18.8882	0	0.6939	0.3061	0.926472	0.784381	-0.455082	1.04935
FOX_9	-6	6	12.5311	3.6247	27.283	1.04935	0.9796	0.0204	0.9956	0.1394	-1.80183	1.04935
FOX_9	-5	7	8.61114	2.97602	24.135	0	0.7158	0.2842	0.926472	0.784381	-0.541375	1.04935
FOX_9	-4	1	0.522889	0.738911	5.24673	0	0.3942	0.6058	0.883345	0.909614	0.645695	1.04935
FOX_9	-3	0	0.653113	0.820961	6.29607	0	0.4656	0	0.909029	0	-0.795547	1.04935
FOX_9	-2	5	13.5043	3.74813	31.4804	2.09869	0.9956	0.0044	0.9956	0.03608	-2.26896	1.04935
FOX_9	-1	0	0.592461	0.793269	5.24673	0	0.4309	0	0.883345	0	-0.746859	1.04935
FOX_9	0	0	1.15506	0.920904	5.88454	0	0.794	0	0.957471	0	-1.25427	0.892456
FOX_9	1	0	0.195734	0.379454	2.94227	0	0.2335	0	0.767962	0	-0.515832	0.735567
FOX_9	2	3	1.81281	1.16536	7.35567	0	0.1028	0.8972	0.5576	0.9947	1.01874	0.735567
FOX_9	3	4	1.91909	1.2083	8.82681	0	0.0541	0.9459	0.390867	0.9947	1.72218	0.735567
FOX_9	4	9	4.48159	1.81521	14.7113	0	0.0082	0.9918	0.1681	0.9947	2.48919	0.735567
FOX_9	5	3	3.70807	1.65999	11.7691	0	0.5652	0.4348	0.912478	0.848895	-0.426549	0.735567
FOX_9	6	5	6.65968	2.25596	16.1825	0	0.7895	0.2105	0.957471	0.719208	-0.735688	0.735567
FOX_9	7	5	3.51204	1.59993	10.2979	0	0.2022	0.7978	0.767962	0.9947	0.930014	0.735567
FOX_9	8	7	4.11101	1.74304	11.0335	0	0.0572	0.9428	0.390867	0.9947	1.65744	0.735567
FOX_9	9	6	4.08262	1.74623	11.7691	0	0.1123	0.8877	0.5576	0.9947	1.09801	0.735567
FOX_9	10	8	3.95485	1.69836	12.5046	0	0.0205	0.9795	0.280167	0.9947	2.38179	0.735567
[truncated: 9,399 more rows]
