# Supplementary material for: High-throughput characterization of transcription factors that modulate UVdamage formation and repair at single-nucleotide resolution
Source: Research Square preprint supplement (doi:10.21203/rs.3.rs-8197218/v1), 2025-12-10
Supplement: Supplementary file 4 [file 6f6f1c296cb06dcbc6de8734.xlsx]

## Sheet: TOC
Supplementary data for analysis results discussed in the paper "High-throughput characterization of transcription factors that modulate UV damage formation and repair at single-nucleotide resolution", Wasserman et al. Included are results from high-throughput analyses of CPD formation, 6-4 PP formation, and CPD repair across 225 TF motif clusters curated from Vierstra et al. (2020).
Table of Contents
#	Dataset	Cellular context	Assay	Experimental conditions		GEOS accession		Analysis Description
				Irradiation (UVC)	Repair time (hr)	Series	Sample
1	CPD_formation_cellDNA	Human skin fibroblast (C1SAN/CSB^WT)	CPD-seq v2.0	6 J/m2	0	GSE235483	GSM7503613	CPD formation analysis in TF binding sites from CPD-seq v2.0 experiments of UV irradiated cellular DNA
2	CPD_formation_nakedDNA	Naked, protein purified	CPD-seq v2.0	12 J/m2	0	GSE235483	GSM7503618	CPD formation analysis in TF binding sites from CPD-seq v2.0 experiments of UV irradiated naked DNA
3	64PP_formation_cellDNA	Human skin fibroblast (NHF1)	UVDE-seq	500 J/m2	0	GSE297236	GSM8986610	6-4 PP formation analysis in TF binding sites from UVDE-seq experiments of UV irradiated cellular DNA (rep1 only, no reseq)
4	64PP_formation_nakedDNA	Naked, protein purified	UVDE-seq	400 J/m2	0	GSE297236	GSM8986612	6-4 PP formation analysis in TF binding sites from UVDE-seq experiments of UV irradiated naked DNA
5	CPD_repair_6hr	Human skin fibroblast (C1SAN/CSB^WT)	CPD-seq v2.0	6 J/m2	6	GSE235483	GSM7503614	CPD repair analysis in TF binding sites from CPD-seq v2.0 experiments of UV irradiated cellular DNA after 6hr of repair time
Column Name		Content
TF_cluster		TF motif cluster name from Vierstra et al. (2020)
strand		Strand relative to TF motif cluster (same=motif, opp=motif-complement)
position		Position relative to the TF motif center
observed_count		Observed damage signal at aggregated TF binding site window position
predicted_count		Predicted damage signal per background model of damage formation
predicted_var		Variance of predicted damage signal
predicted_std_dev		Standard deviation of predicted damage signal
pval		P-value of observed signal
qval		Benjamini-Hochberg corrected p-value
zscore		Z-score of observed signal
scaling_factor		Factor for scaling predicted signal to immediate flanking regions around the TF cluster. Briefly, predicted signal for each strand was scaled by multiplying the average ratio of observed-to-predicted signal in immediate flanking regions
predicted_count_raw		Unscaled predicted damage signal
predicted_var_raw		Variance of unscaled predicted damage signal
predicted_std_dev		Standard deviation of unscaled predicted damage signal
observed_count_0hr		Observed damage signal at aggregated TF binding site window position at 0hr of repair
observed_count_6hr		Observed damage signal at aggregated TF binding site window position at 6hr of repair
simulation_mean		Mean of bootstrap simulation for damage signal at 6hr of repair
simulation_var		Variance of bootstrap simulation for damage signal at 6hr of repair
simulation_std_dev		Standard deviation of bootstrap simulation for damage signal at 6hr of repair
pval_emp		Empirical one-sided p-value from bootstrap simulation for damage signal at 6hr of repair
simulation_mean_raw		Mean of unscaled bootstrap simulation for damage signal at 6hr of repair predicted damage signal
simulation_var_raw		Variance of unscaled bootstrap simulation for damage signal at 6hr of repair predicted damage signal
simulation_std_dev_raw		Standard deviation of unscaled bootstrap simulation for damage signal at 6hr of repair predicted damage signal
pval_emp_raw		Empirical one-sided p-value from unscaled bootstrap simulation for damage signal at 6hr of repair

## Sheet: 1_CPD_formation_cellDNA
TF_cluster	strand	position	observed_count	predicted_count	predicted_var	predicted_std_dev	pval	qval	zscore	scaling_factor	predicted_count_raw	predicted_var_raw	predicted_std_dev_raw
AP1/1	same	-41.5	194	179.053	184.986	13.6009	0.124938	0.45025	1.09896	1.03576	172.871	178.598	13.148
AP1/1	opp	-41.5	170	176.654	182.663	13.5153	0.325241	0.478132	-0.492303	1.01221	174.522	180.46	13.2107
AP1/1	opp	-40.5	191	178.449	184.609	13.5871	0.164102	0.467915	0.923723	1.01221	176.297	182.382	13.2777
AP1/1	same	-40.5	184	175.82	181.662	13.4782	0.254057	0.471472	0.606872	1.03576	169.75	175.389	13.0288
AP1/1	opp	-39.5	182	177.31	183.208	13.5354	0.344463	0.482698	0.346462	1.01221	175.171	180.998	13.2352
AP1/1	same	-39.5	176	177.833	183.957	13.5631	0.465126	0.509564	-0.135113	1.03576	171.692	177.606	13.1031
AP1/1	same	-38.5	169	178.107	183.909	13.5613	0.26186	0.471472	-0.671536	1.03576	171.957	177.559	13.1132
AP1/1	opp	-38.5	168	169.008	174.412	13.2065	0.489516	0.526221	-0.0763484	1.01221	166.969	172.308	12.9217
AP1/1	opp	-37.5	193	168.13	173.414	13.1687	0.0272518	0.217243	1.88859	1.01221	166.101	171.322	12.888
AP1/1	same	-37.5	173	172.433	178.182	13.3485	0.462609	0.509564	0.0424807	1.03576	166.479	172.03	12.9027
AP1/1	same	-36.5	177	179.482	185.948	13.6363	0.446008	0.508497	-0.182023	1.03576	173.285	179.528	13.1638
AP1/1	opp	-36.5	172	173.862	179.735	13.4065	0.463834	0.509564	-0.138902	1.01221	171.765	177.567	13.1059
AP1/1	opp	-35.5	175	169.423	174.592	13.2133	0.316741	0.477097	0.422042	1.01221	167.38	172.486	12.9375
AP1/1	same	-35.5	170	174.064	179.928	13.4137	0.398066	0.501183	-0.302949	1.03576	168.053	173.716	12.9635
AP1/1	opp	-34.5	142	165.705	171.104	13.0807	0.0333173	0.249155	-1.81223	1.01221	163.706	169.04	12.7948
AP1/1	same	-34.5	162	173.081	178.694	13.3676	0.211887	0.467915	-0.828961	1.03576	167.105	172.524	12.9269
AP1/1	same	-33.5	176	183.365	189.371	13.7612	0.309325	0.475035	-0.535174	1.03576	177.033	182.833	13.3054
AP1/1	opp	-33.5	163	166.688	172.218	13.1232	0.407211	0.501183	-0.280996	1.01221	164.677	170.14	12.8326
AP1/1	opp	-32.5	143	171.06	176.789	13.2962	0.0155878	0.178741	-2.11037	1.01221	168.996	174.656	12.9999
AP1/1	same	-32.5	186	176.034	181.871	13.4859	0.213697	0.467915	0.739002	1.03576	169.956	175.591	13.0367
AP1/1	opp	-31.5	179	172.795	178.405	13.3568	0.301725	0.471472	0.464568	1.01221	170.71	176.252	13.0656
AP1/1	same	-31.5	163	170.335	175.925	13.2637	0.303484	0.471472	-0.553021	1.03576	164.454	169.85	12.8239
AP1/1	same	-30.5	132	172.907	178.684	13.3673	0.000704533	0.0173114	-3.06023	1.03576	166.937	172.514	12.9204
AP1/1	opp	-30.5	192	174.434	180.19	13.4235	0.087293	0.417066	1.30857	1.01221	172.33	178.016	13.1275
AP1/1	opp	-29.5	179	170.923	176.31	13.2782	0.253569	0.471472	0.608267	1.01221	168.861	174.183	12.9947
AP1/1	same	-29.5	171	179.464	185.138	13.6065	0.278787	0.471472	-0.622079	1.03576	173.268	178.745	13.1631
AP1/1	opp	-28.5	181	172.157	178.013	13.3422	0.236268	0.471472	0.662774	1.01221	170.08	175.866	13.0415
AP1/1	same	-28.5	171	176.383	182.138	13.4958	0.360624	0.492281	-0.398884	1.03576	170.293	175.849	13.0496
AP1/1	opp	-27.5	189	175.43	181.125	13.4583	0.144347	0.45025	1.00832	1.01221	173.313	178.94	13.1649
AP1/1	same	-27.5	180	184.848	191.326	13.8321	0.378759	0.495159	-0.350478	1.03576	178.465	184.72	13.3591
AP1/1	same	-26.5	167	175.567	181.302	13.4649	0.273948	0.471472	-0.636273	1.03576	169.505	175.042	13.0194
AP1/1	opp	-26.5	179	173.398	179.278	13.3895	0.317992	0.477097	0.418401	1.01221	171.306	177.116	13.0884
AP1/1	opp	-25.5	146	172.131	177.375	13.3182	0.0231667	0.217243	-1.96207	1.01221	170.055	175.236	13.0405
AP1/1	same	-25.5	187	179.216	185.579	13.6227	0.265489	0.471472	0.571422	1.03576	173.028	179.171	13.154
AP1/1	opp	-24.5	181	167.306	172.746	13.1433	0.136742	0.45025	1.04189	1.01221	165.288	170.662	12.8564
AP1/1	same	-24.5	171	174.839	180.453	13.4333	0.404891	0.501183	-0.285811	1.03576	168.802	174.223	12.9924
AP1/1	same	-23.5	154	174.287	180.249	13.4257	0.064798	0.359524	-1.51104	1.03576	168.269	174.025	12.9718
AP1/1	opp	-23.5	171	174.137	179.959	13.4149	0.425578	0.507037	-0.233821	1.01221	172.036	177.788	13.1162
AP1/1	opp	-22.5	162	175.359	181.174	13.4601	0.16588	0.467915	-0.99252	1.01221	173.244	178.988	13.1622
AP1/1	same	-22.5	164	176.189	181.817	13.484	0.189986	0.467915	-0.903983	1.03576	170.106	175.539	13.0425
AP1/1	same	-21.5	160	176.408	182.306	13.5021	0.114357	0.45025	-1.21522	1.03576	170.317	176.011	13.0505
AP1/1	opp	-21.5	160	174.48	180.063	13.4188	0.144526	0.45025	-1.0791	1.01221	172.375	177.891	13.1292
AP1/1	same	-20.5	189	171.117	176.635	13.2904	0.0817031	0.401512	1.34553	1.03576	165.209	170.536	12.8534
AP1/1	opp	-20.5	168	176.131	182.224	13.499	0.285512	0.471472	-0.602321	1.01221	174.006	180.025	13.1911
AP1/1	opp	-19.5	165	178.206	184.053	13.5666	0.17084	0.467915	-0.973453	1.01221	176.057	181.833	13.2686
AP1/1	same	-19.5	175	173.851	179.704	13.4054	0.445314	0.508497	0.0857264	1.03576	167.848	173.499	12.9556
AP1/1	opp	-18.5	188	176.684	182.765	13.5191	0.186271	0.467915	0.837054	1.01221	174.552	180.56	13.2118
AP1/1	same	-18.5	166	169.211	174.797	13.2211	0.422263	0.507037	-0.242864	1.03576	163.368	168.762	12.7816
AP1/1	opp	-17.5	163	175.669	181.163	13.4597	0.179753	0.467915	-0.941243	1.01221	173.55	178.978	13.1738
AP1/1	same	-17.5	157	166.358	171.63	13.1008	0.24827	0.471472	-0.714294	1.03576	160.614	165.704	12.6733
AP1/1	same	-16.5	155	169.68	175.295	13.2399	0.137564	0.45025	-1.10879	1.03576	163.821	169.243	12.7993
AP1/1	opp	-16.5	185	177.849	183.707	13.5538	0.280253	0.471472	0.527602	1.01221	175.703	181.491	13.2553
AP1/1	same	-15.5	174	160.736	166.129	12.8891	0.139267	0.45025	1.02905	1.03576	155.186	160.393	12.4574
AP1/1	opp	-15.5	183	177.838	183.399	13.5425	0.331845	0.479642	0.381199	1.01221	175.692	181.186	13.2549
AP1/1	same	-14.5	171	159.881	164.797	12.8373	0.178484	0.467915	0.866172	1.03576	154.36	159.106	12.4242
AP1/1	opp	-14.5	173	166.009	171.325	13.0891	0.277609	0.471472	0.534111	1.01221	164.006	169.258	12.8065
AP1/1	same	-13.5	191	169.85	175.662	13.2537	0.0504781	0.317367	1.5958	1.03576	163.985	169.596	12.8057
AP1/1	opp	-13.5	157	162.826	168.039	12.963	0.342168	0.482698	-0.449436	1.01221	160.862	166.011	12.6831
AP1/1	opp	-12.5	178	173.445	179.293	13.39	0.346558	0.482698	0.340215	1.01221	171.352	177.13	13.0902
AP1/1	same	-12.5	173	171.564	177.69	13.3301	0.43634	0.508497	0.107742	1.03576	165.64	171.555	12.8701
AP1/1	same	-11.5	194	178.306	183.646	13.5516	0.113646	0.45025	1.15809	1.03576	172.149	177.305	13.1206
AP1/1	opp	-11.5	176	163.84	168.983	12.9993	0.161195	0.467915	0.935406	1.01221	161.864	166.944	12.7226
AP1/1	opp	-10.5	193	168.044	173.646	13.1775	0.0268266	0.217243	1.89387	1.01221	166.016	171.552	12.8847
AP1/1	same	-10.5	165	176.661	182.375	13.5046	0.201547	0.467915	-0.863477	1.03576	170.561	176.077	13.0599
AP1/1	same	-9.5	171	164.901	170.057	13.0406	0.300354	0.471472	0.46766	1.03576	159.208	164.185	12.6177
AP1/1	opp	-9.5	185	186.484	193.211	13.9	0.47612	0.518308	-0.106759	1.01221	184.234	190.88	13.5733
AP1/1	opp	-8.5	206	194.731	201.615	14.1991	0.198517	0.467915	0.793648	1.01221	192.382	199.182	13.8702
AP1/1	same	-8.5	149	152.373	157.268	12.5407	0.412954	0.501183	-0.26899	1.03576	147.112	151.838	12.129
AP1/1	opp	-7.5	234	213.289	220.994	14.8659	0.07487	0.387354	1.39316	1.01221	210.716	218.328	14.5161
AP1/1	same	-7.5	150	145.318	150.303	12.2598	0.329579	0.479642	0.381867	1.03576	140.301	145.113	11.8449
AP1/1	opp	-6.5	242	205.344	212.077	14.5629	0.00568097	0.0814272	2.51706	1.01221	202.867	209.519	14.2431
AP1/1	same	-6.5	141	138.84	142.592	11.9412	0.4055	0.501183	0.180879	1.03576	134.046	137.669	11.5778
AP1/1	opp	-5.5	238	179.858	185.408	13.6165	1.49467e-05	0.000642709	4.26994	1.01221	177.689	183.171	13.33
AP1/1	same	-5.5	115	156.8	162.304	12.7399	0.000282714	0.00969102	-3.28103	1.03576	151.386	156.7	12.3039
AP1/1	same	-4.5	63	94.756	97.1963	9.85882	0.000338059	0.00969102	-3.22107	1.03576	91.4842	93.8402	9.56474
AP1/1	opp	-4.5	240	258.614	267.239	16.3475	0.129358	0.45025	-1.13863	1.01221	255.494	264.015	15.9842
AP1/1	same	-3.5	99	90.6516	91.4951	9.56531	0.175652	0.467915	0.87278	1.03576	87.5215	88.3359	9.35529
AP1/1	opp	-3.5	0	0	0	0	1	1	0	1.01221	0	0	0
AP1/1	same	-2.5	11	13.6185	13.8917	3.72716	0.293532	0.471472	-0.702535	1.03576	13.1482	13.412	3.62605
AP1/1	opp	-2.5	0	0	0	0	1	1	0	1.01221	0	0	0
AP1/1	opp	-1.5	368	503.293	515.813	22.7115	1.4498e-10	1.24683e-08	-5.95702	1.01221	497.221	509.591	22.2985
AP1/1	same	-1.5	0	0	0	0	1	1	0	1.03576	0	0	0
AP1/1	opp	-0.5	122	132.301	131.865	11.4832	0.19814	0.467915	-0.897064	1.01221	130.705	130.274	11.4326
AP1/1	same	-0.5	0	0	0	0	1	1	0	1.03576	0	0	0
AP1/1	same	0.5	88	96.1641	95.166	9.75531	0.219159	0.467915	-0.836891	1.02292	93.4227	92.4531	9.66554
AP1/1	opp	0.5	0	0	0	0	1	1	0	1.0406	0	0	0
AP1/1	same	1.5	331	466.213	478.496	21.8745	2.43864e-11	4.19446e-09	-6.18129	1.02292	455.765	467.772	21.3486
AP1/1	opp	1.5	0	0	0	0	1	1	0	1.0406	0	0	0
AP1/1	opp	2.5	2	2.44411	2.54241	1.59449	0.558227	0.585457	-0.27853	1.0406	2.34875	2.44321	1.53256
AP1/1	same	2.5	0	0	0	0	1	1	0	1.02292	0	0	0
AP1/1	opp	3.5	93	84.919	85.6581	9.25517	0.175167	0.467915	0.873133	1.0406	81.6058	82.3161	9.03359
AP1/1	same	3.5	0	0	0	0	1	1	0	1.02292	0	0	0
AP1/1	opp	4.5	57	81.5582	83.5716	9.14175	0.00259707	0.049633	-2.68637	1.0406	78.3761	80.3109	8.85303
AP1/1	same	4.5	260	271.411	280.808	16.7573	0.255717	0.471472	-0.680947	1.02292	265.328	274.514	16.2889
AP1/1	same	5.5	251	185.963	191.592	13.8417	2.43795e-06	0.000139776	4.69866	1.02292	181.795	187.298	13.4831
AP1/1	opp	5.5	113	148.316	153.709	12.3979	0.0014941	0.0321231	-2.84852	1.0406	142.529	147.712	11.9386
AP1/1	same	6.5	243	216.907	224.457	14.9819	0.0374036	0.268059	1.74167	1.02292	212.045	219.427	14.5618
AP1/1	opp	6.5	127	141.275	144.984	12.0409	0.122158	0.45025	-1.1855	1.0406	135.763	139.327	11.6517
AP1/1	same	7.5	240	222.651	231.068	15.2009	0.116679	0.45025	1.14131	1.02292	217.661	225.889	14.7533
AP1/1	opp	7.5	146	149.466	154.649	12.4358	0.409144	0.501183	-0.278732	1.0406	143.635	148.615	11.9848
AP1/1	same	8.5	216	205.517	213.192	14.6011	0.220355	0.467915	0.717976	1.02292	200.911	208.415	14.1743
AP1/1	opp	8.5	156	152.875	157.737	12.5593	0.380006	0.495159	0.248812	1.0406	146.911	151.582	12.1207
AP1/1	same	9.5	210	199.593	207.292	14.3976	0.218628	0.467915	0.722811	1.02292	195.12	202.647	13.9685
AP1/1	opp	9.5	170	163.392	168.567	12.9833	0.286011	0.471472	0.508968	1.0406	157.017	161.99	12.5306
AP1/1	same	10.5	200	174.061	179.815	13.4095	0.0245005	0.217243	1.9344	1.02292	170.16	175.785	13.0445
AP1/1	opp	10.5	180	173.871	179.403	13.3941	0.304264	0.471472	0.457611	1.0406	167.087	172.403	12.9262
AP1/1	opp	11.5	196	174.938	180.232	13.4251	0.0536188	0.318015	1.56888	1.0406	168.112	173.2	12.9658
AP1/1	same	11.5	176	169.556	174.95	13.2269	0.293778	0.471472	0.487153	1.02292	165.757	171.029	12.8747
AP1/1	same	12.5	183	176.353	182.164	13.4968	0.292163	0.471472	0.492478	1.02292	172.401	178.082	13.1302
AP1/1	opp	12.5	162	168.64	174.469	13.2087	0.321763	0.477097	-0.502672	1.0406	162.06	167.662	12.7303
AP1/1	opp	13.5	188	166.653	172.232	13.1237	0.0474666	0.31401	1.62664	1.0406	160.15	165.512	12.6551
AP1/1	same	13.5	161	168.566	174.051	13.1928	0.296275	0.471472	-0.573467	1.02292	164.788	170.15	12.837
AP1/1	same	14.5	177	170.41	175.922	13.2636	0.290429	0.471472	0.49687	1.02292	166.591	171.98	12.907
AP1/1	opp	14.5	164	159.704	164.67	12.8324	0.347991	0.482698	0.334763	1.0406	153.473	158.245	12.3884
AP1/1	opp	15.5	177	161.592	166.951	12.9209	0.106634	0.45025	1.1925	1.0406	155.287	160.437	12.4614
AP1/1	same	15.5	176	180.962	186.519	13.6572	0.374258	0.495159	-0.3633	1.02292	176.906	182.339	13.3006
AP1/1	same	16.5	193	178.743	184.514	13.5836	0.135363	0.45025	1.04957	1.02292	174.737	180.379	13.2188
AP1/1	opp	16.5	159	168.371	174.145	13.1964	0.249261	0.471472	-0.71011	1.0406	161.802	167.35	12.7201
AP1/1	opp	17.5	156	166.842	172.197	13.1224	0.212979	0.467915	-0.826241	1.0406	160.333	165.479	12.6623
AP1/1	same	17.5	176	176.99	182.597	13.5129	0.490306	0.526221	-0.073258	1.02292	173.023	178.505	13.1538
AP1/1	same	18.5	182	178.334	184.442	13.581	0.37327	0.495159	0.269942	1.02292	174.337	180.309	13.2037
AP1/1	opp	18.5	164	166.401	171.821	13.1081	0.446413	0.508497	-0.183202	1.0406	159.909	165.118	12.6455
AP1/1	same	19.5	146	180.068	185.804	13.631	0.00503877	0.0787881	-2.4993	1.02292	176.033	181.64	13.2677
AP1/1	opp	19.5	166	170.195	175.748	13.257	0.393035	0.501183	-0.31642	1.0406	163.554	168.891	12.7888
AP1/1	opp	20.5	184	168.283	173.839	13.1848	0.106854	0.45025	1.19203	1.0406	161.718	167.056	12.7168
AP1/1	same	20.5	183	180.265	186.539	13.6579	0.400271	0.501183	0.200281	1.02292	176.225	182.359	13.275
AP1/1	same	21.5	156	177.946	183.524	13.5471	0.0516644	0.317367	-1.61995	1.02292	173.958	179.411	13.1893
AP1/1	opp	21.5	161	176.486	182.507	13.5095	0.12885	0.45025	-1.14627	1.0406	169.6	175.387	13.023
AP1/1	opp	22.5	162	177.545	183.096	13.5313	0.12862	0.45025	-1.1488	1.0406	170.618	175.953	13.0621
AP1/1	same	22.5	169	177.408	183.282	13.5382	0.279068	0.471472	-0.621077	1.02292	173.432	179.174	13.1694
AP1/1	opp	23.5	149	175.089	181.012	13.4541	0.0243549	0.217243	-1.93909	1.0406	168.257	173.95	12.9714
AP1/1	same	23.5	176	174.746	180.555	13.4371	0.442332	0.508497	0.0933238	1.02292	170.83	176.509	13.0702
AP1/1	same	24.5	188	168.539	173.952	13.1891	0.0640985	0.359524	1.47556	1.02292	164.762	170.054	12.8359
AP1/1	opp	24.5	168	173.919	179.467	13.3965	0.34446	0.482698	-0.441794	1.0406	167.133	172.465	12.928
AP1/1	same	25.5	148	173.241	178.526	13.3614	0.0277869	0.217243	-1.88911	1.02292	169.359	174.525	13.0138
AP1/1	opp	25.5	180	177.755	184.176	13.5711	0.413767	0.501183	0.16545	1.0406	170.819	176.99	13.0698
AP1/1	same	26.5	166	173.878	179.719	13.4059	0.290888	0.471472	-0.587633	1.02292	169.981	175.691	13.0377
AP1/1	opp	26.5	166	173.552	179.252	13.3885	0.299355	0.471472	-0.564082	1.0406	166.781	172.258	12.9144
AP1/1	same	27.5	198	179.067	184.953	13.5997	0.0750339	0.387354	1.39213	1.02292	175.054	180.808	13.2308
AP1/1	opp	27.5	163	182.626	188.862	13.7427	0.0765701	0.387354	-1.42807	1.0406	175.5	181.494	13.2476
AP1/1	same	28.5	188	175.06	181.005	13.4538	0.154898	0.467412	0.961815	1.02292	171.137	176.948	13.0819
AP1/1	opp	28.5	183	176.364	182.091	13.4941	0.292443	0.471472	0.491779	1.0406	169.483	174.987	13.0186
AP1/1	opp	29.5	171	177.889	183.683	13.553	0.319399	0.477097	-0.508326	1.0406	170.949	176.516	13.0747
AP1/1	same	29.5	169	174.531	180.101	13.4202	0.355704	0.489449	-0.412122	1.02292	170.619	176.065	13.0621
AP1/1	opp	30.5	137	170.695	176.325	13.2787	0.00443027	0.0762007	-2.53753	1.0406	164.035	169.445	12.8076
AP1/1	same	30.5	192	176.575	182.345	13.5035	0.116348	0.45025	1.1423	1.02292	172.618	178.258	13.1384
AP1/1	opp	31.5	154	170.23	175.755	13.2572	0.112765	0.45025	-1.22424	1.0406	163.588	168.897	12.7902
AP1/1	same	31.5	187	173.635	179.181	13.3859	0.146593	0.45025	0.998456	1.02292	169.744	175.166	13.0286
AP1/1	same	32.5	145	171.557	177.27	13.3143	0.021172	0.217243	-1.9946	1.02292	167.712	173.297	12.9504
AP1/1	opp	32.5	168	177.526	183.389	13.5421	0.251207	0.471472	-0.703463	1.0406	170.6	176.234	13.0614
AP1/1	opp	33.5	179	183.809	189.967	13.7829	0.379519	0.495159	-0.348923	1.0406	176.638	182.555	13.2905
AP1/1	same	33.5	172	170.275	176.025	13.2674	0.427444	0.507037	0.130008	1.02292	166.459	172.08	12.9019
AP1/1	same	34.5	140	170.115	175.699	13.2552	0.00993981	0.131511	-2.27197	1.02292	166.303	171.762	12.8959
AP1/1	opp	34.5	160	172.345	177.863	13.3365	0.184039	0.467915	-0.925674	1.0406	165.621	170.924	12.8694
AP1/1	opp	35.5	163	174.683	180.66	13.441	0.199714	0.467915	-0.869206	1.0406	167.868	173.612	12.9564
AP1/1	same	35.5	180	170.255	175.582	13.2507	0.214734	0.467915	0.735396	1.02292	166.44	171.647	12.9012
AP1/1	same	36.5	166	176.394	182.282	13.5012	0.229832	0.471472	-0.769851	1.02292	172.441	178.197	13.1317
AP1/1	opp	36.5	180	180.425	186.846	13.6692	0.507188	0.536295	-0.0310717	1.0406	173.385	179.556	13.1676
AP1/1	same	37.5	199	169.822	175.16	13.2348	0.0129431	0.159015	2.20464	1.02292	166.016	171.234	12.8847
AP1/1	opp	37.5	163	174.527	180.373	13.4303	0.203002	0.467915	-0.85827	1.0406	167.717	173.335	12.9506
AP1/1	opp	38.5	175	179.341	185.111	13.6056	0.391509	0.501183	-0.319097	1.0406	172.344	177.889	13.128
AP1/1	same	38.5	167	167.908	173.134	13.158	0.492567	0.526221	-0.0690159	1.02292	164.145	169.254	12.8119
AP1/1	opp	39.5	182	181.241	187.578	13.6959	0.457885	0.509564	0.0553964	1.0406	174.17	180.26	13.1973
AP1/1	same	39.5	177	177.392	183.235	13.5364	0.508233	0.536295	-0.0289481	1.02292	173.416	179.128	13.1688
AP1/1	same	40.5	200	177.666	183.628	13.5509	0.0454653	0.312802	1.64817	1.02292	173.684	179.513	13.1789
AP1/1	opp	40.5	174	176.292	181.934	13.4883	0.45122	0.509564	-0.169893	1.0406	169.413	174.835	13.0159
AP1/1	opp	41.5	191	179.025	184.862	13.5964	0.175115	0.467915	0.880733	1.0406	172.04	177.649	13.1164
AP1/1	same	41.5	174	179.247	185.175	13.6079	0.365549	0.495074	-0.385617	1.02292	175.23	181.026	13.2375
AP1/1	same	42.5	179	172.694	178.595	13.364	0.299039	0.471472	0.471861	1.02292	168.824	174.593	12.9932
AP1/1	opp	42.5	179	178.098	183.923	13.5618	0.453283	0.509564	0.0664826	1.0406	171.15	176.748	13.0824
AP1/1	opp	43.5	196	178.939	184.727	13.5914	0.0960436	0.446473	1.25528	1.0406	171.957	177.52	13.1133
AP1/1	same	43.5	169	171.911	177.446	13.3209	0.431903	0.508497	-0.218494	1.02292	168.058	173.469	12.9637
AP1/2	opp	-42.5	111	104.317	107.741	10.3799	0.238346	0.468036	0.643888	0.989598	105.413	108.874	10.2671
AP1/2	same	-42.5	118	114.49	118.426	10.8824	0.348966	0.479066	0.32254	1.01427	112.88	116.761	10.6245
AP1/2	opp	-41.5	113	103.794	107.305	10.3588	0.169909	0.468036	0.888708	0.989598	104.885	108.433	10.2413
AP1/2	same	-41.5	111	108.098	111.795	10.5733	0.366384	0.479066	0.274432	1.01427	106.578	110.223	10.3237
AP1/2	opp	-40.5	97	107.288	110.988	10.5351	0.172702	0.468036	-0.97654	0.989598	108.416	112.155	10.4123
AP1/2	same	-40.5	103	105.022	108.437	10.4133	0.447269	0.481079	-0.194183	1.01427	103.545	106.911	10.1757
AP1/2	same	-39.5	121	107.006	110.594	10.5164	0.0827286	0.468036	1.33067	1.01427	105.501	109.038	10.2714
AP1/2	opp	-39.5	101	105.982	109.579	10.468	0.336453	0.479066	-0.475923	0.989598	107.096	110.731	10.3487
AP1/2	opp	-38.5	94	105.183	108.597	10.421	0.148349	0.468036	-1.07316	0.989598	106.289	109.738	10.3097
AP1/2	same	-38.5	113	103.25	106.667	10.328	0.15651	0.468036	0.944077	1.01427	101.797	105.167	10.0895
AP1/2	same	-37.5	90	105.989	109.398	10.4593	0.0633896	0.468036	-1.52867	1.01427	104.498	107.859	10.2224
AP1/2	opp	-37.5	116	108.454	112.065	10.5861	0.217943	0.468036	0.712819	0.989598	109.594	113.243	10.4687
AP1/2	opp	-36.5	113	102.434	105.714	10.2817	0.137694	0.468036	1.02766	0.989598	103.511	106.826	10.174
AP1/2	same	-36.5	117	110.621	114.513	10.7011	0.253631	0.474165	0.596079	1.01427	109.065	112.902	10.4434
AP1/2	opp	-35.5	96	100.841	103.901	10.1932	0.337699	0.479066	-0.47497	0.989598	101.901	104.993	10.0946
AP1/2	same	-35.5	100	104.126	107.383	10.3626	0.366539	0.479066	-0.398209	1.01427	102.662	105.873	10.1322
AP1/2	same	-34.5	104	106.002	109.785	10.4778	0.448278	0.481079	-0.191095	1.01427	104.511	108.241	10.2231
AP1/2	opp	-34.5	104	104.737	108.17	10.4005	0.497267	0.511807	-0.0708562	0.989598	105.838	109.307	10.2878
AP1/2	same	-33.5	116	108.579	112.156	10.5904	0.221538	0.468036	0.700727	1.01427	107.052	110.578	10.3466
AP1/2	opp	-33.5	98	100.777	103.874	10.1919	0.41646	0.479066	-0.272433	0.989598	101.836	104.966	10.0914
AP1/2	opp	-32.5	95	99.9111	103.021	10.1499	0.334399	0.479066	-0.483861	0.989598	100.961	104.104	10.048
AP1/2	same	-32.5	105	109.758	113.438	10.6507	0.347148	0.479066	-0.446692	1.01427	108.214	111.842	10.4026
AP1/2	same	-31.5	114	111.311	114.876	10.718	0.375773	0.479066	0.250911	1.01427	109.745	113.26	10.4759
AP1/2	opp	-31.5	99	102.001	105.429	10.2679	0.408241	0.479066	-0.292277	0.989598	103.073	106.537	10.1525
AP1/2	same	-30.5	115	110.481	114.112	10.6823	0.312183	0.479066	0.423003	1.01427	108.927	112.507	10.4368
AP1/2	opp	-30.5	104	104.136	107.572	10.3717	0.520734	0.525379	-0.0131082	0.989598	105.231	108.703	10.2582
AP1/2	same	-29.5	103	105.864	109.453	10.462	0.415136	0.479066	-0.273762	1.01427	104.375	107.913	10.2164
AP1/2	opp	-29.5	102	103.674	107.218	10.3546	0.460522	0.483461	-0.161685	0.989598	104.764	108.345	10.2354
AP1/2	opp	-28.5	125	104.71	108.284	10.4059	0.0235541	0.468036	1.94988	0.989598	105.81	109.422	10.2864
AP1/2	same	-28.5	93	107.128	110.645	10.5188	0.0918116	0.468036	-1.3431	1.01427	105.621	109.089	10.2772
AP1/2	opp	-27.5	89	105.961	109.475	10.463	0.0518929	0.468036	-1.62101	0.989598	107.074	110.626	10.3477
AP1/2	same	-27.5	113	109.45	113.003	10.6303	0.344339	0.479066	0.333979	1.01427	107.91	111.413	10.388
AP1/2	opp	-26.5	117	102.88	106.364	10.3133	0.0770495	0.468036	1.3691	0.989598	103.961	107.482	10.1962
AP1/2	same	-26.5	99	106.661	110.148	10.4951	0.246662	0.468036	-0.729968	1.01427	105.161	108.599	10.2548
AP1/2	same	-25.5	99	107.81	111.186	10.5445	0.21339	0.468036	-0.835546	1.01427	106.294	109.622	10.3099
AP1/2	opp	-25.5	108	104.149	107.478	10.3671	0.330094	0.479066	0.371452	0.989598	105.244	108.607	10.2588
AP1/2	opp	-24.5	108	105.492	109.247	10.4521	0.379159	0.479066	0.239982	0.989598	106.601	110.395	10.3248
AP1/2	same	-24.5	106	104.443	107.797	10.3825	0.41415	0.479066	0.149951	1.01427	102.974	106.281	10.1476
AP1/2	opp	-23.5	95	104.755	107.994	10.392	0.183641	0.468036	-0.93875	0.989598	105.857	109.129	10.2887
AP1/2	same	-23.5	101	103.823	107.358	10.3614	0.415907	0.479066	-0.272427	1.01427	102.362	105.848	10.1174
AP1/2	same	-22.5	112	107.794	111.181	10.5442	0.32061	0.479066	0.398901	1.01427	106.278	109.617	10.3091
AP1/2	opp	-22.5	102	101.745	105.002	10.2471	0.463638	0.483461	0.0248797	0.989598	102.815	106.106	10.1397
AP1/2	opp	-21.5	98	103.517	106.947	10.3415	0.315389	0.479066	-0.533479	0.989598	104.605	108.071	10.2277
AP1/2	same	-21.5	102	103.579	107.082	10.348	0.464232	0.483461	-0.152586	1.01427	102.122	105.576	10.1055
AP1/2	same	-20.5	92	106.578	110.056	10.4908	0.0839595	0.468036	-1.3896	1.01427	105.079	108.508	10.2508
AP1/2	opp	-20.5	92	101.63	104.901	10.2421	0.183276	0.468036	-0.940254	0.989598	102.698	106.004	10.134
AP1/2	same	-19.5	100	107.159	110.576	10.5155	0.2631	0.477185	-0.6808	1.01427	105.652	109.021	10.2787
AP1/2	opp	-19.5	97	101.188	104.581	10.2265	0.362356	0.479066	-0.409493	0.989598	102.251	105.68	10.1119
AP1/2	same	-18.5	114	104.786	108.001	10.3924	0.17082	0.468036	0.886654	1.01427	103.312	106.482	10.1642
AP1/2	opp	-18.5	115	106.488	110.298	10.5023	0.19014	0.468036	0.81051	0.989598	107.607	111.457	10.3734
AP1/2	same	-17.5	129	108.891	112.276	10.596	0.0266373	0.468036	1.89782	1.01427	107.359	110.697	10.3614
AP1/2	opp	-17.5	96	104.183	107.605	10.3733	0.227931	0.468036	-0.788822	0.989598	105.278	108.736	10.2605
AP1/2	opp	-16.5	100	104.154	107.729	10.3792	0.36553	0.479066	-0.40022	0.989598	105.249	108.861	10.2591
AP1/2	same	-16.5	101	104.705	108.029	10.3937	0.38267	0.479066	-0.356498	1.01427	103.233	106.51	10.1603
AP1/2	opp	-15.5	118	106.564	110.051	10.4905	0.124762	0.468036	1.09014	0.989598	107.684	111.208	10.3771
AP1/2	same	-15.5	101	98.7903	102.063	10.1026	0.386632	0.479066	0.218728	1.01427	97.4007	100.628	9.86918
AP1/2	opp	-14.5	98	106.762	110.402	10.5072	0.213628	0.468036	-0.833895	0.989598	107.884	111.563	10.3867
AP1/2	same	-14.5	101	103.222	106.926	10.3405	0.439011	0.480019	-0.214864	1.01427	101.77	105.422	10.0881
AP1/2	same	-13.5	109	98.1381	101.448	10.0722	0.12666	0.468036	1.07841	1.01427	96.7578	100.021	9.83655
AP1/2	opp	-13.5	110	102.638	105.804	10.2861	0.21691	0.468036	0.715704	0.989598	103.717	106.916	10.1842
AP1/2	opp	-12.5	92	97.0736	100.442	10.0221	0.326051	0.479066	-0.506238	0.989598	98.0939	101.498	9.90424
AP1/2	same	-12.5	100	98.1426	101.24	10.0618	0.399827	0.479066	0.1846	1.01427	96.7622	99.8162	9.83678
AP1/2	opp	-11.5	113	96.253	99.6283	9.9814	0.0422133	0.468036	1.67783	0.989598	97.2647	100.676	9.86229
AP1/2	same	-11.5	100	110.231	113.98	10.6761	0.177505	0.468036	-0.958351	1.01427	108.681	112.377	10.425
AP1/2	opp	-10.5	110	101.558	104.924	10.2432	0.186445	0.468036	0.824157	0.989598	102.625	106.027	10.1304
AP1/2	same	-10.5	100	107.719	111.582	10.5632	0.245963	0.468036	-0.730706	1.01427	106.204	110.012	10.3055
AP1/2	same	-9.5	111	102.981	106.256	10.308	0.199202	0.468036	0.777901	1.01427	101.533	104.761	10.0764
AP1/2	opp	-9.5	104	101.25	104.361	10.2157	0.367748	0.479066	0.26924	0.989598	102.314	105.458	10.115
AP1/2	opp	-8.5	101	103.329	106.852	10.3369	0.434862	0.480019	-0.225318	0.989598	104.415	107.975	10.2184
AP1/2	same	-8.5	106	106.164	109.703	10.4739	0.519446	0.525379	-0.0156717	1.01427	104.671	108.16	10.2309
AP1/2	same	-7.5	112	105.853	109.371	10.4581	0.25608	0.474165	0.587733	1.01427	104.365	107.833	10.2159
AP1/2	opp	-7.5	110	106.173	109.858	10.4813	0.332438	0.479066	0.365105	0.989598	107.289	111.013	10.3581
AP1/2	same	-6.5	114	107.199	111.288	10.5493	0.237842	0.468036	0.64464	1.01427	105.692	109.723	10.2806
AP1/2	opp	-6.5	109	106.968	110.634	10.5183	0.397465	0.479066	0.193176	0.989598	108.092	111.797	10.3968
AP1/2	same	-5.5	106	102.124	106.222	10.3064	0.327667	0.479066	0.376059	1.01427	100.688	104.728	10.0343
AP1/2	opp	-5.5	124	128.198	133.22	11.5421	0.376975	0.479066	-0.363755	0.989598	129.546	134.62	11.3818
AP1/2	opp	-4.5	114	88.6002	91.3083	9.55554	0.00404184	0.355682	2.65812	0.989598	89.5315	92.2681	9.46211
AP1/2	same	-4.5	92	100.265	103.08	10.1528	0.22097	0.468036	-0.814049	1.01427	98.8546	101.63	9.94257
AP1/2	same	-3.5	50	63.7642	66.0608	8.12778	0.0443208	0.468036	-1.69347	1.01427	62.8673	65.1317	7.92889
AP1/2	opp	-3.5	74	62.3755	63.9957	7.99973	0.0655752	0.468036	1.45311	0.989598	63.0312	64.6684	7.93922
AP1/2	same	-2.5	54	71.7774	73.6927	8.58444	0.0174283	0.468036	-2.07088	1.01427	70.7678	72.6561	8.41236
AP1/2	opp	-2.5	72	70.6351	73.305	8.56184	0.404892	0.479066	0.159416	0.989598	71.3776	74.0756	8.44853
AP1/2	same	-1.5	121	108.519	109.359	10.4575	0.107836	0.468036	1.19348	1.01427	106.993	107.821	10.3437
AP1/2	opp	-1.5	0	0.398915	0.395624	0.628987	0.671048	0.671048	-0.634219	0.989598	0.403108	0.399783	0.634908
AP1/2	same	-0.5	55	46.6943	47.8554	6.91776	0.101197	0.468036	1.20064	1.01427	46.0375	47.1823	6.78509
AP1/2	opp	-0.5	10	12.1274	12.3049	3.50783	0.334013	0.479066	-0.606479	0.989598	12.2549	12.4342	3.5007
AP1/2	opp	0.5	281	316.424	324.038	18.001	0.0232062	0.468036	-1.96787	1.033	312.888	320.417	17.6886
AP1/2	same	0.5	2	5.47001	5.91896	2.43289	0.0902477	0.468036	-1.42629	1.01653	5.38707	5.8292	2.32101
AP1/2	opp	1.5	99	114.963	115.239	10.7349	0.0720734	0.468036	-1.48702	1.033	111.29	111.558	10.5494
AP1/2	same	1.5	5	4.46266	4.50082	2.12151	0.290704	0.479066	0.253282	1.01653	4.3901	4.42763	2.09526
AP1/2	opp	2.5	13	16.1988	16.3064	4.03812	0.258635	0.474165	-0.792147	1.033	15.6813	15.7855	3.95996
AP1/2	same	2.5	46	44.1582	44.2464	6.65179	0.354098	0.479066	0.276882	1.01653	43.4402	43.5269	6.59092
AP1/2	same	3.5	200	230.606	236.454	15.3771	0.0218503	0.468036	-1.99036	1.01653	226.856	232.609	15.0617
AP1/2	opp	3.5	1	0.93068	0.988623	0.994295	0.238761	0.468036	0.069718	1.033	0.900949	0.957041	0.949183
AP1/2	opp	4.5	4	13.0281	13.2791	3.64405	0.00366529	0.355682	-2.4775	1.033	12.6119	12.8549	3.55133
AP1/2	same	4.5	16	17.4634	17.8866	4.22925	0.423808	0.480019	-0.346019	1.01653	17.1794	17.5957	4.14481
AP1/2	opp	5.5	58	51.3395	51.889	7.2034	0.158616	0.468036	0.924626	1.033	49.6995	50.2314	7.04978
AP1/2	same	5.5	13	16.1093	16.3695	4.04592	0.265705	0.477185	-0.768506	1.01653	15.8474	16.1033	3.98088
AP1/2	opp	6.5	45	52.5719	53.9562	7.34549	0.164793	0.468036	-1.03083	1.033	50.8925	52.2325	7.1339
AP1/2	same	6.5	149	151.776	157.35	12.5439	0.43186	0.480019	-0.221307	1.01653	149.308	154.792	12.2192
AP1/2	same	7.5	122	103.915	107.272	10.3572	0.0368545	0.468036	1.74612	1.01653	102.225	105.528	10.1107
AP1/2	opp	7.5	84	99.8725	103.345	10.1659	0.0589911	0.468036	-1.56135	1.033	96.682	100.043	9.8327
AP1/2	same	8.5	131	112.748	116.299	10.7842	0.0413326	0.468036	1.69243	1.01653	110.915	114.408	10.5316
AP1/2	opp	8.5	91	86.3884	88.7019	9.41817	0.286907	0.479066	0.489647	1.033	83.6287	85.8683	9.14487
AP1/2	opp	9.5	90	95.4082	98.5719	9.92834	0.312187	0.479066	-0.544723	1.033	92.3603	95.423	9.61043
AP1/2	same	9.5	127	122.647	126.934	11.2665	0.326231	0.479066	0.386379	1.01653	120.653	124.87	10.9842
AP1/2	same	10.5	122	111.638	115.511	10.7476	0.152078	0.468036	0.964142	1.01653	109.823	113.633	10.4796
AP1/2	opp	10.5	98	101.111	104.521	10.2236	0.403568	0.479066	-0.304295	1.033	97.8809	101.182	9.89348
AP1/2	same	11.5	125	106.342	110.133	10.4944	0.0342625	0.468036	1.77788	1.01653	104.613	108.342	10.228
AP1/2	opp	11.5	89	105.689	109.21	10.4504	0.0546829	0.468036	-1.59697	1.033	102.313	105.721	10.115
AP1/2	same	12.5	106	103.505	106.953	10.3418	0.378555	0.479066	0.241227	1.01653	101.822	105.214	10.0907
AP1/2	opp	12.5	109	111.144	114.681	10.7089	0.444137	0.481079	-0.200232	1.033	107.594	111.018	10.3727
AP1/2	same	13.5	112	102.465	105.799	10.2859	0.160597	0.468036	0.926983	1.01653	100.799	104.079	10.0399
AP1/2	opp	13.5	110	108.633	111.867	10.5767	0.422875	0.480019	0.129209	1.033	105.163	108.294	10.2549
AP1/2	same	14.5	106	107.225	110.86	10.529	0.478464	0.49535	-0.116392	1.01653	105.482	109.057	10.2704
AP1/2	opp	14.5	105	105.091	108.442	10.4135	0.522394	0.525379	-0.00871266	1.033	101.734	104.978	10.0863
AP1/2	opp	15.5	130	105.965	109.551	10.4666	0.0103072	0.468036	2.29633	1.033	102.58	106.051	10.1282
AP1/2	same	15.5	110	106.494	110.081	10.4919	0.343898	0.479066	0.334145	1.01653	104.763	108.291	10.2354
AP1/2	same	16.5	101	107.152	110.56	10.5148	0.296437	0.479066	-0.585103	1.01653	105.41	108.762	10.2669
AP1/2	opp	16.5	95	100.566	103.496	10.1733	0.311099	0.479066	-0.547135	1.033	97.3535	100.19	9.86679
AP1/2	opp	17.5	110	99.9489	103.299	10.1636	0.145943	0.468036	0.988933	1.033	96.756	99.9987	9.83646
AP1/2	same	17.5	112	108.734	112.189	10.592	0.353831	0.479066	0.308333	1.01653	106.966	110.365	10.3424
AP1/2	same	18.5	97	104.734	108.176	10.4008	0.242366	0.468036	-0.743565	1.01653	103.031	106.417	10.1504
AP1/2	opp	18.5	101	106.933	110.494	10.5116	0.303738	0.479066	-0.564441	1.033	103.517	106.964	10.1743
AP1/2	same	19.5	99	101.4	104.559	10.2254	0.431452	0.480019	-0.234733	1.01653	99.7514	102.858	9.98756
AP1/2	opp	19.5	102	104.227	107.346	10.3608	0.439109	0.480019	-0.214932	1.033	100.897	103.917	10.0448
AP1/2	opp	20.5	94	103.861	107.381	10.3625	0.179781	0.468036	-0.951558	1.033	100.543	103.951	10.0271
AP1/2	same	20.5	102	104.49	108.097	10.397	0.428986	0.480019	-0.239523	1.01653	102.791	106.339	10.1386
AP1/2	same	21.5	100	110.691	114.352	10.6935	0.166532	0.468036	-0.999738	1.01653	108.891	112.492	10.4351
AP1/2	opp	21.5	107	106.6	110.348	10.5047	0.458906	0.483461	0.0380834	1.033	103.195	106.823	10.1585
AP1/2	opp	22.5	118	103.044	106.445	10.3172	0.0664488	0.468036	1.44961	1.033	99.7523	103.044	9.98761
AP1/2	same	22.5	109	107.244	110.864	10.5292	0.407834	0.479066	0.16675	1.01653	105.5	109.061	10.2713
AP1/2	same	23.5	97	105.497	108.933	10.4371	0.219967	0.468036	-0.814131	1.01653	103.782	107.162	10.1873
AP1/2	opp	23.5	112	109.073	113.052	10.6326	0.36605	0.479066	0.275285	1.033	105.589	109.441	10.2756
AP1/2	same	24.5	95	105.387	108.786	10.43	0.167954	0.468036	-0.995895	1.01653	103.674	107.017	10.182
AP1/2	opp	24.5	102	110.114	113.699	10.663	0.236346	0.468036	-0.760945	1.033	106.596	110.066	10.3245
AP1/2	opp	25.5	120	109.291	112.974	10.6289	0.142243	0.468036	1.00752	1.033	105.8	109.365	10.2859
AP1/2	same	25.5	98	106.112	109.649	10.4713	0.232178	0.468036	-0.774717	1.01653	104.387	107.866	10.217
AP1/2	opp	26.5	123	111.149	114.823	10.7156	0.121748	0.468036	1.10594	1.033	107.598	111.155	10.373
AP1/2	same	26.5	113	105.481	108.885	10.4348	0.215563	0.468036	0.720595	1.01653	103.766	107.115	10.1865
AP1/2	opp	27.5	95	106.228	109.743	10.4759	0.148542	0.468036	-1.07181	1.033	102.835	106.238	10.1407
AP1/2	same	27.5	109	105.396	108.644	10.4233	0.339691	0.479066	0.345722	1.01653	103.683	106.878	10.1825
AP1/2	opp	28.5	99	107.115	110.624	10.5178	0.233186	0.468036	-0.771504	1.033	103.693	107.09	10.183
AP1/2	same	28.5	105	105.617	109.294	10.4544	0.501921	0.513593	-0.0590545	1.01653	103.9	107.517	10.1931
AP1/2	opp	29.5	87	109.17	112.841	10.6227	0.0164857	0.468036	-2.08703	1.033	105.682	109.237	10.2802
AP1/2	same	29.5	88	105.228	108.742	10.428	0.0484263	0.468036	-1.65207	1.01653	103.517	106.974	10.1743
AP1/2	opp	30.5	120	110.677	114.314	10.6918	0.174625	0.468036	0.871999	1.033	107.141	110.662	10.3509
AP1/2	same	30.5	101	103.928	107.471	10.3668	0.411905	0.479066	-0.282415	1.01653	102.238	105.723	10.1113
AP1/2	same	31.5	116	104.64	108.126	10.3984	0.124144	0.468036	1.0925	1.01653	102.938	106.368	10.1459
AP1/2	opp	31.5	100	110.205	113.86	10.6705	0.178147	0.468036	-0.956394	1.033	106.685	110.222	10.3288
AP1/2	opp	32.5	97	106.766	110.287	10.5018	0.185717	0.468036	-0.9299	1.033	103.355	106.764	10.1664
AP1/2	same	32.5	100	108.337	112.115	10.5884	0.227812	0.468036	-0.787368	1.01653	106.575	110.292	10.3235
AP1/2	same	33.5	112	105.574	109.133	10.4467	0.247315	0.468036	0.615132	1.01653	103.857	107.358	10.191
AP1/2	opp	33.5	100	103.783	106.992	10.3437	0.379232	0.479066	-0.365714	1.033	100.467	103.574	10.0233
AP1/2	same	34.5	94	103.729	106.949	10.3416	0.183131	0.468036	-0.94078	1.01653	102.042	105.21	10.1016
AP1/2	opp	34.5	100	108.413	112.185	10.5917	0.225632	0.468036	-0.79432	1.033	104.95	108.601	10.2445
AP1/2	same	35.5	112	104.972	108.614	10.4218	0.228957	0.468036	0.674321	1.01653	103.265	106.848	10.162
AP1/2	opp	35.5	114	109.612	113.254	10.6421	0.315857	0.479066	0.412352	1.033	106.11	109.636	10.301
AP1/2	same	36.5	97	105.195	108.702	10.426	0.228666	0.468036	-0.786041	1.01653	103.485	106.934	10.1727
AP1/2	opp	36.5	102	105.558	109.001	10.4403	0.388663	0.479066	-0.340823	1.033	102.186	105.519	10.1087
AP1/2	same	37.5	86	105.429	108.841	10.4327	0.0296169	0.468036	-1.86228	1.01653	103.714	107.071	10.184
AP1/2	opp	37.5	104	105.705	109.182	10.449	0.459705	0.483461	-0.163184	1.033	102.328	105.694	10.1157
AP1/2	same	38.5	96	107.291	110.707	10.5217	0.148321	0.468036	-1.07314	1.01653	105.547	108.907	10.2736
AP1/2	opp	38.5	105	109.356	113.176	10.6384	0.361341	0.479066	-0.409452	1.033	105.862	109.561	10.2889
AP1/2	same	39.5	114	102.008	105.219	10.2576	0.109538	0.468036	1.16906	1.01653	100.349	103.508	10.0175
AP1/2	opp	39.5	120	108.753	112.323	10.5983	0.130779	0.468036	1.06119	1.033	105.279	108.735	10.2606
AP1/2	opp	40.5	92	110.336	114.084	10.681	0.0417463	0.468036	-1.71667	1.033	106.811	110.439	10.3349
AP1/2	same	40.5	87	99.9421	103.057	10.1517	0.104781	0.468036	-1.27487	1.01653	98.317	101.381	9.91549
AP1/2	same	41.5	96	104.59	107.902	10.3876	0.216216	0.468036	-0.826932	1.01653	102.889	106.147	10.1434
AP1/2	opp	41.5	113	109.412	113.301	10.6443	0.343011	0.479066	0.337065	1.033	105.917	109.681	10.2916
AP1/2	same	42.5	94	107.289	110.814	10.5268	0.106737	0.468036	-1.26238	1.01653	105.544	109.012	10.2735
AP1/2	opp	42.5	94	107.064	110.517	10.5127	0.110702	0.468036	-1.24272	1.033	103.644	106.986	10.1806
AP1/2	same	43.5	98	108.375	111.83	10.5749	0.171751	0.468036	-0.981087	1.01653	106.613	110.011	10.3253
AP1/2	opp	43.5	121	112.088	115.721	10.7574	0.186049	0.468036	0.828486	1.033	108.507	112.024	10.4167
AP1/2	opp	44.5	106	112.076	115.825	10.7622	0.303183	0.479066	-0.564565	1.033	108.496	112.125	10.4161
AP1/2	same	44.5	103	105.887	109.261	10.4528	0.414287	0.479066	-0.276152	1.01653	104.165	107.484	10.2061
BATF	opp	-44.5	43	37.7463	39.0743	6.25094	0.173438	0.455683	0.84047	0.974375	38.739	40.1019	6.22406
BATF	same	-44.5	42	38.3844	39.6594	6.29757	0.248432	0.47141	0.574126	1.05951	36.2285	37.432	6.01901
BATF	opp	-43.5	51	37.7696	39.1481	6.25684	0.0161093	0.45483	2.11456	0.974375	38.7629	40.1776	6.22598
BATF	same	-43.5	33	36.9119	38.1602	6.1774	0.293698	0.475973	-0.63326	1.05951	34.8387	36.0169	5.90243
BATF	opp	-42.5	41	36.4233	37.6296	6.1343	0.197723	0.457886	0.746082	0.974375	37.3812	38.6193	6.11402
BATF	same	-42.5	35	37.282	38.567	6.21023	0.394883	0.491668	-0.367461	1.05951	35.1881	36.4009	5.93195
BATF	opp	-41.5	35	33.3729	34.5674	5.87941	0.347141	0.491668	0.276754	0.974375	34.2505	35.4765	5.85239
BATF	same	-41.5	36	37.5715	38.8091	6.22969	0.441079	0.510431	-0.252255	1.05951	35.4613	36.6293	5.95494
BATF	same	-40.5	30	37.6093	38.9026	6.23719	0.120844	0.45483	-1.21999	1.05951	35.497	36.7176	5.95794
BATF	opp	-40.5	37	35.2	36.4084	6.03394	0.340376	0.491668	0.298314	0.974375	36.1257	37.3659	6.01047
BATF	opp	-39.5	36	35.5815	36.6999	6.05804	0.428091	0.498537	0.0690802	0.974375	36.5173	37.665	6.04295
BATF	same	-39.5	38	38.1232	39.4616	6.28185	0.535042	0.549379	-0.019619	1.05951	35.982	37.2453	5.9985
BATF	same	-38.5	32	39.8517	41.239	6.42176	0.119787	0.45483	-1.22267	1.05951	37.6134	38.9228	6.13298
BATF	opp	-38.5	40	34.3341	35.3225	5.94327	0.146707	0.45483	0.953323	0.974375	35.2371	36.2514	5.93608
BATF	same	-37.5	36	38.7886	40.1216	6.33416	0.365401	0.491668	-0.440254	1.05951	36.6101	37.8681	6.05063
BATF	opp	-37.5	34	34.4494	35.6984	5.97482	0.514802	0.543683	-0.0752104	0.974375	35.3554	36.6373	5.94604
BATF	same	-36.5	31	38.7089	39.9426	6.32002	0.121008	0.45483	-1.21976	1.05951	36.5348	37.6993	6.0444
BATF	opp	-36.5	39	33.8849	35.0148	5.91733	0.166615	0.455683	0.864418	0.974375	34.7761	35.9357	5.89713
BATF	opp	-35.5	34	36.2169	37.4572	6.12023	0.397592	0.491668	-0.362232	0.974375	37.1694	38.4423	6.09667
BATF	same	-35.5	40	39.2121	40.4483	6.35989	0.408618	0.494643	0.123878	1.05951	37.0098	38.1765	6.08357
BATF	opp	-34.5	44	35.2477	36.3783	6.03145	0.0637782	0.45483	1.45111	0.974375	36.1747	37.3351	6.01454
BATF	same	-34.5	41	37.92	39.1939	6.2605	0.274488	0.47141	0.491979	1.05951	35.7902	36.9926	5.98249
BATF	opp	-33.5	37	34.1484	35.3019	5.94154	0.276697	0.47141	0.479937	0.974375	35.0465	36.2303	5.92001
BATF	same	-33.5	37	38.373	39.6059	6.29332	0.454468	0.513028	-0.218174	1.05951	36.2178	37.3814	6.01812
BATF	same	-32.5	31	38.4315	39.5821	6.29143	0.129944	0.45483	-1.18121	1.05951	36.273	37.359	6.0227
BATF	opp	-32.5	40	35.5134	36.6141	6.05096	0.198865	0.457886	0.741466	0.974375	36.4474	37.577	6.03717
BATF	opp	-31.5	39	32.6742	33.6513	5.80098	0.118185	0.45483	1.09047	0.974375	33.5335	34.5363	5.79081
BATF	same	-31.5	43	37.2787	38.4699	6.20241	0.154086	0.45483	0.922425	1.05951	35.185	36.3093	5.93169
BATF	opp	-30.5	45	33.6166	34.6566	5.88698	0.0243563	0.45483	1.93365	0.974375	34.5007	35.568	5.87373
BATF	same	-30.5	41	39.389	40.8214	6.38916	0.359494	0.491668	0.252142	1.05951	37.1767	38.5286	6.09727
BATF	same	-29.5	35	39.6738	40.9847	6.40193	0.258567	0.47141	-0.730065	1.05951	37.4455	38.6828	6.11928
BATF	opp	-29.5	36	33.1739	34.2226	5.85001	0.275328	0.47141	0.483093	0.974375	34.0463	35.1226	5.83492
BATF	opp	-28.5	39	33.4827	34.6289	5.88464	0.149411	0.45483	0.937579	0.974375	34.3633	35.5396	5.86202
BATF	same	-28.5	39	39.5655	40.8562	6.39189	0.506451	0.541785	-0.0884683	1.05951	37.3433	38.5615	6.11091
BATF	same	-27.5	48	40.3338	41.6923	6.45695	0.101823	0.45483	1.18728	1.05951	38.0684	39.3506	6.16996
BATF	opp	-27.5	41	34.5108	35.6751	5.97286	0.118961	0.45483	1.08645	0.974375	35.4184	36.6133	5.95133
BATF	opp	-26.5	24	33.4889	34.489	5.87273	0.0546289	0.45483	-1.61575	0.974375	34.3696	35.396	5.86256
BATF	same	-26.5	39	39.0746	40.4109	6.35695	0.53769	0.549379	-0.0117424	1.05951	36.88	38.1412	6.07289
BATF	same	-25.5	43	37.6408	38.8116	6.2299	0.168956	0.455683	0.860246	1.05951	35.5267	36.6318	5.96042
BATF	opp	-25.5	39	34.2549	35.3168	5.94279	0.183391	0.455999	0.798455	0.974375	35.1558	36.2456	5.92923
BATF	opp	-24.5	37	34.0669	35.0851	5.92326	0.271961	0.47141	0.495187	0.974375	34.9628	36.0078	5.91294
BATF	same	-24.5	37	38.9871	40.2457	6.34395	0.415761	0.498537	-0.313223	1.05951	36.7974	37.9853	6.06608
BATF	same	-23.5	36	38.4311	39.7327	6.30339	0.387072	0.491668	-0.385675	1.05951	36.2726	37.5011	6.02267
BATF	opp	-23.5	34	33.5802	34.6421	5.88576	0.425932	0.498537	0.0713255	0.974375	34.4633	35.5532	5.87055
BATF	opp	-22.5	33	34.0214	35.2167	5.93436	0.475732	0.521008	-0.172112	0.974375	34.9161	36.1428	5.90898
BATF	same	-22.5	38	38.2738	39.4653	6.28214	0.525328	0.543683	-0.0435761	1.05951	36.1241	37.2487	6.01033
BATF	same	-21.5	42	37.387	38.6656	6.21817	0.199081	0.457886	0.741862	1.05951	35.2871	36.4939	5.9403
BATF	opp	-21.5	32	36.9424	38.2365	6.18356	0.236307	0.47141	-0.799287	0.974375	37.914	39.242	6.15743
BATF	opp	-20.5	39	34.8476	36.0371	6.00309	0.212085	0.468507	0.69171	0.974375	35.7641	36.9848	5.98031
BATF	same	-20.5	39	35.404	36.4999	6.04151	0.240935	0.47141	0.595219	1.05951	33.4155	34.4499	5.78061
BATF	opp	-19.5	31	35.2148	36.3473	6.02888	0.271326	0.47141	-0.699103	0.974375	36.1409	37.3032	6.01173
BATF	same	-19.5	36	37.1937	38.4287	6.19909	0.465492	0.519095	-0.192567	1.05951	35.1047	36.2704	5.92493
BATF	same	-18.5	33	36.4379	37.6071	6.13247	0.320831	0.491668	-0.560607	1.05951	34.3914	35.4949	5.86442
BATF	opp	-18.5	33	34.7429	36.006	6.0005	0.427165	0.498537	-0.290461	0.974375	35.6566	36.9529	5.97132
BATF	same	-17.5	27	37.7913	39.0117	6.24593	0.0416717	0.45483	-1.72773	1.05951	35.6687	36.8206	5.97233
BATF	opp	-17.5	41	34.659	35.915	5.99291	0.124218	0.45483	1.05808	0.974375	35.5705	36.8595	5.9641
BATF	opp	-16.5	40	33.6687	34.8523	5.90358	0.121315	0.45483	1.07245	0.974375	34.5541	35.7689	5.87828
BATF	same	-16.5	40	42.4049	43.7411	6.61371	0.394007	0.491668	-0.363621	1.05951	40.0232	41.2844	6.32639
BATF	opp	-15.5	28	34.4278	35.5242	5.96022	0.15573	0.45483	-1.07846	0.974375	35.3333	36.4585	5.94418
BATF	same	-15.5	37	42.4209	43.7907	6.61746	0.228225	0.47141	-0.819185	1.05951	40.0384	41.3312	6.32759
BATF	same	-14.5	44	36.2599	37.4711	6.12137	0.0888702	0.45483	1.26444	1.05951	34.2234	35.3666	5.85008
BATF	opp	-14.5	34	36.7513	38.1568	6.17712	0.364154	0.491668	-0.445403	0.974375	37.7178	39.1603	6.14148
BATF	opp	-13.5	38	35.5798	36.8039	6.06662	0.304765	0.487625	0.398936	0.974375	36.5155	37.7718	6.04281
BATF	same	-13.5	39	40.0881	41.5214	6.44371	0.473434	0.521008	-0.168858	1.05951	37.8365	39.1893	6.15114
BATF	same	-12.5	47	39.205	40.3288	6.3505	0.0955084	0.45483	1.22746	1.05951	37.0031	38.0637	6.08302
BATF	opp	-12.5	37	33.7533	34.7902	5.89832	0.254065	0.47141	0.550442	0.974375	34.641	35.7051	5.88566
BATF	opp	-11.5	37	33.9913	34.9673	5.91331	0.2676	0.47141	0.508804	0.974375	34.8852	35.8869	5.90637
BATF	same	-11.5	39	38.8471	40.0821	6.33104	0.447805	0.511778	0.0241511	1.05951	36.6652	37.8309	6.05518
BATF	opp	-10.5	39	34.8012	35.8378	5.98647	0.209761	0.468507	0.701377	0.974375	35.7165	36.7803	5.97633
BATF	same	-10.5	40	37.8831	39.1516	6.25712	0.327344	0.491668	0.338311	1.05951	35.7554	36.9526	5.97958
BATF	same	-9.5	37	34.071	35.1621	5.92976	0.272197	0.47141	0.493955	1.05951	32.1574	33.1872	5.67075
BATF	opp	-9.5	31	35.1645	36.3053	6.02538	0.274098	0.47141	-0.69116	0.974375	36.0893	37.26	6.00744
BATF	opp	-8.5	40	35.0394	36.4915	6.04082	0.176831	0.455683	0.821175	0.974375	35.9609	37.4512	5.99674
BATF	same	-8.5	32	35.6099	36.6863	6.05692	0.308337	0.489086	-0.595998	1.05951	33.6099	34.6258	5.7974
BATF	opp	-7.5	44	38.7009	40.0713	6.33019	0.174513	0.455683	0.837121	0.974375	39.7187	41.1252	6.30227
BATF	same	-7.5	27	25.7853	26.9501	5.19135	0.356942	0.491668	0.233989	1.05951	24.337	25.4364	4.93326
BATF	opp	-6.5	24	31.7278	32.3805	5.69039	0.0957393	0.45483	-1.35805	0.974375	32.5623	33.2321	5.70633
BATF	same	-6.5	22	29.0921	30.563	5.52838	0.107309	0.45483	-1.28286	1.05951	27.4582	28.8464	5.24005
BATF	opp	-5.5	24	12.1425	12.5251	3.53909	0.000806096	0.0741608	3.35045	0.974375	12.4618	12.8545	3.53013
BATF	same	-5.5	55	47.3147	48.329	6.9519	0.118693	0.45483	1.10549	1.05951	44.6573	45.6146	6.68261
BATF	opp	-4.5	6	4.02261	4.10203	2.02535	0.113043	0.45483	0.976322	0.974375	4.1284	4.20991	2.03185
BATF	same	-4.5	92	101.252	104.254	10.2105	0.193264	0.457886	-0.906116	1.05951	95.5651	98.3987	9.77574
BATF	opp	-3.5	5	6.48513	6.6716	2.58294	0.371207	0.491668	-0.574974	0.974375	6.65568	6.84705	2.57986
BATF	same	-3.5	110	110.195	114.331	10.6926	0.517906	0.543683	-0.0182664	1.05951	104.006	107.909	10.1983
BATF	same	-2.5	82	92.4964	95.7051	9.7829	0.14886	0.45483	-1.07294	1.05951	87.3014	90.3298	9.34352
BATF	opp	-2.5	7	9.25494	9.47183	3.07763	0.294896	0.475973	-0.732685	0.974375	9.49833	9.72093	3.08194
BATF	opp	-1.5	36	27.9532	28.7365	5.36065	0.0578158	0.45483	1.5011	0.974375	28.6883	29.4923	5.35615
BATF	same	-1.5	44	44.2337	45.8959	6.77465	0.525954	0.543683	-0.0344945	1.05951	41.7493	43.3182	6.46137
BATF	same	-0.5	26	29.8646	30.536	5.52594	0.275391	0.47141	-0.699365	1.05951	28.1873	28.8209	5.30917
BATF	opp	-0.5	49	50.3677	51.8276	7.19914	0.460568	0.516735	-0.189977	0.974375	51.6923	53.1906	7.18973
BATF	same	0.5	17	39.6337	41.1945	6.4183	4.30679e-05	0.0079245	-3.52644	1.03101	37.9177	39.4109	6.15773
BATF	opp	0.5	56	53.5419	55.2003	7.42969	0.336057	0.491668	0.330851	1.01561	53.8113	55.4781	7.33562
BATF	same	1.5	20	25.8491	26.7554	5.17256	0.145096	0.45483	-1.13079	1.03101	25.0717	25.9507	5.00716
BATF	opp	1.5	80	73.9018	76.444	8.74322	0.218976	0.468507	0.697477	1.01561	72.7659	75.269	8.53029
BATF	same	2.5	20	26.1684	26.5628	5.15391	0.131758	0.45483	-1.19684	1.03101	25.3814	25.7639	5.03799
BATF	opp	2.5	0	0	0	0	1	1	0	1.01561	0	0	0
BATF	same	3.5	2	5.70902	5.8585	2.42043	0.0762841	0.45483	-1.53238	1.03101	5.53732	5.6823	2.35315
BATF	opp	3.5	0	0.0557151	0.0554462	0.23547	0.945809	0.950977	-0.236612	1.01561	0.0548587	0.054594	0.234219
BATF	opp	4.5	88	94.4587	96.6951	9.83337	0.273467	0.47141	-0.656814	1.01561	93.0068	95.2088	9.644
BATF	same	4.5	0	0.136863	0.149429	0.38656	0.87209	0.881673	-0.354053	1.03101	0.132747	0.144935	0.364344
BATF	same	5.5	1	0.763947	0.778903	0.882555	0.178311	0.455683	0.267466	1.03101	0.740971	0.755478	0.860797
BATF	opp	5.5	20	22.1212	22.0471	4.69543	0.377161	0.491668	-0.451758	1.01561	21.7812	21.7082	4.66703
BATF	opp	6.5	6	4.0374	4.09879	2.02455	0.114607	0.45483	0.969402	1.01561	3.97534	4.03579	1.99383
BATF	same	6.5	27	30.7195	30.7461	5.54492	0.28749	0.475973	-0.67079	1.03101	29.7956	29.8214	5.45853
BATF	same	7.5	77	91.4225	93.7745	9.68372	0.0697461	0.45483	-1.48935	1.03101	88.6729	90.9542	9.41663
BATF	opp	7.5	2	2.76211	2.85793	1.69054	0.478535	0.521008	-0.450807	1.01561	2.71965	2.814	1.64914
BATF	same	8.5	12	9.47887	9.73381	3.1199	0.161791	0.455683	0.808079	1.03101	9.19379	9.44106	3.03213
BATF	opp	8.5	22	21.4338	22.0356	4.69421	0.395764	0.491668	0.120623	1.01561	21.1043	21.6969	4.59394
BATF	opp	9.5	33	30.3443	30.7742	5.54745	0.276522	0.47141	0.478723	1.01561	29.8779	30.3012	5.46607
BATF	same	9.5	6	7.45395	7.62968	2.76219	0.384479	0.491668	-0.526377	1.03101	7.22977	7.40021	2.68882
BATF	same	10.5	26	36.9941	38.2547	6.18504	0.0367755	0.45483	-1.77752	1.03101	35.8815	37.1042	5.99011
BATF	opp	10.5	29	32.1652	33.1649	5.7589	0.327537	0.491668	-0.549612	1.01561	31.6708	32.6551	5.62768
BATF	opp	11.5	26	36.2697	37.508	6.12438	0.0469202	0.45483	-1.67686	1.01561	35.7122	36.9315	5.97597
BATF	same	11.5	26	33.5353	34.6637	5.88759	0.109062	0.45483	-1.27986	1.03101	32.5267	33.6212	5.70322
BATF	same	12.5	41	39.9945	41.2791	6.42488	0.396335	0.491668	0.156494	1.03101	38.7917	40.0377	6.2283
BATF	opp	12.5	34	33.5507	34.5198	5.87535	0.423922	0.498537	0.0764778	1.01561	33.035	33.9892	5.7476
BATF	same	13.5	47	42.3825	44.0846	6.63962	0.212964	0.468507	0.695448	1.03101	41.1078	42.7587	6.41154
BATF	opp	13.5	33	32.2842	33.4767	5.78591	0.404422	0.492806	0.123722	1.01561	31.7879	32.9622	5.63808
BATF	opp	14.5	27	34.9528	36.0678	6.00564	0.100185	0.45483	-1.32422	1.01561	34.4155	35.5134	5.86648
BATF	same	14.5	37	40.2405	41.6445	6.45325	0.340758	0.491668	-0.502147	1.03101	39.0302	40.392	6.24742
BATF	opp	15.5	45	36.0887	37.2775	6.10553	0.0627933	0.45483	1.45955	1.01561	35.534	36.7045	5.96104
BATF	same	15.5	42	41.4946	43.0134	6.55846	0.42807	0.498537	0.0770554	1.03101	40.2467	41.7197	6.34403
BATF	opp	16.5	32	36.5625	37.7348	6.14287	0.255684	0.47141	-0.742733	1.01561	36.0005	37.1548	6.00004
BATF	same	16.5	37	37.3753	38.635	6.21571	0.519029	0.543683	-0.0603804	1.03101	36.2512	37.4731	6.0209
BATF	opp	17.5	45	36.3649	37.5453	6.12743	0.0689118	0.45483	1.40926	1.01561	35.8059	36.9682	5.9838
BATF	same	17.5	40	37.2991	38.5509	6.20894	0.293268	0.475973	0.435003	1.03101	36.1773	37.3915	6.01476
BATF	same	18.5	46	38.9529	40.2798	6.34664	0.115263	0.45483	1.11036	1.03101	37.7814	39.0684	6.14666
BATF	opp	18.5	29	35.0878	36.2806	6.02334	0.17332	0.455683	-1.0107	1.01561	34.5484	35.723	5.87779
BATF	same	19.5	29	37.1038	38.4125	6.19778	0.102658	0.45483	-1.30753	1.03101	35.9879	37.2573	5.99899
BATF	opp	19.5	36	36.8894	38.2058	6.18109	0.485383	0.523803	-0.143891	1.01561	36.3224	37.6186	6.02681
BATF	opp	20.5	42	34.3352	35.4989	5.95809	0.0852627	0.45483	1.28645	1.01561	33.8074	34.9532	5.81442
BATF	same	20.5	33	35.6019	36.749	6.06209	0.371642	0.491668	-0.429207	1.03101	34.5312	35.6437	5.87632
BATF	opp	21.5	24	31.633	32.5843	5.70827	0.098524	0.45483	-1.33718	1.01561	31.1467	32.0835	5.58093
BATF	same	21.5	32	38.1577	39.2714	6.26669	0.180814	0.455751	-0.982611	1.03101	37.0101	38.0903	6.08359
BATF	same	22.5	44	40.9843	42.2479	6.49984	0.285247	0.475973	0.463965	1.03101	39.7517	40.9773	6.30489
BATF	opp	22.5	34	33.8677	35.137	5.92765	0.445532	0.511778	0.0223139	1.01561	33.3472	34.597	5.7747
BATF	opp	23.5	39	33.5877	34.704	5.89101	0.153796	0.45483	0.91874	1.01561	33.0714	34.1706	5.75078
BATF	same	23.5	40	38.8402	40.0529	6.32874	0.385488	0.491668	0.183261	1.03101	37.6721	38.8483	6.13776
BATF	same	24.5	47	38.8017	40.1315	6.33494	0.0846472	0.45483	1.29414	1.03101	37.6347	38.9245	6.13472
BATF	opp	24.5	32	33.3247	34.4814	5.87208	0.454476	0.513028	-0.225594	1.01561	32.8125	33.9514	5.72822
BATF	opp	25.5	27	34.8812	36.039	6.00325	0.102254	0.45483	-1.31282	1.01561	34.345	35.4851	5.86046
BATF	same	25.5	38	40.2494	41.4624	6.43913	0.400816	0.491668	-0.349334	1.03101	39.0389	40.2154	6.24811
BATF	opp	26.5	38	33.5897	34.7344	5.89359	0.196015	0.457886	0.748322	1.01561	33.0734	34.2005	5.75095
BATF	same	26.5	34	39.5215	40.9621	6.40016	0.214926	0.468507	-0.862719	1.03101	38.3329	39.7302	6.19136
BATF	same	27.5	30	38.0842	39.4477	6.28074	0.106482	0.45483	-1.28714	1.03101	36.9388	38.2613	6.07773
BATF	opp	27.5	31	36.2832	37.5428	6.12722	0.216481	0.468507	-0.862244	1.01561	35.7254	36.9657	5.97708
BATF	opp	28.5	25	37.203	38.4659	6.20209	0.0224159	0.45483	-1.96756	1.01561	36.6311	37.8747	6.05237
BATF	same	28.5	38	36.8064	38.0828	6.17112	0.380408	0.491668	0.193422	1.03101	35.6994	36.9374	5.9749
BATF	same	29.5	29	37.4161	38.6946	6.2205	0.0940995	0.45483	-1.35297	1.03101	36.2908	37.5308	6.02419
BATF	opp	29.5	41	37.1608	38.5196	6.20641	0.234074	0.47141	0.618578	1.01561	36.5897	37.9275	6.04894
BATF	same	30.5	39	36.8734	38.027	6.16661	0.324634	0.491668	0.344862	1.03101	35.7644	36.8834	5.98033
BATF	opp	30.5	35	37.2679	38.6054	6.21332	0.39577	0.491668	-0.364999	1.01561	36.695	38.012	6.05764
BATF	same	31.5	26	36.3338	37.5838	6.13057	0.0459357	0.45483	-1.68561	1.03101	35.241	36.4535	5.93641
BATF	opp	31.5	38	36.8647	38.2129	6.18166	0.384103	0.491668	0.183664	1.01561	36.298	37.6256	6.02478
BATF	same	32.5	29	36.3169	37.5548	6.1282	0.126947	0.45483	-1.19396	1.03101	35.2246	36.4254	5.93503
BATF	opp	32.5	37	37.3134	38.4275	6.19899	0.523076	0.543683	-0.0505502	1.01561	36.7398	37.8368	6.06134
BATF	same	33.5	32	38.8862	40.2453	6.34392	0.152297	0.45483	-1.08548	1.03101	37.7167	39.0349	6.14139
BATF	opp	33.5	40	38.1981	39.6922	6.30017	0.346205	0.491668	0.286015	1.01561	37.6109	39.0821	6.13277
BATF	opp	34.5	27	34.8367	36.0053	6.00044	0.103557	0.45483	-1.30602	1.01561	34.3012	35.4518	5.85672
BATF	same	34.5	32	37.912	39.0855	6.25184	0.191232	0.457886	-0.94564	1.03101	36.7718	37.91	6.06397
BATF	opp	35.5	29	35.6581	36.8202	6.06796	0.150472	0.45483	-1.09726	1.01561	35.11	36.2542	5.92537
BATF	same	35.5	39	40.0969	41.5852	6.44866	0.472876	0.521008	-0.170104	1.03101	38.891	40.3346	6.23627
BATF	opp	36.5	31	35.9551	37.1313	6.09354	0.232493	0.47141	-0.813169	1.01561	35.4024	36.5605	5.94999
BATF	same	36.5	37	39.4345	40.6781	6.37794	0.388286	0.491668	-0.381713	1.03101	38.2485	39.4547	6.18454
BATF	same	37.5	57	39.5613	40.8392	6.39055	0.00352878	0.216432	2.72882	1.03101	38.3715	39.6109	6.19448
BATF	opp	37.5	31	35.4488	36.5447	6.04522	0.258654	0.47141	-0.735915	1.01561	34.9039	35.983	5.90795
BATF	same	38.5	30	39.4873	40.9464	6.39893	0.0717855	0.45483	-1.48264	1.03101	38.2997	39.7149	6.18868
BATF	opp	38.5	36	36.0565	37.1908	6.09842	0.540422	0.549379	-0.00926562	1.01561	35.5023	36.6191	5.95838
BATF	same	39.5	37	34.9742	36.0718	6.00598	0.326339	0.491668	0.3373	1.03101	33.9223	34.9869	5.82429
BATF	opp	39.5	35	37.204	38.4499	6.2008	0.39978	0.491668	-0.355442	1.01561	36.6322	37.8589	6.05245
BATF	same	40.5	25	35.986	37.076	6.089	0.0347029	0.45483	-1.80423	1.03101	34.9037	35.9609	5.90793
BATF	opp	40.5	41	37.2865	38.456	6.20129	0.240565	0.47141	0.598825	1.01561	36.7134	37.8649	6.05916
BATF	same	41.5	45	37.8245	38.9065	6.23751	0.108351	0.45483	1.15038	1.03101	36.6869	37.7364	6.05697
BATF	opp	41.5	30	36.7204	37.9161	6.15761	0.15167	0.45483	-1.09139	1.01561	36.156	37.3333	6.01298
BATF	opp	42.5	42	35.9029	37.2731	6.10517	0.13638	0.45483	0.998678	1.01561	35.351	36.7002	5.94567
BATF	same	42.5	41	39.4855	40.7952	6.38711	0.365311	0.491668	0.237119	1.03101	38.298	39.5683	6.18853
BATF	same	43.5	43	40.107	41.4263	6.43633	0.28962	0.475973	0.44948	1.03101	38.9008	40.1804	6.23705
BATF	opp	43.5	37	35.3056	36.5133	6.04263	0.347002	0.491668	0.2804	1.01561	34.763	35.9521	5.89601
BATF	same	44.5	27	35.6939	36.8942	6.07406	0.0806788	0.45483	-1.43132	1.03101	34.6204	35.7846	5.88391
BATF	opp	44.5	29	35.2831	36.3398	6.02825	0.165229	0.455683	-1.04228	1.01561	34.7408	35.7812	5.89413
BATF	opp	45.5	28	34.517	35.7038	5.97527	0.15223	0.45483	-1.09066	1.01561	33.9864	35.155	5.82979
BATF	same	45.5	34	37.3204	38.5281	6.2071	0.329987	0.491668	-0.534934	1.03101	36.198	37.3694	6.01647
BATF	opp	46.5	43	36.8187	37.9424	6.15974	0.136352	0.45483	1.0035	1.01561	36.2528	37.3592	6.02103
BATF	same	46.5	39	39.8759	41.2754	6.4246	0.486796	0.523803	-0.136333	1.03101	38.6766	40.0341	6.21905
BCL6/2	opp	-42.5	27	20.8037	21.7722	4.66607	0.0758822	0.368629	1.32795	1.0155	20.4862	21.4399	4.52617
BCL6/2	same	-42.5	18	21.9816	22.7966	4.77458	0.233666	0.467986	-0.833925	1.05397	20.8561	21.6293	4.56684
BCL6/2	same	-41.5	15	21.5581	22.3406	4.72658	0.0907321	0.368629	-1.38749	1.05397	20.4542	21.1966	4.52263
BCL6/2	opp	-41.5	24	21.4324	22.1237	4.70359	0.247288	0.467986	0.545886	1.0155	21.1053	21.7861	4.59405
BCL6/2	opp	-40.5	26	20.6425	21.3257	4.61797	0.102078	0.368629	1.16014	1.0155	20.3275	21.0002	4.5086
BCL6/2	same	-40.5	24	21.337	22.0136	4.69187	0.240651	0.467986	0.567577	1.05397	20.2444	20.8864	4.49938
BCL6/2	same	-39.5	16	22.3744	23.1742	4.81396	0.102762	0.368629	-1.32414	1.05397	21.2287	21.9876	4.60746
BCL6/2	opp	-39.5	15	19.6958	20.2995	4.5055	0.172826	0.434533	-1.04225	1.0155	19.3953	19.9897	4.404
BCL6/2	same	-38.5	13	21.1448	21.6974	4.65804	0.040709	0.368629	-1.74855	1.05397	20.0621	20.5864	4.47907
BCL6/2	opp	-38.5	24	20.2671	21.1216	4.59583	0.172054	0.434533	0.812232	1.0155	19.9578	20.7993	4.46742
BCL6/2	same	-37.5	11	22.4383	23.1327	4.80965	0.0060238	0.368629	-2.3782	1.05397	21.2894	21.9482	4.61404
BCL6/2	opp	-37.5	26	20.4635	21.1646	4.6005	0.0949028	0.368629	1.20345	1.0155	20.1512	20.8416	4.48901
BCL6/2	opp	-36.5	24	20.0258	20.7225	4.5522	0.158215	0.434533	0.873025	1.0155	19.7202	20.4063	4.44074
BCL6/2	same	-36.5	19	22.9669	23.7304	4.87139	0.239803	0.467986	-0.814327	1.05397	21.7909	22.5153	4.66807
BCL6/2	same	-35.5	14	22.0369	22.7247	4.76704	0.0469627	0.368629	-1.68594	1.05397	20.9085	21.5611	4.57258
BCL6/2	opp	-35.5	15	19.2304	19.9827	4.4702	0.200172	0.467986	-0.946352	1.0155	18.9369	19.6777	4.35165
BCL6/2	opp	-34.5	26	19.7139	20.3118	4.50687	0.0684914	0.368629	1.39478	1.0155	19.413	20.0019	4.40602
BCL6/2	same	-34.5	24	22.5546	23.3279	4.82989	0.330437	0.505349	0.299254	1.05397	21.3997	22.1333	4.62598
BCL6/2	same	-33.5	19	23.0611	23.8045	4.87898	0.23389	0.467986	-0.832361	1.05397	21.8802	22.5856	4.67763
BCL6/2	opp	-33.5	18	20.1232	20.9145	4.57323	0.371089	0.506291	-0.464269	1.0155	19.8161	20.5953	4.45153
BCL6/2	same	-32.5	35	23.3519	24.1349	4.91273	0.00901409	0.368629	2.371	1.05397	22.1562	22.8991	4.70703
BCL6/2	opp	-32.5	18	21.1097	21.8842	4.67806	0.293551	0.496778	-0.664735	1.0155	20.7875	21.5502	4.55933
BCL6/2	opp	-31.5	20	20.362	21.1213	4.59579	0.526967	0.579112	-0.078772	1.0155	20.0513	20.7989	4.47786
BCL6/2	same	-31.5	21	21.1004	21.8587	4.67533	0.548981	0.579112	-0.0214737	1.05397	20.02	20.7394	4.47437
BCL6/2	opp	-30.5	20	20.7345	21.4391	4.63024	0.494129	0.56841	-0.158633	1.0155	20.4181	21.1119	4.51864
BCL6/2	same	-30.5	21	21.0944	21.7888	4.66785	0.549499	0.579112	-0.0202288	1.05397	20.0143	20.6731	4.47373
BCL6/2	same	-29.5	29	20.9299	21.6132	4.649	0.0361082	0.368629	1.73587	1.05397	19.8582	20.5065	4.45625
BCL6/2	opp	-29.5	23	22.074	22.8209	4.77712	0.368587	0.506291	0.19383	1.0155	21.7372	22.4726	4.66231
BCL6/2	opp	-28.5	18	20.9838	21.6893	4.65717	0.302891	0.499736	-0.640694	1.0155	20.6636	21.3582	4.54572
BCL6/2	same	-28.5	19	21.6378	22.315	4.72388	0.333306	0.505349	-0.558391	1.05397	20.5298	21.1724	4.53098
BCL6/2	same	-27.5	16	21.891	22.5483	4.7485	0.12148	0.368629	-1.24061	1.05397	20.7701	21.3937	4.55742
BCL6/2	opp	-27.5	16	19.8721	20.5052	4.52827	0.229436	0.467986	-0.855097	1.0155	19.5688	20.1923	4.42367
BCL6/2	opp	-26.5	30	22.6408	23.3659	4.83382	0.0546697	0.368629	1.52244	1.0155	22.2953	23.0093	4.72179
BCL6/2	same	-26.5	18	22.0741	22.7171	4.76624	0.227825	0.467986	-0.85478	1.05397	20.9438	21.5539	4.57644
BCL6/2	opp	-25.5	24	21.0186	21.756	4.66434	0.219078	0.467986	0.639187	1.0155	20.6978	21.424	4.54949
BCL6/2	same	-25.5	18	21.325	22.1525	4.70664	0.277966	0.489221	-0.706456	1.05397	20.2331	21.0182	4.49812
BCL6/2	same	-24.5	27	21.3321	22.0474	4.69547	0.0946821	0.368629	1.2071	1.05397	20.2398	20.9185	4.49886
BCL6/2	opp	-24.5	23	21.3844	22.031	4.69372	0.313524	0.505349	0.344198	1.0155	21.0581	21.6948	4.58891
BCL6/2	opp	-23.5	30	21.9774	22.769	4.77168	0.040071	0.368629	1.68129	1.0155	21.642	22.4215	4.6521
BCL6/2	same	-23.5	23	23.3026	24.1168	4.91088	0.530087	0.579112	-0.0616147	1.05397	22.1094	22.8819	4.70206
BCL6/2	same	-22.5	25	20.2765	20.975	4.57984	0.12494	0.372702	1.03137	1.05397	19.2383	19.9009	4.38614
BCL6/2	opp	-22.5	22	21.9369	22.7656	4.77133	0.438277	0.546356	0.0132279	1.0155	21.6021	22.4181	4.64781
BCL6/2	opp	-21.5	18	21.8303	22.5445	4.7481	0.243438	0.467986	-0.806709	1.0155	21.4972	22.2004	4.6365
BCL6/2	same	-21.5	22	19.8912	20.5474	4.53292	0.271069	0.489221	0.465212	1.05397	18.8727	19.4952	4.34427
BCL6/2	opp	-20.5	13	22.6061	23.4035	4.83772	0.0209947	0.368629	-1.98566	1.0155	22.2611	23.0464	4.71817
BCL6/2	same	-20.5	17	21.2879	21.9917	4.68953	0.209032	0.467986	-0.914353	1.05397	20.1978	20.8656	4.4942
BCL6/2	opp	-19.5	18	22.3318	23.1716	4.81369	0.212063	0.467986	-0.899899	1.0155	21.991	22.818	4.68946
BCL6/2	same	-19.5	20	21.3307	22.1208	4.70327	0.442547	0.546356	-0.28293	1.05397	20.2385	20.9881	4.49872
BCL6/2	same	-18.5	16	21.5047	22.1797	4.70953	0.138303	0.399038	-1.16883	1.05397	20.4035	21.044	4.51702
BCL6/2	opp	-18.5	23	23.6923	24.5411	4.9539	0.497966	0.569104	-0.139745	1.0155	23.3307	24.1666	4.83019
BCL6/2	same	-17.5	16	21.9034	22.6337	4.75748	0.120968	0.368629	-1.24087	1.05397	20.7819	21.4747	4.55871
BCL6/2	opp	-17.5	22	22.2253	23.0372	4.79971	0.537294	0.579112	-0.0469353	1.0155	21.8861	22.6856	4.67826
BCL6/2	same	-16.5	30	21.4143	22.112	4.70234	0.0301555	0.368629	1.82583	1.05397	20.3178	20.9798	4.50753
BCL6/2	opp	-16.5	26	20.9792	21.6926	4.65753	0.116504	0.368629	1.078	1.0155	20.659	21.3615	4.54522
BCL6/2	opp	-15.5	28	21.3081	22.0859	4.69956	0.0648543	0.368629	1.42393	1.0155	20.9829	21.7488	4.58071
BCL6/2	same	-15.5	15	20.8397	21.4944	4.63621	0.117551	0.368629	-1.25959	1.05397	19.7726	20.3938	4.44664
BCL6/2	same	-14.5	28	21.3505	22.0933	4.70035	0.066086	0.368629	1.41469	1.05397	20.2572	20.962	4.5008
BCL6/2	opp	-14.5	20	20.2259	20.8838	4.56988	0.539035	0.579112	-0.049429	1.0155	19.9172	20.5651	4.46287
BCL6/2	same	-13.5	32	21.7969	22.4589	4.73908	0.0150536	0.368629	2.15296	1.05397	20.6808	21.3089	4.54762
BCL6/2	opp	-13.5	30	21.3762	22.2337	4.71526	0.0295592	0.368629	1.82892	1.0155	21.0499	21.8944	4.58802
BCL6/2	same	-12.5	18	23.0565	23.9109	4.88988	0.171849	0.434533	-1.03408	1.05397	21.8759	22.6866	4.67717
BCL6/2	opp	-12.5	19	19.4604	20.0429	4.47693	0.518735	0.579112	-0.102828	1.0155	19.1634	19.737	4.3776
BCL6/2	same	-11.5	15	22.9813	23.7816	4.87664	0.0523908	0.368629	-1.63664	1.05397	21.8045	22.5639	4.66953
BCL6/2	opp	-11.5	17	20.794	21.4492	4.63133	0.240413	0.467986	-0.819207	1.0155	20.4767	21.1219	4.52512
BCL6/2	opp	-10.5	13	19.8717	20.5741	4.53587	0.0696865	0.368629	-1.51496	1.0155	19.5684	20.2601	4.42362
BCL6/2	same	-10.5	20	21.7317	22.4775	4.74104	0.408868	0.529123	-0.365251	1.05397	20.6189	21.3265	4.5408
BCL6/2	opp	-9.5	28	19.6887	20.3196	4.50772	0.0290278	0.368629	1.84379	1.0155	19.3882	20.0094	4.40321
BCL6/2	same	-9.5	24	23.3339	24.1341	4.91265	0.392115	0.52282	0.135582	1.05397	22.1391	22.8983	4.70522
BCL6/2	opp	-8.5	25	19.5898	20.292	4.50467	0.0948305	0.368629	1.20103	1.0155	19.2908	19.9823	4.39213
BCL6/2	same	-8.5	21	23.4433	24.3539	4.93496	0.354951	0.505349	-0.495094	1.05397	22.2429	23.1068	4.71623
BCL6/2	same	-7.5	24	21.7732	22.5734	4.75115	0.27161	0.489221	0.468688	1.05397	20.6583	21.4175	4.54514
BCL6/2	opp	-7.5	19	19.1267	19.8115	4.45101	0.549061	0.579112	-0.028473	1.0155	18.8348	19.5092	4.33991
BCL6/2	opp	-6.5	11	16.868	17.3774	4.16862	0.0894704	0.368629	-1.40767	1.0155	16.6106	17.1122	4.07561
BCL6/2	same	-6.5	20	24.3904	25.1365	5.01363	0.219082	0.467986	-0.875692	1.05397	23.1415	23.8494	4.81056
BCL6/2	same	-5.5	29	23.6322	24.4439	4.94408	0.116085	0.368629	1.08571	1.05397	22.4221	23.1923	4.73519
BCL6/2	opp	-5.5	14	12.4404	12.7589	3.57196	0.269201	0.489221	0.436609	1.0155	12.2506	12.5642	3.50008
BCL6/2	opp	-4.5	10	8.58289	8.81244	2.96858	0.245854	0.467986	0.477371	1.0155	8.4519	8.67795	2.90722
BCL6/2	same	-4.5	32	28.9927	30.3563	5.50965	0.251645	0.471165	0.545819	1.05397	27.5082	28.8019	5.24482
BCL6/2	same	-3.5	47	38.6742	40.3077	6.34883	0.0814004	0.368629	1.31138	1.05397	36.6939	38.2437	6.05755
BCL6/2	opp	-3.5	2	2.26599	2.30736	1.519	0.605076	0.630138	-0.175111	1.0155	2.23141	2.27215	1.49379
BCL6/2	opp	-2.5	1	0.51144	0.525255	0.724745	0.0936931	0.368629	0.674113	1.0155	0.503635	0.517239	0.709672
BCL6/2	same	-2.5	82	77.6377	79.7095	8.92802	0.286047	0.491932	0.488612	1.05397	73.6622	75.628	8.58267
BCL6/2	same	-1.5	82	99.6212	103.451	10.1711	0.0399594	0.368629	-1.73248	1.05397	94.5201	98.1534	9.72214
BCL6/2	opp	-1.5	0	0.0529828	0.054621	0.233711	0.948396	0.970452	-0.226702	1.0155	0.0521742	0.0537874	0.228417
BCL6/2	same	-0.5	72	103.982	107.458	10.3662	0.000577955	0.10172	-3.08522	1.05397	98.6576	101.956	9.93265
BCL6/2	opp	-0.5	0	0	0	0	1	1	0	1.0155	0	0	0
BCL6/2	same	0.5	72	73.6011	74.8848	8.6536	0.456536	0.546356	-0.185024	0.975994	72.5148	73.7795	8.51556
BCL6/2	opp	0.5	0	0	0	0	1	1	0	1.06855	0	0	0
BCL6/2	opp	1.5	1	4.13821	4.22882	2.05641	0.0819617	0.368629	-1.52606	1.06855	3.87272	3.95753	1.96792
BCL6/2	same	1.5	0	0.287547	0.293016	0.541309	0.750101	0.776575	-0.531207	0.975994	0.29462	0.300223	0.542789
BCL6/2	opp	2.5	33	42.5898	43.265	6.57762	0.0776942	0.368629	-1.45794	1.06855	39.8575	40.4894	6.31328
BCL6/2	same	2.5	0	0	0	0	1	1	0	0.975994	0	0	0
BCL6/2	opp	3.5	63	74.2172	76.6031	8.75232	0.10455	0.368629	-1.28163	1.06855	69.4558	71.6886	8.33402
BCL6/2	same	3.5	0	0	0	0	1	1	0	0.975994	0	0	0
BCL6/2	opp	4.5	116	112.419	118.85	10.9018	0.345223	0.505349	0.328479	1.06855	105.207	111.225	10.257
BCL6/2	same	4.5	0	0.161677	0.169905	0.412196	0.850716	0.875591	-0.392234	0.975994	0.165654	0.174084	0.407006
BCL6/2	opp	5.5	73	81.1366	84.0698	9.16896	0.199669	0.467986	-0.887403	1.06855	75.9313	78.6763	8.71386
BCL6/2	same	5.5	0	0.624392	0.63199	0.794978	0.535587	0.579112	-0.78542	0.975994	0.63975	0.647535	0.799844
BCL6/2	opp	6.5	53	41.6224	42.5704	6.5246	0.0369449	0.368629	1.7438	1.06855	38.9521	39.8393	6.24116
BCL6/2	same	6.5	2	3.54259	3.63513	1.9066	0.313043	0.505349	-0.809076	0.975994	3.62972	3.72454	1.90518
BCL6/2	same	7.5	15	13.6953	14.1112	3.75649	0.300862	0.499736	0.347312	0.975994	14.0322	14.4583	3.74596
BCL6/2	opp	7.5	28	29.078	30.8564	5.55485	0.469545	0.550932	-0.194072	1.06855	27.2126	28.8768	5.21657
BCL6/2	opp	8.5	19	24.9457	26.171	5.11576	0.135846	0.398482	-1.16223	1.06855	23.3453	24.492	4.8317
BCL6/2	same	8.5	15	17.3822	17.9737	4.23954	0.337625	0.505349	-0.561906	0.975994	17.8098	18.4158	4.22016
BCL6/2	same	9.5	23	18.2052	18.7755	4.33307	0.110355	0.368629	1.10656	0.975994	18.653	19.2373	4.31891
BCL6/2	opp	9.5	21	23.4411	24.3831	4.93793	0.355116	0.505349	-0.494356	1.06855	21.9372	22.8188	4.68372
BCL6/2	same	10.5	25	19.0973	19.7378	4.44272	0.0764462	0.368629	1.32863	0.975994	19.567	20.2233	4.42346
BCL6/2	opp	10.5	25	23.9169	24.6801	4.9679	0.361628	0.505349	0.218028	1.06855	22.3825	23.0967	4.73101
BCL6/2	same	11.5	18	20.6197	21.3596	4.62165	0.33085	0.505349	-0.566837	0.975994	21.1269	21.885	4.5964
BCL6/2	opp	11.5	24	23.5059	24.3432	4.93388	0.405968	0.529123	0.100149	1.06855	21.9979	22.7814	4.69019
BCL6/2	same	12.5	27	20.3765	21.1107	4.59464	0.0626892	0.368629	1.44157	0.975994	20.8777	21.6299	4.56922
BCL6/2	opp	12.5	22	23.1823	24.0382	4.90287	0.457217	0.546356	-0.241149	1.06855	21.6951	22.496	4.6578
BCL6/2	opp	13.5	25	22.7984	23.5898	4.85693	0.277744	0.489221	0.453289	1.06855	21.3358	22.0764	4.61907
BCL6/2	same	13.5	18	19.9386	20.5071	4.52848	0.386623	0.520487	-0.428083	0.975994	20.429	21.0115	4.51984
BCL6/2	same	14.5	13	18.4955	19.1316	4.37397	0.11906	0.368629	-1.2564	0.975994	18.9504	19.6022	4.35321
BCL6/2	opp	14.5	27	22.4	23.1892	4.81551	0.141348	0.401247	0.955254	1.06855	20.9629	21.7015	4.57853
BCL6/2	opp	15.5	19	22.3938	23.1203	4.80835	0.277861	0.489221	-0.70582	1.06855	20.9572	21.637	4.5779
BCL6/2	same	15.5	18	18.5575	19.1837	4.37992	0.510208	0.579112	-0.127294	0.975994	19.014	19.6556	4.3605
BCL6/2	same	16.5	22	18.8974	19.5084	4.41683	0.199976	0.467986	0.702454	0.975994	19.3622	19.9883	4.40025
BCL6/2	opp	16.5	22	22.291	22.9695	4.79265	0.531736	0.579112	-0.0607126	1.06855	20.8609	21.4959	4.56737
BCL6/2	same	17.5	27	19.9719	20.6864	4.54824	0.0517702	0.368629	1.54524	0.975994	20.4631	21.1953	4.52362
BCL6/2	opp	17.5	21	20.4564	21.1572	4.5997	0.395292	0.523093	0.118176	1.06855	19.1441	19.7999	4.37539
BCL6/2	opp	18.5	26	20.2997	20.9802	4.58041	0.0886325	0.368629	1.24449	1.06855	18.9974	19.6342	4.3586
BCL6/2	same	18.5	19	21.2403	21.9023	4.67999	0.364655	0.505349	-0.478689	0.975994	21.7627	22.441	4.66505
BCL6/2	opp	19.5	15	21.3052	22.0551	4.69628	0.0995339	0.368629	-1.3426	1.06855	19.9384	20.6401	4.46525
BCL6/2	same	19.5	21	21.7448	22.5369	4.7473	0.493381	0.56841	-0.156891	0.975994	22.2797	23.0912	4.72013
BCL6/2	opp	20.5	24	22.5665	23.3171	4.82877	0.331356	0.505349	0.29687	1.06855	21.1187	21.8212	4.59551
BCL6/2	same	20.5	21	22.1445	22.9145	4.78691	0.459436	0.546356	-0.239099	0.975994	22.6892	23.4781	4.76332
BCL6/2	same	21.5	13	20.8646	21.711	4.6595	0.0459727	0.368629	-1.68786	0.975994	21.3778	22.245	4.62361
BCL6/2	opp	21.5	20	22.2812	23.044	4.80042	0.364467	0.505349	-0.475205	1.06855	20.8517	21.5657	4.56637
BCL6/2	opp	22.5	18	23.0651	23.8433	4.88296	0.171409	0.434533	-1.0373	1.06855	21.5853	22.3136	4.646
BCL6/2	same	22.5	18	20.4402	21.0969	4.59314	0.345127	0.505349	-0.531277	0.975994	20.943	21.6159	4.57635
BCL6/2	opp	23.5	29	22.4558	23.2681	4.8237	0.0733693	0.368629	1.35667	1.06855	21.0152	21.7753	4.58423
BCL6/2	same	23.5	23	20.9574	21.5283	4.63986	0.280756	0.489239	0.440234	0.975994	21.4729	22.0579	4.63388
BCL6/2	opp	24.5	19	23.0818	23.9588	4.89477	0.2326	0.467986	-0.833914	1.06855	21.601	22.4217	4.64769
BCL6/2	same	24.5	21	20.6538	21.4382	4.63014	0.412326	0.529703	0.0747649	0.975994	21.1618	21.9655	4.6002
BCL6/2	opp	25.5	28	22.4578	23.2	4.81663	0.10432	0.368629	1.15064	1.06855	21.017	21.7116	4.58443
BCL6/2	same	25.5	22	20.6318	21.4695	4.63352	0.329366	0.505349	0.295289	0.975994	21.1392	21.9976	4.59774
BCL6/2	same	26.5	25	21.0041	21.6752	4.65566	0.162529	0.434533	0.858281	0.975994	21.5208	22.2083	4.63905
BCL6/2	opp	26.5	22	20.7577	21.5011	4.63693	0.339611	0.505349	0.267922	1.06855	19.426	20.1218	4.40749
BCL6/2	same	27.5	29	20.2778	20.9821	4.58062	0.0255175	0.368629	1.90416	0.975994	20.7765	21.4982	4.55813
BCL6/2	opp	27.5	20	21.2754	21.9655	4.68674	0.447263	0.546356	-0.272129	1.06855	19.9105	20.5563	4.46212
BCL6/2	same	28.5	20	19.3959	20.0019	4.47235	0.387408	0.520487	0.135073	0.975994	19.873	20.4939	4.45791
BCL6/2	opp	28.5	22	21.7301	22.4217	4.73516	0.420769	0.532772	0.0569975	1.06855	20.336	20.9832	4.50955
BCL6/2	opp	29.5	22	23.2171	24.0379	4.90284	0.454358	0.546356	-0.248254	1.06855	21.7277	22.4957	4.66129
BCL6/2	same	29.5	18	18.9102	19.5848	4.42548	0.477687	0.556774	-0.20567	0.975994	19.3753	20.0666	4.40174
BCL6/2	opp	30.5	15	22.3366	23.1098	4.80727	0.0675761	0.368629	-1.52615	1.06855	20.9036	21.6272	4.57205
BCL6/2	same	30.5	22	18.6865	19.3097	4.39428	0.186192	0.461546	0.754049	0.975994	19.1461	19.7847	4.37563
BCL6/2	opp	31.5	15	21.1275	21.8714	4.67668	0.10613	0.368629	-1.31022	1.06855	19.772	20.4682	4.44658
BCL6/2	same	31.5	19	20.3161	20.9503	4.57715	0.442416	0.546356	-0.287546	0.975994	20.8159	21.4656	4.56244
BCL6/2	same	32.5	22	20.957	21.6189	4.64961	0.35599	0.505349	0.224315	0.975994	21.4725	22.1506	4.63384
BCL6/2	opp	32.5	22	22.0423	22.7758	4.7724	0.552795	0.579118	-0.00885469	1.06855	20.6281	21.3146	4.54182
BCL6/2	same	33.5	28	20.9223	21.5815	4.64559	0.0543628	0.368629	1.52353	0.975994	21.4369	22.1124	4.63
BCL6/2	opp	33.5	19	22.251	23.1238	4.80872	0.287892	0.491932	-0.67606	1.06855	20.8235	21.6403	4.56328
BCL6/2	same	34.5	18	20.9715	21.6889	4.65713	0.303817	0.499736	-0.638046	0.975994	21.4873	22.2223	4.63544
BCL6/2	opp	34.5	21	22.03	22.7408	4.76873	0.4691	0.550932	-0.215994	1.06855	20.6167	21.2819	4.54056
BCL6/2	opp	35.5	26	20.7537	21.4722	4.63381	0.106708	0.368629	1.13218	1.06855	19.4222	20.0947	4.40707
BCL6/2	same	35.5	20	20.4652	21.1597	4.59996	0.517842	0.579112	-0.101127	0.975994	20.9686	21.6801	4.57914
BCL6/2	same	36.5	25	21.6811	22.4747	4.74075	0.202515	0.467986	0.700082	0.975994	22.2144	23.0275	4.71321
BCL6/2	opp	36.5	20	20.1613	20.7702	4.55743	0.544762	0.579112	-0.0354034	1.06855	18.8679	19.4377	4.34372
BCL6/2	same	37.5	27	21.4414	22.1737	4.7089	0.0989214	0.368629	1.18046	0.975994	21.9687	22.7191	4.68708
BCL6/2	opp	37.5	18	21.8361	22.5646	4.75022	0.243061	0.467986	-0.807562	1.06855	20.4352	21.117	4.52053
BCL6/2	opp	38.5	30	21.2185	21.9258	4.6825	0.0271901	0.368629	1.87538	1.06855	19.8572	20.5192	4.45615
BCL6/2	same	38.5	20	21.5987	22.4459	4.73771	0.41993	0.532772	-0.337438	0.975994	22.1299	22.9979	4.70425
BCL6/2	opp	39.5	25	20.0358	20.6616	4.5455	0.113788	0.368629	1.09211	1.06855	18.7504	19.3361	4.33017
BCL6/2	same	39.5	17	20.8556	21.4978	4.63657	0.236335	0.467986	-0.831572	0.975994	21.3686	22.0265	4.62262
BCL6/2	opp	40.5	24	20.2676	21.0507	4.5881	0.172082	0.434533	0.813497	1.06855	18.9673	19.7002	4.35515
BCL6/2	same	40.5	19	20.7344	21.3792	4.62377	0.406469	0.529123	-0.375095	0.975994	21.2444	21.9051	4.60916
BCL6/2	opp	41.5	16	21.0066	21.7121	4.65963	0.16258	0.434533	-1.07445	1.06855	19.6589	20.3192	4.43383
BCL6/2	same	41.5	18	21.8025	22.5339	4.74699	0.245264	0.467986	-0.801036	0.975994	22.3388	23.0882	4.72639
BCL6/2	same	42.5	19	21.6698	22.4906	4.74243	0.330845	0.505349	-0.562954	0.975994	22.2028	23.0438	4.71198
BCL6/2	opp	42.5	21	22.1896	22.9275	4.78826	0.455647	0.546356	-0.248448	1.06855	20.7661	21.4566	4.55698
BCL6/2	opp	43.5	12	22.7637	23.4571	4.84325	0.0102961	0.368629	-2.22241	1.06855	21.3033	21.9522	4.61555
BCL6/2	same	43.5	30	19.7462	20.4709	4.52448	0.0114878	0.368629	2.26629	0.975994	20.2319	20.9744	4.49799
BCL6/2	same	44.5	21	19.7011	20.3411	4.51011	0.331219	0.505349	0.288005	0.975994	20.1856	20.8414	4.49284
BCL6/2	opp	44.5	20	22.3804	23.2491	4.82173	0.356697	0.505349	-0.49368	1.06855	20.9446	21.7576	4.57653
CCAAT/CEBP	same	-41.5	37	27.2512	28.069	5.29802	0.0296109	0.219451	1.84009	1.04385	26.1063	26.8898	5.10943
CCAAT/CEBP	opp	-41.5	33	32.2426	33.4111	5.78024	0.401569	0.47905	0.13103	1.00895	31.9566	33.1148	5.65302
CCAAT/CEBP	same	-40.5	12	27.6445	28.607	5.34855	0.000696474	0.0569051	-2.92499	1.04385	26.4831	27.4051	5.14617
CCAAT/CEBP	opp	-40.5	36	30.9606	32.0727	5.66328	0.159363	0.407995	0.889833	1.00895	30.686	31.7882	5.5395
CCAAT/CEBP	opp	-39.5	35	29.7925	30.8611	5.55528	0.148147	0.407995	0.937389	1.00895	29.5283	30.5874	5.43399
CCAAT/CEBP	same	-39.5	28	26.9427	27.8473	5.27706	0.371024	0.47905	0.200364	1.04385	25.8107	26.6774	5.08043
CCAAT/CEBP	opp	-38.5	34	27.3225	28.2958	5.31938	0.0885867	0.338598	1.25532	1.00895	27.0801	28.0448	5.20386
CCAAT/CEBP	same	-38.5	30	29.2568	30.2693	5.50176	0.397835	0.47905	0.13508	1.04385	28.0277	28.9977	5.29412
CCAAT/CEBP	opp	-37.5	30	27.445	28.3503	5.3245	0.272867	0.446703	0.47985	1.00895	27.2016	28.0988	5.21552
CCAAT/CEBP	same	-37.5	26	29.6574	30.6098	5.53261	0.287998	0.454027	-0.661068	1.04385	28.4115	29.3238	5.33024
CCAAT/CEBP	same	-36.5	28	29.9319	31.0866	5.57553	0.407878	0.47905	-0.346488	1.04385	28.6744	29.7806	5.35484
CCAAT/CEBP	opp	-36.5	29	29.0253	30.1063	5.48692	0.547303	0.565433	-0.00460794	1.00895	28.7678	29.8392	5.36357
CCAAT/CEBP	opp	-35.5	39	29.0314	29.9959	5.47685	0.0307254	0.219451	1.82013	1.00895	28.7739	29.7299	5.36413
CCAAT/CEBP	same	-35.5	29	27.4812	28.4254	5.33155	0.340146	0.47905	0.284868	1.04385	26.3267	27.2312	5.13095
CCAAT/CEBP	same	-34.5	38	27.1544	28.0523	5.29644	0.0188841	0.191382	2.04771	1.04385	26.0136	26.8737	5.10035
CCAAT/CEBP	opp	-34.5	37	29.799	30.8198	5.55156	0.0830027	0.324465	1.29712	1.00895	29.5347	30.5465	5.43458
CCAAT/CEBP	same	-33.5	20	30.1798	31.1645	5.58252	0.0329441	0.219451	-1.82352	1.04385	28.9119	29.8552	5.37698
CCAAT/CEBP	opp	-33.5	20	28.6388	29.7135	5.45101	0.0582059	0.250286	-1.58481	1.00895	28.3848	29.45	5.32774
CCAAT/CEBP	opp	-32.5	34	28.7659	29.7497	5.45433	0.143103	0.403922	0.959618	1.00895	28.5108	29.4858	5.33955
CCAAT/CEBP	same	-32.5	30	30.1157	31.156	5.58176	0.539949	0.562856	-0.0207268	1.04385	28.8505	29.8471	5.37126
CCAAT/CEBP	same	-31.5	24	29.7826	30.7341	5.54383	0.166704	0.409616	-1.04307	1.04385	28.5314	29.4429	5.34148
CCAAT/CEBP	opp	-31.5	28	26.8395	27.7559	5.26839	0.36344	0.47905	0.220281	1.00895	26.6014	27.5097	5.15766
CCAAT/CEBP	opp	-30.5	22	26.2488	27.2394	5.21914	0.236774	0.446703	-0.814084	1.00895	26.016	26.9978	5.10059
CCAAT/CEBP	same	-30.5	30	31.9096	33.0334	5.74747	0.412324	0.47905	-0.332253	1.04385	30.569	31.6456	5.52893
CCAAT/CEBP	same	-29.5	33	29.4736	30.4162	5.51508	0.224881	0.435469	0.639416	1.04385	28.2353	29.1383	5.31369
CCAAT/CEBP	opp	-29.5	32	28.547	29.6346	5.44377	0.22533	0.435469	0.634299	1.00895	28.2938	29.3717	5.31919
CCAAT/CEBP	same	-28.5	40	29.2581	30.2899	5.50362	0.02318	0.199348	1.95179	1.04385	28.0289	29.0173	5.29423
CCAAT/CEBP	opp	-28.5	29	30.5509	31.6696	5.62757	0.436128	0.480859	-0.275598	1.00895	30.28	31.3887	5.50272
CCAAT/CEBP	same	-27.5	36	31.0149	32.1015	5.66582	0.161813	0.407995	0.879851	1.04385	29.7119	30.7529	5.45086
CCAAT/CEBP	opp	-27.5	32	28.1257	29.0323	5.38816	0.201721	0.427483	0.719045	1.00895	27.8762	28.7747	5.27979
CCAAT/CEBP	opp	-26.5	26	25.6308	26.4235	5.14038	0.419325	0.47905	0.071832	1.00895	25.4034	26.1891	5.04018
CCAAT/CEBP	same	-26.5	31	30.537	31.6315	5.62419	0.419382	0.47905	0.0823187	1.04385	29.2541	30.3026	5.40871
CCAAT/CEBP	same	-25.5	22	28.7273	29.627	5.44307	0.119869	0.385698	-1.23594	1.04385	27.5204	28.3823	5.24599
CCAAT/CEBP	opp	-25.5	31	27.1399	28.0429	5.29555	0.198438	0.427199	0.728935	1.00895	26.8992	27.7942	5.18644
CCAAT/CEBP	same	-24.5	19	28.2488	29.209	5.40454	0.04355	0.234081	-1.7113	1.04385	27.062	27.9819	5.20211
CCAAT/CEBP	opp	-24.5	25	27.446	28.334	5.32297	0.365561	0.47905	-0.459526	1.00895	27.2026	28.0827	5.21561
CCAAT/CEBP	same	-23.5	32	28.2333	29.2441	5.40778	0.207626	0.427483	0.69654	1.04385	27.0471	28.0155	5.20068
CCAAT/CEBP	opp	-23.5	24	28.5532	29.4489	5.42668	0.227987	0.435709	-0.839039	1.00895	28.2999	29.1877	5.31977
CCAAT/CEBP	opp	-22.5	19	28.408	29.3963	5.42183	0.0410016	0.234081	-1.7352	1.00895	28.156	29.1355	5.30622
CCAAT/CEBP	same	-22.5	31	30.2657	31.27	5.59196	0.400107	0.47905	0.131319	1.04385	28.9941	29.9563	5.38462
CCAAT/CEBP	same	-21.5	26	29.786	30.7258	5.54309	0.280139	0.450317	-0.683006	1.04385	28.5346	29.435	5.34178
CCAAT/CEBP	opp	-21.5	28	29.5975	30.7955	5.54937	0.431702	0.47905	-0.287869	1.00895	29.335	30.5223	5.41618
CCAAT/CEBP	same	-20.5	31	29.3358	30.3315	5.5074	0.335301	0.47905	0.302172	1.04385	28.1034	29.0572	5.30126
CCAAT/CEBP	opp	-20.5	27	29.4637	30.4417	5.5174	0.368919	0.47905	-0.446536	1.00895	29.2024	30.1717	5.40392
CCAAT/CEBP	same	-19.5	25	30.5921	31.6386	5.62482	0.179582	0.411841	-0.994186	1.04385	29.3069	30.3094	5.41358
CCAAT/CEBP	opp	-19.5	31	29.6372	30.5795	5.52987	0.356028	0.47905	0.246442	1.00895	29.3743	30.3082	5.41981
CCAAT/CEBP	opp	-18.5	25	29.2575	30.2484	5.49986	0.248654	0.446703	-0.774104	1.00895	28.998	29.9801	5.38497
CCAAT/CEBP	same	-18.5	25	28.8885	29.8893	5.46711	0.270399	0.446703	-0.711246	1.04385	27.6748	28.6336	5.26068
CCAAT/CEBP	opp	-17.5	21	30.0487	31.0541	5.57262	0.0535169	0.247424	-1.62378	1.00895	29.7822	30.7787	5.45731
CCAAT/CEBP	same	-17.5	23	25.8196	26.5531	5.15297	0.333554	0.47905	-0.547178	1.04385	24.7349	25.4376	4.97342
CCAAT/CEBP	opp	-16.5	41	29.2923	30.3371	5.50791	0.0157699	0.191382	2.12562	1.00895	29.0324	30.068	5.38818
CCAAT/CEBP	same	-16.5	32	25.9538	26.7106	5.16823	0.102486	0.369869	1.16987	1.04385	24.8635	25.5884	4.98633
CCAAT/CEBP	opp	-15.5	34	28.3584	29.379	5.42024	0.126024	0.385698	1.04084	1.00895	28.1069	29.1184	5.30159
CCAAT/CEBP	same	-15.5	23	25.4925	26.3685	5.13503	0.357064	0.47905	-0.485386	1.04385	24.4215	25.2608	4.94181
CCAAT/CEBP	opp	-14.5	36	27.4421	28.4134	5.33042	0.046923	0.244568	1.60548	1.00895	27.1987	28.1614	5.21524
CCAAT/CEBP	same	-14.5	27	27.3919	28.3857	5.32782	0.520976	0.549741	-0.0735563	1.04385	26.2411	27.1931	5.12261
CCAAT/CEBP	same	-13.5	30	27.1365	28.0455	5.2958	0.253198	0.446703	0.540703	1.04385	25.9965	26.8673	5.09867
CCAAT/CEBP	opp	-13.5	24	27.8616	28.8186	5.3683	0.268301	0.446703	-0.719343	1.00895	27.6145	28.563	5.25495
CCAAT/CEBP	same	-12.5	28	25.2268	26.1747	5.11612	0.251125	0.446703	0.542061	1.04385	24.1669	25.075	4.91599
CCAAT/CEBP	opp	-12.5	29	26.5108	27.402	5.23469	0.273574	0.446703	0.475516	1.00895	26.2757	27.1589	5.12598
CCAAT/CEBP	opp	-11.5	36	30.5909	31.5778	5.61941	0.143252	0.403922	0.96258	1.00895	30.3195	31.2977	5.50632
CCAAT/CEBP	same	-11.5	20	25.6628	26.4966	5.14748	0.153338	0.407995	-1.10011	1.04385	24.5846	25.3834	4.95829
CCAAT/CEBP	same	-10.5	36	27.03	27.8941	5.28149	0.0393142	0.234081	1.69838	1.04385	25.8945	26.7222	5.08866
CCAAT/CEBP	opp	-10.5	28	30.8665	31.8543	5.64396	0.344186	0.47905	-0.507897	1.00895	30.5928	31.5718	5.53107
CCAAT/CEBP	opp	-9.5	32	29.1116	29.8522	5.46372	0.258878	0.446703	0.528656	1.00895	28.8534	29.5874	5.37153
CCAAT/CEBP	same	-9.5	24	26.1848	26.9847	5.19468	0.38217	0.47905	-0.420583	1.04385	25.0847	25.8511	5.00846
CCAAT/CEBP	same	-8.5	27	25.195	25.9825	5.0973	0.313725	0.469224	0.354106	1.04385	24.1365	24.8909	4.91289
CCAAT/CEBP	opp	-8.5	27	28.6621	29.6202	5.44244	0.425799	0.47905	-0.305399	1.00895	28.4079	29.3575	5.32991
CCAAT/CEBP	opp	-7.5	27	32.3889	33.766	5.81085	0.197128	0.427199	-0.92738	1.00895	32.1016	33.4665	5.66583
CCAAT/CEBP	same	-7.5	27	25.0087	26.1831	5.11694	0.300432	0.457295	0.389152	1.04385	23.9581	25.0831	4.8947
CCAAT/CEBP	opp	-6.5	48	38.3797	39.8482	6.31255	0.0554012	0.247424	1.524	1.00895	38.0393	39.4948	6.1676
CCAAT/CEBP	same	-6.5	26	22.6586	23.2927	4.82625	0.206133	0.427483	0.692339	1.04385	21.7067	22.3141	4.65904
CCAAT/CEBP	same	-5.5	17	24.4497	25.2759	5.02751	0.0741309	0.303584	-1.48179	1.04385	23.4225	24.214	4.83968
CCAAT/CEBP	opp	-5.5	36	31.0558	31.9005	5.64806	0.163673	0.407995	0.875381	1.00895	30.7803	31.6176	5.548
CCAAT/CEBP	same	-4.5	9	13.9325	14.9761	3.86989	0.112634	0.379864	-1.27458	1.04385	13.3472	14.3469	3.65338
CCAAT/CEBP	opp	-4.5	48	43.0028	44.2679	6.65341	0.198697	0.427199	0.751077	1.00895	42.6213	43.8753	6.5285
CCAAT/CEBP	opp	-3.5	3	0.64735	0.651281	0.80702	0.00438482	0.107741	2.91523	1.00895	0.641609	0.645504	0.801005
CCAAT/CEBP	same	-3.5	22	16.2218	16.5784	4.07166	0.065401	0.274365	1.41914	1.04385	15.5402	15.8819	3.94211
CCAAT/CEBP	same	-2.5	54	76.7666	79.6338	8.92378	0.00388519	0.107741	-2.55123	1.04385	73.5415	76.2882	8.57564
CCAAT/CEBP	opp	-2.5	0	0.137557	0.14137	0.375992	0.871485	0.886955	-0.365851	1.00895	0.136337	0.140116	0.369238
CCAAT/CEBP	opp	-1.5	20	36.7436	37.8892	6.15542	0.00189057	0.0650357	-2.72014	1.00895	36.4177	37.5531	6.03471
CCAAT/CEBP	same	-1.5	4	11.405	12.155	3.4864	0.0114698	0.164401	-2.12398	1.04385	10.9259	11.6443	3.30543
CCAAT/CEBP	same	-0.5	13	9.60165	10.1523	3.18626	0.108254	0.372393	1.06656	1.04385	9.19826	9.72576	3.03286
CCAAT/CEBP	opp	-0.5	15	19.6761	19.85	4.45534	0.173927	0.411841	-1.04955	1.00895	19.5016	19.674	4.41606
CCAAT/CEBP	opp	0.5	12	9.47275	9.5483	3.09003	0.161278	0.407995	0.81787	1.11568	8.91709	8.98821	2.98615
CCAAT/CEBP	same	0.5	0	0	0	0	1	1	0	0.941079	0	0	0
CCAAT/CEBP	opp	1.5	9	13.2232	14.4247	3.79798	0.151571	0.407995	-1.11195	1.11568	11.8521	12.9291	3.44269
CCAAT/CEBP	same	1.5	0	0	0	0	1	1	0	0.941079	0	0	0
CCAAT/CEBP	same	2.5	2	3.80325	3.96816	1.99202	0.268372	0.446703	-0.905235	0.941079	4.04137	4.21661	2.01032
CCAAT/CEBP	opp	2.5	10	12.0337	12.345	3.51355	0.343706	0.47905	-0.578817	1.11568	10.786	11.065	3.2842
CCAAT/CEBP	opp	3.5	69	103.734	106.589	10.3242	0.000185466	0.0319001	-3.36429	1.11568	92.978	95.5374	9.64251
CCAAT/CEBP	same	3.5	0	0	0	0	1	1	0	0.941079	0	0	0
CCAAT/CEBP	opp	4.5	14	17.8823	18.2689	4.27421	0.215887	0.435469	-0.908302	1.11568	16.0282	16.3747	4.00352
CCAAT/CEBP	same	4.5	0	0.160923	0.162197	0.402736	0.851357	0.871628	-0.399575	0.941079	0.170999	0.172352	0.41352
CCAAT/CEBP	opp	5.5	10	17.3151	18.8817	4.3453	0.0423315	0.234081	-1.68345	1.11568	15.5198	16.9239	3.93951
CCAAT/CEBP	same	5.5	39	31.4207	32.4276	5.69452	0.0786742	0.314697	1.33098	0.941079	33.3879	34.4578	5.77823
CCAAT/CEBP	opp	6.5	20	33.9365	35.1214	5.92633	0.0069443	0.149303	-2.35163	1.11568	30.4178	31.4799	5.51524
CCAAT/CEBP	same	6.5	27	25.5125	26.1416	5.11289	0.336782	0.47905	0.290934	0.941079	27.1098	27.7784	5.20671
CCAAT/CEBP	same	7.5	43	31.0797	32.0013	5.65697	0.0166645	0.191382	2.10718	0.941079	33.0256	34.0049	5.74679
CCAAT/CEBP	opp	7.5	28	26.089	26.8294	5.17971	0.309486	0.466944	0.368944	1.11568	23.3839	24.0476	4.8357
CCAAT/CEBP	opp	8.5	17	29.266	30.4739	5.52032	0.0102009	0.164401	-2.22197	1.11568	26.2315	27.3142	5.12167
CCAAT/CEBP	same	8.5	29	27.4382	28.5609	5.34424	0.337098	0.47905	0.292249	0.941079	29.1561	30.3491	5.39963
CCAAT/CEBP	opp	9.5	23	29.6297	30.5972	5.53147	0.127819	0.385698	-1.19854	1.11568	26.5575	27.4247	5.1534
CCAAT/CEBP	same	9.5	25	26.5744	27.5425	5.2481	0.429695	0.47905	-0.300002	0.941079	28.2383	29.267	5.31397
CCAAT/CEBP	same	10.5	34	25.9829	26.785	5.17542	0.0524635	0.247424	1.54907	0.941079	27.6097	28.462	5.25449
CCAAT/CEBP	opp	10.5	29	28.4442	29.3861	5.42089	0.409849	0.47905	0.102522	1.11568	25.495	26.3392	5.04926
CCAAT/CEBP	opp	11.5	41	31.039	32.0378	5.66019	0.0348961	0.222301	1.75984	1.11568	27.8207	28.7159	5.27453
CCAAT/CEBP	same	11.5	26	26.9673	27.7712	5.26984	0.476909	0.512677	-0.18355	0.941079	28.6557	29.5099	5.3531
CCAAT/CEBP	same	12.5	35	28.711	29.7296	5.45248	0.10537	0.369869	1.15342	0.941079	30.5086	31.5909	5.52346
CCAAT/CEBP	opp	12.5	32	31.0381	32.0442	5.66076	0.385839	0.47905	0.169928	1.11568	27.8199	28.7217	5.27446
CCAAT/CEBP	same	13.5	34	23.8529	24.6198	4.96184	0.0190274	0.191382	2.04503	0.941079	25.3463	26.1613	5.03452
CCAAT/CEBP	opp	13.5	25	30.9706	31.9176	5.64957	0.162736	0.407995	-1.05683	1.11568	27.7594	28.6083	5.26872
CCAAT/CEBP	opp	14.5	39	30.1326	31.1318	5.57959	0.0487679	0.246708	1.58925	1.11568	27.0083	27.9039	5.19695
CCAAT/CEBP	same	14.5	21	24.8073	25.5231	5.05204	0.259391	0.446703	-0.753619	0.941079	26.3605	27.1211	5.13425
CCAAT/CEBP	same	15.5	31	25.9049	26.7403	5.1711	0.136826	0.403922	0.985297	0.941079	27.5268	28.4145	5.2466
CCAAT/CEBP	opp	15.5	31	29.7522	30.7177	5.54236	0.364015	0.47905	0.225144	1.11568	26.6673	27.5328	5.16404
CCAAT/CEBP	same	16.5	23	23.7803	24.6544	4.96532	0.490759	0.521053	-0.15714	0.941079	25.2691	26.198	5.02684
CCAAT/CEBP	opp	16.5	29	29.0024	29.8846	5.46668	0.548996	0.565433	-0.000433751	1.11568	25.9953	26.7861	5.09856
CCAAT/CEBP	opp	17.5	19	30.2146	31.2161	5.58714	0.0200284	0.191382	-2.00722	1.11568	27.0818	27.9795	5.20402
CCAAT/CEBP	same	17.5	24	25.6006	26.5238	5.15013	0.426314	0.47905	-0.310785	0.941079	27.2034	28.1845	5.21569
CCAAT/CEBP	opp	18.5	23	29.3473	30.3667	5.5106	0.138624	0.403922	-1.15184	1.11568	26.3045	27.2181	5.12879
CCAAT/CEBP	same	18.5	22	24.0785	24.8528	4.98525	0.385613	0.47905	-0.416932	0.941079	25.5861	26.4088	5.05827
CCAAT/CEBP	opp	19.5	36	32.8488	33.8891	5.82143	0.256419	0.446703	0.541312	1.11568	29.4429	30.3753	5.42613
CCAAT/CEBP	same	19.5	26	23.9696	24.7784	4.97779	0.293999	0.454027	0.407887	0.941079	25.4704	26.3298	5.04682
CCAAT/CEBP	opp	20.5	44	32.4596	33.6562	5.80139	0.0213174	0.192978	1.98924	1.11568	29.0941	30.1665	5.39389
CCAAT/CEBP	same	20.5	17	25.1986	26.0082	5.09982	0.0561019	0.247424	-1.60763	0.941079	26.7763	27.6365	5.17458
CCAAT/CEBP	opp	21.5	35	31.2826	32.3123	5.68439	0.221468	0.435469	0.653966	1.11568	28.0391	28.962	5.29519
CCAAT/CEBP	same	21.5	23	26.7837	27.7133	5.26434	0.26924	0.446703	-0.718751	0.941079	28.4607	29.4484	5.33486
CCAAT/CEBP	opp	22.5	34	31.2733	32.3206	5.68512	0.275294	0.446703	0.479612	1.11568	28.0308	28.9695	5.29441
CCAAT/CEBP	same	22.5	29	26.7242	27.6695	5.26018	0.287784	0.454027	0.432647	0.941079	28.3974	29.4019	5.32892
CCAAT/CEBP	opp	23.5	19	31.5649	32.6664	5.71546	0.0113034	0.164401	-2.19841	1.11568	28.2921	29.2794	5.31903
CCAAT/CEBP	same	23.5	17	28.0637	29.0651	5.3912	0.0174233	0.191382	-2.05217	0.941079	29.8207	30.8848	5.46084
CCAAT/CEBP	same	24.5	30	26.019	26.8089	5.17773	0.187585	0.419022	0.768864	0.941079	27.6481	28.4874	5.25814
CCAAT/CEBP	opp	24.5	32	30.7603	31.9609	5.65339	0.366676	0.47905	0.219287	1.11568	27.5709	28.647	5.2508
CCAAT/CEBP	opp	25.5	15	31.2574	32.246	5.67856	0.000992531	0.0569051	-2.86294	1.11568	28.0165	28.9026	5.29306
CCAAT/CEBP	same	25.5	27	24.941	25.7665	5.07607	0.295646	0.454027	0.405631	0.941079	26.5025	27.3797	5.14806
CCAAT/CEBP	opp	26.5	26	31.8702	33.0023	5.74476	0.171188	0.411841	-1.02183	1.11568	28.5657	29.5805	5.34469
CCAAT/CEBP	same	26.5	19	23.3235	24.0608	4.90518	0.217927	0.435469	-0.881412	0.941079	24.7838	25.5672	4.97833
CCAAT/CEBP	opp	27.5	34	32.8055	33.82	5.81549	0.373608	0.47905	0.205407	1.11568	29.404	30.3134	5.42255
CCAAT/CEBP	same	27.5	24	23.7085	24.516	4.95136	0.422359	0.47905	0.0588692	0.941079	25.1929	26.051	5.01925
CCAAT/CEBP	same	28.5	19	26.1915	27.1343	5.20906	0.0908121	0.339558	-1.38058	0.941079	27.8314	28.8331	5.27555
CCAAT/CEBP	opp	28.5	30	31.9476	33.0012	5.74467	0.409726	0.47905	-0.339022	1.11568	28.6351	29.5795	5.35118
CCAAT/CEBP	same	29.5	35	29.2231	30.2707	5.50188	0.124493	0.385698	1.04999	0.941079	31.0528	32.1659	5.5725
CCAAT/CEBP	opp	29.5	32	31.0241	31.9899	5.65596	0.384871	0.47905	0.172544	1.11568	27.8074	28.6731	5.27327
CCAAT/CEBP	opp	30.5	21	31.8609	32.817	5.72862	0.0274277	0.214435	-1.89591	1.11568	28.5574	29.4144	5.34392
CCAAT/CEBP	same	30.5	27	27.2551	28.3233	5.32197	0.531425	0.557349	-0.0479334	0.941079	28.9615	30.0967	5.38159
CCAAT/CEBP	same	31.5	18	24.1967	25.0022	5.00022	0.120381	0.385698	-1.23929	0.941079	25.7117	26.5676	5.07067
CCAAT/CEBP	opp	31.5	28	32.1202	33.2842	5.76925	0.267218	0.446703	-0.71416	1.11568	28.7898	29.8331	5.36561
CCAAT/CEBP	opp	32.5	22	32.5553	33.6283	5.79899	0.0331728	0.219451	-1.8202	1.11568	29.1798	30.1416	5.40183
CCAAT/CEBP	same	32.5	23	24.0873	24.9313	4.99313	0.46578	0.503862	-0.217756	0.941079	25.5954	26.4923	5.05919
CCAAT/CEBP	same	33.5	28	24.547	25.3103	5.03093	0.208771	0.427483	0.686352	0.941079	26.0839	26.8949	5.10724
CCAAT/CEBP	opp	33.5	35	33.8453	35.0056	5.91655	0.378029	0.47905	0.195157	1.11568	30.3361	31.376	5.50782
CCAAT/CEBP	opp	34.5	23	34.3714	35.5487	5.96228	0.0263445	0.214435	-1.90722	1.11568	30.8076	31.8629	5.55046
CCAAT/CEBP	same	34.5	30	25.8103	26.7814	5.17507	0.176427	0.411841	0.809586	0.941079	27.4263	28.4582	5.23701
CCAAT/CEBP	same	35.5	19	24.0427	24.9208	4.99208	0.178049	0.411841	-1.01015	0.941079	25.5481	26.4811	5.05451
CCAAT/CEBP	opp	35.5	35	33.1283	34.2275	5.85043	0.331416	0.47905	0.319931	1.11568	29.6934	30.6786	5.44916
CCAAT/CEBP	opp	36.5	32	31.225	32.292	5.6826	0.39883	0.47905	0.136381	1.11568	27.9874	28.9438	5.29032
CCAAT/CEBP	same	36.5	25	24.9467	25.7307	5.07254	0.442836	0.482662	0.0105169	0.941079	26.5086	27.3417	5.14865
CCAAT/CEBP	opp	37.5	28	31.7129	32.8049	5.72756	0.291042	0.454027	-0.648245	1.11568	28.4247	29.4035	5.33148
CCAAT/CEBP	same	37.5	26	27.4089	28.3654	5.32592	0.443376	0.482662	-0.264528	0.941079	29.1249	30.1414	5.39675
CCAAT/CEBP	opp	38.5	34	32.5	33.5988	5.79645	0.353328	0.47905	0.258774	1.11568	29.1303	30.1151	5.39725
CCAAT/CEBP	same	38.5	27	26.2369	27.2858	5.22359	0.390864	0.47905	0.146081	0.941079	27.8796	28.9942	5.28012
CCAAT/CEBP	same	39.5	27	24.1899	25.0915	5.00914	0.244539	0.446703	0.560993	0.941079	25.7044	26.6625	5.06995
CCAAT/CEBP	opp	39.5	32	32.8465	33.8493	5.81801	0.487502	0.520809	-0.145502	1.11568	29.4408	30.3396	5.42594
CCAAT/CEBP	opp	40.5	27	34.1371	35.1726	5.93065	0.125804	0.385698	-1.20342	1.11568	30.5976	31.5257	5.53151
CCAAT/CEBP	same	40.5	29	25.089	25.9928	5.09832	0.186988	0.419022	0.767116	0.941079	26.6598	27.6202	5.16332
CCAAT/CEBP	same	41.5	40	24.6411	25.5281	5.05254	0.00158153	0.0650357	3.03985	0.941079	26.1838	27.1264	5.11701
CCAAT/CEBP	opp	41.5	25	32.6007	33.8016	5.81392	0.103307	0.369869	-1.30733	1.11568	29.2205	30.2969	5.4056
CCAAT/CEBP	opp	42.5	42	32.3159	33.4369	5.78247	0.0412828	0.234081	1.67474	1.11568	28.9652	29.97	5.38193
CCAAT/CEBP	same	42.5	25	26.8945	27.8799	5.28014	0.405669	0.47905	-0.358798	0.941079	28.5784	29.6255	5.34587
CCAAT/CEBP	opp	43.5	20	33.6217	34.7552	5.89536	0.00797963	0.1525	-2.31058	1.11568	30.1356	31.1516	5.48959
CCAAT/CEBP	same	43.5	33	25.187	26.0428	5.10322	0.053957	0.247424	1.53099	0.941079	26.764	27.6734	5.17339
CPEB1	same	-41.5	3	4.46166	4.61315	2.14782	0.348806	0.495172	-0.68053	0.943074	4.73098	4.89161	2.17508
CPEB1	opp	-41.5	3	3.90607	4.02118	2.00529	0.452034	0.559351	-0.451838	0.912607	4.28012	4.40626	2.06884
CPEB1	same	-40.5	6	3.80146	3.95424	1.98853	0.091029	0.476308	1.10561	0.943074	4.03092	4.19293	2.00772
CPEB1	opp	-40.5	5	3.65518	3.78755	1.94616	0.163559	0.476308	0.691012	0.912607	4.0052	4.15025	2.0013
CPEB1	opp	-39.5	2	3.8049	3.88883	1.97201	0.268105	0.476308	-0.915261	0.912607	4.16927	4.26123	2.04188
CPEB1	same	-39.5	4	3.77234	3.88336	1.97063	0.326785	0.495172	0.115526	0.943074	4.00005	4.11777	2.00001
CPEB1	opp	-38.5	5	3.9618	4.06163	2.01535	0.208927	0.476308	0.515149	0.912607	4.34118	4.45058	2.08355
CPEB1	same	-38.5	4	3.48319	3.5481	1.88364	0.271385	0.476308	0.274369	0.943074	3.69344	3.76227	1.92183
CPEB1	same	-37.5	2	3.88474	3.99224	1.99806	0.255483	0.476308	-0.943286	0.943074	4.11923	4.23322	2.02959
CPEB1	opp	-37.5	4	4.09883	4.22532	2.05556	0.609536	0.639269	-0.048081	0.912607	4.49135	4.62994	2.11928
CPEB1	opp	-36.5	3	4.16474	4.31922	2.07827	0.401964	0.515954	-0.560438	0.912607	4.56357	4.73284	2.13625
CPEB1	same	-36.5	4	4.2673	4.37912	2.09264	0.576766	0.627872	-0.127733	0.943074	4.52488	4.64345	2.12718
CPEB1	opp	-35.5	5	4.28936	4.43636	2.10627	0.261571	0.476308	0.337391	0.912607	4.70012	4.8612	2.16798
CPEB1	same	-35.5	3	3.67657	3.79652	1.94847	0.499054	0.598469	-0.347233	0.943074	3.8985	4.02569	1.97446
CPEB1	opp	-34.5	7	4.62582	4.7459	2.17851	0.0973102	0.476308	1.08982	0.912607	5.0688	5.20037	2.2514
CPEB1	same	-34.5	3	3.82199	3.95363	1.98837	0.468996	0.576195	-0.4134	0.943074	4.0527	4.19228	2.01313
CPEB1	opp	-33.5	6	4.07715	4.24432	2.06018	0.118867	0.476308	0.933342	0.912607	4.46759	4.65077	2.11367
CPEB1	same	-33.5	3	3.55005	3.67332	1.91659	0.525873	0.607598	-0.286992	0.943074	3.76433	3.89505	1.94019
CPEB1	opp	-32.5	5	4.19697	4.32187	2.07891	0.246363	0.476308	0.386272	0.912607	4.59889	4.73574	2.1445
CPEB1	same	-32.5	4	3.92147	4.03762	2.00938	0.355825	0.495172	0.0390815	0.943074	4.15818	4.28134	2.03916
CPEB1	opp	-31.5	6	3.982	4.11757	2.02918	0.108807	0.476308	0.994489	0.912607	4.36333	4.51188	2.08886
CPEB1	same	-31.5	2	3.93951	4.05518	2.01375	0.247101	0.476308	-0.963136	0.943074	4.17731	4.29996	2.04385
CPEB1	opp	-30.5	6	4.568	4.76711	2.18337	0.17776	0.476308	0.655865	0.912607	5.00544	5.22362	2.23729
CPEB1	same	-30.5	3	4.5864	4.74597	2.17852	0.327929	0.495172	-0.728199	0.943074	4.86324	5.03244	2.20528
CPEB1	opp	-29.5	3	4.67942	4.80467	2.19195	0.312935	0.495172	-0.766175	0.912607	5.12753	5.26477	2.26441
CPEB1	same	-29.5	3	4.41875	4.53436	2.1294	0.356189	0.495172	-0.666267	0.943074	4.68548	4.80807	2.1646
CPEB1	opp	-28.5	9	4.71075	4.8796	2.20898	0.0225089	0.476308	1.94173	0.912607	5.16186	5.34688	2.27197
CPEB1	same	-28.5	1	3.99655	4.10124	2.02515	0.0918315	0.476308	-1.47967	0.943074	4.23779	4.3488	2.05859
CPEB1	opp	-27.5	5	4.46805	4.62254	2.15001	0.291622	0.495172	0.247416	0.912607	4.89592	5.0652	2.21267
CPEB1	same	-27.5	3	4.23519	4.3561	2.08713	0.38892	0.514571	-0.591814	0.943074	4.49084	4.61904	2.11916
CPEB1	opp	-26.5	2	4.38873	4.60943	2.14696	0.186486	0.476308	-1.11261	0.912607	4.809	5.05083	2.19294
CPEB1	same	-26.5	5	3.88035	3.9828	1.99569	0.196459	0.476308	0.561035	0.943074	4.11457	4.22321	2.02844
CPEB1	opp	-25.5	9	4.50975	4.71136	2.17057	0.0173196	0.476308	2.0687	0.912607	4.94161	5.16252	2.22297
CPEB1	same	-25.5	4	3.66281	3.77572	1.94312	0.305612	0.495172	0.17353	0.943074	3.88391	4.00363	1.97076
CPEB1	same	-24.5	7	4.25639	4.42501	2.10357	0.0678839	0.476308	1.30426	0.943074	4.51331	4.69212	2.12446
CPEB1	opp	-24.5	6	4.757	4.96943	2.22922	0.203217	0.476308	0.557594	0.912607	5.21254	5.44532	2.2831
CPEB1	opp	-23.5	1	3.82451	3.94898	1.9872	0.105315	0.476308	-1.42135	0.912607	4.19075	4.32714	2.04713
CPEB1	same	-23.5	1	3.65358	3.78784	1.94624	0.12052	0.476308	-1.36344	0.943074	3.87411	4.01648	1.96828
CPEB1	opp	-22.5	6	4.1265	4.24194	2.0596	0.124267	0.476308	0.909645	0.912607	4.52166	4.64815	2.12642
CPEB1	same	-22.5	3	3.51493	3.60612	1.89898	0.533414	0.607598	-0.271162	0.943074	3.7271	3.82379	1.93057
CPEB1	same	-21.5	5	3.77037	3.88279	1.97048	0.180088	0.476308	0.624026	0.943074	3.99796	4.11716	1.99949
CPEB1	opp	-21.5	3	4.06345	4.19678	2.0486	0.421173	0.53266	-0.51911	0.912607	4.45258	4.59867	2.11011
CPEB1	same	-20.5	6	3.32375	3.42567	1.85086	0.0525521	0.476308	1.44595	0.943074	3.52438	3.63245	1.87733
CPEB1	opp	-20.5	6	3.57286	3.68707	1.92018	0.0710519	0.476308	1.26402	0.912607	3.91501	4.04015	1.97864
CPEB1	same	-19.5	6	3.82632	3.92808	1.98194	0.093373	0.476308	1.09675	0.943074	4.05728	4.16519	2.01427
CPEB1	opp	-19.5	5	4.14868	4.28636	2.07035	0.238518	0.476308	0.411194	0.912607	4.54597	4.69683	2.13213
CPEB1	opp	-18.5	1	3.54331	3.67784	1.91777	0.131381	0.476308	-1.32618	0.912607	3.88262	4.03004	1.97044
CPEB1	same	-18.5	5	4.12003	4.27482	2.06756	0.233899	0.476308	0.425609	0.943074	4.36872	4.53285	2.09015
CPEB1	opp	-17.5	5	4.06876	4.18451	2.04561	0.225706	0.476308	0.45524	0.912607	4.45839	4.58523	2.11149
CPEB1	same	-17.5	2	3.97896	4.09056	2.02251	0.241202	0.476308	-0.978466	0.943074	4.21914	4.33748	2.05405
CPEB1	opp	-16.5	8	4.65463	4.79838	2.19052	0.0478575	0.476308	1.5272	0.912607	5.10036	5.25789	2.2584
CPEB1	same	-16.5	4	4.05063	4.17809	2.04404	0.618947	0.645205	-0.0247694	0.943074	4.29513	4.43028	2.07247
CPEB1	opp	-15.5	0	4.44186	4.56003	2.13542	0.011774	0.471825	-2.08009	0.912607	4.86722	4.9967	2.20618
CPEB1	same	-15.5	5	3.78655	3.90665	1.97653	0.182461	0.476308	0.613932	0.943074	4.01511	4.14247	2.00377
CPEB1	opp	-14.5	5	4.39924	4.50739	2.12306	0.27996	0.486396	0.282969	0.912607	4.82052	4.93902	2.19557
CPEB1	same	-14.5	4	3.77868	3.90663	1.97652	0.328015	0.495172	0.111974	0.943074	4.00677	4.14244	2.00169
CPEB1	same	-13.5	3	4.44249	4.58574	2.14143	0.352092	0.495172	-0.67361	0.943074	4.71065	4.86255	2.1704
CPEB1	opp	-13.5	3	4.17124	4.32916	2.08066	0.400751	0.515954	-0.562915	0.912607	4.57068	4.74372	2.13792
CPEB1	opp	-12.5	5	3.78392	3.89412	1.97335	0.182075	0.476308	0.616248	0.912607	4.14628	4.26703	2.03624
CPEB1	same	-12.5	4	4.57507	4.73089	2.17506	0.517916	0.605997	-0.264393	0.943074	4.85123	5.01645	2.20255
CPEB1	opp	-11.5	5	3.97475	4.07507	2.01868	0.210936	0.476308	0.50788	0.912607	4.35538	4.46531	2.08696
CPEB1	same	-11.5	3	4.19328	4.28505	2.07004	0.39665	0.515954	-0.576452	0.943074	4.44639	4.5437	2.10865
CPEB1	opp	-10.5	4	3.94113	4.07808	2.01942	0.359663	0.495172	0.0291522	0.912607	4.31854	4.4686	2.07811
CPEB1	same	-10.5	3	4.03395	4.21133	2.05215	0.426865	0.535919	-0.503838	0.943074	4.27745	4.46554	2.0682
CPEB1	same	-9.5	5	3.95142	4.0955	2.02373	0.207324	0.476308	0.518141	0.943074	4.18994	4.34271	2.04693
CPEB1	opp	-9.5	4	4.28515	4.44275	2.10778	0.57331	0.627872	-0.135285	0.912607	4.6955	4.8682	2.16691
CPEB1	same	-8.5	6	4.19493	4.32394	2.07941	0.131957	0.476308	0.868069	0.943074	4.44815	4.58494	2.10906
CPEB1	opp	-8.5	4	4.00364	4.11423	2.02836	0.628126	0.650829	-0.00179481	0.912607	4.38704	4.50822	2.09453
CPEB1	same	-7.5	2	4.18219	4.31617	2.07754	0.212604	0.476308	-1.05037	0.943074	4.43464	4.57671	2.10586
CPEB1	opp	-7.5	4	3.94215	4.07561	2.01882	0.359864	0.495172	0.028653	0.912607	4.31966	4.4659	2.07838
CPEB1	opp	-6.5	5	4.3295	4.45426	2.11051	0.268252	0.476308	0.317697	0.912607	4.7441	4.88081	2.17809
CPEB1	same	-6.5	4	3.63005	3.73337	1.93219	0.299317	0.495172	0.191468	0.943074	3.84916	3.95872	1.96193
CPEB1	opp	-5.5	1	4.38809	4.53396	2.12931	0.066944	0.476308	-1.59117	0.912607	4.8083	4.96814	2.19278
CPEB1	same	-5.5	3	2.43716	2.49565	1.57976	0.229078	0.476308	0.356284	0.943074	2.58427	2.6463	1.60757
CPEB1	same	-4.5	11	3.36414	3.44386	1.85576	0.000203123	0.0349371	4.11467	0.943074	3.56721	3.65174	1.8887
CPEB1	opp	-4.5	3	3.65054	3.75035	1.93658	0.504523	0.598469	-0.335924	0.912607	4.00013	4.10949	2.00003
CPEB1	same	-3.5	3	5.52521	5.66357	2.37983	0.198859	0.476308	-1.06109	0.943074	5.85872	6.00543	2.42048
CPEB1	opp	-3.5	4	3.45082	3.55033	1.88423	0.265303	0.476308	0.291461	0.912607	3.78128	3.89032	1.94455
CPEB1	opp	-2.5	3	6.75802	6.96876	2.63984	0.0952849	0.476308	-1.42358	0.912607	7.40518	7.6361	2.72125
CPEB1	same	-2.5	1	2.67415	2.74091	1.65557	0.25339	0.476308	-1.01122	0.943074	2.83556	2.90636	1.68391
CPEB1	opp	-1.5	14	16.4469	17.9272	4.23405	0.327169	0.495172	-0.577911	0.912607	18.0219	19.644	4.24522
CPEB1	same	-1.5	0	0	0	0	1	1	0	0.943074	0	0	0
CPEB1	opp	-0.5	0	0	0	0	1	1	0	0.912607	0	0	0
CPEB1	same	-0.5	0	0	0	0	1	1	0	0.943074	0	0	0
CPEB1	same	0.5	3	1.24521	1.2443	1.11548	0.037824	0.476308	1.57312	0.959994	1.30864	1.30768	1.14396
CPEB1	opp	0.5	0	0	0	0	1	1	0	1.11857	0	0	0
CPEB1	opp	1.5	32	44.6504	48.6589	6.97559	0.0296779	0.476308	-1.81352	1.11857	39.9173	43.5009	6.31801
CPEB1	same	1.5	0	0	0	0	1	1	0	0.959994	0	0	0
CPEB1	opp	2.5	19	23.4403	23.7724	4.8757	0.211061	0.476308	-0.910708	1.11857	20.9556	21.2525	4.57773
CPEB1	same	2.5	0	0	0	0	1	1	0	0.959994	0	0	0
CPEB1	same	3.5	1	0.468194	0.475915	0.689866	0.0807166	0.476308	0.770884	0.959994	0.487705	0.495748	0.698359
CPEB1	opp	3.5	16	16.8994	17.0464	4.12873	0.477449	0.58242	-0.217848	1.11857	15.108	15.2394	3.88691
CPEB1	same	4.5	2	0.687771	0.689403	0.830303	0.0326706	0.476308	1.58042	0.959994	0.716432	0.718133	0.846423
CPEB1	opp	4.5	16	13.1834	13.7803	3.71219	0.177964	0.476308	0.758755	1.11857	11.7859	12.3196	3.43306
CPEB1	opp	5.5	3	4.98102	5.10652	2.25976	0.267701	0.476308	-0.876648	1.11857	4.45301	4.56521	2.11022
CPEB1	same	5.5	3	3.44138	3.49749	1.87016	0.549334	0.617552	-0.23601	0.959994	3.58479	3.64324	1.89335
CPEB1	same	6.5	6	3.63115	3.69011	1.92097	0.075873	0.476308	1.23316	0.959994	3.78247	3.84389	1.94486
CPEB1	opp	6.5	4	3.69683	3.93256	1.98307	0.312169	0.495172	0.152878	1.11857	3.30496	3.51569	1.81795
CPEB1	same	7.5	4	3.82995	3.96416	1.99102	0.337981	0.495172	0.0854096	0.959994	3.98955	4.12936	1.99739
CPEB1	opp	7.5	5	5.31458	5.46885	2.33856	0.560938	0.626502	-0.134519	1.11857	4.75122	4.88913	2.17973
CPEB1	opp	8.5	7	5.61434	5.82483	2.41347	0.204844	0.476308	0.574138	1.11857	5.0192	5.20738	2.24036
CPEB1	same	8.5	3	4.56986	4.78715	2.18796	0.330647	0.495172	-0.717501	0.959994	4.7603	4.98665	2.18181
CPEB1	same	9.5	3	4.30593	4.47159	2.11461	0.376089	0.505369	-0.617573	0.959994	4.48537	4.65794	2.11787
CPEB1	opp	9.5	5	5.50138	5.66271	2.37965	0.528683	0.607598	-0.210694	1.11857	4.91821	5.06244	2.2177
CPEB1	same	10.5	7	3.92976	4.06856	2.01707	0.0470614	0.476308	1.52213	0.959994	4.09353	4.23811	2.02325
CPEB1	opp	10.5	6	6.12926	6.34472	2.51887	0.585551	0.631014	-0.0513157	1.11857	5.47954	5.67216	2.34084
CPEB1	same	11.5	0	4.2892	4.42967	2.10468	0.0137158	0.471825	-2.03794	0.959994	4.46795	4.61427	2.11375
CPEB1	opp	11.5	3	5.41646	5.60124	2.36669	0.211347	0.476308	-1.02103	1.11857	4.8423	5.00749	2.20052
CPEB1	opp	12.5	7	4.89445	5.05849	2.24911	0.122583	0.476308	0.936169	1.11857	4.37563	4.52227	2.0918
CPEB1	same	12.5	4	4.61502	4.83946	2.19988	0.510419	0.601316	-0.279572	0.959994	4.80735	5.04114	2.19257
CPEB1	opp	13.5	5	4.13116	4.32447	2.07953	0.235691	0.476308	0.417803	1.11857	3.69325	3.86606	1.92178
CPEB1	same	13.5	4	4.30771	4.4741	2.11521	0.568948	0.627301	-0.145476	0.959994	4.48723	4.66055	2.11831
CPEB1	same	14.5	10	3.90608	4.03535	2.00882	0.00237654	0.204383	3.03358	0.959994	4.06886	4.20352	2.01714
CPEB1	opp	14.5	4	4.31119	4.42361	2.10324	0.568277	0.627301	-0.147956	1.11857	3.85419	3.95469	1.96321
CPEB1	same	15.5	4	4.44286	4.63117	2.15201	0.542983	0.614429	-0.205787	0.959994	4.628	4.82416	2.15128
CPEB1	opp	15.5	5	5.16525	5.3293	2.30853	0.58699	0.631014	-0.0715845	1.11857	4.61772	4.76438	2.14889
CPEB1	same	16.5	7	4.37597	4.54778	2.13255	0.0767236	0.476308	1.23046	0.959994	4.55833	4.7373	2.13502
CPEB1	opp	16.5	4	5.5886	5.73622	2.39504	0.34388	0.495172	-0.663288	1.11857	4.99619	5.12816	2.23522
CPEB1	same	17.5	2	4.31268	4.46767	2.11369	0.19577	0.476308	-1.09414	0.959994	4.4924	4.65385	2.11953
CPEB1	opp	17.5	7	5.78721	5.96009	2.44133	0.227281	0.476308	0.496773	1.11857	5.17375	5.3283	2.27459
CPEB1	same	18.5	7	4.00462	4.15118	2.03744	0.051409	0.476308	1.47017	0.959994	4.1715	4.32417	2.04243
CPEB1	opp	18.5	3	5.37316	5.54719	2.35525	0.216492	0.476308	-1.0076	1.11857	4.80358	4.95917	2.19171
CPEB1	same	19.5	6	4.05298	4.22661	2.05587	0.116267	0.476308	0.947053	0.959994	4.22188	4.40275	2.05472
CPEB1	opp	19.5	3	5.10708	5.24734	2.29071	0.250315	0.476308	-0.91984	1.11857	4.56572	4.6911	2.13675
CPEB1	opp	20.5	7	4.41729	4.55609	2.1345	0.0799309	0.476308	1.20998	1.11857	3.94904	4.07313	1.98722
CPEB1	same	20.5	2	4.07264	4.19365	2.04784	0.227651	0.476308	-1.01211	0.959994	4.24236	4.36842	2.0597
CPEB1	same	21.5	2	4.74647	4.89545	2.21257	0.147694	0.476308	-1.24131	0.959994	4.94427	5.09946	2.22357
CPEB1	opp	21.5	6	4.73151	4.90436	2.21458	0.199704	0.476308	0.57279	1.11857	4.22995	4.38448	2.05669
CPEB1	same	22.5	4	4.50602	4.66155	2.15906	0.530962	0.607598	-0.234369	0.959994	4.6938	4.85582	2.16652
CPEB1	opp	22.5	5	5.04276	5.26038	2.29355	0.608459	0.639269	-0.018642	1.11857	4.50821	4.70276	2.12325
CPEB1	opp	23.5	7	5.40323	5.5637	2.35875	0.178729	0.476308	0.676957	1.11857	4.83047	4.97393	2.19783
CPEB1	same	23.5	2	4.13205	4.28628	2.07033	0.219386	0.476308	-1.02981	0.959994	4.30425	4.46491	2.07467
CPEB1	same	24.5	4	3.99214	4.14172	2.03512	0.369628	0.504571	0.00386214	0.959994	4.15851	4.31431	2.03924
CPEB1	opp	24.5	4	4.65973	4.8289	2.19748	0.502079	0.598469	-0.30022	1.11857	4.16578	4.31702	2.04102
CPEB1	same	25.5	4	3.89861	4.01104	2.00276	0.351364	0.495172	0.0506236	0.959994	4.06108	4.17819	2.01521
CPEB1	opp	25.5	4	4.72687	4.92981	2.22032	0.489649	0.593096	-0.327374	1.11857	4.22581	4.40723	2.05568
CPEB1	same	26.5	2	4.17524	4.30961	2.07596	0.213534	0.476308	-1.04782	0.959994	4.34923	4.48921	2.08548
CPEB1	opp	26.5	5	4.80011	4.94547	2.22384	0.349013	0.495172	0.089885	1.11857	4.29128	4.42124	2.07154
CPEB1	same	27.5	2	4.08503	4.21479	2.05299	0.225908	0.476308	-1.0156	0.959994	4.25526	4.39043	2.06283
CPEB1	opp	27.5	4	5.2478	5.45919	2.33649	0.398139	0.515954	-0.53405	1.11857	4.69152	4.8805	2.16599
CPEB1	opp	28.5	7	5.80754	6.05607	2.46091	0.229975	0.476308	0.484562	1.11857	5.19192	5.41411	2.27858
CPEB1	same	28.5	3	4.07925	4.25243	2.06214	0.418143	0.53266	-0.523363	0.959994	4.24924	4.42964	2.06137
CPEB1	same	29.5	9	3.83325	3.95009	1.98748	0.0061457	0.352354	2.59965	0.959994	3.99299	4.1147	1.99825
CPEB1	opp	29.5	4	5.35728	5.5425	2.35425	0.380184	0.506913	-0.576523	1.11857	4.78939	4.95497	2.18847
CPEB1	same	30.5	7	4.02087	4.15005	2.03717	0.052386	0.476308	1.46239	0.959994	4.18843	4.323	2.04657
CPEB1	opp	30.5	2	4.93119	5.08594	2.2552	0.130568	0.476308	-1.29975	1.11857	4.40847	4.54681	2.09963
CPEB1	same	31.5	5	4.01532	4.16581	2.04103	0.217268	0.476308	0.482443	0.959994	4.18265	4.33942	2.04515
CPEB1	opp	31.5	3	4.32466	4.45184	2.10994	0.372736	0.504808	-0.62782	1.11857	3.86623	3.97993	1.96627
CPEB1	same	32.5	5	4.42499	4.56517	2.13663	0.284313	0.489018	0.269118	0.959994	4.6094	4.75542	2.14695
CPEB1	opp	32.5	3	4.60215	4.77647	2.18551	0.325356	0.495172	-0.733076	1.11857	4.1143	4.27015	2.02837
CPEB1	same	33.5	5	4.79273	4.9238	2.21896	0.347722	0.495172	0.0934107	0.959994	4.99245	5.12899	2.23438
CPEB1	opp	33.5	5	5.07346	5.25415	2.29219	0.603072	0.639269	-0.0320496	1.11857	4.53566	4.69719	2.12971
CPEB1	opp	34.5	8	4.78896	4.98015	2.23163	0.0551841	0.476308	1.43888	1.11857	4.28131	4.45224	2.06913
CPEB1	same	34.5	2	4.22672	4.36329	2.08885	0.206729	0.476308	-1.066	0.959994	4.40286	4.54512	2.0983
CPEB1	opp	35.5	3	5.55228	5.70847	2.38924	0.195845	0.476308	-1.06824	1.11857	4.96372	5.10335	2.22794
CPEB1	same	35.5	3	4.42281	4.55836	2.13503	0.355487	0.495172	-0.666411	0.959994	4.60712	4.74832	2.14642
CPEB1	opp	36.5	6	5.16091	5.28346	2.29858	0.261703	0.476308	0.365048	1.11857	4.61384	4.72339	2.14798
CPEB1	same	36.5	2	3.6028	3.70331	1.9244	0.302252	0.495172	-0.832883	0.959994	3.75294	3.85764	1.93725
CPEB1	same	37.5	2	4.14424	4.32313	2.07921	0.217721	0.476308	-1.03128	0.959994	4.31695	4.50329	2.07773
CPEB1	opp	37.5	4	4.95134	5.10494	2.25941	0.449073	0.559351	-0.421055	1.11857	4.42648	4.5638	2.10392
CPEB1	opp	38.5	1	4.74381	4.93318	2.22108	0.0500023	0.476308	-1.68558	1.11857	4.24095	4.41025	2.05936
CPEB1	same	38.5	6	4.692	4.8991	2.21339	0.194306	0.476308	0.59095	0.959994	4.88753	5.10327	2.21078
CPEB1	same	39.5	2	4.2319	4.35417	2.08667	0.206054	0.476308	-1.0696	0.959994	4.40826	4.53563	2.09958
CPEB1	opp	39.5	6	4.93443	5.10285	2.25895	0.228293	0.476308	0.47171	1.11857	4.41136	4.56193	2.10032
CPEB1	opp	40.5	9	5.69014	5.85356	2.41941	0.0642417	0.476308	1.36804	1.11857	5.08697	5.23306	2.25543
CPEB1	same	40.5	4	4.10493	4.24677	2.06077	0.608347	0.639269	-0.0509159	0.959994	4.27599	4.42375	2.06785
CPEB1	opp	41.5	2	5.41953	5.60845	2.36822	0.0934797	0.476308	-1.44393	1.11857	4.84504	5.01393	2.20115
CPEB1	same	41.5	5	4.14764	4.33441	2.08193	0.23835	0.476308	0.409408	0.959994	4.32049	4.51504	2.07858
CPEB1	same	42.5	2	3.79638	3.91528	1.97871	0.269481	0.476308	-0.907858	0.959994	3.95459	4.07844	1.98862
CPEB1	opp	42.5	5	4.84133	5.00206	2.23653	0.356221	0.495172	0.0709469	1.11857	4.32813	4.47183	2.08042
CPEB1	opp	43.5	1	5.09883	5.25845	2.29313	0.0372266	0.476308	-1.78744	1.11857	4.55834	4.70103	2.13503
CPEB1	same	43.5	6	4.18743	4.30241	2.07422	0.131103	0.476308	0.873854	0.959994	4.36193	4.4817	2.08852
CREB/ATF/1	opp	-41.5	40	44.0278	45.5529	6.74929	0.303807	0.462432	-0.59678	0.976038	45.1087	46.6713	6.7163
CREB/ATF/1	same	-41.5	44	45.2972	46.7768	6.83936	0.462596	0.503928	-0.189667	0.992002	45.6624	47.154	6.7574
CREB/ATF/1	same	-40.5	40	45.0758	46.6959	6.83344	0.251987	0.456229	-0.742783	0.992002	45.4392	47.0724	6.74086
CREB/ATF/1	opp	-40.5	42	45.3707	47.1469	6.86636	0.342471	0.468403	-0.490906	0.976038	46.4846	48.3044	6.81796
CREB/ATF/1	opp	-39.5	50	43.8017	45.2296	6.72529	0.155663	0.394016	0.921635	0.976038	44.8771	46.34	6.69903
CREB/ATF/1	same	-39.5	42	45.6292	47.1883	6.86937	0.328643	0.468403	-0.528314	0.992002	45.9971	47.5687	6.78211
CREB/ATF/1	same	-38.5	39	44.1923	45.8147	6.76865	0.244055	0.455102	-0.767112	0.992002	44.5486	46.184	6.67447
CREB/ATF/1	opp	-38.5	46	45.2679	46.8333	6.84349	0.417997	0.48578	0.10697	0.976038	46.3793	47.9831	6.81023
CREB/ATF/1	same	-37.5	35	43.6249	45.1989	6.72301	0.106484	0.359124	-1.28289	0.992002	43.9766	45.5633	6.63148
CREB/ATF/1	opp	-37.5	44	44.3084	45.747	6.76365	0.52147	0.538054	-0.0456026	0.976038	45.3962	46.8701	6.73767
CREB/ATF/1	same	-36.5	41	44.5606	46.3002	6.80442	0.330489	0.468403	-0.52328	0.992002	44.9199	46.6735	6.70223
CREB/ATF/1	opp	-36.5	42	42.1993	43.528	6.59758	0.528669	0.538054	-0.0302146	0.976038	43.2353	44.5966	6.57536
CREB/ATF/1	same	-35.5	57	44.6176	46.2634	6.80172	0.0307845	0.300073	1.82048	0.992002	44.9773	46.6364	6.70651
CREB/ATF/1	opp	-35.5	43	42.2025	43.5178	6.5968	0.411259	0.484497	0.120887	0.976038	43.2386	44.5862	6.57561
CREB/ATF/1	opp	-34.5	46	42.8232	44.2973	6.65562	0.281203	0.457444	0.477304	0.976038	43.8746	45.3848	6.62379
CREB/ATF/1	same	-34.5	44	43.4495	44.9728	6.70618	0.427011	0.489639	0.0820941	0.992002	43.7998	45.3354	6.61814
CREB/ATF/1	opp	-33.5	28	42.0994	43.479	6.59386	0.0139036	0.265713	-2.13826	0.976038	43.1329	44.5464	6.56757
CREB/ATF/1	same	-33.5	50	44.5669	46.1035	6.78996	0.185515	0.403923	0.800173	0.992002	44.9262	46.4752	6.7027
CREB/ATF/1	opp	-32.5	32	43.8792	45.2879	6.72963	0.0379488	0.300073	-1.76521	0.976038	44.9564	46.3997	6.70496
CREB/ATF/1	same	-32.5	48	44.5103	46.0148	6.78342	0.269583	0.457444	0.514443	0.992002	44.8692	46.3857	6.69844
CREB/ATF/1	same	-31.5	57	45.8444	47.2862	6.8765	0.0465758	0.300073	1.62228	0.992002	46.214	47.6674	6.79809
CREB/ATF/1	opp	-31.5	36	43.8111	45.2058	6.72353	0.133152	0.388172	-1.16175	0.976038	44.8866	46.3156	6.69975
CREB/ATF/1	same	-30.5	37	46.7555	48.3183	6.95114	0.0842489	0.336995	-1.40344	0.992002	47.1325	48.7079	6.86531
CREB/ATF/1	opp	-30.5	48	44.8213	46.3071	6.80493	0.285415	0.457444	0.467112	0.976038	45.9217	47.444	6.77656
CREB/ATF/1	opp	-29.5	51	43.5313	45.1107	6.71645	0.115441	0.361015	1.11201	0.976038	44.6	46.2182	6.67832
CREB/ATF/1	same	-29.5	51	46.0811	47.6942	6.9061	0.209693	0.42432	0.712248	0.992002	46.4527	48.0787	6.81562
CREB/ATF/1	same	-28.5	52	46.6736	48.3718	6.95498	0.194916	0.403923	0.765839	0.992002	47.0499	48.7618	6.85929
CREB/ATF/1	opp	-28.5	46	42.7084	44.2257	6.65024	0.275221	0.457444	0.494953	0.976038	43.7569	45.3114	6.6149
CREB/ATF/1	same	-27.5	35	47.6217	49.4055	7.02891	0.0347685	0.300073	-1.79569	0.992002	48.0057	49.8038	6.92861
CREB/ATF/1	opp	-27.5	51	41.9988	43.4886	6.59459	0.0748861	0.32201	1.36494	0.976038	43.0299	44.5562	6.55972
CREB/ATF/1	opp	-26.5	38	40.4377	41.9528	6.4771	0.389474	0.484425	-0.376354	0.976038	41.4304	42.9828	6.43665
CREB/ATF/1	same	-26.5	45	45.3538	47.0151	6.85675	0.518542	0.538054	-0.0516003	0.992002	45.7195	47.3941	6.76162
CREB/ATF/1	same	-25.5	35	46.543	48.2987	6.94973	0.0480174	0.300073	-1.66092	0.992002	46.9182	48.6881	6.84969
CREB/ATF/1	opp	-25.5	43	41.826	43.2522	6.57664	0.388658	0.484425	0.178516	0.976038	42.8528	44.3141	6.5462
CREB/ATF/1	same	-24.5	33	45.993	47.6403	6.9022	0.0280187	0.300073	-1.88244	0.992002	46.3638	48.0244	6.80909
CREB/ATF/1	opp	-24.5	40	42.1758	43.7374	6.61343	0.407544	0.484497	-0.328997	0.976038	43.2112	44.8112	6.57352
CREB/ATF/1	opp	-23.5	57	44.1057	45.8187	6.76895	0.0255953	0.300073	1.90492	0.976038	45.1885	46.9436	6.72224
CREB/ATF/1	same	-23.5	46	44.9535	46.4132	6.81273	0.399695	0.484497	0.153611	0.992002	45.3159	46.7874	6.73171
CREB/ATF/1	same	-22.5	29	43.0004	44.6271	6.68035	0.0155186	0.266919	-2.09575	0.992002	43.3471	44.9869	6.58385
CREB/ATF/1	opp	-22.5	36	46.1763	47.9179	6.92228	0.0731029	0.32201	-1.47008	0.976038	47.3099	49.0943	6.87822
CREB/ATF/1	same	-21.5	37	44.0025	45.5096	6.74608	0.163505	0.394016	-1.03801	0.992002	44.3573	45.8765	6.66012
CREB/ATF/1	opp	-21.5	44	45.0662	46.8155	6.84218	0.476246	0.508785	-0.15583	0.976038	46.1726	47.9648	6.79504
CREB/ATF/1	opp	-20.5	41	45.2362	46.8416	6.84409	0.295211	0.457444	-0.618963	0.976038	46.3468	47.9915	6.80785
CREB/ATF/1	same	-20.5	43	46.0411	47.6162	6.90045	0.361984	0.475381	-0.440709	0.992002	46.4123	48.0001	6.81266
CREB/ATF/1	same	-19.5	56	44.1784	45.7986	6.76747	0.0358989	0.300073	1.74682	0.992002	44.5346	46.1678	6.67343
CREB/ATF/1	opp	-19.5	52	47.8887	49.8137	7.05788	0.248304	0.455102	0.582512	0.976038	49.0644	51.0366	7.0046
CREB/ATF/1	same	-18.5	39	40.9376	42.5561	6.52351	0.42084	0.485802	-0.297025	0.992002	41.2677	42.8992	6.42399
CREB/ATF/1	opp	-18.5	48	47.6085	49.4527	7.03226	0.439223	0.500307	0.055667	0.976038	48.7773	50.6667	6.98408
CREB/ATF/1	same	-17.5	52	42.5894	44.3844	6.66216	0.0681805	0.32201	1.41254	0.992002	42.9328	44.7422	6.55231
CREB/ATF/1	opp	-17.5	49	43.1346	44.617	6.6796	0.165634	0.394016	0.878103	0.976038	44.1936	45.7124	6.64783
CREB/ATF/1	opp	-16.5	32	43.0604	44.5495	6.67454	0.048837	0.300073	-1.6571	0.976038	44.1175	45.6432	6.6421
CREB/ATF/1	same	-16.5	36	42.154	44.0868	6.63979	0.193489	0.403923	-0.926835	0.992002	42.4938	44.4423	6.51873
CREB/ATF/1	same	-15.5	33	40.8007	42.5841	6.52565	0.124488	0.375648	-1.1954	0.992002	41.1297	42.9274	6.41324
CREB/ATF/1	opp	-15.5	45	43.667	45.1368	6.71839	0.381865	0.484425	0.198406	0.976038	44.7391	46.2449	6.68873
CREB/ATF/1	opp	-14.5	35	43.3669	44.6622	6.68298	0.113615	0.361015	-1.25196	0.976038	44.4315	45.7587	6.6657
CREB/ATF/1	same	-14.5	38	38.5186	39.9065	6.31716	0.509551	0.534407	-0.0820921	0.992002	38.8291	40.2283	6.2313
CREB/ATF/1	same	-13.5	45	37.7091	39.0358	6.24787	0.104782	0.359124	1.16695	0.992002	38.0131	39.3505	6.16547
CREB/ATF/1	opp	-13.5	38	40.5525	41.9109	6.47386	0.382621	0.484425	-0.394273	0.976038	41.548	42.9398	6.44578
CREB/ATF/1	same	-12.5	56	42.8227	44.4093	6.66403	0.0219118	0.300073	1.97738	0.992002	43.1679	44.7673	6.57023
CREB/ATF/1	opp	-12.5	32	37.8907	39.2312	6.26348	0.192155	0.403923	-0.940478	0.976038	38.8209	40.1943	6.23064
CREB/ATF/1	opp	-11.5	48	38.8259	40.223	6.34216	0.0642814	0.32201	1.44653	0.976038	39.7791	41.2105	6.30706
CREB/ATF/1	same	-11.5	43	41.4047	42.7918	6.54155	0.363661	0.475381	0.243866	0.992002	41.7385	43.1368	6.46054
CREB/ATF/1	same	-10.5	45	39.8627	41.1157	6.41215	0.184364	0.403923	0.801188	0.992002	40.184	41.4471	6.33909
CREB/ATF/1	opp	-10.5	44	40.8417	42.1037	6.48874	0.277608	0.457444	0.486729	0.976038	41.8444	43.1374	6.46873
CREB/ATF/1	same	-9.5	32	41.0246	42.4247	6.51342	0.0878028	0.34036	-1.38553	0.992002	41.3553	42.7667	6.43081
CREB/ATF/1	opp	-9.5	48	41.5787	42.9309	6.55217	0.142144	0.394016	0.980033	0.976038	42.5994	43.9848	6.52682
CREB/ATF/1	same	-8.5	45	41.7551	43.1193	6.56653	0.275364	0.457444	0.494152	0.992002	42.0918	43.4669	6.48782
CREB/ATF/1	opp	-8.5	43	42.8787	44.2918	6.65521	0.452199	0.502423	0.0182207	0.976038	43.9314	45.3791	6.62808
CREB/ATF/1	opp	-7.5	45	41.7602	43.0838	6.56383	0.275628	0.457444	0.493591	0.976038	42.7854	44.1415	6.54105
CREB/ATF/1	same	-7.5	40	40.7432	42.1698	6.49383	0.49524	0.522585	-0.114452	0.992002	41.0717	42.5098	6.40872
CREB/ATF/1	opp	-6.5	54	49.455	51.4861	7.17538	0.232985	0.443554	0.633418	0.976038	50.6691	52.7501	7.11822
CREB/ATF/1	same	-6.5	37	40.2756	41.8442	6.46871	0.338749	0.468403	-0.506382	0.992002	40.6003	42.1816	6.37184
CREB/ATF/1	opp	-5.5	87	54.9759	57.3834	7.57518	2.49806e-05	0.00429666	4.2275	0.976038	56.3256	58.7921	7.50504
CREB/ATF/1	same	-5.5	35	37.3867	38.6029	6.21312	0.388346	0.484425	-0.384139	0.992002	37.6881	38.9141	6.13907
CREB/ATF/1	same	-4.5	16	28.7277	29.8445	5.46301	0.00719859	0.247632	-2.3298	0.992002	28.9593	30.0851	5.38139
CREB/ATF/1	opp	-4.5	62	50.8303	52.1338	7.22037	0.0545652	0.31284	1.54697	0.976038	52.0782	53.4137	7.21652
CREB/ATF/1	same	-3.5	6	11.1053	11.3503	3.36903	0.0743895	0.32201	-1.51536	0.992002	11.1948	11.4418	3.34587
CREB/ATF/1	opp	-3.5	75	85.2027	88.1268	9.38759	0.146018	0.394016	-1.08683	0.976038	87.2944	90.2903	9.34315
CREB/ATF/1	opp	-2.5	2	0.819168	0.823457	0.907446	0.0502182	0.300073	1.30127	0.976038	0.839279	0.843673	0.916122
CREB/ATF/1	same	-2.5	14	15.1069	15.1616	3.89379	0.454742	0.502423	-0.284278	0.992002	15.2287	15.2838	3.9024
CREB/ATF/1	same	-1.5	8	13.2456	13.5123	3.67591	0.0890478	0.34036	-1.42701	0.992002	13.3523	13.6212	3.65409
CREB/ATF/1	opp	-1.5	1	0.650027	0.661475	0.813311	0.138634	0.394016	0.430307	0.976038	0.665985	0.677714	0.816079
CREB/ATF/1	opp	-0.5	71	103.018	107.04	10.346	0.000536553	0.0461435	-3.09468	0.976038	105.547	109.668	10.2736
CREB/ATF/1	same	-0.5	0	0	0	0	1	1	0	0.992002	0	0	0
CREB/ATF/1	opp	0.5	12	13.6719	14.1939	3.76749	0.391483	0.484425	-0.443766	1.05562	13.4588	13.9727	3.66863
CREB/ATF/1	same	0.5	0	0.491206	0.487095	0.697922	0.611888	0.619087	-0.703812	0.952259	0.505288	0.501059	0.710836
CREB/ATF/1	opp	1.5	11	13.8502	14.0512	3.74849	0.272876	0.457444	-0.760369	1.05562	13.1204	13.3108	3.62221
CREB/ATF/1	same	1.5	5	6.90894	6.98599	2.6431	0.31249	0.468403	-0.722233	0.952259	7.25531	7.33622	2.69357
CREB/ATF/1	same	2.5	11	7.27415	7.57501	2.75227	0.0667176	0.32201	1.35374	0.952259	7.63883	7.95478	2.76384
CREB/ATF/1	opp	2.5	1	2.32161	2.38869	1.54554	0.325902	0.468403	-0.855111	1.05562	2.19928	2.26282	1.483
CREB/ATF/1	same	3.5	64	72.4732	75.0185	8.66132	0.174999	0.403923	-0.978276	0.952259	76.1066	78.7795	8.72391
CREB/ATF/1	opp	3.5	0	0.127036	0.129445	0.359785	0.880702	0.885852	-0.353088	1.05562	0.120342	0.122625	0.346904
CREB/ATF/1	same	4.5	11	6.52446	6.68532	2.5856	0.0346926	0.300073	1.73095	0.952259	6.85156	7.02048	2.61755
CREB/ATF/1	opp	4.5	34	46.1009	47.0714	6.86086	0.0389322	0.300073	-1.76376	1.05562	43.6718	44.5911	6.60846
CREB/ATF/1	same	5.5	11	9.29844	9.51849	3.08521	0.226868	0.438441	0.551523	0.952259	9.76461	9.9957	3.12484
CREB/ATF/1	opp	5.5	28	31.6889	32.2384	5.67789	0.292478	0.457444	-0.649701	1.05562	30.0192	30.5397	5.47897
CREB/ATF/1	opp	6.5	21	28.0609	28.9758	5.38292	0.103978	0.359124	-1.31172	1.05562	26.5823	27.449	5.1558
CREB/ATF/1	same	6.5	59	57.8181	59.9238	7.74105	0.404396	0.484497	0.152675	0.952259	60.7168	62.9281	7.7921
CREB/ATF/1	opp	7.5	32	42.4766	44.1022	6.64095	0.0581319	0.32201	-1.57757	1.05562	40.2384	41.7783	6.34337
CREB/ATF/1	same	7.5	42	40.4508	41.5621	6.44687	0.364827	0.475381	0.240296	0.952259	42.4788	43.6458	6.51758
CREB/ATF/1	same	8.5	65	44.7704	46.4131	6.81272	0.00175399	0.0880415	2.96939	0.952259	47.0149	48.74	6.85674
CREB/ATF/1	opp	8.5	38	45.4732	47.0306	6.85789	0.149895	0.394016	-1.08972	1.05562	43.0771	44.5524	6.56331
CREB/ATF/1	opp	9.5	42	47.9412	49.6885	7.04901	0.218623	0.432221	-0.842845	1.05562	45.4151	47.0703	6.73907
CREB/ATF/1	same	9.5	44	41.1483	42.7469	6.53811	0.294136	0.457444	0.436159	0.952259	43.2113	44.89	6.57353
CREB/ATF/1	same	10.5	42	36.6037	37.9037	6.1566	0.164297	0.394016	0.876499	0.952259	38.4389	39.804	6.19991
CREB/ATF/1	opp	10.5	45	46.423	48.0282	6.93023	0.455686	0.502423	-0.205328	1.05562	43.9768	45.4974	6.6315
CREB/ATF/1	same	11.5	36	38.0788	39.3578	6.27358	0.408905	0.484497	-0.331358	0.952259	39.9879	41.3309	6.3236
CREB/ATF/1	opp	11.5	45	46.1624	47.6995	6.90648	0.470873	0.508785	-0.168306	1.05562	43.73	45.1861	6.61287
CREB/ATF/1	opp	12.5	36	46.2591	47.9064	6.92144	0.0714874	0.32201	-1.48221	1.05562	43.8215	45.382	6.61978
CREB/ATF/1	same	12.5	41	37.4422	38.6111	6.21378	0.248718	0.455102	0.572571	0.952259	39.3193	40.5468	6.27051
CREB/ATF/1	same	13.5	45	37.5666	38.78	6.22736	0.100485	0.359124	1.19367	0.952259	39.4499	40.7243	6.28092
CREB/ATF/1	opp	13.5	45	45.1908	46.6983	6.83361	0.528211	0.538054	-0.0279201	1.05562	42.8096	44.2376	6.5429
CREB/ATF/1	same	14.5	44	37.0353	38.3043	6.18905	0.112157	0.361015	1.12533	0.952259	38.892	40.2246	6.23634
CREB/ATF/1	opp	14.5	48	46.271	47.794	6.91332	0.363365	0.475381	0.250102	1.05562	43.8328	45.2756	6.62064
CREB/ATF/1	same	15.5	34	38.3724	39.8997	6.31662	0.27138	0.457444	-0.69221	0.952259	40.2962	41.9	6.34793
CREB/ATF/1	opp	15.5	47	46.2196	48.0531	6.93204	0.416079	0.48578	0.112573	1.05562	43.7842	45.5211	6.61696
CREB/ATF/1	same	16.5	33	40.2173	41.6865	6.45651	0.143708	0.394016	-1.11783	0.952259	42.2336	43.7765	6.49874
CREB/ATF/1	opp	16.5	45	40.9533	42.3513	6.50779	0.234671	0.443554	0.621818	1.05562	38.7954	40.1197	6.2286
CREB/ATF/1	same	17.5	39	42.3235	43.5669	6.60052	0.339811	0.468403	-0.503517	0.952259	44.4453	45.7511	6.66673
CREB/ATF/1	opp	17.5	42	44.4957	46.0986	6.7896	0.391193	0.484425	-0.367573	1.05562	42.1511	43.6696	6.49239
CREB/ATF/1	same	18.5	36	40.2348	41.5561	6.4464	0.283832	0.457444	-0.656928	0.952259	42.252	43.6395	6.50015
CREB/ATF/1	opp	18.5	48	47.0824	49.2361	7.01684	0.409121	0.484497	0.130776	1.05562	44.6015	46.6417	6.67843
CREB/ATF/1	same	19.5	30	39.8088	41.1963	6.41843	0.0653093	0.32201	-1.52823	0.952259	41.8046	43.2616	6.46565
CREB/ATF/1	opp	19.5	44	48.3041	50.6708	7.11834	0.297916	0.457514	-0.604649	1.05562	45.7588	48.0009	6.76453
CREB/ATF/1	opp	20.5	49	47.1128	49.0973	7.00695	0.356045	0.475381	0.26933	1.05562	44.6303	46.5102	6.68059
CREB/ATF/1	same	20.5	39	40.256	41.6442	6.45323	0.462911	0.503928	-0.194635	0.952259	42.2742	43.732	6.50186
CREB/ATF/1	opp	21.5	51	45.0399	46.778	6.83944	0.167228	0.394016	0.871426	1.05562	42.6667	44.3131	6.53197
CREB/ATF/1	same	21.5	47	44.5834	46.152	6.79353	0.323863	0.468403	0.355716	0.952259	46.8186	48.4658	6.84241
CREB/ATF/1	opp	22.5	69	48.3788	50.1626	7.08256	0.00204748	0.0880415	2.91154	1.05562	45.8296	47.5194	6.76976
CREB/ATF/1	same	22.5	51	45.02	46.8274	6.84305	0.166466	0.394016	0.873883	0.952259	47.277	49.175	6.87583
CREB/ATF/1	opp	23.5	40	50.1659	51.8156	7.1983	0.0825622	0.336995	-1.41226	1.05562	47.5225	49.0853	6.89366
CREB/ATF/1	same	23.5	40	42.3088	43.9583	6.63011	0.399663	0.484497	-0.348232	0.952259	44.4299	46.1621	6.66558
CREB/ATF/1	opp	24.5	42	48.3219	50.0749	7.07636	0.203078	0.415826	-0.893377	1.05562	45.7757	47.4363	6.76577
CREB/ATF/1	same	24.5	39	42.4183	44.0111	6.63409	0.334546	0.468403	-0.51526	0.952259	44.5449	46.2176	6.6742
CREB/ATF/1	opp	25.5	33	48.1239	49.8714	7.06197	0.0137043	0.265713	-2.1416	1.05562	45.5882	47.2435	6.7519
CREB/ATF/1	same	25.5	31	41.9551	43.4882	6.59456	0.0482335	0.300073	-1.66124	0.952259	44.0585	45.6685	6.63766
CREB/ATF/1	same	26.5	52	41.1213	42.794	6.54171	0.0421935	0.300073	1.66298	0.952259	43.1829	44.9395	6.57137
CREB/ATF/1	opp	26.5	54	48.5047	50.1034	7.07838	0.192844	0.403923	0.776346	1.05562	45.9489	47.4633	6.77856
CREB/ATF/1	same	27.5	33	40.0118	41.3526	6.4306	0.150979	0.394016	-1.09038	0.952259	42.0178	43.4258	6.48211
CREB/ATF/1	opp	27.5	42	47.8269	49.4117	7.02934	0.223438	0.43672	-0.828945	1.05562	45.3068	46.808	6.73103
CREB/ATF/1	opp	28.5	37	48.6339	50.4519	7.10295	0.0505937	0.300073	-1.63789	1.05562	46.0712	47.7935	6.78758
CREB/ATF/1	same	28.5	34	40.1311	41.4594	6.4389	0.188362	0.403923	-0.952197	0.952259	42.143	43.5379	6.49177
CREB/ATF/1	same	29.5	31	38.5997	40.0134	6.32561	0.124467	0.375648	-1.20142	0.952259	40.5349	42.0194	6.3667
CREB/ATF/1	opp	29.5	46	49.3201	51.0369	7.14401	0.351432	0.475381	-0.464738	1.05562	46.7213	48.3477	6.8353
CREB/ATF/1	opp	30.5	43	51.4569	53.2523	7.29742	0.132233	0.388172	-1.15889	1.05562	48.7455	50.4463	6.9818
CREB/ATF/1	same	30.5	39	39.2517	40.4799	6.36238	0.526407	0.538054	-0.0395651	0.952259	41.2196	42.5093	6.42025
CREB/ATF/1	same	31.5	30	38.5165	39.9066	6.31717	0.0946052	0.346215	-1.34815	0.952259	40.4475	41.9073	6.35984
CREB/ATF/1	opp	31.5	47	50.9597	52.8415	7.26921	0.320389	0.468403	-0.544719	1.05562	48.2745	50.0571	6.94798
CREB/ATF/1	same	32.5	44	38.3288	39.6657	6.29807	0.159136	0.394016	0.900468	0.952259	40.2504	41.6543	6.34432
CREB/ATF/1	opp	32.5	48	51.6549	53.5044	7.31467	0.337218	0.468403	-0.499673	1.05562	48.9331	50.6851	6.99522
CREB/ATF/1	opp	33.5	40	52.6943	54.5365	7.38488	0.0420098	0.300073	-1.71896	1.05562	49.9177	51.6628	7.06525
CREB/ATF/1	same	33.5	44	38.7639	40.0518	6.32865	0.1772	0.403923	0.827359	0.952259	40.7073	42.0598	6.38023
CREB/ATF/1	same	34.5	36	40.0502	41.3553	6.43081	0.293648	0.457444	-0.629804	0.952259	42.058	43.4286	6.48522
CREB/ATF/1	opp	34.5	49	50.5758	52.2193	7.2263	0.448979	0.502423	-0.218068	1.05562	47.9109	49.4678	6.92177
CREB/ATF/1	same	35.5	32	40.8823	42.1215	6.4901	0.0912718	0.341277	-1.3686	0.952259	42.932	44.2332	6.55225
CREB/ATF/1	opp	35.5	45	48.6672	50.3073	7.09276	0.331836	0.468403	-0.51704	1.05562	46.1028	47.6565	6.78991
CREB/ATF/1	same	36.5	32	40.1739	41.5171	6.44338	0.110212	0.361015	-1.26858	0.952259	42.188	43.5986	6.49523
CREB/ATF/1	opp	36.5	50	51.1188	53.002	7.28025	0.474758	0.508785	-0.153679	1.05562	48.4252	50.2092	6.95882
CREB/ATF/1	opp	37.5	43	49.0328	50.7517	7.12402	0.217282	0.432221	-0.84683	1.05562	46.4492	48.0775	6.81536
CREB/ATF/1	same	37.5	37	40.1991	41.5958	6.44948	0.343133	0.468403	-0.496018	0.952259	42.2144	43.6812	6.49726
CREB/ATF/1	same	38.5	40	39.8142	41.2227	6.42049	0.446389	0.502423	0.0289352	0.952259	41.8103	43.2893	6.46609
CREB/ATF/1	opp	38.5	49	50.0154	51.8291	7.19925	0.480327	0.509977	-0.141036	1.05562	47.3799	49.0981	6.88331
CREB/ATF/1	opp	39.5	38	50.1231	52.0654	7.21564	0.0457433	0.300073	-1.68012	1.05562	47.482	49.322	6.89072
CREB/ATF/1	same	39.5	37	41.1708	42.5949	6.52648	0.289631	0.457444	-0.639055	0.952259	43.2348	44.7304	6.57532
CREB/ATF/1	same	40.5	28	42.8225	44.2504	6.6521	0.0105986	0.260423	-2.22825	0.952259	44.9694	46.4689	6.70592
CREB/ATF/1	opp	40.5	41	48.4161	50.1486	7.08157	0.159987	0.394016	-1.04724	1.05562	45.8649	47.5061	6.77236
CREB/ATF/1	opp	41.5	36	48.7552	50.5639	7.11083	0.0349494	0.300073	-1.79378	1.05562	46.1862	47.8995	6.79604
CREB/ATF/1	same	41.5	36	42.443	43.8446	6.62153	0.18179	0.403923	-0.973045	0.952259	44.5709	46.0427	6.67614
CREB/ATF/1	opp	42.5	40	51.0108	52.6479	7.25589	0.0664448	0.32201	-1.51749	1.05562	48.3229	49.8738	6.95147
CREB/ATF/1	same	42.5	44	40.9667	42.3719	6.50937	0.284302	0.457444	0.465984	0.952259	43.0206	44.4962	6.55901
CREB/ATF/1	opp	43.5	33	49.1107	50.9498	7.13791	0.00965891	0.260423	-2.25706	1.05562	46.5229	48.2651	6.82077
CREB/ATF/1	same	43.5	54	45.085	46.9811	6.85427	0.0835984	0.336995	1.30064	0.952259	47.3453	49.3364	6.8808
CREB/ATF/2	opp	-42.5	27	24.3704	25.2419	5.02413	0.256463	0.432041	0.523401	0.907751	26.847	27.807	5.18141
CREB/ATF/2	same	-42.5	22	24.7903	25.5295	5.05267	0.332445	0.457743	-0.552243	1.02233	24.2488	24.9718	4.92431
CREB/ATF/2	same	-41.5	16	24.0332	24.8818	4.98817	0.0555398	0.432041	-1.61046	1.02233	23.5083	24.3383	4.84853
CREB/ATF/2	opp	-41.5	30	23.892	24.7806	4.97801	0.0919824	0.432041	1.227	0.907751	26.32	27.2989	5.1303
CREB/ATF/2	same	-40.5	20	24.0532	24.8051	4.98047	0.239336	0.432041	-0.813815	1.02233	23.5278	24.2633	4.85055
CREB/ATF/2	opp	-40.5	23	22.9249	23.6884	4.86707	0.438626	0.487804	0.0154305	0.907751	25.2546	26.0956	5.0254
CREB/ATF/2	same	-39.5	16	26.3528	27.4144	5.23587	0.0213069	0.410358	-1.97728	1.02233	25.7772	26.8156	5.07712
CREB/ATF/2	opp	-39.5	31	22.6896	23.5076	4.84846	0.0376125	0.410358	1.71402	0.907751	24.9954	25.8965	4.99954
CREB/ATF/2	opp	-38.5	18	22.5429	23.3072	4.82775	0.199726	0.432041	-0.941003	0.907751	24.8338	25.6758	4.98335
CREB/ATF/2	same	-38.5	21	25.0516	26.0176	5.10074	0.244124	0.432041	-0.794312	1.02233	24.5044	25.4493	4.95019
CREB/ATF/2	same	-37.5	18	25.0511	26.0105	5.10005	0.0904378	0.432041	-1.38256	1.02233	24.504	25.4424	4.95015
CREB/ATF/2	opp	-37.5	23	23.4094	24.1951	4.91885	0.521254	0.539651	-0.08324	0.907751	25.7884	26.6539	5.07823
CREB/ATF/2	opp	-36.5	28	22.5472	23.4026	4.83762	0.107924	0.432041	1.12717	0.907751	24.8385	25.7808	4.98382
CREB/ATF/2	same	-36.5	30	25.5566	26.4868	5.14653	0.16336	0.432041	0.863383	1.02233	24.9983	25.9082	4.99983
CREB/ATF/2	same	-35.5	21	25.0059	25.8534	5.08462	0.246933	0.432041	-0.787849	1.02233	24.4597	25.2887	4.94568
CREB/ATF/2	opp	-35.5	23	21.4061	22.0585	4.69664	0.315221	0.454061	0.33936	0.907751	23.5815	24.3001	4.85608
CREB/ATF/2	same	-34.5	29	26.1368	27.1048	5.20623	0.249359	0.432041	0.549955	1.02233	25.5659	26.5128	5.05627
CREB/ATF/2	opp	-34.5	23	22.4352	23.205	4.81716	0.39815	0.469175	0.117238	0.907751	24.7152	25.5632	4.97144
CREB/ATF/2	same	-33.5	25	26.1648	26.96	5.19231	0.461107	0.504067	-0.224328	1.02233	25.5933	26.3712	5.05898
CREB/ATF/2	opp	-33.5	22	22.8244	23.5903	4.85698	0.486875	0.516204	-0.16973	0.907751	25.1439	25.9876	5.01437
CREB/ATF/2	same	-32.5	28	25.7298	26.5544	5.1531	0.284619	0.43817	0.440555	1.02233	25.1678	25.9744	5.01675
CREB/ATF/2	opp	-32.5	24	22.6209	23.3579	4.833	0.335585	0.457743	0.285354	0.907751	24.9197	25.7316	4.99196
CREB/ATF/2	opp	-31.5	27	22.3602	23.1141	4.80771	0.139401	0.432041	0.965079	0.907751	24.6325	25.4631	4.96311
CREB/ATF/2	same	-31.5	28	25.4065	26.3188	5.13018	0.262901	0.432041	0.505535	1.02233	24.8516	25.7439	4.98513
CREB/ATF/2	same	-30.5	31	25.836	26.7321	5.17031	0.133769	0.432041	0.998787	1.02233	25.2716	26.1482	5.02709
CREB/ATF/2	opp	-30.5	26	21.6742	22.447	4.73783	0.150098	0.432041	0.913025	0.907751	23.8769	24.7282	4.88639
CREB/ATF/2	opp	-29.5	31	21.9131	22.6555	4.75978	0.0253369	0.410358	1.90911	0.907751	24.14	24.9578	4.91324
CREB/ATF/2	same	-29.5	29	25.8134	26.746	5.17166	0.229199	0.432041	0.616166	1.02233	25.2496	26.1618	5.02489
CREB/ATF/2	opp	-28.5	29	22.2301	22.961	4.79176	0.0666282	0.432041	1.41282	0.907751	24.4892	25.2944	4.94866
CREB/ATF/2	same	-28.5	22	27.4364	28.5134	5.33979	0.173607	0.432041	-1.01809	1.02233	26.8371	27.8906	5.18045
CREB/ATF/2	same	-27.5	31	26.1706	27.091	5.2049	0.148988	0.432041	0.927848	1.02233	25.599	26.4993	5.05954
CREB/ATF/2	opp	-27.5	20	20.8476	21.516	4.63853	0.484234	0.516204	-0.182732	0.907751	22.9662	23.7025	4.79231
CREB/ATF/2	same	-26.5	20	26.5426	27.4796	5.2421	0.117356	0.432041	-1.24809	1.02233	25.9628	26.8793	5.09538
CREB/ATF/2	opp	-26.5	23	20.644	21.2731	4.61228	0.257548	0.432041	0.510808	0.907751	22.7419	23.4349	4.76885
CREB/ATF/2	same	-25.5	28	26.5153	27.3782	5.23242	0.339853	0.457743	0.283742	1.02233	25.9362	26.7802	5.09276
CREB/ATF/2	opp	-25.5	20	21.8302	22.6364	4.75777	0.400749	0.469175	-0.384669	0.907751	24.0486	24.9368	4.90394
CREB/ATF/2	opp	-24.5	26	21.3305	22.0949	4.70053	0.132844	0.432041	0.993403	0.907751	23.4982	24.3403	4.84749
CREB/ATF/2	same	-24.5	25	25.255	26.061	5.105	0.532652	0.546551	-0.0499511	1.02233	24.7034	25.4918	4.97025
CREB/ATF/2	opp	-23.5	19	22.8411	23.6799	4.86619	0.247853	0.432041	-0.789347	0.907751	25.1623	26.0863	5.0162
CREB/ATF/2	same	-23.5	22	25.0029	25.9196	5.09113	0.317327	0.454061	-0.589838	1.02233	24.4568	25.3535	4.94538
CREB/ATF/2	opp	-22.5	26	22.1012	22.8883	4.78417	0.173231	0.432041	0.814932	0.907751	24.3472	25.2143	4.93429
CREB/ATF/2	same	-22.5	21	24.7728	25.5817	5.05784	0.261598	0.432041	-0.745924	1.02233	24.2316	25.0229	4.92257
CREB/ATF/2	same	-21.5	31	26.5412	27.4525	5.23951	0.16697	0.432041	0.850988	1.02233	25.9615	26.8529	5.09524
CREB/ATF/2	opp	-21.5	21	22.4282	23.2753	4.82445	0.435756	0.487804	-0.296036	0.907751	24.7074	25.6406	4.97066
CREB/ATF/2	opp	-20.5	25	23.222	24.243	4.92372	0.308716	0.454061	0.361112	0.907751	25.5819	26.7066	5.05785
CREB/ATF/2	same	-20.5	28	26.3987	27.3083	5.22573	0.331464	0.457743	0.306425	1.02233	25.8221	26.7118	5.08154
CREB/ATF/2	same	-19.5	30	24.5961	25.4757	5.04734	0.119092	0.432041	1.07064	1.02233	24.0588	24.9192	4.90498
CREB/ATF/2	opp	-19.5	22	23.8702	24.6873	4.96864	0.401849	0.469175	-0.376395	0.907751	26.2959	27.1962	5.12796
CREB/ATF/2	same	-18.5	19	24.8714	25.7528	5.07472	0.138999	0.432041	-1.15699	1.02233	24.3281	25.1903	4.93236
CREB/ATF/2	opp	-18.5	23	22.9164	23.6276	4.86083	0.437921	0.487804	0.0171982	0.907751	25.2452	26.0287	5.02446
CREB/ATF/2	opp	-17.5	24	22.3676	23.0989	4.80613	0.316024	0.454061	0.339643	0.907751	24.6407	25.4463	4.96394
CREB/ATF/2	same	-17.5	23	22.1284	22.955	4.79114	0.373014	0.457743	0.181911	1.02233	21.6451	22.4536	4.65243
CREB/ATF/2	same	-16.5	17	23.3369	24.2308	4.92248	0.109652	0.432041	-1.28735	1.02233	22.8272	23.7015	4.77778
CREB/ATF/2	opp	-16.5	19	23.1788	24.0515	4.90423	0.226633	0.432041	-0.852086	0.907751	25.5343	26.4957	5.05315
CREB/ATF/2	opp	-15.5	15	23.365	24.0883	4.90799	0.0448302	0.410358	-1.70437	0.907751	25.7394	26.5363	5.07341
CREB/ATF/2	same	-15.5	19	23.146	23.8859	4.88732	0.228638	0.432041	-0.848325	1.02233	22.6405	23.3642	4.7582
CREB/ATF/2	same	-14.5	32	21.8164	22.607	4.75469	0.0152246	0.410358	2.14181	1.02233	21.3398	22.1132	4.61951
CREB/ATF/2	opp	-14.5	24	20.8623	21.5706	4.64442	0.208833	0.432041	0.675576	0.907751	22.9824	23.7627	4.794
CREB/ATF/2	same	-13.5	27	24.5354	25.484	5.04817	0.267571	0.432041	0.488226	1.02233	23.9994	24.9273	4.89892
CREB/ATF/2	opp	-13.5	21	21.1019	21.8494	4.67433	0.548852	0.55516	-0.0217978	0.907751	23.2463	24.0698	4.82145
CREB/ATF/2	opp	-12.5	29	21.2302	21.8843	4.67807	0.0419752	0.410358	1.6609	0.907751	23.3877	24.1083	4.83608
CREB/ATF/2	same	-12.5	22	23.9909	24.8957	4.98956	0.392409	0.469175	-0.399005	1.02233	23.4668	24.3519	4.84426
CREB/ATF/2	same	-11.5	26	23.371	24.2364	4.92305	0.252241	0.432041	0.534026	1.02233	22.8605	23.707	4.78126
CREB/ATF/2	opp	-11.5	24	23.2237	24.0775	4.90689	0.383267	0.465207	0.158208	0.907751	25.5838	26.5244	5.05804
CREB/ATF/2	opp	-10.5	19	22.9608	23.7013	4.8684	0.240187	0.432041	-0.813581	0.907751	25.2942	26.1099	5.02933
CREB/ATF/2	same	-10.5	21	23.2369	23.9463	4.8935	0.3708	0.457743	-0.457112	1.02233	22.7293	23.4233	4.76753
CREB/ATF/2	same	-9.5	18	23.5998	24.37	4.93659	0.145587	0.432041	-1.13434	1.02233	23.0843	23.8377	4.80461
CREB/ATF/2	opp	-9.5	19	23.1518	23.9753	4.89646	0.228288	0.432041	-0.84791	0.907751	25.5045	26.4118	5.0502
CREB/ATF/2	opp	-8.5	30	24.6004	25.4958	5.04934	0.119271	0.432041	1.06938	0.907751	27.1003	28.0868	5.2058
CREB/ATF/2	same	-8.5	21	22.5071	23.3226	4.82935	0.429247	0.487804	-0.312061	1.02233	22.0154	22.8132	4.69206
CREB/ATF/2	same	-7.5	13	20.8994	21.6767	4.65582	0.0452885	0.410358	-1.69666	1.02233	20.4429	21.2032	4.52138
CREB/ATF/2	opp	-7.5	38	31.6928	32.9122	5.73692	0.115444	0.432041	1.09941	0.907751	34.9135	36.2569	5.90877
CREB/ATF/2	opp	-6.5	52	31.1633	32.3486	5.68759	0.000228677	0.0402471	3.66355	0.907751	34.3302	35.636	5.8592
CREB/ATF/2	same	-6.5	16	19.1445	19.7244	4.44121	0.281004	0.437671	-0.708017	1.02233	18.7263	19.2935	4.32739
CREB/ATF/2	same	-5.5	5	14.2896	14.7926	3.84612	0.00454751	0.400181	-2.41533	1.02233	13.9775	14.4695	3.73865
CREB/ATF/2	opp	-5.5	34	29.6333	30.434	5.5167	0.183791	0.432041	0.791539	0.907751	32.6448	33.5268	5.71356
CREB/ATF/2	same	-4.5	2	5.70138	5.85795	2.42032	0.0766983	0.432041	-1.52929	1.02233	5.57684	5.72999	2.36153
CREB/ATF/2	opp	-4.5	49	47.1569	48.6628	6.97587	0.358461	0.457743	0.264216	0.907751	51.9491	53.6081	7.20757
CREB/ATF/2	opp	-3.5	3	0.955213	0.972281	0.986043	0.0163642	0.410358	2.07373	0.907751	1.05229	1.07109	1.02581
CREB/ATF/2	same	-3.5	8	9.67328	9.73257	3.11971	0.370781	0.457743	-0.536358	1.02233	9.46199	9.51998	3.07603
CREB/ATF/2	opp	-2.5	3	0.971427	0.985737	0.992843	0.017286	0.410358	2.0432	0.907751	1.07015	1.08591	1.03448
CREB/ATF/2	same	-2.5	5	8.97197	9.12828	3.0213	0.117403	0.432041	-1.31465	1.02233	8.77599	8.92889	2.96243
CREB/ATF/2	opp	-1.5	80	93.8135	97.1478	9.85636	0.0820401	0.432041	-1.40148	0.907751	103.347	107.02	10.166
CREB/ATF/2	same	-1.5	0	0	0	0	1	1	0	1.02233	0	0	0
CREB/ATF/2	opp	-0.5	11	13.9647	14.4913	3.80674	0.263026	0.432041	-0.778811	0.907751	15.3839	15.9639	3.92223
CREB/ATF/2	same	-0.5	0	0.399587	0.399078	0.631727	0.670597	0.674429	-0.632531	1.02233	0.390859	0.390361	0.625187
CREB/ATF/2	opp	0.5	19	14.0563	14.4209	3.79748	0.0788277	0.432041	1.30184	1.03196	14.4931	14.8691	3.80699
CREB/ATF/2	same	0.5	1	2.8103	2.88648	1.69897	0.229331	0.432041	-1.06553	1.0608	2.69815	2.77129	1.6426
CREB/ATF/2	same	1.5	7	5.22048	5.36553	2.31636	0.157391	0.432041	0.76824	1.0608	4.92126	5.05799	2.21839
CREB/ATF/2	opp	1.5	6	5.23691	5.5794	2.36208	0.273214	0.433377	0.323058	1.03196	5.0747	5.40658	2.25271
CREB/ATF/2	opp	2.5	5	3.36682	3.5221	1.87673	0.125298	0.432041	0.870229	1.03196	3.26253	3.41301	1.80625
CREB/ATF/2	same	2.5	44	44.5451	46.3359	6.80705	0.507297	0.529023	-0.0800715	1.0608	41.9919	43.6801	6.48011
CREB/ATF/2	same	3.5	1	2.93514	2.97539	1.72493	0.209047	0.432041	-1.12186	1.0608	2.76691	2.80485	1.6634
CREB/ATF/2	opp	3.5	21	22.2881	22.8937	4.78473	0.447403	0.492143	-0.269213	1.03196	21.5977	22.1846	4.64734
CREB/ATF/2	opp	4.5	13	10.448	10.5007	3.24047	0.170343	0.432041	0.787534	1.03196	10.1244	10.1754	3.18189
CREB/ATF/2	same	4.5	1	2.70526	2.72852	1.65182	0.247707	0.432041	-1.03235	1.0608	2.5502	2.57213	1.59694
CREB/ATF/2	same	5.5	30	44.779	46.5402	6.82204	0.0125746	0.410358	-2.16637	1.0608	42.2124	43.8726	6.49711
CREB/ATF/2	opp	5.5	5	6.27531	6.47788	2.54517	0.402531	0.469175	-0.50107	1.03196	6.08093	6.27723	2.46595
CREB/ATF/2	same	6.5	35	25.2784	26.0052	5.09953	0.0258087	0.410358	1.90636	1.0608	23.8296	24.5147	4.88155
CREB/ATF/2	opp	6.5	19	19.2908	20.013	4.47359	0.534129	0.546551	-0.0650019	1.03196	18.6933	19.3931	4.32357
CREB/ATF/2	opp	7.5	16	22.2634	22.8777	4.78306	0.106838	0.432041	-1.3095	1.03196	21.5738	22.1691	4.64476
CREB/ATF/2	same	7.5	28	26.5546	27.525	5.24642	0.342686	0.457743	0.275508	1.0608	25.0325	25.9473	5.00325
CREB/ATF/2	same	8.5	29	26.752	27.7171	5.2647	0.289655	0.43817	0.426995	1.0608	25.2187	26.1284	5.02182
CREB/ATF/2	opp	8.5	28	26.7053	27.7879	5.27143	0.35363	0.457743	0.245609	1.03196	25.8781	26.9272	5.08705
CREB/ATF/2	opp	9.5	19	28.3471	29.3678	5.41921	0.0419605	0.410358	-1.72481	1.03196	27.4691	28.4581	5.24109
CREB/ATF/2	same	9.5	24	24.1821	24.9524	4.99523	0.539226	0.548576	-0.0364579	1.0608	22.7961	23.5222	4.77452
CREB/ATF/2	same	10.5	28	24.0521	24.9137	4.99137	0.180336	0.432041	0.79094	1.0608	22.6735	23.4858	4.76167
CREB/ATF/2	opp	10.5	32	27.8813	28.9226	5.37797	0.188633	0.432041	0.765846	1.03196	27.0177	28.0267	5.19785
CREB/ATF/2	same	11.5	31	23.1444	23.9293	4.89176	0.0466316	0.410358	1.60589	1.0608	21.8178	22.5577	4.67096
CREB/ATF/2	opp	11.5	29	26.5497	27.4742	5.24158	0.276142	0.433938	0.467475	1.03196	25.7273	26.6232	5.07221
CREB/ATF/2	same	12.5	34	24.9872	25.7674	5.07616	0.033639	0.410358	1.77552	1.0608	23.555	24.2904	4.85335
CREB/ATF/2	opp	12.5	26	25.4822	26.3516	5.13339	0.407786	0.472174	0.100862	1.03196	24.6929	25.5354	4.9692
CREB/ATF/2	same	13.5	26	22.5831	23.3917	4.8365	0.201505	0.432041	0.706483	1.0608	21.2887	22.051	4.61397
CREB/ATF/2	opp	13.5	29	26.4017	27.3034	5.22526	0.266417	0.432041	0.497249	1.03196	25.584	26.4577	5.05806
CREB/ATF/2	same	14.5	14	22.54	23.3497	4.83215	0.0379449	0.410358	-1.76733	1.0608	21.2481	22.0114	4.60957
CREB/ATF/2	opp	14.5	26	27.4579	28.5547	5.34366	0.439692	0.487804	-0.272833	1.03196	26.6074	27.6703	5.15824
CREB/ATF/2	opp	15.5	19	25.5445	26.3333	5.1316	0.112406	0.432041	-1.27533	1.03196	24.7533	25.5176	4.97526
CREB/ATF/2	same	15.5	24	23.3888	24.1664	4.91593	0.396525	0.469175	0.124339	1.0608	22.0482	22.7812	4.69555
CREB/ATF/2	opp	16.5	27	25.4416	26.2084	5.11941	0.331591	0.457743	0.304416	1.03196	24.6535	25.3966	4.96523
CREB/ATF/2	same	16.5	24	25.113	25.886	5.08783	0.464437	0.504573	-0.218748	1.0608	23.6736	24.4023	4.86555
CREB/ATF/2	opp	17.5	29	24.4504	25.3461	5.0345	0.153499	0.432041	0.903682	1.03196	23.6931	24.5611	4.86755
CREB/ATF/2	same	17.5	24	24.6335	25.4023	5.04007	0.502734	0.529023	-0.12569	1.0608	23.2216	23.9463	4.81888
CREB/ATF/2	same	18.5	18	25.7011	26.5791	5.15549	0.0719913	0.432041	-1.49377	1.0608	24.228	25.0556	4.92219
CREB/ATF/2	opp	18.5	27	25.3904	26.5047	5.14828	0.327858	0.457743	0.312652	1.03196	24.6039	25.6838	4.96023
CREB/ATF/2	same	19.5	27	25.6425	26.5164	5.1494	0.346351	0.457743	0.263631	1.0608	24.1727	24.9965	4.91658
CREB/ATF/2	opp	19.5	23	24.4001	25.4209	5.04191	0.440687	0.487804	-0.277685	1.03196	23.6443	24.6335	4.86254
CREB/ATF/2	opp	20.5	21	25.4422	26.5351	5.15122	0.22094	0.432041	-0.862359	1.03196	24.6541	25.7132	4.96529
CREB/ATF/2	same	20.5	24	26.7916	27.7265	5.2656	0.338543	0.457743	-0.530157	1.0608	25.256	26.1373	5.02553
CREB/ATF/2	opp	21.5	34	25.9949	26.8883	5.18539	0.0527284	0.432041	1.54379	1.03196	25.1897	26.0554	5.01893
CREB/ATF/2	same	21.5	33	27.9775	29.0101	5.3861	0.14849	0.432041	0.93249	1.0608	26.3739	27.3473	5.13556
CREB/ATF/2	opp	22.5	22	28.2415	29.1692	5.40085	0.138343	0.432041	-1.15565	1.03196	27.3667	28.2657	5.23132
CREB/ATF/2	same	22.5	29	26.3017	27.1911	5.2145	0.259921	0.432041	0.517459	1.0608	24.7942	25.6325	4.97938
CREB/ATF/2	same	23.5	17	26.0048	26.8724	5.18386	0.0410257	0.410358	-1.73709	1.0608	24.5143	25.3322	4.95119
CREB/ATF/2	opp	23.5	27	27.9809	28.9654	5.38195	0.4763	0.511152	-0.182258	1.03196	27.1142	28.0682	5.20713
CREB/ATF/2	opp	24.5	23	27.3407	28.3858	5.32783	0.23577	0.432041	-0.814721	1.03196	26.4938	27.5065	5.14722
CREB/ATF/2	same	24.5	22	26.1387	27.0507	5.20103	0.243312	0.432041	-0.795754	1.0608	24.6406	25.5003	4.96393
CREB/ATF/2	opp	25.5	32	28.7008	29.7651	5.45574	0.234262	0.432041	0.604713	1.03196	27.8118	28.8432	5.27369
CREB/ATF/2	same	25.5	26	25.6369	26.622	5.15966	0.419806	0.482914	0.0703638	1.0608	24.1675	25.0962	4.91605
CREB/ATF/2	opp	26.5	18	27.7941	28.7737	5.36411	0.032579	0.410358	-1.82586	1.03196	26.9332	27.8824	5.18972
CREB/ATF/2	same	26.5	22	24.3028	25.0725	5.00725	0.368458	0.457743	-0.459891	1.0608	22.9098	23.6354	4.78642
CREB/ATF/2	opp	27.5	23	26.9897	27.959	5.28763	0.256536	0.432041	-0.754542	1.03196	26.1537	27.093	5.11407
CREB/ATF/2	same	27.5	22	25.6562	26.5594	5.15358	0.273323	0.433377	-0.709445	1.0608	24.1856	25.0371	4.91789
CREB/ATF/2	same	28.5	18	25.1399	25.9554	5.09464	0.0877111	0.432041	-1.40145	1.0608	23.6989	24.4677	4.86816
CREB/ATF/2	opp	28.5	29	25.8426	26.7943	5.17632	0.23099	0.432041	0.609963	1.03196	25.0422	25.9644	5.00422
CREB/ATF/2	opp	29.5	21	28.2122	29.1862	5.40242	0.0991176	0.432041	-1.33499	1.03196	27.3383	28.2821	5.22861
CREB/ATF/2	same	29.5	30	25.564	26.4133	5.13939	0.163735	0.432041	0.863135	1.0608	24.0988	24.8994	4.90905
CREB/ATF/2	opp	30.5	32	26.9759	27.8494	5.27726	0.144283	0.432041	0.952032	1.03196	26.1403	26.9868	5.11276
CREB/ATF/2	same	30.5	20	25.2871	26.234	5.12191	0.171012	0.432041	-1.03225	1.0608	23.8377	24.7304	4.88239
CREB/ATF/2	same	31.5	20	25.8178	26.6101	5.15849	0.146456	0.432041	-1.12781	1.0608	24.338	25.0849	4.93336
CREB/ATF/2	opp	31.5	30	25.8173	26.7761	5.17457	0.176795	0.432041	0.808313	1.03196	25.0176	25.9468	5.00176
CREB/ATF/2	opp	32.5	24	28.2345	29.2035	5.40403	0.246047	0.432041	-0.783589	1.03196	27.36	28.299	5.23068
CREB/ATF/2	same	32.5	22	25.8536	26.6783	5.1651	0.260779	0.432041	-0.746092	1.0608	24.3718	25.1492	4.93678
CREB/ATF/2	same	33.5	17	24.2689	25.009	5.0009	0.0791479	0.432041	-1.45351	1.0608	22.8779	23.5756	4.78308
CREB/ATF/2	opp	33.5	28	28.5605	29.4481	5.42661	0.507982	0.529023	-0.10328	1.03196	27.6758	28.536	5.26078
CREB/ATF/2	same	34.5	22	25.0137	25.7796	5.07737	0.316575	0.454061	-0.593546	1.0608	23.5799	24.302	4.85592
CREB/ATF/2	opp	34.5	24	26.4836	27.3597	5.23065	0.360378	0.457743	-0.474813	1.03196	25.6633	26.5122	5.06589
CREB/ATF/2	opp	35.5	32	28.5377	29.6906	5.44891	0.224794	0.432041	0.63541	1.03196	27.6538	28.771	5.25868
CREB/ATF/2	same	35.5	26	23.9187	24.7233	4.97225	0.290356	0.43817	0.418579	1.0608	22.5478	23.3063	4.74845
CREB/ATF/2	opp	36.5	23	28.664	29.6843	5.44833	0.167624	0.432041	-1.03958	1.03196	27.7761	28.7649	5.2703
CREB/ATF/2	same	36.5	24	24.9928	25.8261	5.08194	0.473973	0.511152	-0.195354	1.0608	23.5603	24.3458	4.85389
CREB/ATF/2	same	37.5	35	24.0843	24.8434	4.98431	0.013792	0.410358	2.19002	1.0608	22.7038	23.4194	4.76485
CREB/ATF/2	opp	37.5	25	27.3207	28.3097	5.32069	0.374517	0.457743	-0.436168	1.03196	26.4745	27.4329	5.14533
CREB/ATF/2	opp	38.5	20	27.5216	28.5862	5.3466	0.0855105	0.432041	-1.4068	1.03196	26.6691	27.7007	5.16421
CREB/ATF/2	same	38.5	21	24.2071	25.0331	5.00331	0.299359	0.446502	-0.640991	1.0608	22.8196	23.5983	4.77699
CREB/ATF/2	same	39.5	18	24.6812	25.4936	5.04912	0.102563	0.432041	-1.32324	1.0608	23.2665	24.0324	4.82354
CREB/ATF/2	opp	39.5	28	26.6786	27.5787	5.25154	0.351684	0.457743	0.251626	1.03196	25.8522	26.7245	5.08451
CREB/ATF/2	opp	40.5	19	26.9031	27.81	5.27352	0.0711034	0.432041	-1.49864	1.03196	26.0698	26.9486	5.10586
CREB/ATF/2	same	40.5	18	24.8534	25.7025	5.06976	0.0967652	0.432041	-1.35181	1.0608	23.4289	24.2293	4.84034
CREB/ATF/2	opp	41.5	20	27.1667	27.9963	5.29115	0.096126	0.432041	-1.35447	1.03196	26.3252	27.1291	5.13081
CREB/ATF/2	same	41.5	22	24.2439	24.8993	4.98992	0.372932	0.457743	-0.449678	1.0608	22.8543	23.4722	4.78061
CREB/ATF/2	opp	42.5	23	26.4398	27.3723	5.23185	0.291284	0.43817	-0.657478	1.03196	25.6209	26.5244	5.06171
CREB/ATF/2	same	42.5	27	25.8215	26.7934	5.17623	0.359636	0.457743	0.227684	1.0608	24.3415	25.2577	4.93371
CREB/ATF/2	opp	43.5	21	25.9604	26.7622	5.17322	0.192544	0.432041	-0.958855	1.03196	25.1563	25.9333	5.0156
CREB/ATF/2	same	43.5	23	25.3263	26.0844	5.10729	0.369305	0.457743	-0.455481	1.0608	23.8746	24.5893	4.88617
CREB/ATF/2	opp	44.5	29	25.8286	26.7286	5.16998	0.23013	0.432041	0.613426	1.03196	25.0286	25.9007	5.00286
CREB/ATF/2	same	44.5	28	25.3243	26.1362	5.11236	0.257485	0.432041	0.523386	1.0608	23.8728	24.6382	4.88598
CREB/ATF/3	opp	-42.5	21	17.4204	17.8446	4.22428	0.16322	0.477788	0.847388	1.04534	16.6649	17.0706	4.08226
CREB/ATF/3	same	-42.5	9	12.0217	12.3806	3.51861	0.240498	0.51619	-0.858789	0.909323	13.2205	13.6152	3.63601
CREB/ATF/3	opp	-41.5	24	19.6046	20.2772	4.50302	0.135619	0.448727	0.976092	1.04534	18.7544	19.3977	4.33063
CREB/ATF/3	same	-41.5	9	11.1829	11.6091	3.40722	0.320997	0.52506	-0.640664	0.909323	12.298	12.7668	3.50685
CREB/ATF/3	opp	-40.5	22	18.3794	18.9882	4.35755	0.16703	0.477788	0.830874	1.04534	17.5823	18.1647	4.19312
CREB/ATF/3	same	-40.5	12	12.4272	12.8791	3.58874	0.527226	0.568989	-0.119045	0.909323	13.6665	14.1634	3.69682
CREB/ATF/3	opp	-39.5	8	17.7495	18.3832	4.28756	0.00817461	0.276549	-2.2739	1.04534	16.9797	17.5859	4.12064
CREB/ATF/3	same	-39.5	7	14.0461	14.5354	3.81253	0.0308268	0.339095	-1.84815	0.909323	15.4468	15.9848	3.93024
CREB/ATF/3	same	-38.5	12	14.9766	15.4197	3.9268	0.269551	0.52506	-0.758034	0.909323	16.4701	16.9574	4.05834
CREB/ATF/3	opp	-38.5	16	15.5656	16.0464	4.00579	0.391022	0.52506	0.108446	1.04534	14.8905	15.3504	3.85882
CREB/ATF/3	opp	-37.5	17	15.9994	16.4749	4.05893	0.3406	0.52506	0.24652	1.04534	15.3055	15.7604	3.91222
CREB/ATF/3	same	-37.5	11	12.1798	12.5748	3.5461	0.441191	0.530576	-0.332716	0.909323	13.3944	13.8288	3.65984
CREB/ATF/3	same	-36.5	23	12.4993	12.9864	3.60367	0.00246263	0.172832	2.9139	0.909323	13.7457	14.2814	3.70752
CREB/ATF/3	opp	-36.5	21	16.2371	16.835	4.10305	0.0997052	0.439188	1.16081	1.04534	15.5329	16.1049	3.94118
CREB/ATF/3	opp	-35.5	19	16.1001	16.5993	4.07423	0.194817	0.509476	0.711756	1.04534	15.4019	15.8794	3.92452
CREB/ATF/3	same	-35.5	10	11.9127	12.3057	3.50795	0.356443	0.52506	-0.545262	0.909323	13.1007	13.5328	3.61949
CREB/ATF/3	same	-34.5	13	11.2977	11.5849	3.40366	0.246987	0.521318	0.500146	0.909323	12.4243	12.7401	3.52481
CREB/ATF/3	opp	-34.5	19	18.9743	19.7395	4.44292	0.43705	0.530576	0.00578708	1.04534	18.1514	18.8834	4.26044
CREB/ATF/3	opp	-33.5	27	16.6973	17.2283	4.1507	0.00707803	0.276549	2.48215	1.04534	15.9732	16.4811	3.99664
CREB/ATF/3	same	-33.5	10	12.3411	12.7353	3.56865	0.312515	0.52506	-0.656011	0.909323	13.5717	14.0052	3.68398
CREB/ATF/3	same	-32.5	14	11.9436	12.3252	3.51072	0.222896	0.509476	0.58575	0.909323	13.1346	13.5542	3.62417
CREB/ATF/3	opp	-32.5	15	16.5038	17.0244	4.12607	0.417661	0.52506	-0.364452	1.04534	15.788	16.2861	3.97341
CREB/ATF/3	same	-31.5	19	14.0872	14.614	3.82282	0.0801209	0.420899	1.28514	0.909323	15.4919	16.0713	3.93598
CREB/ATF/3	opp	-31.5	14	15.7206	16.2724	4.0339	0.393959	0.52506	-0.426529	1.04534	15.0388	15.5666	3.87798
CREB/ATF/3	same	-30.5	19	16.1505	16.7447	4.09202	0.198421	0.509476	0.696346	0.909323	17.7611	18.4144	4.21439
CREB/ATF/3	opp	-30.5	13	15.3465	15.8665	3.98328	0.330876	0.52506	-0.589099	1.04534	14.681	15.1784	3.83157
CREB/ATF/3	opp	-29.5	22	15.2339	15.7705	3.9712	0.037773	0.354714	1.70378	1.04534	14.5732	15.0865	3.81749
CREB/ATF/3	same	-29.5	12	17.1861	17.8498	4.2249	0.125905	0.439188	-1.22752	0.909323	18.8999	19.6297	4.34741
CREB/ATF/3	same	-28.5	11	13.3834	13.8329	3.71926	0.315444	0.52506	-0.640817	0.909323	14.7179	15.2123	3.8364
CREB/ATF/3	opp	-28.5	14	15.2373	15.7606	3.96997	0.441547	0.530576	-0.311674	1.04534	14.5765	15.0771	3.81792
CREB/ATF/3	same	-27.5	21	13.2491	13.6752	3.698	0.0170205	0.279116	2.09596	0.909323	14.5703	15.0389	3.81711
CREB/ATF/3	opp	-27.5	22	17.4226	18.2906	4.27675	0.114694	0.439188	1.0703	1.04534	16.667	17.4973	4.08252
CREB/ATF/3	opp	-26.5	15	16.7737	17.3161	4.16126	0.392225	0.52506	-0.426246	1.04534	16.0462	16.5651	4.00577
CREB/ATF/3	same	-26.5	13	13.8836	14.325	3.78484	0.476831	0.549729	-0.233467	0.909323	15.2681	15.7535	3.90744
CREB/ATF/3	opp	-25.5	12	14.6626	15.1376	3.89071	0.2965	0.52506	-0.684356	1.04534	14.0267	14.4811	3.74522
CREB/ATF/3	same	-25.5	13	12.6993	13.1238	3.62268	0.393938	0.52506	0.082999	0.909323	13.9657	14.4325	3.73707
CREB/ATF/3	same	-24.5	15	14.8517	15.2851	3.90961	0.416725	0.52506	0.0379271	0.909323	16.3327	16.8093	4.04138
CREB/ATF/3	opp	-24.5	14	14.553	15.0366	3.8777	0.512029	0.566227	-0.142622	1.04534	13.9219	14.3844	3.7312
CREB/ATF/3	same	-23.5	11	14.5129	14.9812	3.87056	0.219159	0.509476	-0.907604	0.909323	15.9602	16.4751	3.99502
CREB/ATF/3	opp	-23.5	17	15.8048	16.2847	4.03543	0.32255	0.52506	0.296169	1.04534	15.1194	15.5784	3.88836
CREB/ATF/3	same	-22.5	8	13.7601	14.2987	3.78136	0.069742	0.420899	-1.52329	0.909323	15.1322	15.7245	3.89002
CREB/ATF/3	opp	-22.5	19	15.0628	15.5239	3.94004	0.128312	0.439188	0.999278	1.04534	14.4095	14.8506	3.79599
CREB/ATF/3	same	-21.5	17	12.7526	13.1293	3.62344	0.0964536	0.439188	1.1722	0.909323	14.0243	14.4385	3.7449
CREB/ATF/3	opp	-21.5	13	14.9957	15.5198	3.93952	0.363624	0.52506	-0.506597	1.04534	14.3454	14.8467	3.78753
CREB/ATF/3	opp	-20.5	12	14.998	15.4412	3.92953	0.267775	0.52506	-0.762946	1.04534	14.3475	14.7715	3.78782
CREB/ATF/3	same	-20.5	12	13.5883	14.0025	3.74199	0.400119	0.52506	-0.424453	0.909323	14.9433	15.3988	3.86566
CREB/ATF/3	opp	-19.5	15	14.9603	15.398	3.92403	0.427848	0.527924	0.0101067	1.04534	14.3115	14.7302	3.78305
CREB/ATF/3	same	-19.5	13	13.3314	13.7321	3.70569	0.53666	0.568989	-0.089433	0.909323	14.6608	15.1015	3.82894
CREB/ATF/3	opp	-18.5	8	14.9569	15.4448	3.92999	0.038293	0.354714	-1.77021	1.04534	14.3082	14.775	3.78262
CREB/ATF/3	same	-18.5	10	12.9989	13.463	3.66919	0.251773	0.521318	-0.81733	0.909323	14.2952	14.8055	3.7809
CREB/ATF/3	same	-17.5	16	13.4314	13.8519	3.72181	0.197022	0.509476	0.690134	0.909323	14.7708	15.2332	3.84328
CREB/ATF/3	opp	-17.5	15	13.8042	14.2631	3.77665	0.311413	0.52506	0.316635	1.04534	13.2055	13.6445	3.63393
CREB/ATF/3	same	-16.5	13	11.1878	11.5334	3.39608	0.236383	0.515292	0.533629	0.909323	12.3034	12.6834	3.50762
CREB/ATF/3	opp	-16.5	14	14.8536	15.3482	3.91767	0.480719	0.549729	-0.217888	1.04534	14.2094	14.6825	3.76954
CREB/ATF/3	same	-15.5	6	11.2821	11.6347	3.41097	0.0677426	0.420899	-1.54855	0.909323	12.4071	12.7949	3.52237
CREB/ATF/3	opp	-15.5	14	15.3633	15.927	3.99086	0.428938	0.527924	-0.341598	1.04534	14.6969	15.2362	3.83366
CREB/ATF/3	opp	-14.5	16	13.8418	14.2645	3.77684	0.23055	0.515292	0.571422	1.04534	13.2415	13.6458	3.63889
CREB/ATF/3	same	-14.5	16	14.8787	15.3717	3.92067	0.324278	0.52506	0.285994	0.909323	16.3624	16.9045	4.04505
CREB/ATF/3	opp	-13.5	14	14.5048	14.9982	3.87275	0.51709	0.566227	-0.130352	1.04534	13.8757	14.3477	3.72501
CREB/ATF/3	same	-13.5	14	14.4955	14.9536	3.86699	0.518069	0.566227	-0.128137	0.909323	15.941	16.4448	3.99262
CREB/ATF/3	opp	-12.5	23	14.62	15.1076	3.88685	0.0149071	0.279116	2.156	1.04534	13.9859	14.4524	3.73977
CREB/ATF/3	same	-12.5	12	11.8926	12.197	3.49241	0.411754	0.52506	0.0307519	0.909323	13.0785	13.4132	3.61642
CREB/ATF/3	same	-11.5	9	12.3396	12.7534	3.57119	0.213981	0.509476	-0.935152	0.909323	13.5701	14.0251	3.68376
CREB/ATF/3	opp	-11.5	17	15.8104	16.3662	4.04551	0.323064	0.52506	0.29405	1.04534	15.1247	15.6563	3.88905
CREB/ATF/3	same	-10.5	26	12.6963	13.1596	3.62761	0.000317535	0.0558861	3.66734	0.909323	13.9624	14.4718	3.73663
CREB/ATF/3	opp	-10.5	15	17.8702	18.4034	4.28991	0.296961	0.52506	-0.669061	1.04534	17.0952	17.6052	4.13463
CREB/ATF/3	opp	-9.5	11	15.9447	16.409	4.0508	0.12976	0.439188	-1.22067	1.04534	15.2531	15.6973	3.90553
CREB/ATF/3	same	-9.5	14	11.0374	11.4124	3.37822	0.14869	0.458258	0.876972	0.909323	12.138	12.5504	3.48397
CREB/ATF/3	opp	-8.5	11	17.1112	17.7472	4.21275	0.0807937	0.420899	-1.45064	1.04534	16.3691	16.9775	4.04587
CREB/ATF/3	same	-8.5	11	10.711	11.023	3.32009	0.386272	0.52506	0.0870585	0.909323	11.779	12.1222	3.43206
CREB/ATF/3	same	-7.5	15	11.2419	11.6564	3.41415	0.106077	0.439188	1.10075	0.909323	12.3629	12.8188	3.51609
CREB/ATF/3	opp	-7.5	23	20.6461	21.3636	4.62208	0.257699	0.52506	0.509276	1.04534	19.7506	20.437	4.44417
CREB/ATF/3	same	-6.5	4	8.77888	8.99769	2.99962	0.0628978	0.420899	-1.59316	0.909323	9.6543	9.89493	3.10714
CREB/ATF/3	opp	-6.5	20	21.7593	22.4232	4.73531	0.406581	0.52506	-0.371535	1.04534	20.8156	21.4507	4.56241
CREB/ATF/3	opp	-5.5	26	19.2686	19.858	4.45623	0.0554881	0.406913	1.51056	1.04534	18.4329	18.9967	4.29336
CREB/ATF/3	same	-5.5	7	7.52359	7.79366	2.79171	0.521186	0.566227	-0.18755	0.909323	8.27383	8.57084	2.87643
CREB/ATF/3	same	-4.5	4	6.61527	6.74681	2.59746	0.211066	0.509476	-1.00685	0.909323	7.27494	7.41959	2.69721
CREB/ATF/3	opp	-4.5	23	24.7236	25.52	5.05174	0.415203	0.52506	-0.341185	1.04534	23.6513	24.4132	4.86326
CREB/ATF/3	same	-3.5	14	7.42387	7.49617	2.73791	0.00942781	0.276549	2.40188	0.909323	8.16417	8.24368	2.8573
CREB/ATF/3	opp	-3.5	0	0.0727353	0.0729319	0.270059	0.929847	0.940535	-0.269331	1.04534	0.0695807	0.0697688	0.263781
CREB/ATF/3	same	-2.5	3	1.85902	1.95444	1.39801	0.118374	0.439188	0.816147	0.909323	2.0444	2.14934	1.42982
CREB/ATF/3	opp	-2.5	0	0.161062	0.1594	0.399249	0.851239	0.866	-0.403413	1.04534	0.154077	0.152486	0.392526
CREB/ATF/3	opp	-1.5	42	63.253	66.1863	8.1355	0.00294599	0.172832	-2.61238	1.04534	60.5097	63.3158	7.7788
CREB/ATF/3	same	-1.5	0	0	0	0	1	1	0	0.909323	0	0	0
CREB/ATF/3	same	-0.5	2	1.09716	1.18699	1.08949	0.0990133	0.439188	0.828676	0.909323	1.20657	1.30536	1.09844
CREB/ATF/3	opp	-0.5	2	5.08233	5.11902	2.26252	0.117887	0.439188	-1.36234	1.04534	4.8619	4.897	2.20497
CREB/ATF/3	opp	0.5	6	3.69432	3.75107	1.93677	0.08131	0.420899	1.19048	0.981611	3.64521	3.7012	1.90924
CREB/ATF/3	same	0.5	0	0.244162	0.251352	0.50135	0.783361	0.801578	-0.487009	0.90813	0.268686	0.276598	0.518349
CREB/ATF/3	opp	1.5	23	26.3427	28.7843	5.3651	0.297696	0.52506	-0.623037	0.981611	26.8361	29.3235	5.18036
CREB/ATF/3	same	1.5	0	0.489916	0.506331	0.71157	0.612678	0.634302	-0.6885	0.90813	0.539477	0.557554	0.734491
CREB/ATF/3	opp	2.5	12	17.2149	17.5464	4.18885	0.124539	0.439188	-1.24496	0.981611	17.5374	17.8751	4.18777
CREB/ATF/3	same	2.5	4	3.90093	3.9656	1.99138	0.351815	0.52506	0.0497516	0.90813	4.29556	4.36677	2.07257
CREB/ATF/3	opp	3.5	49	44.1622	45.363	6.73521	0.20826	0.509476	0.718291	0.981611	44.9895	46.2128	6.70742
CREB/ATF/3	same	3.5	0	0	0	0	1	1	0	0.90813	0	0	0
CREB/ATF/3	opp	4.5	8	10.5543	10.8741	3.29759	0.27397	0.52506	-0.774597	0.981611	10.752	11.0778	3.27903
CREB/ATF/3	same	4.5	0	0.378856	0.384715	0.620254	0.684645	0.704663	-0.610807	0.90813	0.417182	0.423634	0.645896
CREB/ATF/3	opp	5.5	8	9.80921	10.628	3.26006	0.354707	0.52506	-0.554961	0.981611	9.99297	10.8271	3.16117
CREB/ATF/3	same	5.5	16	16.9333	17.5166	4.18528	0.474176	0.549729	-0.222988	0.90813	18.6463	19.2886	4.31814
CREB/ATF/3	same	6.5	9	13.081	13.5408	3.67979	0.160525	0.477788	-1.10904	0.90813	14.4044	14.9107	3.79531
CREB/ATF/3	opp	6.5	15	14.8095	15.2921	3.91051	0.412408	0.52506	0.0487063	0.981611	15.087	15.5786	3.88419
CREB/ATF/3	same	7.5	18	16.1145	16.6392	4.07912	0.267224	0.52506	0.462226	0.90813	17.7447	18.3225	4.21245
CREB/ATF/3	opp	7.5	10	10.7978	11.0628	3.32607	0.484241	0.549729	-0.239852	0.981611	11	11.27	3.31663
CREB/ATF/3	opp	8.5	10	14.0049	14.4685	3.80375	0.175354	0.489723	-1.05289	0.981611	14.2673	14.7395	3.77721
CREB/ATF/3	same	8.5	12	13.1828	13.596	3.68727	0.443151	0.530576	-0.320791	0.90813	14.5165	14.9714	3.81005
CREB/ATF/3	same	9.5	20	13.0838	13.534	3.67885	0.0265258	0.333468	1.87998	0.90813	14.4074	14.9031	3.79571
CREB/ATF/3	opp	9.5	13	15.743	16.3016	4.03752	0.295926	0.52506	-0.679383	0.981611	16.0379	16.6069	4.00474
CREB/ATF/3	opp	10.5	10	14.8749	15.3919	3.92325	0.124672	0.439188	-1.24257	0.981611	15.1536	15.6802	3.89276
CREB/ATF/3	same	10.5	12	11.9158	12.2778	3.50397	0.414409	0.52506	0.0240225	0.90813	13.1213	13.5199	3.62233
CREB/ATF/3	same	11.5	16	11.9992	12.3937	3.52047	0.101245	0.439188	1.13645	0.90813	13.213	13.6475	3.63497
CREB/ATF/3	opp	11.5	19	14.8305	15.3892	3.92291	0.115549	0.439188	1.06285	0.981611	15.1084	15.6775	3.88695
CREB/ATF/3	same	12.5	11	14.4756	15.0117	3.8745	0.221974	0.509476	-0.897042	0.90813	15.94	16.5303	3.99249
CREB/ATF/3	opp	12.5	14	14.1851	14.6835	3.8319	0.550822	0.576145	-0.0483139	0.981611	14.4509	14.9585	3.80143
CREB/ATF/3	same	13.5	18	12.5541	12.9887	3.60399	0.0536217	0.406913	1.51107	0.90813	13.8242	14.3027	3.71808
CREB/ATF/3	opp	13.5	11	14.6158	15.1214	3.88862	0.211533	0.509476	-0.929852	0.981611	14.8896	15.4047	3.85871
CREB/ATF/3	same	14.5	6	12.4496	12.9265	3.59535	0.0355755	0.354714	-1.79388	0.90813	13.7091	14.2342	3.70257
CREB/ATF/3	opp	14.5	15	14.8003	15.324	3.91459	0.411467	0.52506	0.0510044	0.981611	15.0776	15.6111	3.88299
CREB/ATF/3	same	15.5	22	14.5093	14.9513	3.8667	0.0238471	0.327018	1.93724	0.90813	15.9771	16.4639	3.99713
CREB/ATF/3	opp	15.5	13	13.5625	13.9851	3.73966	0.511444	0.566227	-0.150425	0.981611	13.8166	14.247	3.71707
CREB/ATF/3	same	16.5	18	14.432	14.9617	3.86803	0.142777	0.448727	0.922426	0.90813	15.892	16.4753	3.98648
CREB/ATF/3	opp	16.5	13	12.881	13.26	3.64143	0.413873	0.52506	0.0326855	0.981611	13.1223	13.5084	3.62247
CREB/ATF/3	opp	17.5	11	13.253	13.7028	3.70173	0.328	0.52506	-0.608633	0.981611	13.5013	13.9595	3.67441
CREB/ATF/3	same	17.5	14	13.9161	14.3259	3.78496	0.420675	0.525098	0.0221581	0.90813	15.3239	15.7752	3.91458
CREB/ATF/3	same	18.5	6	11.8021	12.2155	3.49507	0.0511225	0.406913	-1.66007	0.90813	12.996	13.4512	3.605
CREB/ATF/3	opp	18.5	16	14.4527	14.9761	3.8699	0.284453	0.52506	0.399818	0.981611	14.7235	15.2567	3.83712
CREB/ATF/3	opp	19.5	17	13.6835	14.1188	3.7575	0.151017	0.458258	0.882637	0.981611	13.9398	14.3833	3.73361
CREB/ATF/3	same	19.5	12	12.3744	12.777	3.5745	0.533223	0.568989	-0.104755	0.90813	13.6263	14.0696	3.69138
CREB/ATF/3	opp	20.5	20	14.023	14.5036	3.80836	0.048569	0.406913	1.56945	0.981611	14.2857	14.7753	3.77964
CREB/ATF/3	same	20.5	8	13.003	13.3953	3.65995	0.0996217	0.439188	-1.36695	0.90813	14.3184	14.7504	3.78397
CREB/ATF/3	same	21.5	18	15.4717	15.9911	3.99888	0.215358	0.509476	0.632239	0.90813	17.0369	17.6088	4.12758
CREB/ATF/3	opp	21.5	16	14.8001	15.2578	3.90613	0.316814	0.52506	0.30719	0.981611	15.0773	15.5437	3.88295
CREB/ATF/3	opp	22.5	16	15.0273	15.4891	3.93561	0.338504	0.52506	0.247146	0.981611	15.3088	15.7792	3.91265
CREB/ATF/3	same	22.5	13	14.5709	15.0508	3.87954	0.405359	0.52506	-0.404928	0.90813	16.045	16.5734	4.00562
CREB/ATF/3	same	23.5	11	12.8023	13.2989	3.64676	0.37353	0.52506	-0.494213	0.90813	14.0974	14.6442	3.75465
CREB/ATF/3	opp	23.5	14	15.7533	16.2945	4.03665	0.390815	0.52506	-0.434355	0.981611	16.0485	16.5998	4.00605
CREB/ATF/3	opp	24.5	11	15.2567	15.7973	3.97458	0.168312	0.477788	-1.07099	0.981611	15.5425	16.0932	3.9424
CREB/ATF/3	same	24.5	15	13.7238	14.1836	3.76611	0.303613	0.52506	0.338861	0.90813	15.1122	15.6184	3.88744
CREB/ATF/3	opp	25.5	13	14.7371	15.2222	3.90156	0.388778	0.52506	-0.44524	0.981611	15.0132	15.5074	3.87469
CREB/ATF/3	same	25.5	12	13.1379	13.5582	3.68215	0.44803	0.532793	-0.309024	0.90813	14.4669	14.9298	3.80354
CREB/ATF/3	same	26.5	22	13.6861	14.0759	3.75179	0.0132319	0.279116	2.21599	0.90813	15.0706	15.4999	3.88209
CREB/ATF/3	opp	26.5	13	14.7051	15.2748	3.9083	0.391953	0.52506	-0.436266	0.981611	14.9805	15.561	3.87047
CREB/ATF/3	same	27.5	19	12.4785	12.8261	3.58136	0.0301393	0.339095	1.82096	0.90813	13.7409	14.1236	3.70687
CREB/ATF/3	opp	27.5	15	15.8277	16.344	4.04277	0.483931	0.549729	-0.204728	0.981611	16.1242	16.6502	4.01549
CREB/ATF/3	opp	28.5	23	15.3241	15.8204	3.97749	0.0241547	0.327018	1.92983	0.981611	15.6112	16.1168	3.9511
CREB/ATF/3	same	28.5	7	12.3377	12.6911	3.56246	0.0757545	0.420899	-1.49833	0.90813	13.5859	13.975	3.6859
CREB/ATF/3	same	29.5	14	12.7398	13.1427	3.62528	0.298599	0.52506	0.347601	0.90813	14.0287	14.4722	3.74548
CREB/ATF/3	opp	29.5	14	14.3406	14.8196	3.84963	0.534391	0.568989	-0.0884647	0.981611	14.6092	15.0973	3.8222
CREB/ATF/3	opp	30.5	12	15.0765	15.5643	3.94516	0.261318	0.52506	-0.779827	0.981611	15.359	15.8558	3.91905
CREB/ATF/3	same	30.5	10	11.9584	12.3657	3.5165	0.351601	0.52506	-0.55693	0.90813	13.1682	13.6167	3.6288
CREB/ATF/3	opp	31.5	9	13.6638	14.0935	3.75413	0.126297	0.439188	-1.24231	0.981611	13.9197	14.3575	3.73092
CREB/ATF/3	same	31.5	11	13.1022	13.5371	3.67929	0.342874	0.52506	-0.571366	0.90813	14.4277	14.9066	3.79838
CREB/ATF/3	opp	32.5	15	14.4154	14.9272	3.86357	0.372253	0.52506	0.151322	0.981611	14.6854	15.2068	3.83215
CREB/ATF/3	same	32.5	13	13.1803	13.6136	3.68966	0.55323	0.576145	-0.0488674	0.90813	14.5137	14.9908	3.80968
CREB/ATF/3	same	33.5	9	12.7029	13.1591	3.62755	0.186348	0.504573	-1.02076	0.90813	13.9879	14.4904	3.74004
CREB/ATF/3	opp	33.5	19	16.6043	17.1803	4.14491	0.232274	0.515292	0.577988	0.981611	16.9153	17.5021	4.11283
CREB/ATF/3	opp	34.5	15	16.0683	16.5166	4.06406	0.459984	0.543337	-0.262863	0.981611	16.3693	16.826	4.0459
CREB/ATF/3	same	34.5	12	12.2404	12.7353	3.56866	0.548498	0.576145	-0.0673514	0.90813	13.4786	14.0237	3.67133
CREB/ATF/3	opp	35.5	21	16.6956	17.2788	4.15678	0.122104	0.439188	1.03552	0.981611	17.0083	17.6025	4.12412
CREB/ATF/3	same	35.5	15	11.8153	12.2564	3.50092	0.142524	0.448727	0.909682	0.90813	13.0106	13.4963	3.60701
CREB/ATF/3	opp	36.5	22	13.9992	14.4859	3.80603	0.0167023	0.279116	2.10214	0.981611	14.2614	14.7572	3.77643
CREB/ATF/3	same	36.5	15	12.5938	12.9953	3.6049	0.201641	0.509476	0.667475	0.90813	13.8679	14.3099	3.72396
CREB/ATF/3	same	37.5	13	13.7863	14.2582	3.77601	0.48726	0.549729	-0.208235	0.90813	15.181	15.7006	3.89628
CREB/ATF/3	opp	37.5	12	12.7044	13.1544	3.6269	0.495939	0.555957	-0.19422	0.981611	12.9424	13.4008	3.59756
CREB/ATF/3	same	38.5	18	12.6926	13.0612	3.61402	0.058341	0.410721	1.46856	0.90813	13.9766	14.3825	3.73853
CREB/ATF/3	opp	38.5	15	13.0086	13.4887	3.67269	0.237151	0.515292	0.542228	0.981611	13.2523	13.7414	3.64037
CREB/ATF/3	opp	39.5	20	13.7363	14.169	3.76417	0.0407868	0.358924	1.66402	0.981611	13.9937	14.4344	3.74081
CREB/ATF/3	same	39.5	7	12.6299	13.1459	3.62573	0.0653741	0.420899	-1.55277	0.90813	13.9076	14.4758	3.72929
CREB/ATF/3	opp	40.5	8	16.4205	16.8474	4.10455	0.0174447	0.279116	-2.05151	0.981611	16.7281	17.163	4.09001
CREB/ATF/3	same	40.5	17	13.4848	13.9691	3.73753	0.138163	0.448727	0.940504	0.90813	14.849	15.3823	3.85344
CREB/ATF/3	opp	41.5	16	15.6712	16.2952	4.03673	0.401453	0.52506	0.0814491	0.981611	15.9648	16.6005	3.9956
CREB/ATF/3	same	41.5	12	12.9793	13.4297	3.66465	0.465379	0.546045	-0.267237	0.90813	14.2924	14.7883	3.78052
CREB/ATF/3	same	42.5	18	13.3971	13.8447	3.72085	0.0868195	0.436578	1.23705	0.90813	14.7524	15.2453	3.84089
CREB/ATF/3	opp	42.5	16	13.1849	13.5502	3.68106	0.178081	0.489723	0.764744	0.981611	13.4319	13.804	3.66496
CREB/ATF/3	same	43.5	16	14.0604	14.481	3.80539	0.249335	0.521318	0.509692	0.90813	15.4828	15.9459	3.93482
CREB/ATF/3	opp	43.5	14	13.6473	14.1544	3.76224	0.392233	0.52506	0.0937561	0.981611	13.9029	14.4196	3.72866
CREB/ATF/3	opp	44.5	19	13.9412	14.376	3.79156	0.0741293	0.420899	1.33422	0.981611	14.2024	14.6453	3.76861
CREB/ATF/3	same	44.5	14	13.5916	14.0567	3.74922	0.386367	0.52506	0.108922	0.90813	14.9666	15.4787	3.86867
CREB3/XBP1	same	-42.5	24	26.8702	27.7378	5.26667	0.333082	0.457843	-0.544967	0.959308	28.0099	28.9144	5.29244
CREB3/XBP1	opp	-42.5	26	26.4284	27.3197	5.22682	0.518535	0.536836	-0.0819556	0.883628	29.9089	30.9176	5.46891
CREB3/XBP1	same	-41.5	17	27.6423	28.5619	5.34433	0.0208938	0.400759	-1.99133	0.959308	28.8149	29.7734	5.36795
CREB3/XBP1	opp	-41.5	28	26.3642	27.2585	5.22097	0.32899	0.456408	0.313322	0.883628	29.8363	30.8484	5.46226
CREB3/XBP1	same	-40.5	20	27.8291	28.7577	5.36262	0.0771087	0.400759	-1.45993	0.959308	29.0095	29.9775	5.38605
CREB3/XBP1	opp	-40.5	22	26.3631	27.421	5.23651	0.230105	0.456316	-0.833215	0.883628	29.8351	31.0323	5.46215
CREB3/XBP1	opp	-39.5	28	25.5343	26.3609	5.13429	0.271404	0.456408	0.48025	0.883628	28.8971	29.8326	5.3756
CREB3/XBP1	same	-39.5	26	27.565	28.5674	5.34485	0.431684	0.480863	-0.292813	0.959308	28.7343	29.7792	5.36044
CREB3/XBP1	same	-38.5	21	26.6224	27.5998	5.25355	0.160147	0.445078	-1.07022	0.959308	27.7517	28.7705	5.26799
CREB3/XBP1	opp	-38.5	26	28.577	29.5952	5.44015	0.358797	0.460937	-0.473696	0.883628	32.3405	33.4929	5.68687
CREB3/XBP1	opp	-37.5	30	26.8417	27.6674	5.25998	0.234984	0.456316	0.600448	0.883628	30.3767	31.3111	5.5115
CREB3/XBP1	same	-37.5	25	26.269	27.2112	5.21643	0.453053	0.493419	-0.243271	0.959308	27.3833	28.3654	5.2329
CREB3/XBP1	opp	-36.5	28	25.9047	26.7241	5.16954	0.296637	0.456408	0.405323	0.883628	29.3163	30.2436	5.41445
CREB3/XBP1	same	-36.5	24	26.1181	27.0159	5.19768	0.387111	0.463594	-0.40751	0.959308	27.226	28.1619	5.21785
CREB3/XBP1	same	-35.5	31	26.2177	27.1851	5.21393	0.151209	0.443546	0.917206	0.959308	27.3298	28.3382	5.2278
CREB3/XBP1	opp	-35.5	29	25.7591	26.607	5.1582	0.225889	0.456316	0.628306	0.883628	29.1515	30.1111	5.39921
CREB3/XBP1	opp	-34.5	34	27.2081	28.1814	5.30862	0.0849741	0.400759	1.27941	0.883628	30.7913	31.8929	5.549
CREB3/XBP1	same	-34.5	20	25.7671	26.754	5.17243	0.148681	0.443522	-1.11497	0.959308	26.8601	27.8889	5.18267
CREB3/XBP1	opp	-33.5	33	26.5933	27.4982	5.24387	0.0937488	0.400759	1.22176	0.883628	30.0956	31.1196	5.48594
CREB3/XBP1	same	-33.5	27	24.6082	25.5683	5.05651	0.272536	0.456408	0.473011	0.959308	25.652	26.6528	5.06478
CREB3/XBP1	same	-32.5	30	25.5265	26.3459	5.13282	0.161846	0.445078	0.871556	0.959308	26.6092	27.4634	5.15841
CREB3/XBP1	opp	-32.5	22	25.9281	26.8752	5.18413	0.256147	0.456408	-0.757707	0.883628	29.3427	30.4146	5.41689
CREB3/XBP1	opp	-31.5	29	26.1247	27.0626	5.20217	0.24859	0.456316	0.552711	0.883628	29.5653	30.6267	5.4374
CREB3/XBP1	same	-31.5	24	26.3859	27.2165	5.21694	0.36744	0.461785	-0.457333	0.959308	27.5051	28.371	5.24453
CREB3/XBP1	same	-30.5	22	26.5277	27.3554	5.23024	0.220727	0.456316	-0.865672	0.959308	27.6529	28.5158	5.2586
CREB3/XBP1	opp	-30.5	24	26.1684	27.0072	5.19684	0.383381	0.463594	-0.417254	0.883628	29.6147	30.564	5.44194
CREB3/XBP1	opp	-29.5	41	26.4854	27.4471	5.239	0.00324594	0.400759	2.77049	0.883628	29.9735	31.0619	5.4748
CREB3/XBP1	same	-29.5	34	28.1393	29.1565	5.39968	0.117389	0.405262	1.08539	0.959308	29.3329	30.3933	5.41598
CREB3/XBP1	same	-28.5	29	27.2425	28.2083	5.31114	0.323344	0.456408	0.330903	0.959308	28.3981	29.4048	5.32899
CREB3/XBP1	opp	-28.5	25	25.2585	26.223	5.12084	0.53237	0.542865	-0.0504894	0.883628	28.5851	29.6765	5.3465
CREB3/XBP1	same	-27.5	18	25.9223	26.8215	5.17895	0.0664801	0.400759	-1.5297	0.959308	27.0218	27.9593	5.19825
CREB3/XBP1	opp	-27.5	26	26.2346	27.2576	5.22089	0.533612	0.542865	-0.0449413	0.883628	29.6897	30.8474	5.44882
CREB3/XBP1	same	-26.5	32	26.1587	27.0423	5.20022	0.110151	0.403885	1.12327	0.959308	27.2683	28.1894	5.22191
CREB3/XBP1	opp	-26.5	23	26.0571	27.1788	5.21333	0.316999	0.456408	-0.586399	0.883628	29.4888	30.7582	5.43036
CREB3/XBP1	same	-25.5	18	25.9776	26.967	5.19298	0.0651588	0.400759	-1.53622	0.959308	27.0795	28.1109	5.20379
CREB3/XBP1	opp	-25.5	24	24.947	25.8018	5.07955	0.477614	0.506386	-0.186442	0.883628	28.2325	29.1999	5.31343
CREB3/XBP1	same	-24.5	30	27.1093	28.0756	5.29864	0.251492	0.456316	0.545549	0.959308	28.2592	29.2665	5.31594
CREB3/XBP1	opp	-24.5	28	25.7738	26.6738	5.16467	0.287625	0.456408	0.431052	0.883628	29.1681	30.1867	5.40075
CREB3/XBP1	opp	-23.5	24	25.8399	26.7974	5.17662	0.408002	0.475552	-0.355431	0.883628	29.243	30.3266	5.40768
CREB3/XBP1	same	-23.5	27	27.2692	28.2435	5.31446	0.530349	0.542865	-0.0506509	0.959308	28.4259	29.4415	5.33159
CREB3/XBP1	opp	-22.5	32	26.0754	26.8969	5.18622	0.106988	0.400759	1.14238	0.883628	29.5094	30.4391	5.43226
CREB3/XBP1	same	-22.5	22	26.1353	27.093	5.20509	0.243519	0.456316	-0.79447	0.959308	27.2439	28.2422	5.21957
CREB3/XBP1	opp	-21.5	16	26.1151	27.1758	5.21304	0.0236191	0.400759	-1.94035	0.883628	29.5545	30.7548	5.4364
CREB3/XBP1	same	-21.5	25	26.7707	27.8113	5.27364	0.414906	0.477057	-0.335756	0.959308	27.9062	28.991	5.28263
CREB3/XBP1	same	-20.5	32	27.7747	28.7812	5.36481	0.183067	0.456316	0.787597	0.959308	28.9528	30.002	5.38078
CREB3/XBP1	opp	-20.5	23	25.4044	26.2885	5.12723	0.363528	0.461785	-0.468944	0.883628	28.7501	29.7506	5.36191
CREB3/XBP1	same	-19.5	33	26.4111	27.3619	5.23086	0.087717	0.400759	1.25963	0.959308	27.5314	28.5225	5.24703
CREB3/XBP1	opp	-19.5	27	25.0263	25.8524	5.08453	0.301676	0.456408	0.388182	0.883628	28.3222	29.2571	5.32186
CREB3/XBP1	opp	-18.5	30	26.5556	27.5442	5.24825	0.217911	0.456316	0.65629	0.883628	30.053	31.1717	5.48206
CREB3/XBP1	same	-18.5	22	24.4527	25.301	5.03001	0.35719	0.460937	-0.487619	0.959308	25.49	26.3742	5.04876
CREB3/XBP1	same	-17.5	23	25.9384	27.0783	5.20368	0.325219	0.456408	-0.564671	0.959308	27.0386	28.2269	5.19987
CREB3/XBP1	opp	-17.5	27	26.0685	26.9841	5.19463	0.378149	0.462182	0.179314	0.883628	29.5017	30.5379	5.43155
CREB3/XBP1	same	-16.5	35	25.0742	26.1816	5.1168	0.0233157	0.400759	1.93984	0.959308	26.1378	27.2922	5.11252
CREB3/XBP1	opp	-16.5	17	25.8154	26.7287	5.16998	0.0442092	0.400759	-1.70511	0.883628	29.2152	30.2488	5.40511
CREB3/XBP1	opp	-15.5	29	25.1331	25.9682	5.0959	0.189435	0.456316	0.758822	0.883628	28.4431	29.3882	5.33321
CREB3/XBP1	same	-15.5	23	25.2165	26.1713	5.11579	0.377496	0.462182	-0.433262	0.959308	26.2861	27.2815	5.127
CREB3/XBP1	opp	-14.5	22	24.9076	25.7134	5.07084	0.324057	0.456408	-0.573401	0.883628	28.1879	29.0998	5.30923
CREB3/XBP1	same	-14.5	21	22.9365	23.6407	4.86218	0.394426	0.467537	-0.398287	0.959308	23.9095	24.6435	4.88973
CREB3/XBP1	opp	-13.5	26	24.2268	25.0105	5.00105	0.312636	0.456408	0.354575	0.883628	27.4174	28.3044	5.23616
CREB3/XBP1	same	-13.5	25	23.3483	24.1123	4.91043	0.318162	0.456408	0.336359	0.959308	24.3387	25.1351	4.93343
CREB3/XBP1	same	-12.5	29	25.9364	26.794	5.17629	0.236776	0.456316	0.591853	0.959308	27.0366	27.9305	5.19967
CREB3/XBP1	opp	-12.5	25	23.7285	24.5974	4.95958	0.347072	0.46039	0.256373	0.883628	26.8535	27.8368	5.18204
CREB3/XBP1	opp	-11.5	30	22.7857	23.4942	4.84708	0.0583132	0.400759	1.48838	0.883628	25.7865	26.5884	5.07804
CREB3/XBP1	same	-11.5	18	25.4146	26.1952	5.11813	0.0796932	0.400759	-1.4487	0.959308	26.4927	27.3064	5.1471
CREB3/XBP1	same	-10.5	20	25.2121	26.1216	5.11093	0.174715	0.455175	-1.01979	0.959308	26.2815	27.2296	5.12655
CREB3/XBP1	opp	-10.5	22	24.5439	25.3253	5.03242	0.350416	0.46039	-0.505511	0.883628	27.7763	28.6606	5.27033
CREB3/XBP1	same	-9.5	29	24.2379	25.0439	5.00439	0.143176	0.442088	0.95159	0.959308	25.266	26.1062	5.02653
CREB3/XBP1	opp	-9.5	25	24.6852	25.5221	5.05194	0.42206	0.477057	0.0623162	0.883628	27.9362	28.8834	5.28547
CREB3/XBP1	opp	-8.5	33	25.4812	26.4516	5.14311	0.0610336	0.400759	1.46191	0.883628	28.8371	29.9352	5.37001
CREB3/XBP1	same	-8.5	30	24.4756	25.2731	5.02723	0.114133	0.405262	1.09889	0.959308	25.5138	26.3451	5.05112
CREB3/XBP1	same	-7.5	27	22.7207	23.4932	4.84698	0.157627	0.445078	0.882882	0.959308	23.6844	24.4897	4.86667
CREB3/XBP1	opp	-7.5	26	26.165	27.1634	5.21185	0.539037	0.545232	-0.0316622	0.883628	29.6109	30.7408	5.44159
CREB3/XBP1	same	-6.5	17	19.9848	20.7365	4.55373	0.298184	0.456408	-0.655464	0.959308	20.8325	21.6161	4.56427
CREB3/XBP1	opp	-6.5	30	29.3874	30.4146	5.51494	0.407248	0.475552	0.111076	0.883628	33.2577	34.4201	5.76695
CREB3/XBP1	opp	-5.5	30	23.934	24.783	4.97825	0.0934741	0.400759	1.2185	0.883628	27.0861	28.0469	5.20443
CREB3/XBP1	same	-5.5	24	19.2831	19.8708	4.45767	0.119737	0.405262	1.05815	0.959308	20.1011	20.7137	4.48342
CREB3/XBP1	opp	-4.5	25	21.5997	22.1712	4.70864	0.197469	0.456316	0.722131	0.883628	24.4444	25.0912	4.94413
CREB3/XBP1	same	-4.5	17	19.4505	20.1729	4.49143	0.34044	0.46039	-0.545586	0.959308	20.2755	21.0286	4.50283
CREB3/XBP1	same	-3.5	8	12.9155	13.2814	3.64437	0.103686	0.400759	-1.34879	0.959308	13.4633	13.8448	3.66924
CREB3/XBP1	opp	-3.5	39	36.8142	37.8862	6.15518	0.321087	0.456408	0.355119	0.883628	41.6625	42.8758	6.45465
CREB3/XBP1	opp	-2.5	15	7.4977	7.59817	2.75648	0.00459535	0.400759	2.7217	0.883628	8.48514	8.59883	2.91293
CREB3/XBP1	same	-2.5	14	16.9722	17.1945	4.14662	0.283061	0.456408	-0.716777	0.959308	17.6921	17.9238	4.2062
CREB3/XBP1	same	-1.5	12	20.1816	20.6586	4.54518	0.0359256	0.400759	-1.80006	0.959308	21.0376	21.5349	4.58668
CREB3/XBP1	opp	-1.5	11	7.33109	7.48662	2.73617	0.0697451	0.400759	1.34089	0.883628	8.29659	8.4726	2.88038
CREB3/XBP1	same	-0.5	0	1.45448	1.50293	1.22594	0.233521	0.456316	-1.18642	0.959308	1.51618	1.56668	1.23133
CREB3/XBP1	opp	-0.5	37	35.9367	37.1061	6.09148	0.387206	0.463594	0.174551	0.883628	40.6695	41.9929	6.37727
CREB3/XBP1	opp	0.5	5	3.74831	3.8663	1.96629	0.176872	0.455175	0.636573	0.908028	4.18419	4.3159	2.04553
CREB3/XBP1	same	0.5	5	4.42445	4.38172	2.09326	0.284221	0.456408	0.274955	0.799948	5.02991	4.98133	2.24275
CREB3/XBP1	same	1.5	4	1.3705	1.35478	1.16395	0.0131204	0.400759	2.25912	0.799948	1.71323	1.69359	1.3089
CREB3/XBP1	opp	1.5	5	3.42339	3.56009	1.88682	0.13243	0.423775	0.83559	0.908028	3.77014	3.92068	1.94168
CREB3/XBP1	same	2.5	4	1.95508	1.99078	1.41095	0.0486913	0.400759	1.44932	0.799948	2.44401	2.48863	1.56333
CREB3/XBP1	opp	2.5	1	4.04041	4.17445	2.04315	0.0886618	0.400759	-1.4881	0.908028	4.44966	4.59726	2.10942
CREB3/XBP1	opp	3.5	3	1.46272	1.48489	1.21856	0.061051	0.400759	1.26155	0.908028	1.61087	1.63529	1.2692
CREB3/XBP1	same	3.5	7	6.15633	6.24599	2.4992	0.277809	0.456408	0.337575	0.799948	7.69591	7.80799	2.77415
CREB3/XBP1	opp	4.5	39	52.753	54.1311	7.35738	0.0296263	0.400759	-1.86928	0.908028	58.0962	59.6139	7.62208
CREB3/XBP1	same	4.5	3	1.70021	1.76335	1.32791	0.0932216	0.400759	0.978819	0.799948	2.12541	2.20433	1.45788
CREB3/XBP1	same	5.5	11	6.93314	7.10805	2.66609	0.0503868	0.400759	1.5254	0.799948	8.66698	8.88563	2.94397
CREB3/XBP1	opp	5.5	22	24.6005	25.2201	5.02197	0.346251	0.46039	-0.517816	0.908028	27.0922	27.7746	5.20501
CREB3/XBP1	opp	6.5	22	18.5626	19.1238	4.37308	0.178327	0.455175	0.78604	0.908028	20.4427	21.0608	4.52136
CREB3/XBP1	same	6.5	17	14.984	15.3003	3.91156	0.249787	0.456316	0.515397	0.799948	18.7312	19.1266	4.32796
CREB3/XBP1	same	7.5	21	17.5927	18.0773	4.25175	0.173986	0.455175	0.801398	0.799948	21.9922	22.5981	4.68959
CREB3/XBP1	opp	7.5	23	25.2823	25.9756	5.09663	0.372577	0.461785	-0.447804	0.908028	27.8431	28.6066	5.27665
CREB3/XBP1	same	8.5	26	24.1197	25.0575	5.00575	0.304827	0.456408	0.375638	0.799948	30.1515	31.3239	5.49104
CREB3/XBP1	opp	8.5	27	25.1671	26.0553	5.10444	0.311722	0.456408	0.359078	0.908028	27.7162	28.6944	5.26462
CREB3/XBP1	same	9.5	27	21.9295	22.6805	4.7624	0.119351	0.405262	1.06469	0.799948	27.4136	28.3524	5.2358
CREB3/XBP1	opp	9.5	24	27.3041	28.3066	5.32039	0.303759	0.456408	-0.621033	0.908028	30.0697	31.1737	5.48358
CREB3/XBP1	same	10.5	22	19.6186	20.4334	4.52033	0.250642	0.456316	0.526829	0.799948	24.5248	25.5433	4.95225
CREB3/XBP1	opp	10.5	28	28.0619	28.9908	5.38431	0.545378	0.548495	-0.0115018	0.908028	30.9042	31.9272	5.55916
CREB3/XBP1	same	11.5	13	19.0097	19.6396	4.43165	0.0980319	0.400759	-1.35609	0.799948	23.7637	24.551	4.8748
CREB3/XBP1	opp	11.5	32	27.2669	28.1244	5.30325	0.157803	0.445078	0.892499	0.908028	30.0286	30.9731	5.47984
CREB3/XBP1	same	12.5	25	18.4522	18.9622	4.35456	0.0562702	0.400759	1.50367	0.799948	23.0667	23.7042	4.80278
CREB3/XBP1	opp	12.5	22	26.9699	27.9519	5.28696	0.19681	0.456316	-0.940028	0.908028	29.7016	30.7831	5.44992
CREB3/XBP1	opp	13.5	31	28.0199	28.9783	5.38315	0.249689	0.456316	0.553592	0.908028	30.858	31.9134	5.555
CREB3/XBP1	same	13.5	17	19.5871	20.2589	4.50099	0.32934	0.456408	-0.574789	0.799948	24.4855	25.3253	4.94828
CREB3/XBP1	opp	14.5	24	26.6214	27.382	5.23278	0.350524	0.46039	-0.500961	0.908028	29.3178	30.1555	5.41459
CREB3/XBP1	same	14.5	18	19.5874	20.2605	4.50117	0.416922	0.477057	-0.352672	0.799948	24.4859	25.3273	4.94832
CREB3/XBP1	same	15.5	27	19.333	19.9945	4.47152	0.0374398	0.400759	1.71463	0.799948	24.1678	24.9947	4.91608
CREB3/XBP1	opp	15.5	30	26.3926	27.4396	5.23828	0.208456	0.456316	0.688663	0.908028	29.0658	30.2189	5.39127
CREB3/XBP1	same	16.5	26	19.9645	20.7464	4.55483	0.0766742	0.400759	1.32509	0.799948	24.9572	25.9347	4.99572
CREB3/XBP1	opp	16.5	23	25.3671	26.1437	5.11309	0.36628	0.461785	-0.46295	0.908028	27.9365	28.7917	5.2855
CREB3/XBP1	same	17.5	15	21.1042	21.7327	4.66183	0.107021	0.400759	-1.30939	0.799948	26.3819	27.1676	5.13633
CREB3/XBP1	opp	17.5	28	25.4241	26.3329	5.13156	0.264067	0.456408	0.501969	0.908028	27.9993	29	5.29143
CREB3/XBP1	opp	18.5	27	25.9676	27.0242	5.19848	0.370562	0.461785	0.198602	0.908028	28.5978	29.7614	5.34769
CREB3/XBP1	same	18.5	20	21.1947	21.8546	4.67489	0.45417	0.493419	-0.255568	0.799948	26.4951	27.32	5.14734
CREB3/XBP1	opp	19.5	20	27.1722	28.3594	5.32536	0.0959532	0.400759	-1.34681	0.908028	29.9244	31.2319	5.47032
CREB3/XBP1	same	19.5	18	21.0281	21.7485	4.66353	0.299588	0.456408	-0.649305	0.799948	26.2868	27.1874	5.12706
CREB3/XBP1	same	20.5	16	21.3164	22.0364	4.6943	0.147129	0.443522	-1.13252	0.799948	26.6472	27.5473	5.16209
CREB3/XBP1	opp	20.5	23	25.791	26.7877	5.17568	0.335578	0.457843	-0.539248	0.908028	28.4033	29.5009	5.32947
CREB3/XBP1	opp	21.5	18	23.9402	24.8038	4.98034	0.13076	0.423775	-1.19272	0.908028	26.365	27.3161	5.13468
CREB3/XBP1	same	21.5	19	21.8824	22.6897	4.76337	0.314742	0.456408	-0.605119	0.799948	27.3548	28.364	5.23018
CREB3/XBP1	opp	22.5	32	24.8579	25.7634	5.07576	0.0674696	0.400759	1.40711	0.908028	27.3756	28.3729	5.23217
CREB3/XBP1	same	22.5	20	21.5639	22.2377	4.71568	0.422846	0.477057	-0.331628	0.799948	26.9566	27.7989	5.19197
CREB3/XBP1	same	23.5	29	21.3	22.0123	4.69172	0.0434367	0.400759	1.64118	0.799948	26.6268	27.5171	5.16011
CREB3/XBP1	opp	23.5	22	26.9763	27.841	5.27646	0.196479	0.456316	-0.943107	0.908028	29.7086	30.6609	5.45056
CREB3/XBP1	opp	24.5	37	28.1711	29.2167	5.40524	0.0443823	0.400759	1.63339	0.908028	31.0245	32.1759	5.56996
CREB3/XBP1	same	24.5	22	22.0578	22.9843	4.79419	0.551474	0.551474	-0.0120663	0.799948	27.5741	28.7322	5.2511
CREB3/XBP1	opp	25.5	35	27.6842	28.6446	5.35206	0.0730945	0.400759	1.36691	0.908028	30.4883	31.5459	5.52162
CREB3/XBP1	same	25.5	22	21.4343	22.1536	4.70676	0.395813	0.467537	0.120179	0.799948	26.7947	27.6937	5.17636
CREB3/XBP1	opp	26.5	23	27.1396	28.1137	5.30224	0.247534	0.456316	-0.780721	0.908028	29.8885	30.9613	5.46703
CREB3/XBP1	same	26.5	22	20.9506	21.7173	4.66018	0.355462	0.460937	0.225179	0.799948	26.19	27.1483	5.11761
CREB3/XBP1	opp	27.5	29	26.9108	27.8563	5.27791	0.300424	0.456408	0.395843	0.908028	29.6365	30.6778	5.44394
CREB3/XBP1	same	27.5	20	20.5089	21.2558	4.6104	0.513981	0.536836	-0.11038	0.799948	25.6378	26.5715	5.06338
CREB3/XBP1	same	28.5	20	21.4049	22.1283	4.70407	0.436243	0.482885	-0.298658	0.799948	26.7579	27.6621	5.1728
CREB3/XBP1	opp	28.5	26	27.3647	28.3679	5.32615	0.446699	0.491369	-0.256225	0.908028	30.1364	31.2412	5.48966
CREB3/XBP1	opp	29.5	36	27.6988	28.5626	5.3444	0.0521863	0.400759	1.55325	0.908028	30.5044	31.4557	5.52307
CREB3/XBP1	same	29.5	21	21.7865	22.5788	4.75172	0.489817	0.516214	-0.165514	0.799948	27.2348	28.2254	5.2187
CREB3/XBP1	same	30.5	24	20.8704	21.5412	4.64125	0.209358	0.456316	0.674291	0.799948	26.0897	26.9283	5.10781
CREB3/XBP1	opp	30.5	27	28.0317	29.0081	5.38592	0.472479	0.503978	-0.191564	0.908028	30.871	31.9463	5.55617
CREB3/XBP1	opp	31.5	19	29.2846	30.3083	5.5053	0.0291727	0.400759	-1.86813	0.908028	32.2508	33.3781	5.67898
CREB3/XBP1	same	31.5	18	21.3777	22.1193	4.70312	0.274234	0.456408	-0.718181	0.799948	26.7238	27.6509	5.16951
CREB3/XBP1	same	32.5	13	21.2438	22.012	4.69169	0.038981	0.400759	-1.7571	0.799948	26.5564	27.5167	5.15329
CREB3/XBP1	opp	32.5	26	27.1099	27.9984	5.29135	0.466009	0.503176	-0.209757	0.908028	29.8558	30.8343	5.46404
CREB3/XBP1	same	33.5	16	21.6468	22.3867	4.73146	0.131915	0.423775	-1.19346	0.799948	27.0602	27.9852	5.20195
CREB3/XBP1	opp	33.5	22	27.3355	28.2216	5.3124	0.178449	0.455175	-1.00435	0.908028	30.1042	31.0801	5.48673
CREB3/XBP1	same	34.5	12	21.7816	22.4881	4.74217	0.0168343	0.400759	-2.06269	0.799948	27.2288	28.112	5.21812
CREB3/XBP1	opp	34.5	32	28.4221	29.3618	5.41865	0.218194	0.456316	0.660302	0.908028	31.3008	32.3358	5.59472
CREB3/XBP1	same	35.5	28	21.3254	22.0273	4.69333	0.0653544	0.400759	1.42215	0.799948	26.6585	27.5359	5.16318
CREB3/XBP1	opp	35.5	23	28.2622	29.2441	5.40778	0.186621	0.456316	-0.973072	0.908028	31.1247	32.2061	5.57896
CREB3/XBP1	same	36.5	13	21.4783	22.2782	4.71998	0.0351436	0.400759	-1.79625	0.799948	26.8496	27.8496	5.18166
CREB3/XBP1	opp	36.5	26	27.7535	28.6512	5.35268	0.417716	0.477057	-0.327591	0.908028	30.5646	31.5532	5.52852
CREB3/XBP1	same	37.5	17	23.5359	24.3936	4.93899	0.102448	0.400759	-1.32333	0.799948	29.4218	30.494	5.42419
CREB3/XBP1	opp	37.5	23	27.3746	28.3847	5.32773	0.233823	0.456316	-0.821103	0.908028	30.1473	31.2597	5.49066
CREB3/XBP1	opp	38.5	40	27.5902	28.6371	5.35136	0.0100164	0.400759	2.319	0.908028	30.3847	31.5376	5.51223
CREB3/XBP1	same	38.5	24	21.9944	22.7632	4.77108	0.287865	0.456408	0.420366	0.799948	27.4948	28.4558	5.24355
CREB3/XBP1	opp	39.5	36	29.0173	30.1016	5.48649	0.0861488	0.400759	1.27272	0.908028	31.9563	33.1505	5.65299
CREB3/XBP1	same	39.5	23	22.7912	23.5846	4.8564	0.42755	0.479292	0.0429935	0.799948	28.4908	29.4827	5.33768
CREB3/XBP1	opp	40.5	23	27.4353	28.3612	5.32552	0.230366	0.456316	-0.832834	0.908028	30.2141	31.2338	5.49674
CREB3/XBP1	same	40.5	22	23.0142	23.7972	4.87823	0.471087	0.503978	-0.207909	0.799948	28.7696	29.7484	5.36373
CREB3/XBP1	same	41.5	19	23.1792	23.8998	4.88875	0.226613	0.456316	-0.854852	0.799948	28.9758	29.8767	5.38292
CREB3/XBP1	opp	41.5	23	27.1853	28.1646	5.30704	0.244825	0.456316	-0.788639	0.908028	29.9389	31.0174	5.47164
CREB3/XBP1	opp	42.5	32	28.2957	29.1709	5.40101	0.211095	0.456316	0.685846	0.908028	31.1617	32.1256	5.58227
CREB3/XBP1	same	42.5	25	22.8008	23.5949	4.85746	0.277916	0.456408	0.452746	0.799948	28.5028	29.4956	5.33881
CREB3/XBP1	same	43.5	35	23.9454	24.9123	4.99122	0.0127555	0.400759	2.2148	0.799948	29.9337	31.1424	5.47117
CREB3/XBP1	opp	43.5	22	28.1521	29.1963	5.40336	0.141966	0.442088	-1.13857	0.908028	31.0036	32.1536	5.56808
CREB3/XBP1	opp	44.5	25	28.1863	29.0949	5.39397	0.3148	0.456408	-0.590712	0.908028	31.0412	32.0418	5.57146
CREB3/XBP1	same	44.5	24	24.4709	25.3875	5.0386	0.515846	0.536836	-0.0934555	0.799948	30.5906	31.7365	5.53087
CTCF	opp	-47.5	73	71.272	73.615	8.44227	0.388885	0.490538	0.204685	0.859057	82.9654	85.6927	9.10853
CTCF	same	-47.5	83	78.1295	80.78	8.83909	0.267799	0.478206	0.551012	0.963262	81.1094	83.8609	9.00607
CTCF	opp	-46.5	76	69.4404	71.8971	8.33309	0.1968	0.409832	0.787176	0.859057	80.8332	83.693	8.99073
CTCF	same	-46.5	81	77.4403	80.0146	8.80002	0.31697	0.490538	0.404511	0.963262	80.3938	83.0663	8.96626
CTCF	opp	-45.5	62	69.7916	72.101	8.35414	0.192597	0.409832	-0.932668	0.859057	81.2421	83.9304	9.01344
CTCF	same	-45.5	87	77.5589	80.1078	8.80675	0.13041	0.337555	1.07203	0.963262	80.517	83.163	8.97312
CTCF	same	-44.5	78	77.7787	80.4839	8.81922	0.459949	0.499515	0.0250954	0.963262	80.7451	83.5534	8.98583
CTCF	opp	-44.5	67	75.0938	77.6983	8.66567	0.19157	0.409832	-0.934004	0.859057	87.4142	90.446	9.34955
CTCF	same	-43.5	65	76.7369	79.3848	8.75996	0.097387	0.307378	-1.33983	0.963262	79.6636	82.4124	8.92545
CTCF	opp	-43.5	68	73.7769	76.2204	8.58935	0.27351	0.478206	-0.67257	0.859057	85.8813	88.7257	9.26722
CTCF	same	-42.5	82	75.0298	77.5642	8.66197	0.192798	0.409832	0.804695	0.963262	77.8913	80.5225	8.82561
CTCF	opp	-42.5	72	71.2018	73.6858	8.43811	0.43128	0.490538	0.0946004	0.859057	82.8836	85.7752	9.10404
CTCF	opp	-41.5	59	70.9591	73.2936	8.42372	0.0839074	0.292229	-1.41969	0.859057	82.6011	85.3187	9.08852
CTCF	same	-41.5	78	76.8666	79.6743	8.76736	0.418936	0.490538	0.12927	0.963262	79.7983	82.713	8.93299
CTCF	opp	-40.5	61	69.3464	71.7744	8.32745	0.173495	0.393775	-1.00228	0.859057	80.7238	83.5502	8.98464
CTCF	same	-40.5	77	79.0787	81.7416	8.89262	0.436721	0.490538	-0.233752	0.963262	82.0947	84.8592	9.06061
CTCF	same	-39.5	81	80.1358	82.9096	8.95186	0.432287	0.490538	0.0965369	0.963262	83.1921	86.0717	9.12097
CTCF	opp	-39.5	66	70.1472	72.5194	8.37539	0.337531	0.490538	-0.495164	0.859057	81.656	84.4174	9.03637
CTCF	opp	-38.5	66	68.6451	70.9554	8.28524	0.405158	0.490538	-0.319259	0.859057	79.9075	82.5968	8.9391
CTCF	same	-38.5	93	79.2579	82.0108	8.90269	0.0578215	0.238366	1.54359	0.963262	82.2808	85.1387	9.07087
CTCF	same	-37.5	83	78.9087	81.7704	8.88306	0.297856	0.489162	0.460574	0.963262	81.9182	84.889	9.05087
CTCF	opp	-37.5	51	69.9665	72.5096	8.3646	0.0108266	0.0809989	-2.26747	0.859057	81.4456	84.406	9.02472
CTCF	same	-36.5	73	78.3659	81.0961	8.85245	0.295823	0.489162	-0.60615	0.963262	81.3547	84.1891	9.01969
CTCF	opp	-36.5	59	69.3543	71.9263	8.32792	0.116522	0.331515	-1.24333	0.859057	80.7331	83.7271	8.98516
CTCF	same	-35.5	83	77.9571	80.7345	8.82933	0.261333	0.478206	0.571152	0.963262	80.9303	83.8137	8.99613
CTCF	opp	-35.5	76	69.7313	71.9976	8.35053	0.206781	0.419627	0.750696	0.859057	81.1719	83.81	9.00954
CTCF	opp	-34.5	76	71.3107	73.708	8.44457	0.265391	0.478206	0.555303	0.859057	83.0104	85.801	9.11101
CTCF	same	-34.5	82	76.5347	79.0552	8.74841	0.244427	0.457169	0.624722	0.963262	79.4536	82.0703	8.91368
CTCF	opp	-33.5	81	70.4963	72.8337	8.39621	0.0971605	0.307378	1.25101	0.859057	82.0624	84.7833	9.05883
CTCF	same	-33.5	81	74.5913	77.0179	8.63663	0.209813	0.419627	0.742032	0.963262	77.4362	79.9553	8.79978
CTCF	opp	-32.5	79	70.4354	72.9411	8.39258	0.140617	0.341707	1.0205	0.859057	81.9915	84.9083	9.05492
CTCF	same	-32.5	81	76.3271	78.7937	8.73654	0.272758	0.478206	0.534873	0.963262	79.2381	81.7988	8.90158
CTCF	opp	-31.5	72	69.0726	71.337	8.31099	0.333972	0.490538	0.352228	0.859057	80.4052	83.041	8.96689
CTCF	same	-31.5	88	75.7968	78.6069	8.70613	0.0749859	0.270485	1.40168	0.963262	78.6876	81.6049	8.8706
CTCF	opp	-30.5	74	69.8679	72.152	8.3587	0.285032	0.478206	0.494344	0.859057	81.3309	83.9897	9.01837
CTCF	same	-30.5	72	74.8654	77.4363	8.65248	0.399191	0.490538	-0.331166	0.963262	77.7207	80.3896	8.81594
CTCF	opp	-29.5	67	70.4984	72.9477	8.39634	0.367055	0.490538	-0.416663	0.859057	82.0649	84.916	9.05897
CTCF	same	-29.5	88	74.2001	76.7968	8.61395	0.0516097	0.226634	1.60205	0.963262	77.03	79.7257	8.77667
CTCF	same	-28.5	78	74.3545	76.7641	8.62291	0.3101	0.490538	0.422768	0.963262	77.1903	79.6918	8.7858
CTCF	opp	-28.5	73	70.4988	72.8741	8.39636	0.353944	0.490538	0.297892	0.859057	82.0653	84.8303	9.05899
CTCF	same	-27.5	65	72.1394	74.7941	8.49349	0.219405	0.43029	-0.84057	0.963262	74.8907	77.6466	8.65394
CTCF	opp	-27.5	80	71.4298	73.8156	8.45162	0.142096	0.341707	1.01403	0.859057	83.1491	85.9262	9.11861
CTCF	same	-26.5	75	70.7879	73.1681	8.41356	0.283106	0.478206	0.500631	0.963262	73.4877	75.9587	8.5725
CTCF	opp	-26.5	56	71.1482	73.3667	8.43494	0.0374213	0.171798	-1.79588	0.859057	82.8212	85.4037	9.10062
CTCF	opp	-25.5	73	71.8763	74.3165	8.47799	0.41667	0.490538	0.132542	0.859057	83.6688	86.5094	9.14707
CTCF	same	-25.5	66	67.9397	70.2049	8.24255	0.438427	0.490538	-0.235327	0.963262	70.5309	72.8825	8.39827
CTCF	same	-24.5	50	62.4998	64.3975	7.90568	0.0606994	0.245226	-1.58112	0.963262	64.8835	66.8536	8.05503
CTCF	opp	-24.5	79	71.257	73.754	8.44139	0.164053	0.380906	0.917266	0.859057	82.9479	85.8545	9.10757
CTCF	opp	-23.5	84	63.5051	65.5338	7.96901	0.00576363	0.0529206	2.57182	0.859057	73.9242	76.2858	8.59792
CTCF	same	-23.5	41	55.0274	56.6535	7.41805	0.0298083	0.154392	-1.89099	0.963262	57.1261	58.8142	7.55818
CTCF	same	-22.5	48	50.6706	52.2534	7.11833	0.388396	0.490538	-0.375167	0.963262	52.6031	54.2463	7.2528
CTCF	opp	-22.5	78	62.495	64.5864	7.90538	0.0246177	0.138133	1.96132	0.859057	72.7484	75.1828	8.52927
CTCF	opp	-21.5	59	59.0789	61.0992	7.68628	0.530459	0.549501	-0.0102646	0.859057	68.7718	71.1235	8.29288
CTCF	same	-21.5	37	56.9881	58.7773	7.54905	0.00315626	0.0354202	-2.64777	0.963262	59.1616	61.019	7.69166
CTCF	opp	-20.5	62	67.3031	69.4289	8.20384	0.283648	0.478206	-0.646411	0.859057	78.3452	80.8199	8.85129
CTCF	same	-20.5	37	57.0324	59.0398	7.55198	0.003104	0.0354202	-2.6526	0.963262	59.2075	61.2915	7.69464
CTCF	same	-19.5	64	60.7273	62.7463	7.79277	0.308379	0.490538	0.419965	0.963262	63.0434	65.1394	7.93999
CTCF	opp	-19.5	75	71.2494	73.5382	8.44094	0.302138	0.490538	0.444329	0.859057	82.9391	85.6034	9.10709
CTCF	opp	-18.5	56	59.1323	61.1918	7.68975	0.373341	0.490538	-0.407334	0.859057	68.8339	71.2313	8.29662
CTCF	same	-18.5	62	78.5606	80.9067	8.86344	0.0314326	0.154863	-1.86842	0.963262	81.5569	83.9924	9.03088
CTCF	same	-17.5	64	93.1586	96.2885	9.65187	0.000883589	0.0127489	-3.02103	0.963262	96.7116	99.9609	9.83421
CTCF	opp	-17.5	50	59.7214	61.641	7.72796	0.114313	0.329874	-1.25795	0.859057	69.5197	71.7542	8.33785
CTCF	opp	-16.5	46	53.5839	55.4141	7.3201	0.166781	0.382837	-1.03604	0.859057	62.3753	64.5057	7.8978
CTCF	same	-16.5	78	97.5257	101.087	9.87551	0.0239978	0.138133	-1.97718	0.963262	101.245	104.943	10.0621
CTCF	opp	-15.5	57	51.4153	53.1126	7.17045	0.196145	0.409832	0.778848	0.859057	59.8509	61.8267	7.73633
CTCF	same	-15.5	142	94.5132	97.5486	9.72179	2.07448e-06	8.3809e-05	4.88457	0.963262	98.1179	101.269	9.90545
CTCF	same	-14.5	113	89.4364	92.214	9.45708	0.00697599	0.0587146	2.49164	0.963262	92.8474	95.731	9.63574
CTCF	opp	-14.5	54	55.9975	57.8114	7.48315	0.429127	0.490538	-0.266934	0.859057	65.1848	67.2964	8.07371
CTCF	same	-13.5	82	82.2381	85.2872	9.06852	0.518849	0.545872	-0.0262512	0.963262	85.3746	88.54	9.23984
CTCF	opp	-13.5	70	66.9892	69.3009	8.1847	0.32798	0.490538	0.367852	0.859057	77.9799	80.6709	8.83063
CTCF	same	-12.5	73	79.2137	81.9028	8.90021	0.264037	0.478206	-0.698158	0.963262	82.2349	85.0265	9.06835
CTCF	opp	-12.5	66	66.1682	68.5667	8.13438	0.524425	0.54888	-0.0206783	0.859057	77.0242	79.8162	8.77634
CTCF	same	-11.5	61	80.9302	83.9354	8.99612	0.0126471	0.0851572	-2.21543	0.963262	84.0169	87.1366	9.16607
CTCF	opp	-11.5	61	64.0638	66.3227	8.00399	0.381521	0.490538	-0.382789	0.859057	74.5746	77.204	8.63566
CTCF	same	-10.5	60	81.0048	84.0199	9.00027	0.00897234	0.0724965	-2.3338	0.963262	84.0943	87.2244	9.17029
CTCF	opp	-10.5	62	64.0093	66.2178	8.00058	0.433117	0.490538	-0.251144	0.859057	74.5111	77.0819	8.63198
CTCF	same	-9.5	72	91.6527	95.1998	9.57354	0.0197455	0.120866	-2.05281	0.963262	95.1483	98.8307	9.7544
CTCF	opp	-9.5	52	53.2362	55.3049	7.29632	0.468837	0.503751	-0.169434	0.859057	61.9705	64.3786	7.87214
CTCF	same	-8.5	40	69.8917	71.9681	8.36012	7.31002e-05	0.00134238	-3.57551	0.963262	72.5573	74.713	8.51806
CTCF	opp	-8.5	38	50.3365	51.8347	7.09482	0.0430353	0.193181	-1.7388	0.859057	58.595	60.339	7.65474
CTCF	opp	-7.5	60	57.6217	58.7809	7.59089	0.345349	0.490538	0.313314	0.859057	67.0755	68.4248	8.18996
CTCF	same	-7.5	16	39.2039	40.3674	6.2613	2.30735e-05	0.000665835	-3.70593	0.963262	40.6991	41.907	6.37959
CTCF	opp	-6.5	26	21.4306	21.9565	4.62932	0.137739	0.339309	0.987065	0.859057	24.9466	25.5588	4.99466
CTCF	same	-6.5	30	55.901	57.6977	7.4767	0.000109373	0.00184111	-3.46423	0.963262	58.0331	59.8982	7.61794
CTCF	same	-5.5	109	131.972	135.425	11.4879	0.0226916	0.134815	-1.99971	0.963262	137.006	140.59	11.7049
CTCF	opp	-5.5	7	7.02998	7.26677	2.65141	0.594246	0.612437	-0.011309	0.859057	8.18337	8.459	2.86066
CTCF	opp	-4.5	9	8.70383	8.92146	2.95023	0.373634	0.490538	0.100389	0.859057	10.1318	10.3852	3.18305
CTCF	same	-4.5	16	30.925	31.53	5.56103	0.00242962	0.0327189	-2.68386	0.963262	32.1045	32.7326	5.66608
CTCF	opp	-3.5	42	41.3298	42.3802	6.42883	0.417987	0.490538	0.104244	0.859057	48.1107	49.3334	6.93619
CTCF	same	-3.5	25	41.7245	43.1566	6.45945	0.0036752	0.0390078	-2.58915	0.963262	43.3158	44.8026	6.58148
CTCF	same	-2.5	184	112.64	117.55	10.6132	2.67919e-10	1.99739e-08	6.72368	0.963262	116.936	122.033	10.8137
CTCF	opp	-2.5	35	36.7642	38.4017	6.06335	0.427801	0.490538	-0.290966	0.859057	42.796	44.7022	6.54187
CTCF	same	-1.5	6	8.28194	8.42631	2.87784	0.280164	0.478206	-0.792937	0.963262	8.59781	8.74768	2.9322
CTCF	opp	-1.5	71	88.2879	91.8015	9.39617	0.0336294	0.161741	-1.83989	0.859057	102.773	106.863	10.1377
CTCF	same	-0.5	0	0.134964	0.136803	0.367375	0.873747	0.891399	-0.367375	0.963262	0.140112	0.142021	0.374315
CTCF	opp	-0.5	261	173.862	177.007	13.1857	2.96642e-10	1.99739e-08	6.6085	0.859057	202.387	206.048	14.2263
CTCF	opp	0.5	326	321.741	339.609	17.9371	0.392071	0.490538	0.237429	0.905278	364.717	384.971	19.0976
CTCF	same	0.5	0	0	0	0	1	1	0	0.86142	0	0	0
CTCF	same	1.5	0	0.106541	0.109414	0.326406	0.898938	0.907928	-0.326406	0.86142	0.12368	0.127016	0.351682
CTCF	opp	1.5	110	177.612	180.269	13.3271	3.27238e-08	1.65255e-06	-5.07329	0.905278	196.197	199.131	14.007
CTCF	same	2.5	0	0.119969	0.125098	0.346365	0.886948	0.900319	-0.346365	0.86142	0.139269	0.145223	0.373187
CTCF	opp	2.5	97	147.079	150.227	12.1276	7.02551e-06	0.000236525	-4.12932	0.905278	162.468	165.946	12.7463
CTCF	opp	3.5	237	134.551	136.948	11.5996	5.55112e-16	1.12133e-13	8.83214	0.905278	148.629	151.278	12.1914
CTCF	same	3.5	0	0.0274135	0.0272224	0.16557	0.972959	0.977799	-0.16557	0.86142	0.0318236	0.0316017	0.178392
CTCF	same	4.5	2	4.89605	4.97471	2.2127	0.133685	0.337555	-1.30883	0.86142	5.68369	5.77501	2.38405
CTCF	opp	4.5	24	39.9885	41.9934	6.32365	0.00450487	0.0433325	-2.52837	0.905278	44.1726	46.3874	6.64625
CTCF	same	5.5	4	4.10837	4.16697	2.02691	0.607675	0.623099	-0.0534651	0.86142	4.7693	4.83733	2.18387
CTCF	opp	5.5	33	16.0457	16.4234	4.0057	6.34097e-05	0.00128286	4.23255	0.905278	17.7246	18.1419	4.21006
CTCF	opp	6.5	34	52.7871	53.7879	7.26547	0.00386216	0.0390078	-2.58581	0.905278	58.3104	59.4159	7.63613
CTCF	same	6.5	7	9.91314	10.2496	3.14851	0.228147	0.443133	-0.925242	0.86142	11.5079	11.8985	3.39233
CTCF	same	7.5	58	56.4486	58.0272	7.51323	0.384569	0.490538	0.206488	0.86142	65.5297	67.3622	8.09504
CTCF	opp	7.5	30	35.4367	36.5651	5.95287	0.205834	0.419627	-0.913292	0.905278	39.1446	40.3911	6.25656
CTCF	same	8.5	26	52.7491	54.6153	7.26285	3.50364e-05	0.00088467	-3.683	0.86142	61.235	63.4015	7.82528
CTCF	opp	8.5	32	40.3367	41.4251	6.35112	0.10561	0.313999	-1.31263	0.905278	44.5572	45.7595	6.67512
CTCF	same	9.5	37	44.1221	45.5272	6.64245	0.159206	0.373948	-1.07221	0.86142	51.2202	52.8514	7.15683
CTCF	opp	9.5	79	74.4425	76.8371	8.62801	0.274636	0.478206	0.528222	0.905278	82.2316	84.8768	9.06817
CTCF	opp	10.5	60	79.8585	82.2851	8.93636	0.0124002	0.0851572	-2.22222	0.905278	88.2144	90.8948	9.39225
CTCF	same	10.5	40	64.4395	66.5727	8.02742	0.000734255	0.0114092	-3.04451	0.86142	74.8062	77.2825	8.64906
CTCF	opp	11.5	105	85.5901	88.3	9.25149	0.0181648	0.114665	2.09803	0.905278	94.5457	97.5391	9.72346
CTCF	same	11.5	67	53.056	54.8614	7.28396	0.0271842	0.148411	1.91434	0.86142	61.5914	63.6872	7.84802
CTCF	opp	12.5	75	86.4301	88.9994	9.29678	0.118302	0.331903	-1.22947	0.905278	95.4736	98.3117	9.77106
CTCF	same	12.5	50	49.4497	51.1873	7.03205	0.431521	0.490538	0.0782519	0.86142	57.4049	59.422	7.5766
CTCF	opp	13.5	85	64.6971	66.7549	8.04345	0.00650839	0.0571607	2.52416	0.905278	71.4665	73.7397	8.45379
CTCF	same	13.5	54	56.9333	58.8665	7.54541	0.381127	0.490538	-0.388747	0.86142	66.0923	68.3365	8.12972
CTCF	opp	14.5	84	54.1309	55.89	7.35737	6.35079e-05	0.00128286	4.05976	0.905278	59.7948	61.7379	7.73271
CTCF	same	14.5	59	70.1418	72.2825	8.37507	0.0994807	0.309155	-1.33035	0.86142	81.4257	83.9109	9.02362
CTCF	same	15.5	103	86.4475	89.1938	9.29772	0.0362766	0.170416	1.78027	0.86142	100.355	103.543	10.0177
CTCF	opp	15.5	36	52.4172	54.2601	7.23997	0.0106575	0.0809989	-2.26758	0.905278	57.9018	59.9375	7.60932
CTCF	opp	16.5	56	69.5997	71.8484	8.34264	0.0544587	0.232757	-1.63014	0.905278	76.8821	79.3662	8.76824
CTCF	same	16.5	51	59.9886	62.1856	7.74523	0.135368	0.337585	-1.16053	0.86142	69.6392	72.1896	8.34501
CTCF	same	17.5	79	57.4199	59.5804	7.57759	0.00277949	0.0350911	2.84788	0.86142	66.6573	69.1653	8.16439
CTCF	opp	17.5	64	75.6797	78.2266	8.69941	0.0969415	0.307378	-1.34259	0.905278	83.5983	86.4117	9.14321
CTCF	opp	18.5	78	75.0479	77.8056	8.66302	0.339215	0.490538	0.340766	0.905278	82.9004	85.9467	9.10497
CTCF	same	18.5	54	61.6377	63.6935	7.85097	0.182497	0.405103	-0.972833	0.86142	71.5536	73.9401	8.45893
CTCF	opp	19.5	86	82.8077	85.6266	9.09988	0.336879	0.490538	0.350803	0.905278	91.4722	94.586	9.56411
CTCF	same	19.5	53	63.1479	65.1906	7.94657	0.110179	0.322554	-1.27702	0.86142	73.3068	75.678	8.56194
CTCF	same	20.5	67	64.2385	66.5436	8.01489	0.335705	0.490538	0.344545	0.86142	74.5728	77.2487	8.63555
CTCF	opp	20.5	73	83.845	86.5979	9.15669	0.128049	0.337555	-1.18438	0.905278	92.618	95.6589	9.62382
CTCF	opp	21.5	67	80.4779	83.2378	8.97095	0.0708812	0.260327	-1.50239	0.905278	88.8985	91.9473	9.4286
CTCF	same	21.5	59	62.412	64.5627	7.90013	0.363087	0.490538	-0.431892	0.86142	72.4525	74.9491	8.5119
CTCF	opp	22.5	82	80.6036	83.3425	8.97795	0.409465	0.490538	0.155532	0.905278	89.0375	92.0629	9.43597
CTCF	same	22.5	56	58.7651	60.6611	7.66584	0.391473	0.490538	-0.360707	0.86142	68.2189	70.4199	8.25947
CTCF	opp	23.5	82	85.4959	88.4859	9.2464	0.379128	0.490538	-0.378086	0.905278	94.4416	97.7444	9.71811
CTCF	same	23.5	49	56.0068	57.8804	7.48377	0.193688	0.409832	-0.936269	0.86142	65.0168	67.1918	8.0633
CTCF	opp	24.5	68	80.1589	82.9028	8.95315	0.0939651	0.307378	-1.35805	0.905278	88.5461	91.5772	9.4099
CTCF	same	24.5	69	57.7143	59.7944	7.59699	0.0637672	0.247698	1.48555	0.86142	66.999	69.4137	8.18529
CTCF	opp	25.5	96	77.3169	80.0763	8.793	0.0170914	0.11137	2.12477	0.905278	85.4068	88.455	9.24158
CTCF	same	25.5	57	58.6347	60.6789	7.65733	0.449554	0.490864	-0.213485	0.86142	68.0675	70.4405	8.2503
CTCF	same	26.5	58	62.3363	64.3244	7.89534	0.319306	0.490538	-0.549228	0.86142	72.3646	74.6725	8.50674
CTCF	opp	26.5	68	75.5826	78.1491	8.69382	0.209431	0.419627	-0.872181	0.905278	83.491	86.3261	9.13734
CTCF	same	27.5	73	64.3396	66.4962	8.0212	0.127818	0.337555	1.07969	0.86142	74.6901	77.1937	8.64235
CTCF	opp	27.5	73	76.2978	79.0328	8.73486	0.380921	0.490538	-0.377548	0.905278	84.2811	87.3023	9.18047
CTCF	same	28.5	60	62.7326	64.8037	7.92039	0.39652	0.490538	-0.345008	0.86142	72.8246	75.2289	8.53373
CTCF	opp	28.5	77	76.432	79.0759	8.74254	0.443965	0.490538	0.0649672	0.905278	84.4293	87.3498	9.18854
CTCF	same	29.5	69	61.5892	63.5375	7.84788	0.156642	0.372254	0.944304	0.86142	71.4973	73.7591	8.45561
CTCF	opp	29.5	95	75.1043	77.734	8.66628	0.0114256	0.0824276	2.29576	0.905278	82.9627	85.8676	9.10839
CTCF	same	30.5	51	61.3497	63.3109	7.8326	0.101739	0.311384	-1.32136	0.86142	71.2192	73.496	8.43915
CTCF	opp	30.5	70	74.0727	76.8198	8.60655	0.344959	0.490538	-0.473214	0.905278	81.8232	84.8577	9.04562
CTCF	same	31.5	60	62.38	64.3584	7.8981	0.413715	0.490538	-0.301344	0.86142	72.4154	74.712	8.50972
CTCF	opp	31.5	80	75.7104	78.4007	8.70117	0.28645	0.478206	0.492992	0.905278	83.6322	86.604	9.14506
CTCF	opp	32.5	81	73.5556	75.9896	8.57646	0.176325	0.395752	0.868001	0.905278	81.252	83.9406	9.01399
CTCF	same	32.5	65	63.3403	65.6232	7.95866	0.385637	0.490538	0.208543	0.86142	73.5301	76.1802	8.57497
CTCF	opp	33.5	88	71.986	74.6378	8.48446	0.0288962	0.153606	1.88745	0.905278	79.5182	82.4474	8.9173
CTCF	same	33.5	73	62.9415	65.0442	7.93357	0.0939975	0.307378	1.26784	0.86142	73.0671	75.5081	8.54793
CTCF	same	34.5	59	60.7051	62.6724	7.79135	0.446826	0.490538	-0.218847	0.86142	70.471	72.7547	8.3947
CTCF	opp	34.5	67	68.8524	71.0794	8.29774	0.443012	0.490538	-0.223244	0.905278	76.0567	78.5167	8.72105
CTCF	opp	35.5	58	68.7618	71.018	8.29228	0.105703	0.313999	-1.29782	0.905278	75.9566	78.4488	8.71531
CTCF	same	35.5	66	62.7976	64.7592	7.92449	0.314335	0.490538	0.40412	0.86142	72.9	75.1773	8.53815
CTCF	opp	36.5	69	68.0247	70.4555	8.24771	0.421364	0.490538	0.118253	0.905278	75.1423	77.8274	8.66847
CTCF	same	36.5	67	65.1297	67.2506	8.0703	0.377326	0.490538	0.231747	0.86142	75.6074	78.0694	8.69525
CTCF	opp	37.5	71	72.1655	74.6298	8.49503	0.476565	0.509345	-0.137195	0.905278	79.7164	82.4386	8.9284
CTCF	same	37.5	67	65.7201	67.9138	8.10679	0.40552	0.490538	0.157886	0.86142	76.2927	78.8394	8.73457
CTCF	opp	38.5	80	77.3108	79.9369	8.79266	0.352302	0.490538	0.305845	0.905278	85.4001	88.301	9.24122
CTCF	same	38.5	66	63.6578	65.9398	7.97858	0.354054	0.490538	0.293561	0.86142	73.8987	76.5478	8.59643
CTCF	same	39.5	64	63.9788	66.2402	7.99868	0.465767	0.503128	0.00264675	0.86142	74.2713	76.8965	8.61808
CTCF	opp	39.5	61	74.5165	77.0117	8.6323	0.062346	0.246939	-1.56581	0.905278	82.3134	85.0697	9.07268
CTCF	opp	40.5	74	73.1719	75.7845	8.55406	0.430833	0.490538	0.0968114	0.905278	80.8281	83.714	8.99044
CTCF	same	40.5	77	64.4467	66.4835	8.02787	0.0553087	0.232757	1.56371	0.86142	74.8145	77.1789	8.64954
CTCF	same	41.5	69	63.8648	65.9661	7.99155	0.23708	0.452498	0.642573	0.86142	74.139	76.5783	8.6104
CTCF	opp	41.5	78	72.5614	75.0197	8.5183	0.23969	0.452498	0.638466	0.905278	80.1537	82.8692	8.95286
CTCF	opp	42.5	73	76.2175	78.8206	8.73026	0.384413	0.490538	-0.368543	0.905278	84.1924	87.0679	9.17564
CTCF	same	42.5	66	65.5502	67.8502	8.09631	0.445276	0.490538	0.055558	0.86142	76.0955	78.7656	8.72327
CTCF	same	43.5	53	65.3478	67.6023	8.0838	0.0678118	0.253667	-1.52747	0.86142	75.8605	78.4778	8.70979
CTCF	opp	43.5	79	79.013	81.7194	8.88893	0.52929	0.549501	-0.00146597	0.905278	87.2804	90.2699	9.3424
CTCF	opp	44.5	72	75.7114	78.2584	8.70123	0.362268	0.490538	-0.426534	0.905278	83.6333	86.4469	9.14512
CTCF	same	44.5	74	65.1647	67.5401	8.07247	0.124956	0.337555	1.09449	0.86142	75.648	78.4055	8.69759
CTCF	opp	45.5	76	77.0518	79.6779	8.77791	0.482493	0.512967	-0.119822	0.905278	85.114	88.0149	9.22572
CTCF	same	45.5	59	68.6807	71.121	8.28738	0.132782	0.337555	-1.16813	0.86142	79.7297	82.5624	8.92915
CTCF	opp	46.5	91	74.9773	77.5514	8.65894	0.0312696	0.154863	1.85042	0.905278	82.8224	85.6659	9.10068
CTCF	same	46.5	60	66.9237	69.2148	8.18069	0.218413	0.43029	-0.846347	0.86142	77.69	80.3496	8.81419
CTCF	opp	47.5	64	76.1102	78.7118	8.72412	0.0889351	0.30449	-1.38813	0.905278	84.0739	86.9477	9.16918
CTCF	same	47.5	55	67.7352	70.1714	8.23014	0.06499	0.247698	-1.54739	0.86142	78.632	81.4601	8.86747
CTCF	same	48.5	66	68.8128	71.1792	8.29535	0.397373	0.490538	-0.339085	0.86142	79.883	82.6301	8.93773
CTCF	opp	48.5	78	78.35	80.9512	8.85155	0.514275	0.543893	-0.0395425	0.905278	86.548	89.4214	9.30312
CTCF	same	49.5	71	67.4645	69.76	8.21368	0.306197	0.490538	0.430439	0.86142	78.3178	80.9826	8.84973
CTCF	opp	49.5	87	77.5355	80.0606	8.80543	0.129835	0.337555	1.07485	0.905278	85.6483	88.4376	9.25464
CTCF	opp	50.5	63	75.3341	77.8133	8.67952	0.0834962	0.292229	-1.42106	0.905278	83.2166	85.9552	9.12231
CTCF	same	50.5	71	66.2134	68.3804	8.13716	0.254126	0.470948	0.588234	0.86142	76.8654	79.381	8.76729
CTCF	opp	51.5	86	76.5527	79.2003	8.74944	0.128772	0.337555	1.07976	0.905278	84.5626	87.4872	9.19579
CTCF	same	51.5	68	66.6847	68.7733	8.16607	0.404523	0.490538	0.161073	0.86142	77.4125	79.8371	8.79844
CTCF	same	52.5	59	65.3409	67.5001	8.08337	0.237988	0.452498	-0.784437	0.86142	75.8525	78.3591	8.70934
CTCF	opp	52.5	77	75.1418	77.7245	8.66844	0.385985	0.490538	0.214367	0.905278	83.0041	85.8571	9.11066
E2F/1	same	-44.5	19	11.2484	11.5953	3.40519	0.0115717	0.161953	2.27641	0.860756	13.068	13.4711	3.61497
E2F/1	opp	-44.5	7	10.3372	10.6587	3.26477	0.191371	0.478999	-1.02218	0.773656	13.3615	13.777	3.65533
E2F/1	opp	-43.5	19	9.79492	10.1312	3.18296	0.00275633	0.0743963	2.89199	0.773656	12.6606	13.0953	3.55817
E2F/1	same	-43.5	11	10.9321	11.234	3.35171	0.412633	0.493016	0.0202469	0.860756	12.7006	13.0513	3.56379
E2F/1	same	-42.5	14	11.601	11.9937	3.4632	0.193135	0.478999	0.692711	0.860756	13.4777	13.934	3.6712
E2F/1	opp	-42.5	12	10.2188	10.547	3.24761	0.229623	0.478999	0.548459	0.773656	13.2085	13.6326	3.63435
E2F/1	opp	-41.5	11	10.5122	10.9235	3.30507	0.362716	0.485946	0.147588	0.773656	13.5877	14.1193	3.68615
E2F/1	same	-41.5	10	10.9144	11.3618	3.37073	0.470147	0.518149	-0.271276	0.860756	12.68	13.1998	3.5609
E2F/1	same	-40.5	16	11.1549	11.5117	3.3929	0.0618076	0.366858	1.42801	0.860756	12.9594	13.374	3.59992
E2F/1	opp	-40.5	12	10.5551	10.9009	3.30165	0.263749	0.478999	0.437622	0.773656	13.6432	14.0901	3.69367
E2F/1	same	-39.5	12	11.6825	12.098	3.47821	0.387777	0.485946	0.0912749	0.860756	13.5724	14.055	3.68407
E2F/1	opp	-39.5	9	10.2686	10.6008	3.25589	0.424809	0.501057	-0.389628	0.773656	13.2728	13.7023	3.64319
E2F/1	opp	-38.5	19	10.5695	10.9205	3.30462	0.00619987	0.117734	2.55112	0.773656	13.6618	14.1155	3.69618
E2F/1	same	-38.5	10	11.7738	12.171	3.48869	0.37138	0.485946	-0.508447	0.860756	13.6785	14.1399	3.69844
E2F/1	same	-37.5	14	11.1833	11.56	3.39999	0.159624	0.452601	0.828433	0.860756	12.9925	13.43	3.6045
E2F/1	opp	-37.5	9	10.4842	10.793	3.28527	0.399	0.485946	-0.451762	0.773656	13.5514	13.9506	3.68123
E2F/1	same	-36.5	17	11.2561	11.679	3.41746	0.0387025	0.26375	1.68076	0.860756	13.0769	13.5683	3.61621
E2F/1	opp	-36.5	10	11.212	11.7022	3.42085	0.434841	0.507765	-0.354291	0.773656	14.4922	15.1259	3.80686
E2F/1	opp	-35.5	13	11.1272	11.5569	3.39954	0.230621	0.478999	0.550897	0.773656	14.3826	14.938	3.79244
E2F/1	same	-35.5	10	10.921	11.3078	3.36271	0.469353	0.518149	-0.273885	0.860756	12.6877	13.1371	3.56198
E2F/1	same	-34.5	19	11.298	11.6767	3.41713	0.0120765	0.161953	2.25395	0.860756	13.1256	13.5657	3.62293
E2F/1	opp	-34.5	10	10.8714	11.257	3.35514	0.475329	0.518149	-0.259716	0.773656	14.052	14.5504	3.74859
E2F/1	same	-33.5	16	11.4807	11.8583	3.44358	0.0755256	0.397049	1.3124	0.860756	13.3379	13.7766	3.65211
E2F/1	opp	-33.5	7	10.7839	11.1486	3.33896	0.157703	0.452601	-1.13326	0.773656	13.9389	14.4103	3.73348
E2F/1	same	-32.5	16	11.6741	12.1249	3.48209	0.0845587	0.399194	1.24232	0.860756	13.5627	14.0864	3.68275
E2F/1	opp	-32.5	10	10.94	11.3698	3.37191	0.467073	0.518149	-0.278768	0.773656	14.1406	14.6962	3.7604
E2F/1	opp	-31.5	17	10.6692	11.1031	3.33213	0.0250245	0.253901	1.89993	0.773656	13.7906	14.3514	3.71357
E2F/1	same	-31.5	15	11.2823	11.6879	3.41875	0.108442	0.399194	1.08743	0.860756	13.1075	13.5786	3.62043
E2F/1	opp	-30.5	7	11.0187	11.4232	3.37983	0.141986	0.437705	-1.18904	0.773656	14.2424	14.7653	3.77391
E2F/1	same	-30.5	12	11.1419	11.5799	3.40293	0.326928	0.478999	0.252161	0.860756	12.9443	13.4532	3.59782
E2F/1	same	-29.5	8	10.1219	10.4045	3.22561	0.31926	0.478999	-0.657836	0.860756	11.7593	12.0877	3.42919
E2F/1	opp	-29.5	11	10.7028	11.0224	3.31999	0.385306	0.485946	0.0895094	0.773656	13.8341	14.2471	3.71942
E2F/1	opp	-28.5	15	10.343	10.7505	3.27879	0.0616916	0.366858	1.42034	0.773656	13.369	13.8957	3.65636
E2F/1	same	-28.5	9	10.0945	10.4312	3.22974	0.446167	0.51433	-0.338874	0.860756	11.7275	12.1187	3.42454
E2F/1	opp	-27.5	12	10.0306	10.3533	3.21765	0.211354	0.478999	0.612055	0.773656	12.9652	13.3823	3.60072
E2F/1	same	-27.5	10	10.034	10.3502	3.21718	0.578785	0.590892	-0.0105721	0.860756	11.6572	12.0246	3.41427
E2F/1	same	-26.5	5	9.54921	9.87123	3.14185	0.0861808	0.399194	-1.44794	0.860756	11.094	11.4681	3.33076
E2F/1	opp	-26.5	8	9.72111	10.1002	3.17808	0.365081	0.485946	-0.541555	0.773656	12.5652	13.0552	3.54474
E2F/1	same	-25.5	8	10.5842	10.9762	3.31303	0.271005	0.478999	-0.780003	0.860756	12.2964	12.7518	3.50662
E2F/1	opp	-25.5	9	9.57735	9.91488	3.14879	0.511792	0.541206	-0.183355	0.773656	12.3793	12.8156	3.51843
E2F/1	same	-24.5	13	10.8198	11.2481	3.35382	0.202305	0.478999	0.650059	0.860756	12.5701	13.0677	3.54544
E2F/1	opp	-24.5	10	9.31468	9.61388	3.10063	0.33191	0.478999	0.221025	0.773656	12.0398	12.4266	3.46985
E2F/1	same	-23.5	7	11.4059	11.7678	3.43042	0.118861	0.420586	-1.28435	0.860756	13.251	13.6714	3.64019
E2F/1	opp	-23.5	11	10.017	10.3212	3.21267	0.305161	0.478999	0.305972	0.773656	12.9476	13.3408	3.59828
E2F/1	same	-22.5	6	12.5035	12.8807	3.58897	0.0344975	0.253901	-1.81209	0.860756	14.5262	14.9644	3.81133
[truncated: 32,957 more rows]

## Sheet: 2_CPD_formation_nakedDNA
TF_cluster	strand	position	observed_count	predicted_count	predicted_var	predicted_std_dev	pval	qval	zscore	scaling_factor	predicted_count_raw	predicted_var_raw	predicted_std_dev_raw
AP1/1	opp	-41.5	695	630.062	698.042	26.4205	0.00508172	0.0971173	2.45785	0.968013	650.882	721.107	25.5124
AP1/1	same	-41.5	594	611.655	676.327	26.0063	0.245047	0.400825	-0.678879	0.942949	648.662	717.247	25.4688
AP1/1	opp	-40.5	717	629.409	695.964	26.3811	0.000290547	0.024987	3.3202	0.968013	650.207	718.961	25.4992
AP1/1	same	-40.5	563	599.87	664.278	25.7736	0.0676536	0.258587	-1.43055	0.942949	636.164	704.469	25.2223
AP1/1	same	-39.5	585	604.96	669.422	25.8732	0.215147	0.393351	-0.771469	0.942949	641.562	709.924	25.3291
AP1/1	opp	-39.5	626	632.403	700.114	26.4597	0.409644	0.480499	-0.241989	0.968013	653.3	723.248	25.5597
AP1/1	same	-38.5	584	609.446	674.434	25.9699	0.156076	0.356751	-0.979839	0.942949	646.32	715.239	25.4228
AP1/1	opp	-38.5	608	608.876	672.96	25.9415	0.49661	0.527822	-0.0337813	0.968013	628.996	695.196	25.0798
AP1/1	opp	-37.5	672	606.499	671.588	25.915	0.00414358	0.089087	2.52754	0.968013	626.54	693.78	25.0308
AP1/1	same	-37.5	554	590.92	652.71	25.5482	0.0658931	0.257582	-1.44512	0.942949	626.673	692.201	25.0334
AP1/1	same	-36.5	584	614.38	679.539	26.068	0.113396	0.31974	-1.1654	0.942949	651.551	720.653	25.5255
AP1/1	opp	-36.5	597	622.594	690.272	26.273	0.157242	0.356751	-0.974168	0.968013	643.167	713.081	25.3607
AP1/1	opp	-35.5	626	603.862	667.325	25.8326	0.178186	0.373757	0.856971	0.968013	623.816	689.375	24.9763
AP1/1	same	-35.5	598	593.443	654.906	25.5911	0.415218	0.48213	0.178084	0.942949	629.348	694.53	25.0868
AP1/1	opp	-34.5	570	590.827	653.385	25.5614	0.20208	0.381953	-0.81477	0.968013	610.35	674.975	24.7053
AP1/1	same	-34.5	579	592.416	652.731	25.5486	0.299535	0.41216	-0.525126	0.942949	628.259	692.223	25.0651
AP1/1	same	-33.5	689	629.637	696.271	26.3869	0.00924	0.116005	2.24972	0.942949	667.732	738.398	25.8405
AP1/1	opp	-33.5	648	594.644	656.556	25.6234	0.014513	0.132967	2.08231	0.968013	614.293	678.251	24.7849
AP1/1	same	-32.5	565	602.629	666.222	25.8113	0.0640606	0.257582	-1.45785	0.942949	639.09	706.531	25.2802
AP1/1	opp	-32.5	603	612.816	678.235	26.0429	0.355492	0.449593	-0.376915	0.968013	633.066	700.646	25.1608
AP1/1	same	-31.5	559	582.14	643.703	25.3713	0.174228	0.370178	-0.91207	0.942949	617.362	682.649	24.8468
AP1/1	opp	-31.5	639	620.694	686.2	26.1954	0.224303	0.393675	0.698827	0.968013	641.204	708.875	25.322
AP1/1	same	-30.5	572	591.261	653.423	25.5621	0.221012	0.393675	-0.753479	0.942949	627.034	692.957	25.0406
AP1/1	opp	-30.5	627	623.333	689.684	26.2618	0.431175	0.48213	0.139629	0.968013	643.93	712.473	25.3758
AP1/1	opp	-29.5	628	611.254	675.322	25.987	0.241646	0.400825	0.644397	0.968013	631.452	697.637	25.1287
AP1/1	same	-29.5	613	617.562	682.851	26.1314	0.437661	0.48213	-0.174561	0.942949	654.926	724.165	25.5915
AP1/1	opp	-28.5	633	616.435	681.74	26.1101	0.244824	0.400825	0.634423	0.968013	636.804	704.267	25.235
AP1/1	same	-28.5	611	606.098	669.942	25.8832	0.410659	0.480499	0.189379	0.942949	642.769	710.475	25.3529
AP1/1	same	-27.5	619	638.762	709.613	26.6386	0.223806	0.393675	-0.741873	0.942949	677.41	752.547	26.0271
AP1/1	opp	-27.5	632	624.801	690.816	26.2834	0.376749	0.45958	0.273895	0.968013	645.447	713.643	25.4056
AP1/1	same	-26.5	576	601.665	664.164	25.7714	0.15236	0.356751	-0.995868	0.942949	638.067	704.348	25.26
AP1/1	opp	-26.5	617	617.654	684.183	26.1569	0.500203	0.527822	-0.0250039	0.968013	638.063	706.79	25.2599
AP1/1	opp	-25.5	645	617.115	683.284	26.1397	0.127003	0.330977	1.06675	0.968013	637.507	705.862	25.2489
AP1/1	same	-25.5	582	607.912	672.525	25.9331	0.151234	0.356751	-0.999174	0.942949	644.692	713.214	25.3908
AP1/1	same	-24.5	556	597.456	660.169	25.6938	0.0456692	0.218197	-1.61346	0.942949	633.604	700.112	25.1715
AP1/1	opp	-24.5	604	600.98	663.683	25.762	0.440295	0.48213	0.117209	0.968013	620.839	685.613	24.9166
AP1/1	opp	-23.5	658	626.935	692.982	26.3246	0.104399	0.314171	1.18007	0.968013	647.651	715.881	25.449
AP1/1	same	-23.5	579	594.186	655.965	25.6118	0.274886	0.400825	-0.592913	0.942949	630.136	695.653	25.1025
AP1/1	opp	-22.5	591	624.936	689.587	26.26	0.0896405	0.291862	-1.2923	0.968013	645.586	712.373	25.4084
AP1/1	same	-22.5	588	602.001	665.346	25.7943	0.292697	0.411879	-0.542802	0.942949	638.424	705.601	25.2671
AP1/1	same	-21.5	562	600.848	664.117	25.7705	0.0576651	0.241912	-1.50747	0.942949	637.201	704.298	25.2428
AP1/1	opp	-21.5	632	624.418	690.124	26.2702	0.370932	0.458995	0.288609	0.968013	645.051	712.928	25.3979
AP1/1	same	-20.5	608	585.281	645.196	25.4007	0.168433	0.370178	0.894441	0.942949	620.692	684.232	24.9137
AP1/1	opp	-20.5	609	626.529	693.05	26.3258	0.249275	0.400825	-0.665864	0.968013	647.232	715.95	25.4408
AP1/1	same	-19.5	613	592.517	654.107	25.5755	0.193849	0.378453	0.800869	0.942949	628.366	693.683	25.0672
AP1/1	opp	-19.5	655	639.711	706.428	26.5787	0.264908	0.400825	0.575244	0.968013	660.849	729.771	25.707
AP1/1	opp	-18.5	668	636.695	706.048	26.5716	0.104427	0.314171	1.17813	0.968013	657.734	729.378	25.6463
AP1/1	same	-18.5	594	579.694	641.009	25.3182	0.267874	0.400825	0.565053	0.942949	614.767	679.792	24.7945
AP1/1	same	-17.5	554	567.319	626.031	25.0206	0.296936	0.411879	-0.532338	0.942949	601.644	663.908	24.5284
AP1/1	opp	-17.5	625	630.385	695.317	26.3689	0.42538	0.48213	-0.204201	0.968013	651.215	718.293	25.5189
AP1/1	opp	-16.5	646	633.093	700.33	26.4638	0.295437	0.411879	0.487716	0.968013	654.013	723.472	25.5737
AP1/1	same	-16.5	573	584.055	646.788	25.432	0.333178	0.429737	-0.434688	0.942949	619.392	685.921	24.8876
AP1/1	opp	-15.5	588	640.233	704.571	26.5438	0.0193972	0.140404	-1.96779	0.968013	661.388	727.852	25.7175
AP1/1	same	-15.5	571	551.688	609.168	24.6813	0.198898	0.380117	0.782443	0.942949	585.067	646.025	24.1882
AP1/1	opp	-14.5	615	599.737	661.794	25.7253	0.258602	0.400825	0.593316	0.968013	619.554	683.662	24.8908
AP1/1	same	-14.5	550	554.044	610.749	24.7133	0.442887	0.48213	-0.163653	0.942949	587.566	647.701	24.2398
AP1/1	same	-13.5	559	573.427	632.899	25.1575	0.281976	0.400825	-0.573469	0.942949	608.121	671.192	24.6601
AP1/1	opp	-13.5	585	585.289	646.201	25.4205	0.506228	0.530922	-0.0113673	0.968013	604.629	667.554	24.5892
AP1/1	opp	-12.5	591	626.276	691.324	26.293	0.0813489	0.285551	-1.34164	0.968013	646.97	714.168	25.4356
AP1/1	same	-12.5	601	579.914	640.13	25.3008	0.184654	0.378453	0.833404	0.942949	615.001	678.86	24.7992
AP1/1	opp	-11.5	636	591.653	652.848	25.5509	0.0337806	0.171105	1.73563	0.968013	611.203	674.421	24.7225
AP1/1	same	-11.5	596	609.296	671.622	25.9157	0.303824	0.413121	-0.513036	0.942949	646.16	712.257	25.4197
AP1/1	opp	-10.5	620	603.893	667.928	25.8443	0.248422	0.400825	0.623218	0.968013	623.848	689.999	24.977
AP1/1	same	-10.5	594	605.133	669.354	25.8719	0.334795	0.429737	-0.4303	0.942949	641.745	709.852	25.3327
AP1/1	same	-9.5	605	567.596	628.683	25.0736	0.0569789	0.241912	1.49175	0.942949	601.938	666.721	24.5344
AP1/1	opp	-9.5	643	672.217	746.941	27.3302	0.133679	0.338129	-1.06905	0.968013	694.43	771.623	26.352
AP1/1	opp	-8.5	763	705.574	782.511	27.9734	0.0154613	0.132967	2.05288	0.968013	728.889	808.368	26.9979
AP1/1	same	-8.5	497	521.978	576.17	24.0035	0.14173	0.348251	-1.04059	0.942949	553.559	611.03	23.5278
AP1/1	same	-7.5	553	490.325	539.84	23.2345	0.00253782	0.085444	2.6975	0.942949	519.991	572.502	22.8033
AP1/1	opp	-7.5	827	762.652	845.555	29.0784	0.0101167	0.116005	2.21291	0.968013	787.853	873.495	28.0687
AP1/1	opp	-6.5	689	748.435	828.969	28.7918	0.0147284	0.132967	-2.0643	0.968013	773.166	856.361	27.8059
AP1/1	same	-6.5	526	480.749	526.894	22.9542	0.0195913	0.140404	1.97138	0.942949	509.835	558.772	22.5795
AP1/1	same	-5.5	496	547.08	613.936	24.7777	0.0142643	0.132967	-2.06155	0.942949	580.181	651.081	24.0869
AP1/1	opp	-5.5	642	592.351	642.438	25.3464	0.0207166	0.14253	1.95883	0.968013	611.924	663.666	24.7371
AP1/1	opp	-4.5	1010	953.682	1038.02	32.2183	0.033823	0.171105	1.748	0.968013	985.196	1072.32	31.3878
AP1/1	same	-4.5	345	333.786	363.9	19.0762	0.258962	0.400825	0.587859	0.942949	353.981	385.917	18.8144
AP1/1	same	-3.5	345	322.412	337.351	18.3671	0.100254	0.314171	1.22982	0.942949	341.919	357.762	18.491
AP1/1	opp	-3.5	0	0	0	0	1	1	0	0.968013	0	0	0
AP1/1	same	-2.5	51	52.8987	59.3086	7.70121	0.432466	0.48213	-0.246548	0.942949	56.0993	62.897	7.48994
AP1/1	opp	-2.5	0	0	0	0	1	1	0	0.968013	0	0	0
AP1/1	opp	-1.5	2357	2399.9	2689.84	51.8637	0.193638	0.378453	-0.827081	0.968013	2479.2	2778.73	49.7915
AP1/1	same	-1.5	0	0	0	0	1	1	0	0.942949	0	0	0
AP1/1	opp	-0.5	640	595.136	631.19	25.1235	0.0326374	0.171105	1.78573	0.968013	614.802	652.047	24.7952
AP1/1	same	-0.5	0	0	0	0	1	1	0	0.942949	0	0	0
AP1/1	same	0.5	477	428.357	453.906	21.3051	0.00966798	0.116005	2.28318	0.968348	448.237	474.972	21.1716
AP1/1	opp	0.5	0	0	0	0	1	1	0	0.948455	0	0	0
AP1/1	same	1.5	2172	2201.28	2453.44	49.5322	0.270507	0.400825	-0.591209	0.968348	2273.24	2533.63	47.6785
AP1/1	opp	1.5	0	0	0	0	1	1	0	0.948455	0	0	0
AP1/1	opp	2.5	9	8.89354	10.4055	3.22575	0.398568	0.476067	0.0330029	0.948455	9.37687	10.971	3.06217
AP1/1	same	2.5	0	0	0	0	1	1	0	0.968348	0	0	0
AP1/1	opp	3.5	329	297.278	310.686	17.6263	0.0324469	0.171105	1.79967	0.948455	313.434	327.571	17.7041
AP1/1	same	3.5	0	0	0	0	1	1	0	0.968348	0	0	0
AP1/1	same	4.5	1070	1002.6	1090.17	33.0177	0.0167468	0.137164	2.04138	0.968348	1035.37	1125.8	32.1772
AP1/1	opp	4.5	290	288.713	315.681	17.7674	0.454283	0.488355	0.0724191	0.948455	304.404	332.837	17.4472
AP1/1	same	5.5	683	612.297	663.368	25.7559	0.00232103	0.085444	2.7451	0.968348	632.311	685.05	25.1458
AP1/1	opp	5.5	489	515.399	578.143	24.0446	0.126487	0.330977	-1.09791	0.948455	543.409	609.563	23.3111
AP1/1	same	6.5	738	784.678	871.17	29.5156	0.0485504	0.219755	-1.58147	0.968348	810.326	899.645	28.4662
AP1/1	opp	6.5	522	488.911	535.811	23.1476	0.0655677	0.257582	1.42949	0.948455	515.481	564.931	22.7042
AP1/1	same	7.5	870	793.439	879.03	29.6484	0.00347737	0.085444	2.5823	0.968348	819.373	907.762	28.6247
AP1/1	opp	7.5	548	502.761	553.708	23.531	0.0218279	0.1444	1.92251	0.948455	530.085	583.8	23.0236
AP1/1	same	8.5	804	740.436	822.775	28.6841	0.00996664	0.116005	2.216	0.968348	764.638	849.669	27.6521
AP1/1	opp	8.5	502	523.972	578.315	24.0482	0.174328	0.370178	-0.913647	0.948455	552.447	609.744	23.5042
AP1/1	opp	9.5	610	560.741	620.362	24.9071	0.0188417	0.140404	1.97772	0.948455	591.215	654.077	24.3149
AP1/1	same	9.5	670	712.286	793.511	28.1693	0.0576209	0.241912	-1.50113	0.968348	735.568	819.448	27.1214
AP1/1	same	10.5	634	620.169	686.712	26.2052	0.280983	0.400825	0.527781	0.968348	640.44	709.158	25.3069
AP1/1	opp	10.5	605	596.376	659.396	25.6787	0.352173	0.448695	0.335825	0.948455	628.787	695.231	25.0756
AP1/1	same	11.5	635	604.526	667.129	25.8288	0.104568	0.314171	1.17984	0.968348	624.286	688.935	24.9857
AP1/1	opp	11.5	591	599.364	661.141	25.7127	0.376343	0.45958	-0.325288	0.948455	631.937	697.071	25.1384
AP1/1	same	12.5	589	631.126	696.579	26.3928	0.0475642	0.219755	-1.5961	0.968348	651.755	719.348	25.5295
AP1/1	opp	12.5	562	572.978	632.391	25.1474	0.332831	0.429737	-0.436562	0.948455	604.118	666.759	24.5788
AP1/1	opp	13.5	536	565.869	624.116	24.9823	0.107769	0.314171	-1.19562	0.948455	596.622	658.035	24.4259
AP1/1	same	13.5	604	601.453	663.738	25.7631	0.447912	0.484534	0.0988698	0.968348	621.112	685.433	24.9221
AP1/1	same	14.5	614	609.868	672.952	25.9413	0.423065	0.48213	0.159273	0.968348	629.802	694.948	25.0959
AP1/1	opp	14.5	556	552.444	609.237	24.6827	0.428791	0.48213	0.144083	0.948455	582.467	642.347	24.1343
AP1/1	same	15.5	614	644.665	709.375	26.6341	0.116846	0.324154	-1.15136	0.968348	665.737	732.562	25.8019
AP1/1	opp	15.5	562	555.869	613.885	24.7767	0.386761	0.465196	0.247469	0.948455	586.078	647.247	24.209
AP1/1	same	16.5	660	631.615	698.654	26.4321	0.125628	0.330977	1.07387	0.968348	652.26	721.49	25.5394
AP1/1	opp	16.5	561	575.581	636.697	25.2329	0.280164	0.400825	-0.577849	0.948455	606.861	671.299	24.6346
AP1/1	same	17.5	645	628.886	693.453	26.3335	0.252632	0.400825	0.611915	0.968348	649.442	716.119	25.4842
AP1/1	opp	17.5	565	569.536	628.043	25.0608	0.435519	0.48213	-0.181013	0.948455	600.488	662.175	24.5049
AP1/1	opp	18.5	589	571.91	631.382	25.1273	0.230028	0.399645	0.680145	0.948455	602.991	665.695	24.5559
AP1/1	same	18.5	648	637.753	707.274	26.5946	0.333256	0.429737	0.385287	0.968348	658.599	730.392	25.6632
AP1/1	opp	19.5	608	582.39	642.156	25.3408	0.139885	0.348251	1.01061	0.948455	614.041	677.054	24.7799
AP1/1	same	19.5	657	641.998	708.457	26.6169	0.26897	0.400825	0.563627	0.968348	662.982	731.614	25.7484
AP1/1	opp	20.5	595	574.104	633.485	25.1691	0.185551	0.378453	0.83021	0.948455	605.305	667.912	24.6029
AP1/1	same	20.5	618	636.11	703.95	26.5321	0.243579	0.400825	-0.682565	0.968348	656.902	726.96	25.6301
AP1/1	opp	21.5	558	601.174	665.031	25.7882	0.0396468	0.194836	-1.67418	0.948455	633.845	701.173	25.1763
AP1/1	same	21.5	655	630.289	695.793	26.3779	0.157634	0.356751	0.936825	0.968348	650.89	718.536	25.5125
AP1/1	same	22.5	591	624.89	689.55	26.2593	0.0899342	0.291862	-1.29059	0.968348	645.315	712.089	25.4031
AP1/1	opp	22.5	594	605.706	669.12	25.8674	0.32637	0.429737	-0.452553	0.948455	638.624	705.485	25.271
AP1/1	same	23.5	644	622.365	687.829	26.2265	0.187074	0.378453	0.824927	0.968348	642.708	710.311	25.3517
AP1/1	opp	23.5	587	594.957	656.649	25.6252	0.382276	0.463039	-0.310512	0.948455	627.291	692.335	25.0458
AP1/1	opp	24.5	547	594.696	657.215	25.6362	0.0252971	0.150038	-1.8605	0.948455	627.016	692.932	25.0403
AP1/1	same	24.5	600	600.78	663.042	25.7496	0.498163	0.527822	-0.0302739	0.968348	620.417	684.714	24.9082
AP1/1	opp	25.5	557	604.422	668.649	25.8582	0.0269759	0.154662	-1.83392	0.948455	637.27	704.988	25.2442
AP1/1	same	25.5	636	615.116	680.301	26.0826	0.193805	0.378453	0.800683	0.968348	635.222	702.537	25.2036
AP1/1	opp	26.5	582	595.063	656.405	25.6204	0.305037	0.413121	-0.509859	0.948455	627.402	692.079	25.048
AP1/1	same	26.5	617	613.82	679.487	26.067	0.438361	0.48213	0.12201	0.968348	633.883	701.696	25.177
AP1/1	same	27.5	643	631.631	698.733	26.4336	0.316532	0.422043	0.430109	0.968348	652.276	721.572	25.5397
AP1/1	opp	27.5	622	631.63	700.909	26.4747	0.360356	0.452418	-0.363741	0.948455	665.957	739.001	25.8061
AP1/1	same	28.5	648	617.876	683.569	26.1451	0.109595	0.314171	1.15219	0.968348	638.072	705.912	25.2601
AP1/1	opp	28.5	582	606.256	670.866	25.9011	0.167416	0.370178	-0.936504	0.948455	639.204	707.325	25.2825
AP1/1	same	29.5	635	614.314	678.866	26.0551	0.195827	0.378453	0.793932	0.968348	634.394	701.056	25.1872
AP1/1	opp	29.5	591	611.651	676.535	26.0103	0.208243	0.385138	-0.793941	0.948455	644.892	713.302	25.3947
AP1/1	opp	30.5	562	585.342	646.837	25.433	0.172734	0.370178	-0.91777	0.948455	617.153	681.99	24.8426
AP1/1	same	30.5	620	626.51	693.494	26.3343	0.407568	0.480499	-0.247189	0.968348	646.988	716.161	25.436
AP1/1	opp	31.5	536	583.305	644.536	25.3877	0.0251284	0.150038	-1.86329	0.948455	615.005	679.564	24.7993
AP1/1	same	31.5	634	617.945	683.036	26.135	0.251518	0.400825	0.614325	0.968348	638.143	705.362	25.2615
AP1/1	opp	32.5	550	607.553	671.64	25.916	0.00950084	0.116005	-2.22074	0.948455	640.571	708.141	25.3095
AP1/1	same	32.5	594	606.826	671.799	25.9191	0.310199	0.41683	-0.494847	0.968348	626.661	693.757	25.0332
AP1/1	same	33.5	667	599.118	661.875	25.7269	0.00298272	0.085444	2.63857	0.968348	618.7	683.509	24.8737
AP1/1	opp	33.5	668	632.174	699.466	26.4474	0.0752435	0.281345	1.3546	0.948455	666.531	737.479	25.8173
AP1/1	opp	34.5	570	590.425	650.598	25.5068	0.206736	0.385138	-0.800781	0.948455	622.513	685.956	24.9502
AP1/1	same	34.5	583	597.944	660.924	25.7084	0.278849	0.400825	-0.581307	0.968348	617.489	682.527	24.8493
AP1/1	same	35.5	649	600.654	663.554	25.7595	0.0242129	0.150038	1.87681	0.968348	620.287	685.243	24.9056
AP1/1	opp	35.5	583	599.162	661.76	25.7247	0.262442	0.400825	-0.628278	0.948455	631.724	697.725	25.1341
AP1/1	opp	36.5	602	617.597	683.61	26.1459	0.273165	0.400825	-0.596552	0.948455	651.161	720.761	25.5179
AP1/1	same	36.5	617	626.27	694.566	26.3546	0.365202	0.455179	-0.35174	0.968348	646.74	717.268	25.4311
AP1/1	same	37.5	664	605.907	671.139	25.9063	0.00938289	0.116005	2.24244	0.968348	625.711	693.076	25.0142
AP1/1	opp	37.5	578	597.669	660.236	25.6951	0.217258	0.393351	-0.765478	0.948455	630.15	696.117	25.1028
AP1/1	opp	38.5	588	613.934	678.711	26.0521	0.152227	0.356751	-0.99547	0.948455	647.299	715.597	25.4421
AP1/1	same	38.5	614	598.033	661.022	25.7103	0.249174	0.400825	0.621029	0.968348	617.58	682.628	24.8512
AP1/1	opp	39.5	582	615.822	681.092	26.0977	0.0887699	0.291862	-1.29596	0.948455	649.289	718.107	25.4812
AP1/1	same	39.5	599	629.047	696.025	26.3823	0.118844	0.324464	-1.13891	0.968348	649.608	718.776	25.4874
AP1/1	same	40.5	714	622.974	688.567	26.2406	0.000166085	0.024987	3.46892	0.968348	643.336	711.073	25.3641
AP1/1	opp	40.5	568	603.235	668.504	25.8554	0.0776151	0.282237	-1.36277	0.948455	636.019	704.834	25.2194
AP1/1	same	41.5	667	632.905	700.991	26.4762	0.0854321	0.291862	1.28774	0.968348	653.593	723.904	25.5655
AP1/1	opp	41.5	585	613.227	678.128	26.0409	0.131038	0.336395	-1.08396	0.948455	646.554	714.982	25.4274
AP1/1	opp	42.5	538	606.713	670.341	25.8909	0.00242443	0.085444	-2.65393	0.948455	639.685	706.771	25.292
AP1/1	same	42.5	639	608.891	672.772	25.9379	0.108046	0.314171	1.16083	0.968348	628.793	694.763	25.0757
AP1/1	same	43.5	666	609.189	673.649	25.9548	0.0109066	0.117246	2.18885	0.968348	629.101	695.668	25.0819
AP1/1	opp	43.5	574	609.217	674.294	25.9672	0.0787639	0.282237	-1.35623	0.948455	642.326	710.94	25.3442
AP1/2	same	-42.5	393	412.632	456.976	21.377	0.173356	0.37677	-0.918361	0.968933	425.862	471.628	20.6364
AP1/2	opp	-42.5	420	413.474	456.413	21.3638	0.362149	0.455273	0.305458	1.03478	399.576	441.071	19.9894
AP1/2	same	-41.5	373	389.991	431.376	20.7696	0.202552	0.390447	-0.818058	0.968933	402.495	445.208	20.0623
AP1/2	opp	-41.5	394	411.437	454.331	21.315	0.202553	0.390447	-0.81805	1.03478	397.607	439.059	19.9401
AP1/2	opp	-40.5	445	421.86	466.437	21.5971	0.12538	0.355621	1.07144	1.03478	407.68	450.758	20.1911
AP1/2	same	-40.5	387	378.293	417.322	20.4285	0.315619	0.436105	0.426196	0.968933	390.423	430.703	19.7591
AP1/2	opp	-39.5	417	418.758	462.104	21.4966	0.478725	0.493485	-0.0817805	1.03478	404.682	446.571	20.1167
AP1/2	same	-39.5	388	388.908	429.92	20.7345	0.495124	0.500815	-0.0437784	0.968933	401.377	443.704	20.0344
AP1/2	same	-38.5	356	372.363	411.754	20.2917	0.206316	0.390447	-0.806363	0.968933	384.302	424.956	19.6036
AP1/2	opp	-38.5	427	415.451	457.8	21.3963	0.27544	0.436105	0.539751	1.03478	401.486	442.412	20.0371
AP1/2	opp	-37.5	456	432.305	477.82	21.8591	0.122815	0.355621	1.08401	1.03478	417.773	461.759	20.4395
AP1/2	same	-37.5	368	382.017	421.755	20.5367	0.245996	0.432841	-0.682544	0.968933	394.266	435.278	19.8561
AP1/2	opp	-36.5	436	409.865	451.948	21.2591	0.0951175	0.334259	1.22935	1.03478	396.088	436.757	19.902
AP1/2	same	-36.5	392	397.941	440.179	20.9804	0.395497	0.467033	-0.283187	0.968933	410.701	454.293	20.2658
AP1/2	opp	-35.5	418	403.304	444.931	21.0934	0.223553	0.407964	0.696709	1.03478	389.748	429.975	19.742
AP1/2	same	-35.5	389	379.525	418.38	20.4543	0.302116	0.436105	0.463224	0.968933	391.694	431.795	19.7913
AP1/2	opp	-34.5	443	416.408	460.235	21.4531	0.0931296	0.334259	1.23956	1.03478	402.411	444.765	20.0602
AP1/2	same	-34.5	373	383.147	422.891	20.5643	0.31334	0.436105	-0.493451	0.968933	395.433	436.451	19.8855
AP1/2	opp	-33.5	405	400.091	441.964	21.0229	0.390448	0.467033	0.233528	1.03478	386.642	427.108	19.6632
AP1/2	same	-33.5	393	392.01	433.149	20.8122	0.466685	0.488972	0.0475522	0.968933	404.58	447.037	20.1142
AP1/2	opp	-32.5	409	398.716	440.515	20.9885	0.292543	0.436105	0.489982	1.03478	385.314	425.708	19.6294
AP1/2	same	-32.5	405	395.111	435.251	20.8627	0.298499	0.436105	0.47399	0.968933	407.78	449.206	20.1936
AP1/2	opp	-31.5	452	404.545	446.742	21.1363	0.00945053	0.187346	2.24521	1.03478	390.946	431.726	19.7724
AP1/2	same	-31.5	405	403.521	445.771	21.1133	0.457497	0.488972	0.0700616	0.968933	416.459	460.064	20.4073
AP1/2	opp	-30.5	458	415.036	458.704	21.4174	0.0176109	0.216395	2.00602	1.03478	401.085	443.285	20.0271
AP1/2	same	-30.5	388	400.828	442.275	21.0303	0.270729	0.436105	-0.609994	0.968933	413.68	456.455	20.3391
AP1/2	opp	-29.5	397	410.544	453.154	21.2874	0.261429	0.436105	-0.636239	1.03478	396.744	437.921	19.9184
AP1/2	same	-29.5	378	382.776	421.677	20.5348	0.416671	0.467033	-0.23257	0.968933	395.049	435.198	19.8758
AP1/2	same	-28.5	376	386.506	426.654	20.6556	0.307592	0.436105	-0.508651	0.968933	398.899	440.334	19.9725
AP1/2	opp	-28.5	407	414.592	457.75	21.3951	0.366513	0.457491	-0.354857	1.03478	400.656	442.364	20.0164
AP1/2	same	-27.5	402	394.723	436.215	20.8858	0.345117	0.441921	0.348427	0.968933	407.379	450.202	20.1836
AP1/2	opp	-27.5	412	417.471	460.913	21.4689	0.406875	0.467033	-0.254822	1.03478	403.438	445.42	20.0858
AP1/2	opp	-26.5	396	408.518	450.608	21.2275	0.277835	0.436105	-0.589726	1.03478	394.787	435.461	19.8692
AP1/2	same	-26.5	381	385.922	426.546	20.653	0.414097	0.467033	-0.238311	0.968933	398.296	440.223	19.9574
AP1/2	opp	-25.5	382	410.39	452.359	21.2687	0.0831087	0.325047	-1.33482	1.03478	396.595	437.153	19.9147
AP1/2	same	-25.5	364	389.535	430.031	20.7372	0.101352	0.334259	-1.23137	0.968933	402.025	443.82	20.0506
AP1/2	opp	-24.5	426	415.689	459.378	21.4331	0.295933	0.436105	0.481092	1.03478	401.716	443.937	20.0429
AP1/2	same	-24.5	376	375.423	413.764	20.3412	0.474431	0.493485	0.0283436	0.968933	387.461	427.03	19.684
AP1/2	opp	-23.5	438	417.052	460.864	21.4677	0.146971	0.369527	0.975776	1.03478	403.034	445.373	20.0757
AP1/2	same	-23.5	366	371.576	409.221	20.2292	0.399261	0.467033	-0.275638	0.968933	383.49	422.342	19.5829
AP1/2	same	-22.5	380	388.931	428.843	20.7085	0.337023	0.436148	-0.431291	0.968933	401.402	442.593	20.035
AP1/2	opp	-22.5	401	405.184	446.134	21.1219	0.430539	0.474751	-0.19809	1.03478	391.564	431.138	19.788
AP1/2	same	-21.5	410	373.512	410.731	20.2665	0.0292476	0.232331	1.80039	0.968933	385.489	423.9	19.6339
AP1/2	opp	-21.5	434	415.357	457.664	21.3931	0.173519	0.37677	0.87147	1.03478	401.395	442.281	20.0348
AP1/2	opp	-20.5	366	406.909	448.275	21.1725	0.0212086	0.232331	-1.93216	1.03478	393.231	433.207	19.83
AP1/2	same	-20.5	388	385.937	425.389	20.625	0.444806	0.483246	0.100022	0.968933	398.312	439.028	19.9577
AP1/2	same	-19.5	354	386.852	426.309	20.6473	0.0484546	0.29514	-1.59111	0.968933	399.256	439.978	19.9814
AP1/2	opp	-19.5	404	403.773	445.257	21.1011	0.482269	0.493485	0.0107535	1.03478	390.201	430.29	19.7535
AP1/2	same	-18.5	390	380.43	419.256	20.4757	0.300639	0.436105	0.467401	0.968933	392.628	432.698	19.8148
AP1/2	opp	-18.5	412	417.806	461.397	21.4802	0.400543	0.467033	-0.270275	1.03478	403.762	445.888	20.0938
AP1/2	same	-17.5	418	396.094	436.352	20.889	0.130562	0.359045	1.04868	0.968933	408.794	450.343	20.2187
AP1/2	opp	-17.5	417	415.964	458.067	21.4025	0.466746	0.488972	0.0484215	1.03478	401.982	442.67	20.0495
AP1/2	opp	-16.5	435	416.694	461.532	21.4833	0.178112	0.377684	0.852112	1.03478	402.687	446.018	20.0671
AP1/2	same	-16.5	398	381.807	421.417	20.5285	0.195809	0.390447	0.788831	0.968933	394.049	434.93	19.8507
AP1/2	same	-15.5	315	359.889	396.607	19.915	0.00861726	0.187346	-2.25405	0.968933	371.429	409.324	19.2725
AP1/2	opp	-15.5	378	424.259	467.212	21.6151	0.0120606	0.19297	-2.14014	1.03478	409.998	451.508	20.2484
AP1/2	same	-14.5	394	375.91	416.094	20.3984	0.168627	0.37677	0.886834	0.968933	387.963	429.435	19.6968
AP1/2	opp	-14.5	422	420.21	464.13	21.5437	0.452344	0.48842	0.0830917	1.03478	406.085	448.529	20.1516
AP1/2	opp	-13.5	392	410.143	451	21.2368	0.192353	0.390447	-0.854335	1.03478	396.357	435.84	19.9087
AP1/2	same	-13.5	350	358.08	394.373	19.8588	0.347094	0.441921	-0.406895	0.968933	369.562	407.018	19.224
AP1/2	same	-12.5	348	359.579	396.055	19.9011	0.28148	0.436105	-0.581818	0.968933	371.108	408.754	19.2642
AP1/2	opp	-12.5	394	385.847	424.745	20.6093	0.327324	0.436105	0.395575	1.03478	372.878	410.468	19.31
AP1/2	opp	-11.5	413	382.815	422.787	20.5618	0.0597989	0.312826	1.46804	1.03478	369.947	408.576	19.234
AP1/2	same	-11.5	427	396.867	436.523	20.8931	0.0634107	0.312826	1.44223	0.968933	409.592	450.52	20.2384
AP1/2	same	-10.5	363	386.111	425.243	20.6214	0.124319	0.355621	-1.12074	0.968933	398.491	438.878	19.9622
AP1/2	opp	-10.5	415	409.299	450.846	21.2331	0.376779	0.463728	0.268488	1.03478	395.541	435.692	19.8882
AP1/2	opp	-9.5	428	409.392	450.263	21.2194	0.172245	0.37677	0.876919	1.03478	395.631	435.128	19.8905
AP1/2	same	-9.5	363	375.182	413.284	20.3294	0.275037	0.436105	-0.599252	0.968933	387.212	426.535	19.6777
AP1/2	opp	-8.5	440	412.544	454.491	21.3188	0.0854394	0.326898	1.28788	1.03478	398.677	439.214	19.9669
AP1/2	same	-8.5	390	385.429	425.921	20.6379	0.395044	0.467033	0.221476	0.968933	397.787	439.578	19.9446
AP1/2	opp	-7.5	381	425.226	470.291	21.6862	0.0157697	0.213497	-2.03934	1.03478	410.932	454.483	20.2715
AP1/2	same	-7.5	428	390.64	431.437	20.7711	0.0291049	0.232331	1.79868	0.968933	403.165	445.271	20.079
AP1/2	opp	-6.5	469	420.718	464.048	21.5418	0.00958017	0.187346	2.24132	1.03478	406.576	448.45	20.1637
AP1/2	same	-6.5	351	383.057	424.075	20.5931	0.0519025	0.299964	-1.5567	0.968933	395.339	437.673	19.8831
AP1/2	same	-5.5	384	356.571	390.907	19.7714	0.0709071	0.312826	1.38731	0.968933	368.004	403.441	19.1834
AP1/2	opp	-5.5	517	533.282	595.582	24.4046	0.248392	0.432841	-0.667159	1.03478	515.356	575.563	22.7015
AP1/2	same	-4.5	406	377.764	409.729	20.2418	0.0709441	0.312826	1.39495	0.968933	389.876	422.866	19.7453
AP1/2	opp	-4.5	394	379.186	418.931	20.4678	0.214838	0.40225	0.723783	1.03478	366.44	404.849	19.1426
AP1/2	opp	-3.5	263	238.865	250.378	15.8233	0.05725	0.312826	1.52528	1.03478	230.836	241.962	15.1933
AP1/2	same	-3.5	212	235.636	262.404	16.1989	0.0640244	0.312826	-1.45908	0.968933	243.191	270.818	15.5946
AP1/2	opp	-2.5	340	300.046	324.309	18.0086	0.0108629	0.191188	2.21861	1.03478	289.96	313.408	17.0282
AP1/2	same	-2.5	246	256.247	278.442	16.6866	0.273471	0.436105	-0.614102	0.968933	264.463	287.37	16.2623
AP1/2	opp	-1.5	0	1.80984	1.91781	1.38485	0.16368	0.37677	-1.30689	1.03478	1.74901	1.85334	1.3225
AP1/2	same	-1.5	399	412.809	429.027	20.713	0.257731	0.436105	-0.666676	0.968933	426.045	442.783	20.6409
AP1/2	opp	-0.5	49	57.6708	62.2172	7.88778	0.139978	0.369527	-1.09927	1.03478	55.7323	60.1258	7.46541
AP1/2	same	-0.5	176	183.455	213.98	14.628	0.306996	0.436105	-0.509627	0.968933	189.337	220.841	13.76
AP1/2	same	0.5	12	20.8069	23.1442	4.81084	0.0268933	0.232331	-1.83063	1.02011	20.9215	23.2717	4.574
AP1/2	opp	0.5	1412	1455.92	1627.81	40.3461	0.127296	0.355621	-1.08856	0.967809	1454.03	1625.7	38.1318
AP1/2	same	1.5	13	17.652	18.6118	4.31414	0.161189	0.37677	-1.07832	1.02011	17.3041	18.245	4.15982
AP1/2	opp	1.5	479	469.993	499.761	22.3553	0.328263	0.436105	0.402891	0.967809	485.626	516.384	22.0369
AP1/2	opp	2.5	41	66.2249	69.2311	8.32052	0.00059208	0.0428395	-3.03165	0.967809	68.4276	71.5338	8.2721
AP1/2	same	2.5	175	193.331	205.284	14.3277	0.098401	0.334259	-1.2794	1.02011	189.52	201.238	13.7666
AP1/2	same	3.5	1022	1086.51	1199.04	34.6271	0.0252136	0.232331	-1.86295	1.02011	1065.09	1175.4	32.6358
AP1/2	opp	3.5	2	3.04025	3.45507	1.85878	0.414233	0.467033	-0.559642	0.967809	3.14138	3.56999	1.77239
AP1/2	same	4.5	60	71.6703	76.8038	8.76378	0.0907925	0.332906	-1.33165	1.02011	70.2577	75.29	8.38198
AP1/2	opp	4.5	59	52.6379	60.7093	7.79162	0.171348	0.37677	0.81653	0.967809	54.3887	62.7286	7.37487
AP1/2	opp	5.5	216	195.714	205.867	14.3481	0.0704659	0.312826	1.41386	0.967809	202.224	212.714	14.2205
AP1/2	same	5.5	59	69.0256	74.5948	8.63683	0.124259	0.355621	-1.1608	1.02011	67.6651	73.1246	8.22588
AP1/2	opp	6.5	229	193.965	209.435	14.4719	0.00637549	0.187014	2.42092	0.967809	200.416	216.401	14.1568
AP1/2	same	6.5	617	591.846	644.469	25.3864	0.145982	0.369527	0.990839	1.02011	580.181	631.767	24.0869
AP1/2	same	7.5	410	367.534	398.853	19.9713	0.0136199	0.199758	2.12637	1.02011	360.29	390.992	18.9813
AP1/2	opp	7.5	336	364.887	406.486	20.1615	0.0671769	0.312826	-1.43278	0.967809	377.024	420.006	19.4171
AP1/2	same	8.5	423	439.492	483.659	21.9922	0.223764	0.407964	-0.749918	1.02011	430.83	474.126	20.7564
AP1/2	opp	8.5	322	312.787	342.806	18.515	0.289176	0.436105	0.497616	0.967809	323.19	354.208	17.9775
AP1/2	same	9.5	545	473.573	524.252	22.8965	0.000610526	0.0428395	3.11956	1.02011	464.239	513.919	21.5462
AP1/2	opp	9.5	350	338.504	371.769	19.2813	0.255524	0.436105	0.596207	0.967809	349.764	384.135	18.702
AP1/2	same	10.5	455	429.029	475.333	21.8021	0.10148	0.334259	1.19124	1.02011	420.572	465.965	20.5079
AP1/2	opp	10.5	344	362.268	399.238	19.9809	0.175541	0.37677	-0.914286	0.967809	374.318	412.517	19.3473
AP1/2	opp	11.5	410	377.974	417.747	20.4389	0.048631	0.29514	1.5669	0.967809	390.546	431.642	19.7622
AP1/2	same	11.5	385	406.967	450.862	21.2335	0.143361	0.369527	-1.03453	1.02011	398.945	441.976	19.9736
AP1/2	same	12.5	436	399.377	440.444	20.9868	0.0330243	0.242178	1.74505	1.02011	391.505	431.763	19.7865
AP1/2	opp	12.5	380	395.606	437.203	20.9094	0.224844	0.407964	-0.746342	0.967809	408.764	451.745	20.2179
AP1/2	opp	13.5	407	388.505	427.772	20.6827	0.167425	0.37677	0.894227	0.967809	401.427	442.001	20.0357
AP1/2	same	13.5	399	391.069	431.16	20.7644	0.332436	0.436105	0.381932	1.02011	383.361	422.662	19.5796
AP1/2	opp	14.5	342	376.561	414.568	20.3609	0.0380304	0.247902	-1.69739	0.967809	389.086	428.357	19.7253
AP1/2	same	14.5	413	413.574	457.463	21.3884	0.501825	0.501825	-0.0268229	1.02011	405.422	448.446	20.1351
AP1/2	opp	15.5	416	378.897	418.121	20.448	0.0280966	0.232331	1.81451	0.967809	391.5	432.028	19.7863
AP1/2	same	15.5	400	409.911	452.754	21.278	0.323352	0.436105	-0.465776	1.02011	401.831	443.83	20.0457
AP1/2	same	16.5	409	412.945	454.576	21.3208	0.435831	0.476437	-0.185028	1.02011	404.806	445.616	20.1198
AP1/2	opp	16.5	364	365.555	402.535	20.0633	0.481461	0.493485	-0.0775096	0.967809	377.714	415.923	19.4349
AP1/2	same	17.5	379	415.655	457.379	21.3864	0.0365841	0.247902	-1.71395	1.02011	407.463	448.364	20.1857
AP1/2	opp	17.5	343	359.102	395.393	19.8845	0.205955	0.390447	-0.809779	0.967809	371.046	408.545	19.2626
AP1/2	opp	18.5	409	384.554	425.084	20.6176	0.102557	0.334259	1.18569	0.967809	397.345	439.223	19.9335
AP1/2	same	18.5	377	396.606	437.751	20.9225	0.168835	0.37677	-0.937058	1.02011	388.788	429.123	19.7177
AP1/2	same	19.5	410	387.991	427.088	20.6661	0.12707	0.355621	1.065	1.02011	380.343	418.67	19.5024
AP1/2	opp	19.5	371	375.609	413.565	20.3363	0.419268	0.467033	-0.226621	0.967809	388.102	427.321	19.7003
AP1/2	same	20.5	427	398.783	440.348	20.9845	0.076429	0.312826	1.34464	1.02011	390.923	431.668	19.7718
AP1/2	opp	20.5	395	374.001	411.852	20.2941	0.13354	0.361587	1.03472	0.967809	386.441	425.551	19.6581
AP1/2	opp	21.5	372	381.368	420.017	20.4943	0.327335	0.436105	-0.457078	0.967809	394.052	433.988	19.8508
AP1/2	same	21.5	415	420.563	463.277	21.5239	0.405458	0.467033	-0.258467	1.02011	412.274	454.146	20.3045
AP1/2	same	22.5	415	406.437	449.466	21.2006	0.324152	0.436105	0.403892	1.02011	398.426	440.607	19.9606
AP1/2	opp	22.5	374	370.324	408.343	20.2075	0.410889	0.467033	0.181924	0.967809	382.641	421.925	19.5612
AP1/2	opp	23.5	366	385.125	425.526	20.6283	0.171484	0.37677	-0.927137	0.967809	397.935	439.68	19.9483
AP1/2	same	23.5	413	402.33	444.253	21.0773	0.286847	0.436105	0.506243	1.02011	394.4	435.497	19.8595
AP1/2	same	24.5	360	401.764	441.845	21.0201	0.0184428	0.216395	-1.98685	1.02011	393.845	433.136	19.8455
AP1/2	opp	24.5	376	393.552	434.048	20.8338	0.195613	0.390447	-0.842462	0.967809	406.642	448.485	20.1654
AP1/2	opp	25.5	426	389.092	427.786	20.683	0.0303614	0.232331	1.78444	0.967809	402.034	442.015	20.0508
AP1/2	same	25.5	414	405.871	447.671	21.1582	0.33176	0.436105	0.384199	1.02011	397.871	438.847	19.9467
AP1/2	same	26.5	420	402.601	443.657	21.0632	0.18571	0.384528	0.826045	1.02011	394.666	434.913	19.8662
AP1/2	opp	26.5	387	397.696	438.263	20.9347	0.306753	0.436105	-0.510911	0.967809	410.924	452.841	20.2713
AP1/2	opp	27.5	383	379.235	417.953	20.4439	0.410159	0.467033	0.184152	0.967809	391.849	431.855	19.7952
AP1/2	same	27.5	400	400.658	442.427	21.0339	0.500176	0.501825	-0.0312762	1.02011	392.761	433.707	19.8182
AP1/2	same	28.5	422	403.27	445.42	21.105	0.168942	0.37677	0.887455	1.02011	395.322	436.64	19.8827
AP1/2	opp	28.5	381	385.043	423.802	20.5864	0.431592	0.474751	-0.196388	0.967809	397.85	437.898	19.9462
AP1/2	same	29.5	370	399.288	442.1	21.0262	0.073515	0.312826	-1.39294	1.02011	391.418	433.387	19.7843
AP1/2	opp	29.5	410	393.871	435.507	20.8688	0.20033	0.390447	0.772877	0.967809	406.972	449.993	20.1735
AP1/2	opp	30.5	403	394.321	436.401	20.8902	0.319602	0.436105	0.415441	0.967809	407.437	450.916	20.1851
AP1/2	same	30.5	398	399.304	441.165	21.0039	0.487278	0.495728	-0.0620752	1.02011	391.434	432.469	19.7847
AP1/2	same	31.5	412	398.943	439.728	20.9697	0.247218	0.432841	0.622674	1.02011	391.08	431.061	19.7757
AP1/2	opp	31.5	403	393.479	433.68	20.825	0.304521	0.436105	0.457201	0.967809	406.567	448.104	20.1635
AP1/2	same	32.5	387	412.08	455.291	21.3376	0.112206	0.355621	-1.17537	1.02011	403.957	446.317	20.0987
AP1/2	opp	32.5	368	383.092	422.935	20.5654	0.229113	0.411469	-0.733862	0.967809	395.834	437.002	19.8956
AP1/2	opp	33.5	360	371.915	409.702	20.2411	0.27885	0.436105	-0.588632	0.967809	384.285	423.329	19.6032
AP1/2	same	33.5	400	402.389	444.246	21.0771	0.46576	0.488972	-0.113351	1.02011	394.458	435.49	19.861
AP1/2	same	34.5	425	396.487	437.618	20.9193	0.0737933	0.312826	1.36302	1.02011	388.672	428.992	19.7148
AP1/2	opp	34.5	361	387.716	427.609	20.6787	0.0904058	0.332906	-1.29194	0.967809	400.612	441.832	20.0153
AP1/2	same	35.5	455	400.071	441.866	21.0206	0.00327598	0.144143	2.6131	1.02011	392.186	433.157	19.8037
AP1/2	opp	35.5	425	393.154	433.763	20.827	0.0528346	0.299964	1.52906	0.967809	406.231	448.191	20.1552
AP1/2	opp	36.5	403	376.302	414.581	20.3613	0.0816341	0.325047	1.31122	0.967809	388.818	428.371	19.7185
AP1/2	same	36.5	374	398.449	438.437	20.9389	0.114363	0.355621	-1.16761	1.02011	390.595	429.795	19.7635
AP1/2	same	37.5	416	398.461	437.992	20.9283	0.182651	0.382696	0.838075	1.02011	390.607	429.359	19.7638
AP1/2	opp	37.5	374	380.214	420.381	20.5032	0.387749	0.467033	-0.30306	0.967809	392.86	434.363	19.8207
AP1/2	opp	38.5	398	389.91	430.913	20.7584	0.329302	0.436105	0.389711	0.967809	402.879	445.245	20.0719
AP1/2	same	38.5	403	410.164	452.586	21.2741	0.373852	0.463365	-0.33673	1.02011	402.079	443.665	20.0519
AP1/2	same	39.5	452	388.294	428.762	20.7066	0.000730219	0.0428395	3.07659	1.02011	380.641	420.311	19.51
AP1/2	opp	39.5	367	388.631	428.358	20.6968	0.141574	0.369527	-1.04511	0.967809	401.557	442.606	20.0389
AP1/2	same	40.5	420	381.499	420.91	20.5161	0.0242746	0.232331	1.87663	1.02011	373.979	412.614	19.3385
AP1/2	opp	40.5	385	393.336	434.214	20.8378	0.349017	0.441921	-0.400024	0.967809	406.419	448.656	20.1598
AP1/2	opp	41.5	382	387.284	427.053	20.6653	0.407064	0.467033	-0.25569	0.967809	400.166	441.257	20.0041
AP1/2	same	41.5	399	397.841	438.877	20.9494	0.463551	0.488972	0.0553448	1.02011	389.999	430.226	19.7484
AP1/2	same	42.5	457	406.054	447.788	21.161	0.0060378	0.187014	2.40756	1.02011	398.05	438.962	19.9512
AP1/2	opp	42.5	374	383.002	423.325	20.5749	0.334512	0.436105	-0.43751	0.967809	395.741	437.405	19.8932
AP1/2	same	43.5	444	415.013	458.618	21.4154	0.0750941	0.312826	1.35355	1.02011	406.833	449.579	20.1701
AP1/2	opp	43.5	386	397.613	439.149	20.9559	0.290632	0.436105	-0.554161	0.967809	410.838	453.756	20.2691
AP1/2	opp	44.5	361	396.687	437.618	20.9193	0.037107	0.247902	-1.70591	0.967809	409.881	452.174	20.2455
AP1/2	same	44.5	378	401.789	442.39	21.0331	0.122021	0.355621	-1.13102	1.02011	393.869	433.67	19.8461
BATF	opp	-44.5	164	132.785	146.672	12.1108	0.00383476	0.117512	2.57743	0.931292	142.582	157.493	11.9408
BATF	same	-44.5	119	123.651	137.087	11.7084	0.359306	0.463816	-0.397226	0.919337	134.5	149.115	11.5974
BATF	same	-43.5	134	119.68	132.742	11.5214	0.0896387	0.347782	1.24287	0.919337	130.181	144.389	11.4097
BATF	opp	-43.5	147	133.215	148.101	12.1697	0.109218	0.372152	1.13274	0.931292	143.043	159.028	11.9601
BATF	opp	-42.5	134	129.823	143.928	11.997	0.33628	0.448373	0.3482	0.931292	139.401	154.547	11.8068
BATF	same	-42.5	117	120.75	133.586	11.558	0.389032	0.480416	-0.324444	0.919337	131.345	145.307	11.4606
BATF	same	-41.5	131	122.534	135.931	11.659	0.20747	0.443889	0.726096	0.919337	133.286	147.858	11.5449
BATF	opp	-41.5	117	116.627	128.401	11.3314	0.461712	0.495454	0.0328742	0.931292	125.232	137.874	11.1907
BATF	same	-40.5	135	120.103	132.325	11.5033	0.082055	0.347782	1.29506	0.919337	130.64	143.936	11.4298
BATF	opp	-40.5	132	125.521	138.693	11.7768	0.263678	0.447315	0.55016	0.931292	134.781	148.926	11.6095
BATF	opp	-39.5	154	127.505	141.689	11.9033	0.00997518	0.203937	2.22585	0.931292	136.912	152.142	11.7009
BATF	same	-39.5	121	120.678	132.71	11.52	0.464179	0.495454	0.0279498	0.919337	131.266	144.354	11.4572
BATF	opp	-38.5	146	123.871	137.347	11.7195	0.0232885	0.267818	1.8882	0.931292	133.01	147.481	11.533
BATF	same	-38.5	136	128.367	142.096	11.9204	0.234223	0.447315	0.640321	0.919337	139.63	154.564	11.8165
BATF	same	-37.5	119	126.117	139.816	11.8244	0.28114	0.447315	-0.601857	0.919337	137.182	152.083	11.7125
BATF	opp	-37.5	126	121.692	134.754	11.6084	0.327069	0.447315	0.371088	0.931292	130.67	144.696	11.4311
BATF	same	-36.5	96	126.236	139.658	11.8177	0.00300931	0.117512	-2.55852	0.919337	137.312	151.912	11.718
BATF	opp	-36.5	139	119.01	131.252	11.4565	0.0326828	0.280586	1.74485	0.931292	127.79	140.935	11.3044
BATF	same	-35.5	104	126.713	140.768	11.8646	0.0216722	0.267818	-1.91438	0.919337	137.831	153.119	11.7402
BATF	opp	-35.5	141	128.526	142.603	11.9417	0.127065	0.395354	1.04456	0.931292	138.008	153.124	11.7477
BATF	opp	-34.5	136	125.741	139.674	11.8184	0.168298	0.399634	0.868042	0.931292	135.018	149.979	11.6197
BATF	same	-34.5	114	122.679	135.187	11.627	0.232194	0.447315	-0.746449	0.919337	133.443	147.048	11.5517
BATF	same	-33.5	106	124.909	138.202	11.7559	0.0469684	0.341802	-1.60846	0.919337	135.868	150.327	11.6563
BATF	opp	-33.5	127	121.418	134.63	11.603	0.286892	0.447315	0.48111	0.931292	130.375	144.562	11.4182
BATF	same	-32.5	112	124.746	138.651	11.775	0.135674	0.395354	-1.08248	0.919337	135.691	150.816	11.6487
BATF	opp	-32.5	134	128.247	142.152	11.9228	0.286936	0.447315	0.482508	0.931292	137.709	152.64	11.7349
BATF	opp	-31.5	133	117.542	129.745	11.3906	0.0727724	0.347782	1.35712	0.931292	126.214	139.317	11.2345
BATF	same	-31.5	108	121.479	133.761	11.5655	0.118176	0.380991	-1.16548	0.919337	132.138	145.497	11.4951
BATF	same	-30.5	112	128.234	141.624	11.9006	0.0801109	0.347782	-1.36411	0.919337	139.485	154.05	11.8104
BATF	opp	-30.5	131	119.939	132.675	11.5184	0.145866	0.395354	0.960293	0.931292	128.788	142.463	11.3485
BATF	same	-29.5	114	129.441	143.515	11.9798	0.092616	0.347782	-1.2889	0.919337	140.798	156.107	11.8658
BATF	opp	-29.5	123	118.633	130.637	11.4297	0.323093	0.447315	0.382086	0.931292	127.385	140.275	11.2865
BATF	opp	-28.5	128	119.272	132.041	11.4909	0.197797	0.43327	0.759582	0.931292	128.071	141.782	11.3169
BATF	same	-28.5	131	127.611	141.229	11.884	0.360466	0.463816	0.285157	0.919337	138.808	153.62	11.7817
BATF	opp	-27.5	147	124.02	137.072	11.7078	0.0196443	0.267818	1.96279	0.931292	133.17	147.184	11.5399
BATF	same	-27.5	137	131.101	145.09	12.0453	0.284732	0.447315	0.489711	0.919337	142.604	157.82	11.9417
BATF	opp	-26.5	136	121.313	134.048	11.5779	0.0859102	0.347782	1.26858	0.931292	130.263	143.938	11.4133
BATF	same	-26.5	130	125.648	138.951	11.7877	0.328193	0.447315	0.369203	0.919337	136.672	151.142	11.6907
BATF	opp	-25.5	129	123.348	136.383	11.6783	0.28626	0.447315	0.484007	0.931292	132.448	146.445	11.5086
BATF	same	-25.5	118	121.8	134.581	11.6009	0.387756	0.480416	-0.327541	0.919337	132.487	146.389	11.5103
BATF	same	-24.5	141	126.626	140.096	11.8362	0.0948098	0.3489	1.21445	0.919337	137.736	152.388	11.7361
BATF	opp	-24.5	129	122.812	135.521	11.6414	0.269924	0.447315	0.531535	0.931292	131.873	145.52	11.4836
BATF	opp	-23.5	126	120.619	133.207	11.5415	0.292441	0.447315	0.466215	0.931292	129.518	143.035	11.3806
BATF	same	-23.5	124	124.839	137.944	11.745	0.49385	0.516298	-0.0714335	0.919337	135.792	150.048	11.653
BATF	opp	-22.5	153	122.469	135.196	11.6274	0.00335319	0.117512	2.62577	0.931292	131.505	145.17	11.4675
BATF	same	-22.5	129	124.34	138.335	11.7616	0.317576	0.447315	0.396231	0.919337	135.249	150.473	11.6297
BATF	opp	-21.5	113	131.385	145.736	12.0721	0.0567093	0.341802	-1.52295	0.931292	141.078	156.488	11.8776
BATF	same	-21.5	135	122.184	135.341	11.6336	0.115346	0.378995	1.10166	0.919337	132.904	147.216	11.5284
BATF	same	-20.5	99	114.809	126.81	11.261	0.0740246	0.347782	-1.40385	0.919337	124.882	137.936	11.1751
BATF	opp	-20.5	120	123.813	137.257	11.7157	0.388207	0.480416	-0.325436	0.931292	132.947	147.384	11.5303
BATF	same	-19.5	109	120.204	132.501	11.5109	0.164554	0.399634	-0.973341	0.919337	130.751	144.126	11.4346
BATF	opp	-19.5	121	126.009	139.511	11.8115	0.348563	0.454862	-0.424122	0.931292	135.306	149.803	11.6321
BATF	same	-18.5	104	116.069	128.383	11.3306	0.140803	0.395354	-1.06518	0.919337	126.253	139.647	11.2362
BATF	opp	-18.5	124	122.863	135.284	11.6312	0.435495	0.491296	0.0977783	0.931292	131.927	145.265	11.486
BATF	same	-17.5	124	122.026	134.739	11.6077	0.405825	0.48956	0.170093	0.919337	132.732	146.561	11.5209
BATF	opp	-17.5	121	121.483	133.905	11.5717	0.506648	0.526685	-0.0417525	0.931292	130.446	143.784	11.4213
BATF	same	-16.5	151	138.188	153.405	12.3857	0.129474	0.395354	1.0344	0.919337	150.313	166.865	12.2602
BATF	opp	-16.5	123	118.888	130.637	11.4297	0.331597	0.448373	0.359781	0.931292	127.659	140.275	11.2986
BATF	same	-15.5	124	136.399	152.193	12.3367	0.15394	0.398943	-1.00502	0.919337	148.366	165.547	12.1806
BATF	opp	-15.5	123	121.751	134.925	11.6157	0.431239	0.491296	0.107531	0.931292	130.733	144.88	11.4339
BATF	opp	-14.5	99	128.43	142.649	11.9436	0.00410131	0.117512	-2.4641	0.931292	137.905	153.173	11.7433
BATF	same	-14.5	114	117.84	130.363	11.4177	0.384492	0.480416	-0.336317	0.919337	128.179	141.801	11.3216
BATF	same	-13.5	146	128.245	142.37	11.9319	0.0558924	0.341802	1.48801	0.919337	139.498	154.861	11.8109
BATF	opp	-13.5	128	126.993	140.347	11.8468	0.441073	0.491296	0.0850108	0.931292	136.362	150.701	11.6774
BATF	opp	-12.5	109	121.824	135.135	11.6247	0.131173	0.395354	-1.10318	0.931292	130.812	145.105	11.4373
BATF	same	-12.5	119	127.785	141.083	11.8778	0.233887	0.447315	-0.739587	0.919337	138.997	153.462	11.7897
BATF	same	-11.5	137	125.785	138.536	11.7701	0.148343	0.395354	0.952822	0.919337	136.822	150.691	11.6971
BATF	opp	-11.5	122	120.471	133.003	11.5327	0.420941	0.490145	0.132565	0.931292	129.359	142.816	11.3736
BATF	same	-10.5	112	121.805	134.666	11.6045	0.200764	0.434595	-0.844939	0.919337	132.492	146.481	11.5105
BATF	opp	-10.5	124	122.527	135.382	11.6354	0.423549	0.490145	0.12662	0.931292	131.566	145.371	11.4702
BATF	opp	-9.5	102	122.348	134.736	11.6076	0.0335483	0.280586	-1.75302	0.931292	131.375	144.676	11.4619
BATF	same	-9.5	109	108.574	119.333	10.924	0.458293	0.495454	0.0389985	0.919337	118.1	129.803	10.8674
BATF	opp	-8.5	119	128.227	143.078	11.9615	0.222208	0.447315	-0.771372	0.931292	137.687	153.634	11.734
BATF	same	-8.5	120	117.129	129.525	11.3809	0.372462	0.475924	0.252261	0.919337	127.406	140.89	11.2874
BATF	opp	-7.5	138	141.289	155.424	12.4669	0.412401	0.48956	-0.263855	0.931292	151.713	166.891	12.3172
BATF	same	-7.5	77	77.2691	85.1111	9.22557	0.518041	0.533201	-0.0291654	0.919337	84.0487	92.5788	9.16781
BATF	same	-6.5	97	89.2408	99.1203	9.95592	0.18978	0.431344	0.77936	0.919337	97.0708	107.817	9.85245
BATF	opp	-6.5	115	116.586	125.213	11.1898	0.466043	0.495454	-0.141697	0.931292	125.187	134.45	11.1887
BATF	same	-5.5	159	146.949	158.837	12.603	0.150406	0.395354	0.956189	0.919337	159.842	172.773	12.6429
BATF	opp	-5.5	49	46.4609	49.6112	7.04352	0.320828	0.447315	0.360491	0.931292	49.8886	53.2714	7.06319
BATF	opp	-4.5	24	16.0284	17.2501	4.15333	0.0227268	0.267818	1.91932	0.931292	17.211	18.5228	4.14861
BATF	same	-4.5	355	337.589	374.971	19.3642	0.164687	0.399634	0.899128	0.919337	367.209	407.871	19.1627
BATF	opp	-3.5	16	25.3273	29.0953	5.394	0.0329778	0.280586	-1.7292	0.931292	27.1959	31.2418	5.21497
BATF	same	-3.5	383	351.984	395.371	19.8839	0.0480149	0.341802	1.55984	0.919337	382.867	430.061	19.567
BATF	opp	-2.5	29	33.0796	36.9217	6.07632	0.272756	0.447315	-0.671397	0.931292	35.5201	39.6457	5.95988
BATF	same	-2.5	288	281.452	311.875	17.66	0.334231	0.448373	0.370769	0.919337	306.147	339.239	17.4971
BATF	opp	-1.5	111	95.8403	105.542	10.2734	0.0575861	0.341802	1.47563	0.931292	102.911	113.328	10.1445
BATF	same	-1.5	141	133.945	147.39	12.1404	0.254294	0.447315	0.581084	0.919337	145.698	160.323	12.0705
BATF	same	-0.5	107	99.6044	111.355	10.5525	0.212578	0.447315	0.70084	0.919337	108.344	121.125	10.4088
BATF	opp	-0.5	163	170	186.468	13.6553	0.31246	0.447315	-0.512629	0.931292	182.542	200.225	13.5108
BATF	same	0.5	120	127.657	148.344	12.1797	0.266109	0.447315	-0.628694	0.897541	140.524	163.296	11.8543
BATF	opp	0.5	157	158.849	172.926	13.1501	0.462572	0.495454	-0.14063	0.965446	167.497	182.341	12.9421
BATF	opp	1.5	292	257.631	283.969	16.8514	0.0163347	0.267818	2.03952	0.965446	266.852	294.132	16.3356
BATF	same	1.5	95	83.2236	92.0967	9.5967	0.0913699	0.347782	1.22713	0.897541	92.724	102.61	9.62933
BATF	same	2.5	89	81.7601	87.2476	9.34064	0.194574	0.431344	0.775101	0.897541	91.0934	97.2073	9.54429
BATF	opp	2.5	0	0	0	0	1	1	0	0.965446	0	0	0
BATF	same	3.5	15	17.9874	20.2757	4.50285	0.287646	0.447315	-0.663441	0.897541	20.0407	22.5902	4.47669
BATF	opp	3.5	0	0.185917	0.196966	0.443808	0.830343	0.83488	-0.418912	0.965446	0.192571	0.204016	0.438829
BATF	opp	4.5	389	427.774	481.258	21.9376	0.03067	0.280586	-1.76748	0.965446	443.085	498.483	21.0496
BATF	same	4.5	0	0.376354	0.421684	0.649372	0.686359	0.693901	-0.579567	0.897541	0.419317	0.469821	0.647547
BATF	opp	5.5	95	89.9293	95.8763	9.79165	0.274608	0.447315	0.517855	0.965446	93.148	99.3079	9.65132
BATF	same	5.5	2	2.56805	2.64305	1.62575	0.526479	0.538178	-0.349411	0.897541	2.86121	2.94477	1.69151
BATF	same	6.5	129	119.393	126.204	11.2341	0.176844	0.411891	0.855193	0.897541	133.022	140.611	11.5335
BATF	opp	6.5	15	15.242	16.5287	4.06555	0.543313	0.552318	-0.0595329	0.965446	15.7876	17.1203	3.97336
BATF	same	7.5	398	384.819	429.889	20.7338	0.241398	0.447315	0.635749	0.897541	428.748	478.962	20.7062
BATF	opp	7.5	10	9.93378	10.7791	3.28315	0.408676	0.48956	0.020169	0.965446	10.2893	11.1649	3.2077
BATF	opp	8.5	79	83.9679	96.0123	9.79859	0.317883	0.447315	-0.507005	0.965446	86.9732	99.4487	9.32594
BATF	same	8.5	31	31.8633	34.752	5.89508	0.486121	0.511121	-0.14645	0.897541	35.5007	38.7191	5.95825
BATF	same	9.5	28	25.1677	27.6628	5.25954	0.247305	0.447315	0.538508	0.897541	28.0407	30.8206	5.29535
BATF	opp	9.5	102	109.476	115.869	10.7642	0.25532	0.447315	-0.694486	0.965446	113.394	120.016	10.6487
BATF	same	10.5	136	124.286	136.244	11.6724	0.137188	0.395354	1.00354	0.897541	138.474	151.797	11.7675
BATF	opp	10.5	122	117.64	128.532	11.3372	0.322648	0.447315	0.384557	0.965446	121.851	133.132	11.0386
BATF	same	11.5	112	103.771	112.686	10.6154	0.194505	0.431344	0.775173	0.897541	115.617	125.55	10.7525
BATF	opp	11.5	127	131.047	146.369	12.0983	0.383382	0.480416	-0.334498	0.965446	135.737	151.608	11.6506
BATF	same	12.5	150	131.969	146.819	12.1169	0.0557339	0.341802	1.48811	0.897541	147.034	163.579	12.1257
BATF	opp	12.5	122	122.148	134.531	11.5988	0.518711	0.533201	-0.0127615	0.965446	126.52	139.346	11.2481
BATF	same	13.5	153	135.786	150.718	12.2767	0.0664491	0.347782	1.40214	0.897541	151.287	167.923	12.2999
BATF	opp	13.5	109	112.065	123.481	11.1122	0.410054	0.48956	-0.275818	0.965446	116.076	127.901	10.7739
BATF	same	14.5	152	131.127	144.845	12.0352	0.0333902	0.280586	1.73437	0.897541	146.095	161.38	12.087
BATF	opp	14.5	122	124.179	137.839	11.7405	0.445905	0.491296	-0.185605	0.965446	128.624	142.772	11.3412
BATF	opp	15.5	140	129.317	143.309	11.9712	0.162512	0.399634	0.892401	0.965446	133.945	148.438	11.5735
BATF	same	15.5	129	134.836	149.379	12.2221	0.327037	0.447315	-0.47746	0.897541	150.228	166.432	12.2567
BATF	opp	16.5	136	130.309	143.922	11.9968	0.290255	0.447315	0.474387	0.965446	134.973	149.073	11.6178
BATF	same	16.5	115	120.812	133.822	11.5681	0.318595	0.447315	-0.502445	0.897541	134.604	149.098	11.6019
BATF	opp	17.5	119	128.375	141.871	11.911	0.218361	0.447315	-0.787131	0.965446	132.97	146.949	11.5313
BATF	same	17.5	127	120.659	133.032	11.5339	0.263669	0.447315	0.549759	0.897541	134.433	148.218	11.5945
BATF	opp	18.5	115	123.882	136.646	11.6896	0.227646	0.447315	-0.759783	0.965446	128.315	141.537	11.3276
BATF	same	18.5	120	128.939	142.304	11.9291	0.230658	0.447315	-0.749356	0.897541	143.658	158.548	11.9858
BATF	opp	19.5	121	129.221	142.249	11.9268	0.250999	0.447315	-0.689309	0.965446	133.846	147.34	11.5692
BATF	same	19.5	114	120.313	133.309	11.546	0.301876	0.447315	-0.546801	0.897541	134.048	148.527	11.5779
BATF	same	20.5	99	116.76	128.89	11.353	0.0522453	0.341802	-1.56434	0.897541	130.089	143.603	11.4056
BATF	opp	20.5	109	122.828	135.719	11.6498	0.113128	0.378463	-1.18699	0.965446	127.224	140.576	11.2794
BATF	same	21.5	110	123.483	135.813	11.6539	0.120095	0.380991	-1.15699	0.897541	137.58	151.316	11.7294
BATF	opp	21.5	121	114.002	125.8	11.2161	0.238791	0.447315	0.623915	0.965446	118.082	130.303	10.8666
BATF	same	22.5	118	132.873	147.41	12.1413	0.104616	0.37018	-1.22497	0.897541	148.041	164.238	12.1672
BATF	opp	22.5	119	121.187	134.133	11.5816	0.444966	0.491296	-0.188812	0.965446	125.524	138.934	11.2038
BATF	opp	23.5	149	120.411	133.141	11.5387	0.00510924	0.117512	2.47769	0.965446	124.72	137.906	11.1678
BATF	same	23.5	124	126.333	138.724	11.7781	0.44093	0.491296	-0.198091	0.897541	140.755	154.561	11.864
BATF	opp	24.5	124	118.814	131.409	11.4634	0.297112	0.447315	0.452377	0.965446	123.067	136.112	11.0935
BATF	same	24.5	127	126.227	139.783	11.823	0.449112	0.491885	0.0653486	0.897541	140.637	155.739	11.859
BATF	same	25.5	150	131.338	145.699	12.0706	0.0496851	0.341802	1.5461	0.897541	146.331	162.332	12.0967
BATF	opp	25.5	126	124.274	137.073	11.7078	0.415257	0.48979	0.147455	0.965446	128.722	141.979	11.3456
BATF	opp	26.5	109	119.988	132.049	11.4912	0.16941	0.399634	-0.956219	0.965446	124.283	136.775	11.1482
BATF	same	26.5	120	126.545	140.26	11.8431	0.299183	0.447315	-0.552608	0.897541	140.99	156.271	11.8739
BATF	same	27.5	116	122.794	135.266	11.6304	0.288495	0.447315	-0.584186	0.897541	136.812	150.708	11.6967
BATF	opp	27.5	134	128.682	142.457	11.9356	0.300237	0.447315	0.445596	0.965446	133.287	147.556	11.545
BATF	opp	28.5	115	130.898	144.916	12.0381	0.0871105	0.347782	-1.32067	0.965446	135.583	150.103	11.644
BATF	same	28.5	116	118.917	131.25	11.4564	0.41799	0.489873	-0.254607	0.897541	132.492	146.232	11.5105
BATF	same	29.5	137	121.375	134.276	11.5878	0.0738505	0.347782	1.34838	0.897541	135.231	149.604	11.6289
BATF	opp	29.5	114	130.181	144.071	12.003	0.0824932	0.347782	-1.34808	0.965446	134.84	149.228	11.6121
BATF	same	30.5	142	121.808	134.861	11.613	0.0328899	0.280586	1.73875	0.897541	135.713	150.256	11.6496
BATF	opp	30.5	111	131.643	146.197	12.0912	0.0368456	0.294765	-1.70725	0.965446	136.354	151.43	11.6771
BATF	opp	31.5	116	131.58	145.64	12.0681	0.0923838	0.347782	-1.29103	0.965446	136.29	150.852	11.6743
BATF	same	31.5	132	118.951	131.252	11.4565	0.108455	0.372152	1.13901	0.897541	132.53	146.235	11.5122
BATF	same	32.5	102	117.785	129.967	11.4003	0.0770939	0.347782	-1.38461	0.897541	131.231	144.804	11.4556
BATF	opp	32.5	126	133.818	148.526	12.1871	0.266323	0.447315	-0.641515	0.965446	138.608	153.842	11.7732
BATF	same	33.5	134	124.897	138.405	11.7646	0.193982	0.431344	0.773741	0.897541	139.155	154.205	11.7964
BATF	opp	33.5	129	135.344	150.091	12.2512	0.311516	0.447315	-0.517817	0.965446	140.188	155.463	11.8401
BATF	opp	34.5	108	123.523	136.486	11.6827	0.0860909	0.347782	-1.32868	0.965446	127.944	141.371	11.3112
BATF	same	34.5	125	123.14	136.451	11.6812	0.410229	0.48956	0.159203	0.897541	137.197	152.028	11.7131
BATF	opp	35.5	116	127.373	140.847	11.8679	0.167877	0.399634	-0.958264	0.965446	131.931	145.888	11.4861
BATF	same	35.5	133	128.936	142.694	11.9455	0.339347	0.449208	0.340249	0.897541	143.654	158.984	11.9856
BATF	opp	36.5	106	129.344	143.314	11.9714	0.0198237	0.267818	-1.94995	0.965446	133.973	148.444	11.5747
BATF	same	36.5	125	127.451	140.869	11.8688	0.43704	0.491296	-0.206539	0.897541	142.001	156.95	11.9164
BATF	opp	37.5	110	126.961	140.559	11.8557	0.0695443	0.347782	-1.43065	0.965446	131.505	145.589	11.4676
BATF	same	37.5	130	127.705	141.225	11.8838	0.396996	0.486982	0.193106	0.897541	142.283	157.346	11.9283
BATF	opp	38.5	100	128.815	142.134	11.922	0.00493314	0.117512	-2.417	0.965446	133.426	147.221	11.551
BATF	same	38.5	136	125.571	139.516	11.8117	0.164454	0.399634	0.882943	0.897541	139.906	155.442	11.8282
BATF	same	39.5	128	112.741	124.355	11.1515	0.0712095	0.347782	1.36834	0.897541	125.611	138.551	11.2076
BATF	opp	39.5	126	132.667	146.362	12.098	0.29976	0.447315	-0.551122	0.965446	137.416	151.601	11.7224
BATF	opp	40.5	145	133.359	146.941	12.1219	0.14681	0.395354	0.960342	0.965446	138.132	152.2	11.753
BATF	same	40.5	109	115.909	128.319	11.3278	0.279176	0.447315	-0.609937	0.897541	129.141	142.968	11.364
BATF	opp	41.5	135	130.987	144.535	12.0223	0.342145	0.449676	0.33383	0.965446	135.675	149.708	11.648
BATF	same	41.5	123	121.671	134.624	11.6028	0.428383	0.491296	0.114548	0.897541	135.56	149.992	11.643
BATF	same	42.5	139	127.427	141.983	11.9157	0.142798	0.395354	0.971268	0.897541	141.973	158.191	11.9152
BATF	opp	42.5	125	126.554	139.844	11.8256	0.468527	0.495454	-0.13141	0.965446	131.084	144.849	11.4492
BATF	same	43.5	120	128.533	143.053	11.9605	0.241565	0.447315	-0.713453	0.897541	143.206	159.383	11.9669
BATF	opp	43.5	118	124.928	137.904	11.7432	0.286014	0.447315	-0.589938	0.965446	129.399	142.839	11.3754
BATF	opp	44.5	92	125.332	138.663	11.7755	0.00110125	0.101315	-2.83059	0.965446	129.817	143.626	11.3937
BATF	same	44.5	140	117.206	129.888	11.3968	0.0178366	0.267818	2.00003	0.897541	130.586	144.715	11.4274
BATF	same	45.5	139	122.28	135.165	11.626	0.0620976	0.347782	1.43812	0.897541	136.239	150.595	11.6722
BATF	opp	45.5	107	121.442	134.064	11.5786	0.101136	0.364884	-1.24726	0.965446	125.788	138.862	11.2155
BATF	opp	46.5	94	130.51	144.59	12.0246	0.000480916	0.0884886	-3.03629	0.965446	135.181	149.765	11.6267
BATF	same	46.5	140	128.554	141.832	11.9093	0.146319	0.395354	0.961063	0.897541	143.23	158.023	11.9679
BCL6/2	opp	-42.5	97	76.6429	84.8466	9.21122	0.0106304	0.206882	2.21003	1.01657	75.3938	83.4638	8.68296
BCL6/2	same	-42.5	82	82.4468	90.8796	9.53308	0.509669	0.533939	-0.0468672	1.03156	79.9244	88.0993	8.94004
BCL6/2	same	-41.5	65	81.3894	89.4574	9.45819	0.0355654	0.312975	-1.73283	1.03156	78.8994	86.7205	8.88253
BCL6/2	opp	-41.5	90	81.7966	90.4463	9.51033	0.167496	0.449345	0.862573	1.01657	80.4636	88.9723	8.97015
BCL6/2	same	-40.5	85	80.2315	88.5174	9.40837	0.274137	0.452059	0.506831	1.03156	77.7769	85.8093	8.81912
BCL6/2	opp	-40.5	78	78.9672	87.4239	9.35008	0.486507	0.52411	-0.103446	1.01657	77.6803	85.9991	8.81364
BCL6/2	same	-39.5	72	83.6688	92.6271	9.6243	0.109134	0.409337	-1.21244	1.03156	81.1091	89.7933	9.00606
BCL6/2	opp	-39.5	83	75.6029	83.2778	9.12567	0.180896	0.449345	0.810587	1.01657	74.3707	81.9206	8.62385
BCL6/2	opp	-38.5	61	74.3983	81.763	9.04229	0.0639949	0.409337	-1.48174	1.01657	73.1858	80.4305	8.55487
BCL6/2	same	-38.5	86	79.3675	87.4122	9.34945	0.209687	0.449801	0.7094	1.03156	76.9393	84.7379	8.77151
BCL6/2	opp	-37.5	81	77.3886	85.3392	9.23792	0.314859	0.454574	0.390936	1.01657	76.1273	83.9484	8.7251
BCL6/2	same	-37.5	84	84.6771	92.8744	9.63713	0.499559	0.532863	-0.0702557	1.03156	82.0864	90.0329	9.06016
BCL6/2	same	-36.5	89	85.0344	93.8194	9.68604	0.309223	0.454574	0.409411	1.03156	82.4329	90.9491	9.07926
BCL6/2	opp	-36.5	76	75.9984	84.1604	9.1739	0.469472	0.519667	0.000171289	1.01657	74.7598	82.7888	8.64638
BCL6/2	opp	-35.5	66	72.5326	79.7865	8.93233	0.242393	0.449801	-0.731348	1.01657	71.3505	78.4862	8.44693
BCL6/2	same	-35.5	84	82.5217	90.594	9.51809	0.40702	0.487317	0.155318	1.03156	79.997	87.8224	8.9441
BCL6/2	same	-34.5	82	83.9078	92.2739	9.60593	0.445971	0.511301	-0.198604	1.03156	81.3407	89.4508	9.01891
BCL6/2	opp	-34.5	77	76.8829	84.7349	9.20516	0.464422	0.519667	0.0127239	1.01657	75.6299	83.354	8.69654
BCL6/2	same	-33.5	68	85.5368	94.4698	9.71956	0.0293624	0.276509	-1.80428	1.03156	82.9199	91.5796	9.10603
BCL6/2	opp	-33.5	79	74.9746	82.4566	9.08056	0.295772	0.454574	0.443302	1.01657	73.7527	81.1128	8.58794
BCL6/2	same	-32.5	65	86.8867	95.8483	9.79021	0.00863298	0.206882	-2.23557	1.03156	84.2285	92.9159	9.17761
BCL6/2	opp	-32.5	83	79.4056	87.7085	9.36528	0.317685	0.454574	0.383798	1.01657	78.1115	86.2791	8.83807
BCL6/2	same	-31.5	68	78.4183	86.3205	9.29088	0.130146	0.446705	-1.12135	1.03156	76.0192	83.6796	8.7189
BCL6/2	opp	-31.5	73	75.5119	83.1334	9.11775	0.41556	0.490862	-0.275494	1.01657	74.2812	81.7785	8.61866
BCL6/2	opp	-30.5	86	76.6904	84.6003	9.19784	0.132179	0.446705	1.01215	1.01657	75.4405	83.2216	8.68565
BCL6/2	same	-30.5	78	78.9256	87.0855	9.33196	0.488376	0.52411	-0.0991843	1.03156	76.5109	84.4212	8.74705
BCL6/2	opp	-29.5	100	84.2331	93.033	9.64536	0.0411805	0.31512	1.63466	1.01657	82.8604	91.5168	9.10277
BCL6/2	same	-29.5	71	78.7235	86.8789	9.32088	0.209554	0.449801	-0.828625	1.03156	76.315	84.2209	8.73585
BCL6/2	same	-28.5	72	81.3351	89.5967	9.46555	0.163696	0.449345	-0.986217	1.03156	78.8467	86.8556	8.87957
BCL6/2	opp	-28.5	73	81.0266	89.4874	9.45978	0.203049	0.449801	-0.848498	1.01657	79.7061	88.0289	8.92783
BCL6/2	opp	-27.5	81	75.7356	82.94	9.10714	0.250418	0.449801	0.578056	1.01657	74.5013	81.5883	8.63141
BCL6/2	same	-27.5	85	83.3791	92.7666	9.63154	0.40149	0.483987	0.168289	1.03156	80.8282	89.9285	8.99045
BCL6/2	same	-26.5	88	83.2082	92.0808	9.59587	0.276845	0.452059	0.499361	1.03156	80.6625	89.2637	8.98123
BCL6/2	opp	-26.5	89	87.1515	96.5079	9.82384	0.394253	0.483987	0.188168	1.01657	85.7311	94.9351	9.25911
BCL6/2	opp	-25.5	73	80.2914	88.3828	9.40121	0.226596	0.449801	-0.775586	1.01657	78.9829	86.9424	8.88723
BCL6/2	same	-25.5	84	78.334	86.3831	9.29425	0.239957	0.449801	0.609627	1.03156	75.9374	83.7402	8.71421
BCL6/2	same	-24.5	103	80.09	88.2997	9.39679	0.00587365	0.206753	2.43806	1.03156	77.6397	85.5983	8.81134
BCL6/2	opp	-24.5	86	82.7546	91.585	9.57	0.334734	0.455041	0.339118	1.01657	81.4059	90.0924	9.02252
BCL6/2	same	-23.5	77	87.0778	96.7684	9.8371	0.152	0.449345	-1.02447	1.03156	84.4138	93.8079	9.1877
BCL6/2	opp	-23.5	92	83.8975	92.4487	9.61502	0.173172	0.449345	0.842693	1.01657	82.5302	90.942	9.08461
BCL6/2	same	-22.5	83	76.7843	84.9409	9.21634	0.219347	0.449801	0.674426	1.03156	74.4351	82.3422	8.62758
BCL6/2	opp	-22.5	79	84.6059	93.7822	9.68412	0.293738	0.454574	-0.578878	1.01657	83.2271	92.2538	9.12289
BCL6/2	same	-21.5	70	73.7312	81.0591	9.00328	0.359604	0.461973	-0.414428	1.03156	71.4755	78.5792	8.45432
BCL6/2	opp	-21.5	80	83.1975	92.1734	9.6007	0.39014	0.483987	-0.333045	1.01657	81.8416	90.6712	9.04663
BCL6/2	opp	-20.5	98	84.4986	93.2564	9.65693	0.0666198	0.409337	1.39811	1.01657	83.1215	91.7365	9.1171
BCL6/2	same	-20.5	71	79.2699	87.6071	9.35987	0.192561	0.449801	-0.883553	1.03156	76.8447	84.9269	8.76611
BCL6/2	opp	-19.5	89	84.9909	94.0835	9.69966	0.307544	0.454574	0.413327	1.01657	83.6057	92.5502	9.14362
BCL6/2	same	-19.5	79	79.9914	88.7719	9.42188	0.485515	0.52411	-0.105221	1.03156	77.5441	86.056	8.80591
BCL6/2	opp	-18.5	104	90.5435	100.764	10.0381	0.0737545	0.409337	1.34054	1.01657	89.0679	99.1222	9.43758
BCL6/2	same	-18.5	72	79.711	87.7461	9.36729	0.211465	0.449801	-0.823188	1.03156	77.2724	85.0616	8.79047
BCL6/2	same	-17.5	89	81.7481	90.0774	9.49091	0.194205	0.449801	0.764084	1.03156	79.2471	87.3215	8.90209
BCL6/2	opp	-17.5	83	84.6207	93.1753	9.65274	0.458616	0.519667	-0.167906	1.01657	83.2416	91.6568	9.12369
BCL6/2	same	-16.5	88	79.2541	87.6504	9.36218	0.149704	0.449345	0.934174	1.03156	76.8294	84.9688	8.76524
BCL6/2	opp	-16.5	79	79.6013	87.4969	9.35398	0.502934	0.533231	-0.0642852	1.01657	78.304	86.0709	8.84896
BCL6/2	opp	-15.5	57	79.2768	87.4938	9.35381	0.00533658	0.206753	-2.38157	1.01657	77.9848	86.0679	8.8309
BCL6/2	same	-15.5	75	78.5578	86.3332	9.29157	0.371338	0.469112	-0.382904	1.03156	76.1544	83.6919	8.72665
BCL6/2	opp	-14.5	59	77.3887	85.3306	9.23746	0.0178334	0.233098	-1.99067	1.01657	76.1275	83.94	8.72511
BCL6/2	same	-14.5	71	79.9831	88.0384	9.38288	0.1718	0.449345	-0.957387	1.03156	77.536	85.345	8.80546
BCL6/2	same	-13.5	76	82.7332	91.4093	9.56082	0.249652	0.449801	-0.704252	1.03156	80.2021	88.6127	8.95556
BCL6/2	opp	-13.5	81	80.0217	88.5004	9.40747	0.427259	0.501317	0.103996	1.01657	78.7175	87.0581	8.87229
BCL6/2	same	-12.5	97	85.9884	94.9387	9.74365	0.108831	0.409337	1.13013	1.03156	83.3577	92.0342	9.13004
BCL6/2	opp	-12.5	68	74.4528	81.9783	9.05419	0.24832	0.449801	-0.712684	1.01657	73.2394	80.6423	8.558
BCL6/2	opp	-11.5	83	79.3626	87.7076	9.36524	0.315949	0.454574	0.388395	1.01657	78.0692	86.2782	8.83568
BCL6/2	same	-11.5	86	86.039	94.8349	9.73832	0.526961	0.54556	-0.0040031	1.03156	83.4067	91.9336	9.13273
BCL6/2	opp	-10.5	87	75.7869	83.3967	9.13218	0.0914989	0.409337	1.22787	1.01657	74.5518	82.0375	8.63434
BCL6/2	same	-10.5	73	79.0406	86.5857	9.30515	0.270366	0.452059	-0.649168	1.03156	76.6224	83.9367	8.75342
BCL6/2	same	-9.5	106	87.5865	96.6909	9.83315	0.024345	0.276509	1.87259	1.03156	84.9069	93.7328	9.21449
BCL6/2	opp	-9.5	76	73.725	81.3251	9.01804	0.366737	0.467723	0.252267	1.01657	72.5235	79.9997	8.51607
BCL6/2	same	-8.5	66	86.2278	95.1298	9.75345	0.0140594	0.206882	-2.07391	1.03156	83.5897	92.2194	9.14274
BCL6/2	opp	-8.5	66	74.2925	82.248	9.06907	0.183823	0.449345	-0.914376	1.01657	73.0818	80.9076	8.54879
BCL6/2	opp	-7.5	82	74.4172	82.5759	9.08713	0.173674	0.449345	0.834456	1.01657	73.2044	81.2302	8.55596
BCL6/2	same	-7.5	72	80.0608	88.0039	9.38104	0.200484	0.449801	-0.85927	1.03156	77.6115	85.3115	8.80974
BCL6/2	opp	-6.5	71	68.1501	75.1922	8.67135	0.336298	0.455041	0.328655	1.01657	67.0394	73.9668	8.18776
BCL6/2	same	-6.5	98	95.0718	104.978	10.2459	0.356986	0.461973	0.285796	1.03156	92.1631	101.766	9.60016
BCL6/2	same	-5.5	76	88.4741	98.4612	9.92276	0.0993421	0.409337	-1.25712	1.03156	85.7673	95.4489	9.26106
BCL6/2	opp	-5.5	44	47.5433	50.5052	7.1067	0.33662	0.455041	-0.498587	1.01657	46.7685	49.6821	6.83875
BCL6/2	same	-4.5	118	107.033	119.049	10.911	0.134519	0.446705	1.00513	1.03156	103.758	115.407	10.1862
BCL6/2	opp	-4.5	27	32.8003	35.1793	5.93121	0.178224	0.449345	-0.977922	1.01657	32.2657	34.6059	5.68029
BCL6/2	opp	-3.5	5	8.09793	8.59597	2.93189	0.182429	0.449345	-1.05663	1.01657	7.96595	8.45588	2.8224
BCL6/2	same	-3.5	137	137.162	146.553	12.1059	0.517173	0.538594	-0.0134072	1.03156	132.966	142.069	11.5311
BCL6/2	opp	-2.5	4	2.10862	2.1666	1.47194	0.0629852	0.409337	1.28496	1.01657	2.07426	2.13129	1.44023
BCL6/2	same	-2.5	297	304.504	339.549	18.4268	0.347036	0.461973	-0.407231	1.03156	295.188	329.161	17.181
BCL6/2	opp	-1.5	1	0.266796	0.275579	0.524956	0.0298505	0.276509	1.3967	1.01657	0.262448	0.271087	0.512296
BCL6/2	same	-1.5	371	382.712	435.446	20.8673	0.285222	0.454574	-0.561266	1.03156	371.003	422.124	19.2614
BCL6/2	same	-0.5	373	391.372	428.697	20.705	0.183551	0.449345	-0.887322	1.03156	379.398	415.581	19.4781
BCL6/2	opp	-0.5	0	0	0	0	1	1	0	1.01657	0	0	0
BCL6/2	same	0.5	216	235.576	254.298	15.9467	0.10579	0.409337	-1.22761	1.00434	231.423	249.814	15.2126
BCL6/2	opp	0.5	0	0	0	0	1	1	0	0.961026	0	0	0
BCL6/2	same	1.5	0	1.36256	1.41121	1.18794	0.256005	0.449801	-1.14699	1.00434	1.35667	1.40511	1.16476
BCL6/2	opp	1.5	14	14.0564	15.1719	3.89512	0.564457	0.580961	-0.0144852	0.961026	14.6265	15.7872	3.82446
BCL6/2	opp	2.5	152	158.73	167.843	12.9554	0.314039	0.454574	-0.519454	0.961026	165.167	174.65	12.8517
BCL6/2	same	2.5	0	0	0	0	1	1	0	1.00434	0	0	0
BCL6/2	opp	3.5	165	186.262	194.411	13.9431	0.0619669	0.409337	-1.5249	0.961026	193.816	202.295	13.9218
BCL6/2	same	3.5	0	0	0	0	1	1	0	1.00434	0	0	0
BCL6/2	opp	4.5	326	351.633	399.451	19.9863	0.088871	0.409337	-1.28252	0.961026	365.893	415.651	19.1283
BCL6/2	same	4.5	0	0.676422	0.707034	0.840853	0.508433	0.533939	-0.804447	1.00434	0.6735	0.70398	0.82067
BCL6/2	opp	5.5	358	286.523	324.105	18.0029	2.06508e-05	0.00363455	3.97033	0.961026	298.142	337.249	17.2668
BCL6/2	same	5.5	3	3.07455	3.20442	1.79009	0.630535	0.645199	-0.0416453	1.00434	3.06127	3.19058	1.74965
BCL6/2	opp	6.5	162	146.934	161.532	12.7095	0.100988	0.409337	1.1854	0.961026	152.893	168.083	12.365
BCL6/2	same	6.5	17	15.0092	16.2933	4.0365	0.25192	0.449801	0.493204	1.00434	14.9444	16.223	3.86579
BCL6/2	opp	7.5	78	92.7309	102.358	10.1172	0.0667492	0.409337	-1.45602	0.961026	96.4916	106.509	9.82301
BCL6/2	same	7.5	53	50.1005	53.8679	7.33948	0.309125	0.454574	0.395053	1.00434	49.8841	53.6353	7.06287
BCL6/2	opp	8.5	89	82.4472	91.7682	9.57957	0.216472	0.449801	0.684038	0.961026	85.7909	95.4898	9.26234
BCL6/2	same	8.5	60	64.3506	69.6716	8.34695	0.321364	0.455041	-0.521215	1.00434	64.0726	69.3707	8.00454
BCL6/2	opp	9.5	78	82.4134	91.0688	9.543	0.338696	0.455041	-0.462478	0.961026	85.7557	94.7621	9.26044
BCL6/2	same	9.5	75	72.3471	79.4002	8.91068	0.349186	0.461973	0.297719	1.00434	72.0346	79.0573	8.48732
BCL6/2	same	10.5	82	75.9356	83.5302	9.13949	0.223115	0.449801	0.663539	1.00434	75.6076	83.1694	8.69526
BCL6/2	opp	10.5	88	82.6959	91.3435	9.55738	0.258125	0.449801	0.554972	0.961026	86.0497	95.048	9.2763
BCL6/2	same	11.5	71	79.8875	88.6141	9.41351	0.174489	0.449345	-0.944123	1.00434	79.5424	88.2313	8.91866
BCL6/2	opp	11.5	75	82.3239	90.6531	9.52119	0.228379	0.449801	-0.769223	0.961026	85.6626	94.3295	9.25541
BCL6/2	opp	12.5	70	79.9606	88.0274	9.38229	0.144369	0.449345	-1.06164	0.961026	83.2034	91.5974	9.12159
BCL6/2	same	12.5	72	79.0227	87.3438	9.34579	0.234176	0.449801	-0.751428	1.00434	78.6814	86.9665	8.87025
BCL6/2	same	13.5	84	79.2635	87.66	9.36269	0.274113	0.452059	0.505896	1.00434	78.9211	87.2814	8.88375
BCL6/2	opp	13.5	82	78.9281	86.9926	9.32698	0.338074	0.455041	0.329357	0.961026	82.129	90.5206	9.06251
BCL6/2	same	14.5	76	73.8701	81.2957	9.01641	0.373157	0.469112	0.236221	1.00434	73.5511	80.9445	8.57619
BCL6/2	opp	14.5	75	78.0149	85.9051	9.2685	0.394626	0.483987	-0.32529	0.961026	81.1788	89.389	9.00993
BCL6/2	same	15.5	90	73.3323	80.8499	8.99166	0.0254627	0.276509	1.85368	1.00434	73.0156	80.5007	8.54492
BCL6/2	opp	15.5	83	77.8196	85.8278	9.26433	0.256228	0.449801	0.559181	0.961026	80.9755	89.3085	8.99864
BCL6/2	same	16.5	85	74.3206	81.6971	9.03865	0.0993876	0.409337	1.18153	1.00434	73.9996	81.3442	8.6023
BCL6/2	opp	16.5	87	76.7564	85.1982	9.23029	0.111637	0.409337	1.10979	0.961026	79.8692	88.6534	8.93696
BCL6/2	opp	17.5	59	71.0962	78.2476	8.84577	0.0814964	0.409337	-1.36745	0.961026	73.9795	81.4209	8.60113
BCL6/2	same	17.5	67	78.7478	86.6221	9.3071	0.100215	0.409337	-1.26224	1.00434	78.4076	86.248	8.85481
BCL6/2	same	18.5	99	83.1394	91.5381	9.56756	0.0394114	0.31512	1.65775	1.00434	82.7803	91.1427	9.09837
BCL6/2	opp	18.5	71	70.4715	77.554	8.80647	0.443515	0.511301	0.0600158	0.961026	73.3294	80.6992	8.56326
BCL6/2	same	19.5	66	86.2153	95.422	9.76842	0.0141056	0.206882	-2.06946	1.00434	85.843	95.0098	9.26515
BCL6/2	opp	19.5	73	71.4705	78.3395	8.85096	0.397973	0.483987	0.172809	0.961026	74.369	81.5165	8.62374
BCL6/2	opp	20.5	83	78.0237	86.122	9.28019	0.263822	0.452059	0.536228	0.961026	81.1879	89.6147	9.01044
BCL6/2	same	20.5	86	87.1392	96.1274	9.80446	0.479801	0.52411	-0.116187	1.00434	86.7628	95.7122	9.31465
BCL6/2	same	21.5	64	81.2896	89.8918	9.48113	0.0278541	0.276509	-1.82358	1.00434	80.9385	89.5035	8.99658
BCL6/2	opp	21.5	82	75.7431	83.5067	9.1382	0.216477	0.449801	0.684692	0.961026	78.8149	86.8934	8.87778
BCL6/2	opp	22.5	83	78.7267	87.0353	9.32927	0.290718	0.454574	0.458049	0.961026	81.9195	90.565	9.05094
BCL6/2	same	22.5	76	79.8895	87.7901	9.36964	0.358251	0.461973	-0.415115	1.00434	79.5444	87.4109	8.91877
BCL6/2	same	23.5	96	83.5994	92.2605	9.60524	0.0815659	0.409337	1.29103	1.00434	83.2383	91.862	9.1235
BCL6/2	opp	23.5	74	76.1972	83.7923	9.15381	0.430161	0.50138	-0.240031	0.961026	79.2874	87.1905	8.90435
BCL6/2	opp	24.5	71	77.7717	86.2282	9.28591	0.24138	0.449801	-0.729243	0.961026	80.9257	89.7252	8.99587
BCL6/2	same	24.5	83	81.3476	89.8669	9.47982	0.398963	0.483987	0.174312	1.00434	80.9962	89.4788	8.99979
BCL6/2	opp	25.5	89	77.4637	85.3963	9.24101	0.088068	0.409337	1.24838	0.961026	80.6053	88.8596	8.97804
BCL6/2	same	25.5	86	78.7006	86.9901	9.32685	0.188421	0.449801	0.782622	1.00434	78.3607	86.6143	8.85216
BCL6/2	same	26.5	63	81.7737	90.4122	9.50854	0.0185419	0.233098	-1.97441	1.00434	81.4205	90.0217	9.02333
BCL6/2	opp	26.5	81	70.391	77.4392	8.79996	0.0949679	0.409337	1.20557	0.961026	73.2457	80.5798	8.55837
BCL6/2	same	27.5	90	80.3557	89.0208	9.43508	0.129816	0.446705	1.02218	1.00434	80.0086	88.6363	8.94475
BCL6/2	opp	27.5	75	72.5333	80.3131	8.96176	0.357377	0.461973	0.27525	0.961026	75.4749	83.5702	8.68763
BCL6/2	same	28.5	61	76.3595	84.0357	9.1671	0.0408535	0.31512	-1.6755	1.00434	76.0296	83.6728	8.7195
BCL6/2	opp	28.5	81	74.5496	81.9169	9.05079	0.208403	0.449801	0.712683	0.961026	77.573	85.239	8.80755
BCL6/2	opp	29.5	84	79.3501	87.561	9.3574	0.2774	0.452059	0.496927	0.961026	82.5681	91.112	9.0867
BCL6/2	same	29.5	74	73.9063	81.0925	9.00513	0.464797	0.519667	0.010401	1.00434	73.5871	80.7422	8.57829
BCL6/2	opp	30.5	64	75.3379	82.4586	9.08067	0.10369	0.409337	-1.24857	0.961026	78.3932	85.8028	8.85399
BCL6/2	same	30.5	69	73.2188	80.5755	8.97638	0.337725	0.455041	-0.469988	1.00434	72.9025	80.2274	8.5383
BCL6/2	same	31.5	112	79.2937	87.5486	9.35674	0.000212946	0.0187393	3.49548	1.00434	78.9512	87.1705	8.88545
BCL6/2	opp	31.5	81	72.9405	80.3009	8.96108	0.158002	0.449345	0.899393	0.961026	75.8986	83.5575	8.71198
BCL6/2	opp	32.5	82	76.3353	84.358	9.18466	0.237229	0.449801	0.616753	0.961026	79.4311	87.7791	8.91241
BCL6/2	same	32.5	85	81.2754	89.6179	9.46668	0.314551	0.454574	0.393448	1.00434	80.9243	89.2309	8.99579
BCL6/2	same	33.5	93	82.2672	90.9645	9.53753	0.109394	0.409337	1.12533	1.00434	81.9118	90.5716	9.05051
BCL6/2	opp	33.5	72	76.3022	84.4882	9.19175	0.337356	0.455041	-0.468045	0.961026	79.3966	87.9146	8.91048
BCL6/2	opp	34.5	96	75.5282	83.2167	9.12232	0.00987419	0.206882	2.24415	0.961026	78.5912	86.5916	8.86517
BCL6/2	same	34.5	80	81.8602	90.7643	9.52703	0.447388	0.511301	-0.19526	1.00434	81.5067	90.3722	9.0281
BCL6/2	opp	35.5	80	71.3114	78.3885	8.85373	0.1389	0.449345	0.981354	0.961026	74.2034	81.5675	8.61414
BCL6/2	same	35.5	89	80.2546	88.2671	9.39506	0.151178	0.449345	0.930851	1.00434	79.908	87.8858	8.93912
BCL6/2	same	36.5	105	84.5169	93.655	9.67755	0.0134119	0.206882	2.11656	1.00434	84.1518	93.2505	9.17343
BCL6/2	opp	36.5	80	69.84	76.9544	8.77237	0.103021	0.409337	1.15818	0.961026	72.6724	80.0753	8.52481
BCL6/2	same	37.5	79	84.6181	93.6137	9.67542	0.293287	0.454574	-0.580657	1.00434	84.2526	93.2093	9.17892
BCL6/2	opp	37.5	75	74.9888	82.8566	9.10256	0.468826	0.519667	0.00123113	0.961026	78.03	86.2169	8.83346
BCL6/2	same	38.5	61	84.3084	93.4089	9.66483	0.00477314	0.206753	-2.41167	1.00434	83.9443	93.0055	9.16211
BCL6/2	opp	38.5	76	71.4234	78.4458	8.85697	0.269838	0.452059	0.516723	0.961026	74.32	81.6272	8.6209
BCL6/2	opp	39.5	56	68.6693	75.6494	8.69767	0.0675013	0.409337	-1.45663	0.961026	71.4542	78.7174	8.45306
BCL6/2	same	39.5	76	81.0694	89.3445	9.45222	0.310775	0.454574	-0.536315	1.00434	80.7192	88.9586	8.98439
BCL6/2	opp	40.5	76	68.9867	76.8088	8.76406	0.181778	0.449345	0.800229	0.961026	71.7845	79.9237	8.47257
BCL6/2	same	40.5	76	82.5026	91.1707	9.54834	0.257682	0.449801	-0.681016	1.00434	82.1462	90.7769	9.06345
BCL6/2	opp	41.5	82	72.0139	79.8972	8.93852	0.109988	0.409337	1.1172	0.961026	74.9344	83.1374	8.65647
BCL6/2	same	41.5	80	85.7959	94.9895	9.74626	0.287883	0.454574	-0.594681	1.00434	85.4253	94.5792	9.24258
BCL6/2	same	42.5	85	83.6018	92.7791	9.63219	0.410984	0.488737	0.145164	1.00434	83.2406	92.3783	9.12363
BCL6/2	opp	42.5	75	76.1841	83.9171	9.16063	0.476342	0.523976	-0.129256	0.961026	79.2737	87.3204	8.90358
BCL6/2	opp	43.5	99	78.1162	86.3006	9.28981	0.00969056	0.206882	2.24803	0.961026	81.2842	89.8005	9.01578
BCL6/2	same	43.5	65	75.7549	83.3131	9.1276	0.117658	0.422607	-1.17828	1.00434	75.4277	82.9532	8.68491
BCL6/2	opp	44.5	68	76.8689	84.7509	9.20603	0.170222	0.449345	-0.963379	0.961026	79.9863	88.188	8.94351
BCL6/2	same	44.5	72	78.4294	86.2703	9.28818	0.254899	0.449801	-0.692217	1.00434	78.0907	85.8977	8.83689
CCAAT/CEBP	same	-41.5	74	88.5165	97.881	9.89348	0.0650494	0.367379	-1.46728	0.905872	97.7141	108.052	9.88504
CCAAT/CEBP	opp	-41.5	120	111.647	123.793	11.1262	0.199689	0.474762	0.750762	0.946666	117.937	130.768	10.8599
CCAAT/CEBP	opp	-40.5	127	108.462	120.169	10.9622	0.0364286	0.292905	1.69111	0.946666	114.572	126.939	10.7038
CCAAT/CEBP	same	-40.5	83	90.6919	100.118	10.0059	0.227305	0.474762	-0.768733	0.905872	100.116	110.521	10.0058
CCAAT/CEBP	opp	-39.5	121	103.638	113.96	10.6752	0.0424084	0.317141	1.62636	0.946666	109.477	120.38	10.4631
CCAAT/CEBP	same	-39.5	81	88.9188	98.4291	9.92114	0.217658	0.474762	-0.79817	0.905872	98.1582	108.657	9.90748
CCAAT/CEBP	same	-38.5	80	95.6627	105.898	10.2907	0.0574396	0.352843	-1.52203	0.905872	105.603	116.901	10.2763
CCAAT/CEBP	opp	-38.5	95	97.5055	107.826	10.3839	0.425893	0.510576	-0.241284	0.946666	102.999	113.9	10.1488
CCAAT/CEBP	opp	-37.5	120	97.8587	107.867	10.3859	0.0130628	0.202648	2.13186	0.946666	103.372	113.944	10.1672
CCAAT/CEBP	same	-37.5	78	96.1981	106.155	10.3032	0.03238	0.292905	-1.76626	0.905872	106.194	117.185	10.305
CCAAT/CEBP	opp	-36.5	112	102.152	113.014	10.6308	0.153035	0.466987	0.926378	0.946666	107.907	119.381	10.3878
CCAAT/CEBP	same	-36.5	90	95.59	105.709	10.2815	0.305687	0.474762	-0.543699	0.905872	105.523	116.693	10.2724
CCAAT/CEBP	same	-35.5	80	89.6954	98.8888	9.94429	0.165942	0.474762	-0.974971	0.905872	99.0155	109.164	9.95065
CCAAT/CEBP	opp	-35.5	98	103.049	113.918	10.6733	0.331814	0.474762	-0.473043	0.946666	108.855	120.336	10.4333
CCAAT/CEBP	opp	-34.5	127	103.796	114.739	10.7116	0.011867	0.202648	2.16625	0.946666	109.644	121.203	10.4711
CCAAT/CEBP	same	-34.5	93	88.1878	97.3665	9.86745	0.281722	0.474762	0.487683	0.905872	97.3513	107.484	9.86668
CCAAT/CEBP	opp	-33.5	107	100.494	111.339	10.5517	0.239659	0.474762	0.616544	0.946666	106.156	117.612	10.3032
CCAAT/CEBP	same	-33.5	90	97.5416	107.987	10.3917	0.240493	0.474762	-0.725735	0.905872	107.677	119.208	10.3768
CCAAT/CEBP	opp	-32.5	120	100.135	110.846	10.5283	0.0234302	0.251874	1.88682	0.946666	105.776	117.091	10.2848
CCAAT/CEBP	same	-32.5	82	97.4487	107.374	10.3621	0.0619803	0.367379	-1.49088	0.905872	107.574	118.531	10.3718
CCAAT/CEBP	opp	-31.5	116	94.8529	104.597	10.2273	0.0153164	0.202648	2.06772	0.946666	100.197	110.49	10.0098
CCAAT/CEBP	same	-31.5	86	96.2466	106.438	10.3169	0.160188	0.466987	-0.993187	0.905872	106.247	117.498	10.3076
CCAAT/CEBP	same	-30.5	80	104.176	115.29	10.7373	0.00819688	0.176233	-2.25159	0.905872	115.001	127.269	10.7238
CCAAT/CEBP	opp	-30.5	92	92.1837	102.017	10.1003	0.520058	0.534729	-0.0181852	0.946666	97.3772	107.764	9.86799
CCAAT/CEBP	same	-29.5	91	95.2446	105.566	10.2745	0.356052	0.482212	-0.413115	0.905872	105.141	116.536	10.2538
CCAAT/CEBP	opp	-29.5	97	100.07	110.67	10.52	0.404681	0.510116	-0.291809	0.946666	105.708	116.905	10.2814
CCAAT/CEBP	opp	-28.5	113	107.588	119.233	10.9194	0.280688	0.474762	0.495624	0.946666	113.649	125.951	10.6606
CCAAT/CEBP	same	-28.5	94	94.8494	105.142	10.2539	0.492517	0.523082	-0.0828416	0.905872	104.705	116.067	10.2326
CCAAT/CEBP	opp	-27.5	111	99.461	109.711	10.4743	0.114999	0.420846	1.10165	0.946666	105.064	115.892	10.2501
CCAAT/CEBP	same	-27.5	99	100.325	110.624	10.5178	0.473788	0.514935	-0.125934	0.905872	110.749	122.119	10.5237
CCAAT/CEBP	same	-26.5	116	98.4776	108.535	10.418	0.0374646	0.292905	1.68193	0.905872	108.71	119.813	10.4264
CCAAT/CEBP	opp	-26.5	95	90.8099	99.9387	9.99694	0.306643	0.474762	0.41914	0.946666	95.926	105.569	9.79418
CCAAT/CEBP	same	-25.5	96	94.9789	105.102	10.2519	0.431427	0.510576	0.0996	0.905872	104.848	116.023	10.2395
CCAAT/CEBP	opp	-25.5	95	96.3166	106.796	10.3342	0.47357	0.514935	-0.127403	0.946666	101.743	112.812	10.0868
CCAAT/CEBP	opp	-24.5	85	96.4471	106.398	10.3149	0.131461	0.452227	-1.10976	0.946666	101.881	112.392	10.0936
CCAAT/CEBP	same	-24.5	91	92.7944	102.685	10.1334	0.453304	0.514935	-0.177074	0.905872	102.437	113.355	10.1211
CCAAT/CEBP	opp	-23.5	84	100.996	111.613	10.5647	0.047224	0.338438	-1.60876	0.946666	106.686	117.901	10.3289
CCAAT/CEBP	same	-23.5	91	91.1328	100.58	10.029	0.522294	0.534729	-0.0132397	0.905872	100.602	111.031	10.0301
CCAAT/CEBP	same	-22.5	88	96.8589	106.575	10.3235	0.199111	0.474762	-0.85813	0.905872	106.923	117.649	10.3404
CCAAT/CEBP	opp	-22.5	94	99.6031	110.043	10.4901	0.308918	0.474762	-0.53413	0.946666	105.215	116.243	10.2574
CCAAT/CEBP	opp	-21.5	113	102.951	114.546	10.7026	0.149454	0.466987	0.938902	0.946666	108.751	120.999	10.4284
CCAAT/CEBP	same	-21.5	90	96.7829	107.271	10.3572	0.264805	0.474762	-0.654902	0.905872	106.84	118.418	10.3363
CCAAT/CEBP	same	-20.5	101	94.9357	105.077	10.2507	0.247273	0.474762	0.591596	0.905872	104.8	115.996	10.2372
CCAAT/CEBP	opp	-20.5	99	102.763	113.851	10.6701	0.37941	0.505225	-0.352639	0.946666	108.552	120.265	10.4188
CCAAT/CEBP	same	-19.5	87	98.2381	108.988	10.4397	0.138535	0.45823	-1.07647	0.905872	108.446	120.313	10.4137
CCAAT/CEBP	opp	-19.5	103	104.586	116.23	10.781	0.464121	0.514935	-0.147133	0.946666	110.478	122.779	10.5109
CCAAT/CEBP	same	-18.5	81	94.1072	103.646	10.1807	0.0946348	0.394929	-1.28746	0.905872	103.886	114.415	10.1924
CCAAT/CEBP	opp	-18.5	105	104.529	115.454	10.7449	0.455763	0.514935	0.0438284	0.946666	110.418	121.958	10.508
CCAAT/CEBP	same	-17.5	90	84.3386	93.0425	9.64585	0.247955	0.474762	0.586924	0.905872	93.1021	102.71	9.64894
CCAAT/CEBP	opp	-17.5	106	106.306	117.372	10.8338	0.513942	0.534729	-0.0282758	0.946666	112.295	123.984	10.597
CCAAT/CEBP	opp	-16.5	125	103.813	114.257	10.6891	0.0189461	0.232767	1.9821	0.946666	109.662	120.694	10.472
CCAAT/CEBP	same	-16.5	84	84.7658	93.9566	9.69312	0.495711	0.523082	-0.0790067	0.905872	93.5737	103.719	9.67335
CCAAT/CEBP	opp	-15.5	102	100.76	110.994	10.5354	0.424884	0.510576	0.117692	0.946666	106.437	117.247	10.3168
CCAAT/CEBP	same	-15.5	83	83.1798	91.8912	9.58599	0.521282	0.534729	-0.0187594	0.905872	91.8229	101.439	9.58243
CCAAT/CEBP	same	-14.5	103	89.0965	99.0963	9.95471	0.0662137	0.367379	1.39667	0.905872	98.3545	109.393	9.91738
CCAAT/CEBP	opp	-14.5	98	97.0846	107.023	10.3452	0.436364	0.510576	0.0884832	0.946666	102.554	113.052	10.1269
CCAAT/CEBP	opp	-13.5	113	98.8909	109.41	10.4599	0.0733401	0.373015	1.34888	0.946666	104.462	115.574	10.2207
CCAAT/CEBP	same	-13.5	92	88.0274	96.7148	9.83437	0.311926	0.474762	0.403956	0.905872	97.1742	106.764	9.8577
CCAAT/CEBP	same	-12.5	82	80.9355	89.2944	9.44957	0.423936	0.510576	0.112646	0.905872	89.3455	98.5729	9.45227
CCAAT/CEBP	opp	-12.5	92	94.2538	103.89	10.1927	0.434877	0.510576	-0.221123	0.946666	99.564	109.743	9.97817
CCAAT/CEBP	same	-11.5	90	84.0978	92.7676	9.6316	0.239624	0.474762	0.612792	0.905872	92.8363	102.407	9.63516
CCAAT/CEBP	opp	-11.5	111	106.806	118.056	10.8654	0.320264	0.474762	0.385998	0.946666	112.823	124.707	10.6218
CCAAT/CEBP	opp	-10.5	102	110.384	122.188	11.0539	0.228584	0.474762	-0.758452	0.946666	116.603	129.072	10.7983
CCAAT/CEBP	same	-10.5	92	88.5388	97.4738	9.87288	0.331599	0.474762	0.350576	0.905872	97.7388	107.602	9.88629
CCAAT/CEBP	opp	-9.5	91	104.273	115.253	10.7356	0.103641	0.41004	-1.23634	0.946666	110.147	121.746	10.4951
CCAAT/CEBP	same	-9.5	88	86.9641	96.0264	9.79931	0.427767	0.510576	0.105712	0.905872	96.0004	106.004	9.79798
CCAAT/CEBP	opp	-8.5	109	100.858	111.666	10.5672	0.19352	0.474762	0.770466	0.946666	106.541	117.957	10.3218
CCAAT/CEBP	same	-8.5	91	84.2943	92.875	9.63717	0.214192	0.474762	0.695818	0.905872	93.0532	102.526	9.64641
CCAAT/CEBP	opp	-7.5	122	113.257	125.907	11.2208	0.191459	0.474762	0.779147	0.946666	119.638	133.001	10.9379
CCAAT/CEBP	same	-7.5	82	78.7128	86.8678	9.32029	0.329179	0.474762	0.352696	0.905872	86.8917	95.8941	9.32157
CCAAT/CEBP	same	-6.5	84	73.9772	80.9479	8.9971	0.112182	0.420846	1.11401	0.905872	81.6641	89.359	9.03682
CCAAT/CEBP	opp	-6.5	136	136.459	152.47	12.3479	0.507104	0.531841	-0.0371531	0.946666	144.147	161.059	12.0061
CCAAT/CEBP	opp	-5.5	111	102.009	109.87	10.4819	0.173104	0.474762	0.857787	0.946666	107.756	116.06	10.3805
CCAAT/CEBP	same	-5.5	81	80.5475	89.9278	9.48303	0.450465	0.514935	0.0477205	0.905872	88.917	99.2721	9.42958
CCAAT/CEBP	opp	-4.5	194	155.279	165.931	12.8814	0.00118258	0.050851	3.00592	0.946666	164.028	175.28	12.8073
CCAAT/CEBP	same	-4.5	34	40.962	45.579	6.75122	0.155946	0.466987	-1.03123	0.905872	45.2183	50.3151	6.72446
CCAAT/CEBP	opp	-3.5	1	3.02983	3.30763	1.81869	0.194737	0.474762	-1.11609	0.946666	3.20052	3.49398	1.789
CCAAT/CEBP	same	-3.5	46	50.0542	54.2448	7.3651	0.313985	0.474762	-0.550458	0.905872	55.2552	59.8813	7.43339
CCAAT/CEBP	opp	-2.5	1	0.576939	0.627302	0.792024	0.114368	0.420846	0.534152	0.946666	0.609443	0.662643	0.780668
CCAAT/CEBP	same	-2.5	245	239.166	270.342	16.4421	0.337786	0.474762	0.354817	0.905872	264.018	298.433	16.2486
CCAAT/CEBP	same	-1.5	24	29.4869	33.2306	5.7646	0.180233	0.474762	-0.95182	0.905872	32.5508	36.6835	5.70533
CCAAT/CEBP	opp	-1.5	149	153.374	167.933	12.9589	0.381856	0.505225	-0.337522	0.946666	162.015	177.394	12.7285
CCAAT/CEBP	same	-0.5	28	24.8754	26.7551	5.17253	0.228782	0.474762	0.604078	0.905872	27.4602	29.5352	5.24024
CCAAT/CEBP	opp	-0.5	76	74.6765	83.8546	9.15721	0.409279	0.510116	0.144527	0.946666	78.8837	88.5788	8.88165
CCAAT/CEBP	opp	0.5	34	32.7682	34.4957	5.8733	0.37112	0.498693	0.20973	0.907741	35.3409	37.204	5.94482
CCAAT/CEBP	same	0.5	0	0	0	0	1	1	0	0.919654	0	0	0
CCAAT/CEBP	opp	1.5	40	39.877	45.58	6.7513	0.450337	0.514935	0.0182256	0.907741	43.9299	50.2126	6.62796
CCAAT/CEBP	same	1.5	0	0	0	0	1	1	0	0.919654	0	0	0
CCAAT/CEBP	opp	2.5	36	30.9517	34.6463	5.88611	0.15896	0.466987	0.85767	0.907741	34.0975	38.1676	5.8393
CCAAT/CEBP	same	2.5	23	20.8964	22.0266	4.69325	0.276178	0.474762	0.448227	0.919654	22.722	23.9509	4.76676
CCAAT/CEBP	opp	3.5	393	331.384	367.931	19.1815	0.000446754	0.0384208	3.21226	0.907741	365.064	405.326	19.1067
CCAAT/CEBP	same	3.5	0	0	0	0	1	1	0	0.919654	0	0	0
CCAAT/CEBP	opp	4.5	54	53.4533	57.5836	7.58839	0.434286	0.510576	0.0720434	0.907741	58.8861	63.4362	7.67373
CCAAT/CEBP	same	4.5	0	0.488673	0.513968	0.716916	0.61344	0.624329	-0.681633	0.919654	0.531366	0.558871	0.728949
CCAAT/CEBP	same	5.5	149	109.618	116.182	10.7788	0.000145853	0.0250866	3.65363	0.919654	119.195	126.332	10.9177
CCAAT/CEBP	opp	5.5	41	46.9431	51.744	7.19333	0.216026	0.474762	-0.826191	0.907741	51.7142	57.0031	7.19126
CCAAT/CEBP	same	6.5	71	84.1964	91.4229	9.56153	0.0804344	0.374498	-1.38016	0.919654	91.5523	99.41	9.56829
CCAAT/CEBP	opp	6.5	119	105.412	119.11	10.9138	0.0870574	0.383945	1.24504	0.907741	116.126	131.216	10.7762
CCAAT/CEBP	same	7.5	138	114.684	126.735	11.2577	0.0150774	0.202648	2.07116	0.919654	124.703	137.808	11.167
CCAAT/CEBP	opp	7.5	84	78.6548	86.2307	9.28605	0.251509	0.474762	0.575615	0.907741	86.649	94.9949	9.30854
CCAAT/CEBP	same	8.5	104	98.872	109.543	10.4663	0.281842	0.474762	0.489953	0.919654	107.51	119.113	10.3687
CCAAT/CEBP	opp	8.5	86	88.5924	98.3143	9.91536	0.418634	0.510576	-0.261457	0.907741	97.5966	108.307	9.8791
CCAAT/CEBP	same	9.5	103	97.8029	107.903	10.3876	0.278493	0.474762	0.500315	0.919654	106.347	117.33	10.3125
CCAAT/CEBP	opp	9.5	91	92.2439	101.289	10.0642	0.476016	0.514935	-0.123593	0.907741	101.619	111.583	10.0806
CCAAT/CEBP	same	10.5	94	95.4565	105.735	10.2827	0.467739	0.514935	-0.141645	0.919654	103.796	114.972	10.188
CCAAT/CEBP	opp	10.5	86	86.796	95.8404	9.78981	0.494467	0.523082	-0.0813138	0.907741	95.6176	105.581	9.77843
CCAAT/CEBP	opp	11.5	104	96.5537	106.561	10.3228	0.207619	0.474762	0.72134	0.907741	106.367	117.391	10.3134
CCAAT/CEBP	same	11.5	94	99.4856	109.975	10.4869	0.313044	0.474762	-0.523092	0.919654	108.177	119.583	10.4008
CCAAT/CEBP	opp	12.5	87	94.8081	104.588	10.2268	0.228695	0.474762	-0.76349	0.907741	104.444	115.218	10.2198
CCAAT/CEBP	same	12.5	105	106.452	118.044	10.8648	0.46961	0.514935	-0.133678	0.919654	115.753	128.357	10.7588
CCAAT/CEBP	same	13.5	82	88.2813	97.356	9.86692	0.27284	0.474762	-0.6366	0.919654	95.994	105.862	9.79765
CCAAT/CEBP	opp	13.5	100	95.2356	105.687	10.2804	0.290634	0.474762	0.463445	0.907741	104.915	116.428	10.2428
CCAAT/CEBP	opp	14.5	102	92.848	102.332	10.1159	0.158155	0.466987	0.90471	0.907741	102.285	112.733	10.1136
CCAAT/CEBP	same	14.5	97	90.5812	99.9066	9.99533	0.231078	0.474762	0.642175	0.919654	98.4949	108.635	9.92446
CCAAT/CEBP	opp	15.5	105	92.0478	101.733	10.0863	0.082738	0.374498	1.28414	0.907741	101.403	112.072	10.0699
CCAAT/CEBP	same	15.5	104	96.9221	107.011	10.3446	0.218656	0.474762	0.684207	0.919654	105.39	116.36	10.266
CCAAT/CEBP	same	16.5	60	87.6147	96.5844	9.82774	0.0011416	0.050851	-2.80987	0.919654	95.2692	105.023	9.76059
CCAAT/CEBP	opp	16.5	96	89.6363	98.9572	9.94773	0.231658	0.474762	0.639709	0.907741	98.7466	109.015	9.93713
CCAAT/CEBP	same	17.5	75	94.7197	104.542	10.2246	0.0211687	0.242734	-1.92866	0.919654	102.995	113.676	10.1486
CCAAT/CEBP	opp	17.5	87	93.3477	103.585	10.1777	0.276162	0.474762	-0.623692	0.907741	102.835	114.113	10.1408
CCAAT/CEBP	same	18.5	102	88.8255	97.8905	9.89396	0.0759043	0.373015	1.33157	0.919654	96.5857	106.443	9.8278
CCAAT/CEBP	opp	18.5	93	89.2829	98.5507	9.92727	0.322621	0.474762	0.374435	0.907741	98.3572	108.567	9.91752
CCAAT/CEBP	opp	19.5	88	101.832	112.694	10.6157	0.0909734	0.391186	-1.303	0.907741	112.182	124.147	10.5916
CCAAT/CEBP	same	19.5	99	89.8489	99.5808	9.97902	0.154337	0.466987	0.917029	0.919654	97.6986	108.281	9.88426
CCAAT/CEBP	opp	20.5	88	99.9306	110.791	10.5257	0.125209	0.439509	-1.13347	0.907741	110.087	122.052	10.4922
CCAAT/CEBP	same	20.5	103	92.9016	102.813	10.1397	0.136407	0.45823	0.995923	0.919654	101.018	111.796	10.0508
CCAAT/CEBP	same	21.5	104	96.5814	106.534	10.3215	0.208438	0.474762	0.718746	0.919654	105.019	115.842	10.2479
CCAAT/CEBP	opp	21.5	97	95.2595	105.42	10.2674	0.402958	0.510116	0.169517	0.907741	104.941	116.135	10.2441
CCAAT/CEBP	same	22.5	103	97.9338	107.993	10.392	0.282998	0.474762	0.48751	0.919654	106.49	117.428	10.3194
CCAAT/CEBP	opp	22.5	94	94.9525	105.18	10.2558	0.488297	0.523082	-0.0928776	0.907741	104.603	115.871	10.2276
CCAAT/CEBP	opp	23.5	94	97.2249	107.558	10.371	0.397178	0.510116	-0.310958	0.907741	107.107	118.49	10.3492
CCAAT/CEBP	same	23.5	101	102.592	113.382	10.6481	0.463541	0.514935	-0.149527	0.919654	111.555	123.287	10.562
CCAAT/CEBP	same	24.5	91	95.8225	105.808	10.2863	0.334407	0.474762	-0.468826	0.919654	104.194	115.052	10.2075
CCAAT/CEBP	opp	24.5	98	94.8513	104.494	10.2222	0.348524	0.475763	0.308029	0.907741	104.492	115.114	10.2221
CCAAT/CEBP	same	25.5	81	92.6719	102.691	10.1337	0.121527	0.435472	-1.1518	0.919654	100.768	111.663	10.0383
CCAAT/CEBP	opp	25.5	90	95.7555	105.643	10.2783	0.299832	0.474762	-0.559966	0.907741	105.488	116.38	10.2707
CCAAT/CEBP	opp	26.5	115	97.5218	107.796	10.3825	0.0371391	0.292905	1.68343	0.907741	107.434	118.752	10.365
CCAAT/CEBP	same	26.5	81	86.2993	95.0925	9.75154	0.307346	0.474762	-0.543431	0.919654	93.8388	103.4	9.68704
CCAAT/CEBP	same	27.5	100	88.6057	97.3618	9.86721	0.104894	0.41004	1.15476	0.919654	96.3467	105.868	9.81564
CCAAT/CEBP	opp	27.5	96	100.958	111.349	10.5522	0.333512	0.474762	-0.469817	0.907741	111.219	122.666	10.546
CCAAT/CEBP	same	28.5	123	96.0758	106.15	10.3029	0.00352187	0.0865373	2.61326	0.919654	104.469	115.424	10.221
CCAAT/CEBP	opp	28.5	92	97.2342	107.114	10.3496	0.320243	0.474762	-0.50574	0.907741	107.117	118.001	10.3497
CCAAT/CEBP	same	29.5	117	108.664	120.682	10.9856	0.197009	0.474762	0.758844	0.919654	118.157	131.226	10.87
CCAAT/CEBP	opp	29.5	97	95.3514	105.252	10.2592	0.406622	0.510116	0.160695	0.907741	105.043	115.949	10.249
CCAAT/CEBP	opp	30.5	103	98.507	108.805	10.4309	0.303074	0.474762	0.430737	0.907741	108.519	119.863	10.4172
CCAAT/CEBP	same	30.5	96	97.7218	108.061	10.3952	0.457417	0.514935	-0.165637	0.919654	106.259	117.502	10.3082
CCAAT/CEBP	same	31.5	64	88.8799	97.8435	9.89159	0.00345028	0.0865373	-2.51526	0.919654	96.6449	106.392	9.83081
CCAAT/CEBP	opp	31.5	78	97.0594	107.202	10.3538	0.026698	0.270121	-1.8408	0.907741	106.924	118.097	10.3404
CCAAT/CEBP	opp	32.5	123	99.4036	109.602	10.4691	0.00953801	0.182282	2.25391	0.907741	109.507	120.741	10.4645
CCAAT/CEBP	same	32.5	98	89.6553	98.5567	9.92757	0.174459	0.474762	0.840559	0.919654	97.488	107.167	9.8736
CCAAT/CEBP	opp	33.5	96	103.965	114.798	10.7144	0.234349	0.474762	-0.743399	0.907741	114.532	126.466	10.7019
CCAAT/CEBP	same	33.5	85	89.4551	99.0749	9.95364	0.34328	0.474762	-0.447581	0.919654	97.2703	107.731	9.86257
CCAAT/CEBP	opp	34.5	89	104.482	115.519	10.748	0.0686043	0.368748	-1.44045	0.907741	115.101	127.26	10.7285
CCAAT/CEBP	same	34.5	96	93.9765	104.56	10.2255	0.391161	0.510116	0.197886	0.919654	102.187	113.695	10.1087
CCAAT/CEBP	opp	35.5	119	100.746	111.351	10.5523	0.0335706	0.292905	1.72989	0.907741	110.985	122.668	10.5349
CCAAT/CEBP	same	35.5	91	87.867	96.8694	9.84222	0.343611	0.474762	0.318321	0.919654	95.5435	105.332	9.77464
CCAAT/CEBP	same	36.5	107	91.972	101.277	10.0636	0.055528	0.352843	1.49329	0.919654	100.007	110.125	10.0004
CCAAT/CEBP	opp	36.5	102	96.7247	106.725	10.3308	0.27481	0.474762	0.510643	0.907741	106.555	117.572	10.3226
CCAAT/CEBP	opp	37.5	109	95.7347	105.449	10.2689	0.0820094	0.374498	1.29179	0.907741	105.465	116.167	10.2696
CCAAT/CEBP	same	37.5	107	99.9142	110.156	10.4955	0.221814	0.474762	0.675124	0.919654	108.643	119.78	10.4232
CCAAT/CEBP	opp	38.5	95	100.198	110.849	10.5285	0.3241	0.474762	-0.4937	0.907741	110.382	122.115	10.5063
CCAAT/CEBP	same	38.5	91	94.3202	104.094	10.2027	0.391818	0.510116	-0.325427	0.919654	102.561	113.188	10.1272
CCAAT/CEBP	opp	39.5	84	100.789	111.587	10.5635	0.0492312	0.338711	-1.58935	0.907741	111.033	122.928	10.5372
CCAAT/CEBP	same	39.5	90	88.2674	97.6192	9.88025	0.39962	0.510116	0.175359	0.919654	95.9789	106.148	9.79688
CCAAT/CEBP	opp	40.5	120	105.595	117.025	10.8178	0.0757673	0.373015	1.33164	0.907741	116.327	128.919	10.7855
CCAAT/CEBP	same	40.5	93	89.8615	99.322	9.96604	0.345031	0.474762	0.314924	0.919654	97.7122	107.999	9.88495
CCAAT/CEBP	opp	41.5	115	99.0175	109.504	10.4644	0.0515817	0.341233	1.52732	0.907741	109.081	120.633	10.4442
CCAAT/CEBP	same	41.5	83	89.8394	99.2482	9.96234	0.254911	0.474762	-0.686529	0.919654	97.6883	107.919	9.88374
CCAAT/CEBP	same	42.5	108	95.6555	105.431	10.2679	0.0964361	0.394929	1.20223	0.919654	104.012	114.642	10.1987
CCAAT/CEBP	opp	42.5	104	97.5519	107.628	10.3744	0.238215	0.474762	0.621536	0.907741	107.467	118.567	10.3666
CCAAT/CEBP	same	43.5	119	91.5559	100.853	10.0426	0.00251785	0.0865373	2.73278	0.919654	99.5546	109.664	9.97771
CCAAT/CEBP	opp	43.5	96	102.769	113.597	10.6582	0.271515	0.474762	-0.635119	0.907741	113.214	125.142	10.6402
CPEB1	same	-41.5	11	13.6064	15.0387	3.87797	0.294631	0.492732	-0.672107	0.790852	17.2048	19.0158	4.14786
CPEB1	opp	-41.5	12	12.1357	13.28	3.64418	0.560447	0.589649	-0.0372423	0.77743	15.61	17.082	3.95095
CPEB1	same	-40.5	6	11.5326	12.5479	3.54231	0.0592181	0.331149	-1.56185	0.790852	14.5825	15.8663	3.8187
CPEB1	opp	-40.5	11	11.3916	12.6493	3.55659	0.532629	0.585561	-0.110095	0.77743	14.6528	16.2707	3.8279
CPEB1	opp	-39.5	10	12.2315	13.5634	3.68285	0.323438	0.492732	-0.605912	0.77743	15.7332	17.4465	3.96651
CPEB1	same	-39.5	10	11.5785	12.7742	3.5741	0.392914	0.493293	-0.44164	0.790852	14.6405	16.1525	3.82629
CPEB1	same	-38.5	15	10.7988	11.878	3.44645	0.0822607	0.348384	1.219	0.790852	13.6546	15.0193	3.69522
CPEB1	opp	-38.5	13	12.4542	13.8084	3.71597	0.367181	0.492732	0.146885	0.77743	16.0197	17.7616	4.00246
CPEB1	same	-37.5	16	12.168	13.4959	3.67367	0.110667	0.352993	1.0431	0.790852	15.3859	17.065	3.92249
CPEB1	opp	-37.5	15	12.7827	14.1397	3.76028	0.217494	0.460408	0.589676	0.77743	16.4422	18.1877	4.0549
CPEB1	same	-36.5	16	13.5584	14.9861	3.87119	0.207134	0.460408	0.630719	0.790852	17.144	18.9494	4.14053
CPEB1	opp	-36.5	11	12.8124	14.2691	3.77744	0.372473	0.492732	-0.479795	0.77743	16.4804	18.3541	4.05961
CPEB1	opp	-35.5	6	13.72	15.3376	3.91633	0.0168676	0.331149	-1.97123	0.77743	17.6478	19.7286	4.20093
CPEB1	same	-35.5	7	11.533	12.7925	3.57666	0.111981	0.352993	-1.26739	0.790852	14.583	16.1756	3.81877
CPEB1	same	-34.5	7	11.9002	13.1924	3.63214	0.0939537	0.352993	-1.34913	0.790852	15.0474	16.6813	3.87909
CPEB1	opp	-34.5	19	14.6309	16.2456	4.03059	0.105223	0.352993	1.08398	0.77743	18.8196	20.8966	4.33815
CPEB1	opp	-33.5	13	12.4642	13.7889	3.71334	0.368267	0.492732	0.144299	0.77743	16.0325	17.7365	4.00406
CPEB1	same	-33.5	11	11.0806	12.2218	3.49596	0.569647	0.591413	-0.0230521	0.790852	14.011	15.4539	3.74312
CPEB1	opp	-32.5	10	13.4529	14.8743	3.85672	0.214823	0.460408	-0.895306	0.77743	17.3044	19.1326	4.15985
CPEB1	same	-32.5	12	12.328	13.6576	3.69561	0.538506	0.585561	-0.0887573	0.790852	15.5883	17.2694	3.9482
CPEB1	opp	-31.5	9	12.6501	13.91	3.72961	0.190185	0.460408	-0.978686	0.77743	16.2717	17.8923	4.03382
CPEB1	same	-31.5	13	12.4102	13.7619	3.70971	0.36241	0.492732	0.158982	0.790852	15.6922	17.4014	3.96134
CPEB1	same	-30.5	12	14.2652	15.8739	3.9842	0.332863	0.492732	-0.568549	0.790852	18.0378	20.0719	4.24709
CPEB1	opp	-30.5	13	14.2758	15.9369	3.99211	0.435529	0.508302	-0.319572	0.77743	18.3628	20.4995	4.28518
CPEB1	same	-29.5	20	14.1296	15.6791	3.95968	0.0517187	0.331149	1.48254	0.790852	17.8663	19.8255	4.22686
CPEB1	opp	-29.5	11	14.6804	16.492	4.06103	0.206849	0.460408	-0.906267	0.77743	18.8832	21.2134	4.34548
CPEB1	same	-28.5	14	12.5328	13.935	3.73297	0.278167	0.492732	0.393027	0.790852	15.8473	17.6203	3.98086
CPEB1	opp	-28.5	14	14.5587	16.1985	4.02473	0.511437	0.56753	-0.138813	0.77743	18.7267	20.8359	4.32743
CPEB1	same	-27.5	20	13.3185	14.6046	3.8216	0.0311332	0.331149	1.74836	0.790852	16.8407	18.467	4.10374
CPEB1	opp	-27.5	9	14.0787	15.6705	3.9586	0.105726	0.352993	-1.28295	0.77743	18.1092	20.1569	4.2555
CPEB1	opp	-26.5	18	13.8129	15.3056	3.91223	0.107263	0.352993	1.07025	0.77743	17.7674	19.6874	4.21514
CPEB1	same	-26.5	12	12.2456	13.3109	3.64841	0.547905	0.588108	-0.0673055	0.790852	15.484	16.8311	3.93497
CPEB1	same	-25.5	8	11.7526	12.8869	3.58983	0.171917	0.460408	-1.04534	0.790852	14.8607	16.2949	3.85495
CPEB1	opp	-25.5	14	13.8658	15.316	3.91357	0.415338	0.504729	0.0343018	0.77743	17.8354	19.7009	4.22319
CPEB1	opp	-24.5	18	14.8073	16.4431	4.05501	0.167184	0.456439	0.787356	0.77743	19.0464	21.1506	4.36422
CPEB1	same	-24.5	13	12.9219	14.2492	3.77481	0.418364	0.504729	0.0207029	0.790852	16.3392	18.0176	4.04217
CPEB1	same	-23.5	9	11.1904	12.2562	3.50088	0.320206	0.492732	-0.625682	0.790852	14.1499	15.4974	3.76163
CPEB1	opp	-23.5	11	11.7601	13.0052	3.60628	0.489286	0.553666	-0.210779	0.77743	15.1269	16.7285	3.88933
CPEB1	same	-22.5	16	11.2215	12.3409	3.51296	0.064462	0.331149	1.36025	0.790852	14.1891	15.6046	3.76684
CPEB1	opp	-22.5	13	13.0984	14.5443	3.8137	0.562224	0.589649	-0.0258113	0.77743	16.8484	18.7082	4.10468
CPEB1	opp	-21.5	19	13.3422	14.8769	3.85706	0.0527149	0.331149	1.46688	0.77743	17.1619	19.136	4.14269
CPEB1	same	-21.5	10	11.8936	13.2246	3.63656	0.358477	0.492732	-0.520724	0.790852	15.039	16.722	3.87802
CPEB1	same	-20.5	5	10.7918	11.7842	3.43281	0.0424604	0.331149	-1.68719	0.790852	13.6458	14.9006	3.69402
CPEB1	opp	-20.5	12	10.9281	12.0416	3.4701	0.303462	0.492732	0.308896	0.77743	14.0567	15.4889	3.74923
CPEB1	opp	-19.5	14	13.5407	15.148	3.89204	0.381008	0.492732	0.118007	0.77743	17.4173	19.4847	4.1734
CPEB1	same	-19.5	11	12.3733	13.5952	3.68717	0.419629	0.504729	-0.372465	0.790852	15.6456	17.1906	3.95545
CPEB1	opp	-18.5	5	11.3509	12.6669	3.55906	0.0303663	0.331149	-1.78444	0.77743	14.6006	16.2933	3.82107
CPEB1	same	-18.5	18	12.9098	14.2832	3.77932	0.0663136	0.331149	1.34686	0.790852	16.3239	18.0606	4.04029
CPEB1	same	-17.5	9	12.4195	13.6995	3.70128	0.207658	0.460408	-0.923875	0.790852	15.704	17.3224	3.96282
CPEB1	opp	-17.5	15	12.8872	14.257	3.77584	0.226501	0.461768	0.559558	0.77743	16.5767	18.3386	4.07144
CPEB1	same	-16.5	10	12.542	13.9371	3.73324	0.293078	0.492732	-0.680902	0.790852	15.8588	17.6229	3.98231
CPEB1	opp	-16.5	15	14.2686	15.9195	3.98992	0.357447	0.492732	0.1833	0.77743	18.3536	20.4771	4.28411
CPEB1	same	-15.5	14	12.0865	13.3332	3.65146	0.235859	0.461768	0.524037	0.790852	15.2829	16.8592	3.90933
CPEB1	opp	-15.5	11	13.9356	15.2763	3.90849	0.26551	0.49105	-0.751083	0.77743	17.9252	19.6498	4.23382
CPEB1	same	-14.5	15	12.3431	13.5945	3.68707	0.181466	0.460408	0.720595	0.790852	15.6074	17.1897	3.95062
CPEB1	opp	-14.5	11	13.6536	15.1274	3.8894	0.290342	0.492732	-0.682255	0.77743	17.5624	19.4582	4.19075
CPEB1	opp	-13.5	15	12.7836	14.1578	3.76269	0.217579	0.460408	0.589035	0.77743	16.4435	18.211	4.05505
CPEB1	same	-13.5	12	13.7929	15.2999	3.91151	0.379135	0.492732	-0.45837	0.790852	17.4406	19.3461	4.17619
CPEB1	same	-12.5	18	13.7995	15.3682	3.92023	0.106562	0.352993	1.07148	0.790852	17.449	19.4325	4.17719
CPEB1	opp	-12.5	11	11.3645	12.5474	3.54223	0.535839	0.585561	-0.102902	0.77743	14.618	16.1395	3.82335
CPEB1	same	-11.5	12	13.238	14.8045	3.84766	0.437191	0.508302	-0.321761	0.790852	16.7389	18.7197	4.09133
CPEB1	opp	-11.5	12	12.625	13.7706	3.71087	0.504863	0.567202	-0.168421	0.77743	16.2394	17.713	4.02981
CPEB1	opp	-10.5	16	12.1591	13.6426	3.69358	0.110157	0.352993	1.03989	0.77743	15.6401	17.5483	3.95476
CPEB1	same	-10.5	16	12.1645	13.281	3.6443	0.110466	0.352993	1.05247	0.790852	15.3815	16.7932	3.92192
CPEB1	opp	-9.5	11	13.3023	14.7433	3.8397	0.323218	0.492732	-0.599604	0.77743	17.1106	18.9641	4.1365
CPEB1	same	-9.5	10	12.2334	13.4007	3.66069	0.323242	0.492732	-0.610112	0.790852	15.4687	16.9446	3.93302
CPEB1	same	-8.5	10	13.4372	14.9386	3.86505	0.216032	0.460408	-0.889315	0.790852	16.9908	18.8892	4.122
CPEB1	opp	-8.5	11	12.2608	13.5153	3.67632	0.432112	0.508302	-0.342963	0.77743	15.771	17.3846	3.97127
CPEB1	same	-7.5	18	13.099	14.3503	3.78817	0.073839	0.344167	1.29376	0.790852	16.5632	18.1453	4.06979
CPEB1	opp	-7.5	8	12.1045	13.303	3.64733	0.148298	0.418153	-1.12535	0.77743	15.5699	17.1115	3.94587
CPEB1	opp	-6.5	20	13.4125	14.9911	3.87183	0.0331386	0.331149	1.7014	0.77743	17.2523	19.2828	4.15359
CPEB1	same	-6.5	18	12.0181	13.4653	3.66951	0.0378809	0.331149	1.63017	0.790852	15.1964	17.0263	3.89825
CPEB1	opp	-5.5	6	13.7883	15.1833	3.89658	0.0161847	0.331149	-1.99875	0.77743	17.7357	19.5301	4.21138
CPEB1	same	-5.5	11	8.118	8.98089	2.99681	0.12063	0.36343	0.961689	0.790852	10.2649	11.356	3.20388
CPEB1	opp	-4.5	5	10.452	11.4434	3.38281	0.0518035	0.331149	-1.61168	0.77743	13.4443	14.7195	3.66665
CPEB1	same	-4.5	10	11.0867	11.9639	3.45889	0.449578	0.518976	-0.314182	0.790852	14.0187	15.1279	3.74416
CPEB1	opp	-3.5	4	8.85225	9.84872	3.13827	0.0601575	0.331149	-1.54616	0.77743	11.3866	12.6683	3.3744
CPEB1	same	-3.5	16	17.0641	18.2005	4.2662	0.461578	0.529276	-0.249426	0.790852	21.5769	23.0138	4.64509
CPEB1	opp	-2.5	8	17.768	19.6729	4.43541	0.0080867	0.331149	-2.20226	0.77743	22.8547	25.305	4.78066
CPEB1	same	-2.5	10	9.9443	11.1217	3.33491	0.409992	0.504729	0.0167009	0.790852	12.5742	14.0629	3.54601
CPEB1	opp	-1.5	30	35.4301	38.2539	6.18497	0.206141	0.460408	-0.877957	0.77743	45.5734	49.2056	6.75081
CPEB1	same	-1.5	0	0	0	0	1	1	0	0.790852	0	0	0
CPEB1	opp	-0.5	0	0	0	0	1	1	0	0.77743	0	0	0
CPEB1	same	-0.5	0	0	0	0	1	1	0	0.790852	0	0	0
CPEB1	same	0.5	9	4.01686	4.48589	2.11799	0.00835765	0.331149	2.35277	0.994095	4.50081	5.02636	2.12151
CPEB1	opp	0.5	0	0	0	0	1	1	0	0.914374	0	0	0
CPEB1	opp	1.5	98	113.735	129.72	11.3895	0.0740358	0.344167	-1.38156	0.914374	124.386	141.868	11.1528
CPEB1	same	1.5	0	0	0	0	1	1	0	0.994095	0	0	0
CPEB1	opp	2.5	61	55.5966	61.0209	7.81159	0.211763	0.460408	0.691712	0.914374	60.8029	66.7352	7.79762
CPEB1	same	2.5	0	0	0	0	1	1	0	0.994095	0	0	0
CPEB1	opp	3.5	42	38.4662	41.6742	6.45556	0.252707	0.473727	0.547411	0.914374	42.0683	45.5768	6.48601
CPEB1	same	3.5	1	1.74462	1.87477	1.36922	0.479515	0.546203	-0.543829	0.994095	1.75499	1.8859	1.32476
CPEB1	same	4.5	4	2.36134	2.51226	1.58501	0.0910827	0.352993	1.03385	0.994095	2.37536	2.52718	1.54122
CPEB1	opp	4.5	26	31.2275	34.4745	5.8715	0.201008	0.460408	-0.890312	0.914374	34.1517	37.7029	5.84395
CPEB1	opp	5.5	6	12.005	13.1206	3.62223	0.045694	0.331149	-1.65783	0.914374	13.1292	14.3492	3.62343
CPEB1	same	5.5	10	13.4798	14.4334	3.79913	0.212766	0.460408	-0.915944	0.994095	13.5599	14.5191	3.68237
CPEB1	same	6.5	3	13.5143	14.3027	3.78189	0.000698973	0.120223	-2.78018	0.994095	13.5946	14.3877	3.68709
CPEB1	opp	6.5	16	9.53097	10.5954	3.25506	0.0182202	0.331149	1.98738	0.914374	10.4235	11.5876	3.22854
CPEB1	same	7.5	12	15.1747	16.8018	4.099	0.253389	0.473727	-0.774508	0.994095	15.2648	16.9016	3.90702
CPEB1	opp	7.5	17	15.8903	17.6048	4.19581	0.330451	0.492732	0.264473	0.914374	17.3784	19.2534	4.16874
CPEB1	opp	8.5	13	16.0164	17.7974	4.21869	0.273177	0.492732	-0.715011	0.914374	17.5163	19.464	4.18524
CPEB1	same	8.5	15	17.6041	19.9102	4.46208	0.318772	0.492732	-0.583603	0.994095	17.7086	20.0284	4.20816
CPEB1	opp	9.5	9	16.3735	18.0877	4.25297	0.03596	0.331149	-1.73374	0.914374	17.9068	19.7815	4.23165
CPEB1	same	9.5	21	15.7861	17.4797	4.18087	0.0804185	0.348384	1.24707	0.994095	15.8799	17.5835	3.98496
CPEB1	same	10.5	16	14.9925	16.523	4.06485	0.335152	0.492732	0.247868	0.994095	15.0815	16.6212	3.88349
CPEB1	opp	10.5	19	17.8685	20.1174	4.48525	0.337471	0.492732	0.252264	0.914374	19.5418	22.0013	4.42061
CPEB1	same	11.5	23	16.7175	18.45	4.29534	0.0547084	0.331149	1.46262	0.994095	16.8168	18.5596	4.10083
CPEB1	opp	11.5	20	16.2787	18.237	4.27048	0.147958	0.418153	0.871392	0.914374	17.8032	19.9448	4.21938
CPEB1	opp	12.5	20	13.9419	15.3585	3.91899	0.046268	0.331149	1.54583	0.914374	15.2475	16.7967	3.9048
CPEB1	same	12.5	15	16.9433	18.8463	4.34123	0.376611	0.492732	-0.447632	0.994095	17.0439	18.9583	4.12843
CPEB1	same	13.5	14	16.3077	18.1806	4.26387	0.339473	0.492732	-0.541222	0.994095	16.4046	18.2886	4.05025
CPEB1	opp	13.5	12	12.0453	13.232	3.63759	0.570782	0.591413	-0.0124583	0.914374	13.1733	14.4711	3.6295
CPEB1	opp	14.5	18	12.7774	14.0678	3.75071	0.0613703	0.331149	1.39243	0.914374	13.9739	15.3852	3.73817
CPEB1	same	14.5	12	15.2219	16.7913	4.09772	0.249632	0.473727	-0.786275	0.994095	15.3123	16.891	3.9131
CPEB1	same	15.5	11	16.3181	17.8844	4.22899	0.111987	0.352993	-1.25753	0.994095	16.415	17.9906	4.05154
CPEB1	opp	15.5	18	15.6225	17.282	4.15716	0.227097	0.461768	0.5719	0.914374	17.0855	18.9003	4.13346
CPEB1	same	16.5	19	15.8244	17.621	4.19774	0.175684	0.460408	0.756492	0.994095	15.9184	17.7257	3.98979
CPEB1	opp	16.5	18	16.7232	18.758	4.33104	0.320096	0.492732	0.294799	0.914374	18.2892	20.5145	4.27659
CPEB1	same	17.5	13	16.5018	18.6034	4.31316	0.235614	0.461768	-0.811879	0.994095	16.5998	18.7139	4.07428
CPEB1	opp	17.5	18	17.3099	19.169	4.37824	0.373452	0.492732	0.157623	0.914374	18.9309	20.9641	4.35096
CPEB1	same	18.5	19	14.8189	16.558	4.06915	0.114928	0.352993	1.02752	0.994095	14.9069	16.6563	3.86094
CPEB1	opp	18.5	13	15.8729	17.4567	4.17813	0.284979	0.492732	-0.687602	0.914374	17.3593	19.0915	4.16645
CPEB1	opp	19.5	18	15.2605	16.8635	4.10651	0.199394	0.460408	0.667108	0.914374	16.6896	18.4426	4.08529
CPEB1	same	19.5	15	15.2617	16.9247	4.11396	0.541304	0.585561	-0.0636092	0.994095	15.3523	17.0252	3.91821
CPEB1	same	20.5	23	15.5913	17.1547	4.14183	0.0286378	0.331149	1.78876	0.994095	15.6839	17.2566	3.96029
CPEB1	opp	20.5	11	13.0883	14.5692	3.81696	0.34427	0.492732	-0.547099	0.914374	14.3139	15.9335	3.78337
CPEB1	opp	21.5	7	14.489	16.0176	4.0022	0.0240845	0.331149	-1.87123	0.914374	15.8458	17.5175	3.98068
CPEB1	same	21.5	17	18.8724	21.1931	4.60359	0.389451	0.493293	-0.406723	0.994095	18.9845	21.3189	4.35712
CPEB1	same	22.5	12	17.2231	18.976	4.35615	0.124155	0.36343	-1.19902	0.994095	17.3254	19.0887	4.16238
CPEB1	opp	22.5	18	14.9802	16.6646	4.08223	0.179134	0.460408	0.739739	0.914374	16.383	18.2252	4.0476
CPEB1	opp	23.5	10	16.3681	18.148	4.26005	0.0656836	0.331149	-1.49483	0.914374	17.9008	19.8475	4.23094
CPEB1	same	23.5	12	15.6194	17.1791	4.14476	0.219497	0.460408	-0.873241	0.994095	15.7122	17.2811	3.96386
CPEB1	opp	24.5	12	14.3159	15.8391	3.97984	0.328086	0.492732	-0.581917	0.914374	15.6565	17.3224	3.95683
CPEB1	same	24.5	14	16.0233	17.9783	4.24008	0.365363	0.492732	-0.477184	0.994095	16.1185	18.0851	4.01478
CPEB1	same	25.5	10	15.4417	17.1354	4.1395	0.0985271	0.352993	-1.31458	0.994095	15.5334	17.2372	3.94124
CPEB1	opp	25.5	15	14.1925	15.6172	3.95186	0.349801	0.492732	0.204346	0.914374	15.5215	17.0797	3.93973
CPEB1	same	26.5	8	16.2754	18.0726	4.25119	0.0189042	0.331149	-1.94661	0.994095	16.3721	18.18	4.04624
CPEB1	opp	26.5	15	15.1718	16.6272	4.07765	0.550497	0.588108	-0.0421329	0.914374	16.5926	18.1843	4.0734
CPEB1	opp	27.5	23	15.8972	17.5542	4.18977	0.034519	0.331149	1.69528	0.914374	17.3859	19.198	4.16964
CPEB1	same	27.5	9	15.6444	17.2477	4.15304	0.0514925	0.331149	-1.59988	0.994095	15.7373	17.3502	3.96702
CPEB1	same	28.5	10	15.8392	17.4337	4.17537	0.0830451	0.348384	-1.3985	0.994095	15.9333	17.5373	3.99166
CPEB1	opp	28.5	15	16.7811	18.6242	4.31558	0.391537	0.493293	-0.412721	0.914374	18.3526	20.3683	4.28399
CPEB1	same	29.5	9	15.2393	16.7034	4.08698	0.0624623	0.331149	-1.52662	0.994095	15.3298	16.8026	3.91533
CPEB1	opp	29.5	11	16.2762	17.9681	4.23888	0.113877	0.352993	-1.24471	0.914374	17.8003	19.6507	4.21904
CPEB1	same	30.5	13	16.3306	18.1157	4.25625	0.248444	0.473727	-0.78252	0.994095	16.4276	18.2233	4.0531
CPEB1	opp	30.5	14	14.593	16.0189	4.00237	0.507844	0.567202	-0.148158	0.914374	15.9595	17.519	3.99494
CPEB1	opp	31.5	5	12.9408	14.1444	3.7609	0.0111556	0.331149	-2.11141	0.914374	14.1526	15.4689	3.762
CPEB1	same	31.5	8	15.8416	17.501	4.18342	0.023963	0.331149	-1.87445	0.994095	15.9357	17.605	3.99195
CPEB1	same	32.5	13	16.8079	18.645	4.31799	0.213809	0.460408	-0.881869	0.994095	16.9077	18.7558	4.1119
CPEB1	opp	32.5	12	13.9776	15.4269	3.92771	0.360664	0.492732	-0.503507	0.914374	15.2866	16.8716	3.9098
CPEB1	same	33.5	20	18.4963	20.5679	4.53518	0.309897	0.492732	0.33156	0.994095	18.6062	20.69	4.31349
CPEB1	opp	33.5	14	15.2788	16.955	4.11764	0.437376	0.508302	-0.310577	0.914374	16.7096	18.5427	4.08774
CPEB1	opp	34.5	11	14.3334	15.9627	3.99534	0.232922	0.461768	-0.834327	0.914374	15.6757	17.4575	3.95925
CPEB1	same	34.5	14	15.9589	17.5799	4.19284	0.371365	0.492732	-0.46719	0.994095	16.0536	17.6843	4.0067
CPEB1	same	35.5	10	16.8287	18.7618	4.33149	0.0532065	0.331149	-1.57652	0.994095	16.9286	18.8732	4.11444
CPEB1	opp	35.5	15	16.8576	18.8728	4.34429	0.384461	0.493293	-0.427606	0.914374	18.4363	20.6402	4.29375
CPEB1	opp	36.5	10	15.9575	17.5394	4.188	0.0788551	0.348384	-1.42253	0.914374	17.4519	19.1818	4.17754
CPEB1	same	36.5	14	14.0964	15.4515	3.93084	0.560222	0.589649	-0.0245207	0.994095	14.1801	15.5433	3.76565
CPEB1	same	37.5	22	15.6039	17.274	4.15619	0.0468606	0.331149	1.53893	0.994095	15.6966	17.3766	3.96189
CPEB1	opp	37.5	11	15.2826	16.6816	4.08431	0.166716	0.456439	-1.04856	0.914374	16.7138	18.2437	4.08825
CPEB1	opp	38.5	9	15.0774	16.6686	4.08272	0.0673849	0.331149	-1.48856	0.914374	16.4893	18.2296	4.0607
CPEB1	same	38.5	15	17.1095	18.8234	4.33859	0.361596	0.492732	-0.486215	0.994095	17.2111	18.9352	4.14863
CPEB1	opp	39.5	12	15.3941	17.2858	4.15762	0.236253	0.461768	-0.816351	0.914374	16.8356	18.9046	4.10313
CPEB1	same	39.5	14	16.557	18.3321	4.2816	0.317614	0.492732	-0.597211	0.994095	16.6554	18.441	4.0811
CPEB1	opp	40.5	12	17.5983	19.3497	4.39883	0.107461	0.352993	-1.27269	0.914374	19.2463	21.1617	4.38706
CPEB1	same	40.5	14	15.584	17.21	4.1485	0.407183	0.504729	-0.381821	0.994095	15.6765	17.3122	3.95936
CPEB1	same	41.5	16	15.2337	17.1073	4.1361	0.35848	0.492732	0.185275	0.994095	15.3242	17.2089	3.91461
CPEB1	opp	41.5	17	16.2592	18.0031	4.243	0.36504	0.492732	0.174593	0.914374	17.7818	19.689	4.21684
CPEB1	opp	42.5	10	14.8751	16.3885	4.04827	0.124665	0.36343	-1.20424	0.914374	16.268	17.9232	4.03337
CPEB1	same	42.5	13	14.5076	16.0964	4.01204	0.411755	0.504729	-0.375774	0.994095	14.5938	16.192	3.82018
CPEB1	same	43.5	14	16.6969	18.3788	4.28705	0.305711	0.492732	-0.629076	0.994095	16.7961	18.488	4.0983
CPEB1	opp	43.5	16	15.953	17.7323	4.21098	0.429376	0.508302	0.0111588	0.914374	17.4469	19.3929	4.17695
CREB/ATF/1	same	-41.5	184	163.356	179.703	13.4053	0.0512158	0.314611	1.53995	0.932609	175.161	192.689	13.2348
CREB/ATF/1	opp	-41.5	171	167.688	184.975	13.6006	0.379777	0.469449	0.243487	0.965679	173.648	191.549	13.1776
CREB/ATF/1	same	-40.5	186	164.222	180.644	13.4404	0.0432716	0.303773	1.62032	0.932609	176.089	193.697	13.2699
CREB/ATF/1	opp	-40.5	166	172.159	189.768	13.7756	0.336915	0.462363	-0.447083	0.965679	178.277	196.513	13.3521
CREB/ATF/1	same	-39.5	171	166.549	183.795	13.5571	0.346553	0.462363	0.328336	0.932609	178.584	197.077	13.3635
CREB/ATF/1	opp	-39.5	169	166.198	182.888	13.5236	0.394274	0.469478	0.207205	0.965679	172.105	189.388	13.1189
CREB/ATF/1	same	-38.5	188	159.556	176.103	13.2704	0.0125535	0.166093	2.14344	0.932609	171.085	188.829	13.08
CREB/ATF/1	opp	-38.5	178	172.828	190.024	13.7849	0.329338	0.462363	0.375195	0.965679	178.97	196.777	13.378
CREB/ATF/1	opp	-37.5	165	169.639	187.336	13.6871	0.37972	0.469449	-0.338918	0.965679	175.668	193.994	13.254
CREB/ATF/1	same	-37.5	156	158.031	174.343	13.2039	0.456714	0.489504	-0.153837	0.932609	169.451	186.941	13.0173
CREB/ATF/1	same	-36.5	168	160.381	176.625	13.29	0.25821	0.44706	0.573297	0.932609	171.97	189.388	13.1137
CREB/ATF/1	opp	-36.5	162	162.637	178.635	13.3654	0.500939	0.510497	-0.047643	0.965679	168.417	184.984	12.9776
CREB/ATF/1	same	-35.5	175	159.047	175.485	13.2471	0.0974824	0.354472	1.20425	0.932609	170.54	188.166	13.0591
CREB/ATF/1	opp	-35.5	167	162.893	179.375	13.3931	0.354836	0.462363	0.306654	0.965679	168.682	185.751	12.9878
CREB/ATF/1	opp	-34.5	153	164.496	180.882	13.4492	0.196553	0.432059	-0.854746	0.965679	170.342	187.311	13.0515
CREB/ATF/1	same	-34.5	168	157.823	173.713	13.18	0.196627	0.432059	0.772183	0.932609	169.227	186.265	13.0087
CREB/ATF/1	same	-33.5	171	162.268	178.592	13.3638	0.23238	0.439223	0.653442	0.932609	173.993	191.497	13.1906
CREB/ATF/1	opp	-33.5	170	161.463	177.481	13.3222	0.236467	0.440231	0.640809	0.965679	167.201	183.789	12.9306
CREB/ATF/1	opp	-32.5	164	169.561	186.58	13.6594	0.352807	0.462363	-0.407123	0.965679	175.587	193.211	13.2509
CREB/ATF/1	same	-32.5	158	161.816	177.883	13.3373	0.401916	0.470752	-0.286087	0.932609	173.509	190.737	13.1723
CREB/ATF/1	opp	-31.5	178	169.527	187.021	13.6756	0.243242	0.440231	0.619579	0.965679	175.552	193.668	13.2496
CREB/ATF/1	same	-31.5	170	167.058	184.433	13.5806	0.390421	0.469478	0.216598	0.932609	179.13	197.76	13.384
CREB/ATF/1	opp	-30.5	159	172.695	189.874	13.7795	0.157588	0.404554	-0.993854	0.965679	178.832	196.623	13.3728
CREB/ATF/1	same	-30.5	176	168.251	185.43	13.6173	0.259919	0.44706	0.569043	0.932609	180.409	198.829	13.4316
CREB/ATF/1	same	-29.5	183	167.682	184.985	13.6009	0.112041	0.354472	1.12625	0.932609	179.799	198.352	13.4089
CREB/ATF/1	opp	-29.5	167	166.509	183.8	13.5573	0.464303	0.491641	0.0361819	0.965679	172.427	190.332	13.1312
CREB/ATF/1	opp	-28.5	140	162.484	179.118	13.3835	0.0398419	0.303773	-1.67999	0.965679	168.259	185.484	12.9715
CREB/ATF/1	same	-28.5	186	169.867	187.631	13.6979	0.102268	0.354472	1.17774	0.932609	182.142	201.19	13.496
CREB/ATF/1	opp	-27.5	183	161.173	177.57	13.3256	0.0415383	0.303773	1.63799	0.965679	166.901	183.881	12.919
CREB/ATF/1	same	-27.5	160	170.506	187.82	13.7048	0.223302	0.432059	-0.766615	0.932609	182.827	201.392	13.5214
CREB/ATF/1	same	-26.5	174	165.476	182.718	13.5173	0.239425	0.440231	0.630629	0.932609	177.433	195.922	13.3204
CREB/ATF/1	opp	-26.5	159	154.733	170.198	13.046	0.346562	0.462363	0.327071	0.965679	160.232	176.247	12.6583
CREB/ATF/1	same	-25.5	174	168.676	186.018	13.6389	0.323229	0.462363	0.390387	0.932609	180.864	199.46	13.4486
CREB/ATF/1	opp	-25.5	161	161.616	177.528	13.324	0.501593	0.510497	-0.0462343	0.965679	167.36	183.837	12.9368
CREB/ATF/1	same	-24.5	206	166.865	184.192	13.5717	0.0014893	0.0512318	2.88359	0.932609	178.923	197.502	13.3762
CREB/ATF/1	opp	-24.5	157	162.534	179.247	13.3883	0.350582	0.462363	-0.413326	0.965679	168.31	185.617	12.9734
CREB/ATF/1	same	-23.5	151	164.765	181.446	13.4702	0.150428	0.403651	-1.02189	0.932609	176.671	194.557	13.2918
CREB/ATF/1	opp	-23.5	163	165.957	183.071	13.5304	0.42929	0.479595	-0.218511	0.965679	171.855	189.577	13.1093
CREB/ATF/1	same	-22.5	145	154.928	170.864	13.0715	0.226078	0.432059	-0.759548	0.932609	166.124	183.21	12.8889
CREB/ATF/1	opp	-22.5	170	173.648	191.721	13.8463	0.410252	0.470752	-0.263439	0.965679	179.819	198.535	13.4097
CREB/ATF/1	opp	-21.5	186	170.66	187.796	13.7039	0.113704	0.354472	1.11942	0.965679	176.725	194.47	13.2938
CREB/ATF/1	same	-21.5	168	160.804	176.824	13.2975	0.269203	0.45395	0.541175	0.932609	172.424	189.602	13.131
CREB/ATF/1	opp	-20.5	140	174.064	191.842	13.8507	0.0043962	0.087716	-2.45934	0.965679	180.25	198.661	13.4257
CREB/ATF/1	same	-20.5	176	165.593	182.582	13.5123	0.197293	0.432059	0.77017	0.932609	177.559	195.775	13.3251
CREB/ATF/1	opp	-19.5	196	180.152	198.489	14.0886	0.112669	0.354472	1.12486	0.965679	186.555	205.543	13.6585
CREB/ATF/1	same	-19.5	167	157.729	173.702	13.1796	0.216709	0.432059	0.70347	0.932609	169.126	186.254	13.0049
CREB/ATF/1	same	-18.5	128	144.394	158.609	12.594	0.0911034	0.354472	-1.30173	0.932609	154.828	170.07	12.443
CREB/ATF/1	opp	-18.5	193	182.456	201.744	14.2036	0.205596	0.432059	0.742351	0.965679	188.94	208.914	13.7456
CREB/ATF/1	same	-17.5	121	150.014	165.109	12.8495	0.0083272	0.121484	-2.25799	0.932609	160.854	177.04	12.6828
CREB/ATF/1	opp	-17.5	171	166.605	183.167	13.5339	0.348166	0.462363	0.324757	0.965679	172.526	189.677	13.1349
CREB/ATF/1	same	-16.5	129	144.208	158.452	12.5878	0.108903	0.354472	-1.20814	0.932609	154.628	169.902	12.435
CREB/ATF/1	opp	-16.5	160	168.852	186.236	13.6468	0.262646	0.447278	-0.648647	0.965679	174.853	192.855	13.2232
CREB/ATF/1	opp	-15.5	177	167.383	183.519	13.5469	0.215622	0.432059	0.709908	0.965679	173.332	190.041	13.1656
CREB/ATF/1	same	-15.5	153	144.523	159.026	12.6105	0.225751	0.432059	0.672205	0.932609	154.967	170.517	12.4486
CREB/ATF/1	opp	-14.5	150	168.547	184.87	13.5967	0.0803147	0.33693	-1.36405	0.965679	174.537	191.441	13.2112
CREB/ATF/1	same	-14.5	150	139.577	153.731	12.3988	0.177	0.422832	0.840683	0.932609	149.662	164.84	12.2337
CREB/ATF/1	same	-13.5	149	137.702	151.141	12.2939	0.157313	0.404554	0.919003	0.932609	147.652	162.063	12.1512
CREB/ATF/1	opp	-13.5	159	158.985	174.809	13.2215	0.478458	0.492783	0.00111748	0.965679	164.636	181.022	12.831
CREB/ATF/1	same	-12.5	166	153.207	168.034	12.9628	0.1418	0.400703	0.986925	0.932609	164.278	180.176	12.8171
CREB/ATF/1	opp	-12.5	147	145.857	159.868	12.6439	0.440558	0.479595	0.0903813	0.965679	151.041	165.55	12.2899
CREB/ATF/1	same	-11.5	154	150.674	165.366	12.8595	0.373007	0.469449	0.258624	0.932609	161.562	177.316	12.7107
CREB/ATF/1	opp	-11.5	152	149.203	164.034	12.8076	0.388762	0.469478	0.218396	0.965679	154.506	169.864	12.43
CREB/ATF/1	same	-10.5	164	145.785	160.186	12.6565	0.0627529	0.317835	1.43922	0.932609	156.319	171.762	12.5028
CREB/ATF/1	opp	-10.5	170	158.752	174.621	13.2144	0.175074	0.422832	0.851172	0.965679	164.394	180.827	12.8216
CREB/ATF/1	same	-9.5	143	150.098	164.725	12.8345	0.298449	0.462363	-0.553054	0.932609	160.944	176.628	12.6864
CREB/ATF/1	opp	-9.5	157	159.881	175.34	13.2416	0.430337	0.479595	-0.217539	0.965679	165.563	181.572	12.8671
CREB/ATF/1	opp	-8.5	205	167.196	184.292	13.5754	0.00204412	0.058598	2.78476	0.965679	173.138	190.842	13.1582
CREB/ATF/1	same	-8.5	154	152.558	167.809	12.9541	0.43237	0.479595	0.111287	0.932609	163.582	179.935	12.7899
CREB/ATF/1	opp	-7.5	202	161.869	178.235	13.3505	0.00101815	0.0462851	3.00598	0.965679	167.622	184.569	12.9469
CREB/ATF/1	same	-7.5	138	151.094	165.925	12.8812	0.152543	0.403651	-1.01656	0.932609	162.013	177.915	12.7284
CREB/ATF/1	opp	-6.5	228	180.434	199.17	14.1128	0.000283691	0.0243974	3.3704	0.965679	186.847	206.248	13.6692
CREB/ATF/1	same	-6.5	158	145.803	160.567	12.6715	0.146769	0.400703	0.962539	0.932609	156.339	172.169	12.5036
CREB/ATF/1	opp	-5.5	211	202.093	226.28	15.0426	0.251955	0.442206	0.592141	0.965679	209.275	234.322	14.4663
CREB/ATF/1	same	-5.5	141	135.04	147.911	12.1619	0.285777	0.45938	0.49002	0.932609	144.799	158.599	12.0332
CREB/ATF/1	opp	-4.5	214	181.446	196.894	14.0319	0.00827566	0.121484	2.31999	0.965679	187.895	203.892	13.7075
CREB/ATF/1	same	-4.5	96	109.443	121.652	11.0296	0.106269	0.354472	-1.21884	0.932609	117.352	130.442	10.8329
CREB/ATF/1	opp	-3.5	423	343.679	370.502	19.2484	1.57721e-05	0.00271279	4.12093	0.965679	355.893	383.67	18.8651
CREB/ATF/1	same	-3.5	40	42.6772	46.0847	6.78857	0.378144	0.469449	-0.394369	0.932609	45.7611	49.4148	6.7647
CREB/ATF/1	opp	-2.5	1	3.40129	3.69215	1.9215	0.146696	0.400703	-1.2497	0.965679	3.52217	3.82337	1.87674
CREB/ATF/1	same	-2.5	58	58.1872	61.2273	7.82479	0.525052	0.528123	-0.0239293	0.932609	62.3919	65.6516	7.89886
CREB/ATF/1	same	-1.5	56	72.3646	78.0805	8.83632	0.027444	0.25475	-1.85197	0.932609	77.5937	83.7226	8.80873
CREB/ATF/1	opp	-1.5	0	2.59985	2.78645	1.66926	0.0742846	0.321187	-1.55748	0.965679	2.69225	2.88548	1.64081
CREB/ATF/1	opp	-0.5	534	494.712	553.473	23.526	0.0381114	0.303773	1.66997	0.965679	512.295	573.144	22.6339
CREB/ATF/1	same	-0.5	0	0	0	0	1	1	0	0.932609	0	0	0
CREB/ATF/1	opp	0.5	35	38.2957	41.9824	6.47938	0.333572	0.462363	-0.508638	0.962216	39.728	43.5526	6.30301
CREB/ATF/1	same	0.5	2	3.12498	3.18267	1.784	0.395781	0.469478	-0.630591	0.965101	3.29342	3.35423	1.81478
CREB/ATF/1	opp	1.5	65	46.7622	50.4584	7.10341	0.00458979	0.087716	2.56748	0.962216	48.5984	52.4398	6.97126
CREB/ATF/1	same	1.5	33	24.7607	26.8668	5.18332	0.0447893	0.303773	1.58958	0.965101	25.6561	27.8383	5.06518
CREB/ATF/1	opp	2.5	7	10.2692	11.0228	3.32007	0.196943	0.432059	-0.984682	0.962216	10.6725	11.4557	3.26687
CREB/ATF/1	same	2.5	19	20.864	23.0349	4.79947	0.395568	0.469478	-0.388369	0.965101	21.6184	23.8679	4.64956
CREB/ATF/1	same	3.5	386	347.17	383.969	19.5951	0.0186929	0.214346	1.98161	0.965101	359.724	397.854	18.9664
CREB/ATF/1	opp	3.5	1	0.398449	0.404291	0.635839	0.0611366	0.317835	0.946075	0.962216	0.414095	0.420166	0.643502
CREB/ATF/1	same	4.5	30	25.5034	27.7675	5.26949	0.160691	0.406453	0.853336	0.965101	26.4256	28.7717	5.14058
CREB/ATF/1	opp	4.5	171	181.85	202.429	14.2278	0.222888	0.432059	-0.762591	0.962216	188.991	210.378	13.7474
CREB/ATF/1	opp	5.5	104	112.587	120.622	10.9828	0.224931	0.432059	-0.78186	0.962216	117.008	125.358	10.817
CREB/ATF/1	same	5.5	36	37.0191	40.1612	6.33728	0.476885	0.492783	-0.160811	0.965101	38.3578	41.6134	6.19336
CREB/ATF/1	same	6.5	282	234.174	253.333	15.9164	0.0010764	0.0462851	3.0048	0.965101	242.642	262.494	15.577
CREB/ATF/1	opp	6.5	105	102.102	112.134	10.5893	0.362839	0.465733	0.273686	0.962216	106.111	116.537	10.301
CREB/ATF/1	same	7.5	171	149.198	162.762	12.7578	0.0362231	0.303773	1.70891	0.965101	154.593	168.647	12.4336
CREB/ATF/1	opp	7.5	151	154.212	171.34	13.0897	0.418564	0.47559	-0.245391	0.962216	160.268	178.068	12.6597
CREB/ATF/1	same	8.5	167	172.382	191.107	13.8241	0.359102	0.464403	-0.389329	0.965101	178.616	198.018	13.3647
CREB/ATF/1	opp	8.5	160	160.129	176.076	13.2694	0.516954	0.523036	-0.00969445	0.962216	166.417	182.991	12.9003
CREB/ATF/1	opp	9.5	191	170.509	188.293	13.722	0.0560689	0.317835	1.4933	0.962216	177.205	195.687	13.3118
CREB/ATF/1	same	9.5	172	157.215	173.503	13.1721	0.11254	0.354472	1.12244	0.965101	162.9	179.777	12.7632
CREB/ATF/1	same	10.5	150	144.258	158.412	12.5862	0.298108	0.462363	0.456252	0.965101	149.474	164.141	12.226
CREB/ATF/1	opp	10.5	161	167.428	184.178	13.5712	0.327119	0.462363	-0.473621	0.962216	174.002	191.411	13.191
CREB/ATF/1	same	11.5	171	150.52	165.614	12.8691	0.0459192	0.303773	1.59143	0.965101	155.963	171.602	12.4885
CREB/ATF/1	opp	11.5	180	163.987	180.606	13.439	0.100007	0.354472	1.19151	0.962216	170.427	187.698	13.0548
CREB/ATF/1	opp	12.5	145	164.907	181.403	13.4686	0.063112	0.317835	-1.47799	0.962216	171.382	188.527	13.0913
CREB/ATF/1	same	12.5	130	146.583	160.924	12.6856	0.0901532	0.354472	-1.30723	0.965101	151.884	166.743	12.3241
CREB/ATF/1	same	13.5	141	148.518	163.384	12.7822	0.285454	0.45938	-0.588177	0.965101	153.889	169.293	12.4052
CREB/ATF/1	opp	13.5	166	160.784	177.513	13.3234	0.322318	0.462363	0.391489	0.962216	167.098	184.483	12.9266
CREB/ATF/1	same	14.5	130	146.395	160.565	12.6714	0.092661	0.354472	-1.29383	0.965101	151.688	166.371	12.3162
CREB/ATF/1	opp	14.5	160	163.23	179.32	13.3911	0.420288	0.47559	-0.241175	0.962216	169.639	186.362	13.0246
CREB/ATF/1	same	15.5	173	149.715	164.755	12.8357	0.028141	0.25475	1.81409	0.965101	155.129	170.713	12.4551
CREB/ATF/1	opp	15.5	152	159.793	175.705	13.2554	0.284992	0.45938	-0.587877	0.962216	166.067	182.604	12.8867
CREB/ATF/1	same	16.5	171	159.687	175.844	13.2606	0.174473	0.422832	0.853095	0.965101	165.462	182.203	12.8632
CREB/ATF/1	opp	16.5	151	146.564	160.733	12.678	0.337533	0.462363	0.349936	0.962216	152.319	167.044	12.3417
CREB/ATF/1	same	17.5	143	168.223	184.909	13.5981	0.0260231	0.25475	-1.85487	0.965101	174.306	191.596	13.2025
CREB/ATF/1	opp	17.5	168	154.397	170.307	13.0502	0.128905	0.375792	1.04238	0.962216	160.46	176.995	12.6673
CREB/ATF/1	same	18.5	152	159.213	175.158	13.2347	0.300645	0.462363	-0.545039	0.965101	164.971	181.492	12.8441
CREB/ATF/1	opp	18.5	162	159.553	176.017	13.2671	0.40294	0.470752	0.184427	0.962216	165.819	182.929	12.8771
CREB/ATF/1	opp	19.5	130	159.888	175.598	13.2513	0.00847559	0.121484	-2.25545	0.962216	166.166	182.493	12.8905
CREB/ATF/1	same	19.5	166	159.115	174.741	13.219	0.276207	0.456805	0.520852	0.965101	164.869	181.06	12.8401
CREB/ATF/1	same	20.5	150	161.131	177.283	13.3148	0.20223	0.432059	-0.835989	0.965101	166.958	183.693	12.9212
CREB/ATF/1	opp	20.5	168	162.158	178.804	13.3718	0.305782	0.462363	0.436882	0.962216	168.526	185.825	12.9817
CREB/ATF/1	same	21.5	162	175.375	193.476	13.9096	0.16559	0.412775	-0.961568	0.965101	181.717	200.473	13.4802
CREB/ATF/1	opp	21.5	154	155.595	170.9	13.0729	0.470314	0.491641	-0.12199	0.962216	161.705	177.611	12.7163
CREB/ATF/1	same	22.5	209	172.478	190.256	13.7933	0.00308621	0.0758325	2.64779	0.965101	178.715	197.135	13.3684
CREB/ATF/1	opp	22.5	172	168.504	185.435	13.6174	0.374711	0.469449	0.256703	0.962216	175.121	192.716	13.2333
CREB/ATF/1	same	23.5	145	166.574	183.71	13.5539	0.0488602	0.311258	-1.59171	0.965101	172.597	190.353	13.1376
CREB/ATF/1	opp	23.5	173	175.705	194.271	13.9381	0.43877	0.479595	-0.194071	0.962216	182.605	201.9	13.5131
CREB/ATF/1	opp	24.5	155	172.089	189.647	13.7712	0.101545	0.354472	-1.24089	0.962216	178.846	197.094	13.3733
CREB/ATF/1	same	24.5	173	163.449	179.575	13.4006	0.21441	0.432059	0.712714	0.965101	169.36	186.069	13.0138
CREB/ATF/1	opp	25.5	153	169.598	186.848	13.6692	0.106852	0.354472	-1.21423	0.962216	176.257	194.185	13.2762
CREB/ATF/1	same	25.5	169	159.848	175.787	13.2585	0.220952	0.432059	0.690271	0.965101	165.628	182.144	12.8697
CREB/ATF/1	same	26.5	133	157.113	173.116	13.1574	0.02739	0.25475	-1.83268	0.965101	162.795	179.376	12.7591
CREB/ATF/1	opp	26.5	153	173.239	190.409	13.7989	0.0646756	0.317835	-1.46669	0.962216	180.041	197.886	13.418
CREB/ATF/1	opp	27.5	187	168.606	185.788	13.6304	0.0746946	0.321187	1.34946	0.962216	175.227	193.084	13.2373
CREB/ATF/1	same	27.5	153	157.414	173.703	13.1796	0.38211	0.469449	-0.334938	0.965101	163.107	179.984	12.7713
CREB/ATF/1	opp	28.5	179	173.179	190.936	13.818	0.312061	0.462363	0.421234	0.962216	179.98	198.433	13.4157
CREB/ATF/1	same	28.5	157	158.562	174.286	13.2018	0.471632	0.491641	-0.118314	0.965101	164.296	180.589	12.8178
CREB/ATF/1	same	29.5	133	151.452	166.254	12.894	0.0700716	0.321187	-1.43108	0.965101	156.929	172.266	12.5271
CREB/ATF/1	opp	29.5	173	175.108	193.739	13.919	0.456579	0.489504	-0.151425	0.962216	181.984	201.347	13.4901
CREB/ATF/1	opp	30.5	152	180.123	198.654	14.0945	0.0177892	0.214346	-1.99532	0.962216	187.196	206.455	13.682
CREB/ATF/1	same	30.5	156	155.357	170.925	13.0738	0.458199	0.489504	0.0491986	0.965101	160.975	177.105	12.6876
CREB/ATF/1	same	31.5	135	149.87	164.849	12.8394	0.119096	0.359378	-1.15816	0.965101	155.29	170.81	12.4615
CREB/ATF/1	opp	31.5	184	178.763	197.595	14.0568	0.330237	0.462363	0.372585	0.962216	185.782	205.354	13.6302
CREB/ATF/1	same	32.5	155	150.429	165.643	12.8702	0.335528	0.462363	0.355172	0.965101	155.869	171.633	12.4847
CREB/ATF/1	opp	32.5	187	182.026	200.663	14.1655	0.338691	0.462363	0.351148	0.962216	189.174	208.542	13.754
CREB/ATF/1	opp	33.5	168	184.708	203.822	14.2766	0.115409	0.354472	-1.17032	0.962216	191.961	211.826	13.855
CREB/ATF/1	same	33.5	139	152.536	167.76	12.9522	0.145166	0.400703	-1.04507	0.965101	158.052	173.827	12.5719
CREB/ATF/1	same	34.5	177	158.455	174.657	13.2158	0.0671903	0.321021	1.40322	0.965101	164.185	180.972	12.8135
CREB/ATF/1	opp	34.5	167	179.064	197.317	14.047	0.194572	0.432059	-0.858863	0.962216	186.096	205.066	13.6417
CREB/ATF/1	same	35.5	179	160.875	177.155	13.3099	0.0729386	0.321187	1.36173	0.965101	166.693	183.561	12.911
CREB/ATF/1	opp	35.5	161	172.019	189.273	13.7577	0.21257	0.432059	-0.80091	0.962216	178.773	196.706	13.3706
CREB/ATF/1	same	36.5	149	158.138	174.345	13.204	0.24827	0.440231	-0.692094	0.965101	163.857	180.649	12.8007
CREB/ATF/1	opp	36.5	183	178.192	196.604	14.0216	0.341597	0.462363	0.342891	0.962216	185.189	204.325	13.6084
CREB/ATF/1	same	37.5	138	157.561	173.485	13.1714	0.0621173	0.317835	-1.48513	0.965101	163.259	179.758	12.7773
CREB/ATF/1	opp	37.5	192	172.138	189.655	13.7715	0.0623557	0.317835	1.44228	0.962216	178.897	197.103	13.3752
CREB/ATF/1	opp	38.5	184	175.496	193.953	13.9267	0.246199	0.440231	0.610656	0.962216	182.387	201.569	13.5051
CREB/ATF/1	same	38.5	152	155.648	171.238	13.0858	0.405256	0.470752	-0.278772	0.965101	161.276	177.43	12.6995
CREB/ATF/1	same	39.5	154	160.676	176.583	13.2884	0.316628	0.462363	-0.502385	0.965101	166.486	182.968	12.903
CREB/ATF/1	opp	39.5	181	178.636	197.817	14.0647	0.41054	0.470752	0.168077	0.962216	185.651	205.585	13.6254
CREB/ATF/1	same	40.5	156	166.761	184.02	13.5654	0.214782	0.432059	-0.793302	0.965101	172.792	190.675	13.145
CREB/ATF/1	opp	40.5	169	170.687	188.379	13.7251	0.468846	0.491641	-0.122904	0.962216	177.389	195.776	13.3188
CREB/ATF/1	opp	41.5	185	170.281	187.672	13.6993	0.122594	0.363555	1.07443	0.962216	176.968	195.041	13.3029
CREB/ATF/1	same	41.5	174	166.846	183.814	13.5578	0.273953	0.456805	0.527643	0.965101	172.88	190.461	13.1484
CREB/ATF/1	opp	42.5	174	179.743	198.504	14.0892	0.351797	0.462363	-0.407599	0.962216	186.801	206.299	13.6675
CREB/ATF/1	same	42.5	161	159.717	175.367	13.2426	0.438797	0.479595	0.0969068	0.965101	165.492	181.708	12.8644
CREB/ATF/1	same	43.5	164	173.684	192.433	13.872	0.244973	0.440231	-0.698108	0.965101	179.965	199.392	13.4151
CREB/ATF/1	opp	43.5	179	173.549	190.728	13.8104	0.322134	0.462363	0.394671	0.962216	180.364	198.218	13.43
CREB/ATF/2	opp	-42.5	121	99.4968	110.103	10.493	0.0158798	0.164403	2.04929	0.976107	101.932	112.799	10.0962
CREB/ATF/2	same	-42.5	103	87.4058	96.162	9.80622	0.0455464	0.267205	1.59023	0.944754	92.517	101.785	9.61858
CREB/ATF/2	opp	-41.5	93	98.1671	108.266	10.4051	0.323522	0.49395	-0.496588	0.976107	100.57	110.916	10.0285
CREB/ATF/2	same	-41.5	81	85.3551	94.045	9.69768	0.343742	0.49395	-0.449087	0.944754	90.3464	99.5444	9.50507
CREB/ATF/2	opp	-40.5	95	92.7552	102.018	10.1004	0.381764	0.49395	0.222247	0.976107	95.0257	104.516	9.74811
CREB/ATF/2	same	-40.5	84	84.3416	92.7015	9.62816	0.514121	0.523037	-0.0354844	0.944754	89.2737	98.1223	9.44848
CREB/ATF/2	same	-39.5	119	91.1596	100.728	10.0364	0.00219834	0.0626667	2.77395	0.944754	96.4904	106.619	9.82295
CREB/ATF/2	opp	-39.5	103	92.6587	102.436	10.121	0.130865	0.429383	1.02176	0.976107	94.9268	104.943	9.74304
CREB/ATF/2	opp	-38.5	77	91.5002	100.986	10.0492	0.0686926	0.309997	-1.44292	0.976107	93.7399	103.458	9.68194
CREB/ATF/2	same	-38.5	87	86.5251	95.5179	9.77333	0.451246	0.502653	0.0485873	0.944754	91.5849	101.103	9.57
CREB/ATF/2	same	-37.5	71	88.4431	97.8136	9.89008	0.0324532	0.238174	-1.76369	0.944754	93.6149	103.533	9.67548
CREB/ATF/2	opp	-37.5	104	94.7969	104.153	10.2055	0.159353	0.450011	0.90177	0.976107	97.1174	106.703	9.85482
CREB/ATF/2	same	-36.5	80	90.0808	99.4618	9.97305	0.156182	0.450011	-1.0108	0.944754	95.3484	105.278	9.76465
CREB/ATF/2	opp	-36.5	98	91.7075	101.405	10.07	0.236373	0.469632	0.62488	0.976107	93.9523	103.887	9.6929
CREB/ATF/2	opp	-35.5	108	87.1373	95.9635	9.79609	0.0131875	0.145062	2.12969	0.976107	89.2703	98.3125	9.4483
CREB/ATF/2	same	-35.5	96	88.8136	97.6644	9.88253	0.205622	0.469632	0.727178	0.944754	94.0072	103.375	9.69573
CREB/ATF/2	opp	-34.5	91	90.8583	100.325	10.0163	0.466238	0.505676	0.0141491	0.976107	93.0823	102.781	9.64792
CREB/ATF/2	same	-34.5	92	92.1185	101.368	10.0682	0.522768	0.526898	-0.011765	0.944754	97.5052	107.295	9.87447
CREB/ATF/2	opp	-33.5	97	92.6345	102.19	10.1089	0.302096	0.49395	0.431846	0.976107	94.902	104.692	9.74177
CREB/ATF/2	same	-33.5	88	92.4698	101.394	10.0694	0.345186	0.49395	-0.443894	0.944754	97.8771	107.323	9.89329
CREB/ATF/2	opp	-32.5	126	93.3163	102.766	10.1373	0.000531599	0.0311871	3.22408	0.976107	95.6006	105.281	9.77755
CREB/ATF/2	same	-32.5	95	92.6939	102.259	10.1123	0.379327	0.49395	0.228045	0.944754	98.1144	108.239	9.90527
CREB/ATF/2	same	-31.5	93	88.7486	97.6055	9.87955	0.302398	0.49395	0.430322	0.944754	93.9383	103.313	9.69218
CREB/ATF/2	opp	-31.5	96	91.9017	101.499	10.0747	0.311004	0.49395	0.406791	0.976107	94.1513	103.984	9.70316
CREB/ATF/2	opp	-30.5	100	88.3138	97.5392	9.87619	0.0992419	0.375004	1.18327	0.976107	90.4756	99.9267	9.51187
CREB/ATF/2	same	-30.5	90	91.1405	100.639	10.0319	0.480193	0.512206	-0.113689	0.944754	96.4701	106.524	9.82192
CREB/ATF/2	same	-29.5	95	91.8177	101.874	10.0933	0.344924	0.49395	0.31529	0.944754	97.1869	107.831	9.85834
CREB/ATF/2	opp	-29.5	88	88.7526	97.8175	9.89028	0.496368	0.516928	-0.0760963	0.976107	90.9251	100.212	9.53547
CREB/ATF/2	same	-28.5	63	95.069	104.871	10.2407	0.000302583	0.0311871	-3.13154	0.944754	100.628	111.003	10.0314
CREB/ATF/2	opp	-28.5	106	91.3709	100.996	10.0497	0.0595181	0.283113	1.45568	0.976107	93.6075	103.468	9.6751
CREB/ATF/2	opp	-27.5	82	85.7368	94.538	9.72306	0.369318	0.49395	-0.384322	0.976107	87.8355	96.8521	9.37206
CREB/ATF/2	same	-27.5	91	93.0937	102.379	10.1182	0.44105	0.500276	-0.206926	0.944754	98.5376	108.366	9.92661
CREB/ATF/2	opp	-26.5	96	86.0887	94.6096	9.72675	0.131742	0.429383	1.01897	0.976107	88.196	96.9255	9.39127
CREB/ATF/2	same	-26.5	92	94.8917	105.054	10.2496	0.409293	0.500247	-0.282132	0.944754	100.441	111.197	10.022
CREB/ATF/2	same	-25.5	114	94.0676	104.369	10.2161	0.0200257	0.185501	1.95107	0.944754	99.5684	110.472	9.9784
CREB/ATF/2	opp	-25.5	96	90.2123	99.48	9.97397	0.250826	0.469632	0.580276	0.976107	92.4206	101.915	9.61356
CREB/ATF/2	opp	-24.5	69	86.3536	94.9654	9.74502	0.0314835	0.238174	-1.78077	0.976107	88.4674	97.29	9.40571
CREB/ATF/2	same	-24.5	87	90.9717	100.714	10.0357	0.363646	0.49395	-0.395759	0.944754	96.2914	106.604	9.81282
CREB/ATF/2	same	-23.5	92	87.1572	96.0724	9.80165	0.279514	0.491945	0.49408	0.944754	92.2539	101.69	9.60489
CREB/ATF/2	opp	-23.5	92	93.397	103.163	10.1569	0.469841	0.505676	-0.137541	0.976107	95.6832	105.689	9.78178
CREB/ATF/2	same	-22.5	70	88.1121	96.951	9.84637	0.0270397	0.226618	-1.83947	0.944754	93.2647	102.62	9.65736
CREB/ATF/2	opp	-22.5	105	88.93	98.2411	9.91166	0.0423922	0.257277	1.62133	0.976107	91.1068	100.646	9.54499
CREB/ATF/2	opp	-21.5	66	91.8472	101.81	10.0901	0.00284849	0.0626667	-2.56165	0.976107	94.0955	104.302	9.70028
CREB/ATF/2	same	-21.5	92	92.648	101.705	10.0849	0.500781	0.518455	-0.0642592	0.944754	98.0658	107.653	9.90282
CREB/ATF/2	opp	-20.5	126	92.5778	102.048	10.1019	0.000398053	0.0311871	3.30851	0.976107	94.8439	104.546	9.73879
CREB/ATF/2	same	-20.5	108	92.495	102.362	10.1174	0.0508976	0.279937	1.53251	0.944754	97.9039	108.347	9.89464
CREB/ATF/2	same	-19.5	83	87.013	95.9864	9.79727	0.358987	0.49395	-0.409604	0.944754	92.1012	101.599	9.59694
CREB/ATF/2	opp	-19.5	95	97.0387	107.226	10.355	0.444478	0.500276	-0.196876	0.976107	99.414	109.851	9.97066
CREB/ATF/2	same	-18.5	72	86.9848	96.0406	9.80003	0.0569345	0.283113	-1.52906	0.944754	92.0714	101.657	9.59539
CREB/ATF/2	opp	-18.5	81	94.1791	103.716	10.1841	0.0934186	0.375004	-1.29409	0.976107	96.4845	106.255	9.82265
CREB/ATF/2	opp	-17.5	93	93.8501	103.264	10.1619	0.49245	0.516928	-0.0836575	0.976107	96.1474	105.792	9.80548
CREB/ATF/2	same	-17.5	77	77.53	85.1614	9.22829	0.506205	0.521007	-0.057428	0.944754	82.0637	90.1414	9.0589
CREB/ATF/2	opp	-16.5	101	93.4881	102.638	10.131	0.20208	0.469632	0.741479	0.976107	95.7765	105.15	9.78655
CREB/ATF/2	same	-16.5	89	83.013	91.974	9.59031	0.235428	0.469632	0.624276	0.944754	87.8673	97.3524	9.37376
CREB/ATF/2	same	-15.5	91	82.9502	91.6488	9.57334	0.173277	0.455176	0.840855	0.944754	87.8009	97.0081	9.37021
CREB/ATF/2	opp	-15.5	94	97.4796	107.155	10.3516	0.387302	0.49395	-0.336146	0.976107	99.8658	109.778	9.99329
CREB/ATF/2	same	-14.5	93	77.4973	85.1776	9.22917	0.0376648	0.250031	1.67975	0.944754	82.0291	90.1585	9.05699
CREB/ATF/2	opp	-14.5	79	86.2975	94.7276	9.73281	0.2347	0.469632	-0.749786	0.976107	88.4099	97.0463	9.40266
CREB/ATF/2	same	-13.5	71	85.0363	93.4482	9.66686	0.0679717	0.309997	-1.45201	0.944754	90.009	98.9128	9.48731
CREB/ATF/2	opp	-13.5	89	85.9422	94.7735	9.73517	0.344928	0.49395	0.314095	0.976107	88.046	97.0934	9.38328
CREB/ATF/2	same	-12.5	89	83.4549	92.0798	9.59582	0.250785	0.469632	0.577865	0.944754	88.3351	97.4643	9.39867
CREB/ATF/2	opp	-12.5	89	87.757	96.8209	9.83976	0.419488	0.500276	0.126321	0.976107	89.9052	99.1909	9.48183
CREB/ATF/2	opp	-11.5	113	95.1218	105.025	10.2482	0.0325413	0.238174	1.74453	0.976107	97.4503	107.596	9.87169
CREB/ATF/2	same	-11.5	89	82.3005	90.8025	9.52904	0.211689	0.469632	0.703067	0.944754	87.1131	96.1124	9.33344
CREB/ATF/2	opp	-10.5	86	93.7402	103.443	10.1707	0.229564	0.469632	-0.761027	0.976107	96.0348	105.975	9.79973
CREB/ATF/2	same	-10.5	77	82.8359	90.9796	9.53832	0.282919	0.493007	-0.611833	0.944754	87.6798	96.2998	9.36375
CREB/ATF/2	same	-9.5	102	84.1425	92.7004	9.62811	0.0254694	0.224131	1.85472	0.944754	89.0629	98.1213	9.43732
CREB/ATF/2	opp	-9.5	107	94.5428	104.537	10.2244	0.0933238	0.375004	1.21839	0.976107	96.857	107.096	9.8416
CREB/ATF/2	opp	-8.5	108	99.399	110.032	10.4896	0.179856	0.458763	0.819955	0.976107	101.832	112.725	10.0912
CREB/ATF/2	same	-8.5	74	79.6293	87.5994	9.35945	0.286977	0.49395	-0.601459	0.944754	84.2858	92.7219	9.18073
CREB/ATF/2	opp	-7.5	137	126.914	141.474	11.8943	0.17319	0.455176	0.847952	0.976107	130.021	144.937	11.4027
CREB/ATF/2	same	-7.5	77	73.3066	80.7799	8.98776	0.306945	0.49395	0.410939	0.944754	77.5933	85.5036	8.80871
CREB/ATF/2	opp	-6.5	129	122.732	136.711	11.6923	0.26752	0.480445	0.53606	0.976107	125.736	140.057	11.2132
CREB/ATF/2	same	-6.5	71	68.023	74.5382	8.63355	0.330643	0.49395	0.344822	0.944754	72.0007	78.897	8.48532
CREB/ATF/2	opp	-5.5	138	109.401	119.194	10.9176	0.00361549	0.065079	2.61955	0.976107	112.079	122.112	10.5867
CREB/ATF/2	same	-5.5	57	52.9961	58.9173	7.67576	0.263417	0.480162	0.521633	0.944754	56.0951	62.3626	7.48967
CREB/ATF/2	opp	-4.5	238	200.717	218.404	14.7785	0.00465282	0.0744451	2.52281	0.976107	205.63	223.75	14.3398
CREB/ATF/2	same	-4.5	23	21.205	22.9847	4.79424	0.299612	0.49395	0.374403	0.944754	22.445	24.3288	4.73762
CREB/ATF/2	opp	-3.5	2	3.93455	4.30967	2.07597	0.247852	0.469632	-0.931874	0.976107	4.03086	4.41516	2.0077
CREB/ATF/2	same	-3.5	39	36.8566	38.5151	6.20605	0.323625	0.49395	0.34538	0.944754	39.0118	40.7673	6.24594
CREB/ATF/2	opp	-2.5	6	4.28253	4.58024	2.14015	0.142136	0.444885	0.8025	0.976107	4.38736	4.69236	2.0946
CREB/ATF/2	same	-2.5	34	35.9263	40.7515	6.38369	0.416262	0.500276	-0.301748	0.944754	38.0271	43.1345	6.16661
CREB/ATF/2	opp	-1.5	402	440.452	503.536	22.4396	0.0338315	0.238174	-1.71357	0.976107	451.233	515.861	21.2423
CREB/ATF/2	same	-1.5	0	0	0	0	1	1	0	0.944754	0	0	0
CREB/ATF/2	same	-0.5	0	1.77657	1.87433	1.36906	0.169217	0.455176	-1.29766	0.944754	1.88046	1.98394	1.3713
CREB/ATF/2	opp	-0.5	44	46.7389	50.3449	7.09541	0.379986	0.49395	-0.386013	0.976107	47.883	51.5772	6.91976
CREB/ATF/2	same	0.5	20	11.406	12.31	3.50856	0.00688461	0.0865493	2.44943	0.986154	11.8142	12.7505	3.43717
CREB/ATF/2	opp	0.5	67	58.1929	62.6354	7.91425	0.112972	0.389864	1.11282	0.931826	61.001	65.6579	7.81031
CREB/ATF/2	opp	1.5	20	17.2713	18.9856	4.35725	0.213724	0.469632	0.626238	0.931826	18.5349	20.3747	4.30522
CREB/ATF/2	same	1.5	18	17.5636	18.6367	4.31702	0.396982	0.494408	0.101088	0.986154	17.8102	18.8983	4.22021
CREB/ATF/2	opp	2.5	20	9.98812	11.5378	3.39673	0.00156621	0.0626667	2.94751	0.931826	10.7189	12.3819	3.27397
CREB/ATF/2	same	2.5	226	190.976	208.533	14.4407	0.0060671	0.0821392	2.42537	0.986154	193.657	211.461	13.9161
CREB/ATF/2	opp	3.5	97	82.5242	93.7053	9.68015	0.05262	0.28064	1.49541	0.931826	88.5618	100.561	9.41073
CREB/ATF/2	same	3.5	9	11.0601	11.8206	3.4381	0.334019	0.49395	-0.599209	0.986154	11.2154	11.9865	3.34894
CREB/ATF/2	same	4.5	5	10.2173	11.2632	3.35607	0.0592989	0.283113	-1.55458	0.986154	10.3607	11.4214	3.21881
CREB/ATF/2	opp	4.5	40	37.022	38.763	6.22599	0.277576	0.491945	0.478325	0.931826	39.7306	41.5989	6.30322
CREB/ATF/2	same	5.5	197	164.385	178.158	13.3476	0.00594665	0.0821392	2.44354	0.986154	166.693	180.66	12.9109
CREB/ATF/2	opp	5.5	32	21.4666	23.4129	4.83869	0.0123773	0.145062	2.17692	0.931826	23.0371	25.1258	4.7997
CREB/ATF/2	same	6.5	89	81.2162	87.943	9.37779	0.178155	0.458763	0.830028	0.986154	82.3564	89.1777	9.07505
CREB/ATF/2	opp	6.5	69	68.4068	77.427	8.79926	0.439611	0.500276	0.0674121	0.931826	73.4116	83.0918	8.56806
CREB/ATF/2	opp	7.5	95	76.9519	84.0246	9.16649	0.0199228	0.185501	1.96892	0.931826	82.5819	90.172	9.08746
CREB/ATF/2	same	7.5	86	93.2906	103.583	10.1776	0.243728	0.469632	-0.716341	0.986154	94.6004	105.038	9.72628
CREB/ATF/2	opp	8.5	119	91.5477	101.184	10.059	0.00251089	0.0626667	2.72911	0.931826	98.2456	108.587	9.91189
CREB/ATF/2	same	8.5	105	95.3351	105.544	10.2735	0.149137	0.444885	0.940767	0.986154	96.6736	107.026	9.83227
CREB/ATF/2	same	9.5	99	85.8706	94.5938	9.72593	0.0732759	0.322414	1.34993	0.986154	87.0763	95.9219	9.33147
CREB/ATF/2	opp	9.5	101	97.7816	108.046	10.3945	0.348099	0.49395	0.309625	0.931826	104.936	115.951	10.2438
CREB/ATF/2	same	10.5	102	85.916	94.8992	9.74162	0.0397776	0.250031	1.65106	0.986154	87.1222	96.2316	9.33393
CREB/ATF/2	opp	10.5	93	95.3826	105.585	10.2755	0.430045	0.500276	-0.231873	0.931826	102.361	113.31	10.1174
CREB/ATF/2	opp	11.5	94	91.9047	101.562	10.0778	0.387139	0.49395	0.20791	0.931826	98.6287	108.993	9.9312
CREB/ATF/2	same	11.5	84	82.2597	90.6816	9.52269	0.395807	0.494408	0.182748	0.986154	83.4147	91.9548	9.13316
CREB/ATF/2	opp	12.5	99	87.4251	96.251	9.81076	0.100143	0.375004	1.17982	0.931826	93.8213	103.293	9.68614
CREB/ATF/2	same	12.5	82	90.0987	99.2697	9.96342	0.213491	0.469632	-0.812848	0.986154	91.3637	100.663	9.55844
CREB/ATF/2	same	13.5	83	81.4113	89.3452	9.45226	0.401706	0.494408	0.168078	0.986154	82.5543	90.5996	9.08594
CREB/ATF/2	opp	13.5	92	90.6891	99.9483	9.99741	0.418007	0.500276	0.131121	0.931826	97.3241	107.261	9.8653
CREB/ATF/2	same	14.5	74	80.2338	88.3478	9.39935	0.264635	0.480162	-0.66322	0.986154	81.3603	89.5882	9.02
CREB/ATF/2	opp	14.5	92	91.2343	100.56	10.028	0.440527	0.500276	0.0763535	0.931826	97.9092	107.917	9.89491
CREB/ATF/2	opp	15.5	92	87.6591	96.7681	9.83708	0.298036	0.49395	0.441281	0.931826	94.0724	103.848	9.69909
CREB/ATF/2	same	15.5	88	85.7801	94.6849	9.73062	0.378258	0.49395	0.228132	0.986154	86.9845	96.0143	9.32655
CREB/ATF/2	opp	16.5	113	86.5566	95.1345	9.75369	0.00272159	0.0626667	2.71111	0.931826	92.8893	102.095	9.63791
CREB/ATF/2	same	16.5	75	91.0857	100.147	10.0074	0.0479291	0.272114	-1.60739	0.986154	92.3646	101.553	9.61065
CREB/ATF/2	opp	17.5	74	83.5481	92.2433	9.60434	0.161084	0.450011	-0.994148	0.931826	89.6607	98.992	9.46893
CREB/ATF/2	same	17.5	94	87.3018	95.8085	9.78818	0.218349	0.469632	0.684317	0.986154	88.5275	97.1537	9.40891
CREB/ATF/2	opp	18.5	73	84.4029	93.3066	9.65953	0.116004	0.392628	-1.18048	0.931826	90.578	100.133	9.51725
CREB/ATF/2	same	18.5	93	92.1238	101.359	10.0677	0.436293	0.500276	0.0870349	0.986154	93.4172	102.782	9.66526
CREB/ATF/2	opp	19.5	70	82.2989	90.578	9.51725	0.0942839	0.375004	-1.29228	0.931826	88.3201	97.2049	9.39788
CREB/ATF/2	same	19.5	85	92.6539	102.371	10.1178	0.231011	0.469632	-0.756472	0.986154	93.9547	103.808	9.69303
CREB/ATF/2	opp	20.5	75	84.3205	93.0655	9.64705	0.168633	0.455176	-0.966155	0.931826	90.4896	99.8744	9.5126
CREB/ATF/2	same	20.5	101	94.6902	104.668	10.2307	0.239281	0.469632	0.616751	0.986154	96.0196	106.138	9.79896
CREB/ATF/2	same	21.5	91	96.9703	107.301	10.3586	0.293306	0.49395	-0.576366	0.986154	98.3318	108.807	9.91624
CREB/ATF/2	opp	21.5	91	88.0495	96.7353	9.83541	0.35085	0.49395	0.299986	0.931826	94.4914	103.813	9.72067
CREB/ATF/2	same	22.5	106	93.3503	102.925	10.1452	0.0888812	0.375004	1.24687	0.986154	94.6609	104.37	9.72938
CREB/ATF/2	opp	22.5	96	96.3568	106.868	10.3377	0.512596	0.523037	-0.0345146	0.931826	103.406	114.686	10.1689
CREB/ATF/2	opp	23.5	99	94.9806	104.836	10.2389	0.316641	0.49395	0.392563	0.931826	101.93	112.506	10.096
CREB/ATF/2	same	23.5	96	93.0348	102.397	10.1191	0.354106	0.49395	0.293032	0.986154	94.341	103.835	9.71293
CREB/ATF/2	opp	24.5	84	92.1911	101.568	10.0781	0.213328	0.469632	-0.812762	0.931826	98.936	108.998	9.94666
CREB/ATF/2	same	24.5	85	92.0896	101.451	10.0723	0.249039	0.469632	-0.703873	0.986154	93.3825	102.875	9.66346
CREB/ATF/2	same	25.5	83	90.2348	99.1714	9.95849	0.241871	0.469632	-0.726499	0.986154	91.5017	100.564	9.56565
CREB/ATF/2	opp	25.5	98	96.8895	106.562	10.3229	0.428549	0.500276	0.107575	0.931826	103.978	114.358	10.197
CREB/ATF/2	opp	26.5	112	95.0681	104.969	10.2455	0.0397482	0.250031	1.65262	0.931826	102.024	112.649	10.1007
CREB/ATF/2	same	26.5	88	87.6084	96.7582	9.83657	0.455056	0.50371	0.0398107	0.986154	88.8384	98.1166	9.42541
CREB/ATF/2	opp	27.5	96	93.6544	103.584	10.1776	0.378383	0.49395	0.230469	0.931826	100.506	111.162	10.0253
CREB/ATF/2	same	27.5	92	91.3729	100.786	10.0392	0.446269	0.500276	0.0624663	0.986154	92.6558	102.201	9.62579
CREB/ATF/2	opp	28.5	104	89.3549	98.8227	9.94096	0.0573935	0.283113	1.47321	0.931826	95.8923	106.053	9.79246
CREB/ATF/2	same	28.5	91	89.8335	99.0979	9.95479	0.423541	0.500276	0.117183	0.986154	91.0947	100.489	9.54436
CREB/ATF/2	same	29.5	101	91.3848	100.722	10.0361	0.145348	0.444885	0.958062	0.986154	92.6679	102.136	9.62642
CREB/ATF/2	opp	29.5	96	96.7625	106.93	10.3407	0.496121	0.516928	-0.0737355	0.931826	103.842	114.753	10.1903
CREB/ATF/2	opp	30.5	118	91.8359	101.403	10.0699	0.00369767	0.065079	2.59824	0.931826	98.5548	108.822	9.92748
CREB/ATF/2	same	30.5	87	88.6215	98.0924	9.90416	0.45953	0.505483	-0.163718	0.986154	89.8657	99.4696	9.47975
CREB/ATF/2	opp	31.5	94	87.3973	96.0141	9.79868	0.221417	0.469632	0.673836	0.931826	93.7915	103.039	9.6846
CREB/ATF/2	same	31.5	94	91.4964	101.062	10.0529	0.370826	0.49395	0.249043	0.986154	92.781	102.48	9.63229
CREB/ATF/2	opp	32.5	109	96.6787	107.144	10.351	0.0979638	0.375004	1.19034	0.931826	103.752	114.983	10.1859
CREB/ATF/2	same	32.5	80	92.1272	101.632	10.0813	0.111132	0.389864	-1.20295	0.986154	93.4207	103.059	9.66544
CREB/ATF/2	opp	33.5	88	98.3476	109.08	10.4442	0.160311	0.450011	-0.990757	0.931826	105.543	117.061	10.2734
CREB/ATF/2	same	33.5	81	86.3473	95.3899	9.76677	0.305548	0.49395	-0.547498	0.986154	87.5596	96.7292	9.35733
CREB/ATF/2	same	34.5	81	89.465	98.8945	9.94457	0.201253	0.469632	-0.851217	0.986154	90.7211	100.283	9.52476
CREB/ATF/2	opp	34.5	91	92.0342	101.604	10.0799	0.484715	0.513914	-0.102599	0.931826	98.7676	109.037	9.93819
CREB/ATF/2	opp	35.5	100	96.8342	106.857	10.3372	0.349354	0.49395	0.306256	0.931826	103.919	114.675	10.1941
CREB/ATF/2	same	35.5	85	85.1134	93.4608	9.66751	0.523904	0.526898	-0.0117262	0.986154	86.3084	94.773	9.29023
CREB/ATF/2	same	36.5	78	88.276	97.2532	9.86171	0.148582	0.444885	-1.04201	0.986154	89.5154	98.6187	9.46126
CREB/ATF/2	opp	36.5	106	98.4774	108.721	10.4269	0.207705	0.469632	0.721457	0.931826	105.682	116.676	10.2802
CREB/ATF/2	opp	37.5	105	93.4627	103.082	10.153	0.108111	0.389829	1.13635	0.931826	100.301	110.624	10.015
CREB/ATF/2	same	37.5	96	86.6485	95.2089	9.75751	0.145308	0.444885	0.958388	0.986154	87.8651	96.5457	9.37364
CREB/ATF/2	opp	38.5	103	95.3616	105.325	10.2628	0.200792	0.469632	0.744277	0.931826	102.339	113.031	10.1163
CREB/ATF/2	same	38.5	84	87.01	95.9095	9.79334	0.400362	0.494408	-0.307348	0.986154	88.2316	97.2561	9.39317
CREB/ATF/2	same	39.5	91	88.4531	97.7531	9.88702	0.36701	0.49395	0.257604	0.986154	89.6949	99.1256	9.47074
CREB/ATF/2	opp	39.5	91	92.3602	102.368	10.1177	0.471199	0.505676	-0.13444	0.931826	99.1175	109.858	9.95578
CREB/ATF/2	same	40.5	95	89.4658	98.6419	9.93186	0.258353	0.478633	0.557219	0.986154	90.7219	100.027	9.5248
CREB/ATF/2	opp	40.5	94	93.2937	102.921	10.145	0.443594	0.500276	0.0696209	0.931826	100.119	110.451	10.006
CREB/ATF/2	opp	41.5	101	94.3084	104.452	10.2202	0.227113	0.469632	0.654742	0.931826	101.208	112.094	10.0602
CREB/ATF/2	same	41.5	90	87.0874	95.9563	9.79573	0.351564	0.49395	0.297332	0.986154	88.3101	97.3035	9.39735
CREB/ATF/2	opp	42.5	103	91.6048	100.854	10.0426	0.108532	0.389829	1.13469	0.931826	98.3068	108.233	9.91498
CREB/ATF/2	same	42.5	86	90.777	99.866	9.9933	0.331839	0.49395	-0.47802	0.986154	92.0515	101.268	9.59435
CREB/ATF/2	opp	43.5	87	90.8946	99.8658	9.99329	0.366667	0.49395	-0.389723	0.931826	97.5447	107.172	9.87647
CREB/ATF/2	same	43.5	91	89.2452	98.3394	9.91662	0.399254	0.494408	0.176957	0.986154	90.4982	99.7201	9.51305
CREB/ATF/2	same	44.5	97	90.2618	99.6594	9.98296	0.220843	0.469632	0.674974	0.986154	91.529	101.059	9.56708
CREB/ATF/2	opp	44.5	89	88.8042	97.662	9.88241	0.463578	0.505676	0.0198109	0.931826	95.3013	104.807	9.76224
CREB/ATF/3	same	-42.5	59	41.2252	45.9204	6.77646	0.0035543	0.130574	2.62302	0.847917	48.6194	54.1568	6.97276
CREB/ATF/3	opp	-42.5	68	62.4049	69.1505	8.31568	0.217608	0.41211	0.672843	1.00042	62.3788	69.1217	7.89803
CREB/ATF/3	opp	-41.5	79	67.629	74.7348	8.64493	0.0772448	0.388431	1.31534	1.00042	67.6008	74.7036	8.22197
CREB/ATF/3	same	-41.5	41	39.2674	43.1165	6.56632	0.352192	0.484041	0.26386	0.847917	46.3104	50.85	6.80518
CREB/ATF/3	opp	-40.5	79	65.8008	72.8383	8.53454	0.0489934	0.320734	1.54656	1.00042	65.7734	72.8079	8.11008
CREB/ATF/3	same	-40.5	45	43.1327	47.5633	6.89662	0.351064	0.484041	0.270759	0.847917	50.869	56.0943	7.13225
CREB/ATF/3	opp	-39.5	69	63.7749	70.6785	8.40705	0.233564	0.415963	0.621515	1.00042	63.7483	70.6491	7.98425
CREB/ATF/3	same	-39.5	46	47.5886	52.443	7.24175	0.446661	0.488275	-0.219372	0.847917	56.1242	61.8492	7.49161
CREB/ATF/3	same	-38.5	41	53.028	59.1178	7.68881	0.05235	0.329057	-1.56435	0.847917	62.5392	69.7213	7.90817
CREB/ATF/3	opp	-38.5	54	56.3948	62.1238	7.88187	0.40851	0.484041	-0.303837	1.00042	56.3713	62.0979	7.50808
CREB/ATF/3	same	-37.5	47	42.2127	46.4897	6.81834	0.205299	0.40555	0.702124	0.847917	49.784	54.8281	7.05578
CREB/ATF/3	opp	-37.5	58	57.6242	63.7341	7.98336	0.445503	0.488275	0.0470762	1.00042	57.6002	63.7075	7.58948
CREB/ATF/3	opp	-36.5	56	58.7736	65.3581	8.08444	0.391049	0.484041	-0.343083	1.00042	58.7491	65.3309	7.6648
CREB/ATF/3	same	-36.5	43	43.4163	47.8639	6.91837	0.515176	0.53024	-0.0601763	0.847917	51.2035	56.4488	7.15566
CREB/ATF/3	same	-35.5	24	41.8163	46.0963	6.78942	0.00201091	0.130574	-2.62412	0.847917	49.3164	54.3641	7.02257
CREB/ATF/3	opp	-35.5	64	57.5158	63.4755	7.96715	0.177547	0.397719	0.813861	1.00042	57.4919	63.4491	7.58234
CREB/ATF/3	opp	-34.5	76	67.0384	75.7699	8.70459	0.125109	0.393269	1.02952	1.00042	67.0105	75.7383	8.18599
CREB/ATF/3	same	-34.5	33	40.229	44.1148	6.6419	0.143301	0.397719	-1.0884	0.847917	47.4446	52.0273	6.888
CREB/ATF/3	same	-33.5	48	42.3162	46.3622	6.80898	0.170079	0.397719	0.834748	0.847917	49.9061	54.6778	7.06442
CREB/ATF/3	opp	-33.5	52	59.3293	65.2867	8.08002	0.188783	0.397719	-0.907095	1.00042	59.3046	65.2595	7.70095
CREB/ATF/3	same	-32.5	40	42.5656	47.1634	6.86756	0.384613	0.484041	-0.373584	0.847917	50.2002	55.6226	7.08521
CREB/ATF/3	opp	-32.5	58	58.9548	65.3475	8.08378	0.485032	0.508129	-0.11811	1.00042	58.9302	65.3203	7.6766
CREB/ATF/3	same	-31.5	43	46.234	50.5378	7.10899	0.35148	0.484041	-0.454922	0.847917	54.5266	59.6023	7.38421
CREB/ATF/3	opp	-31.5	54	55.8986	62.0671	7.87827	0.434305	0.486864	-0.240998	1.00042	55.8753	62.0412	7.47498
CREB/ATF/3	same	-30.5	60	55.2883	61.1514	7.81994	0.2381	0.415963	0.602523	0.847917	65.2049	72.1196	8.07495
CREB/ATF/3	opp	-30.5	57	55.5149	61.3768	7.83433	0.386998	0.484041	0.189569	1.00042	55.4917	61.3512	7.44928
CREB/ATF/3	opp	-29.5	46	53.9653	59.3461	7.70364	0.154384	0.397719	-1.03396	1.00042	53.9428	59.3213	7.34458
CREB/ATF/3	same	-29.5	53	57.5811	64.875	8.0545	0.300806	0.46311	-0.56876	0.847917	67.9089	76.5111	8.24068
CREB/ATF/3	opp	-28.5	69	54.4173	60.0068	7.74641	0.0237763	0.217661	1.88252	1.00042	54.3946	59.9818	7.37527
CREB/ATF/3	same	-28.5	40	45.7428	50.5343	7.10875	0.221978	0.41435	-0.807851	0.847917	53.9473	59.5982	7.34488
CREB/ATF/3	opp	-27.5	65	61.4631	68.1403	8.25471	0.297882	0.46311	0.428469	1.00042	61.4375	68.1119	7.83821
CREB/ATF/3	same	-27.5	44	46.0685	50.6344	7.11579	0.417747	0.484041	-0.290695	0.847917	54.3314	59.7163	7.37098
CREB/ATF/3	same	-26.5	67	47.4719	52.5928	7.25209	0.00293894	0.130574	2.69275	0.847917	55.9865	62.0259	7.48241
CREB/ATF/3	opp	-26.5	62	58.7789	64.7806	8.04864	0.307863	0.46311	0.400199	1.00042	58.7544	64.7536	7.66514
CREB/ATF/3	same	-25.5	51	45.0589	49.9883	7.07024	0.167955	0.397719	0.84029	0.847917	53.1407	58.9543	7.28977
CREB/ATF/3	opp	-25.5	59	53.332	58.8132	7.66898	0.197245	0.397719	0.73908	1.00042	53.3098	58.7887	7.30136
CREB/ATF/3	opp	-24.5	48	50.5926	55.7128	7.4641	0.392574	0.484041	-0.347348	1.00042	50.5716	55.6895	7.11137
CREB/ATF/3	same	-24.5	52	51.7925	56.9695	7.54781	0.451747	0.490008	0.0274954	0.847917	61.082	67.1875	7.8155
CREB/ATF/3	opp	-23.5	47	57.4282	63.5013	7.96877	0.0920678	0.393269	-1.30863	1.00042	57.4042	63.4748	7.57656
CREB/ATF/3	same	-23.5	54	49.1053	54.5523	7.38595	0.217763	0.41211	0.6627	0.847917	57.9129	64.3368	7.61005
CREB/ATF/3	same	-22.5	61	46.7952	52.0678	7.2158	0.0190907	0.198159	1.96857	0.847917	55.1884	61.4068	7.42889
CREB/ATF/3	opp	-22.5	53	54.7337	60.9683	7.80822	0.442462	0.488275	-0.22204	1.00042	54.7109	60.9429	7.39668
CREB/ATF/3	same	-21.5	33	45.3788	49.8075	7.05744	0.0340683	0.274051	-1.754	0.847917	53.5179	58.741	7.31559
CREB/ATF/3	opp	-21.5	54	52.7887	58.1411	7.62503	0.398535	0.484041	0.158854	1.00042	52.7667	58.1169	7.26407
CREB/ATF/3	same	-20.5	50	46.8322	51.6948	7.18991	0.290033	0.46311	0.44059	0.847917	55.2321	60.9669	7.43183
CREB/ATF/3	opp	-20.5	54	55.1527	61.001	7.81032	0.473878	0.499417	-0.147584	1.00042	55.1297	60.9756	7.42494
CREB/ATF/3	opp	-19.5	63	54.6894	60.5762	7.78307	0.118328	0.393269	1.06778	1.00042	54.6666	60.551	7.39369
CREB/ATF/3	same	-19.5	41	46.6978	51.6789	7.18881	0.22648	0.415213	-0.792586	0.847917	55.0735	60.9481	7.42115
CREB/ATF/3	same	-18.5	38	44.5743	49.1787	7.01275	0.182441	0.397719	-0.937475	0.847917	52.5692	57.9994	7.25046
CREB/ATF/3	opp	-18.5	51	53.4775	58.6045	7.65536	0.401636	0.484041	-0.323624	1.00042	53.4552	58.58	7.3113
CREB/ATF/3	same	-17.5	54	47.8994	52.9006	7.27328	0.169387	0.397719	0.838769	0.847917	56.4907	62.3889	7.51603
CREB/ATF/3	opp	-17.5	49	49.1466	53.8785	7.3402	0.529554	0.538737	-0.0199766	1.00042	49.1261	53.856	7.009
CREB/ATF/3	same	-16.5	33	39.9519	44.3835	6.66209	0.153147	0.397719	-1.0435	0.847917	47.1177	52.3441	6.86423
CREB/ATF/3	opp	-16.5	54	52.7481	57.7497	7.59932	0.396363	0.484041	0.164741	1.00042	52.7261	57.7256	7.26127
CREB/ATF/3	same	-15.5	37	40.0866	44.308	6.65643	0.349617	0.484041	-0.463705	0.847917	47.2766	52.2552	6.8758
CREB/ATF/3	opp	-15.5	56	55.3863	60.9715	7.80843	0.43191	0.486864	0.0785921	1.00042	55.3632	60.9461	7.44065
CREB/ATF/3	opp	-14.5	38	52.1925	57.5826	7.58832	0.0247342	0.217661	-1.87031	1.00042	52.1708	57.5586	7.22294
CREB/ATF/3	same	-14.5	52	50.9449	56.4337	7.51224	0.405139	0.484041	0.140453	0.847917	60.0824	66.5557	7.75128
CREB/ATF/3	opp	-13.5	61	51.4453	57.4971	7.58268	0.0834681	0.391044	1.26007	1.00042	51.4238	57.4731	7.17104
CREB/ATF/3	same	-13.5	45	50.2819	55.2996	7.43637	0.254131	0.425972	-0.710281	0.847917	59.3005	65.2182	7.70068
CREB/ATF/3	opp	-12.5	61	52.4747	58.0453	7.61875	0.10842	0.393269	1.11899	1.00042	52.4528	58.0211	7.24243
CREB/ATF/3	same	-12.5	45	42.8388	46.7932	6.84055	0.334414	0.484041	0.315937	0.847917	50.5224	55.186	7.10791
CREB/ATF/3	opp	-11.5	65	56.8814	63.1442	7.94633	0.127731	0.394397	1.02167	1.00042	56.8577	63.1179	7.54041
CREB/ATF/3	same	-11.5	44	43.1822	47.5099	6.89275	0.411053	0.484041	0.11865	0.847917	50.9274	56.0314	7.13634
CREB/ATF/3	same	-10.5	52	44.6383	49.5693	7.04055	0.121245	0.393269	1.04562	0.847917	52.6446	58.4601	7.25566
CREB/ATF/3	opp	-10.5	62	66.8622	73.9714	8.60066	0.301952	0.46311	-0.565331	1.00042	66.8343	73.9405	8.17523
CREB/ATF/3	same	-9.5	41	38.5756	42.5087	6.51987	0.31148	0.464581	0.371847	0.847917	45.4946	50.1331	6.74497
CREB/ATF/3	opp	-9.5	54	56.2798	61.5962	7.84832	0.414442	0.484041	-0.290487	1.00042	56.2564	61.5705	7.50043
CREB/ATF/3	opp	-8.5	53	61.705	68.2039	8.25856	0.147482	0.397719	-1.05406	1.00042	61.6793	68.1754	7.85362
CREB/ATF/3	same	-8.5	42	36.8888	40.4841	6.36271	0.176528	0.397719	0.803307	0.847917	43.5052	47.7453	6.59585
CREB/ATF/3	same	-7.5	42	37.8971	41.84	6.46838	0.223655	0.41435	0.634299	0.847917	44.6944	49.3445	6.68538
CREB/ATF/3	opp	-7.5	81	75.7523	84.7635	9.20671	0.251037	0.424831	0.569989	1.00042	75.7207	84.7282	8.70176
CREB/ATF/3	opp	-6.5	66	79.8352	87.7191	9.36585	0.064514	0.366273	-1.47719	1.00042	79.8019	87.6825	8.93319
CREB/ATF/3	same	-6.5	33	30.7854	33.7879	5.81273	0.304315	0.46311	0.380989	0.847917	36.3071	39.8481	6.02554
CREB/ATF/3	same	-5.5	21	26.0274	29.079	5.3925	0.189066	0.397719	-0.932299	0.847917	30.6957	34.2947	5.54037
CREB/ATF/3	opp	-5.5	65	63.2249	68.3762	8.26899	0.380067	0.484041	0.214666	1.00042	63.1986	68.3477	7.94975
CREB/ATF/3	opp	-4.5	116	93.2537	101.367	10.0681	0.00982371	0.172897	2.25925	1.00042	93.2148	101.324	9.65478
CREB/ATF/3	same	-4.5	31	23.5291	25.4531	5.0451	0.0554325	0.336418	1.48081	0.847917	27.7493	30.0183	5.26776
CREB/ATF/3	same	-3.5	26	27.1977	28.2346	5.31363	0.459332	0.492941	-0.225397	0.847917	32.0759	33.2988	5.66356
CREB/ATF/3	opp	-3.5	0	0.343674	0.36805	0.606671	0.70916	0.717311	-0.566492	1.00042	0.343531	0.367896	0.586115
CREB/ATF/3	same	-2.5	14	6.89071	8.46693	2.9098	0.00498312	0.130574	2.44323	0.847917	8.12663	9.98557	2.85072
CREB/ATF/3	opp	-2.5	1	0.514808	0.577172	0.759718	0.0947276	0.393269	0.638647	1.00042	0.514594	0.576931	0.717352
CREB/ATF/3	opp	-1.5	205	259.594	288.567	16.9873	0.000255717	0.0450062	-3.2138	1.00042	259.485	288.447	16.1086
CREB/ATF/3	same	-1.5	0	0	0	0	1	1	0	0.847917	0	0	0
CREB/ATF/3	same	-0.5	4	3.55062	3.58468	1.89332	0.284147	0.458806	0.237348	0.847917	4.18747	4.22763	2.04633
CREB/ATF/3	opp	-0.5	19	18.3642	20.0523	4.47798	0.381662	0.484041	0.14199	1.00042	18.3565	20.0439	4.28445
CREB/ATF/3	opp	0.5	10	13.1823	14.0298	3.74563	0.236353	0.415963	-0.849616	0.912956	13.7792	14.665	3.71203
CREB/ATF/3	same	0.5	0	0.876685	0.942781	0.970969	0.41616	0.484041	-0.902897	0.899009	1.00369	1.07936	1.00184
CREB/ATF/3	opp	1.5	102	78.8484	89.7731	9.47487	0.00519329	0.130574	2.44348	0.912956	86.366	98.3323	9.29333
CREB/ATF/3	same	1.5	2	1.68456	1.83087	1.3531	0.238706	0.415963	0.233126	0.899009	1.87379	2.03655	1.36887
CREB/ATF/3	same	2.5	24	15.3012	15.9503	3.99378	0.0139005	0.198159	2.17808	0.899009	17.0201	17.7421	4.12554
CREB/ATF/3	opp	2.5	44	53.5181	60.0629	7.75002	0.106293	0.393269	-1.22814	0.912956	58.6207	65.7894	7.65641
CREB/ATF/3	opp	3.5	174	157.652	173.065	13.1554	0.0914292	0.393269	1.24269	0.912956	172.683	189.566	13.1409
CREB/ATF/3	same	3.5	0	0	0	0	1	1	0	0.899009	0	0	0
CREB/ATF/3	same	4.5	4	1.47206	1.63492	1.27864	0.0172913	0.198159	1.97705	0.899009	1.63742	1.81858	1.27962
CREB/ATF/3	opp	4.5	44	34.1358	36.7406	6.0614	0.0426066	0.320734	1.62737	0.912956	37.3904	40.2436	6.11477
CREB/ATF/3	opp	5.5	36	29.8472	33.139	5.75664	0.113946	0.393269	1.06882	0.912956	32.6929	36.2985	5.71777
CREB/ATF/3	same	5.5	60	59.5942	63.661	7.97879	0.444875	0.488275	0.0508616	0.899009	66.2888	70.8125	8.14179
CREB/ATF/3	same	6.5	27	41.9194	45.3051	6.73091	0.00938787	0.172897	-2.21655	0.899009	46.6285	50.3945	6.8285
CREB/ATF/3	opp	6.5	63	52.7902	59.225	7.69578	0.0734946	0.388431	1.32668	0.912956	57.8233	64.8716	7.60417
CREB/ATF/3	same	7.5	49	60.5402	66.825	8.17465	0.0744397	0.388431	-1.4117	0.899009	67.341	74.3318	8.20616
CREB/ATF/3	opp	7.5	44	37.2782	40.7699	6.38513	0.120204	0.393269	1.05272	0.912956	40.8324	44.657	6.39003
CREB/ATF/3	same	8.5	66	48.7805	53.7354	7.33044	0.00764296	0.168145	2.34903	0.899009	54.2604	59.7718	7.36616
CREB/ATF/3	opp	8.5	55	49.265	54.5351	7.38479	0.185708	0.397719	0.7766	0.912956	53.962	59.7347	7.34589
CREB/ATF/3	same	9.5	57	48.3033	53.4535	7.31119	0.0955032	0.393269	1.18951	0.899009	53.7295	59.4583	7.33004
CREB/ATF/3	opp	9.5	52	54.0496	60.0049	7.74629	0.42506	0.486864	-0.264593	0.912956	59.2029	65.726	7.69434
CREB/ATF/3	opp	10.5	49	51.5179	57.1193	7.55773	0.397598	0.484041	-0.33315	0.912956	56.4297	62.5652	7.51197
CREB/ATF/3	same	10.5	45	44.4835	49.2237	7.01596	0.429835	0.486864	0.0736191	0.899009	49.4806	54.7532	7.03424
CREB/ATF/3	opp	11.5	64	52.2275	58.0316	7.61785	0.0484852	0.320734	1.54538	0.912956	57.2071	63.5645	7.56353
CREB/ATF/3	same	11.5	51	45.4601	50.2543	7.08903	0.183728	0.397719	0.781475	0.899009	50.5669	55.8997	7.11104
CREB/ATF/3	opp	12.5	54	48.5597	53.6266	7.32302	0.195058	0.397719	0.742904	0.912956	53.1895	58.7395	7.29311
CREB/ATF/3	same	12.5	49	54.5849	60.1762	7.75733	0.249395	0.424831	-0.719953	0.899009	60.7168	66.9362	7.7921
CREB/ATF/3	opp	13.5	60	51.2715	56.8977	7.54305	0.101071	0.393269	1.15716	0.912956	56.1599	62.3224	7.49399
CREB/ATF/3	same	13.5	45	47.1541	52.1483	7.22138	0.413779	0.484041	-0.298299	0.899009	52.4512	58.0064	7.24232
CREB/ATF/3	same	14.5	48	45.7507	50.329	7.09429	0.334708	0.484041	0.317055	0.899009	50.8902	55.9827	7.13373
CREB/ATF/3	opp	14.5	50	51.3256	56.9113	7.54396	0.463282	0.49383	-0.175716	0.912956	56.2191	62.3374	7.49794
CREB/ATF/3	same	15.5	71	55.2604	60.902	7.80398	0.0174135	0.198159	2.01687	0.899009	61.4681	67.7435	7.84016
CREB/ATF/3	opp	15.5	39	47.6547	52.8439	7.26938	0.1165	0.393269	-1.19057	0.912956	52.1982	57.8821	7.22483
CREB/ATF/3	same	16.5	44	52.3323	57.5789	7.58808	0.138337	0.397719	-1.09808	0.899009	58.2111	64.0471	7.62962
CREB/ATF/3	opp	16.5	51	45.5135	50.5002	7.10635	0.185886	0.397719	0.772058	0.912956	49.8529	55.3151	7.06066
CREB/ATF/3	opp	17.5	50	47.7994	52.5752	7.25087	0.340552	0.484041	0.303489	0.912956	52.3568	57.5878	7.2358
CREB/ATF/3	same	17.5	53	52.3976	57.705	7.59638	0.430636	0.486864	0.0792965	0.899009	58.2838	64.1873	7.63438
CREB/ATF/3	opp	18.5	57	50.5192	55.8043	7.47022	0.162627	0.397719	0.867545	0.912956	55.3359	61.1248	7.43881
CREB/ATF/3	same	18.5	44	44.4832	48.9807	6.99862	0.510997	0.529032	-0.0690456	0.899009	49.4803	54.483	7.03422
CREB/ATF/3	same	19.5	41	47.3806	52.5785	7.2511	0.198174	0.397719	-0.87995	0.899009	52.7032	58.4849	7.25969
CREB/ATF/3	opp	19.5	51	48.0622	53.1394	7.28968	0.303641	0.46311	0.403008	0.912956	52.6446	58.2059	7.25566
CREB/ATF/3	opp	20.5	54	48.3807	53.3221	7.3022	0.187901	0.397719	0.769529	0.912956	52.9935	58.4059	7.27966
CREB/ATF/3	same	20.5	46	48.2508	52.7201	7.26086	0.409281	0.484041	-0.309993	0.899009	53.6711	58.6424	7.32606
CREB/ATF/3	same	21.5	63	57.3822	63.2532	7.95319	0.207384	0.40555	0.706353	0.899009	63.8283	70.3589	7.98926
CREB/ATF/3	opp	21.5	51	51.6099	56.9684	7.54774	0.503173	0.524014	-0.0808106	0.912956	56.5306	62.4	7.51868
CREB/ATF/3	same	22.5	43	53.5337	59.7452	7.7295	0.0816125	0.391044	-1.36279	0.899009	59.5475	66.4568	7.7167
CREB/ATF/3	opp	22.5	47	52.5891	58.0422	7.61854	0.245052	0.422835	-0.733621	0.912956	57.6031	63.5761	7.58967
CREB/ATF/3	opp	23.5	41	55.9598	61.9891	7.87332	0.0225735	0.217661	-1.90007	0.912956	61.2952	67.8993	7.82913
CREB/ATF/3	same	23.5	44	46.8238	51.4305	7.1715	0.375301	0.484041	-0.393759	0.899009	52.0838	57.208	7.21691
CREB/ATF/3	opp	24.5	38	53.0091	58.3058	7.63582	0.0191404	0.198159	-1.96562	0.912956	58.0632	63.8648	7.61992
CREB/ATF/3	same	24.5	60	51.7218	57.2173	7.56421	0.112967	0.393269	1.09439	0.899009	57.5321	63.6448	7.58499
CREB/ATF/3	same	25.5	43	49.5138	54.475	7.38072	0.198044	0.397719	-0.882547	0.899009	55.076	60.5945	7.42132
CREB/ATF/3	opp	25.5	45	51.3196	56.521	7.51805	0.210495	0.407111	-0.840592	0.912956	56.2126	61.9099	7.4975
CREB/ATF/3	opp	26.5	70	50.8615	56.1886	7.4959	0.00436839	0.130574	2.55319	0.912956	55.7108	61.5458	7.46397
CREB/ATF/3	same	26.5	52	51.1804	56.6385	7.52585	0.418035	0.484041	0.108907	0.899009	56.9298	63.001	7.54518
CREB/ATF/3	opp	27.5	40	55.9705	61.9946	7.87366	0.0156739	0.198159	-2.02834	0.912956	61.3069	67.9053	7.82987
CREB/ATF/3	same	27.5	58	47.4283	52.1494	7.22145	0.0577549	0.338829	1.46393	0.899009	52.7562	58.0076	7.26335
CREB/ATF/3	opp	28.5	43	53.8713	59.4226	7.7086	0.0750909	0.388431	-1.41028	0.912956	59.0075	65.0881	7.68164
CREB/ATF/3	same	28.5	53	46.741	51.3553	7.16626	0.161084	0.397719	0.873402	0.899009	51.9917	57.1244	7.21052
CREB/ATF/3	same	29.5	56	48.9055	54.2132	7.36296	0.139437	0.397719	0.963542	0.899009	54.3993	60.3033	7.37559
CREB/ATF/3	opp	29.5	55	49.4606	54.7622	7.40015	0.193412	0.397719	0.748553	0.912956	54.1763	59.9834	7.36046
CREB/ATF/3	same	30.5	48	45.7668	50.5414	7.10925	0.335582	0.484041	0.31413	0.899009	50.908	56.2191	7.13499
CREB/ATF/3	opp	30.5	52	53.2926	59.0516	7.68451	0.465771	0.49383	-0.168208	0.912956	58.3737	64.6818	7.64027
CREB/ATF/3	same	31.5	56	48.646	53.4743	7.31261	0.131148	0.397719	1.00565	0.899009	54.1108	59.4814	7.356
CREB/ATF/3	opp	31.5	41	47.7572	52.8175	7.26757	0.183626	0.397719	-0.929776	0.912956	52.3105	57.8533	7.2326
CREB/ATF/3	same	32.5	44	49.0476	53.8162	7.33595	0.26254	0.435916	-0.688059	0.899009	54.5574	59.8617	7.3863
CREB/ATF/3	opp	32.5	46	50.7993	56.2458	7.49972	0.278182	0.453334	-0.639934	0.912956	55.6427	61.6084	7.4594
CREB/ATF/3	opp	33.5	64	57.8139	63.7468	7.98416	0.188156	0.397719	0.774793	0.912956	63.3261	69.8246	7.95777
CREB/ATF/3	same	33.5	50	47.1656	52.2792	7.23043	0.30713	0.46311	0.392007	0.899009	52.464	58.152	7.2432
CREB/ATF/3	opp	34.5	44	56.6333	62.4033	7.89957	0.0492035	0.320734	-1.59924	0.912956	62.0329	68.353	7.8761
CREB/ATF/3	same	34.5	43	45.8926	50.9316	7.13663	0.370159	0.484041	-0.405319	0.899009	51.048	56.653	7.14479
CREB/ATF/3	same	35.5	35	44.5201	49.0413	7.00295	0.08443	0.391044	-1.35945	0.899009	49.5214	54.5504	7.03714
CREB/ATF/3	opp	35.5	62	57.9349	63.9219	7.99511	0.269674	0.443577	0.508452	0.912956	63.4585	70.0163	7.96609
CREB/ATF/3	same	36.5	53	46.5042	51.3948	7.16902	0.152552	0.397719	0.906092	0.899009	51.7283	57.1683	7.19224
CREB/ATF/3	opp	36.5	49	49.1913	54.505	7.38275	0.527013	0.538737	-0.0259112	0.912956	53.8813	59.7017	7.34039
CREB/ATF/3	same	37.5	59	50.8953	55.9554	7.48034	0.115626	0.393269	1.08347	0.899009	56.6127	62.2412	7.52414
CREB/ATF/3	opp	37.5	42	45.2272	49.6207	7.0442	0.350266	0.484041	-0.458141	0.912956	49.5393	54.3517	7.03842
CREB/ATF/3	same	38.5	59	47.4921	52.1679	7.22273	0.0446479	0.320734	1.59329	0.899009	52.8271	58.0282	7.26823
CREB/ATF/3	opp	38.5	54	46.0289	50.8574	7.13144	0.108063	0.393269	1.11775	0.912956	50.4174	55.7063	7.10052
CREB/ATF/3	same	39.5	59	46.6857	51.6869	7.18936	0.0342564	0.274051	1.71285	0.899009	51.9302	57.4932	7.20626
CREB/ATF/3	opp	39.5	43	48.6922	54.0924	7.35475	0.231616	0.415963	-0.77395	0.912956	53.3347	59.2497	7.30306
CREB/ATF/3	same	40.5	35	50.0307	55.3714	7.44119	0.016048	0.198159	-2.01993	0.899009	55.6509	61.5916	7.45995
CREB/ATF/3	opp	40.5	49	58.2114	64.4291	8.02677	0.125131	0.393269	-1.14758	0.912956	63.7614	70.5719	7.98507
CREB/ATF/3	same	41.5	50	49.0096	53.8539	7.33852	0.406885	0.484041	0.134954	0.899009	54.5152	59.9036	7.38344
CREB/ATF/3	opp	41.5	53	54.5211	60.1716	7.75703	0.453814	0.490008	-0.196093	0.912956	59.7193	65.9085	7.72783
CREB/ATF/3	same	42.5	50	48.9179	54.222	7.36356	0.401775	0.484041	0.14695	0.899009	54.4132	60.3131	7.37653
CREB/ATF/3	opp	42.5	47	46.0095	50.691	7.11976	0.403976	0.484041	0.13912	0.912956	50.3962	55.524	7.09903
CREB/ATF/3	same	43.5	60	53.2157	58.8774	7.67316	0.158806	0.397719	0.884166	0.899009	59.1937	65.4914	7.69374
CREB/ATF/3	opp	43.5	50	47.5365	52.5226	7.24724	0.32655	0.482964	0.339927	0.912956	52.0687	57.5302	7.21587
CREB/ATF/3	same	44.5	57	48.6505	53.7935	7.33441	0.104522	0.393269	1.1384	0.899009	54.1157	59.8364	7.35634
CREB/ATF/3	opp	44.5	53	47.7108	52.4123	7.23963	0.198859	0.397719	0.730593	0.912956	52.2597	57.4094	7.22908
CREB3/XBP1	opp	-42.5	110	117.228	129.439	11.3771	0.270294	0.457264	-0.635306	1.00303	116.874	129.049	10.8108
CREB3/XBP1	same	-42.5	103	102.91	113.403	10.6491	0.470303	0.489783	0.00842511	0.933858	110.199	121.435	10.4976
CREB3/XBP1	same	-41.5	113	104.301	114.732	10.7113	0.182981	0.411817	0.812132	0.933858	111.688	122.859	10.5683
CREB3/XBP1	opp	-41.5	107	115.983	128.073	11.317	0.217138	0.424625	-0.793758	1.00303	115.633	127.687	10.7533
CREB3/XBP1	same	-40.5	108	104.845	115.382	10.7416	0.355269	0.461742	0.293737	0.933858	112.271	123.554	10.5958
CREB3/XBP1	opp	-40.5	112	116.503	128.368	11.33	0.360369	0.461742	-0.39744	1.00303	116.151	127.981	10.7773
CREB3/XBP1	same	-39.5	91	103.807	114.788	10.7139	0.111926	0.389562	-1.19538	0.933858	111.159	122.918	10.5432
CREB3/XBP1	opp	-39.5	113	112.534	124.071	11.1387	0.457539	0.486888	0.0418338	1.00303	112.194	123.696	10.5922
CREB3/XBP1	same	-38.5	82	100.042	110.21	10.4981	0.036568	0.295163	-1.71855	0.933858	107.127	118.016	10.3502
CREB3/XBP1	opp	-38.5	118	125.682	137.966	11.7459	0.263737	0.457264	-0.654023	1.00303	125.303	137.55	11.1939
CREB3/XBP1	same	-37.5	104	99.4605	110.016	10.4888	0.302326	0.459613	0.432789	0.933858	106.505	117.808	10.3201
CREB3/XBP1	opp	-37.5	119	121.255	133.432	11.5513	0.442516	0.481437	-0.195232	1.00303	120.889	133.029	10.995
CREB3/XBP1	same	-36.5	113	99.7382	109.884	10.4826	0.0862309	0.389562	1.26513	0.933858	106.802	117.667	10.3345
CREB3/XBP1	opp	-36.5	118	115.143	126.97	11.2681	0.371888	0.464201	0.253585	1.00303	114.795	126.586	10.7142
CREB3/XBP1	same	-35.5	100	98.1199	107.995	10.3921	0.39894	0.467606	0.180914	0.933858	105.069	115.644	10.2503
CREB3/XBP1	opp	-35.5	115	115.985	128.011	11.3142	0.488219	0.496685	-0.0870324	1.00303	115.634	127.624	10.7533
CREB3/XBP1	same	-34.5	91	96.7992	106.671	10.3281	0.299265	0.459613	-0.561491	0.933858	103.655	114.226	10.1811
CREB3/XBP1	opp	-34.5	117	120.777	133.315	11.5462	0.388094	0.467606	-0.327113	1.00303	120.412	132.912	10.9732
CREB3/XBP1	opp	-33.5	142	117.771	129.545	11.3818	0.0132061	0.185459	2.12875	1.00303	117.415	129.154	10.8358
CREB3/XBP1	same	-33.5	83	93.1281	102.398	10.1192	0.159122	0.411817	-1.00089	0.933858	99.7241	109.65	9.98619
CREB3/XBP1	same	-32.5	81	97.3881	107.027	10.3454	0.0505428	0.347823	-1.58409	0.933858	104.286	114.607	10.212
CREB3/XBP1	opp	-32.5	133	115.734	127.613	11.2966	0.0518896	0.347823	1.52842	1.00303	115.385	127.228	10.7417
CREB3/XBP1	opp	-31.5	141	115.704	127.747	11.3025	0.00986673	0.180185	2.23805	1.00303	115.355	127.361	10.7403
CREB3/XBP1	same	-31.5	82	99.9996	109.903	10.4834	0.0368953	0.295163	-1.71695	0.933858	107.082	117.687	10.3481
CREB3/XBP1	opp	-30.5	113	116.311	127.994	11.3134	0.402768	0.467606	-0.292677	1.00303	115.96	127.607	10.7685
CREB3/XBP1	same	-30.5	99	98.7653	108.237	10.4037	0.463901	0.486888	0.0225625	0.933858	105.76	115.903	10.284
CREB3/XBP1	opp	-29.5	140	117.248	129.944	11.3993	0.0180148	0.205895	1.99588	1.00303	116.894	129.552	10.8118
CREB3/XBP1	same	-29.5	108	105.604	116.146	10.7771	0.383343	0.466245	0.222335	0.933858	113.083	124.372	10.6341
CREB3/XBP1	opp	-28.5	98	111.034	122.02	11.0463	0.115688	0.389562	-1.17992	1.00303	110.698	121.652	10.5213
CREB3/XBP1	same	-28.5	113	102.928	113.697	10.6629	0.148917	0.411817	0.944566	0.933858	110.218	121.749	10.4985
CREB3/XBP1	opp	-27.5	112	114.267	125.604	11.2073	0.440342	0.481437	-0.202299	1.00303	113.922	125.225	10.6734
CREB3/XBP1	same	-27.5	98	98.739	108.509	10.4168	0.497101	0.502815	-0.0709474	0.933858	105.732	116.194	10.2826
CREB3/XBP1	opp	-26.5	125	114.732	126.576	11.2506	0.157325	0.411817	0.91268	1.00303	114.385	126.194	10.6951
CREB3/XBP1	same	-26.5	96	99.3208	109.102	10.4452	0.394513	0.467606	-0.317926	0.933858	106.355	116.83	10.3129
CREB3/XBP1	opp	-25.5	103	112.883	124.4	11.1535	0.189462	0.41239	-0.886088	1.00303	112.542	124.024	10.6086
CREB3/XBP1	same	-25.5	103	98.0886	108.03	10.3937	0.288365	0.459613	0.47253	0.933858	105.036	115.681	10.2487
CREB3/XBP1	same	-24.5	119	102.881	113.371	10.6476	0.0533592	0.347823	1.51387	0.933858	110.168	121.401	10.4961
CREB3/XBP1	opp	-24.5	102	114.939	126.206	11.2342	0.121738	0.389562	-1.15177	1.00303	114.592	125.825	10.7048
CREB3/XBP1	same	-23.5	83	102.965	113.761	10.6659	0.0245919	0.227799	-1.87183	0.933858	110.257	121.818	10.5004
CREB3/XBP1	opp	-23.5	124	112.556	124.003	11.1357	0.130891	0.404154	1.02769	1.00303	112.216	123.629	10.5932
CREB3/XBP1	same	-22.5	121	99.134	109.426	10.4607	0.0144397	0.185459	2.0903	0.933858	106.155	117.176	10.3032
CREB3/XBP1	opp	-22.5	119	114.741	126.3	11.2383	0.32392	0.461742	0.379004	1.00303	114.394	125.918	10.6955
CREB3/XBP1	same	-21.5	109	100.035	110.748	10.5237	0.171475	0.411817	0.851842	0.933858	107.121	118.592	10.3499
CREB3/XBP1	opp	-21.5	110	115.37	126.932	11.2664	0.329615	0.461742	-0.476613	1.00303	115.021	126.549	10.7248
CREB3/XBP1	same	-20.5	117	105.213	115.996	10.7701	0.116707	0.389562	1.09443	0.933858	112.665	124.212	10.6144
CREB3/XBP1	opp	-20.5	106	113.164	124.249	11.1467	0.268634	0.457264	-0.642745	1.00303	112.823	123.874	10.6218
CREB3/XBP1	same	-19.5	92	99.8296	109.601	10.469	0.233938	0.433401	-0.747885	0.933858	106.9	117.364	10.3393
CREB3/XBP1	opp	-19.5	116	112.318	123.25	11.1018	0.341697	0.461742	0.331658	1.00303	111.979	122.878	10.582
CREB3/XBP1	same	-18.5	101	92.741	101.577	10.0786	0.180671	0.411817	0.819459	0.933858	99.3096	108.772	9.96542
CREB3/XBP1	opp	-18.5	124	117.03	128.569	11.3388	0.242382	0.442928	0.614742	1.00303	116.676	128.181	10.8017
CREB3/XBP1	same	-17.5	82	96.2356	105.83	10.2874	0.0780687	0.389562	-1.38379	0.933858	103.052	113.326	10.1514
CREB3/XBP1	opp	-17.5	112	116.706	128.147	11.3202	0.353386	0.461742	-0.415742	1.00303	116.354	127.76	10.7867
CREB3/XBP1	opp	-16.5	129	118.437	130.399	11.4192	0.154706	0.411817	0.92506	1.00303	118.079	130.005	10.8664
CREB3/XBP1	same	-16.5	84	92.116	101.068	10.0532	0.215578	0.424625	-0.807302	0.933858	98.6403	108.226	9.93178
CREB3/XBP1	opp	-15.5	91	112.99	123.745	11.1241	0.0189822	0.205895	-1.9768	1.00303	112.649	123.371	10.6136
CREB3/XBP1	same	-15.5	88	94.4637	103.978	10.1969	0.273295	0.457264	-0.63389	0.933858	101.154	111.342	10.0575
CREB3/XBP1	opp	-14.5	99	110.192	120.705	10.9866	0.153959	0.411817	-1.01874	1.00303	109.86	120.34	10.4814
CREB3/XBP1	same	-14.5	93	88.6555	97.276	9.86286	0.298924	0.459613	0.440492	0.933858	94.9347	104.166	9.74344
CREB3/XBP1	opp	-13.5	118	108.91	119.685	10.9401	0.178347	0.411817	0.830892	1.00303	108.581	119.323	10.4202
CREB3/XBP1	same	-13.5	83	89.6759	98.3649	9.91791	0.260419	0.457264	-0.673121	0.933858	96.0274	105.332	9.79936
CREB3/XBP1	same	-12.5	94	98.1473	107.61	10.3735	0.361849	0.461742	-0.399795	0.933858	105.099	115.232	10.2518
CREB3/XBP1	opp	-12.5	107	106.478	116.888	10.8115	0.454222	0.486888	0.0482566	1.00303	106.157	116.535	10.3032
CREB3/XBP1	opp	-11.5	116	102.89	112.821	10.6217	0.0917884	0.389562	1.23429	1.00303	102.579	112.481	10.1281
CREB3/XBP1	same	-11.5	101	96.9997	106.47	10.3184	0.319078	0.461742	0.387681	0.933858	103.87	114.011	10.1917
CREB3/XBP1	same	-10.5	88	95.9075	105.133	10.2534	0.226872	0.424782	-0.771209	0.933858	102.7	112.579	10.1341
CREB3/XBP1	opp	-10.5	113	109.279	120.6	10.9818	0.338313	0.461742	0.338822	1.00303	108.949	120.236	10.4379
CREB3/XBP1	same	-9.5	85	92.8062	101.489	10.0742	0.226284	0.424782	-0.774872	0.933858	99.3794	108.677	9.96892
CREB3/XBP1	opp	-9.5	111	110.73	121.789	11.0358	0.464572	0.486888	0.0244612	1.00303	110.396	121.421	10.5069
CREB3/XBP1	opp	-8.5	139	114.638	126.095	11.2292	0.0119111	0.185459	2.16954	1.00303	114.292	125.714	10.6907
CREB3/XBP1	same	-8.5	87	95.3021	104.886	10.2414	0.21384	0.424625	-0.810645	0.933858	102.052	112.315	10.1021
CREB3/XBP1	opp	-7.5	131	117.635	129.677	11.3876	0.102128	0.389562	1.17367	1.00303	117.28	129.285	10.8296
CREB3/XBP1	same	-7.5	85	88.4224	96.8973	9.84364	0.384122	0.466245	-0.347677	0.933858	94.6851	103.76	9.73063
CREB3/XBP1	opp	-6.5	154	137.117	151.297	12.3003	0.0709701	0.389342	1.37254	1.00303	136.703	150.84	11.692
CREB3/XBP1	same	-6.5	84	76.2508	83.531	9.13953	0.171776	0.411817	0.847881	0.933858	81.6514	89.4472	9.03611
CREB3/XBP1	opp	-5.5	122	111.382	122.301	11.059	0.14635	0.411817	0.960158	1.00303	111.045	121.932	10.5378
CREB3/XBP1	same	-5.5	74	74.6223	81.1248	9.00693	0.502061	0.50493	-0.0690922	0.933858	79.9076	86.8706	8.9391
CREB3/XBP1	same	-4.5	88	77.4777	85.2289	9.23195	0.106988	0.389562	1.13977	0.933858	82.9652	91.2654	9.10852
CREB3/XBP1	opp	-4.5	94	93.064	100.075	10.0037	0.434187	0.481437	0.0935601	1.00303	92.783	99.7728	9.63239
CREB3/XBP1	opp	-3.5	221	175.65	190.807	13.8133	0.000425804	0.0654971	3.28309	1.00303	175.119	190.23	13.2333
CREB3/XBP1	same	-3.5	48	51.0821	55.3062	7.43681	0.366624	0.461742	-0.414438	0.933858	54.7001	59.2234	7.39595
CREB3/XBP1	same	-2.5	62	70.0483	74.3589	8.62316	0.184453	0.411817	-0.933334	0.933858	75.0096	79.6255	8.66081
CREB3/XBP1	opp	-2.5	35	34.6123	37.407	6.11612	0.429146	0.481437	0.0633869	1.00303	34.5078	37.294	5.87433
CREB3/XBP1	same	-1.5	89	94.7352	105.9	10.2908	0.299573	0.459613	-0.55731	0.933858	101.445	113.401	10.072
CREB3/XBP1	opp	-1.5	34	32.4806	35.2031	5.93322	0.352047	0.461742	0.256085	1.00303	32.3825	35.0968	5.69056
CREB3/XBP1	same	-0.5	2	5.21269	5.40288	2.32441	0.107844	0.389562	-1.38215	0.933858	5.58189	5.78555	2.3626
CREB3/XBP1	opp	-0.5	206	205.736	224.064	14.9688	0.47415	0.490726	0.0176269	1.00303	205.115	223.388	14.3218
CREB3/XBP1	same	0.5	16	25.7253	26.3038	5.12873	0.0279029	0.245546	-1.89624	0.926797	27.6519	28.2737	5.2585
CREB3/XBP1	opp	0.5	18	13.2474	14.1754	3.76502	0.0801258	0.389562	1.26231	0.985027	13.327	14.2605	3.65061
CREB3/XBP1	opp	1.5	26	21.0868	23.07	4.80312	0.121372	0.389562	1.02291	0.985027	21.4074	23.4207	4.62681
CREB3/XBP1	same	1.5	9	7.80531	8.24806	2.87194	0.259532	0.457264	0.415987	0.926797	8.42181	8.89954	2.90204
CREB3/XBP1	opp	2.5	16	20.1638	22.9412	4.7897	0.210671	0.424625	-0.869328	0.985027	20.4703	23.2899	4.52441
CREB3/XBP1	same	2.5	6	8.32421	8.76174	2.96002	0.275398	0.457264	-0.785201	0.926797	8.9817	9.45378	2.99695
CREB3/XBP1	opp	3.5	12	7.8422	8.44976	2.90685	0.0565004	0.349832	1.43035	0.985027	7.96141	8.5782	2.8216
CREB3/XBP1	same	3.5	42	39.9978	42.3138	6.5049	0.338056	0.461742	0.307793	0.926797	43.1571	45.6559	6.5694
CREB3/XBP1	opp	4.5	204	243.106	262.199	16.1926	0.00561711	0.180185	-2.41506	0.985027	246.801	266.185	15.7099
CREB3/XBP1	same	4.5	8	7.48648	8.04671	2.83667	0.336178	0.461742	0.181027	0.926797	8.0778	8.68228	2.84215
CREB3/XBP1	opp	5.5	94	107.303	117.059	10.8194	0.106492	0.389562	-1.22955	0.985027	108.934	118.839	10.4371
CREB3/XBP1	same	5.5	33	30.7637	32.8772	5.73386	0.302927	0.459613	0.390011	0.926797	33.1936	35.474	5.76139
CREB3/XBP1	opp	6.5	57	85.2542	94.755	9.73422	0.000744285	0.0654971	-2.90256	0.985027	86.5501	96.1953	9.30323
CREB3/XBP1	same	6.5	103	75.6451	80.6649	8.98136	0.00114636	0.0672529	3.04574	0.926797	81.6199	87.0362	9.03438
CREB3/XBP1	opp	7.5	123	114.949	125.731	11.213	0.21088	0.424625	0.718036	0.985027	116.696	127.642	10.8026
CREB3/XBP1	same	7.5	84	81.1525	88.8161	9.42423	0.349198	0.461742	0.302149	0.926797	87.5623	95.8312	9.35747
CREB3/XBP1	opp	8.5	95	106.073	116.434	10.7904	0.151987	0.411817	-1.02623	0.985027	107.686	118.204	10.3772
CREB3/XBP1	same	8.5	108	110.422	122.153	11.0523	0.433469	0.481437	-0.219172	0.926797	119.144	131.802	10.9153
CREB3/XBP1	same	9.5	78	97.749	107.695	10.3776	0.0227909	0.222845	-1.90304	0.926797	105.47	116.201	10.2698
CREB3/XBP1	opp	9.5	102	117.237	129.613	11.3848	0.0844936	0.389562	-1.33841	0.985027	119.02	131.583	10.9096
CREB3/XBP1	same	10.5	65	86.2698	95.5278	9.77383	0.0102378	0.180185	-2.17619	0.926797	93.0838	103.073	9.64799
CREB3/XBP1	opp	10.5	134	121.395	133.325	11.5466	0.118242	0.389562	1.09167	0.985027	123.24	135.351	11.1014
CREB3/XBP1	opp	11.5	129	115.84	127.757	11.303	0.103735	0.389562	1.16426	0.985027	117.601	129.699	10.8444
CREB3/XBP1	same	11.5	90	85.3852	93.2678	9.65752	0.28569	0.459613	0.477847	0.926797	92.1293	100.635	9.5984
CREB3/XBP1	opp	12.5	107	116.594	128.369	11.33	0.201051	0.420293	-0.846787	0.985027	118.366	130.32	10.8796
CREB3/XBP1	same	12.5	79	84.405	92.3301	9.60885	0.301239	0.459613	-0.562498	0.926797	91.0717	99.6227	9.54315
CREB3/XBP1	same	13.5	96	88.1159	96.3917	9.81793	0.18485	0.411817	0.803032	0.926797	95.0757	104.005	9.75068
CREB3/XBP1	opp	13.5	118	120.231	132.795	11.5237	0.443141	0.481437	-0.193616	0.985027	122.059	134.813	11.048
CREB3/XBP1	opp	14.5	102	114.503	125.671	11.2103	0.130018	0.404154	-1.11528	0.985027	116.243	127.582	10.7816
CREB3/XBP1	same	14.5	96	88.4445	97.1311	9.85551	0.194479	0.41239	0.766624	0.926797	95.4303	104.803	9.76884
CREB3/XBP1	same	15.5	96	88.0964	96.6141	9.82925	0.184287	0.411817	0.804091	0.926797	95.0547	104.245	9.7496
CREB3/XBP1	opp	15.5	114	110.883	121.651	11.0295	0.36038	0.461742	0.282637	0.985027	112.568	123.5	10.6098
CREB3/XBP1	same	16.5	105	89.9204	98.3844	9.91889	0.0530724	0.347823	1.52029	0.926797	97.0228	106.155	9.85001
CREB3/XBP1	opp	16.5	112	108.887	119.676	10.9397	0.359326	0.461742	0.284568	0.985027	110.542	121.495	10.5139
CREB3/XBP1	same	17.5	86	95.8102	104.645	10.2296	0.171086	0.411817	-0.958998	0.926797	103.378	112.911	10.1675
CREB3/XBP1	opp	17.5	103	108.099	118.963	10.907	0.333817	0.461742	-0.467528	0.985027	109.743	120.772	10.4758
CREB3/XBP1	same	18.5	115	97.8441	107.499	10.3682	0.0399453	0.305668	1.65467	0.926797	105.572	115.99	10.2748
CREB3/XBP1	opp	18.5	105	106.266	117.01	10.8171	0.476785	0.490726	-0.117069	0.985027	107.882	118.788	10.3866
CREB3/XBP1	opp	19.5	96	109.473	120.257	10.9662	0.105755	0.389562	-1.22862	0.985027	111.137	122.085	10.5422
CREB3/XBP1	same	19.5	94	96.149	105.394	10.2662	0.439755	0.481437	-0.209333	0.926797	103.743	113.719	10.1854
CREB3/XBP1	same	20.5	75	97.7507	107.258	10.3565	0.00996676	0.180185	-2.19675	0.926797	105.471	115.729	10.2699
CREB3/XBP1	opp	20.5	109	110.028	120.865	10.9939	0.486266	0.496685	-0.0934824	0.985027	111.7	122.703	10.5688
CREB3/XBP1	same	21.5	111	99.5178	109.216	10.4506	0.116129	0.389562	1.09871	0.926797	107.378	117.842	10.3623
CREB3/XBP1	opp	21.5	97	101.447	110.89	10.5304	0.352811	0.461742	-0.422262	0.985027	102.989	112.576	10.1483
CREB3/XBP1	opp	22.5	120	104.188	113.99	10.6766	0.0576428	0.349832	1.48103	0.985027	105.771	115.723	10.2845
CREB3/XBP1	same	22.5	96	97.9603	107.793	10.3824	0.447884	0.483604	-0.188812	0.926797	105.698	116.307	10.2809
CREB3/XBP1	same	23.5	82	96.594	106.431	10.3166	0.0730017	0.389342	-1.41462	0.926797	104.224	114.838	10.209
CREB3/XBP1	opp	23.5	107	114.246	126.147	11.2315	0.26707	0.457264	-0.645107	0.985027	115.982	128.064	10.7695
CREB3/XBP1	opp	24.5	129	119.921	132.301	11.5022	0.189836	0.41239	0.789336	0.985027	121.744	134.312	11.0338
CREB3/XBP1	same	24.5	104	97.7367	107.356	10.3613	0.244114	0.442928	0.604489	0.926797	105.456	115.835	10.2692
CREB3/XBP1	opp	25.5	129	118.816	131.09	11.4495	0.163268	0.411817	0.88951	0.985027	120.622	133.083	10.9828
CREB3/XBP1	same	25.5	88	97.0682	106.449	10.3174	0.193312	0.41239	-0.878925	0.926797	104.735	114.857	10.234
CREB3/XBP1	opp	26.5	103	113.508	124.324	11.1501	0.17418	0.411817	-0.942391	0.985027	115.233	126.214	10.7347
CREB3/XBP1	same	26.5	99	94.5781	104.395	10.2174	0.301945	0.459613	0.432778	0.926797	102.048	112.641	10.1019
CREB3/XBP1	opp	27.5	139	113.029	124.368	11.152	0.007841	0.180185	2.32882	0.985027	114.747	126.258	10.712
CREB3/XBP1	same	27.5	92	90.951	99.8879	9.99439	0.428806	0.481437	0.10496	0.926797	98.1347	107.778	9.9063
CREB3/XBP1	same	28.5	87	96.5845	106.282	10.3093	0.178212	0.411817	-0.929691	0.926797	104.213	114.677	10.2085
CREB3/XBP1	opp	28.5	107	115.699	127.958	11.3119	0.224881	0.424782	-0.769003	0.985027	117.458	129.903	10.8378
CREB3/XBP1	same	29.5	84	97.6487	107.277	10.3574	0.0893147	0.389562	-1.31777	0.926797	105.361	115.75	10.2646
CREB3/XBP1	opp	29.5	123	118.725	130.441	11.4211	0.326172	0.461742	0.374269	0.985027	120.53	132.423	10.9786
CREB3/XBP1	opp	30.5	110	119.638	131.598	11.4716	0.202982	0.420293	-0.8402	0.985027	121.457	133.598	11.0208
CREB3/XBP1	same	30.5	102	95.1773	104.477	10.2214	0.22418	0.424782	0.667487	0.926797	102.695	112.729	10.1338
CREB3/XBP1	opp	31.5	120	124.103	137.121	11.7099	0.378295	0.465594	-0.35039	0.985027	125.989	139.205	11.2245
CREB3/XBP1	same	31.5	93	96.0505	105.187	10.2561	0.4035	0.467606	-0.297431	0.926797	103.637	113.495	10.1802
CREB3/XBP1	opp	32.5	100	116.357	127.527	11.2928	0.0681561	0.386951	-1.44849	0.985027	118.126	129.466	10.8686
CREB3/XBP1	same	32.5	101	95.5772	104.906	10.2423	0.268742	0.457264	0.529447	0.926797	103.126	113.192	10.1551
CREB3/XBP1	same	33.5	118	97.6605	107.528	10.3696	0.0198876	0.205895	1.96146	0.926797	105.374	116.021	10.2652
CREB3/XBP1	opp	33.5	104	115.353	126.667	11.2546	0.155959	0.411817	-1.00874	0.985027	117.106	128.592	10.8216
CREB3/XBP1	opp	34.5	107	120.401	132.523	11.5119	0.11855	0.389562	-1.16413	0.985027	122.232	134.537	11.0558
CREB3/XBP1	same	34.5	99	99.1717	109.167	10.4483	0.519816	0.519816	-0.0164361	0.926797	107.005	117.79	10.3443
CREB3/XBP1	opp	35.5	106	120.891	133.274	11.5444	0.0932943	0.389562	-1.28991	0.985027	122.729	135.3	11.0783
CREB3/XBP1	same	35.5	96	97.5389	107.004	10.3443	0.464757	0.486888	-0.148771	0.926797	105.243	115.456	10.2588
CREB3/XBP1	opp	36.5	108	118.914	130.926	11.4423	0.170068	0.411817	-0.953793	0.985027	120.721	132.916	10.9873
CREB3/XBP1	same	36.5	94	97.2442	106.574	10.3235	0.396429	0.467606	-0.314254	0.926797	104.925	114.992	10.2433
CREB3/XBP1	same	37.5	80	105.025	115.519	10.748	0.00657419	0.180185	-2.32838	0.926797	113.321	124.643	10.6452
CREB3/XBP1	opp	37.5	112	116.303	128.089	11.3176	0.367295	0.461742	-0.380198	0.985027	118.071	130.036	10.866
CREB3/XBP1	opp	38.5	102	116.574	128.781	11.3482	0.0941921	0.389562	-1.28426	0.985027	118.346	130.738	10.8787
CREB3/XBP1	same	38.5	97	99.604	109.626	10.4702	0.422778	0.481437	-0.24871	0.926797	107.471	118.285	10.3668
CREB3/XBP1	opp	39.5	128	123.406	136.725	11.693	0.31905	0.461742	0.392875	0.985027	125.282	138.804	11.1929
CREB3/XBP1	same	39.5	104	102.197	112.854	10.6233	0.403842	0.467606	0.169729	0.926797	110.269	121.768	10.5009
CREB3/XBP1	opp	40.5	142	115.504	127.339	11.2844	0.00739622	0.180185	2.34797	0.985027	117.26	129.274	10.8287
CREB3/XBP1	same	40.5	99	103.093	113.445	10.6511	0.367136	0.461742	-0.384303	0.926797	111.236	122.406	10.5469
CREB3/XBP1	opp	41.5	109	115.371	126.869	11.2636	0.296096	0.459613	-0.565629	0.985027	117.125	128.797	10.8224
CREB3/XBP1	same	41.5	102	106.337	117.817	10.8543	0.360129	0.461742	-0.399593	0.926797	114.736	127.123	10.7115
CREB3/XBP1	opp	42.5	114	120.119	132.621	11.5161	0.308036	0.461742	-0.531346	0.985027	121.945	134.637	11.0429
CREB3/XBP1	same	42.5	98	100.995	111.319	10.5508	0.408041	0.46938	-0.283828	0.926797	108.972	120.111	10.4389
CREB3/XBP1	same	43.5	130	107.344	118.898	10.9041	0.0147524	0.185459	2.07777	0.926797	115.822	128.29	10.7621
CREB3/XBP1	opp	43.5	117	121.067	133.787	11.5666	0.378075	0.465594	-0.351599	0.985027	122.907	135.821	11.0863
CREB3/XBP1	same	44.5	124	108.514	119.799	10.9453	0.0649276	0.380909	1.41482	0.926797	117.085	129.262	10.8206
CREB3/XBP1	opp	44.5	131	120.435	132.409	11.5069	0.15665	0.411817	0.918102	0.985027	122.266	134.422	11.0574
CTCF	same	-47.5	306	291.596	321.095	17.0762	0.190732	0.437295	0.843521	0.926846	314.611	346.438	17.7373
CTCF	opp	-47.5	273	305.915	336.894	17.4904	0.0302006	0.32108	-1.88188	0.946158	323.323	356.065	17.9812
CTCF	opp	-46.5	268	296.815	326.601	17.2283	0.0483668	0.345783	-1.67253	0.946158	313.705	345.186	17.7117
CTCF	same	-46.5	292	287.939	316.236	16.9688	0.390562	0.485919	0.239293	0.926846	310.666	341.195	17.6257
CTCF	same	-45.5	293	290.993	321.198	17.0585	0.437822	0.485919	0.117634	0.926846	313.961	346.55	17.7189
CTCF	opp	-45.5	284	299.56	329.946	17.3078	0.192733	0.437295	-0.899026	0.946158	316.607	348.722	17.7934
CTCF	opp	-44.5	295	319.077	352.647	17.8627	0.0922163	0.402854	-1.3479	0.946158	337.234	372.714	18.3639
CTCF	same	-44.5	277	291.628	321.191	17.0771	0.204886	0.437295	-0.856598	0.926846	314.646	346.542	17.7383
CTCF	opp	-43.5	330	316.246	349.517	17.7833	0.210427	0.437295	0.773427	0.946158	334.242	369.407	18.2823
CTCF	same	-43.5	288	285.935	315.026	16.9096	0.435931	0.485919	0.122104	0.926846	308.504	339.89	17.5643
CTCF	same	-42.5	295	281.073	309.433	16.7652	0.194021	0.437295	0.830698	0.926846	303.258	333.856	17.4143
CTCF	opp	-42.5	289	306.658	337.446	17.5116	0.163657	0.437295	-1.00835	0.946158	324.108	356.649	18.003
CTCF	same	-41.5	298	284.609	312.892	16.8703	0.204213	0.437295	0.793789	0.926846	307.072	337.588	17.5235
CTCF	opp	-41.5	286	303.812	334.382	17.4302	0.160303	0.437295	-1.0219	0.946158	321.1	353.41	17.9193
CTCF	same	-40.5	286	292.088	321.831	17.0906	0.375149	0.476604	-0.356239	0.926846	315.142	347.233	17.7522
CTCF	opp	-40.5	279	296.501	326.392	17.2192	0.161765	0.437295	-1.01638	0.946158	313.374	344.966	17.7024
CTCF	opp	-39.5	288	301.575	332.463	17.3659	0.226999	0.437295	-0.78169	0.946158	318.736	351.382	17.8532
CTCF	same	-39.5	320	296.144	326.301	17.2088	0.0798479	0.3751	1.38624	0.926846	319.518	352.056	17.8751
CTCF	same	-38.5	331	294.707	324.586	17.167	0.017414	0.240058	2.11413	0.926846	317.967	350.205	17.8316
CTCF	opp	-38.5	336	296.813	326.523	17.2283	0.0117752	0.216235	2.27456	0.946158	313.704	345.104	17.7117
CTCF	same	-37.5	261	292.829	323.475	17.1122	0.0317958	0.321137	-1.85999	0.926846	315.941	349.006	17.7747
CTCF	opp	-37.5	291	299.669	329.199	17.311	0.321184	0.465459	-0.500782	0.946158	316.722	347.932	17.7967
CTCF	same	-36.5	264	289.251	318.568	17.0074	0.0712045	0.361763	-1.4847	0.926846	312.081	343.712	17.6658
CTCF	opp	-36.5	301	295.484	324.975	17.1897	0.360005	0.474818	0.320868	0.946158	312.299	343.468	17.672
CTCF	opp	-35.5	298	302.107	332.836	17.3812	0.421398	0.485919	-0.236281	0.946158	319.298	351.777	17.8689
CTCF	same	-35.5	280	287.669	316.753	16.9608	0.339218	0.472218	-0.452177	0.926846	310.374	341.754	17.6174
CTCF	same	-34.5	295	288.249	318.702	16.9779	0.331746	0.470362	0.397639	0.926846	311	343.856	17.6352
[truncated: 33,177 more rows]

## Sheet: 3_64PP_formation_cellDNA
TF_cluster	strand	position	observed_count	predicted_count	predicted_var	predicted_std_dev	pval	qval	zscore	scaling_factor	predicted_count_raw	predicted_var_raw	predicted_std_dev_raw
[truncated: 31,748 more rows]

[truncated: 2 more sheets: 4_64PP_formation_nakedDNA, 5_CPD_repair_6hr]
