# Supplementary material for: High-throughput characterization of transcription factors that modulate UVdamage formation and repair at single-nucleotide resolution
Source: Research Square preprint supplement (doi:10.21203/rs.3.rs-8197218/v1), 2025-12-10
Supplement: Supplementary file 5 [file 8dfbc4569e37be318aba6a06.xlsx]

## Sheet: TOC
Supplementary data on the rates of damage formation and damage repair referenced in the paper, "High-throughput characterization of transcription factors that modulate UV damage formation and repair at single-nucleotide resolution", Wasserman et al. All metrics are calculated from intergenic, open chromatin regions.
Table of Contents
#	Dataset	Cellular context	Assay	Experimental conditions		GEOS accession		Analysis Description
				Irradiation (UVC)	Repair time (hr)	Series	Sample
1	CPD_cellDNA_6mer	Human skin fibroblast (C1SAN/CSB^WT)	CPD-seq v2.0	6 J/m2	0	GSE235483	GSM7503613	CPD formation fraction per NNYYNN sequence from CPD-seq v2.0 experiments of UV irradiated cellular DNA
2	CPD_nakedDNA_6mer	Naked, protein purified	CPD-seq v2.0	12 J/m2	0	GSE235483	GSM7503618	CPD formation fraction per NNYYNN sequence from CPD-seq v2.0 experiments of UV irradiated naked DNA
3	64PP_cellDNA_6mer	Human skin fibroblast (NHF1)	UVDE-seq	500 J/m2	0	GSE297236	GSM8986610	6-4 PP formation fraction per NNYYNN sequence from UVDE-seq experiments of UV irradiated cellular DNA (rep1 only, no reseq)
4	64PP_nakedDNA_6mer	Naked, protein purified	UVDE-seq	400 J/m2	0	GSE297236	GSM8986612	6-4 PP formation fraction per NNYYNN sequence from UVDE-seq experiments of UV irradiated naked DNA
5	CPD_6hr_24hr_repair_4mer	Human skin fibroblast (C1SAN/CSB^WT)	CPD-seq v2.0	6 J/m2	6	GSE235483	GSM7503614	Fraction of CPDs repaired per NYYN sequence from CPD-seq v2.0 experiments of UV irradiated cellular DNA after 6hr of repair time
		Human skin fibroblast (C1SAN/CSB^WT)	CPD-seq v2.0	6 J/m2	24	GSE235483	GSM7503615	Fraction of CPDs repaired per NYYN sequence from CPD-seq v2.0 experiments of UV irradiated cellular DNA after 24hr of repair time
Column Name		Content
seq		Dipyrimdine-centered hexanucleotide or tetranucleotide sequence
kmer_count		Number of occurences of the given sequence in the region of interest
damage_count		Number of damages at the given sequence in the region of interest
mean		Damage formation frequency fraction for the given sequence (damage_count/kmer_count, i.e. mean)
var		Variance of the damage formation for the given sequence
frac_repaired_[X]hr		Fraction of damage repaired at Xhrs after initial irradiation

## Sheet: 1_CPD_cellDNA_6mer
seq	kmer_count	damage_count	mean	var
AACCAA	2503	45	0.0179784	0.0176623
AACTAA	1143	21	0.0183727	0.0180509
AATCAA	1425	38	0.0266667	0.0259738
AATTAA	787	44	0.0559085	0.0553944
AACCAC	3988	93	0.02332	0.0227819
AACTAC	1488	22	0.0147849	0.0145761
AATCAC	2900	80	0.0275862	0.0289041
AATTAC	1188	48	0.040404	0.0421741
AACCAT	1803	62	0.0343871	0.0354428
AACTAT	1232	29	0.023539	0.0230036
AATCAT	2829	84	0.0296925	0.0295282
AATTAT	1011	48	0.0474777	0.0472486
AACCAG	3262	66	0.020233	0.020443
AACTAG	1161	27	0.0232558	0.0227346
AATCAG	3360	87	0.0258929	0.0252299
AATTAG	989	32	0.0323559	0.0313407
AACCCA	2733	54	0.0197585	0.0193752
AACTCA	2633	44	0.016711	0.016438
AATCCA	2179	46	0.0211106	0.0215927
AATTCA	1984	74	0.0372984	0.0379425
AACCCC	2543	56	0.0220212	0.0215448
AACTCC	2902	47	0.0161957	0.0166283
AATCCC	2883	88	0.0305238	0.0309903
AATTCC	3660	118	0.0322404	0.0344891
AACCCT	2578	59	0.022886	0.0223709
AACTCT	2479	32	0.0129084	0.013554
AATCCT	2521	78	0.0309401	0.0307884
AATTCT	2595	87	0.033526	0.0362696
AACCCG	1370	22	0.0160584	0.0158121
AACTCG	687	6	0.00873362	0.00866997
AATCCG	741	10	0.0134953	0.0133311
AATTCG	352	10	0.0284091	0.0333787
AACCTA	1076	23	0.0213755	0.020938
AACTTA	1019	19	0.0186457	0.018316
AATCTA	995	25	0.0251256	0.024519
AATTTA	1285	45	0.0350195	0.035377
AACCTC	2700	63	0.0233333	0.0235383
AACTTC	2265	33	0.0145695	0.015247
AATCTC	1997	62	0.0310466	0.0331038
AATTTC	2092	66	0.0315488	0.032481
AACCTT	1487	35	0.0235373	0.0229988
AACTTT	1611	25	0.0155183	0.015287
AATCTT	1593	44	0.0276208	0.0318999
AATTTT	1782	46	0.0258137	0.0262844
AACCTG	2202	28	0.0127157	0.0134684
AACTTG	1792	28	0.015625	0.0176228
AATCTG	2515	60	0.0238569	0.0248881
AATTTG	1708	52	0.030445	0.0318787
AACCGA	602	9	0.0149502	0.0147512
AACTGA	2545	35	0.0137525	0.0135687
AATCGA	290	4	0.0137931	0.0136499
AATTGA	1011	22	0.0217606	0.0213082
AACCGC	1303	13	0.00997698	0.00988502
AACTGC	3046	33	0.0108339	0.01072
AATCGC	700	7	0.01	0.00991416
AATTGC	1515	38	0.0250825	0.0244695
AACCGT	572	11	0.0192308	0.018894
AACTGT	2350	35	0.0148936	0.014678
AATCGT	350	8	0.0228571	0.0223987
AATTGT	1291	44	0.0340821	0.0344964
AACCGG	1150	17	0.0147826	0.0145768
AACTGG	2854	33	0.0115627	0.011433
AATCGG	647	9	0.0139104	0.0137381
AATTGG	1377	74	0.05374	0.0785053
ACCCAA	2283	67	0.0293473	0.0302514
ACCTAA	1004	25	0.0249004	0.0243046
ACTCAA	2632	97	0.0368541	0.0370297
ACTTAA	1307	65	0.0497322	0.0503579
ACCCAC	3614	108	0.0298838	0.031213
ACCTAC	1219	22	0.0180476	0.0177364
ACTCAC	6357	237	0.0372817	0.0384148
ACTTAC	1235	50	0.0404858	0.040499
ACCCAT	1932	64	0.0331263	0.0351527
ACCTAT	737	16	0.0217096	0.0212672
ACTCAT	6149	264	0.0429338	0.0446756
ACTTAT	1022	50	0.0489237	0.0524523
ACCCAG	5778	119	0.0205954	0.0212133
ACCTAG	1658	38	0.0229192	0.0224074
ACTCAG	7716	259	0.0335666	0.0342587
ACTTAG	1698	101	0.0594817	0.0571552
ACCCCA	3664	72	0.0196507	0.0209078
ACCTCA	3249	60	0.0184672	0.0193633
ACTCCA	3832	149	0.0388831	0.0394692
ACTTCA	2458	96	0.0390561	0.039988
ACCCCC	3113	67	0.0215226	0.0223515
ACCTCC	4377	61	0.0139365	0.0142024
ACTCCC	4400	170	0.0386364	0.0403346
ACTTCC	5889	217	0.0368484	0.0368553
ACCCCT	3103	87	0.0280374	0.0272601
ACCTCT	3149	43	0.0136551	0.0134729
ACTCCT	3727	151	0.0405152	0.0394209
ACTTCT	2828	99	0.0350071	0.0380383
ACCCCG	2490	28	0.011245	0.0119265
ACCTCG	1231	18	0.0146223	0.0144202
ACTCCG	1681	53	0.0315289	0.0317434
ACTTCG	654	13	0.0198777	0.0195124
ACCCTA	1377	34	0.0246914	0.0270062
ACCTTA	842	17	0.02019	0.022184
ACTCTA	1497	68	0.0454242	0.0460636
ACTTTA	1358	80	0.0589102	0.0672713
ACCCTC	3478	101	0.0290397	0.0282045
ACCTTC	1969	48	0.0243779	0.0237957
ACTCTC	3060	151	0.0493464	0.0501957
ACTTTC	2343	73	0.0311566	0.0310528
ACCCTT	2007	72	0.0358744	0.0475658
ACCTTT	1295	30	0.023166	0.0226468
ACTCTT	2391	126	0.0526976	0.0633306
ACTTTT	1846	70	0.0379198	0.0386697
ACCCTG	4536	94	0.0207231	0.0211802
ACCTTG	1892	34	0.0179704	0.0187144
ACTCTG	4800	194	0.0404167	0.0417085
ACTTTG	2312	82	0.0354671	0.0350894
ACCCGA	965	9	0.00932642	0.0133984
ACCTGA	1685	14	0.00830861	0.00824447
ACTCGA	485	6	0.0123711	0.0122433
ACTTGA	1887	58	0.0307366	0.0298077
ACCCGC	2422	28	0.0115607	0.0122579
ACCTGC	2821	28	0.00992556	0.0105397
ACTCGC	1284	28	0.0218069	0.0213479
ACTTGC	2099	69	0.0328728	0.0327606
ACCCGT	747	8	0.0107095	0.010609
ACCTGT	1327	14	0.0105501	0.0104467
ACTCGT	512	16	0.03125	0.0420744
ACTTGT	1687	56	0.033195	0.0332984
ACCCGG	2661	39	0.0146561	0.0144468
ACCTGG	2896	40	0.0138122	0.0143169
ACTCGG	1425	24	0.0168421	0.0179746
ACTTGG	2878	66	0.0229326	0.0231096
ATCCAA	1746	65	0.0372279	0.039301
ATCTAA	1054	27	0.0256167	0.0268835
ATTCAA	1850	106	0.0572973	0.0594519
ATTTAA	1518	110	0.0724638	0.0843962
ATCCAC	2210	66	0.0298643	0.0307963
ATCTAC	1137	34	0.0299033	0.0290346
ATTCAC	2711	138	0.0509037	0.0498064
ATTTAC	1401	117	0.0835118	0.0880208
ATCCAT	1748	85	0.048627	0.052013
ATCTAT	973	25	0.0256937	0.0250593
ATTCAT	3542	184	0.0519481	0.0520874
ATTTAT	1897	149	0.0785451	0.0776882
ATCCAG	3171	94	0.0296436	0.028774
ATCTAG	1458	46	0.0315501	0.0346937
ATTCAG	3251	145	0.0446017	0.045087
ATTTAG	1334	99	0.0742129	0.0792595
ATCCCA	3513	79	0.0224879	0.0225579
ATCTCA	2817	53	0.0188143	0.0198874
ATTCCA	4858	181	0.0372581	0.0379362
ATTTCA	2957	139	0.0470071	0.0475189
ATCCCC	2810	86	0.030605	0.0296789
ATCTCC	2876	62	0.0215577	0.021796
ATTCCC	3301	166	0.0502878	0.0501976
ATTTCC	4461	258	0.0578346	0.0589863
ATCCCT	3250	89	0.0273846	0.027874
ATCTCT	3043	62	0.0203746	0.0206235
ATTCCT	5154	252	0.0488941	0.0511699
ATTTCT	3437	193	0.0561536	0.0576724
ATCCCG	1366	28	0.0204978	0.0215576
ATCTCG	689	17	0.0246734	0.0240996
ATTCCG	846	35	0.0413712	0.0397065
ATTTCG	392	20	0.0510204	0.0587713
ATCCTA	1459	39	0.0267306	0.0274057
ATCTTA	1198	38	0.0317195	0.0324099
ATTCTA	1579	67	0.0424319	0.0406572
ATTTTA	1860	89	0.0478495	0.0488119
ATCCTC	3188	122	0.0382685	0.0380707
ATCTTC	1984	59	0.0297379	0.0298767
ATTCTC	2819	130	0.0461156	0.0475532
ATTTTC	2330	113	0.0484979	0.0496006
ATCCTT	2388	99	0.0414573	0.0422688
ATCTTT	2017	48	0.0237977	0.024235
ATTCTT	3245	153	0.0471495	0.0523385
ATTTTT	3016	119	0.0394562	0.0392387
ATCCTG	4145	121	0.0291918	0.0297944
ATCTTG	2194	59	0.0268915	0.0270923
ATTCTG	3305	104	0.0314675	0.0323025
ATTTTG	2032	150	0.0738189	0.0841591
ATCCGA	524	7	0.0133588	0.0132055
ATCTGA	2816	49	0.0174006	0.0178143
ATTCGA	279	9	0.0322581	0.0313298
ATTTGA	1758	73	0.0415245	0.044376
ATCCGC	1019	21	0.0206084	0.0202036
ATCTGC	3024	53	0.0175265	0.017225
ATTCGC	500	17	0.034	0.0369178
ATTTGC	2103	115	0.0546838	0.0593299
ATCCGT	539	25	0.0463822	0.0443131
ATCTGT	2603	55	0.0211295	0.020691
ATTCGT	375	11	0.0293333	0.028549
ATTTGT	2180	101	0.0463303	0.0478755
ATCCGG	1260	41	0.0325397	0.034683
ATCTGG	3129	70	0.0223714	0.0225173
ATTCGG	506	15	0.0296443	0.0288224
ATTTGG	1990	72	0.0361809	0.0389115
AGCCAA	4949	65	0.013134	0.0133683
AGCTAA	1761	28	0.0159001	0.0156561
AGTCAA	2445	43	0.0175869	0.0172847
AGTTAA	1290	40	0.0310078	0.0300696
AGCCAC	5574	76	0.0136347	0.014169
AGCTAC	1910	27	0.0141361	0.0139436
AGTCAC	7045	84	0.0119233	0.0126346
AGTTAC	1392	37	0.0265805	0.0273304
AGCCAT	3273	63	0.0192484	0.0225511
AGCTAT	1845	25	0.0135501	0.0133738
AGTCAT	7425	99	0.0133333	0.0134267
AGTTAT	1379	45	0.0326323	0.0330418
AGCCAG	8055	122	0.0151459	0.0161599
AGCTAG	2185	18	0.00823799	0.00817386
AGTCAG	7104	99	0.0139358	0.0137435
AGTTAG	1424	27	0.0189607	0.0200197
AGCCCA	6104	74	0.0121232	0.0129613
AGCTCA	4905	44	0.00897044	0.00929961
AGTCCA	3025	37	0.0122314	0.0127472
AGTTCA	2160	38	0.0175926	0.0172911
AGCCCC	6865	71	0.0103423	0.0105282
AGCTCC	6515	64	0.00982348	0.0100355
AGTCCC	4050	58	0.014321	0.0151073
AGTTCC	3255	67	0.0205837	0.0226247
AGCCCT	6256	83	0.0132673	0.0137328
AGCTCT	5252	68	0.0129474	0.0131631
AGTCCT	3580	55	0.0153631	0.0151313
AGTTCT	2849	74	0.025974	0.0253083
AGCCCG	3872	27	0.00697314	0.0069263
AGCTCG	1540	15	0.00974026	0.00965165
AGTCCG	1269	15	0.0118203	0.0116898
AGTTCG	559	7	0.0125224	0.0123877
AGCCTA	2200	18	0.00818182	0.0108471
AGCTTA	1584	37	0.0233586	0.0253542
AGTCTA	1433	24	0.0167481	0.0178757
AGTTTA	1501	43	0.0286476	0.0291788
AGCCTC	6841	114	0.0166642	0.0163889
AGCTTC	4023	58	0.0144171	0.0152073
AGTCTC	3438	57	0.0165794	0.0168912
AGTTTC	2699	51	0.0188959	0.0185457
AGCCTT	4049	86	0.0212398	0.021782
AGCTTT	2905	61	0.0209983	0.0205644
AGTCTT	2438	40	0.0164069	0.0161443
AGTTTT	2117	55	0.0259802	0.0253172
AGCCTG	8318	112	0.0134648	0.013766
AGCTTG	3188	46	0.0144291	0.0142254
AGTCTG	3930	62	0.0157761	0.0155311
AGTTTG	2139	40	0.0187003	0.0183592
AGCCGA	1864	16	0.00858369	0.00851458
AGCTGA	5699	52	0.00912441	0.00904274
AGTCGA	455	4	0.00879121	0.00873312
AGTTGA	1754	29	0.0165336	0.0162696
AGCCGC	4451	23	0.00516738	0.00514183
AGCTGC	7112	59	0.00829584	0.00822817
AGTCGC	1063	8	0.00752587	0.00747626
AGTTGC	2236	30	0.0134168	0.0132427
AGCCGT	1268	9	0.00709779	0.00705298
AGCTGT	4952	48	0.00969305	0.00960104
AGTCGT	609	8	0.0131363	0.012985
AGTTGT	1983	35	0.01765	0.0183563
AGCCGG	4171	18	0.00431551	0.00429792
AGCTGG	7834	86	0.0109778	0.0113693
AGTCGG	1266	6	0.00473934	0.0047206
AGTTGG	2410	38	0.0157676	0.0163557
CACCAA	2953	79	0.0267525	0.0287556
CACTAA	1551	42	0.0270793	0.026363
CATCAA	1745	75	0.0429799	0.0445966
CATTAA	1308	85	0.0649847	0.0669291
CACCAC	5197	151	0.0290552	0.0289863
CACTAC	1612	39	0.0241935	0.0248643
CATCAC	3626	128	0.0353006	0.035719
CATTAC	1745	103	0.0590258	0.059014
CACCAT	3109	136	0.043744	0.0457049
CACTAT	1440	51	0.0354167	0.0355759
CATCAT	3077	144	0.0467988	0.0478742
CATTAT	1370	105	0.0766423	0.0766637
CACCAG	6202	299	0.0482103	0.0513764
CACTAG	3058	64	0.0209287	0.0218059
CATCAG	3833	125	0.0326115	0.0357316
CATTAG	1713	107	0.0624635	0.0656054
CACCCA	5806	132	0.0227351	0.0225666
CACTCA	4590	108	0.0235294	0.0229808
CATCCA	3505	108	0.0308131	0.0310138
CATTCA	3456	153	0.0442708	0.042902
CACCCC	6252	131	0.0209533	0.0214774
CACTCC	5035	103	0.0204568	0.0208369
CATCCC	4574	168	0.0367293	0.0380121
CATTCC	6274	251	0.0400064	0.0403249
CACCCT	5286	162	0.030647	0.0300918
CACTCT	4273	114	0.0266791	0.0259734
CATCCT	4964	199	0.0400886	0.0405042
CATTCT	4527	219	0.0483764	0.0486977
CACCCG	2546	41	0.0161037	0.0158506
CACTCG	1275	23	0.0180392	0.0177277
CATCCG	1284	35	0.0272586	0.0265362
CATTCG	589	27	0.0458404	0.0438135
CACCTA	1736	65	0.0374424	0.037214
CACTTA	1840	59	0.0320652	0.033229
CATCTA	2010	74	0.0368159	0.0394602
CATTTA	1978	112	0.0566229	0.0574903
CACCTC	4593	105	0.0228609	0.0240853
CACTTC	4989	106	0.0212467	0.0216014
CATCTC	4154	140	0.0337025	0.0340192
CATTTC	4649	221	0.0475371	0.0491597
CACCTT	1954	84	0.0429887	0.0503784
CACTTT	2787	55	0.0197345	0.019352
CATCTT	3217	143	0.0444514	0.0449762
CATTTT	3351	155	0.0462548	0.0465166
CACCTG	2822	56	0.0198441	0.0201662
CACTTG	2860	63	0.022028	0.0229494
CATCTG	4885	137	0.028045	0.0301306
CATTTG	2724	123	0.0451542	0.0482725
CACCGA	1080	16	0.0148148	0.0146089
CACTGA	4886	75	0.01535	0.0151175
CATCGA	410	6	0.0146341	0.0144552
CATTGA	1723	64	0.0371445	0.0357856
CACCGC	3662	43	0.0117422	0.0121538
CACTGC	6756	108	0.0159858	0.0163247
CATCGC	1108	28	0.0252708	0.0246544
CATTGC	2978	107	0.0359302	0.0359944
CACCGT	1261	25	0.0198255	0.0194479
CACTGT	4734	105	0.02218	0.0238054
CATCGT	688	22	0.0319767	0.0309993
CATTGT	2524	98	0.0388273	0.0428834
CACCGG	1986	12	0.0060423	0.00600881
CACTGG	5917	91	0.0153794	0.0151454
CATCGG	705	9	0.012766	0.0154618
CATTGG	3480	452	0.129885	0.164786
CCCCAA	3404	153	0.0449471	0.0470535
CCCTAA	1701	59	0.0346855	0.0335021
CCTCAA	2652	201	0.0757919	0.0768638
CCTTAA	1541	184	0.119403	0.123396
CCCCAC	6947	262	0.0377141	0.0388884
CCCTAC	2215	74	0.0334086	0.0359204
CCTCAC	4573	308	0.0673518	0.0689536
CCTTAC	1489	153	0.102754	0.101666
CCCCAT	3379	147	0.043504	0.043992
CCCTAT	1462	68	0.0465116	0.0484854
CCTCAT	3584	315	0.0878906	0.0913521
CCTTAT	1396	185	0.132521	0.132246
CCCCAG	8973	280	0.0312047	0.0315719
CCCTAG	3389	117	0.0345235	0.0345221
CCTCAG	7070	417	0.0589816	0.0625838
CCTTAG	2272	228	0.100352	0.105293
CCCCCA	5408	148	0.0273669	0.0277325
CCCTCA	4598	129	0.0280557	0.0290148
CCTCCA	7013	381	0.0543277	0.0553767
CCTTCA	3298	277	0.0839903	0.0848452
CCCCCC	3393	85	0.0250516	0.0256104
CCCTCC	11976	291	0.0242986	0.0240442
CCTCCC	14606	772	0.052855	0.0551315
CCTTCC	7853	634	0.0807335	0.0844135
CCCCCT	6719	169	0.0251526	0.025119
CCCTCT	8394	232	0.0276388	0.0278313
CCTCCT	10572	681	0.0644154	0.0680289
CCTTCT	4990	422	0.0845691	0.0922653
CCCCCG	4966	74	0.0149013	0.0150851
CCCTCG	3180	64	0.0201258	0.0209852
CCTCCG	4601	190	0.0412954	0.0426421
CCTTCG	1397	67	0.0479599	0.0571538
CCCCTA	2680	108	0.0402985	0.0409286
CCCTTA	1797	70	0.0389538	0.0385708
CCTCTA	3392	223	0.0657429	0.0702859
CCTTTA	1946	212	0.108941	0.108434
CCCCTC	8264	305	0.0369071	0.0384538
CCCTTC	5543	178	0.0321126	0.0321696
CCTCTC	7509	509	0.0677853	0.0687929
CCTTTC	4313	429	0.0994667	0.103972
CCCCTT	4454	305	0.0684778	0.0916493
CCCTTT	3802	152	0.039979	0.0436525
CCTCTT	4846	476	0.0982253	0.109648
CCTTTT	2932	284	0.0968622	0.114804
CCCCTG	7512	225	0.0299521	0.0303902
CCCTTG	3788	120	0.031679	0.0322679
CCTCTG	9654	517	0.0535529	0.0560772
CCTTTG	3667	295	0.0804472	0.0892712
CCCCGA	2206	38	0.0172257	0.0178437
CCCTGA	5479	113	0.0206242	0.0205676
CCTCGA	963	41	0.0425753	0.047042
CCTTGA	2628	166	0.0631659	0.0614825
CCCCGC	13028	154	0.0118207	0.0119889
CCCTGC	9710	208	0.0214212	0.0219945
CCTCGC	3853	123	0.0319232	0.032989
CCTTGC	3706	221	0.059633	0.0614902
CCCCGT	2006	54	0.0269192	0.0282027
CCCTGT	4692	118	0.0251492	0.0275064
CCTCGT	1364	68	0.0498534	0.0488701
CCTTGT	2804	202	0.0720399	0.0761498
CCCCGG	5767	101	0.0175134	0.0172097
CCCTGG	9661	175	0.0181141	0.0182019
CCTCGG	3587	113	0.0315026	0.0321919
CCTTGG	4827	253	0.0524135	0.0550641
CTCCAA	3580	152	0.0424581	0.0423432
CTCTAA	1898	83	0.0437302	0.0428942
CTTCAA	2029	162	0.0798423	0.0813933
CTTTAA	1950	224	0.114872	0.118147
CTCCAC	5650	213	0.0376991	0.0401788
CTCTAC	2125	78	0.0367059	0.0382001
CTTCAC	2790	176	0.0630824	0.0662953
CTTTAC	1491	161	0.107981	0.111151
CTCCAT	3595	189	0.052573	0.0537183
CTCTAT	1746	89	0.0509737	0.0621566
CTTCAT	2540	263	0.103543	0.114127
CTTTAT	1739	215	0.123634	0.124522
CTCCAG	9107	312	0.0342594	0.0346267
CTCTAG	3627	158	0.0435622	0.0438823
CTTCAG	4380	311	0.0710046	0.074199
CTTTAG	1769	219	0.123799	0.135683
CTCCCA	8336	238	0.0285509	0.0291788
CTCTCA	4394	123	0.0279927	0.0276706
CTTCCA	4792	304	0.0634391	0.0661061
CTTTCA	2953	200	0.0677277	0.0679046
CTCCCC	9786	312	0.0318823	0.0333217
CTCTCC	7993	204	0.0255223	0.0261253
CTTCCC	8058	529	0.065649	0.0673044
CTTTCC	5439	448	0.0823681	0.0866309
CTCCCT	9879	414	0.0419071	0.0421796
CTCTCT	7235	201	0.0277816	0.0283959
CTTCCT	9068	893	0.0984782	0.10776
CTTTCT	4671	360	0.0770713	0.0814249
CTCCCG	5604	111	0.0198073	0.0204893
CTCTCG	2068	40	0.0193424	0.019945
CTTCCG	4348	456	0.104876	0.115523
CTTTCG	810	52	0.0641975	0.067567
CTCCTA	2756	110	0.0399129	0.0390597
CTCTTA	2095	89	0.0424821	0.0435621
CTTCTA	1863	123	0.0660225	0.064919
CTTTTA	1722	143	0.083043	0.085488
CTCCTC	10211	363	0.0355499	0.0370319
CTCTTC	5080	149	0.0293307	0.0292636
CTTCTC	5128	346	0.0674727	0.069564
CTTTTC	3402	267	0.0784832	0.0794016
CTCCTT	5332	288	0.0540135	0.0619854
CTCTTT	3681	123	0.0334148	0.034481
CTTCTT	3312	291	0.0878623	0.095872
CTTTTT	2712	190	0.070059	0.0725521
CTCCTG	8477	264	0.0311431	0.0325364
CTCTTG	3793	121	0.0319009	0.0330011
CTTCTG	5871	358	0.0609777	0.0623799
CTTTTG	2484	187	0.0752818	0.0793082
CTCCGA	1591	30	0.0188561	0.0185121
CTCTGA	6333	144	0.022738	0.0231721
CTTCGA	487	19	0.0390144	0.0416846
CTTTGA	2468	152	0.0615883	0.0643042
CTCCGC	6398	107	0.016724	0.0170721
CTCTGC	9068	203	0.0223864	0.0225494
CTTCGC	1513	49	0.032386	0.0340034
CTTTGC	3592	239	0.0665367	0.0688103
CTCCGT	1653	38	0.0229885	0.0248949
CTCTGT	5929	137	0.0231068	0.0232514
CTTCGT	759	37	0.0487484	0.0543487
CTTTGT	3029	232	0.0765929	0.0872624
CTCCGG	4059	73	0.0179847	0.0186513
CTCTGG	8636	141	0.016327	0.0162939
CTTCGG	1393	39	0.0279971	0.0315432
CTTTGG	3651	188	0.0514927	0.0532382
CGCCAA	1349	19	0.0140845	0.0138964
CGCTAA	538	11	0.0204461	0.0237897
CGTCAA	582	5	0.00859107	0.00853192
CGTTAA	311	16	0.0514469	0.0683124
CGCCAC	3178	49	0.0154185	0.0164446
CGCTAC	780	11	0.0141026	0.0139215
CGTCAC	2413	18	0.00745959	0.00740702
CGTTAC	478	21	0.0439331	0.042091
CGCCAT	1638	25	0.0152625	0.0162605
CGCTAT	484	10	0.0206612	0.0202762
CGTCAT	1314	19	0.0144597	0.0157847
CGTTAT	341	14	0.0410557	0.0394859
CGCCAG	3729	47	0.0126039	0.0135214
CGCTAG	1228	14	0.0114007	0.0112799
CGTCAG	1873	19	0.0101442	0.0100466
CGTTAG	516	8	0.0155039	0.0152931
CGCCCA	4565	32	0.00700986	0.00696224
CGCTCA	1928	15	0.00778008	0.00876144
CGTCCA	1277	11	0.00861394	0.00854643
CGTTCA	641	14	0.0218409	0.0213972
CGCCCC	13198	98	0.00742537	0.00752234
CGCTCC	4751	55	0.0115765	0.0114449
CGTCCC	2633	31	0.0117736	0.0116394
CGTTCC	1500	28	0.0186667	0.0183304
CGCCCT	5448	70	0.0128488	0.0130532
CGCTCT	2864	24	0.00837989	0.00831257
CGTCCT	1789	21	0.0117384	0.0116071
CGTTCT	1008	24	0.0238095	0.0232657
CGCCCG	5961	44	0.00738131	0.00766363
CGCTCG	2304	15	0.00651042	0.00647084
CGTCCG	1478	10	0.0067659	0.00672467
CGTTCG	454	4	0.00881057	0.00875222
CGCCTA	1150	16	0.013913	0.0137314
CGCTTA	564	13	0.0230496	0.0261108
CGTCTA	496	7	0.0141129	0.0179822
CGTTTA	408	13	0.0318627	0.0309233
CGCCTC	6144	74	0.0120443	0.0122267
CGCTTC	2366	29	0.012257	0.0121119
CGTCTC	1827	30	0.0164204	0.0161596
CGTTTC	1199	20	0.0166806	0.016416
CGCCTT	2324	41	0.017642	0.0199211
CGCTTT	1209	26	0.0215054	0.0210603
CGTCTT	962	19	0.0197505	0.0235429
CGTTTT	751	17	0.0226365	0.0221536
CGCCTG	4668	46	0.00985433	0.00975931
CGCTTG	1294	10	0.00772798	0.00767418
CGTCTG	1808	25	0.0138274	0.0136438
CGTTTG	795	21	0.0264151	0.0257497
CGCCGA	1788	13	0.00727069	0.00722187
CGCTGA	2291	12	0.00523789	0.00521273
CGTCGA	320	0	0	0
CGTTGA	560	8	0.0142857	0.0141068
CGCCGC	8584	50	0.00582479	0.00579154
CGCTGC	4720	22	0.00466102	0.00464027
CGTCGC	1448	12	0.00828729	0.00822429
CGTTGC	1142	19	0.0166375	0.016375
CGCCGT	1623	22	0.0135551	0.0133796
CGCTGT	2344	28	0.0119454	0.0118077
CGTCGT	471	3	0.00636943	0.00634232
CGTTGT	598	15	0.0250836	0.0244954
CGCCGG	5127	29	0.00565633	0.00562543
CGCTGG	3916	25	0.00638407	0.00634493
CGTCGG	1130	12	0.0106195	0.0122875
CGTTGG	995	12	0.0120603	0.0119268
TACCAA	1299	46	0.0354119	0.0341842
TACTAA	1008	27	0.0267857	0.0260941
TATCAA	700	34	0.0485714	0.0491396
TATTAA	1004	60	0.059761	0.0582396
TACCAC	2014	51	0.0253227	0.0266808
TACTAC	881	24	0.0272418	0.0265298
TATCAC	1075	55	0.0511628	0.0504526
TATTAC	1112	78	0.0701439	0.070683
TACCAT	1524	48	0.0314961	0.0305241
TACTAT	952	34	0.0357143	0.034475
TATCAT	1034	52	0.0502901	0.0497434
TATTAT	1145	76	0.0663755	0.0725135
TACCAG	2104	65	0.0308935	0.0347085
TACTAG	887	23	0.0259301	0.0275436
TATCAG	1251	40	0.0319744	0.0309768
TATTAG	1098	52	0.0473588	0.0469803
TACCCA	2103	36	0.0171184	0.0177848
TACTCA	3320	56	0.0168675	0.016588
TATCCA	1475	40	0.0271186	0.027758
TATTCA	2000	75	0.0375	0.0371123
TACCCC	1350	28	0.0207407	0.0203256
TACTCC	1773	36	0.0203046	0.0199035
TATCCC	1383	47	0.0339841	0.0343001
TATTCC	1584	65	0.0410354	0.0419032
TACCCT	1585	34	0.0214511	0.0210042
TACTCT	1768	32	0.0180995	0.0211776
TATCCT	1733	77	0.0444316	0.0482556
TATTCT	1673	73	0.0436342	0.0441476
TACCCG	737	16	0.0217096	0.0239846
TACTCG	433	3	0.00692841	0.00689633
TATCCG	389	13	0.033419	0.0375401
TATTCG	235	10	0.0425532	0.0665576
TACCTA	636	20	0.0314465	0.0336552
TACTTA	1100	32	0.0290909	0.0282703
TATCTA	794	25	0.0314861	0.0330553
TATTTA	1793	119	0.0663692	0.0664632
TACCTC	1553	32	0.0206053	0.022771
TACTTC	1768	47	0.0265837	0.0292872
TATCTC	1390	39	0.0280576	0.02729
TATTTC	2406	85	0.0353283	0.0365892
TACCTT	820	26	0.0317073	0.0331815
TACTTT	1473	22	0.0149355	0.0160811
TATCTT	1267	47	0.0370955	0.0389072
TATTTT	2422	78	0.0322048	0.0320066
TACCTG	726	15	0.0206612	0.0202622
TACTTG	1493	33	0.0221031	0.0216291
TATCTG	1776	58	0.0326577	0.0316089
TATTTG	1952	72	0.0368852	0.0375932
TACCGA	343	5	0.0145773	0.0144068
TACTGA	2089	25	0.0119674	0.0118299
TATCGA	118	0	0	0
TATTGA	920	33	0.0358696	0.0346206
TACCGC	842	9	0.0106888	0.0105872
TACTGC	2356	19	0.00806452	0.00800288
TATCGC	356	5	0.0140449	0.0138867
TATTGC	1380	35	0.0253623	0.0261873
TACCGT	367	2	0.00544959	0.0054347
TACTGT	2000	31	0.0155	0.0162679
TATCGT	206	4	0.0194175	0.0191333
TATTGT	1233	33	0.026764	0.0276922
TACCGG	595	6	0.010084	0.00999915
TACTGG	2403	33	0.0137328	0.0135499
TATCGG	215	4	0.0186047	0.0183438
TATTGG	1626	108	0.0664207	0.0768163
TCCCAA	3202	112	0.0349781	0.0368892
TCCTAA	1839	41	0.0222947	0.0218095
TCTCAA	2413	110	0.0455864	0.0493306
TCTTAA	1531	131	0.085565	0.0835235
TCCCAC	5076	169	0.0332939	0.0333741
TCCTAC	2024	49	0.0242095	0.0246237
TCTCAC	3298	154	0.046695	0.0475611
TCTTAC	1658	122	0.0735826	0.0754514
TCCCAT	3429	118	0.0344124	0.0344047
TCCTAT	1730	63	0.0364162	0.0385806
TCTCAT	3227	215	0.0666253	0.0708852
TCTTAT	1436	119	0.0828691	0.0858109
TCCCAG	9695	235	0.0242393	0.0244794
TCCTAG	2812	72	0.0256046	0.0263808
TCTCAG	5339	217	0.0406443	0.0416224
TCTTAG	2014	132	0.0655412	0.0692243
TCCCCA	6235	161	0.025822	0.0261217
TCCTCA	4806	83	0.0172701	0.0169754
TCTCCA	5312	186	0.0350151	0.0345485
TCTTCA	2924	154	0.0526676	0.0526477
TCCCCC	4987	96	0.0192501	0.0196855
TCCTCC	10133	170	0.0167769	0.0166944
TCTCCC	6480	280	0.0432099	0.0441274
TCTTCC	5610	330	0.0588235	0.0603652
TCCCCT	5720	162	0.0283217	0.0289232
TCCTCT	6783	153	0.0225564	0.0220509
TCTCCT	5986	297	0.0496158	0.0498353
TCTTCT	3858	218	0.056506	0.0564381
TCCCCG	4591	66	0.014376	0.0154796
TCCTCG	1943	25	0.0128667	0.0127077
TCTCCG	2322	63	0.0271318	0.0272687
TCTTCG	814	33	0.0405405	0.0414049
TCCCTA	2429	74	0.0304652	0.0311967
TCCTTA	2143	75	0.0349977	0.0337886
TCTCTA	2408	124	0.051495	0.0530181
TCTTTA	1919	134	0.069828	0.0670715
TCCCTC	7979	224	0.0280737	0.0277904
TCCTTC	5235	108	0.0206304	0.0205907
TCTCTC	5893	305	0.0517563	0.0507832
TCTTTC	3799	217	0.0571203	0.0580845
TCCCTT	4541	174	0.0383176	0.0395006
TCCTTT	4307	113	0.0262364	0.0260184
TCTCTT	3884	261	0.0671988	0.0714553
TCTTTT	2972	214	0.0720054	0.0755944
TCCCTG	7939	218	0.0274594	0.0274646
TCCTTG	3847	75	0.0194957	0.0196406
TCTCTG	6886	310	0.0450189	0.0447413
TCTTTG	3144	165	0.0524809	0.0529242
TCCCGA	1479	25	0.0169033	0.017982
TCCTGA	5059	58	0.0114647	0.0121263
TCTCGA	551	16	0.0290381	0.0318825
TCTTGA	2162	88	0.0407031	0.0455429
TCCCGC	5220	71	0.0136015	0.0134191
TCCTGC	7567	86	0.0113651	0.0117661
TCTCGC	1926	40	0.0207684	0.0213866
TCTTGC	3092	125	0.0404269	0.0413933
TCCCGT	1407	30	0.021322	0.0208822
TCCTGT	5315	93	0.0174976	0.0171947
TCTCGT	725	19	0.0262069	0.0255553
TCTTGT	2365	122	0.0515856	0.0531754
TCCCGG	4663	61	0.0130817	0.0133423
TCCTGG	8436	91	0.0107871	0.0109091
TCTCGG	1797	37	0.0205899	0.0212907
TCTTGG	3630	121	0.0333333	0.0327822
TTCCAA	3236	107	0.0330655	0.0326003
TTCTAA	1829	48	0.0262438	0.0255691
TTTCAA	2302	133	0.0577758	0.0579382
TTTTAA	2220	181	0.0815315	0.0875362
TTCCAC	3712	134	0.0360991	0.0401947
TTCTAC	1383	31	0.022415	0.0233756
TTTCAC	2512	128	0.0509554	0.0563432
TTTTAC	1400	125	0.0892857	0.0899495
TTCCAT	3166	109	0.0344283	0.0351492
TTCTAT	1609	64	0.0397763	0.0407054
TTTCAT	2847	205	0.0720056	0.0787909
TTTTAT	2093	199	0.0950788	0.104244
TTCCAG	6353	176	0.0277034	0.0281997
TTCTAG	2013	47	0.0233482	0.0238085
TTTCAG	3609	159	0.0440565	0.0421272
TTTTAG	1615	132	0.0817337	0.0887306
TTCCCA	6098	153	0.0250902	0.0261048
TTCTCA	4095	61	0.0148962	0.0161435
TTTCCA	4353	192	0.0441075	0.0490651
TTTTCA	2892	136	0.0470263	0.0475975
TTCCCC	5305	140	0.0263902	0.0272069
TTCTCC	4963	87	0.0175297	0.0172259
TTTCCC	5433	267	0.0491441	0.0518922
TTTTCC	4151	200	0.0481812	0.0497262
TTCCCT	6050	154	0.0254545	0.0261332
TTCTCT	5066	85	0.0167785	0.0168951
TTTCCT	6425	435	0.0677043	0.0712249
TTTTCT	4118	236	0.0573094	0.0598676
TTCCCG	2798	58	0.0207291	0.0231669
TTCTCG	1080	22	0.0203704	0.0199739
TTTCCG	1822	127	0.0697036	0.0692738
TTTTCG	499	15	0.0300601	0.0292151
TTCCTA	2794	84	0.0300644	0.0313192
TTCTTA	2070	43	0.0207729	0.0213179
TTTCTA	2094	94	0.0448902	0.0457622
TTTTTA	2195	116	0.0528474	0.0528121
TTCCTC	6695	256	0.0382375	0.0430552
TTCTTC	3559	75	0.0210733	0.0211972
TTTCTC	4505	230	0.0510544	0.052011
TTTTTC	3215	141	0.0438569	0.0431911
TTCCTT	5452	231	0.0423698	0.0468194
TTCTTT	3951	75	0.0189825	0.0191332
TTTCTT	3921	217	0.055343	0.0563751
TTTTTT	6699	210	0.031348	0.0312656
TTCCTG	9001	378	0.0419953	0.0435695
TTCTTG	2956	73	0.0246955	0.0254475
TTTCTG	4926	198	0.0401949	0.0406175
TTTTTG	2369	101	0.042634	0.0450566
TTCCGA	910	23	0.0252747	0.0290635
TTCTGA	4236	42	0.00991501	0.0102913
TTTCGA	361	11	0.0304709	0.0296245
TTTTGA	2152	93	0.0432156	0.0432268
TTCCGC	2540	89	0.0350394	0.0377635
TTCTGC	4409	54	0.0122477	0.0125541
TTTCGC	726	22	0.030303	0.0294253
TTTTGC	2344	124	0.052901	0.0560991
TTCCGT	1240	49	0.0395161	0.0460563
TTCTGT	3926	68	0.0173204	0.0170248
TTTCGT	451	29	0.0643016	0.0780783
TTTTGT	2493	147	0.0589651	0.0587208
TTCCGG	3834	304	0.0792906	0.0886761
TTCTGG	4917	43	0.00874517	0.00867046
TTTCGG	695	16	0.0230216	0.022524
TTTTGG	2126	76	0.0357479	0.0382509
TGCCAA	3221	34	0.0105557	0.0104475
TGCTAA	1996	38	0.0190381	0.0196875
TGTCAA	1572	33	0.0209924	0.0218378
TGTTAA	1358	54	0.0397644	0.041159
TGCCAC	4425	77	0.0174011	0.0175543
TGCTAC	1735	31	0.0178674	0.0175583
TGTCAC	2786	45	0.0161522	0.015897
TGTTAC	1506	46	0.0305445	0.032289
TGCCAT	3492	93	0.0266323	0.0265034
TGCTAT	1971	35	0.0177575	0.017451
TGTCAT	3348	63	0.0188172	0.0196637
TGTTAT	1549	65	0.0419626	0.0428116
TGCCAG	6033	77	0.0127631	0.0126023
TGCTAG	2082	37	0.0177714	0.018425
TGTCAG	3744	56	0.0149573	0.0163405
TGTTAG	1717	58	0.0337798	0.0338233
TGCCCA	5610	82	0.0146168	0.0147622
TGCTCA	4650	53	0.0113978	0.0117006
TGTCCA	3532	59	0.0167044	0.0169964
TGTTCA	2425	52	0.0214433	0.0226423
TGCCCC	5885	94	0.0159728	0.0160603
TGCTCC	5323	63	0.0118354	0.0116976
TGTCCC	3396	74	0.0217903	0.0225
TGTTCC	2901	83	0.0286108	0.0284915
TGCCCT	6359	117	0.0183991	0.0180634
TGCTCT	5390	98	0.0181818	0.0189679
TGTCCT	3887	65	0.0167224	0.0174763
TGTTCT	3196	84	0.0262829	0.026852
TGCCCG	2790	30	0.0107527	0.011358
TGCTCG	1315	11	0.00836502	0.00830136
TGTCCG	1148	12	0.010453	0.0103527
TGTTCG	502	9	0.0179283	0.017642
TGCCTA	2219	41	0.0184768	0.0181436
TGCTTA	2201	48	0.0218083	0.0213424
TGTCTA	1633	22	0.0134721	0.0132988
TGTTTA	2469	108	0.0437424	0.0426563
TGCCTC	5726	112	0.0195599	0.01953
TGCTTC	4183	76	0.0181688	0.0178429
TGTCTC	4111	69	0.0167842	0.0169932
TGTTTC	3370	97	0.0287834	0.0291505
TGCCTT	4192	84	0.0200382	0.0196413
TGCTTT	3676	81	0.0220348	0.0220994
TGTCTT	3048	83	0.027231	0.0278109
TGTTTT	3262	106	0.0324954	0.033289
TGCCTG	7682	110	0.0143192	0.0143764
TGCTTG	3323	54	0.0162504	0.0159911
TGTCTG	4798	77	0.0160484	0.016628
TGTTTG	3009	90	0.0299103	0.0303551
TGCCGA	1010	10	0.00990099	0.00981268
TGCTGA	5829	60	0.0102934	0.0101892
TGTCGA	327	2	0.00611621	0.0122324
TGTTGA	2370	54	0.0227848	0.0222751
TGCCGC	2816	21	0.00745739	0.0074044
TGCTGC	6962	54	0.00775639	0.00798465
TGTCGC	847	8	0.0094451	0.00936695
TGTTGC	2763	49	0.0177343	0.0195985
TGCCGT	1150	10	0.00869565	0.00862754
TGCTGT	5357	59	0.0110136	0.0112678
TGTCGT	555	6	0.0108108	0.0107132
TGTTGT	2338	55	0.0235244	0.0255482
TGCCGG	2785	19	0.00682226	0.00677815
TGCTGG	8158	83	0.0101741	0.0100718
TGTCGG	960	8	0.00833333	0.00827251
TGTTGG	2819	51	0.0180915	0.0177705
GACCAA	2406	52	0.0216126	0.0219859
GACTAA	2780	58	0.0208633	0.0204354
GATCAA	838	19	0.022673	0.0221854
GATTAA	1075	42	0.0390698	0.0394405
GACCAC	2979	58	0.0194696	0.019097
GACTAC	1688	24	0.014218	0.0140242
GATCAC	1568	32	0.0204082	0.0212808
GATTAC	1173	32	0.0272805	0.0282654
GACCAT	1548	39	0.0251938	0.0258678
GACTAT	1137	25	0.0219877	0.0232837
GATCAT	1327	50	0.037679	0.0423198
GATTAT	989	33	0.033367	0.0322863
GACCAG	3599	62	0.017227	0.0169349
GACTAG	1528	28	0.0183246	0.0180006
GATCAG	1815	47	0.0258953	0.0285463
GATTAG	1110	43	0.0387387	0.0390751
GACCCA	2947	58	0.019681	0.0199791
GACTCA	12307	141	0.0114569	0.0113266
GATCCA	1699	40	0.0235433	0.0241804
GATTCA	3899	102	0.0261606	0.027535
GACCCC	2222	30	0.0135014	0.0133251
GACTCC	3902	49	0.0125577	0.0129158
GATCCC	2097	43	0.0205055	0.0210488
GATTCC	2644	69	0.0260968	0.0261821
GACCCT	1964	34	0.0173116	0.0170206
GACTCT	3216	44	0.0136816	0.0147428
GATCCT	1954	39	0.0199591	0.0195707
GATTCT	2158	62	0.0287303	0.0306995
GACCCG	2154	18	0.00835655	0.00829056
GACTCG	1302	19	0.0145929	0.014391
GATCCG	922	9	0.00976139	0.0096766
GATTCG	485	10	0.0206186	0.0202352
GACCTA	1165	15	0.0128755	0.0127207
GACTTA	1305	24	0.0183908	0.0180664
GATCTA	836	15	0.0179426	0.020037
GATTTA	1102	37	0.0335753	0.0324775
GACCTC	3130	67	0.0214058	0.0215934
GACTTC	2814	43	0.0152807	0.0157636
GATCTC	1873	33	0.0176188	0.018386
GATTTC	2107	50	0.0237304	0.024128
GACCTT	1749	45	0.025729	0.0273697
GACTTT	1986	23	0.0115811	0.0124603
GATCTT	1335	26	0.0194757	0.0191107
GATTTT	1684	34	0.02019	0.0221708
GACCTG	2985	31	0.0103853	0.0102809
GACTTG	2409	37	0.0153591	0.0151294
GATCTG	2400	43	0.0179167	0.017603
GATTTG	1646	56	0.0340219	0.0328844
GACCGA	787	9	0.0114358	0.0113194
GACTGA	3398	40	0.0117716	0.0122252
GATCGA	241	2	0.00829876	0.00826418
GATTGA	1155	23	0.0199134	0.0212669
GACCGC	1942	22	0.0113285	0.011206
GACTGC	3600	40	0.0111111	0.0115464
GATCGC	724	3	0.00414365	0.00413218
GATTGC	1572	23	0.014631	0.0169723
GACCGT	709	7	0.00987306	0.00978939
GACTGT	3024	41	0.0135582	0.0140404
GATCGT	270	1	0.0037037	0.0037037
GATTGT	1298	37	0.0285054	0.0277142
GACCGG	1707	9	0.00527241	0.00524768
GACTGG	4141	34	0.00821058	0.00814513
GATCGG	505	2	0.0039604	0.00395254
GATTGG	3801	416	0.109445	0.124334
GCCCAA	3163	85	0.0268732	0.0267918
GCCTAA	1520	42	0.0276316	0.0282024
GCTCAA	2297	105	0.0457118	0.0462545
GCTTAA	1380	118	0.0855072	0.0826034
GCCCAC	5100	167	0.0327451	0.0328558
GCCTAC	1826	46	0.0251917	0.0245705
GCTCAC	4056	209	0.0515286	0.0528312
GCTTAC	1349	104	0.0770941	0.0801055
GCCCAT	2893	109	0.0376772	0.0383448
GCCTAT	1555	47	0.0302251	0.0306174
GCTCAT	3183	192	0.0603205	0.0604709
GCTTAT	1273	124	0.0974077	0.110001
GCCCAG	10693	272	0.0254372	0.0261019
GCCTAG	2760	60	0.0217391	0.0219991
GCTCAG	6988	283	0.040498	0.0417259
GCTTAG	2227	166	0.0745397	0.0753039
GCCCCA	7347	148	0.0201443	0.0205579
GCCTCA	5173	102	0.0197178	0.0201061
GCTCCA	5760	193	0.0335069	0.0348208
GCTTCA	3058	187	0.0611511	0.0607016
GCCCCC	8971	206	0.0229629	0.0235529
GCCTCC	10255	212	0.0206728	0.0220029
GCTCCC	8133	318	0.0391	0.0417568
GCTTCC	6864	410	0.0597319	0.0634577
GCCCCT	7357	198	0.0269131	0.0267362
GCCTCT	7054	142	0.0201304	0.0205787
GCTCCT	6477	299	0.0461633	0.0489804
GCTTCT	4471	248	0.0554686	0.0573252
GCCCCG	10925	123	0.0112586	0.011499
GCCTCG	3400	38	0.0111765	0.0110548
GCTCCG	5075	113	0.022266	0.022957
GCTTCG	1281	40	0.0312256	0.0318367
GCCCTA	2252	65	0.0288632	0.0298196
GCCTTA	1884	48	0.0254777	0.0248418
GCTCTA	2114	102	0.0482498	0.0506761
GCTTTA	1706	130	0.0762016	0.0809934
GCCCTC	8374	230	0.027466	0.0279091
GCCTTC	4742	129	0.0272037	0.0268911
GCTCTC	5250	313	0.059619	0.0610286
GCTTTC	3408	197	0.0578052	0.0585889
GCCCTT	3929	200	0.0509035	0.0569805
GCCTTT	3431	95	0.0276887	0.0286792
GCTCTT	3557	216	0.0607253	0.0660527
GCTTTT	2584	167	0.0646285	0.0744123
GCCCTG	9580	230	0.0240084	0.0242696
GCCTTG	4395	102	0.0232082	0.0244954
GCTCTG	8642	357	0.0413099	0.0414596
GCTTTG	3579	199	0.0556021	0.0592329
GCCCGA	2129	25	0.0117426	0.01255
GCCTGA	5446	67	0.0123026	0.0125208
GCTCGA	770	12	0.0155844	0.0153615
GCTTGA	2094	77	0.0367717	0.0373476
GCCCGC	7318	70	0.00956546	0.00947525
GCCTGC	8414	141	0.0167578	0.0171921
GCTCGC	2959	46	0.0155458	0.0159854
GCTTGC	3026	122	0.0403173	0.040688
GCCCGT	1536	27	0.0175781	0.0172804
GCCTGT	5061	102	0.0201541	0.0201471
GCTCGT	924	26	0.0281385	0.0338769
GCTTGT	2406	111	0.0461347	0.0456878
GCCCGG	7138	65	0.00910619	0.00958499
GCCTGG	10673	134	0.012555	0.0127734
GCTCGG	3240	54	0.0166667	0.0163939
GCTTGG	4097	137	0.0334391	0.0333054
GTCCAA	1796	56	0.0311804	0.0324534
GTCTAA	1108	23	0.0207581	0.0203456
GTTCAA	1227	59	0.0480848	0.0507039
GTTTAA	1340	81	0.0604478	0.0583299
GTCCAC	2466	77	0.0312247	0.0310733
GTCTAC	1019	30	0.0294406	0.0286019
GTTCAC	1713	94	0.0548745	0.0577347
GTTTAC	1426	80	0.056101	0.0600084
GTCCAT	1666	83	0.0498199	0.0497687
GTCTAT	1064	40	0.037594	0.0399776
GTTCAT	1514	85	0.0561427	0.0583132
GTTTAT	1586	134	0.0844893	0.0925416
GTCCAG	4068	95	0.023353	0.0247803
GTCTAG	1489	30	0.0201478	0.0197551
GTTCAG	2487	102	0.0410133	0.040956
GTTTAG	1445	92	0.0636678	0.0638106
GTCCCA	3414	67	0.0196251	0.0210036
GTCTCA	2971	58	0.019522	0.0198208
GTTCCA	2473	83	0.0335625	0.0348763
GTTTCA	2429	102	0.0419926	0.0435407
GTCCCC	3591	73	0.0203286	0.0210351
GTCTCC	4235	78	0.0184179	0.0185554
GTTCCC	3475	151	0.0434532	0.0467584
GTTTCC	3982	179	0.0449523	0.0479662
GTCCCT	3727	86	0.0230749	0.0241588
GTCTCT	3734	60	0.0160686	0.0163504
GTTCCT	3301	162	0.049076	0.0515302
GTTTCT	3268	158	0.0483476	0.0515338
GTCCCG	2981	47	0.0157665	0.0155231
GTCTCG	1158	20	0.0172712	0.0187161
GTTCCG	1521	52	0.034188	0.0369883
GTTTCG	533	14	0.0262664	0.0256246
GTCCTA	1412	42	0.029745	0.0302982
GTCTTA	1263	33	0.0261283	0.0254657
GTTCTA	1302	57	0.0437788	0.0434317
GTTTTA	1519	73	0.0480579	0.0523661
GTCCTC	3597	104	0.028913	0.0291972
GTCTTC	2556	56	0.0219092	0.0222204
GTTCTC	2768	151	0.054552	0.0566544
GTTTTC	2727	122	0.0447378	0.044953
GTCCTT	2363	88	0.0372408	0.0367158
GTCTTT	2169	59	0.0272015	0.0283188
GTTCTT	2092	100	0.0478011	0.0464944
GTTTTT	2097	80	0.0381497	0.0367118
GTCCTG	4762	102	0.0214196	0.0218053
GTCTTG	2300	48	0.0208696	0.0221828
GTTCTG	3373	125	0.037059	0.0392549
GTTTTG	2230	92	0.0412556	0.0413659
GTCCGA	682	10	0.0146628	0.014469
GTCTGA	3145	39	0.0124006	0.0122508
GTTCGA	356	6	0.0168539	0.0166166
GTTTGA	1665	57	0.0342342	0.034284
GTCCGC	2077	18	0.00866635	0.00859538
GTCTGC	3555	40	0.0112518	0.0111283
GTTCGC	728	19	0.0260989	0.0254527
GTTTGC	2213	77	0.0347944	0.0372156
GTCCGT	805	10	0.0124224	0.0122833
GTCTGT	3106	49	0.0157759	0.0168203
GTTCGT	407	11	0.027027	0.0263613
GTTTGT	2186	95	0.0434584	0.0425041
GTCCGG	1871	25	0.0133618	0.0131903
GTCTGG	4299	55	0.0127937	0.0130983
GTTCGG	763	14	0.0183486	0.0206603
GTTTGG	2490	82	0.0329317	0.0334671
GGCCAA	4374	36	0.00823045	0.00862193
GGCTAA	1705	28	0.0164223	0.0161621
GGTCAA	1447	17	0.0117484	0.0116184
GGTTAA	1247	33	0.0264635	0.0257839
GGCCAC	6232	71	0.0113928	0.0115858
GGCTAC	2024	16	0.00790514	0.00784652
GGTCAC	2963	19	0.00641242	0.00637345
GGTTAC	1313	45	0.0342727	0.0346477
GGCCAT	2923	48	0.0164215	0.0161573
GGCTAT	1475	29	0.019661	0.0206444
GGTCAT	2110	28	0.0132701	0.0140486
GGTTAT	1142	34	0.0297723	0.0289113
GGCCAG	8534	79	0.00925709	0.00940685
GGCTAG	2263	24	0.0106054	0.0122659
GGTCAG	3965	50	0.0126103	0.0124545
GGTTAG	1530	33	0.0215686	0.0224253
GGCCCA	5522	63	0.0114089	0.0112808
GGCTCA	4996	60	0.0120096	0.0122682
GGTCCA	2145	23	0.0107226	0.0106126
GGTTCA	1723	34	0.019733	0.0193549
GGCCCC	8600	65	0.00755814	0.00773447
GGCTCC	8807	81	0.00919723	0.00934079
GGTCCC	3633	43	0.0118359	0.0128004
GGTTCC	3111	58	0.0186435	0.0183018
GGCCCT	6043	67	0.0110872	0.0109661
GGCTCT	6039	66	0.010929	0.0108113
GGTCCT	2865	29	0.0101222	0.0100232
GGTTCT	2476	43	0.0173667	0.0186882
GGCCCG	5476	42	0.00766983	0.0076124
GGCTCG	2716	5	0.00184094	0.00183823
GGTCCG	1534	5	0.00325945	0.00325095
GGTTCG	733	7	0.0095498	0.00947152
GGCCTA	2079	26	0.012506	0.013318
GGCTTA	1877	28	0.0149174	0.0147027
GGTCTA	1110	15	0.0135135	0.0133429
GGTTTA	1402	44	0.0313837	0.0304205
GGCCTC	7162	75	0.0104719	0.010643
GGCTTC	5049	82	0.0162408	0.0159802
GGTCTC	2728	41	0.0150293	0.0148089
GGTTTC	2946	51	0.0173116	0.0176968
GGCCTT	3884	76	0.0195675	0.0202196
GGCTTT	3482	59	0.0169443	0.0172365
GGTCTT	1840	30	0.0163043	0.0171348
GGTTTT	2429	65	0.02676	0.0285258
GGCCTG	8924	104	0.011654	0.012416
GGCTTG	3836	59	0.0153806	0.016191
GGTCTG	3568	35	0.00980942	0.0102766
GGTTTG	2589	56	0.02163	0.0219431
GGCCGA	2522	13	0.00515464	0.0051301
GGCTGA	6902	57	0.00825848	0.00848127
GGTCGA	473	0	0	0
GGTTGA	1844	26	0.0140998	0.0139085
GGCCGC	7560	34	0.00449735	0.00500689
GGCTGC	9732	60	0.00616523	0.00612785
GGTCGC	1464	10	0.0068306	0.00678858
GGTTGC	2422	34	0.014038	0.0146727
GGCCGT	1944	15	0.00771605	0.00766045
GGCTGT	5703	57	0.00999474	0.0102473
GGTCGT	519	3	0.00578035	0.00575803
GGTTGT	1757	40	0.0227661	0.0222605
GGCCGG	7406	37	0.00499595	0.00497166
GGCTGG	11483	70	0.00609597	0.00605933
GGTCGG	1608	4	0.00248756	0.00248292
GGTTGG	3186	50	0.0156937	0.0160802

## Sheet: 2_CPD_nakedDNA_6mer
seq	kmer_count	damage_count	mean	var
AACCAA	2511	232	0.0923935	0.0958425
AACTAA	1144	81	0.0708042	0.0745974
AATCAA	1426	167	0.117111	0.127328
AATTAA	794	136	0.171285	0.187522
AACCAC	3994	405	0.101402	0.10667
AACTAC	1489	102	0.0685024	0.0759494
AATCAC	2900	328	0.113103	0.114144
AATTAC	1190	214	0.179832	0.201443
AACCAT	1806	200	0.110742	0.111829
AACTAT	1236	92	0.0744337	0.0786657
AATCAT	2838	392	0.138125	0.150107
AATTAT	1015	145	0.142857	0.1561
AACCAG	3270	249	0.0761468	0.0789353
AACTAG	1161	80	0.0689061	0.0659375
AATCAG	3370	412	0.122255	0.133461
AATTAG	998	174	0.174349	0.198258
AACCCA	2738	169	0.0617239	0.0645118
AACTCA	2633	112	0.042537	0.0430227
AATCCA	2179	209	0.0959156	0.09502
AATTCA	1991	231	0.116022	0.128743
AACCCC	2544	196	0.077044	0.0805739
AACTCC	2905	123	0.0423408	0.0440055
AATCCC	2889	342	0.11838	0.131411
AATTCC	3665	365	0.0995907	0.103889
AACCCT	2582	202	0.0782339	0.0845396
AACTCT	2481	95	0.038291	0.039259
AATCCT	2531	301	0.118925	0.126167
AATTCT	2602	220	0.0845503	0.0881964
AACCCG	1373	82	0.0597232	0.0649437
AACTCG	687	26	0.0378457	0.0364665
AATCCG	743	63	0.0847914	0.0830972
AATTCG	355	41	0.115493	0.113742
AACCTA	1075	63	0.0586047	0.0589459
AACTTA	1017	53	0.0521141	0.0553523
AATCTA	994	87	0.0875252	0.0980718
AATTTA	1292	140	0.108359	0.112184
AACCTC	2700	200	0.0740741	0.0789867
AACTTC	2267	107	0.0471989	0.0511693
AATCTC	2003	167	0.0833749	0.0884497
AATTTC	2102	173	0.0823026	0.0888918
AACCTT	1490	120	0.0805369	0.0794732
AACTTT	1615	74	0.0458204	0.0474655
AATCTT	1596	128	0.0802005	0.0901156
AATTTT	1783	131	0.0734717	0.0748458
AACCTG	2205	133	0.0603175	0.0621496
AACTTG	1796	98	0.0545657	0.0571881
AATCTG	2521	188	0.0745736	0.0761826
AATTTG	1709	158	0.0924517	0.0968341
AACCGA	602	33	0.0548173	0.0552263
AACTGA	2546	98	0.0384918	0.0393822
AATCGA	291	22	0.0756014	0.0701268
AATTGA	1013	87	0.0858835	0.0963717
AACCGC	1304	89	0.0682515	0.0728516
AACTGC	3051	132	0.0432645	0.0433735
AATCGC	702	57	0.0811966	0.0889755
AATTGC	1521	135	0.0887574	0.0901433
AACCGT	573	48	0.0837696	0.0838795
AACTGT	2352	107	0.0454932	0.043442
AATCGT	354	40	0.112994	0.117508
AATTGT	1297	114	0.0878951	0.0972068
AACCGG	1149	40	0.0348129	0.0336302
AACTGG	2854	116	0.0406447	0.0418104
AATCGG	649	61	0.0939908	0.0945472
AATTGG	1378	125	0.0907112	0.101424
ACCCAA	2291	235	0.102575	0.0990807
ACCTAA	1008	81	0.0803571	0.0918481
ACTCAA	2636	430	0.163126	0.182867
ACTTAA	1310	283	0.216031	0.230606
ACCCAC	3618	386	0.106689	0.115239
ACCTAC	1219	83	0.0680886	0.0684307
ACTCAC	6377	1220	0.191313	0.208375
ACTTAC	1239	235	0.189669	0.216824
ACCCAT	1940	284	0.146392	0.17041
ACCTAT	740	54	0.072973	0.0704458
ACTCAT	6169	1476	0.239261	0.283212
ACTTAT	1026	246	0.239766	0.311237
ACCCAG	5790	446	0.0770294	0.0856184
ACCTAG	1658	103	0.062123	0.0667479
ACTCAG	7736	1301	0.168175	0.187745
ACTTAG	1698	349	0.205536	0.2506
ACCCCA	3666	232	0.0632842	0.0691182
ACCTCA	3255	154	0.0473118	0.0536921
ACTCCA	3846	605	0.157306	0.171087
ACTTCA	2470	340	0.137652	0.143053
ACCCCC	3123	314	0.100544	0.10648
ACCTCC	4387	244	0.0556189	0.0593773
ACTCCC	4418	868	0.196469	0.215863
ACTTCC	5905	996	0.168671	0.188009
ACCCCT	3102	272	0.0876854	0.0890518
ACCTCT	3150	187	0.0593651	0.0609396
ACTCCT	3746	783	0.209023	0.23053
ACTTCT	2845	407	0.143058	0.143029
ACCCCG	2493	139	0.0557561	0.0582865
ACCTCG	1233	60	0.0486618	0.0495782
ACTCCG	1684	204	0.12114	0.130296
ACTTCG	657	61	0.0928463	0.087403
ACCCTA	1379	121	0.0877447	0.0902633
ACCTTA	846	78	0.0921986	0.0932645
ACTCTA	1496	239	0.159759	0.185162
ACTTTA	1363	193	0.141599	0.164223
ACCCTC	3487	395	0.113278	0.117113
ACCTTC	1974	133	0.0673759	0.0679366
ACTCTC	3081	587	0.190523	0.221157
ACTTTC	2352	309	0.131378	0.139687
ACCCTT	2013	235	0.116741	0.124039
ACCTTT	1299	78	0.0600462	0.0611066
ACTCTT	2402	412	0.171524	0.189643
ACTTTT	1850	214	0.115676	0.123983
ACCCTG	4541	366	0.080599	0.0816081
ACCTTG	1897	118	0.0622035	0.0710232
ACTCTG	4805	664	0.138189	0.151174
ACTTTG	2324	280	0.120482	0.125814
ACCCGA	966	50	0.0517598	0.0512042
ACCTGA	1684	69	0.0409739	0.0428834
ACTCGA	485	52	0.107216	0.133109
ACTTGA	1897	211	0.111228	0.114731
ACCCGC	2427	143	0.0589205	0.0612425
ACCTGC	2829	120	0.0424178	0.044169
ACTCGC	1291	147	0.113865	0.119583
ACTTGC	2104	242	0.115019	0.12181
ACCCGT	750	57	0.076	0.072988
ACCTGT	1328	63	0.0474398	0.0497448
ACTCGT	516	92	0.178295	0.185625
ACTTGT	1695	223	0.131563	0.134393
ACCCGG	2664	137	0.0514264	0.0533063
ACCTGG	2901	116	0.0399862	0.0432281
ACTCGG	1429	127	0.0888733	0.104841
ACTTGG	2880	276	0.0958333	0.0998784
ATCCAA	1751	223	0.127356	0.140914
ATCTAA	1056	117	0.110795	0.125153
ATTCAA	1860	323	0.173656	0.19199
ATTTAA	1535	408	0.265798	0.298275
ATCCAC	2213	274	0.123814	0.139274
ATCTAC	1142	104	0.0910683	0.0916117
ATTCAC	2721	522	0.191841	0.222007
ATTTAC	1404	332	0.236467	0.277614
ATCCAT	1750	241	0.137714	0.148548
ATCTAT	982	109	0.110998	0.115088
ATTCAT	3556	777	0.218504	0.246195
ATTTAT	1912	491	0.256799	0.288284
ATCCAG	3181	284	0.0892801	0.0945423
ATCTAG	1458	111	0.0761317	0.0758747
ATTCAG	3261	507	0.155474	0.180422
ATTTAG	1343	307	0.228593	0.233101
ATCCCA	3522	272	0.0772288	0.0854853
ATCTCA	2823	131	0.0464045	0.0456843
ATTCCA	4872	723	0.148399	0.157608
ATTTCA	2974	430	0.144586	0.165431
ATCCCC	2814	305	0.108387	0.122269
ATCTCC	2881	203	0.0704616	0.0745473
ATTCCC	3317	667	0.201085	0.227647
ATTTCC	4477	758	0.16931	0.191614
ATCCCT	3265	333	0.101991	0.111837
ATCTCT	3039	182	0.0598881	0.0629033
ATTCCT	5173	938	0.181326	0.191399
ATTTCT	3446	479	0.139002	0.151645
ATCCCG	1367	77	0.0563277	0.0605145
ATCTCG	690	51	0.073913	0.0743548
ATTCCG	847	119	0.140496	0.172909
ATTTCG	392	38	0.0969388	0.113341
ATCCTA	1463	111	0.0758715	0.0742669
ATCTTA	1198	90	0.0751252	0.0812354
ATTCTA	1588	202	0.127204	0.129997
ATTTTA	1869	264	0.141252	0.172757
ATCCTC	3198	372	0.116323	0.13035
ATCTTC	1996	150	0.0751503	0.0775576
ATTCTC	2832	428	0.15113	0.161539
ATTTTC	2340	287	0.12265	0.13758
ATCCTT	2387	247	0.103477	0.114602
ATCTTT	2023	140	0.0692042	0.0693924
ATTCTT	3253	508	0.156164	0.169947
ATTTTT	3013	292	0.0969134	0.101494
ATCCTG	4152	352	0.0847784	0.0930277
ATCTTG	2206	156	0.0707162	0.0775366
ATTCTG	3318	389	0.117239	0.125232
ATTTTG	2034	245	0.120452	0.133541
ATCCGA	524	31	0.0591603	0.0595909
ATCTGA	2820	127	0.0450355	0.0458604
ATTCGA	285	45	0.157895	0.182728
ATTTGA	1761	230	0.130608	0.144296
ATCCGC	1022	80	0.0782779	0.0780977
ATCTGC	3024	179	0.0591931	0.0629853
ATTCGC	500	75	0.15	0.17986
ATTTGC	2112	288	0.136364	0.14151
ATCCGT	539	52	0.096475	0.0947645
ATCTGT	2603	139	0.0533999	0.0559483
ATTCGT	376	62	0.164894	0.196738
ATTTGT	2192	382	0.17427	0.195084
ATCCGG	1262	67	0.0530903	0.0518977
ATCTGG	3132	120	0.0383142	0.0413294
ATTCGG	509	57	0.111984	0.13901
ATTTGG	1991	265	0.133099	0.146597
AGCCAA	4957	282	0.0568892	0.0576992
AGCTAA	1763	101	0.0572887	0.0608478
AGTCAA	2448	128	0.0522876	0.0577471
AGTTAA	1291	118	0.091402	0.0924144
AGCCAC	5581	320	0.0573374	0.0597943
AGCTAC	1912	112	0.0585774	0.0614544
AGTCAC	7048	432	0.061294	0.0657756
AGTTAC	1395	113	0.0810036	0.0888426
AGCCAT	3280	242	0.0737805	0.0775069
AGCTAT	1846	120	0.0650054	0.0684007
AGTCAT	7432	464	0.0624327	0.064733
AGTTAT	1385	143	0.103249	0.121557
AGCCAG	8059	394	0.0488894	0.0492352
AGCTAG	2185	111	0.0508009	0.0592313
AGTCAG	7110	356	0.0500703	0.0540406
AGTTAG	1427	111	0.0777856	0.0802004
AGCCCA	6111	274	0.0448372	0.0464345
AGCTCA	4905	200	0.0407747	0.0427906
AGTCCA	3024	160	0.0529101	0.0567431
AGTTCA	2163	164	0.0758206	0.0821302
AGCCCC	6875	366	0.0532364	0.0571015
AGCTCC	6524	303	0.0464439	0.0458267
AGTCCC	4055	238	0.058693	0.0587151
AGTTCC	3262	247	0.0757204	0.0761414
AGCCCT	6263	409	0.0653042	0.0687146
AGCTCT	5253	212	0.0403579	0.0406405
AGTCCT	3589	211	0.0587907	0.0603665
AGTTCT	2850	205	0.0719298	0.0730974
AGCCCG	3871	132	0.0340997	0.0350126
AGCTCG	1541	32	0.0207657	0.0203477
AGTCCG	1270	43	0.0338583	0.0343137
AGTTCG	560	23	0.0410714	0.0466107
AGCCTA	2204	131	0.0594374	0.067732
AGCTTA	1587	86	0.0541903	0.0626353
AGTCTA	1439	83	0.0576789	0.0627348
AGTTTA	1501	127	0.0846103	0.081503
AGCCTC	6849	426	0.0621989	0.0635957
AGCTTC	4025	244	0.0606211	0.0609365
AGTCTC	3441	191	0.0555071	0.062325
AGTTTC	2706	163	0.0602365	0.0603259
AGCCTT	4056	258	0.0636095	0.0659898
AGCTTT	2907	162	0.0557276	0.058146
AGTCTT	2438	157	0.064397	0.0684816
AGTTTT	2117	116	0.0547945	0.0565425
AGCCTG	8329	388	0.0465842	0.0489824
AGCTTG	3191	169	0.0529615	0.0551879
AGTCTG	3938	187	0.047486	0.0482906
AGTTTG	2139	122	0.057036	0.0594208
AGCCGA	1864	69	0.0370172	0.0399602
AGCTGA	5698	166	0.029133	0.0300446
AGTCGA	455	13	0.0285714	0.0278162
AGTTGA	1755	76	0.0433048	0.0425934
AGCCGC	4456	153	0.0343357	0.0340621
AGCTGC	7113	212	0.0298046	0.0303264
AGTCGC	1063	47	0.0442145	0.0498323
AGTTGC	2237	111	0.04962	0.0507568
AGCCGT	1269	48	0.0378251	0.0380003
AGCTGT	4958	167	0.0336829	0.0333619
AGTCGT	608	29	0.0476974	0.0520869
AGTTGT	1984	107	0.0539315	0.0581086
AGCCGG	4173	119	0.0285167	0.030107
AGCTGG	7837	232	0.0296032	0.0312828
AGTCGG	1266	36	0.028436	0.0292303
AGTTGG	2413	78	0.0323249	0.0337805
CACCAA	2965	386	0.130185	0.133518
CACTAA	1557	232	0.149004	0.161588
CATCAA	1751	275	0.157053	0.174749
CATTAA	1314	393	0.299087	0.3545
CACCAC	5207	719	0.138083	0.150541
CACTAC	1618	193	0.119283	0.127383
CATCAC	3643	629	0.17266	0.181328
CATTAC	1756	423	0.240888	0.285529
CACCAT	3117	510	0.163619	0.180537
CACTAT	1448	242	0.167127	0.187668
CATCAT	3093	595	0.19237	0.209748
CATTAT	1380	388	0.281159	0.316831
CACCAG	6209	737	0.118699	0.125567
CACTAG	3064	388	0.126632	0.136751
CATCAG	3844	544	0.141519	0.160035
CATTAG	1724	450	0.261021	0.306756
CACCCA	5815	490	0.0842648	0.0892174
CACTCA	4593	377	0.0820814	0.0875556
CATCCA	3510	428	0.121937	0.128758
CATTCA	3473	573	0.164987	0.179281
CACCCC	6270	787	0.125518	0.13658
CACTCC	5047	465	0.0921339	0.0967415
CATCCC	4596	727	0.158181	0.172797
CATTCC	6293	1001	0.159066	0.180193
CACCCT	5296	696	0.13142	0.142877
CACTCT	4283	351	0.0819519	0.0831936
CATCCT	4976	799	0.160571	0.172202
CATTCT	4541	730	0.160758	0.178997
CACCCG	2548	188	0.0737834	0.0817152
CACTCG	1275	83	0.065098	0.0671875
CATCCG	1282	153	0.119345	0.127042
CATTCG	592	96	0.162162	0.193625
CACCTA	1742	214	0.122847	0.129644
CACTTA	1843	206	0.111774	0.12105
CATCTA	2015	298	0.147891	0.157859
CATTTA	1989	415	0.208648	0.233607
CACCTC	4605	642	0.139414	0.155625
CACTTC	4999	531	0.106221	0.110964
CATCTC	4182	625	0.14945	0.161587
CATTTC	4661	756	0.162197	0.175403
CACCTT	1958	254	0.129724	0.128283
CACTTT	2792	224	0.0802292	0.0910171
CATCTT	3242	484	0.149291	0.168387
CATTTT	3362	405	0.120464	0.136332
CACCTG	2834	316	0.111503	0.114636
CACTTG	2863	286	0.0998952	0.108117
CATCTG	4900	599	0.122245	0.126919
CATTTG	2730	416	0.152381	0.169516
CACCGA	1084	74	0.0682657	0.0765913
CACTGA	4893	335	0.0684652	0.0695143
CATCGA	412	40	0.0970874	0.0976071
CATTGA	1727	228	0.132021	0.144785
CACCGC	3672	310	0.0844227	0.0925712
CACTGC	6768	508	0.0750591	0.0783021
CATCGC	1109	117	0.1055	0.108896
CATTGC	2985	447	0.149749	0.167581
CACCGT	1265	131	0.103557	0.116641
CACTGT	4748	394	0.0829823	0.0900158
CATCGT	690	98	0.142029	0.13945
CATTGT	2528	391	0.154668	0.176702
CACCGG	1993	149	0.0747617	0.0792472
CACTGG	5930	388	0.06543	0.0689177
CATCGG	708	69	0.0974576	0.0937418
CATTGG	3485	458	0.13142	0.13944
CCCCAA	3412	573	0.167937	0.173783
CCCTAA	1710	286	0.167251	0.173298
CCTCAA	2657	655	0.246519	0.26413
CCTTAA	1560	711	0.455769	0.534284
CCCCAC	6977	1258	0.180307	0.198563
CCCTAC	2221	313	0.140928	0.157158
CCTCAC	4603	1390	0.301977	0.367721
CCTTAC	1502	707	0.470706	0.603738
CCCCAT	3392	731	0.215507	0.242248
CCCTAT	1470	270	0.183673	0.204498
CCTCAT	3598	1334	0.370762	0.452434
CCTTAT	1400	751	0.536429	0.719187
CCCCAG	8996	1275	0.14173	0.151228
CCCTAG	3397	500	0.147189	0.165608
CCTCAG	7097	1646	0.231929	0.261872
CCTTAG	2291	1034	0.451331	0.590971
CCCCCA	5417	692	0.127746	0.138035
CCCTCA	4613	534	0.11576	0.120595
CCTCCA	7041	1567	0.222554	0.258844
CCTTCA	3333	1031	0.309331	0.361368
CCCCCC	3408	444	0.130282	0.139171
CCCTCC	11998	1383	0.115269	0.122329
CCTCCC	14675	3675	0.250426	0.2924
CCTTCC	7903	2658	0.336328	0.414331
CCCCCT	6729	1056	0.156933	0.173942
CCCTCT	8417	1187	0.141024	0.149668
CCTCCT	10613	3064	0.288703	0.334095
CCTTCT	5033	1676	0.333002	0.416512
CCCCCG	4973	447	0.0898854	0.0987171
CCCTCG	3185	274	0.0860283	0.091843
CCTCCG	4616	804	0.174177	0.201942
CCTTCG	1402	395	0.28174	0.313856
CCCCTA	2687	464	0.172683	0.185359
CCCTTA	1802	295	0.163707	0.186955
CCTCTA	3407	933	0.273848	0.307545
CCTTTA	1962	815	0.415392	0.536693
CCCCTC	8297	1466	0.17669	0.192017
CCCTTC	5572	858	0.153984	0.16153
CCTCTC	7555	2209	0.292389	0.326597
CCTTTC	4358	1748	0.401101	0.471626
CCCCTT	4485	959	0.213824	0.238167
CCCTTT	3820	566	0.148168	0.157145
CCTCTT	4873	1455	0.298584	0.370805
CCTTTT	2951	989	0.335141	0.391033
CCCCTG	7529	1090	0.144774	0.153852
CCCTTG	3808	562	0.147584	0.161034
CCTCTG	9706	2416	0.248918	0.280949
CCTTTG	3706	1351	0.364544	0.436303
CCCCGA	2213	202	0.0912788	0.0929302
CCCTGA	5494	496	0.0902803	0.0992574
CCTCGA	965	167	0.173057	0.178526
CCTTGA	2634	613	0.232726	0.25687
CCCCGC	13042	1104	0.0846496	0.0926729
CCCTGC	9733	926	0.0951402	0.100894
CCTCGC	3867	547	0.141453	0.158206
CCTTGC	3719	928	0.249529	0.272307
CCCCGT	2009	235	0.116974	0.129239
CCCTGT	4704	492	0.104592	0.108556
CCTCGT	1371	315	0.229759	0.27199
CCTTGT	2825	871	0.308319	0.35781
CCCCGG	5778	403	0.0697473	0.0738951
CCCTGG	9680	699	0.0722107	0.0756819
CCTCGG	3592	458	0.127506	0.138012
CCTTGG	4862	993	0.204237	0.220982
CTCCAA	3588	512	0.142698	0.154708
CTCTAA	1909	277	0.145102	0.164993
CTTCAA	2037	528	0.259205	0.316866
CTTTAA	1972	841	0.426471	0.550146
CTCCAC	5668	822	0.145025	0.156483
CTCTAC	2130	283	0.132864	0.153781
CTTCAC	2812	837	0.297653	0.345736
CTTTAC	1503	588	0.391218	0.458032
CTCCAT	3607	642	0.177987	0.210131
CTCTAT	1748	320	0.183066	0.194287
CTTCAT	2553	948	0.371328	0.499993
CTTTAT	1757	797	0.453614	0.570313
CTCCAG	9120	1053	0.115461	0.127801
CTCTAG	3637	441	0.121254	0.123632
CTTCAG	4406	1165	0.264412	0.320309
CTTTAG	1775	681	0.383662	0.474479
CTCCCA	8355	936	0.112029	0.118882
CTCTCA	4406	446	0.101226	0.114609
CTTCCA	4839	1171	0.241992	0.280617
CTTTCA	2983	817	0.273885	0.313627
CTCCCC	9809	1300	0.132531	0.142915
CTCTCC	8018	875	0.109129	0.115943
CTTCCC	8116	2402	0.295959	0.340494
CTTTCC	5470	1710	0.312614	0.362668
CTCCCT	9910	1399	0.141171	0.148502
CTCTCT	7255	809	0.111509	0.115631
CTTCCT	9105	2768	0.304009	0.362533
CTTTCT	4701	1373	0.292066	0.345105
CTCCCG	5611	430	0.0766352	0.0789745
CTCTCG	2071	161	0.0777402	0.0784946
CTTCCG	4366	966	0.221255	0.263062
CTTTCG	817	196	0.239902	0.268357
CTCCTA	2763	411	0.148751	0.157083
CTCTTA	2096	323	0.154103	0.187697
CTTCTA	1876	490	0.261194	0.293341
CTTTTA	1729	569	0.329092	0.387585
CTCCTC	10232	1647	0.160966	0.177489
CTCTTC	5099	729	0.142969	0.162176
CTTCTC	5173	1433	0.277015	0.312846
CTTTTC	3422	906	0.264757	0.30872
CTCCTT	5357	902	0.168378	0.181875
CTCTTT	3696	466	0.126082	0.13782
CTTCTT	3326	920	0.276609	0.298803
CTTTTT	2739	591	0.215772	0.256932
CTCCTG	8499	1063	0.125074	0.129918
CTCTTG	3811	453	0.118866	0.129437
CTTCTG	5883	1399	0.237804	0.271049
CTTTTG	2502	673	0.268985	0.313464
CTCCGA	1596	151	0.0946115	0.100761
CTCTGA	6352	506	0.0796599	0.0843477
CTTCGA	488	85	0.17418	0.213952
CTTTGA	2476	527	0.212843	0.245993
CTCCGC	6411	520	0.0811106	0.0879598
CTCTGC	9090	772	0.0849285	0.0904869
CTTCGC	1522	283	0.18594	0.215897
CTTTGC	3602	950	0.263742	0.306427
CTCCGT	1654	185	0.11185	0.121178
CTCTGT	5937	572	0.096345	0.101565
CTTCGT	762	188	0.246719	0.299102
CTTTGT	3043	853	0.280315	0.318176
CTCCGG	4069	255	0.062669	0.0680972
CTCTGG	8655	582	0.0672444	0.0668897
CTTCGG	1395	198	0.141935	0.169223
CTTTGG	3668	766	0.208833	0.23726
CGCCAA	1352	91	0.0673077	0.0687454
CGCTAA	538	34	0.063197	0.0630378
CGTCAA	583	33	0.0566038	0.0534915
CGTTAA	313	57	0.182109	0.232756
CGCCAC	3183	236	0.0741439	0.0768391
CGCTAC	780	47	0.0602564	0.0644004
CGTCAC	2413	153	0.0634065	0.0677027
CGTTAC	478	62	0.129707	0.138277
CGCCAT	1643	151	0.0919051	0.0981257
CGCTAT	487	39	0.0800821	0.0861662
CGTCAT	1315	107	0.0813688	0.0854593
CGTTAT	342	61	0.178363	0.21736
CGCCAG	3730	193	0.0517426	0.0517602
CGCTAG	1228	70	0.0570033	0.0554277
CGTCAG	1877	102	0.054342	0.0556808
CGTTAG	517	60	0.116054	0.118288
CGCCCA	4571	250	0.0546926	0.0595901
CGCTCA	1932	98	0.0507246	0.0492123
CGTCCA	1278	76	0.0594679	0.0685047
CGTTCA	641	75	0.117005	0.131601
CGCCCC	13219	746	0.0564339	0.0606673
CGCTCC	4752	214	0.0450337	0.0476453
CGTCCC	2638	164	0.0621683	0.0636346
CGTTCC	1504	146	0.0970745	0.110331
CGCCCT	5456	380	0.0696481	0.073975
CGCTCT	2865	147	0.0513089	0.0535816
CGTCCT	1791	115	0.0642099	0.0712938
CGTTCT	1010	86	0.0851485	0.0859041
CGCCCG	5963	201	0.0337079	0.0366026
CGCTCG	2305	68	0.0295011	0.0295113
CGTCCG	1480	49	0.0331081	0.0347381
CGTTCG	457	32	0.0700219	0.0652616
CGCCTA	1151	78	0.0677672	0.066708
CGCTTA	567	47	0.0828924	0.0761556
CGTCTA	497	26	0.0523139	0.0577416
CGTTTA	407	44	0.108108	0.116363
CGCCTC	6155	440	0.0714866	0.0748368
CGCTTC	2369	177	0.0747151	0.0767633
CGTCTC	1826	103	0.0564074	0.0543507
CGTTTC	1201	109	0.0907577	0.0925895
CGCCTT	2325	178	0.0765591	0.083637
CGCTTT	1209	92	0.0760959	0.081953
CGTCTT	965	77	0.0797927	0.0900995
CGTTTT	755	55	0.0728477	0.070283
CGCCTG	4676	231	0.0494012	0.0525323
CGCTTG	1295	84	0.0648649	0.0607043
CGTCTG	1811	77	0.0425179	0.0451526
CGTTTG	797	74	0.0928482	0.0943835
CGCCGA	1791	52	0.0290341	0.0315588
CGCTGA	2295	84	0.0366013	0.0378925
CGTCGA	320	13	0.040625	0.051636
CGTTGA	561	22	0.0392157	0.0377451
CGCCGC	8596	242	0.0281526	0.0287594
CGCTGC	4724	163	0.0345047	0.035015
CGTCGC	1447	49	0.0338632	0.0368885
CGTTGC	1143	67	0.0586177	0.0674892
CGCCGT	1623	77	0.047443	0.0464531
CGCTGT	2347	122	0.0519813	0.0552678
CGTCGT	473	26	0.0549683	0.0562941
CGTTGT	598	61	0.102007	0.108505
CGCCGG	5133	129	0.0251315	0.0252841
CGCTGG	3920	126	0.0321429	0.0336693
CGTCGG	1130	21	0.0185841	0.0200263
CGTTGG	992	51	0.0514113	0.05689
TACCAA	1302	136	0.104455	0.11975
TACTAA	1009	79	0.0782953	0.0841415
TATCAA	704	76	0.107955	0.119197
TATTAA	1013	213	0.210267	0.221555
TACCAC	2015	184	0.0913151	0.0949345
TACTAC	881	81	0.091941	0.108583
TATCAC	1076	160	0.148699	0.158333
TATTAC	1118	230	0.205725	0.231588
TACCAT	1529	169	0.11053	0.115393
TACTAT	957	91	0.0950888	0.0986892
TATCAT	1041	164	0.157541	0.173234
TATTAT	1151	236	0.205039	0.225748
TACCAG	2107	150	0.0711913	0.0747015
TACTAG	888	61	0.0686937	0.0685566
TATCAG	1253	161	0.128492	0.129643
TATTAG	1104	241	0.218297	0.228822
TACCCA	2109	154	0.0730204	0.0762594
TACTCA	3322	169	0.050873	0.0531173
TATCCA	1476	139	0.0941734	0.0962101
TATTCA	2009	282	0.140368	0.148614
TACCCC	1351	108	0.0799408	0.0854566
TACTCC	1774	94	0.0529876	0.0592325
TATCCC	1386	192	0.138528	0.151193
TATTCC	1590	233	0.146541	0.169198
TACCCT	1584	130	0.0820707	0.0905438
TACTCT	1770	100	0.0564972	0.0601189
TATCCT	1742	258	0.148106	0.16645
TATTCT	1681	238	0.141582	0.154942
TACCCG	739	55	0.0744249	0.0798193
TACTCG	434	22	0.0506912	0.0528517
TATCCG	389	33	0.0848329	0.0778364
TATTCG	235	26	0.110638	0.115912
TACCTA	640	56	0.0875	0.098748
TACTTA	1101	81	0.0735695	0.0754917
TATCTA	795	75	0.0943396	0.105698
TATTTA	1798	259	0.144049	0.153418
TACCTC	1559	153	0.0981398	0.0975511
TACTTC	1769	127	0.071792	0.0712005
TATCTC	1397	152	0.108805	0.11566
TATTTC	2418	332	0.137304	0.149944
TACCTT	826	74	0.0895884	0.0913581
TACTTT	1472	69	0.046875	0.048787
TATCTT	1274	160	0.125589	0.157035
TATTTT	2424	204	0.0841584	0.0870127
TACCTG	727	52	0.0715268	0.0720119
TACTTG	1497	83	0.0554442	0.0604266
TATCTG	1783	171	0.0959058	0.105836
TATTTG	1964	228	0.11609	0.126099
TACCGA	347	24	0.0691643	0.070347
TACTGA	2089	78	0.0373384	0.0359615
TATCGA	119	13	0.109244	0.148982
TATTGA	923	91	0.0985915	0.112829
TACCGC	842	46	0.0546318	0.0517086
TACTGC	2357	127	0.0538821	0.054396
TATCGC	357	35	0.0980392	0.111148
TATTGC	1385	133	0.0960289	0.0998758
TACCGT	367	37	0.100817	0.0963655
TACTGT	2003	118	0.0589116	0.0624618
TATCGT	209	29	0.138756	0.139308
TATTGT	1239	147	0.118644	0.133731
TACCGG	596	33	0.0553691	0.0759207
TACTGG	2403	88	0.0366209	0.0377924
TATCGG	217	19	0.0875576	0.0987797
TATTGG	1625	152	0.0935385	0.0996196
TCCCAA	3215	347	0.107932	0.11747
TCCTAA	1847	163	0.0882512	0.094591
TCTCAA	2420	370	0.152893	0.167602
TCTTAA	1540	465	0.301948	0.356461
TCCCAC	5100	645	0.126471	0.132855
TCCTAC	2025	182	0.0898765	0.0936969
TCTCAC	3319	649	0.195541	0.215821
TCTTAC	1670	473	0.283234	0.31338
TCCCAT	3440	526	0.152907	0.162713
TCCTAT	1741	200	0.114877	0.124727
TCTCAT	3244	750	0.231196	0.27154
TCTTAT	1451	494	0.340455	0.428838
TCCCAG	9710	947	0.0975283	0.101415
TCCTAG	2812	266	0.0945946	0.0977723
TCTCAG	5354	842	0.157266	0.167305
TCTTAG	2019	532	0.263497	0.297235
TCCCCA	6253	548	0.0876379	0.0905269
TCCTCA	4817	387	0.0803405	0.0842833
TCTCCA	5340	845	0.15824	0.165066
TCTTCA	2947	630	0.213777	0.232628
TCCCCC	5000	528	0.1056	0.118072
TCCTCC	10150	805	0.0793103	0.0832747
TCTCCC	6515	1202	0.184497	0.202062
TCTTCC	5640	1299	0.230319	0.2681
TCCCCT	5730	612	0.106806	0.112172
TCCTCT	6796	508	0.0747499	0.0762365
TCTCCT	6013	1244	0.206885	0.228316
TCTTCT	3888	877	0.225566	0.25294
TCCCCG	4594	341	0.0742273	0.0800541
TCCTCG	1943	120	0.0617602	0.063125
TCTCCG	2325	295	0.126882	0.13923
TCTTCG	818	133	0.162592	0.180386
TCCCTA	2435	298	0.122382	0.127991
TCCTTA	2148	220	0.102421	0.113399
TCTCTA	2414	445	0.184341	0.190206
TCTTTA	1936	525	0.271178	0.317639
TCCCTC	8008	1095	0.136738	0.151277
TCCTTC	5249	497	0.0946847	0.0998365
TCTCTC	5908	1170	0.198037	0.216404
TCTTTC	3830	960	0.250653	0.269881
TCCCTT	4556	681	0.149473	0.159212
TCCTTT	4315	347	0.0804171	0.0846303
TCTCTT	3903	888	0.227517	0.25422
TCTTTT	2997	677	0.225893	0.264376
TCCCTG	7968	832	0.104418	0.111601
TCCTTG	3850	322	0.0836364	0.0875732
TCTCTG	6920	1248	0.180347	0.198139
TCTTTG	3166	758	0.239419	0.264935
TCCCGA	1478	108	0.0730717	0.0907977
TCCTGA	5068	277	0.0546567	0.0576002
TCTCGA	553	54	0.0976492	0.110013
TCTTGA	2176	314	0.144301	0.162156
TCCCGC	5234	343	0.0655331	0.0730981
TCCTGC	7581	463	0.0610737	0.0628922
TCTCGC	1931	189	0.0978767	0.103887
TCTTGC	3117	470	0.150786	0.159541
TCCCGT	1413	139	0.0983723	0.098673
TCCTGT	5317	388	0.0729735	0.0781953
TCTCGT	726	99	0.136364	0.153793
TCTTGT	2378	416	0.174937	0.194037
TCCCGG	4671	277	0.0593021	0.0609365
TCCTGG	8452	432	0.0511122	0.053002
TCTCGG	1799	182	0.101167	0.112118
TCTTGG	3644	505	0.138584	0.144116
TTCCAA	3239	261	0.0805804	0.0802868
TTCTAA	1835	142	0.0773842	0.0779779
TTTCAA	2318	388	0.167386	0.192082
TTTTAA	2240	536	0.239286	0.279474
TTCCAC	3717	352	0.0947	0.101363
TTCTAC	1383	118	0.0853218	0.0867815
TTTCAC	2523	505	0.200159	0.233117
TTTTAC	1401	358	0.255532	0.3018
TTCCAT	3177	369	0.116147	0.127249
TTCTAT	1609	142	0.0882536	0.0892214
TTTCAT	2870	658	0.229268	0.263207
TTTTAT	2111	617	0.292279	0.332068
TTCCAG	6365	498	0.0782404	0.0828153
TTCTAG	2023	157	0.0776075	0.0805221
TTTCAG	3621	603	0.166529	0.185244
TTTTAG	1628	417	0.256143	0.314806
TTCCCA	6110	402	0.0657938	0.0654037
TTCTCA	4097	252	0.0615084	0.06604
TTTCCA	4376	665	0.151965	0.15633
TTTTCA	2903	468	0.161213	0.178688
TTCCCC	5315	434	0.0816557	0.0866694
TTCTCC	4969	297	0.0597706	0.0678841
TTTCCC	5469	1089	0.199122	0.212538
TTTTCC	4175	797	0.190898	0.216304
TTCCCT	6060	580	0.0957096	0.105379
TTCTCT	5077	299	0.058893	0.0605577
TTTCCT	6456	1281	0.19842	0.231576
TTTTCT	4133	662	0.160174	0.182954
TTCCCG	2804	194	0.0691869	0.0708447
TTCTCG	1081	55	0.0508788	0.0538904
TTTCCG	1822	285	0.156422	0.17486
TTTTCG	503	77	0.153082	0.137874
TTCCTA	2800	248	0.0885714	0.0907589
TTCTTA	2071	122	0.0589087	0.0583638
TTTCTA	2104	340	0.161597	0.190707
TTTTTA	2202	307	0.139419	0.148205
TTCCTC	6708	788	0.117472	0.12635
TTCTTC	3562	280	0.0786075	0.0859281
TTTCTC	4520	792	0.175221	0.188808
TTTTTC	3227	418	0.129532	0.147506
TTCCTT	5461	513	0.0939388	0.0979504
TTCTTT	3957	226	0.057114	0.0594268
TTTCTT	3942	640	0.162354	0.189316
TTTTTT	6702	445	0.0663981	0.0724448
TTCCTG	9008	723	0.080262	0.0824881
TTCTTG	2961	184	0.0621412	0.0650561
TTTCTG	4945	733	0.148231	0.165523
TTTTTG	2373	294	0.123894	0.136415
TTCCGA	912	51	0.0559211	0.059438
TTCTGA	4241	204	0.0481019	0.0486291
TTTCGA	362	47	0.129834	0.152071
TTTTGA	2159	299	0.13849	0.159218
TTCCGC	2538	151	0.0594957	0.0646496
TTCTGC	4412	216	0.0489574	0.0515586
TTTCGC	731	93	0.127223	0.130367
TTTTGC	2353	352	0.149596	0.162135
TTCCGT	1242	117	0.0942029	0.0999019
TTCTGT	3933	220	0.0559369	0.0594338
TTTCGT	450	63	0.14	0.147394
TTTTGT	2506	451	0.179968	0.2171
TTCCGG	3836	189	0.0492701	0.0510268
TTCTGG	4920	198	0.0402439	0.0422915
TTTCGG	701	84	0.119829	0.128478
TTTTGG	2135	276	0.129274	0.160413
TGCCAA	3222	202	0.062694	0.0705793
TGCTAA	2006	151	0.0752742	0.0786202
TGTCAA	1573	91	0.0578512	0.0583559
TGTTAA	1365	191	0.139927	0.14243
TGCCAC	4430	297	0.0670429	0.0693358
TGCTAC	1736	107	0.0616359	0.063634
TGTCAC	2791	165	0.0591186	0.0577941
TGTTAC	1511	185	0.122435	0.1499
TGCCAT	3498	252	0.0720412	0.0731615
TGCTAT	1978	147	0.0743175	0.0759106
TGTCAT	3353	280	0.0835073	0.0872965
TGTTAT	1558	235	0.150834	0.162848
TGCCAG	6046	339	0.0560701	0.0598829
TGCTAG	2085	124	0.0594724	0.0626801
TGTCAG	3747	221	0.0589805	0.0613896
TGTTAG	1720	195	0.113372	0.119193
TGCCCA	5617	260	0.0462881	0.0484268
TGCTCA	4659	273	0.0585963	0.0620445
TGTCCA	3535	236	0.066761	0.0702446
TGTTCA	2433	209	0.0859022	0.0851342
TGCCCC	5894	351	0.0595521	0.0621241
TGCTCC	5331	301	0.0564622	0.0585375
TGTCCC	3396	241	0.0709658	0.0700728
TGTTCC	2905	328	0.112909	0.122233
TGCCCT	6376	436	0.0683814	0.0737546
TGCTCT	5397	264	0.0489161	0.0509796
TGTCCT	3896	303	0.0777721	0.083552
TGTTCT	3205	318	0.09922	0.10376
TGCCCG	2792	110	0.0393983	0.0428757
TGCTCG	1319	66	0.0500379	0.0506051
TGTCCG	1150	43	0.0373913	0.0395058
TGTTCG	503	34	0.0675944	0.063151
TGCCTA	2220	141	0.0635135	0.0649142
TGCTTA	2203	179	0.0812528	0.089217
TGTCTA	1635	112	0.0685015	0.0711921
TGTTTA	2479	285	0.114966	0.123581
TGCCTC	5734	420	0.0732473	0.0769643
TGCTTC	4184	323	0.0771989	0.0865562
TGTCTC	4116	306	0.074344	0.0780682
TGTTTC	3382	347	0.102602	0.106299
TGCCTT	4197	376	0.0895878	0.0877776
TGCTTT	3680	269	0.0730978	0.0791891
TGTCTT	3052	265	0.0868283	0.089148
TGTTTT	3270	288	0.0880734	0.0907418
TGCCTG	7700	426	0.0553247	0.0566868
TGCTTG	3328	219	0.0658053	0.0699094
TGTCTG	4810	311	0.064657	0.0658955
TGTTTG	3011	262	0.0870143	0.0940871
TGCCGA	1011	25	0.024728	0.0281008
TGCTGA	5835	232	0.0397601	0.0398998
TGTCGA	327	14	0.0428135	0.0411062
TGTTGA	2375	161	0.0677895	0.0691179
TGCCGC	2815	109	0.0387211	0.0393672
TGCTGC	6966	256	0.0367499	0.0371274
TGTCGC	849	34	0.0400471	0.0384887
TGTTGC	2767	148	0.0534875	0.0542602
TGCCGT	1150	75	0.0652174	0.0644984
TGCTGT	5364	271	0.050522	0.0539453
TGTCGT	557	32	0.0574506	0.0614417
TGTTGT	2346	205	0.0873828	0.0985444
TGCCGG	2785	83	0.0298025	0.0303615
TGCTGG	8166	246	0.0301249	0.0304457
TGTCGG	962	35	0.0363825	0.0392577
TGTTGG	2823	190	0.0673043	0.0691751
GACCAA	2409	206	0.0855127	0.0898606
GACTAA	2781	242	0.0870191	0.0931444
GATCAA	840	86	0.102381	0.108695
GATTAA	1079	187	0.173309	0.193498
GACCAC	2979	225	0.0755287	0.0779067
GACTAC	1692	114	0.0673759	0.065239
GATCAC	1572	194	0.12341	0.13371
GATTAC	1174	172	0.146508	0.15925
GACCAT	1551	142	0.0915538	0.0999996
GACTAT	1141	103	0.0902717	0.0962298
GATCAT	1332	173	0.12988	0.144651
GATTAT	991	159	0.160444	0.205545
GACCAG	3603	215	0.0596725	0.0633455
GACTAG	1529	116	0.0758666	0.0845546
GATCAG	1815	172	0.0947658	0.100166
GATTAG	1113	190	0.17071	0.175868
GACCCA	2952	168	0.0569106	0.0658892
GACTCA	12310	680	0.0552396	0.0585293
GATCCA	1706	132	0.077374	0.0808133
GATTCA	3907	425	0.108779	0.115916
GACCCC	2221	152	0.0684376	0.079098
GACTCC	3911	210	0.0536947	0.0564512
GATCCC	2099	195	0.0929014	0.0947971
GATTCC	2651	285	0.107507	0.123155
GACCCT	1967	121	0.061515	0.063864
GACTCT	3224	174	0.0539702	0.0560376
GATCCT	1959	190	0.0969883	0.0998837
GATTCT	2159	200	0.0926355	0.0961413
GACCCG	2159	89	0.0412228	0.0423221
GACTCG	1304	58	0.0444785	0.0440677
GATCCG	923	66	0.071506	0.0751417
GATTCG	486	50	0.102881	0.117229
GACCTA	1166	73	0.0626072	0.0621714
GACTTA	1307	96	0.0734507	0.0742333
GATCTA	834	73	0.08753	0.103974
GATTTA	1105	144	0.130317	0.156915
GACCTC	3134	234	0.074665	0.0818795
GACTTC	2826	167	0.0590941	0.0591615
GATCTC	1881	187	0.0994152	0.11192
GATTTC	2113	202	0.0955987	0.102599
GACCTT	1751	161	0.0919475	0.090398
GACTTT	1986	95	0.0478348	0.051615
GATCTT	1338	123	0.0919283	0.0984987
GATTTT	1683	137	0.0814023	0.0831438
GACCTG	2986	175	0.0586068	0.0605507
GACTTG	2416	163	0.0674669	0.072879
GATCTG	2404	184	0.0765391	0.0782009
GATTTG	1652	142	0.0859564	0.0907294
GACCGA	785	29	0.0369427	0.0407253
GACTGA	3404	148	0.0434783	0.043951
GATCGA	242	14	0.0578512	0.0547306
GATTGA	1155	95	0.0822511	0.0946154
GACCGC	1946	74	0.0380267	0.0376278
GACTGC	3603	158	0.0438523	0.0452724
GATCGC	727	33	0.045392	0.0433913
GATTGC	1572	134	0.0852417	0.0894829
GACCGT	710	44	0.0619718	0.0666759
GACTGT	3027	163	0.0538487	0.0542705
GATCGT	272	33	0.121324	0.129138
GATTGT	1304	137	0.105061	0.112515
GACCGG	1706	48	0.028136	0.0297064
GACTGG	4149	176	0.0424199	0.0478626
GATCGG	509	24	0.0471513	0.0528905
GATTGG	3817	329	0.0861933	0.0924115
GCCCAA	3177	365	0.114888	0.12754
GCCTAA	1524	150	0.0984252	0.103241
GCTCAA	2307	410	0.17772	0.207777
GCTTAA	1389	429	0.308855	0.35771
GCCCAC	5118	639	0.124853	0.133129
GCCTAC	1833	200	0.109111	0.118001
GCTCAC	4065	849	0.208856	0.236634
GCTTAC	1356	433	0.319322	0.378401
GCCCAT	2899	461	0.15902	0.181398
GCCTAT	1557	202	0.129737	0.143826
GCTCAT	3189	836	0.262151	0.318959
GCTTAT	1288	501	0.388975	0.505146
GCCCAG	10711	1008	0.0941089	0.10076
GCCTAG	2765	262	0.0947559	0.10028
GCTCAG	7009	1236	0.176345	0.195496
GCTTAG	2238	657	0.293566	0.353208
GCCCCA	7359	632	0.0858812	0.0945533
GCCTCA	5183	407	0.078526	0.0827943
GCTCCA	5772	926	0.16043	0.173877
GCTTCA	3077	660	0.214495	0.245915
GCCCCC	8990	915	0.10178	0.111233
GCCTCC	10269	818	0.0796572	0.0855902
GCTCCC	8158	1428	0.175043	0.201549
GCTTCC	6889	1533	0.222529	0.250271
GCCCCT	7377	933	0.126474	0.135982
GCCTCT	7062	573	0.0811385	0.0827797
GCTCCT	6499	1473	0.22665	0.264257
GCTTCT	4505	1109	0.246171	0.27753
GCCCCG	10941	694	0.0634311	0.0678226
GCCTCG	3406	168	0.0493247	0.0545414
GCTCCG	5092	570	0.11194	0.127322
GCTTCG	1284	194	0.15109	0.190716
GCCCTA	2259	272	0.120407	0.131643
GCCTTA	1890	205	0.108466	0.111575
GCTCTA	2120	405	0.191038	0.209358
GCTTTA	1724	490	0.284223	0.337046
GCCCTC	8395	1115	0.132817	0.146403
GCCTTC	4757	512	0.107631	0.116252
GCTCTC	5270	1048	0.198861	0.225393
GCTTTC	3436	899	0.261641	0.299792
GCCCTT	3947	617	0.156321	0.177534
GCCTTT	3441	377	0.109561	0.118516
GCTCTT	3575	869	0.243077	0.262386
GCTTTT	2589	569	0.219776	0.258867
GCCCTG	9595	985	0.102658	0.108806
GCCTTG	4406	415	0.0941897	0.10032
GCTCTG	8664	1425	0.164474	0.181995
GCTTTG	3592	890	0.247773	0.29281
GCCCGA	2131	136	0.0638198	0.0682256
GCCTGA	5453	323	0.0592334	0.0630718
GCTCGA	770	90	0.116883	0.124162
GCTTGA	2093	318	0.151935	0.158549
GCCCGC	7327	402	0.0548656	0.0575954
GCCTGC	8425	482	0.0572107	0.0615414
GCTCGC	2966	273	0.0920432	0.10451
GCTTGC	3041	473	0.155541	0.168233
GCCCGT	1540	121	0.0785714	0.0815418
GCCTGT	5068	349	0.0688635	0.0724229
GCTCGT	931	152	0.163265	0.207724
GCTTGT	2422	500	0.206441	0.224196
GCCCGG	7147	304	0.0425353	0.0443702
GCCTGG	10686	544	0.0509077	0.053936
GCTCGG	3245	252	0.0776579	0.0864458
GCTTGG	4113	520	0.126428	0.136736
GTCCAA	1797	177	0.0984975	0.106663
GTCTAA	1110	112	0.100901	0.103426
GTTCAA	1232	224	0.181818	0.195997
GTTTAA	1354	344	0.254062	0.306432
GTCCAC	2472	274	0.110841	0.129352
GTCTAC	1022	95	0.092955	0.0961501
GTTCAC	1721	353	0.205113	0.263137
GTTTAC	1432	357	0.249302	0.290705
GTCCAT	1666	235	0.141056	0.154866
GTCTAT	1066	134	0.125704	0.140052
GTTCAT	1522	334	0.219448	0.241094
GTTTAT	1597	465	0.291171	0.349377
GTCCAG	4073	318	0.0780751	0.0808379
GTCTAG	1493	137	0.0917616	0.100824
GTTCAG	2500	445	0.178	0.190392
GTTTAG	1448	371	0.256215	0.292981
GTCCCA	3418	242	0.0708016	0.0757583
GTCTCA	2976	193	0.0648522	0.071423
GTTCCA	2480	373	0.150403	0.172206
GTTTCA	2443	352	0.144085	0.152859
GTCCCC	3596	337	0.0937152	0.104984
GTCTCC	4244	308	0.072573	0.0748639
GTTCCC	3485	678	0.194548	0.225056
GTTTCC	3998	713	0.178339	0.189603
GTCCCT	3740	349	0.0933155	0.104957
GTCTCT	3742	279	0.0745591	0.0781069
GTTCCT	3316	672	0.202654	0.229809
GTTTCT	3279	552	0.168344	0.179705
GTCCCG	2982	170	0.0570087	0.059815
GTCTCG	1159	65	0.0560828	0.0564375
GTTCCG	1524	193	0.12664	0.144818
GTTTCG	534	62	0.116105	0.110322
GTCCTA	1412	138	0.0977337	0.0967489
GTCTTA	1267	100	0.0789266	0.0853928
GTTCTA	1303	210	0.161167	0.187523
GTTTTA	1532	275	0.179504	0.204857
GTCCTC	3606	424	0.117582	0.126531
GTCTTC	2564	228	0.0889236	0.0927528
GTTCTC	2779	445	0.16013	0.166934
GTTTTC	2733	382	0.139773	0.156152
GTCCTT	2371	289	0.121889	0.140833
GTCTTT	2170	175	0.0806452	0.0797082
GTTCTT	2103	376	0.178792	0.202081
GTTTTT	2104	236	0.112167	0.111045
GTCCTG	4773	422	0.088414	0.0957019
GTCTTG	2296	180	0.0783972	0.084483
GTTCTG	3384	464	0.137116	0.159142
GTTTTG	2239	323	0.144261	0.161932
GTCCGA	682	33	0.0483871	0.054924
GTCTGA	3148	157	0.0498729	0.0493073
GTTCGA	358	39	0.108939	0.119752
GTTTGA	1673	217	0.129707	0.133286
GTCCGC	2079	119	0.0572391	0.0636134
GTCTGC	3562	195	0.0547445	0.0590634
GTTCGC	731	80	0.109439	0.114034
GTTTGC	2217	334	0.150654	0.166824
GTCCGT	807	76	0.094176	0.110227
GTCTGT	3113	177	0.0568583	0.0613548
GTTCGT	409	70	0.171149	0.18142
GTTTGT	2196	367	0.167122	0.196659
GTCCGG	1871	64	0.0342063	0.0362625
GTCTGG	4305	177	0.041115	0.0440805
GTTCGG	765	85	0.111111	0.119837
GTTTGG	2505	342	0.136527	0.153078
GGCCAA	4385	258	0.0588369	0.060406
GGCTAA	1712	121	0.0706776	0.073903
GGTCAA	1449	88	0.0607315	0.0626075
GGTTAA	1251	154	0.123102	0.130434
GGCCAC	6236	415	0.0665491	0.0698287
GGCTAC	2030	119	0.0586207	0.0650686
GGTCAC	2966	179	0.0603506	0.0641475
GGTTAC	1316	144	0.109422	0.126421
GGCCAT	2931	263	0.0897305	0.0933109
GGCTAT	1481	124	0.0837272	0.0848769
GGTCAT	2115	156	0.0737589	0.0787576
GGTTAT	1145	138	0.120524	0.135811
GGCCAG	8541	456	0.0533895	0.055463
GGCTAG	2267	117	0.0516101	0.0542637
GGTCAG	3970	177	0.0445844	0.0461347
GGTTAG	1530	163	0.106536	0.107021
GGCCCA	5531	274	0.049539	0.0521567
GGCTCA	4997	231	0.0462277	0.0481028
GGTCCA	2147	134	0.0624127	0.0632044
GGTTCA	1727	137	0.0793283	0.0950939
GGCCCC	8622	435	0.0504523	0.0530163
GGCTCC	8822	382	0.0433008	0.0450583
GGTCCC	3636	196	0.0539054	0.0543149
GGTTCC	3115	276	0.0886035	0.0904128
GGCCCT	6049	395	0.0653	0.0656757
GGCTCT	6048	295	0.0487765	0.0526891
GGTCCT	2870	161	0.0560976	0.0571517
GGTTCT	2483	199	0.080145	0.0906733
GGCCCG	5480	169	0.0308394	0.032814
GGCTCG	2719	74	0.0272159	0.0264849
GGTCCG	1535	49	0.0319218	0.030923
GGTTCG	734	45	0.0613079	0.0630848
GGCCTA	2081	131	0.0629505	0.0657469
GGCTTA	1884	141	0.0748408	0.0777735
GGTCTA	1111	69	0.0621062	0.0583015
GGTTTA	1408	146	0.103693	0.1058
GGCCTC	7169	511	0.0712791	0.0731831
GGCTTC	5061	345	0.0681683	0.0726249
GGTCTC	2732	161	0.0589312	0.0628019
GGTTTC	2947	232	0.0787241	0.0834134
GGCCTT	3890	288	0.074036	0.079372
GGCTTT	3487	236	0.06768	0.0671335
GGTCTT	1842	111	0.0602606	0.0653509
GGTTTT	2432	185	0.0760691	0.0785386
GGCCTG	8940	413	0.0461969	0.0483187
GGCTTG	3840	204	0.053125	0.0550046
GGTCTG	3574	162	0.0453274	0.0466434
GGTTTG	2593	168	0.0647898	0.0675599
GGCCGA	2524	79	0.0312995	0.03271
GGCTGA	6912	237	0.0342882	0.0357218
GGTCGA	473	19	0.0401691	0.0386373
GGTTGA	1845	131	0.0710027	0.0746739
GGCCGC	7564	202	0.0267054	0.0283757
GGCTGC	9745	311	0.0319138	0.0331563
GGTCGC	1464	51	0.0348361	0.0350126
GGTTGC	2422	130	0.0536746	0.0541191
GGCCGT	1944	79	0.0406379	0.0400358
GGCTGT	5707	259	0.0453829	0.0454339
GGTCGT	519	27	0.0520231	0.0648559
GGTTGT	1765	134	0.0759207	0.0815344
GGCCGG	7408	200	0.0269978	0.0284326
GGCTGG	11492	319	0.0277584	0.0282086
GGTCGG	1610	32	0.0198758	0.0207358
GGTTGG	3189	144	0.0451552	0.0450118

## Sheet: 3_64PP_cellDNA_6mer
seq	kmer_count	damage_count	mean	var
AACCAA	2604	126	0.0483871	0.0691138
AACTAA	1145	5	0.00436681	0.0060998
AATCAA	1461	48	0.0328542	0.0523445
AATTAA	800	18	0.0225	0.0320338
AACCAC	4021	38	0.00945039	0.0108559
AACTAC	1494	8	0.00535475	0.00666923
AATCAC	2945	59	0.020034	0.0284708
AATTAC	1201	15	0.0124896	0.0123439
AACCAT	1818	18	0.00990099	0.0109091
AACTAT	1236	8	0.00647249	0.0112941
AATCAT	2871	50	0.0174155	0.0206025
AATTAT	1017	10	0.00983284	0.0117142
AACCAG	3310	58	0.0175227	0.0244738
AACTAG	1167	6	0.00514139	0.00511934
AATCAG	3456	110	0.0318287	0.0383499
AATTAG	1003	16	0.0159521	0.0177093
AACCCA	2752	22	0.00799419	0.00866017
AACTCA	2643	16	0.00605373	0.00753336
AATCCA	2210	40	0.0180995	0.0241177
AATTCA	1997	17	0.00851277	0.0104485
AACCCC	2557	23	0.00899492	0.0120474
AACTCC	2915	17	0.0058319	0.00785891
AATCCC	2937	66	0.0224719	0.0362796
AATTCC	3669	20	0.00545108	0.00705861
AACCCT	2591	22	0.00849093	0.0145997
AACTCT	2485	9	0.00362173	0.00441522
AATCCT	2563	50	0.0195084	0.0269417
AATTCT	2601	8	0.00307574	0.00460592
AACCCG	1386	19	0.0137085	0.0164184
AACTCG	691	5	0.00723589	0.00719394
AATCCG	757	19	0.0250991	0.032438
AATTCG	354	2	0.00564972	0.00563371
AACCTA	1081	9	0.00832562	0.0119677
AACTTA	1017	2	0.00196657	0.00196463
AATCTA	1001	9	0.00899101	0.00891908
AATTTA	1284	2	0.00155763	0.00155642
AACCTC	2709	11	0.00406054	0.0047841
AACTTC	2271	8	0.00352268	0.00439287
AATCTC	2011	17	0.00845351	0.00938124
AATTTC	2100	11	0.0052381	0.00807164
AACCTT	1491	7	0.00469484	0.00870278
AACTTT	1614	7	0.00433705	0.00928062
AATCTT	1599	11	0.0068793	0.00933938
AATTTT	1782	6	0.003367	0.00335755
AACCTG	2210	11	0.00497738	0.00495484
AACTTG	1795	4	0.00222841	0.00222469
AATCTG	2536	23	0.0090694	0.0105686
AATTTG	1709	6	0.00351083	0.00350055
AACCGA	611	10	0.0163666	0.0194038
AACTGA	2550	5	0.00196078	0.00195771
AATCGA	297	7	0.023569	0.0230913
AATTGA	1013	6	0.005923	0.00787002
AACCGC	1313	11	0.00837776	0.0098383
AACTGC	3056	11	0.00359948	0.00358769
AATCGC	714	14	0.0196078	0.0192503
AATTGC	1524	11	0.00721785	0.00848365
AACCGT	575	3	0.00521739	0.00519921
AACTGT	2353	4	0.00169996	0.00169779
AATCGT	354	6	0.0169492	0.0280405
AATTGT	1292	3	0.00232198	0.00231838
AACCGG	1163	16	0.0137575	0.0170223
AACTGG	2862	13	0.00454228	0.00592134
AATCGG	657	12	0.0182648	0.0210074
AATTGG	1389	16	0.0115191	0.0171583
ACCCAA	2353	100	0.0424989	0.0832271
ACCTAA	1008	5	0.00496032	0.00494061
ACTCAA	2800	205	0.0732143	0.0928871
ACTTAA	1343	52	0.0387193	0.0581122
ACCCAC	3707	115	0.0310224	0.0435597
ACCTAC	1226	7	0.00570962	0.00568166
ACTCAC	6716	414	0.0616438	0.0733402
ACTTAC	1272	45	0.0353774	0.0451676
ACCCAT	1977	50	0.0252908	0.0277001
ACCTAT	742	7	0.00943396	0.0174547
ACTCAT	6420	326	0.0507788	0.0672139
ACTTAT	1040	25	0.0240385	0.029258
ACCCAG	5926	173	0.0291934	0.0361096
ACCTAG	1665	8	0.0048048	0.00598652
ACTCAG	8136	518	0.0636676	0.0878943
ACTTAG	1746	62	0.0355097	0.0468759
ACCCCA	3724	75	0.0201396	0.0283345
ACCTCA	3275	29	0.00885496	0.010001
ACTCCA	3968	166	0.0418347	0.0542111
ACTTCA	2508	67	0.0267145	0.0411688
ACCCCC	3153	50	0.0158579	0.020053
ACCTCC	4409	38	0.00861873	0.0121762
ACTCCC	4624	277	0.0599048	0.0883423
ACTTCC	6023	160	0.0265648	0.0344984
ACCCCT	3139	56	0.0178401	0.0289997
ACCTCT	3162	15	0.00474383	0.00535553
ACTCCT	3889	200	0.0514271	0.0688566
ACTTCT	2863	50	0.0174642	0.0283462
ACCCCG	2532	51	0.0201422	0.0260659
ACCTCG	1237	10	0.00808407	0.0144977
ACTCCG	1745	87	0.0498567	0.0955633
ACTTCG	666	21	0.0315315	0.0666734
ACCCTA	1391	17	0.0122214	0.0135196
ACCTTA	844	3	0.0035545	0.00354607
ACTCTA	1524	40	0.0262467	0.034767
ACTTTA	1371	15	0.0109409	0.012289
ACCCTC	3503	32	0.00913503	0.0113386
ACCTTC	1975	12	0.00607595	0.0100948
ACTCTC	3134	97	0.0309509	0.0504302
ACTTTC	2362	24	0.0101609	0.0117561
ACCCTT	2030	24	0.0118227	0.0126744
ACCTTT	1299	7	0.00538876	0.00844552
ACTCTT	2435	52	0.0213552	0.0266596
ACTTTT	1857	17	0.00915455	0.0101532
ACCCTG	4573	47	0.0102777	0.0154237
ACCTTG	1902	13	0.00683491	0.00784384
ACTCTG	4885	104	0.0212897	0.0286212
ACTTTG	2340	34	0.0145299	0.0194553
ACCCGA	992	33	0.0332661	0.0422828
ACCTGA	1687	5	0.00296384	0.00295681
ACTCGA	511	33	0.0645793	0.0958213
ACTTGA	1913	34	0.0177731	0.0258346
ACCCGC	2458	43	0.0174939	0.0228929
ACCTGC	2837	18	0.00634473	0.00771713
ACTCGC	1344	78	0.0580357	0.0934276
ACTTGC	2128	36	0.0169173	0.0204001
ACCCGT	756	10	0.0132275	0.0157188
ACCTGT	1336	9	0.00673653	0.00669616
ACTCGT	532	24	0.0451128	0.0582247
ACTTGT	1704	25	0.0146714	0.0203366
ACCCGG	2691	35	0.0130063	0.0150724
ACCTGG	2908	14	0.00481431	0.00616876
ACTCGG	1484	68	0.0458221	0.0612839
ACTTGG	2926	64	0.0218729	0.0302906
ATCCAA	1786	47	0.0263158	0.0312399
ATCTAA	1058	7	0.00661626	0.010363
ATTCAA	1910	74	0.0387435	0.0487863
ATTTAA	1547	49	0.0316742	0.056564
ATCCAC	2226	22	0.0098832	0.0115877
ATCTAC	1140	4	0.00350877	0.00525546
ATTCAC	2801	104	0.0371296	0.0443352
ATTTAC	1413	18	0.0127389	0.0154183
ATCCAT	1763	23	0.0130459	0.0174234
ATCTAT	976	5	0.00512295	0.00510193
ATTCAT	3638	116	0.0318857	0.0385761
ATTTAT	1921	44	0.0229047	0.0390584
ATCCAG	3197	29	0.009071	0.00961732
ATCTAG	1461	7	0.00479124	0.00888114
ATTCAG	3367	150	0.04455	0.0651567
ATTTAG	1357	30	0.0221076	0.0245846
ATCCCA	3542	30	0.00846979	0.00896524
ATCTCA	2819	5	0.00177368	0.00177116
ATTCCA	4938	98	0.0198461	0.0251276
ATTTCA	2984	33	0.011059	0.0129517
ATCCCC	2833	32	0.0112954	0.0139967
ATCTCC	2890	17	0.00588235	0.00584978
ATTCCC	3394	120	0.0353565	0.0464949
ATTTCC	4511	62	0.0137442	0.0148887
ATCCCT	3270	22	0.00672783	0.00729642
ATCTCT	3049	12	0.00393572	0.00392151
ATTCCT	5252	113	0.0215156	0.0256273
ATTTCT	3450	25	0.00724638	0.00777583
ATCCCG	1376	12	0.00872093	0.0101057
ATCTCG	693	5	0.00721501	0.0100635
ATTCCG	860	16	0.0186047	0.0182798
ATTTCG	395	3	0.00759494	0.00755638
ATCCTA	1466	9	0.00613915	0.00610563
ATCTTA	1204	8	0.00664452	0.00826837
ATTCTA	1598	23	0.014393	0.0166994
ATTTTA	1870	13	0.00695187	0.00690724
ATCCTC	3202	20	0.0062461	0.00870824
ATCTTC	1991	11	0.00552486	0.00851217
ATTCTC	2855	49	0.0171629	0.0224804
ATTTTC	2338	10	0.00427716	0.00426069
ATCCTT	2388	8	0.00335008	0.00417813
ATCTTT	2020	11	0.00544554	0.0123527
ATTCTT	3273	43	0.0131378	0.0190816
ATTTTT	3021	21	0.00695134	0.0108788
ATCCTG	4155	16	0.00385078	0.00528127
ATCTTG	2198	11	0.00500455	0.0058921
ATTCTG	3338	42	0.0125824	0.0154245
ATTTTG	2032	14	0.00688976	0.0078304
ATCCGA	528	4	0.00757576	0.00753263
ATCTGA	2818	3	0.00106458	0.00106383
ATTCGA	286	7	0.0244755	0.0239603
ATTTGA	1764	16	0.00907029	0.0135308
ATCCGC	1022	5	0.00489237	0.0048732
ATCTGC	3024	8	0.0026455	0.00462416
ATTCGC	516	18	0.0348837	0.0376157
ATTTGC	2121	27	0.0127298	0.0201209
ATCCGT	543	5	0.0092081	0.0128302
ATCTGT	2606	5	0.00191865	0.0019157
ATTCGT	383	12	0.0313316	0.0461362
ATTTGT	2192	19	0.00866788	0.0149864
ATCCGG	1262	9	0.00713154	0.0150165
ATCTGG	3140	13	0.00414013	0.00539859
ATTCGG	522	17	0.032567	0.0354057
ATTTGG	2001	17	0.00849575	0.00942779
AGCCAA	5205	334	0.0641691	0.0988792
AGCTAA	1768	14	0.00791855	0.0214426
AGTCAA	2478	41	0.0165456	0.0219304
AGTTAA	1302	16	0.0122888	0.0136844
AGCCAC	5652	88	0.0155697	0.0181614
AGCTAC	1915	7	0.00365535	0.00364389
AGTCAC	7128	103	0.0144501	0.0195751
AGTTAC	1400	11	0.00785714	0.00923057
AGCCAT	3295	25	0.00758725	0.00813914
AGCTAT	1853	9	0.00485699	0.00483601
AGTCAT	7507	96	0.0127881	0.0158237
AGTTAT	1383	7	0.00506146	0.00938102
AGCCAG	8153	117	0.0143505	0.0170904
AGCTAG	2191	8	0.0036513	0.00546611
AGTCAG	7188	98	0.0136338	0.0170675
AGTTAG	1435	14	0.0097561	0.0124571
AGCCCA	6164	64	0.0103829	0.0115748
AGCTCA	4931	37	0.00750355	0.0163737
AGTCCA	3070	61	0.0198697	0.0286047
AGTTCA	2180	24	0.0110092	0.0154822
AGCCCC	6928	72	0.0103926	0.0125959
AGCTCC	6560	48	0.00731707	0.00848434
AGTCCC	4115	74	0.017983	0.0230115
AGTTCC	3274	19	0.0058033	0.00577138
AGCCCT	6298	48	0.00762147	0.00883503
AGCTCT	5279	34	0.00644061	0.008295
AGTCCT	3630	57	0.0157025	0.0209713
AGTTCT	2859	14	0.00489682	0.00557433
AGCCCG	3904	37	0.00947746	0.0114397
AGCTCG	1549	9	0.0058102	0.00578017
AGTCCG	1282	15	0.0117005	0.0146952
AGTTCG	561	2	0.00356506	0.0035587
AGCCTA	2228	33	0.0148115	0.019089
AGCTTA	1592	9	0.00565327	0.00562484
AGTCTA	1442	9	0.00624133	0.00620668
AGTTTA	1507	12	0.00796284	0.0105607
AGCCTC	6886	52	0.00755155	0.00865756
AGCTTC	4039	27	0.00668482	0.0101088
AGTCTC	3459	25	0.00722752	0.00891247
AGTTTC	2710	15	0.00553506	0.00772129
AGCCTT	4059	16	0.00394186	0.00491299
AGCTTT	2914	12	0.00411805	0.00478908
AGTCTT	2450	17	0.00693878	0.00852676
AGTTTT	2120	6	0.00283019	0.00282351
AGCCTG	8374	70	0.00835921	0.0111567
AGCTTG	3203	16	0.00499532	0.00497192
AGTCTG	3957	37	0.00935052	0.0133099
AGTTTG	2147	11	0.00512343	0.00603152
AGCCGA	1880	19	0.0101064	0.011074
AGCTGA	5718	24	0.00419727	0.00522989
AGTCGA	460	7	0.0152174	0.0280904
AGTTGA	1762	10	0.00567537	0.00678208
AGCCGC	4482	35	0.00780901	0.00998141
AGCTGC	7142	35	0.00490059	0.00571747
AGTCGC	1080	20	0.0185185	0.0256067
AGTTGC	2242	9	0.00401427	0.00578486
AGCCGT	1285	19	0.014786	0.017694
AGCTGT	4971	24	0.004828	0.00641532
AGTCGT	617	9	0.0145867	0.0143973
AGTTGT	1985	5	0.00251889	0.00352188
AGCCGG	4203	37	0.00880324	0.0106317
AGCTGG	7864	40	0.00508647	0.00735044
AGTCGG	1272	7	0.00550314	0.00705073
AGTTGG	2421	12	0.00495663	0.0049341
CACCAA	3098	198	0.0639122	0.108927
CACTAA	1563	14	0.00895713	0.010163
CATCAA	1837	112	0.060969	0.0768908
CATTAA	1341	47	0.0350485	0.060711
CACCAC	5325	158	0.0296714	0.0393148
CACTAC	1628	18	0.0110565	0.0121702
CATCAC	3779	176	0.0465732	0.057121
CATTAC	1774	36	0.0202931	0.0221486
CACCAT	3175	82	0.0258268	0.0365098
CACTAT	1450	14	0.00965517	0.0150896
CATCAT	3202	154	0.0480949	0.0607914
CATTAT	1392	28	0.0201149	0.0254758
CACCAG	6353	178	0.0280183	0.0338496
CACTAG	3072	18	0.00585938	0.00843195
CATCAG	3993	202	0.0505885	0.0680814
CATTAG	1754	49	0.0279361	0.0351575
CACCCA	5874	85	0.0144705	0.0190312
CACTCA	4626	42	0.00907912	0.0102959
CATCCA	3623	141	0.038918	0.0506661
CATTCA	3502	55	0.0157053	0.0194619
CACCCC	6331	96	0.0151635	0.0234667
CACTCC	5065	33	0.0065153	0.00726402
CATCCC	4724	192	0.0406435	0.0580556
CATTCC	6329	70	0.0110602	0.0144162
CACCCT	5349	76	0.0142083	0.0166268
CACTCT	4289	25	0.00582886	0.00719549
CATCCT	5103	175	0.0342936	0.0456681
CATTCT	4555	44	0.00965971	0.0157169
CACCCG	2575	35	0.0135922	0.0172977
CACTCG	1285	10	0.0077821	0.00772755
CATCCG	1323	48	0.0362812	0.0455813
CATTCG	596	8	0.0134228	0.0132649
CACCTA	1754	21	0.0119726	0.0141178
CACTTA	1841	3	0.00162955	0.00162778
CATCTA	2031	28	0.0137863	0.0214847
CATTTA	1992	24	0.0120482	0.0179361
CACCTC	4628	44	0.00950735	0.011148
CACTTC	5002	21	0.00419832	0.00538129
CATCTC	4208	61	0.0144962	0.0166664
CATTTC	4688	59	0.0125853	0.0171234
CACCTT	1966	16	0.00813835	0.00909404
CACTTT	2801	15	0.00535523	0.00604274
CATCTT	3249	41	0.0126193	0.0143111
CATTTT	3362	19	0.0056514	0.00562113
CACCTG	2852	34	0.0119215	0.013888
CACTTG	2870	11	0.00383275	0.00381939
CATCTG	4939	72	0.0145778	0.0180134
CATTTG	2739	24	0.00876232	0.0145324
CACCGA	1094	15	0.0137112	0.0153654
CACTGA	4905	22	0.00448522	0.00446601
CATCGA	419	11	0.026253	0.0351943
CATTGA	1738	21	0.0120829	0.0165494
CACCGC	3716	64	0.0172228	0.0239294
CACTGC	6788	39	0.00574543	0.00836539
CATCGC	1135	34	0.0299559	0.0361389
CATTGC	3007	45	0.0149651	0.0247261
CACCGT	1277	16	0.0125294	0.0123821
CACTGT	4750	21	0.00442105	0.00524472
CATCGT	707	22	0.0311174	0.0386904
CATTGT	2543	28	0.0110106	0.0171879
CACCGG	2012	29	0.0144135	0.0171964
CACTGG	5936	23	0.00387466	0.00487125
CATCGG	716	14	0.0195531	0.024792
CATTGG	3536	71	0.0200792	0.0264708
CCCCAA	3542	166	0.0468662	0.0571082
CCCTAA	1732	39	0.0225173	0.0301108
CCTCAA	2913	328	0.112599	0.150779
CCTTAA	1629	119	0.073051	0.108297
CCCCAC	7174	263	0.0366602	0.0442435
CCCTAC	2245	36	0.0160356	0.0193506
CCTCAC	4991	515	0.103186	0.135443
CCTTAC	1552	82	0.0528351	0.084892
CCCCAT	3483	122	0.0350273	0.0435746
CCCTAT	1483	26	0.017532	0.0212849
CCTCAT	3872	350	0.0903926	0.117376
CCTTAT	1447	72	0.0497581	0.0639125
CCCCAG	9313	406	0.043595	0.0552299
CCCTAG	3429	45	0.0131234	0.0152886
CCTCAG	7714	794	0.10293	0.134354
CCTTAG	2368	123	0.0519426	0.0695442
CCCCCA	5508	115	0.0208787	0.0248046
CCCTCA	4684	97	0.0207088	0.0249821
CCTCCA	7431	526	0.0707846	0.101315
CCTTCA	3408	139	0.0407864	0.052636
CCCCCC	3462	81	0.0233969	0.027479
CCCTCC	12132	187	0.0154138	0.0201235
CCTCCC	15398	948	0.0615664	0.0781733
CCTTCC	8103	309	0.038134	0.0487801
CCCCCT	6826	129	0.0188983	0.0223534
CCCTCT	8493	117	0.0137761	0.0164141
CCTCCT	11092	646	0.0582402	0.0752301
CCTTCT	5123	182	0.0355261	0.0467658
CCCCCG	5033	81	0.0160938	0.0198125
CCCTCG	3206	28	0.00873362	0.00866005
CCTCCG	4827	270	0.0559354	0.0718809
CCTTCG	1439	51	0.0354413	0.0453355
CCCCTA	2722	54	0.0198384	0.0253321
CCCTTA	1813	21	0.011583	0.0114552
CCTCTA	3502	124	0.0354083	0.0427333
CCTTTA	1995	76	0.0380952	0.0607346
CCCCTC	8380	134	0.0159905	0.0183622
CCCTTC	5597	71	0.0126854	0.0161007
CCTCTC	7742	277	0.0357789	0.0425125
CCTTTC	4419	137	0.0310025	0.0409128
CCCCTT	4513	69	0.0152892	0.0168318
CCCTTT	3834	38	0.00991132	0.0124246
CCTCTT	4974	169	0.0339767	0.042481
CCTTTT	2961	56	0.0189125	0.0253179
CCCCTG	7603	114	0.0149941	0.0184544
CCCTTG	3814	33	0.00865233	0.0112023
CCTCTG	9946	334	0.0335813	0.0400989
CCTTTG	3753	104	0.0277112	0.0344131
CCCCGA	2266	76	0.0335393	0.0465567
CCCTGA	5531	60	0.0108479	0.0136255
CCTCGA	1017	62	0.0609636	0.0710829
CCTTGA	2691	84	0.0312152	0.0414044
CCCCGC	13219	224	0.0169453	0.0222578
CCCTGC	9799	99	0.0101031	0.011635
CCTCGC	4083	266	0.0651482	0.0785572
CCTTGC	3801	123	0.0323599	0.039742
CCCCGT	2053	55	0.0267901	0.031933
CCCTGT	4737	51	0.0107663	0.0131864
CCTCGT	1448	97	0.066989	0.0832772
CCTTGT	2851	61	0.021396	0.0272613
CCCCGG	5877	130	0.0221201	0.0274208
CCCTGG	9732	88	0.00904233	0.01225
CCTCGG	3768	228	0.0605096	0.0865951
CCTTGG	4937	141	0.0285599	0.0395002
CTCCAA	3694	149	0.0403357	0.0587571
CTCTAA	1915	20	0.0104439	0.0113851
CTTCAA	2237	274	0.122485	0.16567
CTTTAA	2057	148	0.0719494	0.104743
CTCCAC	5785	160	0.0276577	0.0334673
CTCTAC	2145	33	0.0153846	0.0254162
CTTCAC	3034	316	0.104153	0.158618
CTTTAC	1557	78	0.0500963	0.0630414
CTCCAT	3689	109	0.0295473	0.034105
CTCTAT	1757	17	0.00967558	0.0107264
CTTCAT	2755	269	0.0976407	0.126628
CTTTAT	1809	109	0.0602543	0.11639
CTCCAG	9317	249	0.0267253	0.0330985
CTCTAG	3660	36	0.00983607	0.00974198
CTTCAG	4733	441	0.0931756	0.130158
CTTTAG	1836	86	0.046841	0.0577502
CTCCCA	8469	162	0.0191286	0.0239609
CTCTCA	4436	53	0.0119477	0.0140624
CTTCCA	5065	337	0.066535	0.0913463
CTTTCA	3055	124	0.0405892	0.0572911
CTCCCC	9938	192	0.0193198	0.0280055
CTCTCC	8066	82	0.0101661	0.010808
CTTCCC	8608	689	0.0800418	0.107105
CTTTCC	5573	170	0.0305042	0.0367578
CTCCCT	10028	187	0.0186478	0.0258814
CTCTCT	7301	79	0.0108204	0.0148144
CTTCCT	9538	605	0.0634305	0.0881435
CTTTCT	4784	136	0.0284281	0.0330616
CTCCCG	5688	91	0.0159986	0.0178555
CTCTCG	2089	22	0.0105314	0.0104254
CTTCCG	4511	207	0.0458878	0.0637475
CTTTCG	836	38	0.0454545	0.108111
CTCCTA	2787	41	0.0147112	0.0180893
CTCTTA	2104	16	0.00760456	0.00755032
CTTCTA	1918	70	0.0364964	0.0477023
CTTTTA	1751	52	0.0296973	0.043689
CTCCTC	10316	134	0.0129895	0.0153426
CTCTTC	5103	32	0.00627082	0.00780073
CTTCTC	5312	219	0.0412274	0.0553514
CTTTTC	3447	66	0.0191471	0.0245898
CTCCTT	5382	71	0.0131921	0.0167373
CTCTTT	3694	19	0.00514348	0.00620154
CTTCTT	3417	124	0.0362891	0.0408373
CTTTTT	2735	33	0.0120658	0.0141192
CTCCTG	8556	105	0.0122721	0.0156296
CTCTTG	3813	29	0.00760556	0.0106976
CTTCTG	6028	199	0.0330126	0.0412196
CTTTTG	2511	45	0.0179211	0.0247783
CTCCGA	1616	31	0.0191832	0.0262572
CTCTGA	6360	40	0.00628931	0.00876685
CTTCGA	521	46	0.0882917	0.126805
CTTTGA	2515	64	0.0254473	0.0319695
CTCCGC	6477	97	0.0149761	0.0200042
CTCTGC	9122	69	0.00756413	0.0105776
CTTCGC	1608	112	0.0696517	0.0897318
CTTTGC	3657	88	0.0240634	0.0300554
CTCCGT	1673	32	0.0191273	0.0367153
CTCTGT	5961	45	0.00754907	0.0101779
CTTCGT	802	50	0.0623441	0.0760085
CTTTGT	3068	62	0.0202086	0.0256756
CTCCGG	4120	67	0.0162621	0.0184293
CTCTGG	8679	52	0.00599147	0.00826094
CTTCGG	1462	79	0.0540356	0.0662089
CTTTGG	3716	88	0.0236814	0.0317405
CGCCAA	1422	106	0.0745429	0.15489
CGCTAA	547	14	0.0255941	0.0506258
CGTCAA	596	15	0.0251678	0.0279369
CGTTAA	315	4	0.0126984	0.0125771
CGCCAC	3232	66	0.0204208	0.0342471
CGCTAC	785	5	0.00636943	0.00633693
CGTCAC	2450	42	0.0171429	0.0201225
CGTTAC	485	9	0.0185567	0.0223822
CGCCAT	1681	49	0.0291493	0.0366498
CGCTAT	491	8	0.0162933	0.0201422
CGTCAT	1343	29	0.0215934	0.0211429
CGTTAT	343	2	0.0058309	0.00581385
CGCCAG	3811	100	0.0262398	0.0376315
CGCTAG	1239	12	0.00968523	0.0112147
CGTCAG	1916	45	0.0234864	0.0250356
CGTTAG	522	6	0.0114943	0.0113839
CGCCCA	4634	75	0.0161847	0.0185163
CGCTCA	1952	25	0.0128074	0.0136749
CGTCCA	1310	41	0.0312977	0.0440923
CGTTCA	645	6	0.00930233	0.0092301
CGCCCC	13331	149	0.011177	0.0137535
CGCTCC	4796	54	0.0112594	0.0144717
CGTCCC	2695	73	0.0270872	0.0367567
CGTTCC	1517	19	0.0125247	0.0150145
CGCCCT	5523	87	0.0157523	0.0202154
CGCTCT	2901	40	0.0137883	0.0149822
CGTCCT	1832	51	0.0278384	0.0369089
CGTTCT	1021	16	0.0156709	0.0232836
CGCCCG	6028	83	0.0137691	0.0212141
CGCTCG	2319	16	0.00689953	0.00771769
CGTCCG	1499	25	0.0166778	0.0297617
CGTTCG	459	5	0.0108932	0.0107981
CGCCTA	1162	18	0.0154905	0.0359355
CGCTTA	566	3	0.00530035	0.00528159
CGTCTA	503	9	0.0178926	0.0255756
CGTTTA	410	3	0.00731707	0.00728129
CGCCTC	6205	73	0.0117647	0.0154966
CGCTTC	2385	25	0.0104822	0.0162491
CGTCTC	1845	24	0.0130081	0.0171843
CGTTTC	1217	19	0.0156122	0.0153811
CGCCTT	2349	31	0.0131971	0.0164356
CGCTTT	1214	7	0.00576606	0.00573754
CGTCTT	977	18	0.0184237	0.0242504
CGTTTT	756	6	0.00793651	0.00788395
CGCCTG	4709	47	0.00998089	0.0120074
CGCTTG	1310	18	0.0137405	0.0166178
CGTCTG	1829	25	0.0136687	0.0200538
CGTTTG	797	5	0.00627353	0.00875456
CGCCGA	1818	36	0.019802	0.0271256
CGCTGA	2313	22	0.00951146	0.00942506
CGTCGA	327	8	0.0244648	0.0300745
CGTTGA	564	5	0.00886525	0.0123547
CGCCGC	8672	104	0.0119926	0.0157713
CGCTGC	4755	40	0.0084122	0.0104467
CGTCGC	1468	26	0.0177112	0.024226
CGTTGC	1150	9	0.00782609	0.00951224
CGCCGT	1644	22	0.013382	0.013211
CGCTGT	2363	21	0.00888701	0.0096585
CGTCGT	478	8	0.0167364	0.0206837
CGTTGT	600	3	0.005	0.00498331
CGCCGG	5190	81	0.0156069	0.0261584
CGCTGG	3953	44	0.0111308	0.0145522
CGTCGG	1144	19	0.0166084	0.023346
CGTTGG	999	8	0.00800801	0.00995585
TACCAA	1340	57	0.0425373	0.0616694
TACTAA	1012	5	0.00494071	0.00492116
TATCAA	737	43	0.0583446	0.0686021
TATTAA	1028	34	0.0330739	0.0553802
TACCAC	2047	35	0.0170982	0.0177916
TACTAC	888	8	0.00900901	0.0111927
TATCAC	1115	51	0.0457399	0.0634356
TATTAC	1136	30	0.0264085	0.0363064
TACCAT	1545	26	0.0168285	0.0230327
TACTAT	956	4	0.0041841	0.00417096
TATCAT	1067	41	0.0384255	0.0444883
TATTAT	1177	37	0.0314359	0.0406776
TACCAG	2122	21	0.00989632	0.010746
TACTAG	889	2	0.00224972	0.00224719
TATCAG	1297	56	0.0431766	0.0598627
TATTAG	1119	25	0.0223414	0.0272285
TACCCA	2130	31	0.014554	0.0181065
TACTCA	3336	18	0.00539568	0.00656758
TATCCA	1531	69	0.0450686	0.0587518
TATTCA	2024	31	0.0153162	0.0200322
TACCCC	1368	21	0.0153509	0.0180524
TACTCC	1782	11	0.00617284	0.00838411
TATCCC	1427	53	0.0371409	0.0498117
TATTCC	1597	17	0.010645	0.0105382
TACCCT	1594	12	0.00752823	0.00747625
TACTCT	1778	12	0.00674916	0.00895836
TATCCT	1775	46	0.0259155	0.0297677
TATTCT	1685	15	0.00890208	0.0100157
TACCCG	742	7	0.00943396	0.00935757
TACTCG	437	4	0.00915332	0.00909034
TATCCG	400	12	0.03	0.0341855
TATTCG	237	3	0.0126582	0.0210255
TACCTA	643	9	0.0139969	0.020053
TACTTA	1105	5	0.00452489	0.00450849
TATCTA	804	17	0.0211443	0.0506109
TATTTA	1810	25	0.0138122	0.021368
TACCTC	1561	16	0.0102498	0.0204077
TACTTC	1771	5	0.00282326	0.00281688
TATCTC	1403	16	0.0114041	0.0198413
TATTTC	2421	17	0.00702189	0.00780191
TACCTT	824	5	0.00606796	0.00603847
TACTTT	1474	6	0.00407056	0.00813006
TATCTT	1278	14	0.0109546	0.0108431
TATTTT	2429	15	0.00617538	0.00778722
TACCTG	731	10	0.0136799	0.0244701
TACTTG	1496	7	0.00467914	0.0100115
TATCTG	1805	30	0.0166205	0.017462
TATTTG	1959	12	0.00612557	0.00813406
TACCGA	347	6	0.0172911	0.0286019
TACTGA	2093	6	0.0028667	0.00285985
TATCGA	120	3	0.025	0.0413866
TATTGA	940	22	0.0234043	0.0250108
TACCGC	852	12	0.0140845	0.0162526
TACTGC	2363	11	0.0046551	0.00802235
TATCGC	364	13	0.0357143	0.0841204
TATTGC	1384	6	0.00433526	0.00576572
TACCGT	370	3	0.00810811	0.00806416
TACTGT	2005	6	0.00299252	0.00298505
TATCGT	208	2	0.00961538	0.00956893
TATTGT	1243	12	0.00965406	0.0111789
TACCGG	603	9	0.0149254	0.0180493
TACTGG	2414	14	0.0057995	0.00742595
TATCGG	219	5	0.0228311	0.0315864
TATTGG	1657	36	0.021726	0.02489
TCCCAA	3299	111	0.0336466	0.0416207
TCCTAA	1859	23	0.0123722	0.0143786
TCTCAA	2550	171	0.0670588	0.0916175
TCTTAA	1583	68	0.0429564	0.0588363
TCCCAC	5229	171	0.0327022	0.0400551
TCCTAC	2041	24	0.0117589	0.0165283
TCTCAC	3509	249	0.0709604	0.0893189
TCTTAC	1695	46	0.0271386	0.0311403
TCCCAT	3526	121	0.0343165	0.0450632
TCCTAT	1740	14	0.00804598	0.0114361
TCTCAT	3395	201	0.0592047	0.0769298
TCTTAT	1490	74	0.0496644	0.0740932
TCCCAG	9936	281	0.028281	0.0347311
TCCTAG	2826	20	0.00707714	0.00844547
TCTCAG	5696	455	0.0798806	0.114952
TCTTAG	2069	72	0.0347994	0.0471443
TCCCCA	6346	130	0.0204853	0.0266882
TCCTCA	4844	44	0.0090834	0.0110676
TCTCCA	5565	302	0.0542677	0.0714614
TCTTCA	2989	88	0.0294413	0.0392936
TCCCCC	5060	82	0.0162055	0.0183181
TCCTCC	10212	90	0.00881316	0.0110868
TCTCCC	6780	373	0.0550147	0.074418
TCTTCC	5718	134	0.0234348	0.0274374
TCCCCT	5818	120	0.0206256	0.0287992
TCCTCT	6828	52	0.0076157	0.00873063
TCTCCT	6265	343	0.0547486	0.0728323
TCTTCT	3931	96	0.0244213	0.0319734
TCCCCG	4666	92	0.0197171	0.0253346
TCCTCG	1951	10	0.00512558	0.00612756
TCTCCG	2435	140	0.0574949	0.0780406
TCTTCG	828	18	0.0217391	0.0285474
TCCCTA	2445	25	0.0102249	0.0125795
TCCTTA	2150	13	0.00604651	0.00880474
TCTCTA	2478	89	0.0359161	0.0483664
TCTTTA	1942	32	0.0164779	0.0223971
TCCCTC	8084	123	0.0152152	0.0191919
TCCTTC	5265	40	0.00759734	0.00944075
TCTCTC	6042	192	0.0317776	0.0433535
TCTTTC	3842	55	0.0143155	0.016197
TCCCTT	4583	53	0.0115645	0.0144887
TCCTTT	4333	29	0.00669282	0.00664956
TCTCTT	3971	106	0.0266935	0.0320329
TCTTTT	2992	34	0.0113636	0.0152503
TCCCTG	8030	115	0.0143213	0.0205945
TCCTTG	3865	27	0.00698577	0.00797396
TCTCTG	7054	200	0.0283527	0.0357762
TCTTTG	3178	53	0.0166772	0.0252175
TCCCGA	1510	38	0.0251656	0.02985
TCCTGA	5076	22	0.00433412	0.00510436
TCTCGA	572	25	0.0437063	0.0523771
TCTTGA	2191	43	0.0196257	0.0274685
TCCCGC	5293	83	0.0156811	0.0188395
TCCTGC	7613	54	0.00709313	0.00914569
TCTCGC	1997	83	0.0415623	0.0518789
TCTTGC	3131	52	0.0166081	0.0220883
TCCCGT	1443	42	0.029106	0.0379872
TCCTGT	5341	30	0.00561693	0.00633549
TCTCGT	760	47	0.0618421	0.100255
TCTTGT	2390	34	0.0142259	0.0198896
TCCCGG	4746	101	0.0212811	0.0292625
TCCTGG	8485	56	0.00659988	0.008443
TCTCGG	1885	117	0.062069	0.0932792
TCTTGG	3672	55	0.0149782	0.0174819
TTCCAA	3274	52	0.0158827	0.0205237
TTCTAA	1837	9	0.00489929	0.00487794
TTTCAA	2410	132	0.0547718	0.0783604
TTTTAA	2252	49	0.0217584	0.0301794
TTCCAC	3747	44	0.0117427	0.0148114
TTCTAC	1384	5	0.00361272	0.0050484
TTTCAC	2616	133	0.050841	0.071984
TTTTAC	1417	25	0.0176429	0.0187563
TTCCAT	3197	44	0.0137629	0.0204613
TTCTAT	1612	8	0.00496278	0.00866561
TTTCAT	2946	127	0.0431093	0.0596011
TTTTAT	2124	47	0.0221281	0.0329534
TTCCAG	6403	60	0.00937061	0.0105339
TTCTAG	2014	3	0.00148957	0.00148809
TTTCAG	3779	210	0.0555703	0.0715538
TTTTAG	1639	42	0.0256254	0.039636
TTCCCA	6137	50	0.0081473	0.0116676
TTCTCA	4119	34	0.00825443	0.010131
TTTCCA	4491	169	0.0376308	0.0464678
TTTTCA	2922	39	0.013347	0.0145428
TTCCCC	5352	58	0.0108371	0.0137117
TTCTCC	4987	31	0.00621616	0.00778325
TTTCCC	5674	311	0.0548114	0.0814302
TTTTCC	4198	59	0.0140543	0.0162427
TTCCCT	6105	61	0.00999181	0.0108766
TTCTCT	5087	27	0.00530765	0.00567375
TTTCCT	6617	248	0.0374792	0.0508926
TTTTCT	4142	45	0.0108643	0.0160616
TTCCCG	2820	26	0.00921986	0.010557
TTCTCG	1081	3	0.00277521	0.00277007
TTTCCG	1874	72	0.0384205	0.0497777
TTTTCG	510	13	0.0254902	0.0327478
TTCCTA	2804	13	0.00463623	0.00461639
TTCTTA	2074	7	0.00337512	0.00336535
TTTCTA	2123	45	0.0211964	0.0330095
TTTTTA	2205	19	0.00861678	0.00945385
TTCCTC	6721	34	0.00505877	0.00622441
TTCTTC	3567	15	0.00420521	0.00474956
TTTCTC	4564	89	0.0195004	0.0292054
TTTTTC	3227	25	0.00774713	0.0126492
TTCCTT	5472	30	0.00548246	0.00691565
TTCTTT	3967	18	0.00453743	0.00502227
TTTCTT	3966	62	0.0156329	0.0189233
TTTTTT	6699	20	0.00298552	0.00327565
TTCCTG	9037	48	0.0053115	0.00594788
TTCTTG	2958	6	0.0020284	0.00202497
TTTCTG	4986	73	0.014641	0.019244
TTTTTG	2379	15	0.00630517	0.00795014
TTCCGA	916	7	0.00764192	0.0097776
TTCTGA	4245	10	0.00235571	0.00282197
TTTCGA	373	16	0.0428954	0.0626712
TTTTGA	2169	23	0.010604	0.0114189
TTCCGC	2561	30	0.0117142	0.0186127
TTCTGC	4425	22	0.00497175	0.00675647
TTTCGC	748	32	0.0427807	0.0677791
TTTTGC	2357	19	0.00806109	0.0105462
TTCCGT	1245	7	0.00562249	0.0104185
TTCTGT	3932	10	0.00254323	0.00304619
TTTCGT	469	27	0.0575693	0.0842855
TTTTGT	2508	24	0.00956938	0.0126727
TTCCGG	3848	21	0.00545738	0.00646878
TTCTGG	4928	13	0.00263799	0.00303749
TTTCGG	722	33	0.0457064	0.0658692
TTTTGG	2142	20	0.00933707	0.0120566
TGCCAA	3282	79	0.0240707	0.0381281
TGCTAA	2003	9	0.00449326	0.00547431
TGTCAA	1601	36	0.0224859	0.0294941
TGTTAA	1372	21	0.0153061	0.0252944
TGCCAC	4491	79	0.0175907	0.0230758
TGCTAC	1742	11	0.00631458	0.00972461
TGTCAC	2835	56	0.0197531	0.0250155
TGTTAC	1516	17	0.0112137	0.0256167
TGCCAT	3530	49	0.013881	0.0176593
TGCTAT	1980	9	0.00454545	0.00452708
TGTCAT	3407	72	0.021133	0.0300876
TGTTAT	1561	20	0.0128123	0.0177845
TGCCAG	6122	101	0.0164979	0.0198225
TGCTAG	2092	13	0.00621415	0.00904793
TGTCAG	3813	82	0.0215054	0.0273443
TGTTAG	1728	15	0.00868056	0.0109263
TGCCCA	5660	63	0.0111307	0.0159567
TGCTCA	4681	35	0.00747703	0.00870477
TGTCCA	3598	79	0.0219566	0.0281527
TGTTCA	2447	24	0.00980793	0.0097157
TGCCCC	5932	59	0.00994606	0.0115348
TGCTCC	5356	38	0.00709485	0.00891324
TGTCCC	3450	70	0.0202899	0.0251028
TGTTCC	2924	28	0.00957592	0.0122244
TGCCCT	6412	63	0.00982533	0.012226
TGCTCT	5414	33	0.00609531	0.00901512
TGTCCT	3936	63	0.0160061	0.0233778
TGTTCT	3213	20	0.00622471	0.00805589
TGCCCG	2816	31	0.0110085	0.0144436
TGCTCG	1319	6	0.0045489	0.00756655
TGTCCG	1174	28	0.0238501	0.0267112
TGTTCG	506	4	0.00790514	0.00785818
TGCCTA	2232	15	0.00672043	0.00667826
TGCTTA	2211	14	0.00633198	0.00810468
TGTCTA	1648	17	0.0103155	0.0114297
TGTTTA	2478	14	0.00564972	0.00642749
TGCCTC	5755	37	0.00642919	0.00847447
TGCTTC	4189	8	0.00190976	0.00190657
TGTCTC	4157	60	0.0144335	0.0200034
TGTTTC	3386	19	0.00561134	0.00617234
TGCCTT	4204	20	0.00475737	0.00568757
TGCTTT	3692	20	0.00541712	0.00647295
TGTCTT	3075	36	0.0117073	0.0141765
TGTTTT	3264	6	0.00183824	0.00183542
TGCCTG	7727	54	0.00698848	0.00823487
TGCTTG	3337	18	0.00539407	0.00716514
TGTCTG	4830	42	0.00869565	0.0135918
TGTTTG	3017	14	0.00464037	0.0052835
TGCCGA	1019	9	0.00883219	0.00876278
TGCTGA	5846	21	0.0035922	0.00529077
TGTCGA	331	4	0.0120846	0.0119747
TGTTGA	2383	15	0.00629459	0.00793685
TGCCGC	2838	23	0.0081043	0.00804145
TGCTGC	6987	32	0.00457993	0.00627733
TGTCGC	855	9	0.0105263	0.0127696
TGTTGC	2774	11	0.00396539	0.00395109
TGCCGT	1160	12	0.0103448	0.0119723
TGCTGT	5375	23	0.00427907	0.0057502
TGTCGT	566	11	0.0194346	0.0190907
TGTTGT	2344	7	0.00298635	0.00383231
TGCCGG	2809	32	0.011392	0.0169642
TGCTGG	8179	28	0.0034234	0.00439033
TGTCGG	974	14	0.0143737	0.0141817
TGTTGG	2827	14	0.00495225	0.00634489
GACCAA	2513	137	0.0545165	0.0778389
GACTAA	2789	14	0.00501972	0.00643103
GATCAA	870	36	0.0413793	0.0489187
GATTAA	1082	9	0.00831793	0.0101065
GACCAC	3013	42	0.0139396	0.0170699
GACTAC	1690	2	0.00118343	0.00118273
GATCAC	1604	43	0.026808	0.0323439
GATTAC	1180	11	0.00932203	0.0126357
GACCAT	1565	22	0.0140575	0.0177051
GACTAT	1140	3	0.00263158	0.00262696
GATCAT	1363	38	0.0278797	0.0300592
GATTAT	990	3	0.0030303	0.00302418
GACCAG	3641	55	0.0151057	0.0203761
GACTAG	1528	1	0.00065445	0.00065445
GATCAG	1851	43	0.0232307	0.0248654
GATTAG	1117	11	0.00984781	0.0133438
GACCCA	2961	20	0.00675447	0.00806247
GACTCA	12345	49	0.00396922	0.00492592
GATCCA	1720	28	0.0162791	0.0206772
GATTCA	3921	26	0.00663096	0.00760908
GACCCC	2240	21	0.009375	0.0110778
GACTCC	3912	10	0.00255624	0.00255035
GATCCC	2137	49	0.0229293	0.0299047
GATTCC	2652	12	0.00452489	0.00601498
GACCCT	1977	14	0.00708144	0.00804699
GACTCT	3225	14	0.00434109	0.00618462
GATCCT	1984	34	0.0171371	0.0198776
GATTCT	2169	17	0.00783771	0.0105474
GACCCG	2172	20	0.0092081	0.01097
GACTCG	1306	4	0.00306279	0.00305575
GATCCG	940	20	0.0212766	0.0251059
GATTCG	492	7	0.0142276	0.0140538
GACCTA	1170	7	0.00598291	0.0059522
GACTTA	1306	1	0.000765697	0.000765697
GATCTA	839	7	0.00834327	0.0106702
GATTTA	1102	4	0.00362976	0.00361987
GACCTC	3140	11	0.00350318	0.00349202
GACTTC	2827	15	0.00530598	0.00598741
GATCTC	1888	19	0.0100636	0.0120873
GATTTC	2116	10	0.0047259	0.00565141
GACCTT	1755	9	0.00512821	0.00510482
GACTTT	1987	5	0.00251636	0.00251129
GATCTT	1345	16	0.0118959	0.0177155
GATTTT	1684	3	0.00178147	0.00177936
GACCTG	2992	10	0.00334225	0.00333219
GACTTG	2412	4	0.00165837	0.00165631
GATCTG	2423	28	0.0115559	0.0139044
GATTTG	1648	4	0.00242718	0.00242276
GACCGA	789	5	0.00633714	0.00884304
GACTGA	3404	9	0.00264395	0.00322545
GATCGA	245	4	0.0163265	0.0161258
GATTGA	1166	15	0.0128645	0.0195769
GACCGC	1954	15	0.00767656	0.00966966
GACTGC	3606	6	0.00166389	0.00166159
GATCGC	730	8	0.0109589	0.0163406
GATTGC	1575	4	0.00253968	0.00253484
GACCGT	715	7	0.00979021	0.00970794
GACTGT	3035	11	0.00362438	0.00361244
GATCGT	273	3	0.010989	0.0109082
GATTGT	1302	6	0.00460829	0.00459058
GACCGG	1712	6	0.00350467	0.00349443
GACTGG	4152	13	0.00313102	0.00408559
GATCGG	514	11	0.0214008	0.0287809
GATTGG	3846	55	0.0143006	0.0177408
GCCCAA	3319	203	0.061163	0.093003
GCCTAA	1532	16	0.0104439	0.0129542
GCTCAA	2450	190	0.077551	0.102599
GCTTAA	1432	66	0.0460894	0.0705507
GCCCAC	5237	153	0.0292152	0.0340967
GCCTAC	1854	35	0.0188781	0.029325
GCTCAC	4310	313	0.0726218	0.0956763
GCTTAC	1393	54	0.0387653	0.0444732
GCCCAT	2971	95	0.0319758	0.0397179
GCCTAT	1566	15	0.00957854	0.0107708
GCTCAT	3349	215	0.0641983	0.0851844
GCTTAT	1300	42	0.0323077	0.0497637
GCCCAG	10988	351	0.0319439	0.0416663
GCCTAG	2784	25	0.00897989	0.00962109
GCTCAG	7490	608	0.0811749	0.107444
GCTTAG	2296	89	0.0387631	0.0468628
GCCCCA	7466	139	0.0186177	0.0222923
GCCTCA	5206	37	0.00710718	0.00782652
GCTCCA	5985	275	0.0459482	0.0625609
GCTTCA	3129	94	0.0300415	0.0457724
GCCCCC	9094	146	0.0160545	0.0201975
GCCTCC	10339	108	0.0104459	0.0140135
GCTCCC	8497	444	0.0522537	0.0742466
GCTTCC	7024	208	0.0296128	0.0395615
GCCCCT	7470	135	0.0180723	0.0231035
GCCTCT	7099	54	0.00760671	0.00924052
GCTCCT	6735	332	0.0492947	0.0694437
GCTTCT	4566	126	0.0275953	0.0373544
GCCCCG	11059	153	0.0138349	0.0169003
GCCTCG	3422	24	0.00701344	0.00755091
GCTCCG	5229	193	0.0369095	0.0542992
GCTTCG	1309	37	0.0282659	0.0336041
GCCCTA	2284	39	0.0170753	0.0237994
GCCTTA	1902	26	0.0136698	0.0198025
GCTCTA	2172	68	0.0313076	0.0395537
GCTTTA	1735	46	0.026513	0.0569668
GCCCTC	8458	102	0.0120596	0.0154629
GCCTTC	4785	50	0.0104493	0.0120145
GCTCTC	5383	181	0.0336244	0.050337
GCTTTC	3466	77	0.0222158	0.0309637
GCCCTT	3964	43	0.0108476	0.011742
GCCTTT	3449	26	0.00753842	0.00864385
GCTCTT	3650	121	0.0331507	0.0424743
GCTTTT	2603	36	0.0138302	0.018256
GCCCTG	9665	108	0.0111743	0.0143619
GCCTTG	4413	24	0.00543848	0.00722336
GCTCTG	8857	265	0.0299198	0.039868
GCTTTG	3645	85	0.0233196	0.0315636
GCCCGA	2159	37	0.0171376	0.0233392
GCCTGA	5482	40	0.00729661	0.00833938
GCTCGA	803	43	0.0535492	0.0781763
GCTTGA	2131	50	0.0234632	0.0313741
GCCCGC	7434	139	0.0186979	0.0250775
GCCTGC	8462	64	0.00756322	0.0110526
GCTCGC	3062	125	0.040823	0.0548504
GCTTGC	3094	88	0.0284421	0.0412212
GCCCGT	1557	21	0.0134875	0.0133141
GCCTGT	5094	40	0.00785238	0.00936303
GCTCGT	974	56	0.0574949	0.0665779
GCTTGT	2437	44	0.018055	0.0275885
GCCCGG	7235	109	0.0150657	0.0184349
GCCTGG	10738	74	0.00689141	0.00833473
GCTCGG	3349	130	0.0388176	0.0528536
GCTTGG	4159	71	0.0170714	0.020151
GTCCAA	1855	79	0.0425876	0.0656071
GTCTAA	1115	7	0.00627803	0.00624421
GTTCAA	1295	82	0.0633205	0.0840863
GTTTAA	1382	53	0.0383502	0.0586296
GTCCAC	2504	48	0.0191693	0.0260007
GTCTAC	1022	5	0.00489237	0.0048732
GTTCAC	1794	99	0.0551839	0.0733613
GTTTAC	1443	20	0.01386	0.0136774
GTCCAT	1688	37	0.0219194	0.0439769
GTCTAT	1070	6	0.00560748	0.00558125
GTTCAT	1571	74	0.0471038	0.0729391
GTTTAT	1614	43	0.0266419	0.045787
GTCCAG	4126	67	0.0162385	0.0193726
GTCTAG	1495	9	0.00602007	0.0100039
GTTCAG	2623	159	0.0606176	0.0737459
GTTTAG	1454	22	0.0151307	0.0190414
GTCCCA	3446	39	0.0113175	0.0140954
GTCTCA	2982	14	0.00469484	0.00534528
GTTCCA	2548	81	0.0317896	0.0347173
GTTTCA	2470	49	0.0198381	0.0235026
GTCCCC	3635	56	0.0154058	0.0212265
GTCTCC	4247	15	0.0035319	0.00352026
GTTCCC	3608	155	0.0429601	0.0527699
GTTTCC	4042	75	0.0185552	0.0246494
GTCCCT	3750	32	0.00853333	0.0127306
GTCTCT	3749	16	0.0042678	0.00425072
GTTCCT	3409	126	0.036961	0.0438213
GTTTCT	3312	52	0.0157005	0.0154586
GTCCCG	2998	19	0.00633756	0.00763416
GTCTCG	1164	9	0.00773196	0.00939846
GTTCCG	1570	68	0.0433121	0.0707806
GTTTCG	543	14	0.0257827	0.0509945
GTCCTA	1423	16	0.0112439	0.022377
GTCTTA	1270	8	0.00629921	0.00784051
GTTCTA	1327	33	0.0248681	0.0348261
GTTTTA	1527	10	0.00654879	0.00651017
GTCCTC	3611	19	0.0052617	0.0063435
GTCTTC	2566	13	0.00506625	0.006602
GTTCTC	2800	43	0.0153571	0.020843
GTTTTC	2743	27	0.00984324	0.0141263
GTCCTT	2374	15	0.00631845	0.0079668
GTCTTT	2174	11	0.0050598	0.0059569
GTTCTT	2129	48	0.0225458	0.0305065
GTTTTT	2100	12	0.00571429	0.00949568
GTCCTG	4793	38	0.00792823	0.0107885
GTCTTG	2304	10	0.00434028	0.00519175
GTTCTG	3433	73	0.0212642	0.0289766
GTTTTG	2242	18	0.00802855	0.0088601
GTCCGA	685	3	0.00437956	0.00436676
GTCTGA	3160	15	0.00474684	0.0047258
GTTCGA	370	15	0.0405405	0.0444225
GTTTGA	1680	18	0.0107143	0.0141794
GTCCGC	2099	26	0.0123869	0.0170057
GTCTGC	3573	24	0.00671704	0.0105932
GTTCGC	761	40	0.0525624	0.0709178
GTTTGC	2237	34	0.0151989	0.0221302
GTCCGT	810	6	0.00740741	0.00983381
GTCTGT	3123	19	0.00608389	0.00668943
GTTCGT	421	16	0.0380048	0.0461712
GTTTGT	2208	27	0.0122283	0.0138966
GTCCGG	1886	17	0.00901379	0.00999828
GTCTGG	4309	13	0.00301694	0.00393704
GTTCGG	786	29	0.0368957	0.0585096
GTTTGG	2512	26	0.0103503	0.0110438
GGCCAA	4567	233	0.0510182	0.0703269
GGCTAA	1714	11	0.00641774	0.00754781
GGTCAA	1473	29	0.0196877	0.0233893
GGTTAA	1265	23	0.0181818	0.027359
GGCCAC	6316	98	0.0155161	0.0197117
GGCTAC	2030	6	0.00295567	0.00294838
GGTCAC	3026	70	0.0231328	0.0272333
GGTTAC	1320	7	0.00530303	0.00527891
GGCCAT	2960	48	0.0162162	0.0227177
GGCTAT	1480	5	0.00337838	0.00336924
GGTCAT	2148	44	0.0204842	0.0256631
GGTTAT	1144	5	0.00437063	0.00435533
GGCCAG	8636	121	0.0140111	0.0179855
GGCTAG	2275	13	0.00571429	0.00656364
GGTCAG	4040	87	0.0215347	0.0275134
GGTTAG	1533	6	0.00391389	0.00390112
GGCCCA	5573	57	0.0102279	0.0122787
GGCTCA	5023	33	0.00656978	0.00772266
GGTCCA	2180	41	0.0188073	0.0221335
GGTTCA	1740	21	0.012069	0.0153804
GGCCCC	8674	82	0.00945354	0.0116713
GGCTCC	8852	55	0.00621329	0.00820905
GGTCCC	3675	52	0.0141497	0.0188525
GGTTCC	3131	25	0.00798467	0.0104794
GGCCCT	6090	54	0.008867	0.0104321
GGCTCT	6075	43	0.00707819	0.00867561
GGTCCT	2914	59	0.0202471	0.0267097
GGTTCT	2498	27	0.0108086	0.0147009
GGCCCG	5513	42	0.00761836	0.00937591
GGCTCG	2725	11	0.0040367	0.00549031
GGTCCG	1555	22	0.0141479	0.0152437
GGTTCG	740	8	0.0108108	0.0134148
GGCCTA	2105	27	0.0128266	0.0136187
GGCTTA	1884	7	0.0037155	0.00370366
GGTCTA	1117	8	0.00716204	0.00711712
GGTTTA	1405	7	0.00498221	0.00923442
GGCCTC	7203	47	0.00652506	0.00787189
GGCTTC	5069	26	0.00512922	0.00668245
GGTCTC	2746	22	0.00801165	0.00940756
GGTTTC	2957	18	0.00608725	0.00808201
GGCCTT	3910	34	0.00869565	0.0111804
GGCTTT	3493	14	0.00400802	0.00456583
GGTCTT	1850	11	0.00594595	0.00591379
GGTTTT	2436	11	0.0045156	0.00531841
GGCCTG	8974	58	0.00646312	0.0079823
GGCTTG	3851	20	0.00519346	0.00672627
GGTCTG	3585	24	0.00669456	0.012232
GGTTTG	2600	19	0.00730769	0.00956566
GGCCGA	2541	26	0.0102322	0.0203677
GGCTGA	6930	32	0.0046176	0.00546287
GGTCGA	481	10	0.02079	0.0329002
GGTTGA	1851	9	0.00486224	0.00808445
GGCCGC	7618	68	0.00892623	0.0130488
GGCTGC	9756	28	0.00287003	0.00347715
GGTCGC	1481	18	0.012154	0.0120143
GGTTGC	2435	19	0.00780287	0.0110319
GGCCGT	1955	13	0.00664962	0.00763232
GGCTGT	5719	25	0.00437139	0.00680145
GGTCGT	525	7	0.0133333	0.0169975
GGTTGT	1764	10	0.00566893	0.00790885
GGCCGG	7465	66	0.00884126	0.010104
GGCTGG	11513	36	0.0031269	0.00363859
GGTCGG	1620	12	0.00740741	0.00735708
GGTTGG	3197	11	0.00344073	0.00342996

## Sheet: 4_64PP_nakedDNA_6mer
seq	kmer_count	damage_count	mean	var
AACCAA	2542	51	0.0200629	0.0299004
AACTAA	1145	7	0.00611354	0.0113262
AATCAA	1488	69	0.046371	0.0523204
AATTAA	801	18	0.0224719	0.0269944
AACCAC	4024	44	0.0109344	0.0142975
AACTAC	1493	6	0.00401875	0.00400529
AATCAC	2975	90	0.0302521	0.0380892
AATTAC	1198	12	0.0100167	0.00992464
AACCAT	1820	20	0.010989	0.0119737
AACTAT	1234	3	0.00243112	0.00242717
AATCAT	2896	80	0.0276243	0.0337789
AATTAT	1016	8	0.00787402	0.00781971
AACCAG	3302	48	0.0145366	0.0179649
AACTAG	1166	5	0.00428816	0.00427344
AATCAG	3485	146	0.0418938	0.0516313
AATTAG	996	8	0.00803213	0.00797562
AACCCA	2760	30	0.0108696	0.0114802
AACTCA	2638	10	0.00379075	0.00453625
AATCCA	2215	45	0.020316	0.0262357
AATTCA	1996	15	0.00751503	0.0084648
AACCCC	2565	29	0.011306	0.0127426
AACTCC	2910	10	0.00343643	0.00411332
AATCCC	2956	94	0.0317997	0.0463658
AATTCC	3675	26	0.00707483	0.00920415
AACCCT	2585	12	0.00464217	0.0053964
AACTCT	2481	4	0.00161225	0.0016103
AATCCT	2557	41	0.0160344	0.0196958
AATTCT	2608	15	0.00575153	0.00725498
AACCCG	1382	14	0.0101302	0.0114831
AACTCG	691	5	0.00723589	0.00719394
AATCCG	756	15	0.0198413	0.0194734
AATTCG	354	3	0.00847458	0.0140923
AACCTA	1080	7	0.00648148	0.00829901
AACTTA	1018	3	0.00294695	0.00294116
AATCTA	1002	10	0.00998004	0.00989031
AATTTA	1285	3	0.00233463	0.00233099
AACCTC	2702	3	0.00111029	0.00110947
AACTTC	2271	8	0.00352268	0.00439287
AATCTC	2007	16	0.0079721	0.0128975
AATTTC	2101	10	0.00475964	0.00473924
AACCTT	1494	11	0.00736278	0.0126718
AACTTT	1613	3	0.00185989	0.00185758
AATCTT	1602	12	0.00749064	0.00743917
AATTTT	1782	6	0.003367	0.00335755
AACCTG	2207	8	0.00362483	0.00361333
AACTTG	1793	2	0.00111545	0.00111483
AATCTG	2523	9	0.00356718	0.00434889
AATTTG	1709	6	0.00351083	0.00350055
AACCGA	608	9	0.0148026	0.0343769
AACTGA	2554	10	0.00391543	0.00468502
AATCGA	297	10	0.03367	0.0596733
AATTGA	1016	8	0.00787402	0.00781971
AACCGC	1318	16	0.0121396	0.0135199
AACTGC	3053	8	0.00262037	0.00261436
AATCGC	717	23	0.0320781	0.0506455
AATTGC	1520	7	0.00460526	0.00590373
AACCGT	577	5	0.00866551	0.00860533
AACTGT	2357	8	0.00339415	0.00338406
AATCGT	356	9	0.0252809	0.0472464
AATTGT	1291	2	0.00154919	0.00154799
AACCGG	1158	10	0.00863558	0.010297
AACTGG	2858	7	0.00244927	0.00244412
AATCGG	659	13	0.0197269	0.0193671
AATTGG	1386	14	0.010101	0.0172264
ACCCAA	2357	94	0.0398812	0.0535871
ACCTAA	1014	12	0.0118343	0.0136801
ACTCAA	2844	263	0.0924754	0.125459
ACTTAA	1349	52	0.0385471	0.0459908
ACCCAC	3730	145	0.038874	0.0534629
ACCTAC	1226	8	0.00652529	0.00812065
ACTCAC	6803	532	0.0782008	0.0985588
ACTTAC	1268	41	0.0323344	0.0423633
ACCCAT	1982	62	0.0312815	0.0404142
ACCTAT	743	6	0.00807537	0.00802095
ACTCAT	6508	443	0.0680701	0.0923382
ACTTAT	1038	22	0.0211946	0.0246227
ACCCAG	5921	164	0.027698	0.03403
ACCTAG	1665	7	0.0042042	0.00418904
ACTCAG	8274	680	0.0821852	0.109768
ACTTAG	1738	56	0.0322209	0.0438662
ACCCCA	3733	81	0.0216984	0.0292718
ACCTCA	3266	21	0.00642988	0.00822817
ACTCCA	4008	210	0.0523952	0.0661335
ACTTCA	2514	67	0.0266508	0.0323177
ACCCCC	3158	52	0.0164661	0.0187342
ACCTCC	4408	37	0.00839383	0.0119558
ACTCCC	4641	289	0.0622711	0.0808198
ACTTCC	6004	136	0.0226516	0.0274728
ACCCCT	3146	58	0.0184361	0.0225535
ACCTCT	3165	20	0.00631912	0.0081775
ACTCCT	3892	198	0.0508736	0.0647461
ACTTCT	2869	51	0.0177762	0.0202557
ACCCCG	2522	38	0.0150674	0.0188129
ACCTCG	1237	8	0.00646726	0.00804876
ACTCCG	1761	100	0.0567859	0.0774553
ACTTCG	665	12	0.0180451	0.0207582
ACCCTA	1387	13	0.00937275	0.0107346
ACCTTA	847	7	0.00826446	0.0105699
ACTCTA	1525	41	0.0268852	0.0353659
ACTTTA	1369	13	0.00949598	0.0108747
ACCCTC	3490	18	0.00515759	0.00627892
ACCTTC	1974	8	0.00405268	0.00403831
ACTCTC	3114	62	0.0199101	0.0233747
ACTTTC	2358	20	0.00848176	0.0101105
ACCCTT	2030	24	0.0118227	0.0126744
ACCTTT	1302	8	0.00614439	0.00611133
ACTCTT	2445	61	0.0249489	0.028428
ACTTTT	1851	10	0.00540249	0.0053762
ACCCTG	4578	47	0.0102665	0.0119112
ACCTTG	1901	11	0.00578643	0.00575597
ACTCTG	4896	114	0.0232843	0.0288755
ACTTTG	2331	23	0.00986701	0.012349
ACCCGA	997	39	0.0391174	0.0496731
ACCTGA	1688	8	0.00473934	0.00709074
ACTCGA	515	40	0.0776699	0.130142
ACTTGA	1912	28	0.0146444	0.0165306
ACCCGC	2476	58	0.0234249	0.0269258
ACCTGC	2838	18	0.00634249	0.00700946
ACTCGC	1351	84	0.0621762	0.0879831
ACTTGC	2119	28	0.0132138	0.0187111
ACCCGT	769	25	0.0325098	0.0393063
ACCTGT	1332	5	0.00375375	0.00374247
ACTCGT	539	30	0.0556586	0.0600934
ACTTGT	1704	26	0.0152582	0.0244294
ACCCGG	2715	65	0.0239411	0.0307457
ACCTGG	2909	13	0.00446889	0.00445045
ACTCGG	1515	99	0.0653465	0.0756477
ACTTGG	2897	26	0.0089748	0.0109691
ATCCAA	1759	17	0.00966458	0.0107143
ATCTAA	1056	3	0.00284091	0.00283552
ATTCAA	1950	127	0.0651282	0.0896504
ATTTAA	1555	46	0.029582	0.0338734
ATCCAC	2235	31	0.0138702	0.0163698
ATCTAC	1141	4	0.0035057	0.00349647
ATTCAC	2848	165	0.0579354	0.0763754
ATTTAC	1418	25	0.0176305	0.0272119
ATCCAT	1762	21	0.0119183	0.0140544
ATCTAT	973	2	0.0020555	0.00205338
ATTCAT	3683	170	0.046158	0.0592485
ATTTAT	1913	27	0.014114	0.0181061
ATCCAG	3195	31	0.00970266	0.0133686
ATCTAG	1461	6	0.00410678	0.00546257
ATTCAG	3404	184	0.0540541	0.0670156
ATTTAG	1349	25	0.0185322	0.0271044
ATCCCA	3532	23	0.00651189	0.00873697
ATCTCA	2821	8	0.00283587	0.00353805
ATTCCA	4968	132	0.02657	0.0331171
ATTTCA	2984	36	0.0120643	0.0159456
ATCCCC	2819	15	0.00532104	0.00600432
ATCTCC	2877	5	0.00173792	0.00243091
ATTCCC	3412	136	0.0398593	0.0505949
ATTTCC	4489	40	0.00891067	0.0101701
ATCCCT	3271	26	0.00794864	0.0115576
ATCTCT	3043	7	0.00230036	0.00295329
ATTCCT	5256	123	0.0234018	0.0304703
ATTTCT	3456	33	0.00954861	0.0111968
ATCCCG	1373	10	0.00728332	0.010151
ATCTCG	692	3	0.00433526	0.00432271
ATTCCG	874	39	0.0446224	0.0655896
ATTTCG	398	6	0.0150754	0.0148855
ATCCTA	1458	1	0.000685871	0.000685871
ATCTTA	1201	4	0.00333056	0.00332223
ATTCTA	1595	24	0.015047	0.0223581
ATTTTA	1863	6	0.00322061	0.00321196
ATCCTC	3198	14	0.00437774	0.00561111
ATCTTC	1985	3	0.00151134	0.00150981
ATTCTC	2846	40	0.0140548	0.020189
ATTTTC	2337	10	0.00427899	0.00511867
ATCCTT	2389	8	0.00334868	0.00333887
ATCTTT	2018	4	0.00198216	0.00197921
ATTCTT	3278	46	0.0140329	0.0187228
ATTTTT	3012	7	0.00232404	0.00231941
ATCCTG	4151	10	0.00240906	0.00288576
ATCTTG	2193	5	0.00227998	0.00227582
ATTCTG	3344	46	0.013756	0.0153656
ATTTTG	2023	4	0.00197726	0.00197433
ATCCGA	528	5	0.0094697	0.0131929
ATCTGA	2818	3	0.00106458	0.00106383
ATTCGA	292	20	0.0684932	0.139622
ATTTGA	1772	25	0.0141084	0.020693
ATCCGC	1023	6	0.0058651	0.00583641
ATCTGC	3027	11	0.00363396	0.00494383
ATTCGC	516	20	0.0387597	0.0489802
ATTTGC	2120	21	0.00990566	0.010756
ATCCGT	544	5	0.00919118	0.00912347
ATCTGT	2604	3	0.00115207	0.00115119
ATTCGT	385	12	0.0311688	0.0354843
ATTTGT	2193	19	0.00866393	0.0122424
ATCCGG	1264	8	0.00632911	0.00787757
ATCTGG	3135	6	0.00191388	0.00191082
ATTCGG	528	25	0.0473485	0.0603725
ATTTGG	1995	10	0.00501253	0.00498991
AGCCAA	5040	104	0.0206349	0.024976
AGCTAA	1772	12	0.00677201	0.00785925
AGTCAA	2497	59	0.0236284	0.0270857
AGTTAA	1304	24	0.0184049	0.0318943
AGCCAC	5658	97	0.0171439	0.0210955
AGCTAC	1918	11	0.00573514	0.00674852
AGTCAC	7160	143	0.0199721	0.0273982
AGTTAC	1404	18	0.0128205	0.0197928
AGCCAT	3317	51	0.0153753	0.0181592
AGCTAT	1853	9	0.00485699	0.00483601
AGTCAT	7553	142	0.0188005	0.0216274
AGTTAT	1392	15	0.0107759	0.013543
AGCCAG	8184	161	0.0196725	0.0258869
AGCTAG	2196	11	0.00500911	0.00498629
AGTCAG	7246	168	0.0231852	0.0314845
AGTTAG	1434	11	0.00767085	0.00761732
AGCCCA	6173	79	0.0127977	0.0165245
AGCTCA	4935	36	0.00729483	0.00967519
AGTCCA	3091	74	0.0239405	0.0253166
AGTTCA	2188	31	0.0141682	0.0167173
AGCCCC	6945	95	0.0136789	0.017526
AGCTCC	6547	36	0.0054987	0.00669142
AGTCCC	4142	110	0.0265572	0.0355177
AGTTCC	3292	45	0.0136695	0.0195639
AGCCCT	6317	71	0.0112395	0.0136482
AGCTCT	5267	22	0.00417695	0.00833804
AGTCCT	3626	53	0.0146167	0.0188208
AGTTCT	2869	24	0.00836528	0.00899555
AGCCCG	3918	53	0.0135273	0.0164113
AGCTCG	1550	11	0.00709677	0.00834211
AGTCCG	1291	22	0.0170411	0.0167636
AGTTCG	565	6	0.0106195	0.0105253
AGCCTA	2214	15	0.00677507	0.00673221
AGCTTA	1594	12	0.00752823	0.00873174
AGTCTA	1442	13	0.00901526	0.0158798
AGTTTA	1508	15	0.00994695	0.0191445
AGCCTC	6887	59	0.00856687	0.0122705
AGCTTC	4036	19	0.00470763	0.00567796
AGTCTC	3463	36	0.0103956	0.0178006
AGTTTC	2717	21	0.00772911	0.00914495
AGCCTT	4069	26	0.00638978	0.00733379
AGCTTT	2918	16	0.00548321	0.00614065
AGTCTT	2459	29	0.0117934	0.0165411
AGTTTT	2120	6	0.00283019	0.00282351
AGCCTG	8362	58	0.00693614	0.00975932
AGCTTG	3202	15	0.00468457	0.00466408
AGTCTG	3957	32	0.00808693	0.0100458
AGTTTG	2152	15	0.00697026	0.00692489
AGCCGA	1890	33	0.0174603	0.0224583
AGCTGA	5714	18	0.00315016	0.00349086
AGTCGA	460	6	0.0130435	0.0172587
AGTTGA	1762	10	0.00567537	0.00678208
AGCCGC	4518	74	0.0163789	0.0192136
AGCTGC	7135	27	0.00378416	0.00405072
AGTCGC	1080	19	0.0175926	0.0210062
AGTTGC	2242	7	0.00312221	0.00311385
AGCCGT	1289	22	0.0170675	0.018342
AGCTGT	4969	23	0.0046287	0.00621851
AGTCGT	615	8	0.0130081	0.0161172
AGTTGT	1992	20	0.0100402	0.0310393
AGCCGG	4213	45	0.0106812	0.0115193
AGCTGG	7850	21	0.00267516	0.00317796
AGTCGG	1284	19	0.0147975	0.0161488
AGTTGG	2423	18	0.00742881	0.0115055
CACCAA	3036	95	0.0312912	0.0369118
CACTAA	1559	14	0.00898012	0.0178911
CATCAA	1825	98	0.0536986	0.0727728
CATTAA	1328	24	0.0180723	0.0207734
CACCAC	5288	112	0.02118	0.0290577
CACTAC	1620	14	0.00864198	0.0184552
CATCAC	3786	192	0.0507132	0.0666481
CATTAC	1769	32	0.0180893	0.0211658
CACCAT	3161	66	0.0208795	0.0280449
CACTAT	1443	4	0.002772	0.0041532
CATCAT	3205	154	0.0480499	0.0594882
CATTAT	1382	15	0.0108538	0.0107438
CACCAG	6321	149	0.0235722	0.0321974
CACTAG	3070	15	0.00488599	0.00616706
CATCAG	3989	187	0.0468789	0.0582331
CATTAG	1738	35	0.0201381	0.0358637
CACCCA	5852	57	0.00974026	0.0123816
CACTCA	4604	17	0.00369244	0.00367961
CATCCA	3598	109	0.0302946	0.0393934
CATTCA	3508	61	0.0173888	0.0205131
CACCCC	6339	99	0.0156176	0.0185317
CACTCC	5055	22	0.00435213	0.00472977
CATCCC	4705	164	0.0348565	0.0455535
CATTCC	6328	66	0.0104298	0.0128515
CACCCT	5334	63	0.011811	0.0150489
CACTCT	4288	22	0.0051306	0.00557199
CATCCT	5089	150	0.0294753	0.03726
CATTCT	4563	50	0.0109577	0.0139088
CACCCG	2571	26	0.0101128	0.0100144
CACTCG	1282	7	0.00546022	0.00543464
CATCCG	1330	56	0.0421053	0.0524019
CATTCG	601	16	0.0266223	0.0359567
CACCTA	1744	10	0.00573394	0.00685178
CACTTA	1843	6	0.00325556	0.0043325
CATCTA	2038	34	0.016683	0.0213219
CATTTA	1981	9	0.00454316	0.0055349
CACCTC	4625	44	0.00951351	0.0120202
CACTTC	5009	29	0.00578958	0.00855274
CATCTC	4195	46	0.0109654	0.0122784
CATTTC	4659	26	0.0055806	0.00726812
CACCTT	1962	12	0.00611621	0.00710179
CACTTT	2798	13	0.00464618	0.00605635
CATCTT	3240	33	0.0101852	0.0125545
CATTTT	3363	22	0.00654178	0.00769068
CACCTG	2842	24	0.00844476	0.0104883
CACTTG	2867	10	0.00348797	0.00487269
CATCTG	4928	58	0.0117695	0.0140689
CATTTG	2735	15	0.00548446	0.00545638
CACCGA	1098	21	0.0191257	0.0242465
CACTGA	4898	18	0.00367497	0.00488745
CATCGA	416	6	0.0144231	0.0142493
CATTGA	1738	21	0.0120829	0.015398
CACCGC	3716	59	0.0158773	0.0183212
CACTGC	6788	35	0.00515616	0.00601437
CATCGC	1131	32	0.0282935	0.0399067
CATTGC	3004	34	0.0113182	0.0138579
CACCGT	1283	27	0.0210444	0.0440186
CACTGT	4755	27	0.00567823	0.00690927
CATCGT	702	16	0.022792	0.0308635
CATTGT	2541	26	0.0102322	0.0195803
CACCGG	2024	42	0.020751	0.024285
CACTGG	5935	20	0.00336984	0.00369609
CATCGG	720	22	0.0305556	0.0519162
CATTGG	3507	33	0.00940975	0.00989432
CCCCAA	3441	52	0.0151119	0.019539
CCCTAA	1705	5	0.00293255	0.00292567
CCTCAA	2739	109	0.0397955	0.0506436
CCTTAA	1556	21	0.0134961	0.0133226
CCCCAC	7017	86	0.0122559	0.0149581
CCCTAC	2221	10	0.00450248	0.00718693
CCTCAC	4680	129	0.0275641	0.0332217
CCTTAC	1500	18	0.012	0.0145324
CCCCAT	3417	51	0.0149254	0.0193908
CCCTAT	1463	3	0.00205058	0.00204778
CCTCAT	3667	104	0.0283611	0.0379297
CCTTAT	1395	10	0.00716846	0.00712218
CCCCAG	9076	124	0.0136624	0.0159015
CCCTAG	3397	10	0.00294377	0.00293597
CCTCAG	7236	219	0.0302653	0.0423458
CCTTAG	2289	24	0.0104849	0.0112537
CCCCCA	5439	39	0.00717044	0.00822368
CCCTCA	4610	13	0.00281996	0.00281261
CCTCCA	7119	131	0.0184015	0.0256518
CCTTCA	3317	32	0.00964727	0.0125728
CCCCCC	3411	23	0.00674289	0.0072859
CCCTCC	11991	25	0.0020849	0.00308156
CCTCCC	14808	258	0.017423	0.0221182
CCTTCC	7892	67	0.00848961	0.0106997
CCCCCT	6753	50	0.00740412	0.00972005
CCCTCT	8407	19	0.00226002	0.00225518
CCTCCT	10695	174	0.0162693	0.0212427
CCTTCT	5004	43	0.00859313	0.0113193
CCCCCG	5002	42	0.00839664	0.00872772
CCCTCG	3188	10	0.00313676	0.0031279
CCTCCG	4657	75	0.0161048	0.0210035
CCTTCG	1403	8	0.00570207	0.0056736
CCCCTA	2684	9	0.0033532	0.00408864
CCCTTA	1795	3	0.00167131	0.00166945
CCTCTA	3416	26	0.00761124	0.00814117
CCTTTA	1945	9	0.00462725	0.00460821
CCCCTC	8283	33	0.00398406	0.00638355
CCCTTC	5548	15	0.00270368	0.00341796
CCTCTC	7547	57	0.00755267	0.00855678
CCTTTC	4322	20	0.00462749	0.00507
CCCCTT	4466	19	0.00425437	0.00468514
CCCTTT	3804	4	0.00105152	0.0010507
CCTCTT	4862	36	0.00740436	0.00817392
CCTTTT	2926	12	0.00410116	0.00408574
CCCCTG	7522	25	0.00332358	0.00517443
CCCTTG	3800	17	0.00447368	0.00656066
CCTCTG	9726	84	0.00863664	0.00979687
CCTTTG	3672	11	0.00299564	0.00353229
CCCCGA	2224	22	0.00989209	0.0124977
CCCTGA	5490	13	0.00236794	0.00345586
CCTCGA	975	16	0.0164103	0.0243711
CCTTGA	2635	17	0.00645161	0.00717172
CCCCGC	13117	110	0.00838606	0.0113661
CCCTGC	9725	19	0.00195373	0.00236146
CCTCGC	3905	60	0.0153649	0.0182065
CCTTGC	3720	30	0.00806452	0.00961497
CCCCGT	2019	15	0.00742942	0.00737788
CCCTGT	4697	7	0.00149031	0.0019143
CCTCGT	1386	25	0.0180375	0.020613
CCTTGT	2809	12	0.00427198	0.0049675
CCCCGG	5805	44	0.00757967	0.00855729
CCCTGG	9675	21	0.00217054	0.00278627
CCTCGG	3642	67	0.0183965	0.023556
CCTTGG	4849	30	0.00618684	0.00614983
CTCCAA	3683	122	0.0331252	0.0401843
CTCTAA	1913	20	0.0104548	0.013489
CTTCAA	2219	266	0.119874	0.184902
CTTTAA	2067	152	0.0735365	0.0991396
CTCCAC	5775	147	0.0254545	0.0320849
CTCTAC	2140	26	0.0121495	0.0204227
CTTCAC	3048	314	0.103018	0.130506
CTTTAC	1555	78	0.0501608	0.0631193
CTCCAT	3656	75	0.0205142	0.0255708
CTCTAT	1758	19	0.0108077	0.0129736
CTTCAT	2720	229	0.0841912	0.113174
CTTTAT	1793	72	0.0401562	0.0486098
CTCCAG	9334	280	0.0299979	0.0389586
CTCTAG	3651	27	0.00739523	0.00734256
CTTCAG	4777	486	0.101737	0.135795
CTTTAG	1824	67	0.0367325	0.0386939
CTCCCA	8484	184	0.0216879	0.0278215
CTCTCA	4430	44	0.00993228	0.010739
CTTCCA	5040	304	0.0603175	0.0781233
CTTTCA	3037	102	0.0335858	0.0443262
CTCCCC	9943	188	0.0189078	0.0235813
CTCTCC	8056	87	0.0107994	0.0171397
CTTCCC	8606	666	0.0773879	0.0979035
CTTTCC	5593	194	0.0346862	0.0427881
CTCCCT	10043	196	0.0195161	0.0249129
CTCTCT	7285	65	0.00892244	0.0129627
CTTCCT	9559	600	0.0627681	0.0808055
CTTTCT	4784	133	0.027801	0.0316334
CTCCCG	5699	109	0.0191262	0.0240287
CTCTCG	2087	23	0.0110206	0.0137807
CTTCCG	4668	399	0.0854756	0.118041
CTTTCG	841	42	0.0499405	0.0784554
CTCCTA	2777	28	0.0100828	0.0114257
CTCTTA	2103	15	0.00713267	0.00708516
CTTCTA	1906	54	0.0283316	0.038042
CTTTTA	1737	33	0.0189983	0.0267126
CTCCTC	10291	114	0.0110776	0.0150376
CTCTTC	5107	34	0.00665753	0.00739789
CTTCTC	5265	164	0.0311491	0.0381633
CTTTTC	3437	54	0.0157114	0.0207077
CTCCTT	5359	44	0.00821049	0.010011
CTCTTT	3686	10	0.00271297	0.00324908
CTTCTT	3395	102	0.0300442	0.0368107
CTTTTT	2729	28	0.0102602	0.0138243
CTCCTG	8533	77	0.00902379	0.0112875
CTCTTG	3813	29	0.00760556	0.010173
CTTCTG	6000	166	0.0276667	0.0342403
CTTTTG	2498	31	0.0124099	0.0178676
CTCCGA	1624	41	0.0252463	0.0406438
CTCTGA	6359	33	0.0051895	0.00547794
CTTCGA	516	35	0.0678295	0.0788854
CTTTGA	2511	61	0.0242931	0.0324773
CTCCGC	6491	107	0.0164844	0.0192968
CTCTGC	9112	54	0.00592625	0.00786741
CTTCGC	1632	149	0.091299	0.135743
CTTTGC	3658	89	0.0243302	0.0297606
CTCCGT	1677	29	0.0172928	0.0181972
CTCTGT	5951	29	0.00487313	0.00518633
CTTCGT	807	53	0.0656753	0.0738452
CTTTGT	3075	68	0.0221138	0.0261862
CTCCGG	4133	88	0.021292	0.0271361
CTCTGG	8669	43	0.0049602	0.00701277
CTTCGG	1495	134	0.0896321	0.136539
CTTTGG	3706	79	0.0213168	0.0332837
CGCCAA	1394	54	0.0387374	0.0530568
CGCTAA	543	5	0.0092081	0.00914015
CGTCAA	608	32	0.0526316	0.0730079
CGTTAA	322	12	0.0372671	0.0422205
CGCCAC	3256	98	0.0300983	0.0451768
CGCTAC	786	8	0.0101781	0.0151829
CGTCAC	2471	62	0.0250911	0.0269005
CGTTAC	487	12	0.0246407	0.0323134
CGCCAT	1676	42	0.0250597	0.0304164
CGCTAT	487	3	0.00616016	0.00613481
CGTCAT	1347	37	0.0274684	0.0326773
CGTTAT	344	5	0.0145349	0.0318581
CGCCAG	3831	124	0.0323675	0.0433385
CGCTAG	1238	13	0.0105008	0.0152494
CGTCAG	1926	60	0.0311526	0.0374706
CGTTAG	518	2	0.003861	0.00385354
CGCCCA	4624	68	0.0147059	0.0192516
CGCTCA	1942	16	0.00823893	0.0102361
CGTCCA	1302	30	0.0230415	0.0317515
CGTTCA	647	8	0.0123648	0.0122308
CGCCCC	13355	183	0.0137027	0.0178592
CGCTCC	4780	32	0.00669456	0.00706963
CGTCCC	2678	52	0.0194175	0.0242773
CGTTCC	1512	17	0.0112434	0.0190661
CGCCCT	5527	89	0.0161028	0.0205514
CGCTCT	2881	19	0.00659493	0.00724816
CGTCCT	1820	36	0.0197802	0.0248971
CGTTCT	1020	12	0.0117647	0.0116377
CGCCCG	6044	101	0.0167108	0.0223916
CGCTCG	2323	20	0.00860956	0.00940043
CGTCCG	1507	36	0.0238885	0.0339575
CGTTCG	456	2	0.00438596	0.00437633
CGCCTA	1161	11	0.00947459	0.00939291
CGCTTA	567	4	0.00705467	0.00701728
CGTCTA	504	11	0.0218254	0.0372961
CGTTTA	412	7	0.0169903	0.0313408
CGCCTC	6191	57	0.00920691	0.0117084
CGCTTC	2381	16	0.00671987	0.00751785
CGTCTC	1852	31	0.0167387	0.0207894
CGTTTC	1209	13	0.0107527	0.0139571
CGCCTT	2349	38	0.0161771	0.0380687
CGCTTT	1213	6	0.00494641	0.00492601
CGTCTT	977	17	0.0174002	0.0212133
CGTTTT	753	3	0.00398406	0.00397347
CGCCTG	4705	46	0.00977683	0.0152105
CGCTTG	1304	10	0.00766871	0.00761574
CGTCTG	1827	20	0.0109469	0.0119283
CGTTTG	796	3	0.00376884	0.00375936
CGCCGA	1808	22	0.0121681	0.0142403
CGCTGA	2307	19	0.0082358	0.0107734
CGTCGA	329	9	0.0273556	0.0266884
CGTTGA	563	3	0.0053286	0.00530963
CGCCGC	8686	110	0.0126641	0.0141171
CGCTGC	4753	37	0.00778456	0.00982996
CGTCGC	1473	33	0.0224033	0.0314271
CGTTGC	1150	9	0.00782609	0.00951224
CGCCGT	1642	24	0.0146163	0.0205053
CGCTGT	2349	6	0.00255428	0.00254884
CGTCGT	482	13	0.026971	0.0387721
CGTTGT	603	6	0.00995025	0.00986761
CGCCGG	5198	82	0.0157753	0.021302
CGCTGG	3940	26	0.00659898	0.00757259
CGTCGG	1142	17	0.0148862	0.0234417
CGTTGG	997	5	0.00501505	0.0049949
TACCAA	1321	28	0.0211961	0.0237928
TACTAA	1012	6	0.00592885	0.00787777
TATCAA	729	37	0.0507545	0.0702226
TATTAA	1026	25	0.0243665	0.0276984
TACCAC	2039	27	0.0132418	0.0140542
TACTAC	883	2	0.00226501	0.00226244
TATCAC	1118	53	0.0474061	0.0613138
TATTAC	1128	17	0.0150709	0.014857
TACCAT	1541	22	0.0142764	0.0231727
TACTAT	957	5	0.00522466	0.0052028
TATCAT	1069	44	0.04116	0.0488661
TATTAT	1156	14	0.0121107	0.0189008
TACCAG	2133	37	0.0173465	0.0236202
TACTAG	889	2	0.00224972	0.00224719
TATCAG	1302	58	0.0445469	0.0518188
TATTAG	1114	17	0.0152603	0.0150409
TACCCA	2123	25	0.0117758	0.0154126
TACTCA	3333	13	0.00390039	0.00388634
TATCCA	1515	49	0.0323432	0.0418859
TATTCA	2023	29	0.0143351	0.017104
TACCCC	1355	7	0.00516605	0.00662026
TACTCC	1779	7	0.00393479	0.00504638
TATCCC	1433	59	0.0411724	0.0534713
TATTCC	1601	24	0.0149906	0.0185251
TACCCT	1595	15	0.00940439	0.0118312
TACTCT	1774	7	0.00394589	0.00506056
TATCCT	1773	46	0.0259447	0.0309292
TATTCT	1683	14	0.00831848	0.0106323
TACCCG	749	14	0.0186916	0.0183667
TACTCG	436	3	0.00688073	0.0068491
TATCCG	411	27	0.0656934	0.0859177
TATTCG	236	1	0.00423729	0.00423729
TACCTA	642	6	0.00934579	0.00927289
TACTTA	1105	5	0.00452489	0.00450849
TATCTA	796	3	0.00376884	0.00375936
TATTTA	1803	12	0.00665557	0.00661495
TACCTC	1559	10	0.00641437	0.00894471
TACTTC	1775	11	0.00619718	0.00954444
TATCTC	1405	18	0.0128114	0.0183543
TATTTC	2416	12	0.00496689	0.00577242
TACCTT	823	5	0.00607533	0.00847886
TACTTT	1476	8	0.00542005	0.0081062
TATCTT	1277	17	0.0133125	0.0209825
TATTTT	2418	2	0.00082713	0.000826788
TACCTG	728	5	0.00686813	0.00958137
TACTTG	1495	3	0.00200669	0.002004
TATCTG	1793	20	0.0111545	0.0143844
TATTTG	1953	4	0.00204813	0.00204498
TACCGA	348	6	0.0172414	0.0227566
TACTGA	2091	7	0.00334768	0.00716582
TATCGA	123	5	0.0406504	0.0393176
TATTGA	921	2	0.00217155	0.00216919
TACCGC	849	8	0.00942285	0.00934507
TACTGC	2360	5	0.00211864	0.00211505
TATCGC	371	16	0.0431267	0.0467837
TATTGC	1390	12	0.00863309	0.0100046
TACCGT	371	5	0.0134771	0.0187368
TACTGT	2003	4	0.001997	0.00199401
TATCGT	211	6	0.028436	0.0372828
TATTGT	1241	13	0.0104754	0.0184386
TACCGG	609	15	0.0246305	0.0273529
TACTGG	2412	10	0.00414594	0.00413046
TATCGG	221	7	0.0316742	0.0399013
TATTGG	1632	8	0.00490196	0.00488092
TCCCAA	3304	123	0.0372276	0.0479628
TCCTAA	1852	14	0.0075594	0.0075063
TCTCAA	2595	234	0.0901734	0.128334
TCTTAA	1578	61	0.0386565	0.0524045
TCCCAC	5220	172	0.0329502	0.0452831
TCCTAC	2035	18	0.00884521	0.0136877
TCTCAC	3543	294	0.0829805	0.106607
TCTTAC	1711	71	0.0414962	0.058511
TCCCAT	3517	108	0.030708	0.0405812
TCCTAT	1746	17	0.00973654	0.00964727
TCTCAT	3404	210	0.0616921	0.0819996
TCTTAT	1470	52	0.0353741	0.0586525
TCCCAG	9958	316	0.0317333	0.0409734
TCCTAG	2822	17	0.0060241	0.0088258
TCTCAG	5748	495	0.0861169	0.110731
TCTTAG	2066	65	0.0314618	0.0411404
TCCCCA	6327	114	0.018018	0.0246516
TCCTCA	4832	29	0.00600166	0.00638086
TCTCCA	5554	294	0.0529348	0.0800355
TCTTCA	2986	82	0.0274615	0.0374366
TCCCCC	5065	94	0.0185587	0.0241421
TCCTCC	10175	47	0.00461916	0.00558118
TCTCCC	6802	386	0.056748	0.0732385
TCTTCC	5720	141	0.0246503	0.0317406
TCCCCT	5814	116	0.0199518	0.0267823
TCCTCT	6813	34	0.00499046	0.00525988
TCTCCT	6261	324	0.0517489	0.0628168
TCTTCT	3924	86	0.0219164	0.0275593
TCCCCG	4668	95	0.0203513	0.0272266
TCCTCG	1952	10	0.00512295	0.00509932
TCTCCG	2453	159	0.0648186	0.086743
TCTTCG	829	17	0.0205066	0.0201104
TCCCTA	2446	25	0.0102208	0.0117564
TCCTTA	2145	7	0.0032634	0.00418711
TCTCTA	2463	71	0.0288266	0.0410046
TCTTTA	1940	28	0.014433	0.0173264
TCCCTC	8058	96	0.0119136	0.0157449
TCCTTC	5258	31	0.00589578	0.00700347
TCTCTC	6037	178	0.0294848	0.0372352
TCTTTC	3831	44	0.0114853	0.0139673
TCCCTT	4572	42	0.00918635	0.0117292
TCCTTT	4323	24	0.0055517	0.00829865
TCTCTT	3955	89	0.0225032	0.0321187
TCTTTT	2983	22	0.00737513	0.00933526
TCCCTG	7993	68	0.00850744	0.0109386
TCCTTG	3862	24	0.0062144	0.00721338
TCTCTG	7025	173	0.0246263	0.0337044
TCTTTG	3159	30	0.00949668	0.0119427
TCCCGA	1520	50	0.0328947	0.0410502
TCCTGA	5078	23	0.00452934	0.00490365
TCTCGA	589	44	0.0747029	0.0896481
TCTTGA	2193	40	0.0182399	0.0206526
TCCCGC	5333	133	0.0249391	0.0329488
TCCTGC	7593	28	0.00368761	0.00393793
TCTCGC	2040	128	0.0627451	0.074531
TCTTGC	3128	44	0.0140665	0.0157918
TCCCGT	1442	43	0.0298197	0.0442177
TCCTGT	5332	21	0.00393848	0.00467404
TCTCGT	765	43	0.0562092	0.0635903
TCTTGT	2384	23	0.00964765	0.0103979
TCCCGG	4780	140	0.0292887	0.0405733
TCCTGG	8457	22	0.0026014	0.00283145
TCTCGG	1879	90	0.0478978	0.0498878
TCTTGG	3671	55	0.0149823	0.0180316
TTCCAA	3267	42	0.0128558	0.0151439
TTCTAA	1835	7	0.00381471	0.00380223
TTTCAA	2495	236	0.0945892	0.126575
TTTTAA	2265	61	0.0269316	0.0324016
TTCCAC	3742	35	0.00935329	0.0108721
TTCTAC	1385	5	0.00361011	0.00359967
TTTCAC	2690	223	0.0828996	0.116219
TTTTAC	1414	25	0.0176803	0.0230417
TTCCAT	3191	31	0.00971482	0.0102504
TTCTAT	1612	7	0.00434243	0.00556772
TTTCAT	3006	201	0.0668663	0.0990216
TTTTAT	2120	42	0.0198113	0.0269787
TTCCAG	6437	97	0.0150691	0.0170196
TTCTAG	2018	8	0.00396432	0.00494213
TTTCAG	3886	338	0.0869789	0.108263
TTTTAG	1639	37	0.0225747	0.0306256
TTCCCA	6155	68	0.0110479	0.0135276
TTCTCA	4116	27	0.00655977	0.00651832
TTTCCA	4526	196	0.0433053	0.047627
TTTTCA	2941	71	0.0241414	0.0358116
TTCCCC	5369	74	0.0137828	0.016576
TTCTCC	4977	18	0.00361664	0.00360428
TTTCCC	5715	338	0.0591426	0.0766555
TTTTCC	4205	76	0.0180737	0.027266
TTCCCT	6092	54	0.00886408	0.0120705
TTCTCT	5082	21	0.00413223	0.00411597
TTTCCT	6657	283	0.0425116	0.0539317
TTTTCT	4153	50	0.0120395	0.0133425
TTCCCG	2831	39	0.0137761	0.0164179
TTCTCG	1089	11	0.010101	0.0100082
TTTCCG	1899	100	0.0526593	0.0667724
TTTTCG	510	14	0.027451	0.042467
TTCCTA	2807	19	0.00676879	0.00886365
TTCTTA	2078	11	0.00529355	0.00526806
TTTCTA	2128	50	0.0234962	0.0323579
TTTTTA	2202	18	0.00817439	0.0108373
TTCCTC	6728	47	0.00698573	0.00991106
TTCTTC	3569	17	0.00476324	0.00530242
TTTCTC	4575	93	0.0203279	0.0256033
TTTTTC	3218	11	0.00341827	0.00340765
TTCCTT	5473	31	0.00566417	0.00672961
TTCTTT	3963	16	0.00403735	0.00604124
TTTCTT	3961	58	0.0146428	0.0179674
TTTTTT	6699	20	0.00298552	0.00327565
TTCCTG	9025	35	0.00387812	0.00430677
TTCTTG	2961	9	0.00303951	0.0030313
TTTCTG	5024	108	0.0214968	0.0242242
TTTTTG	2377	14	0.00588978	0.00922456
TTCCGA	926	16	0.0172786	0.0169984
TTCTGA	4245	11	0.00259128	0.00352769
TTTCGA	381	23	0.0603675	0.0673988
TTTTGA	2165	19	0.00877598	0.0096272
TTCCGC	2571	38	0.0147802	0.0176803
TTCTGC	4416	11	0.00249094	0.0029383
TTTCGC	770	53	0.0688312	0.0927854
TTTTGC	2357	19	0.00806109	0.0096973
TTCCGT	1253	14	0.0111732	0.0126546
TTCTGT	3927	5	0.00127324	0.00178136
TTTCGT	468	23	0.0491453	0.0596781
TTTTGT	2507	20	0.00797766	0.00871526
TTCCGG	3881	65	0.0167483	0.024204
TTCTGG	4932	18	0.00364964	0.00485384
TTTCGG	738	55	0.0745257	0.126053
TTTTGG	2144	23	0.0107276	0.0134173
TGCCAA	3276	66	0.0201465	0.028907
TGCTAA	2005	11	0.00548628	0.00645691
TGTCAA	1614	48	0.0297398	0.0350728
TGTTAA	1361	6	0.00440852	0.00439232
TGCCAC	4486	69	0.0153812	0.0178236
TGCTAC	1743	10	0.00573723	0.0068557
TGTCAC	2839	57	0.0200775	0.0232049
TGTTAC	1515	13	0.00858086	0.0124759
TGCCAT	3524	38	0.0107832	0.0118053
TGCTAT	1976	5	0.00253036	0.00252524
TGTCAT	3420	81	0.0236842	0.0283947
TGTTAT	1558	18	0.0115533	0.0255569
TGCCAG	6124	102	0.0166558	0.0196474
TGCTAG	2091	9	0.00430416	0.00428769
TGTCAG	3831	96	0.0250587	0.0280925
TGTTAG	1725	11	0.00637681	0.00749992
TGCCCA	5663	66	0.0116546	0.0161128
TGCTCA	4665	17	0.00364416	0.00406047
TGTCCA	3615	102	0.0282158	0.0401555
TGTTCA	2464	48	0.0194805	0.0256049
TGCCCC	5946	82	0.0137908	0.0196584
TGCTCC	5346	29	0.00542462	0.00726711
TGTCCC	3462	85	0.0245523	0.034358
TGTTCC	2925	32	0.0109402	0.0169801
TGCCCT	6407	62	0.00967692	0.0145801
TGCTCT	5408	25	0.00462278	0.00682161
TGTCCT	3942	64	0.0162354	0.0200358
TGTTCT	3220	28	0.00869565	0.0104866
TGCCCG	2814	29	0.0103056	0.013047
TGCTCG	1329	17	0.0127916	0.0171555
TGTCCG	1173	29	0.0247229	0.0309582
TGTTCG	507	5	0.00986193	0.00978397
TGCCTA	2226	10	0.00449236	0.00537307
TGCTTA	2208	10	0.00452899	0.00541672
TGTCTA	1642	11	0.00669915	0.00787709
TGTTTA	2481	19	0.0076582	0.010022
TGCCTC	5747	30	0.00522011	0.00763025
TGCTTC	4196	17	0.00405148	0.00498954
TGTCTC	4145	47	0.011339	0.0155567
TGTTTC	3379	11	0.0032554	0.00324576
TGCCTT	4209	28	0.00665241	0.00898615
TGCTTT	3686	12	0.00325556	0.00324584
TGTCTT	3066	25	0.00815395	0.0100477
TGTTTT	3266	8	0.00244948	0.00244423
TGCCTG	7717	43	0.00557211	0.00657859
TGCTTG	3332	10	0.0030012	0.00299309
TGTCTG	4827	36	0.00745805	0.00989049
TGTTTG	3020	16	0.00529801	0.00527169
TGCCGA	1021	12	0.0117532	0.0135872
TGCTGA	5846	18	0.00307903	0.00341225
TGTCGA	333	8	0.024024	0.0355657
TGTTGA	2383	13	0.00545531	0.00542783
TGCCGC	2854	45	0.0157673	0.0204313
TGCTGC	6984	28	0.00400916	0.00571212
TGTCGC	857	10	0.0116686	0.0115459
TGTTGC	2773	11	0.00396682	0.00467401
TGCCGT	1159	13	0.0112166	0.0162817
TGCTGT	5373	19	0.0035362	0.00426895
TGTCGT	565	10	0.0176991	0.0174167
TGTTGT	2344	9	0.00383959	0.00724091
TGCCGG	2808	36	0.0128205	0.0240607
TGCTGG	8175	24	0.00293578	0.00439559
TGTCGG	973	16	0.016444	0.0223631
TGTTGG	2836	28	0.00987306	0.0154228
GACCAA	2450	51	0.0208163	0.0244746
GACTAA	2789	13	0.00466117	0.00535847
GATCAA	859	22	0.0256112	0.0273153
GATTAA	1092	20	0.018315	0.0216624
GACCAC	3024	49	0.0162037	0.016608
GACTAC	1693	7	0.00413467	0.00648408
GATCAC	1617	57	0.0352505	0.0426923
GATTAC	1184	15	0.0126689	0.0159002
GACCAT	1562	20	0.0128041	0.0177732
GACTAT	1140	4	0.00350877	0.00525546
GATCAT	1367	46	0.0336503	0.0413266
GATTAT	1001	16	0.015984	0.0197443
GACCAG	3651	64	0.0175294	0.0221584
GACTAG	1531	4	0.00261267	0.00260755
GATCAG	1869	64	0.0342429	0.0384414
GATTAG	1122	18	0.0160428	0.0336407
GACCCA	2968	33	0.0111186	0.0204358
GACTCA	12351	53	0.00429115	0.00492086
GATCCA	1733	39	0.0225043	0.0243201
GATTCA	3939	47	0.011932	0.0148398
GACCCC	2238	17	0.00759607	0.00754174
GACTCC	3915	13	0.00332056	0.00331038
GATCCC	2141	49	0.0228865	0.0251769
GATTCC	2671	35	0.0131037	0.0204275
GACCCT	1975	12	0.00607595	0.00705526
GACTCT	3228	17	0.00526642	0.00771939
GATCCT	1999	54	0.0270135	0.0373079
GATTCT	2178	26	0.0119376	0.0154753
GACCCG	2171	17	0.00783049	0.00777276
GACTCG	1307	5	0.00382555	0.00381384
GATCCG	941	21	0.0223167	0.0282248
GATTCG	491	6	0.01222	0.0120953
GACCTA	1170	7	0.00598291	0.0059522
GACTTA	1306	1	0.000765697	0.000765697
GATCTA	841	8	0.00951249	0.00943321
GATTTA	1103	5	0.00453309	0.00451664
GACCTC	3145	16	0.00508744	0.00506317
GACTTC	2817	4	0.00141995	0.00141844
GATCTC	1892	25	0.0132135	0.018334
GATTTC	2118	14	0.00661001	0.00940362
GACCTT	1752	6	0.00342466	0.00341488
GACTTT	1987	5	0.00251636	0.00251129
GATCTT	1352	21	0.0155325	0.0182634
GATTTT	1686	5	0.0029656	0.00295856
GACCTG	2999	18	0.006002	0.00663508
GACTTG	2414	6	0.0024855	0.00248035
GATCTG	2422	27	0.0111478	0.0135064
GATTTG	1652	10	0.00605327	0.00844305
GACCGA	795	12	0.0150943	0.0224419
GACTGA	3403	7	0.00205701	0.00205338
GATCGA	249	10	0.0401606	0.0628967
GATTGA	1159	5	0.00431406	0.00429916
GACCGC	1962	25	0.0127421	0.0166657
GACTGC	3607	12	0.00332686	0.00719913
GATCGC	743	24	0.0323015	0.0447773
GATTGC	1581	13	0.00822264	0.0119577
GACCGT	718	10	0.0139276	0.0137528
GACTGT	3029	5	0.00165071	0.00164853
GATCGT	274	5	0.0182482	0.0253068
GATTGT	1305	9	0.00689655	0.00685424
GACCGG	1719	16	0.00930774	0.013883
GACTGG	4150	10	0.00240964	0.00288646
GATCGG	517	16	0.0309478	0.049428
GATTGG	3815	22	0.00576671	0.00783249
GCCCAA	3262	115	0.0352544	0.0432216
GCCTAA	1524	6	0.00393701	0.00392408
GCTCAA	2500	243	0.0972	0.127003
GCTTAA	1439	63	0.0437804	0.0474561
GCCCAC	5299	247	0.0466126	0.0644558
GCCTAC	1841	16	0.00869093	0.00862008
GCTCAC	4388	405	0.0922972	0.122092
GCTTAC	1383	43	0.0310918	0.0359356
GCCCAT	2978	99	0.0332438	0.0402112
GCCTAT	1565	15	0.00958466	0.0120564
GCTCAT	3348	207	0.061828	0.0777417
GCTTAT	1308	48	0.0366972	0.0476194
GCCCAG	11042	394	0.0356819	0.0429256
GCCTAG	2773	13	0.00468806	0.00466777
GCTCAG	7545	666	0.0882704	0.111773
GCTTAG	2310	113	0.0489177	0.0751288
GCCCCA	7495	183	0.0244163	0.0328972
GCCTCA	5209	42	0.00806297	0.00953559
GCTCCA	6000	295	0.0491667	0.0707611
GCTTCA	3138	95	0.0302741	0.03638
GCCCCC	9172	227	0.0247492	0.0289371
GCCTCC	10324	89	0.00862069	0.0112596
GCTCCC	8562	525	0.0613174	0.0823278
GCTTCC	7013	194	0.0276629	0.0360287
GCCCCT	7520	190	0.025266	0.0302167
GCCTCT	7092	48	0.00676819	0.00926176
GCTCCT	6746	324	0.0480285	0.0605543
GCTTCT	4551	117	0.0257086	0.0395587
GCCCCG	11137	237	0.0212804	0.0253194
GCCTCG	3428	30	0.00875146	0.009261
GCTCCG	5296	274	0.0517372	0.0747543
GCTTCG	1316	47	0.0357143	0.0451114
GCCCTA	2275	27	0.0118681	0.01613
GCCTTA	1893	13	0.00686741	0.00788093
GCTCTA	2164	56	0.025878	0.0298432
GCTTTA	1730	35	0.0202312	0.0325575
GCCCTC	8469	120	0.0141693	0.0191662
GCCTTC	4769	32	0.00671	0.0075053
GCTCTC	5366	147	0.0273947	0.0344777
GCTTTC	3458	58	0.0167727	0.0188103
GCCCTT	3981	69	0.0173323	0.0255789
GCCTTT	3444	21	0.00609756	0.00722392
GCTCTT	3654	131	0.0358511	0.0510001
GCTTTT	2594	23	0.00886662	0.00956269
GCCCTG	9672	114	0.0117866	0.015785
GCCTTG	4414	24	0.00543725	0.00631532
GCTCTG	8860	254	0.0286682	0.0350737
GCTTTG	3625	56	0.0154483	0.0179732
GCCCGA	2198	84	0.0382166	0.0513381
GCCTGA	5469	30	0.00548546	0.00801672
GCTCGA	805	43	0.0534161	0.0755014
GCTTGA	2117	34	0.0160605	0.0243166
GCCCGC	7483	195	0.0260591	0.0336699
GCCTGC	8452	49	0.00579744	0.00718447
GCTCGC	3102	169	0.054481	0.071523
GCTTGC	3076	62	0.020156	0.0256099
GCCCGT	1567	40	0.0255265	0.0389393
GCCTGT	5078	21	0.00413549	0.00451313
GCTCGT	966	46	0.047619	0.0536886
GCTTGT	2436	34	0.0139573	0.0145895
GCCCGG	7301	183	0.0250651	0.0299196
GCCTGG	10730	68	0.00633737	0.00797549
GCTCGG	3380	159	0.0470414	0.0566796
GCTTGG	4164	76	0.0182517	0.0208054
GTCCAA	1831	47	0.025669	0.0348599
GTCTAA	1115	7	0.00627803	0.00624421
GTTCAA	1312	113	0.086128	0.13369
GTTTAA	1387	59	0.0425379	0.0551878
GTCCAC	2491	32	0.0128462	0.0158992
GTCTAC	1021	4	0.00391773	0.0039062
GTTCAC	1829	132	0.0721706	0.08341
GTTTAC	1447	24	0.016586	0.0163222
GTCCAT	1686	28	0.0166074	0.021089
GTCTAT	1067	3	0.00281162	0.00280635
GTTCAT	1589	91	0.0572687	0.0754336
GTTTAT	1610	31	0.0192547	0.0226247
GTCCAG	4131	76	0.0183975	0.0233903
GTCTAG	1496	8	0.00534759	0.00532255
GTTCAG	2633	181	0.0687429	0.0906374
GTTTAG	1466	37	0.0252387	0.03554
GTCCCA	3451	45	0.0130397	0.0163517
GTCTCA	2989	20	0.0066912	0.00664865
GTTCCA	2569	110	0.0428182	0.0534618
GTTTCA	2487	75	0.0301568	0.0477628
GTCCCC	3637	56	0.0153973	0.0190148
GTCTCC	4250	20	0.00470588	0.00562624
GTTCCC	3652	212	0.0580504	0.0738683
GTTTCC	4050	83	0.0204938	0.0260062
GTCCCT	3771	51	0.0135243	0.0159974
GTCTCT	3747	19	0.00507072	0.00931758
GTTCCT	3411	129	0.0378188	0.0451969
GTTTCT	3309	50	0.0151103	0.0154911
GTCCCG	3017	41	0.0135897	0.0173882
GTCTCG	1166	14	0.0120069	0.0187398
GTTCCG	1585	72	0.0454259	0.0509655
GTTTCG	539	6	0.0111317	0.0110283
GTCCTA	1419	7	0.00493305	0.00491218
GTCTTA	1266	3	0.00236967	0.00236592
GTTCTA	1325	27	0.0203774	0.0214878
GTTTTA	1530	14	0.00915033	0.0103806
GTCCTC	3611	18	0.00498477	0.00551531
GTCTTC	2564	10	0.00390016	0.0046668
GTTCTC	2834	79	0.0278758	0.0348739
GTTTTC	2750	32	0.0116364	0.0136878
GTCCTT	2381	20	0.00839983	0.00833277
GTCTTT	2177	14	0.00643087	0.00731157
GTTCTT	2124	41	0.0193032	0.0255339
GTTTTT	2101	10	0.00475964	0.00569162
GTCCTG	4789	32	0.00668198	0.00872727
GTCTTG	2301	11	0.00478053	0.0108467
GTTCTG	3422	58	0.0169492	0.0236822
GTTTTG	2243	20	0.00891663	0.0106252
GTCCGA	696	14	0.0201149	0.0197387
GTCTGA	3153	9	0.00285442	0.0034817
GTTCGA	381	31	0.0813648	0.10652
GTTTGA	1688	26	0.0154028	0.0199167
GTCCGC	2099	22	0.0104812	0.0103763
GTCTGC	3568	17	0.00476457	0.00698598
GTTCGC	759	37	0.0487484	0.0649028
GTTTGC	2231	27	0.0121022	0.0173423
GTCCGT	814	9	0.0110565	0.0109477
GTCTGT	3114	9	0.00289017	0.00288275
GTTCGT	419	16	0.0381862	0.0703087
GTTTGT	2199	24	0.0109141	0.0189891
GTCCGG	1895	27	0.014248	0.0161644
GTCTGG	4308	10	0.00232126	0.00231641
GTTCGG	792	30	0.0378788	0.0390185
GTTTGG	2513	28	0.0111421	0.0134108
GGCCAA	4456	95	0.0213196	0.0267059
GGCTAA	1720	21	0.0122093	0.0178846
GGTCAA	1469	28	0.0190606	0.0309716
GGTTAA	1259	12	0.00953137	0.00944803
GGCCAC	6344	129	0.0203342	0.0252841
GGCTAC	2041	18	0.00881921	0.00972611
GGTCAC	3028	78	0.0257596	0.0350151
GGTTAC	1321	9	0.00681302	0.00828688
GGCCAT	2953	34	0.0115137	0.0120625
GGCTAT	1480	6	0.00405405	0.00539261
GGTCAT	2143	37	0.0172655	0.0197765
GGTTAT	1154	15	0.0129983	0.0128404
GGCCAG	8667	156	0.0179993	0.023447
GGCTAG	2275	13	0.00571429	0.00656364
GGTCAG	4045	100	0.0247219	0.0384589
GGTTAG	1540	15	0.00974026	0.0122507
GGCCCA	5598	89	0.0158985	0.0202939
GGCTCA	5033	42	0.00834492	0.00907184
GGTCCA	2178	45	0.0206612	0.0312679
GGTTCA	1755	42	0.0239316	0.0381955
GGCCCC	8678	96	0.0110625	0.0167037
GGCTCC	8873	81	0.00912882	0.0133296
GGTCCC	3687	61	0.0165446	0.0189883
GGTTCC	3141	37	0.0117797	0.0148293
GGCCCT	6097	63	0.010333	0.0125244
GGCTCT	6069	33	0.00543747	0.00573839
GGTCCT	2908	48	0.0165062	0.0210553
GGTTCT	2497	24	0.00961153	0.0111255
GGCCCG	5524	56	0.0101376	0.0129336
GGCTCG	2735	20	0.00731261	0.00799332
GGTCCG	1558	27	0.0173299	0.0208941
GGTTCG	743	10	0.013459	0.0132957
GGCCTA	2096	19	0.00906489	0.011851
GGCTTA	1884	7	0.0037155	0.00370366
GGTCTA	1115	6	0.00538117	0.00535701
GGTTTA	1405	6	0.00427046	0.00567976
GGCCTC	7203	51	0.00708038	0.00980823
GGCTTC	5081	37	0.00728203	0.00841153
GGTCTC	2754	30	0.0108932	0.0122315
GGTTTC	2962	22	0.00742741	0.00872563
GGCCTT	3907	28	0.00716662	0.00814115
GGCTTT	3495	15	0.00429185	0.00427465
GGTCTT	1854	15	0.00809061	0.00802949
GGTTTT	2443	19	0.00777732	0.010177
GGCCTG	8968	50	0.00557538	0.00643707
GGCTTG	3856	28	0.00726141	0.0103234
GGTCTG	3586	20	0.00557724	0.00666345
GGTTTG	2598	15	0.00577367	0.00651267
GGCCGA	2548	29	0.0113815	0.0136121
GGCTGA	6938	39	0.00562122	0.00616704
GGTCGA	480	7	0.0145833	0.0144007
GGTTGA	1859	18	0.00968263	0.0128233
GGCCGC	7636	87	0.0113934	0.0146704
GGCTGC	9775	51	0.00521739	0.00662307
GGTCGC	1486	29	0.0195155	0.0353091
GGTTGC	2438	19	0.00779327	0.00855639
GGCCGT	1962	22	0.011213	0.0141526
GGCTGT	5737	43	0.00749521	0.00953238
GGTCGT	524	6	0.0114504	0.015165
GGTTGT	1768	15	0.00848416	0.0118125
GGCCGG	7471	78	0.0104404	0.0130101
GGCTGG	11535	68	0.0058951	0.00915546
GGTCGG	1628	21	0.0128993	0.01397
GGTTGG	3207	25	0.00779545	0.0108562

## Sheet: 5_CPD_6hr_24hr_repair_4mer
seq	frac_repaired_6hr	frac_repaired_24hr
ACCA	0.631419	0.837878
ACCC	0.637531	0.845102
ACCG	0.50222	0.697626
ACCT	0.692703	0.835053
ACTA	0.856829	0.901445
ACTC	0.858755	0.872761
ACTG	0.81101	0.865
ACTT	0.896693	0.887435
ATCA	0.58138	0.843873
ATCC	0.53345	0.79117
ATCG	0.455996	0.719112
ATCT	0.615569	0.834001
ATTA	0.617043	0.848998
ATTC	0.579105	0.852537
ATTG	0.462863	0.787568
ATTT	0.689447	0.834694
CCCA	0.575358	0.796376
CCCC	0.462265	0.705105
CCCG	0.418586	0.684394
CCCT	0.634995	0.794889
CCTA	0.812771	0.850907
CCTC	0.749253	0.811231
CCTG	0.709793	0.773916
CCTT	0.786756	0.822638
CTCA	0.643236	0.842088
CTCC	0.509109	0.804911
CTCG	0.569376	0.792117
CTCT	0.693691	0.859169
CTTA	0.595956	0.854894
CTTC	0.578158	0.828357
CTTG	0.474906	0.770037
CTTT	0.69221	0.869459
GCCA	0.554429	0.604368
GCCC	0.490038	0.530618
GCCG	0.365691	0.409956
GCCT	0.645673	0.585759
GCTA	0.732974	0.730315
GCTC	0.693303	0.670228
GCTG	0.703086	0.551606
GCTT	0.753486	0.676561
GTCA	0.438895	0.5953
GTCC	0.384887	0.571022
GTCG	0.212708	0.37234
GTCT	0.520269	0.690109
GTTA	0.510178	0.720214
GTTC	0.429809	0.694857
GTTG	0.383447	0.63478
GTTT	0.524113	0.750043
TCCA	0.606248	0.863723
TCCC	0.523039	0.815834
TCCG	0.498608	0.79069
TCCT	0.698352	0.892486
TCTA	0.759417	0.914319
TCTC	0.774348	0.879871
TCTG	0.721314	0.891257
TCTT	0.827333	0.928483
TTCA	0.682496	0.883871
TTCC	0.542348	0.828425
TTCG	0.604593	0.864066
TTCT	0.712066	0.902534
TTTA	0.617631	0.870127
TTTC	0.59698	0.844371
TTTG	0.486084	0.805183
TTTT	0.667851	0.873353
