# Supplementary material for: High-throughput characterization of transcription factors that modulate UVdamage formation and repair at single-nucleotide resolution
Source: Research Square preprint supplement (doi:10.21203/rs.3.rs-8197218/v1), 2025-12-10
Supplement: Supplementary file 6 [file ba847e76d4650efce615058b.xlsx]

## Sheet: TOC
Supplementary quality metrics and run information for the Omni ATAC-seq experiment done for four biological replicates of C1SAN/CSB^WT cell line that was used in the paper "High-throughput characterization of transcription factors that modulate UV damage formation and repair at single-nucleotide resolution", Wasserman et al. Raw data can be found at GEOS accession GSE309644. Sequencing was done a…
Table of Contents
#	Dataset	Description
1	Run_quality_metrics	Quality metrics for the sequencing run
2	Run_demultiplex_stats	Demultiplexing statistics for the sequencing run
3	ATAC_QC_report	QC report generated by the ENCODE atac-seq analysis pipeline (v2.2.3)

## Sheet: 1_Run_quality_metrics
Lane	SampleID	index	index2	ReadNumber	Yield	YieldQ30	QualityScoreSum	Mean Quality Score (PF)	% Q30
2	G2940	TAAGGCGA	GCGATCTA	1	9036199017	8142652237	342986042404	37.96	0.9
2	G2940	TAAGGCGA	GCGATCTA	2	9036199017	8535101923	351078781108	38.85	0.94
2	G2941	CGTACTAG	ATAGAGAG	1	10466471228	9535798155	399325074072	38.15	0.91
2	G2941	CGTACTAG	ATAGAGAG	2	10466471228	9579439095	400140184380	38.23	0.92
2	G2942	AGGCAGAA	AGAGGATA	1	12297009772	11212944239	469402851392	38.17	0.91
2	G2942	AGGCAGAA	AGAGGATA	2	12297009772	11294523958	470925481408	38.3	0.92
2	G2943	TCCTGAGC	TCTACTCT	1	12097374586	10909749315	458976860424	37.94	0.9
2	G2943	TCCTGAGC	TCTACTCT	2	12097374586	11007813169	460967074648	38.1	0.91
2	G2944	CGTACTAG	GCGATCTA	1	12761266473	11430942093	482773185744	37.83	0.9
2	G2944	CGTACTAG	GCGATCTA	2	12761266473	12033111621	495346708320	38.82	0.94
2	G2945	AGGCAGAA	ATAGAGAG	1	12337541375	11297783735	471995938448	38.26	0.92
2	G2945	AGGCAGAA	ATAGAGAG	2	12337541375	11274367534	471293183128	38.2	0.91
2	G2946	TCCTGAGC	AGAGGATA	1	11009507727	10004379833	419352878576	38.09	0.91
2	G2946	TCCTGAGC	AGAGGATA	2	11009507727	10151187466	422492947552	38.38	0.92
2	G2947	TAAGGCGA	TCTACTCT	1	12432683274	11315039202	474092849052	38.13	0.91
2	G2947	TAAGGCGA	TCTACTCT	2	12432683274	11346935383	474588808480	38.17	0.91

## Sheet: 2_Run_demultiplex_stats
Lane	SampleID	Index	# Reads	# Perfect Index Reads	# One Mismatch Index Reads	# Two Mismatch Index Reads	% Reads	% Perfect Index Reads	% One Mismatch Index Reads	% Two Mismatch Index Reads
2	G2940	TAAGGCGA-GCGATCTA	89467317	87681338	1785979	0	0.0931	0.98	0.02	0
2	G2941	CGTACTAG-ATAGAGAG	103628428	100866823	2761605	0	0.1079	0.9734	0.0266	0
2	G2942	AGGCAGAA-AGAGGATA	121752572	119029208	2723364	0	0.1268	0.9776	0.0224	0
2	G2943	TCCTGAGC-TCTACTCT	119775986	116404304	3371682	0	0.1247	0.9719	0.0281	0
2	G2944	CGTACTAG-GCGATCTA	126349173	123704345	2644828	0	0.1315	0.9791	0.0209	0
2	G2945	AGGCAGAA-ATAGAGAG	122153875	119400211	2753664	0	0.1272	0.9775	0.0225	0
2	G2946	TCCTGAGC-AGAGGATA	109005027	106496279	2508748	0	0.1135	0.977	0.023	0
2	G2947	TAAGGCGA-TCTACTCT	123095874	119970836	3125038	0	0.1282	0.9746	0.0254	0

## Sheet: 3_ATAC_QC_report
General
Report generated at	2024-09-04 06:43:24
Title	WT_CSB_HSF_ATAC_seq_gz
Description	This is a input JSON for paired end Omni-ATAC on WT_CSB human skin fibroblasts
Pipeline version	v2.2.3
Pipeline type	atac
Genome	hg19
Aligner	bowtie2
Sequencing endedness	{'rep1': {'paired_end': True}, 'rep2': {'paired_end': True}, 'rep3': {'paired_end': True}, 'rep4': {'paired_end': True}}
Peak caller	macs2
Alignment quality metrics
SAMstat (raw unfiltered BAM)
	rep1	rep2	rep3	rep4
Total Reads	252688592	244299414	218001806	246183502
Total Reads (QC-failed)	0	0	0	0
Duplicate Reads	0	0	0	0
Duplicate Reads (QC-failed)	0	0	0	0
Mapped Reads	239249379	226072343	204875636	226363436
Mapped Reads (QC-failed)	0	0	0	0
% Mapped Reads	94.7	92.5	94	91.9
Paired Reads	252688592	244299414	218001806	246183502
Paired Reads (QC-failed)	0	0	0	0
Read1	126344296	122149707	109000903	123091751
Read1 (QC-failed)	0	0	0	0
Read2	126344296	122149707	109000903	123091751
Read2 (QC-failed)	0	0	0	0
Properly Paired Reads	230268444	216688306	196304422	217441830
Properly Paired Reads (QC-failed)	0	0	0	0
% Properly Paired Reads	91.1	88.7	90	88.3
With itself	236298044	223495196	202285896	223443230
With itself (QC-failed)	0	0	0	0
Singletons	2951335	2577147	2589740	2920206
Singletons (QC-failed)	0	0	0	0
% Singleton	1.2	1.1	1.2	1.2
Diff. Chroms	1849536	2592982	2259002	2152216
Diff. Chroms (QC-failed)	0	0	0	0
Marking duplicates (filtered BAM)
	rep1	rep2	rep3	rep4
Unpaired Reads	0	0	0	0
Paired Reads	102589341	97762597	87701968	97850040
Unmapped Reads	0	0	0	0
Unpaired Duplicate Reads	0	0	0	0
Paired Duplicate Reads	17818563	15033435	14972907	18160953
Paired Optical Duplicate Reads	943219	930756	874763	791995
% Duplicate Reads	17.3688	15.3775	17.0725	18.56
SAMstat (filtered/deduped BAM)
	rep1	rep2	rep3	rep4
Total Reads	167383092	163753770	143536114	157462412
Total Reads (QC-failed)	0	0	0	0
Duplicate Reads	0	0	0	0
Duplicate Reads (QC-failed)	0	0	0	0
Mapped Reads	167383092	163753770	143536114	157462412
Mapped Reads (QC-failed)	0	0	0	0
% Mapped Reads	100	100	100	100
Paired Reads	167383092	163753770	143536114	157462412
Paired Reads (QC-failed)	0	0	0	0
Read1	83691546	81876885	71768057	78731206
Read1 (QC-failed)	0	0	0	0
Read2	83691546	81876885	71768057	78731206
Read2 (QC-failed)	0	0	0	0
Properly Paired Reads	167383092	163753770	143536114	157462412
Properly Paired Reads (QC-failed)	0	0	0	0
% Properly Paired Reads	100	100	100	100
With itself	167383092	163753770	143536114	157462412
With itself (QC-failed)	0	0	0	0
Singletons	0	0	0	0
Singletons (QC-failed)	0	0	0	0
% Singleton	0	0	0	0
Diff. Chroms	0	0	0	0
Diff. Chroms (QC-failed)	0	0	0	0
Annotated genomic region enrichment
	rep1	rep2	rep3	rep4
Fraction of Reads in universal DHS regions	0.427037	0.497092	0.450456	0.517136
Fraction of Reads in blacklist regions	0.00749835	0.0065473	0.00731296	0.00673412
Fraction of Reads in promoter regions	0.149108	0.175608	0.152885	0.184213
Fraction of Reads in enhancer regions	0.38321	0.411585	0.396758	0.418009
Library complexity quality metrics
Library complexity (filtered non-mito BAM)
	rep1	rep2	rep3	rep4
Total Fragments	94492533	93019612	81269602	91147774
Distinct Fragments	84564748	83090005	72590265	80136375
Positions with Two Read	6870036	6403623	6002588	7014708
NRF = Distinct/Total	0.894936	0.893253	0.893203	0.879192
PBC1 = OneRead/Distinct	0.906657	0.908488	0.904674	0.895676
PBC2 = OneRead/TwoRead	11.1602	11.7881	10.9404	10.2322
Replication quality metrics
Reproducibility QC and peak detection statistics
	overlap	idr
Nt	246569	151158
N1	216243	122765
N2	227179	135316
N3	214796	123125
N4	229442	138273
Np	259524	159818
N optimal	259524	159818
N conservative	246569	151158
Optimal Set	pooled-pr1_vs_pooled-pr2	pooled-pr1_vs_pooled-pr2
Conservative Set	rep2_vs_rep4	rep2_vs_rep4
Rescue Ratio	1.05254	1.05729
Self Consistency Ratio	1.06819	1.12632
Reproducibility Test	pass	pass
Number of raw peaks
	rep1	rep2	rep3	rep4
Number of peaks	298569	298787	298744	298783
Peak calling statistics
Peak region size
	rep1	rep2	rep3	rep4	idr_opt	overlap_opt
Min size	150	150	150	150	150	150
25 percentile	244	236	233	237	463	336
50 percentile (median)	411	387	379	394	727	586
75 percentile	718	686	669	697	1065	940
Max size	3002	2918	2870	3092	3094	3506
Mean	534.777	512.476	504.895	520.586	806.763	693.781
Enrichment / Signal-to-noise ratio
TSS enrichment (filtered/deduped BAM)
	rep1	rep2	rep3	rep4
TSS enrichment	19.662	22.7713	20.4194	23.9904
Jensen-Shannon distance (filtered/deduped BAM)
	rep1	rep2	rep3	rep4
AUC	0.177758	0.151577	0.169049	0.144975
Synthetic AUC	0.496963	0.496946	0.496706	0.49682
X-intercept	0.129352	0.137759	0.135861	0.14099
Synthetic X-intercept	0	0	0	0
Elbow Point	0.753432	0.791306	0.763528	0.802854
Synthetic Elbow Point	0.503656	0.501634	0.50362	0.502135
Synthetic JS Distance	0.466466	0.516426	0.481176	0.528912
Peak enrichment
FRiP for macs2 raw peaks
	rep1	rep2	rep3	rep4	rep1-pr1	rep2-pr1	rep3-pr1	rep4-pr1	rep1-pr2	rep2-pr2	rep3-pr2	rep4-pr2	pooled	pooled-pr1	pooled-pr2
Fraction of Reads in Peaks	0.362319	0.437676	0.386536	0.460574	0.358626	0.434273	0.382924	0.455909	0.356536	0.432107	0.382897	0.455032	0.423811	0.418972	0.416635
FRiP for overlap peaks
	rep1_vs_rep2	rep1_vs_rep3	rep1_vs_rep4	rep2_vs_rep3	rep2_vs_rep4	rep3_vs_rep4	rep1-pr1_vs_rep1-pr2	rep2-pr1_vs_rep2-pr2	rep3-pr1_vs_rep3-pr2	rep4-pr1_vs_rep4-pr2	pooled-pr1_vs_pooled-pr2
Fraction of Reads in Peaks	0.401048	0.399508	0.400906	0.401989	0.404346	0.40193	0.33403	0.414425	0.358228	0.438423	0.409765
FRiP for IDR peaks
	rep1_vs_rep2	rep1_vs_rep3	rep1_vs_rep4	rep2_vs_rep3	rep2_vs_rep4	rep3_vs_rep4	rep1-pr1_vs_rep1-pr2	rep2-pr1_vs_rep2-pr2	rep3-pr1_vs_rep3-pr2	rep4-pr1_vs_rep4-pr2	pooled-pr1_vs_pooled-pr2
Fraction of Reads in Peaks	0.351974	0.350024	0.352175	0.35365	0.357324	0.353715	0.287011	0.36874	0.310846	0.39184	0.362806
